# Supplementary material for: Systems-Level Insights into Bronchopulmonary Dysplasia from Meta-Analysis of Genome- Scale Studies
Source: Research Square preprint supplement (doi:10.21203/rs.3.rs-8552464/v1), 2026-01-21
Supplement: Supplementary file 1 [file 775a751d2597be208d1810c0.xlsx]

## Sheet: human_gsea_go
ONTOLOGY	ID	Description	setSize	enrichmentScore	NES	pvalue	p.adjust	qvalue	rank	leading_edge	core_enrichment
CC	GO:0072562	blood microparticle	62	0.623254	3.97332	1e-10	1.0349e-08	7.29108e-09	1341	tags=73%	list=18%	signal=60%	3240/3514/7018/3959/1191/716/3502/3048/3493/922/183/462/3310/3075/6513/2934/3043/335/3698/337/5345/3500/1370/7448/3827/715/3538/2266/3263/2/12/710/3507/3512/713/197/3039/3700/173/1/5005/83939/2022/2040/590
MF	GO:0140375	immune receptor activity	67	0.552528	3.61296	1e-10	1.0349e-08	7.29108e-09	1336	tags=58%	list=18%	signal=48%	7850/9173/149233/163702/3575/960/1236/3119/8809/2205/1380/643/3118/9214/3554/3117/8808/2840/5284/57007/3111/8807/3122/3140/1378/3953/11126/3595/131450/920/2213/3120/55540/3112/3113/972/3579/3821/2674
CC	GO:0009897	external side of plasma membrane	169	0.43867	3.50333	1e-10	1.0349e-08	7.29108e-09	1600	tags=50%	list=21%	signal=40%	914/4063/84824/79368/911/9173/1901/149233/100133941/3680/940/939/3575/11118/1236/915/115350/925/6401/2205/974/643/83416/388512/115352/9308/2352/7049/3554/57007/6504/958/3604/6382/824/3791/6403/3140/8764/100507436/8784/84966/3953/910/8515/165530/3595/917/916/10384/131450/959/920/921/2213/931/933/930/2266/2206/762/23627/338328/9332/115650/3815/972/7057/2022/3579/3821/2674/6387/5156/8516/6340/1012/2…
BP	GO:0006959	humoral immune response	123	0.461618	3.46819	1e-10	1.0349e-08	7.29108e-09	1608	tags=57%	list=21%	signal=45%	55061/940/10578/4068/7018/1236/1191/2625/716/3502/3493/3119/922/1380/712/3574/9308/9214/3576/11326/5443/6361/1880/3075/1604/1378/1675/1991/1511/1669/29760/2213/3500/931/3827/5450/715/3263/2/710/6362/3507/51297/10563/3512/3958/6374/713/6367/5197/6368/6347/283/133/820/5648/6387/6038/28984/5919/10417/8993/5657/3426/4283/4316/3494/671/4069/2627
BP	GO:1903039	positive regulation of leukocyte cell-cell adhesion	128	0.440488	3.3473	1e-10	1.0349e-08	7.29108e-09	1242	tags=45%	list=17%	signal=38%	149233/100133941/940/29851/1803/55423/10125/939/51176/3575/960/9840/1236/2625/57492/3119/6401/177/3574/3115/9308/3118/3552/3117/3142/8808/3111/6504/3932/3122/7292/6403/8764/1604/2736/1378/11126/5590/923/916/8631/959/1991/920/921/3485/3120/3479/3127/8876/3108/115650/3112/3113/972/6347/4192
CC	GO:0009986	cell surface	344	0.3801	3.31015	1e-10	1.0349e-08	7.29108e-09	1600	tags=44%	list=21%	signal=37%	7850/914/4063/84824/79368/5738/911/9173/1901/149233/7039/2261/100133941/3680/940/1803/4680/939/3575/960/4008/11118/7018/1236/1191/915/115350/8809/925/6401/922/2205/26585/974/643/177/83416/3115/388512/4919/115352/9308/2352/7049/3552/3554/8808/57007/6504/958/3604/8807/9378/3122/7292/6382/824/6272/963/55248/8497/3791/6403/3140/8764/91/100507436/1604/8784/6900/307/84966/1378/3953/3321/910/8515/165530…
BP	GO:0022409	positive regulation of cell-cell adhesion	154	0.41723	3.28238	1e-10	1.0349e-08	7.29108e-09	1242	tags=43%	list=17%	signal=37%	149233/100133941/940/29851/1803/55423/4680/10125/939/51176/3575/960/9840/1236/2625/57492/3119/6401/177/3574/3115/9308/3118/3552/3117/3142/8808/3111/6504/3932/3122/3716/7292/6403/8764/1604/22920/2736/1378/11126/5590/923/916/8631/959/1991/1511/920/921/5345/2266/3485/3120/10563/3479/7082/3127/8728/8876/3108/115650/3112/3113/972/6347/4192
CC	GO:0098552	side of membrane	299	0.380099	3.28144	1e-10	1.0349e-08	7.29108e-09	1560	tags=43%	list=21%	signal=35%	914/57126/4063/26119/84824/79368/911/9173/1901/1043/149233/249/100133941/3680/940/4680/939/3575/84628/91782/11118/1236/915/1269/115350/3119/925/6401/2205/55600/974/643/83416/3115/388512/115352/9308/2352/3118/7049/3554/3117/57007/7803/7188/2791/6504/958/3604/3122/23263/3716/962/6382/824/3791/6403/3140/8764/8434/100507436/2780/1604/8784/5778/6900/8514/84966/3953/910/8515/11126/63827/165530/3595/599…
BP	GO:0050870	positive regulation of T cell activation	119	0.432708	3.23397	1e-10	1.0349e-08	7.29108e-09	1242	tags=44%	list=17%	signal=37%	149233/100133941/940/29851/1803/55423/10125/939/51176/3575/9840/1236/2625/57492/3119/177/3574/3115/9308/3118/3552/3117/3142/8808/3111/6504/3932/3122/7292/8764/1604/2736/1378/11126/5590/923/916/959/920/921/3485/3120/3479/3127/8876/3108/115650/3112/3113/972/6347/4192
BP	GO:0002449	lymphocyte mediated immunity	153	0.406089	3.19498	1e-10	1.0349e-08	7.29108e-09	942	tags=35%	list=13%	signal=32%	914/55061/911/149233/940/4068/10225/10125/939/100423062/3575/3514/11118/1191/2625/716/56253/3502/3493/8809/925/2205/1380/177/712/9214/3554/91543/6504/958/8807/3122/7292/81607/3140/117157/5551/100507436/1604/2956/1378/910/11126/5590/10384/959/2213/3500/23075/715/930/3538/3263/710
BP	GO:0007159	leukocyte cell-cell adhesion	191	0.379654	3.10406	1e-10	1.0349e-08	7.29108e-09	1362	tags=41%	list=18%	signal=34%	57126/5320/149233/100133941/940/29851/1803/55423/10125/939/51176/3575/960/9840/116844/1236/2625/56253/57492/3119/6401/177/3574/3115/9308/3118/3552/3117/3142/8808/11326/3111/6504/54900/3932/3122/7292/6403/10507/8764/8654/1604/2736/1378/11126/5590/923/916/8631/959/1991/1511/920/921/337/3485/3120/3958/84830/3479/3127/8876/3108/115650/3112/3113/4973/384/972/64116/6347/4192/64115/55824/445/6387/652/42…
BP	GO:0045785	positive regulation of cell adhesion	205	0.373193	3.07132	1e-10	1.0349e-08	7.29108e-09	1686	tags=46%	list=22%	signal=37%	149233/100133941/940/29851/1803/55423/9806/4680/10125/939/51176/3575/960/9840/1236/2625/57492/3119/6401/177/3574/3115/9308/3118/5581/4811/3552/3117/3142/8808/3111/6504/3932/3122/3716/7292/3791/6403/8764/2192/1604/8784/22920/2736/1378/11126/5590/923/916/8631/959/1991/1511/10562/920/335/921/5345/7448/2266/3485/3120/10563/2810/1295/6423/3479/3976/7082/3127/8728/8876/3108/115650/3112/3113/972/7010/63…
BP	GO:0002250	adaptive immune response	272	0.356652	3.05514	1e-10	1.0349e-08	7.29108e-09	1161	tags=35%	list=15%	signal=31%	4063/55061/911/9173/149233/940/3702/50852/4068/919/387357/939/28639/51176/100423062/3575/3514/11118/1191/915/2625/716/3502/3493/3119/8809/925/6097/2205/1380/974/177/712/3115/3118/255231/9214/3554/91543/3117/3142/3111/6504/54900/958/1880/8807/3122/3716/7292/257101/639/3140/8764/117157/5551/100507436/1604/2956/1378/910/11126/5590/917/923/28683/916/10384/8631/959/6774/920/54941/2213/3500/23075/715/9…
BP	GO:0030217	T cell differentiation	151	0.387792	3.03756	1e-10	1.0349e-08	7.29108e-09	866	tags=32%	list=12%	signal=29%	914/4063/149233/940/29851/3702/10125/387357/939/51176/3575/64919/9840/1236/915/2625/56253/57492/8809/925/6097/9760/3574/9308/3552/91543/3142/8808/3111/1880/3604/3932/3122/3716/7292/257101/639/8503/3140/2736/1378/3953/5590/917/916/6774/920/6932
BP	GO:1903037	regulation of leukocyte cell-cell adhesion	178	0.374406	3.02057	1e-10	1.0349e-08	7.29108e-09	1362	tags=40%	list=18%	signal=34%	5320/149233/100133941/940/29851/1803/55423/10125/939/51176/3575/960/9840/1236/2625/56253/57492/3119/6401/177/3574/3115/9308/3118/3552/3117/3142/8808/11326/3111/6504/54900/3932/3122/7292/6403/8764/8654/1604/2736/1378/11126/5590/923/916/8631/959/1991/1511/920/921/3485/3120/3958/84830/3479/3127/8876/3108/115650/3112/3113/384/972/6347/4192/64115/55824/445/6387/652/4254
BP	GO:0045321	leukocyte activation	442	0.337547	3.00612	1e-10	1.0349e-08	7.29108e-09	1887	tags=45%	list=25%	signal=36%	914/57126/4063/911/9173/5320/149233/100133941/940/29851/3702/1803/4068/55423/919/10125/9452/387357/939/28639/51176/9976/3575/64919/960/9840/6571/1236/1191/915/2625/4317/56253/1269/57492/306/115350/4064/26228/3119/8809/925/6097/2205/1380/51237/974/9760/643/177/712/3574/83416/3115/115352/9308/3118/5581/3552/91543/3117/3576/3142/8808/11326/3111/6504/54900/958/1880/3604/8807/3932/3122/3716/7292/9111/…
BP	GO:0042110	T cell activation	275	0.35009	3.0002	1e-10	1.0349e-08	7.29108e-09	1688	tags=43%	list=22%	signal=34%	914/4063/911/5320/149233/100133941/940/29851/3702/1803/55423/919/10125/387357/939/28639/51176/9976/3575/64919/960/9840/1236/915/2625/56253/57492/3119/8809/925/6097/9760/177/3574/3115/9308/3118/3552/91543/3117/3142/8808/11326/3111/6504/54900/1880/3604/3932/3122/3716/7292/257101/639/8503/3140/8764/8654/100507436/1604/2736/1378/3953/11126/5590/917/923/916/959/1511/6774/920/2934/921/6932/2213/3485/31…
BP	GO:0050863	regulation of T cell activation	191	0.366546	2.99688	1e-10	1.0349e-08	7.29108e-09	1688	tags=45%	list=22%	signal=36%	914/5320/149233/100133941/940/29851/1803/55423/10125/939/51176/3575/9840/1236/2625/56253/57492/3119/9760/177/3574/3115/9308/3118/3552/3117/3142/8808/11326/3111/6504/54900/3604/3932/3122/7292/257101/639/8764/8654/1604/2736/1378/11126/5590/923/916/959/1511/920/921/6932/3485/3120/3958/3479/3127/8876/3108/115650/3112/944/3113/57630/384/972/6347/4192/64115/55824/652/4254/1739/10538/1051/637/3135/27040…
BP	GO:0002443	leukocyte mediated immunity	193	0.365863	2.98923	1e-10	1.0349e-08	7.29108e-09	942	tags=32%	list=13%	signal=28%	914/57126/55061/911/149233/940/4068/10225/10125/939/100423062/3575/3514/11118/6571/1191/2625/716/56253/3502/306/3493/26228/8809/925/2205/1380/177/712/9214/3554/91543/5443/6504/958/8807/3122/7292/81607/3140/117157/5551/100507436/1604/2956/1378/910/11126/5590/10384/959/1991/1511/2213/3500/23075/715/930/3538/3263/710
CC	GO:0062023	collagen-containing extracellular matrix	192	0.365621	2.98913	1e-10	1.0349e-08	7.29108e-09	2910	tags=69%	list=39%	signal=44%	2200/5265/3959/1191/4317/1310/8685/183/26585/712/3914/3574/127435/4811/5176/462/7044/8425/2192/2662/3339/307/63827/10418/1991/1511/4318/158326/335/3698/337/5345/7448/3827/2266/3263/2/12/710/1359/64499/7177/1311/3958/1295/6423/25878/713/10631/131578/1288/350/4060/197/3700/1/5005/8728/80781/439921/4670/9068/7057/7076/4192/283/5553/1075/9510/11096/2201/23452/7472/11095/6387/4147/1000/5919/81035/1287…
BP	GO:0002696	positive regulation of leukocyte activation	166	0.372868	2.97567	1e-10	1.0349e-08	7.29108e-09	1820	tags=47%	list=24%	signal=36%	914/9173/149233/100133941/940/29851/1803/55423/10125/939/51176/3575/9840/1236/2625/4317/57492/26228/3119/9760/177/3574/3115/115352/9308/3118/3552/3117/3142/8808/3111/6504/958/1880/3932/3122/7292/8764/1604/2736/1378/11126/5590/923/916/959/920/921/3485/3120/3479/3127/8876/3108/115650/3112/3113/972/7057/6347/4192/1075/64115/4254/3135/301/2534/2737/6604/126259/30009/7468/3603/57181/3601/2033/403313/5…
BP	GO:0002252	immune effector process	302	0.34477	2.97501	1e-10	1.0349e-08	7.29108e-09	995	tags=31%	list=13%	signal=28%	914/57126/4063/55061/911/149233/4353/940/29851/4068/10225/10125/9452/939/51176/100423062/3575/3514/11118/6571/1191/2625/716/56253/3502/306/3493/4064/26228/8809/925/922/6097/2205/1380/51237/177/712/115352/5581/9214/3554/91543/3142/11326/5443/6504/958/1880/8807/3122/3716/7292/9111/257101/81607/3075/3140/8764/117157/5339/5551/100507436/1604/8291/2956/57142/1378/910/11126/5590/1675/10384/959/1991/151…
BP	GO:0030098	lymphocyte differentiation	199	0.36263	2.9734	1e-10	1.0349e-08	7.29108e-09	1840	tags=47%	list=25%	signal=36%	914/4063/149233/940/29851/3702/10125/9452/387357/939/51176/3575/64919/9840/1236/915/2625/56253/57492/8809/925/6097/1380/974/9760/3574/115352/9308/3552/91543/3142/8808/3111/6504/1880/3604/3932/3122/3716/7292/257101/639/9734/8503/3140/2736/1378/3953/5590/917/916/959/6774/920/6932/29760/2213/931/5450/930/3507/3624/8876/3815/944/7163/1316/57630/972/4192/22806/3821/64115/652/28514/6482/8993/10538/2852…
BP	GO:0050867	positive regulation of cell activation	174	0.368541	2.95773	1e-10	1.0349e-08	7.29108e-09	1820	tags=47%	list=24%	signal=36%	914/9173/149233/100133941/940/29851/1803/55423/10125/939/51176/3575/9840/1236/2625/4317/57492/26228/3119/9760/177/3574/3115/115352/9308/3118/3552/3117/3142/8808/3111/6504/958/1880/3932/3122/7292/6403/8764/1604/2736/4921/1378/11126/5590/923/916/959/920/921/3485/3120/3479/3127/8876/3108/115650/3112/3113/972/7057/6347/4192/1075/64115/4254/79987/3135/301/2534/2737/6604/126259/30009/7468/3603/57181/36…
BP	GO:0002460	adaptive immune response based on somatic recombination of immune receptors built from immunoglobulin superfamily domains	166	0.368094	2.93757	1e-10	1.0349e-08	7.29108e-09	952	tags=33%	list=13%	signal=29%	4063/55061/911/9173/149233/940/939/51176/100423062/3575/3514/11118/1191/2625/716/3502/3493/8809/925/6097/2205/1380/177/712/9214/3554/91543/3142/6504/958/3122/3716/7292/3140/5551/100507436/1604/2956/1378/910/5590/10384/959/6774/920/2213/3500/23075/715/930/3538/3263/710/10563
BP	GO:0001775	cell activation	489	0.318346	2.86574	1e-10	1.0349e-08	7.29108e-09	1887	tags=43%	list=25%	signal=35%	914/57126/4063/911/9173/5320/149233/100133941/940/29851/3702/1803/4068/55423/919/10125/9452/387357/939/28639/51176/9976/3575/64919/960/9840/6571/1236/1191/915/2625/4317/56253/1269/57492/306/115350/4064/26228/3119/8809/925/6097/2205/1380/51237/974/9760/643/177/712/3574/83416/3115/115352/9308/3118/5581/3552/91543/3117/3576/3142/8808/11326/3111/688/6504/54900/958/1880/3604/8807/3932/3122/3716/7292/9…
BP	GO:1903131	mononuclear cell differentiation	233	0.340215	2.85574	1e-10	1.0349e-08	7.29108e-09	1882	tags=45%	list=25%	signal=35%	914/4063/9173/149233/940/29851/3702/10125/9452/387357/939/51176/3575/64919/9840/1236/915/2625/56253/57492/8809/925/6097/1380/974/9760/177/3574/115352/9308/3552/91543/3142/8808/3111/6504/1880/3604/3932/3122/3716/7292/257101/639/9734/8503/3140/2736/1378/3953/5590/51542/917/916/959/4318/6774/920/6932/29760/2213/931/5450/930/3507/3624/3976/81624/2150/8876/3815/944/7163/1316/57630/972/4192/22806/3821/…
BP	GO:0002694	regulation of leukocyte activation	277	0.331084	2.83922	1e-10	1.0349e-08	7.29108e-09	1832	tags=45%	list=24%	signal=35%	914/9173/5320/149233/100133941/940/29851/1803/55423/10125/939/51176/3575/9840/1236/2625/4317/56253/1269/57492/26228/3119/51237/9760/177/3574/3115/115352/9308/3118/3552/3117/3142/8808/11326/3111/6504/54900/958/1880/3604/3932/3122/7292/257101/639/8764/8654/100507436/1604/2736/1378/11126/5590/923/916/55013/959/1511/920/921/6932/55024/2213/933/930/3485/3120/3958/3624/3479/6664/23495/3127/8876/3108/11…
BP	GO:0002684	positive regulation of immune system process	492	0.313845	2.82727	1e-10	1.0349e-08	7.29108e-09	1376	tags=34%	list=18%	signal=30%	914/57126/55061/911/9173/80310/149233/100133941/940/29851/53347/3702/50852/1803/4068/55423/919/10125/387357/939/28639/51176/257144/3575/9840/80342/3514/9404/11118/1236/1191/915/2625/4317/716/56253/3502/57492/3493/26228/3119/8809/925/6401/922/1380/51237/974/79931/2069/9760/1687/177/92747/712/3574/3115/115352/9308/3118/5581/9214/3552/3554/91543/3117/3576/3142/8808/57402/11326/5443/3111/10623/6504/5…
MF	GO:0004888	transmembrane signaling receptor activity	380	0.322065	2.82718	1e-10	1.0349e-08	7.29108e-09	3089	tags=64%	list=41%	signal=40%	7850/84824/79368/9173/1901/149233/163702/2261/919/939/10913/3575/960/1236/915/1269/115350/3119/8809/6401/140/8685/2205/1380/974/643/177/2321/83416/79290/5792/4919/115352/3118/7049/9214/3554/3117/8808/2840/5284/57007/5732/3111/943/6504/1880/8807/9378/3122/83756/9934/6272/7100/8718/3791/8425/3140/10507/8764/91/2051/10154/5031/2780/8784/391107/4921/1378/3953/391192/3352/238/11126/576/3595/917/916/13…
BP	GO:0046649	lymphocyte activation	383	0.317256	2.78491	1e-10	1.0349e-08	7.29108e-09	1887	tags=43%	list=25%	signal=34%	914/4063/911/5320/149233/100133941/940/29851/3702/1803/4068/55423/919/10125/9452/387357/939/28639/51176/9976/3575/64919/960/9840/1236/915/2625/56253/57492/115350/4064/3119/8809/925/6097/1380/51237/974/9760/643/177/3574/83416/3115/115352/9308/3118/3552/91543/3117/3142/8808/11326/3111/6504/54900/958/1880/3604/3932/3122/3716/7292/257101/639/962/9734/8503/3140/8764/8654/5551/100507436/1604/2736/2956/…
CC	GO:0030312	external encapsulating structure	243	0.327538	2.77411	1e-10	1.0349e-08	7.29108e-09	1582	tags=44%	list=21%	signal=36%	54674/2200/249/9806/10321/5265/3959/1191/4317/1310/4064/8685/183/26585/712/3914/3574/127435/4811/5176/462/7044/8425/169611/2192/2662/3339/307/9860/25903/63827/10418/1116/1991/1511/4318/158326/335/3698/337/5345/1370/7448/3827/4320/2266/3263/2/12/710/1359/64499/7177/1311/3958/1295/170690/6423/25878/713/10631/131578/1288/350/4060/197/3700/1/5005/8728/80781/3730/439921/4670/8857/9068/7057/7076/4192/2…
CC	GO:0031012	extracellular matrix	243	0.327538	2.77411	1e-10	1.0349e-08	7.29108e-09	1582	tags=44%	list=21%	signal=36%	54674/2200/249/9806/10321/5265/3959/1191/4317/1310/4064/8685/183/26585/712/3914/3574/127435/4811/5176/462/7044/8425/169611/2192/2662/3339/307/9860/25903/63827/10418/1116/1991/1511/4318/158326/335/3698/337/5345/1370/7448/3827/4320/2266/3263/2/12/710/1359/64499/7177/1311/3958/1295/170690/6423/25878/713/10631/131578/1288/350/4060/197/3700/1/5005/8728/80781/3730/439921/4670/8857/9068/7057/7076/4192/2…
BP	GO:0022407	regulation of cell-cell adhesion	230	0.330742	2.7731	1e-10	1.0349e-08	7.29108e-09	1362	tags=37%	list=18%	signal=31%	5320/149233/100133941/940/29851/1803/55423/4680/10125/939/51176/3575/960/9840/1236/2625/56253/57492/4771/3119/6401/177/3574/3115/9308/3118/3552/3117/3142/8808/11326/3111/6504/54900/3932/3122/3716/7292/6403/8764/8654/1604/22920/2736/1378/11126/5590/923/916/8631/959/1991/1511/920/335/921/5345/23075/2266/3485/3120/10563/3958/2810/84830/3479/7082/3127/8728/8876/3108/115650/3112/3113/384/972/6347/4192…
BP	GO:0009617	response to bacterium	286	0.320438	2.75559	1e-10	1.0349e-08	7.29108e-09	1882	tags=45%	list=25%	signal=35%	1118/5320/149233/249/4353/100133941/10578/10225/225/3575/55125/3240/116844/7018/1236/4317/1269/3502/306/3493/4064/26228/6401/8564/79931/51257/5581/3552/274/3576/57402/5732/9636/129607/7538/958/7292/140733/842/2635/824/7100/5861/6403/3140/8764/100507436/1604/58484/6464/11126/3595/1675/5996/923/1991/1511/1669/4318/920/81793/55024/2213/3500/931/3507/51297/2167/10563/3512/6374/1734/54/23641/2150/5197…
BP	GO:0008284	positive regulation of cell population proliferation	343	0.313933	2.73458	1e-10	1.0349e-08	7.29108e-09	1746	tags=42%	list=23%	signal=34%	26119/128239/259266/9928/80310/1901/149233/7039/2261/100133941/940/1803/55423/4680/51176/3575/116844/219790/7272/332/3725/183/26585/51237/2069/9760/177/2321/3574/3115/115352/7049/3552/3142/51738/7188/605/6504/958/1880/7292/49860/3791/57448/595/2192/3162/5031/1604/245711/3339/57540/25949/57142/1907/4921/1378/3953/7015/6464/5590/3595/923/916/9241/959/1991/4318/6774/55022/10000/5345/3485/1311/6374/9…
BP	GO:0002521	leukocyte differentiation	273	0.317794	2.71917	1e-10	1.0349e-08	7.29108e-09	1962	tags=45%	list=26%	signal=34%	914/2200/4063/9173/149233/940/29851/3702/10125/9452/387357/939/51176/3575/64919/9840/7018/1236/915/2625/56253/57492/8809/925/6097/1380/974/9760/177/3574/115352/9308/3552/91543/3142/8808/3111/6504/1880/3604/3932/3122/9644/3716/7292/257101/639/9734/8503/3140/2736/1378/3953/63976/5590/51542/917/916/959/4318/1385/6774/920/6932/29760/2213/931/5450/930/5026/3507/3624/3976/81624/2150/8876/3815/944/7163/…
MF	GO:0038023	signaling receptor activity	466	0.303008	2.70999	1e-10	1.0349e-08	7.29108e-09	3089	tags=62%	list=41%	signal=39%	7850/914/10223/84824/79368/9173/1901/149233/163702/2261/940/29851/919/939/10913/3575/960/1236/915/1269/115350/3119/8809/925/6401/140/8685/6097/2205/1380/974/643/177/2321/83416/79290/388512/5792/4919/115352/2352/3118/7025/7049/6574/9214/3554/3117/8808/2840/5284/57007/5732/3111/943/6504/958/1880/3604/8807/9378/3122/83756/9934/6272/7100/8718/3791/1939/7068/8425/3140/10507/8764/91/2051/8434/10154/503…
MF	GO:0060089	molecular transducer activity	466	0.303008	2.70999	1e-10	1.0349e-08	7.29108e-09	3089	tags=62%	list=41%	signal=39%	7850/914/10223/84824/79368/9173/1901/149233/163702/2261/940/29851/919/939/10913/3575/960/1236/915/1269/115350/3119/8809/925/6401/140/8685/6097/2205/1380/974/643/177/2321/83416/79290/388512/5792/4919/115352/2352/3118/7025/7049/6574/9214/3554/3117/8808/2840/5284/57007/5732/3111/943/6504/958/1880/3604/8807/9378/3122/83756/9934/6272/7100/8718/3791/1939/7068/8425/3140/10507/8764/91/2051/8434/10154/503…
BP	GO:0050778	positive regulation of immune response	360	0.309383	2.7035	1e-10	1.0349e-08	7.29108e-09	957	tags=28%	list=13%	signal=25%	57126/55061/911/149233/940/53347/3702/50852/4068/919/10125/387357/28639/257144/9840/80342/3514/9404/11118/1236/1191/915/2625/716/56253/3502/3493/26228/3119/8809/925/922/1380/974/79931/2069/1687/92747/712/3115/115352/3118/5581/9214/3554/91543/3117/3142/57402/11326/3111/10623/6504/54900/958/8807/3932/3122/7292/9111/257101/7100/3075/3140/117157/7531/1604/58484/57142/1378/910/11126/5590/1675/917/916/…
BP	GO:0030155	regulation of cell adhesion	343	0.310105	2.70124	1e-10	1.0349e-08	7.29108e-09	1409	tags=36%	list=19%	signal=30%	9928/1901/5320/149233/100133941/940/29851/1803/55423/9806/4680/10125/939/51176/3575/960/9840/4008/9404/1236/2625/56253/57492/4771/3119/6401/26585/177/1545/3574/3115/10395/9308/3118/5581/4811/3552/3117/3576/3142/8808/11326/3111/6504/54900/3932/3122/3716/7292/9595/23499/3791/4070/6403/10507/8764/8654/2192/10154/1604/8784/22920/3339/2736/1378/11126/5590/923/916/8631/959/1991/1511/10562/920/5613/335/…
BP	GO:0050865	regulation of cell activation	300	0.312418	2.69636	1e-10	1.0349e-08	7.29108e-09	1832	tags=43%	list=24%	signal=34%	914/9173/5320/149233/100133941/940/29851/1803/55423/10125/939/51176/3575/9840/1236/2625/4317/56253/1269/57492/26228/3119/51237/9760/177/3574/3115/115352/9308/3118/3552/3117/3142/8808/11326/3111/6504/54900/958/1880/3604/3932/3122/7292/257101/639/6403/8764/8654/100507436/1604/2736/4921/1378/11126/5590/923/916/55013/959/1511/920/921/6932/55024/2213/933/930/3485/3120/3958/3624/3479/6664/23495/3127/88…
BP	GO:0001817	regulation of cytokine production	337	0.299177	2.60207	1e-10	1.0349e-08	7.29108e-09	1060	tags=28%	list=14%	signal=25%	7850/914/4063/9173/149233/100133941/940/53347/3702/10225/10642/225/51176/80342/11118/1236/1191/2625/4317/56253/8809/183/6614/2069/177/1545/3574/3115/9308/255231/3552/3554/91543/2703/6711/8808/9636/11326/51738/5443/28951/943/10623/7538/6504/958/7292/9111/257101/824/9451/9734/7100/6675/5861/8764/2192/3162/1604/58484/307/57142/10542/1378/7709/11126/23139/5590/3595/5600/923/916/10384/131450/9868/959/…
BP	GO:0050776	regulation of immune response	439	0.291165	2.59139	1e-10	1.0349e-08	7.29108e-09	958	tags=26%	list=13%	signal=24%	57126/55061/911/9173/149233/100133941/940/53347/3702/50852/4068/10225/919/10125/387357/28639/257144/3575/9840/80342/3514/9404/11118/1236/1191/915/2625/716/56253/3502/3493/26228/3119/8809/925/922/2205/1380/974/79931/2069/1687/177/92747/712/3115/115352/3118/5581/9214/3554/91543/3117/3142/2840/57402/5284/9636/11326/3111/10623/6504/54900/958/8807/3932/3122/7292/9111/257101/81607/7100/3075/3140/8764/1…
BP	GO:0001816	cytokine production	343	0.292943	2.55175	1e-10	1.0349e-08	7.29108e-09	1060	tags=28%	list=14%	signal=25%	7850/914/4063/9173/149233/100133941/940/53347/3702/10225/10642/225/51176/80342/11118/1236/1191/2625/4317/56253/8809/183/6614/2069/177/1545/3574/3115/9308/255231/3552/3554/91543/2703/6711/8808/9636/11326/51738/5443/28951/943/10623/7538/6504/958/7292/9111/257101/824/9451/9734/7100/6675/5861/8764/2192/3162/1604/58484/307/57142/10542/1378/7709/11126/23139/5590/3595/5600/923/916/10384/131450/9868/959/…
BP	GO:0098609	cell-cell adhesion	387	0.289755	2.54803	1e-10	1.0349e-08	7.29108e-09	1364	tags=33%	list=18%	signal=29%	914/57126/5320/149233/100133941/3680/940/29851/1803/55423/4680/10125/939/51176/3575/84628/960/9840/116844/1236/2625/56253/57492/4771/1310/3119/6401/6614/177/1545/3574/3115/5792/9308/3118/3552/3117/3142/8808/6282/11326/3111/6504/261734/54900/9378/3932/3122/3716/7292/81607/57463/49860/1832/6403/10507/8764/1266/8654/1604/22920/6900/23114/2736/84966/1378/6464/8515/11126/5590/923/916/131450/1823/8631/…
BP	GO:0035295	tube development	397	0.278659	2.45911	1e-10	1.0349e-08	7.29108e-09	1645	tags=38%	list=22%	signal=32%	2200/4774/1901/7039/100133941/51176/10913/116844/57125/2625/306/183/26585/2069/65979/1545/2321/51330/10395/7049/3552/5176/3576/3142/26227/57007/51738/58504/688/958/54206/9378/3716/639/6382/9451/9734/10352/3791/10806/7068/4070/157506/8503/2034/8434/3162/7161/3339/83931/2736/57142/1907/3953/57103/7015/6464/11126/576/1855/8195/9241/26249/23059/7289/51339/1116/1385/6774/1647/10000/5613/55333/9620/534…
BP	GO:0010628	positive regulation of gene expression	461	0.265615	2.37284	1e-10	1.0349e-08	7.29108e-09	1537	tags=33%	list=20%	signal=28%	914/4063/128239/9173/149233/11240/940/3702/10642/51176/10913/3575/80342/11118/1236/1191/2625/4317/56253/57492/26228/8809/183/115572/53335/51237/2069/177/1545/3574/3115/9308/7049/255231/54855/3552/3554/7088/91543/3576/8880/6711/8808/9636/5443/7188/943/10623/7538/6504/958/9378/7292/257101/639/9451/7100/6675/5861/8503/3399/65094/92906/8764/5337/91/2192/3162/1604/116496/1996/10269/6900/58484/57142/10…
BP	GO:0040011	locomotion	468	0.264892	2.36974	1e-10	1.0349e-08	7.29108e-09	1951	tags=41%	list=26%	signal=32%	9928/80310/1901/11240/3680/4681/1803/9806/4680/51176/257144/84628/23500/7018/1236/2625/1269/306/4771/26228/6401/140/183/26585/643/177/1545/2321/10395/5581/7049/127435/3552/3554/5176/3576/6282/57402/57007/51738/583/7803/6361/6504/958/1880/23499/9734/3791/4070/8503/6403/10507/8764/5586/5337/91/5339/2192/8434/3162/10154/5031/57449/8784/9860/57142/1907/4921/8394/7015/3352/8195/9241/131450/1991/1511/1…
BP	GO:0002768	immune response-regulating cell surface receptor signaling pathway	176	0.36058	2.90291	1.33998e-10	1.35901e-08	9.57452e-09	957	tags=32%	list=13%	signal=29%	100133941/940/53347/3702/50852/4068/919/387357/28639/257144/9840/3514/9404/11118/1236/915/2625/3502/3493/26228/3119/925/2205/1380/974/79931/92747/3115/115352/5581/9214/57402/5284/54900/958/3932/9111/257101/7100/1378/11126/917/916/10384/131450/8631/29760/55024/2213/640/3500/931/933/930/971/3507/3958
BP	GO:0001525	angiogenesis	200	0.340784	2.79541	2.32704e-10	2.31381e-08	1.63013e-08	1615	tags=44%	list=22%	signal=35%	1901/7039/51176/116844/57125/306/26585/2069/1545/2321/51330/7049/3552/5176/3576/57007/51738/58504/688/958/9378/3716/9451/9734/10352/3791/8503/2034/8434/3162/3339/57142/1907/3953/7015/6464/11126/576/1116/6774/1647/10000/5613/55333/10563/1295/84830/6423/350/7082/80781/2050/1990/7057/7010/2022/6347/7423/4192/283/3579/133/60675/79733/820/6943/2254/9510/28984/652/5156/28514/7291/9037/23554/1012/6050/5…
BP	GO:0050851	antigen receptor-mediated signaling pathway	117	0.412602	3.07836	2.54786e-10	2.48465e-08	1.75049e-08	957	tags=38%	list=13%	signal=33%	940/53347/3702/50852/4068/919/387357/28639/257144/9840/3514/9404/11118/1236/915/2625/3502/3493/26228/3119/925/974/3115/115352/9214/54900/3932/257101/11126/917/916/10384/8631/29760/55024/2213/640/3500/931/933/930/971/3507/3958
BP	GO:0001944	vasculature development	270	0.30304	2.59881	2.73698e-10	2.57023e-08	1.81078e-08	1625	tags=41%	list=22%	signal=33%	80310/1901/7039/51176/79652/116844/57125/306/26585/2069/1545/2321/51330/7049/3552/5176/3576/57007/51738/58504/688/958/54206/9378/3716/639/9451/9734/10352/3791/5784/8503/2034/3964/8434/3162/3339/57142/1907/3953/7015/6464/11126/576/9241/1116/6774/1647/10000/5613/55333/5345/10563/1311/1295/84830/6423/3976/350/8061/144165/7082/80781/3815/2050/1990/7057/7010/2022/6347/7423/4192/283/3579/133/60675/7973…
BP	GO:0072359	circulatory system development	422	0.26914	2.38797	2.73698e-10	2.57023e-08	1.81078e-08	2151	tags=45%	list=29%	signal=34%	2200/80310/1901/88/7039/51176/79652/116844/57125/2625/306/26585/2069/9249/1545/2321/51330/10395/7049/3552/5176/3576/57007/51738/56950/58504/80206/688/958/54206/9378/3716/639/9451/9734/10352/3791/5784/8503/3399/1832/2034/3964/34/5339/8434/3162/221476/7161/3339/10269/2736/4703/57142/1907/3953/7015/6464/284612/92749/11126/576/1855/8195/5600/9241/23059/9868/1116/1385/6774/1647/10000/5613/130916/55333…
BP	GO:0051249	regulation of lymphocyte activation	255	0.313024	2.65671	5.512e-10	5.08207e-08	3.58043e-08	1832	tags=43%	list=24%	signal=33%	914/5320/149233/100133941/940/29851/1803/55423/10125/939/51176/3575/9840/1236/2625/56253/57492/3119/51237/9760/177/3574/3115/115352/9308/3118/3552/3117/3142/8808/11326/3111/6504/54900/958/1880/3604/3932/3122/7292/257101/639/8764/8654/100507436/1604/2736/1378/11126/5590/923/916/959/1511/920/921/6932/55024/2213/933/930/3485/3120/3958/3624/3479/6664/23495/3127/8876/3108/115650/3112/944/3113/57630/38…
BP	GO:0035239	tube morphogenesis	318	0.290594	2.51644	6.13419e-10	5.55473e-08	3.91343e-08	1617	tags=39%	list=22%	signal=32%	1901/7039/51176/10913/116844/57125/2625/306/183/26585/2069/65979/1545/2321/51330/10395/7049/3552/5176/3576/3142/57007/51738/58504/688/958/9378/3716/639/9451/9734/10352/3791/10806/4070/157506/8503/2034/8434/3162/3339/2736/57142/1907/3953/7015/6464/11126/576/1855/8195/9241/26249/23059/7289/51339/1116/6774/1647/10000/5613/55333/9620/5345/10563/1311/1295/84830/170690/6423/6664/64399/64478/350/25928/3…
BP	GO:0002429	immune response-activating cell surface receptor signaling pathway	162	0.356631	2.83601	8.78419e-10	7.81484e-08	5.50573e-08	957	tags=32%	list=13%	signal=29%	940/53347/3702/50852/4068/919/387357/28639/257144/9840/3514/9404/11118/1236/915/2625/3502/3493/26228/3119/925/1380/974/79931/92747/3115/115352/5581/9214/57402/54900/3932/9111/257101/7100/1378/11126/917/916/10384/8631/29760/55024/2213/640/3500/931/933/930/971/3507/3958
BP	GO:0051251	positive regulation of lymphocyte activation	153	0.361719	2.84589	9.2865e-10	8.11929e-08	5.72022e-08	1242	tags=37%	list=17%	signal=31%	149233/100133941/940/29851/1803/55423/10125/939/51176/3575/9840/1236/2625/57492/3119/9760/177/3574/3115/115352/9308/3118/3552/3117/3142/8808/3111/6504/958/1880/3932/3122/7292/8764/1604/2736/1378/11126/5590/923/916/959/920/921/3485/3120/3479/3127/8876/3108/115650/3112/3113/972/6347/4192
BP	GO:0006954	inflammatory response	350	0.279827	2.4384	1.34425e-09	1.15537e-07	8.13987e-08	2191	tags=46%	list=29%	signal=34%	7850/9173/5320/149233/940/10225/10125/225/3240/960/5265/6571/1236/1191/2625/4317/1269/4064/26228/8809/6401/140/922/2205/183/6614/79931/1687/177/712/1036/3552/3554/3576/8808/2840/5732/51738/7538/6504/958/8807/7292/9111/2635/9734/7100/10628/55624/6403/3162/2780/3339/58484/57142/5590/51542/388581/923/131450/959/1116/1991/4318/6774/81793/335/29760/5345/2213/3500/3827/2/12/6362/2167/10563/55872/6374/5…
CC	GO:0034774	secretory granule lumen	129	0.387684	2.9441	1.49596e-09	1.26434e-07	8.90753e-08	1681	tags=50%	list=22%	signal=39%	1118/88/11240/4353/3240/10321/116844/5265/7018/3959/1191/4317/2352/978/6282/3699/51738/5443/7044/55276/3310/25797/1675/1116/1991/1511/1669/6947/10562/2934/335/5345/7276/3827/2266/2/12/710/3479/350/197/3700/1/5005/28988/3608/7057/7076/7423/820/1075/5919/29106/8993/30/23593/5657/847/55832/671/4069/55313/10916/51316
CC	GO:0031983	vesicle lumen	133	0.381434	2.91776	1.55656e-09	1.27312e-07	8.9694e-08	1681	tags=49%	list=22%	signal=39%	1118/88/11240/4353/3240/10321/116844/5265/7018/3959/1191/4317/2352/978/6282/3699/51738/5443/7044/55276/3310/5551/25797/1675/1116/1991/1511/1669/6947/10562/2934/335/5345/7276/3827/2266/2/12/710/3479/350/197/3700/1/5005/28988/3608/7057/7076/7423/820/1075/5919/29106/8993/30/23593/5657/847/55832/671/4069/55313/10916/51316
CC	GO:0060205	cytoplasmic vesicle lumen	133	0.381434	2.91776	1.55656e-09	1.27312e-07	8.9694e-08	1681	tags=49%	list=22%	signal=39%	1118/88/11240/4353/3240/10321/116844/5265/7018/3959/1191/4317/2352/978/6282/3699/51738/5443/7044/55276/3310/5551/25797/1675/1116/1991/1511/1669/6947/10562/2934/335/5345/7276/3827/2266/2/12/710/3479/350/197/3700/1/5005/28988/3608/7057/7076/7423/820/1075/5919/29106/8993/30/23593/5657/847/55832/671/4069/55313/10916/51316
BP	GO:0002706	regulation of lymphocyte mediated immunity	85	0.441565	3.06138	1.69642e-09	1.36549e-07	9.62014e-08	719	tags=34%	list=10%	signal=31%	55061/911/149233/940/4068/10225/10125/3575/2625/56253/8809/1380/177/3554/91543/6504/958/8807/3122/7292/81607/3140/117157/100507436/1604/1378/910/11126/5590
BP	GO:0031341	regulation of cell killing	47	0.54399	3.17823	1.84299e-09	1.46029e-07	1.0288e-07	716	tags=45%	list=10%	signal=41%	911/149233/4068/10125/3575/56253/26228/922/177/5443/8807/3122/81607/3075/3140/5551/100507436/1604/1378/910/11126
BP	GO:0048514	blood vessel morphogenesis	227	0.315856	2.64446	2.04259e-09	1.59353e-07	1.12268e-07	1615	tags=42%	list=22%	signal=34%	1901/7039/51176/116844/57125/306/26585/2069/1545/2321/51330/7049/3552/5176/3576/57007/51738/58504/688/958/9378/3716/639/9451/9734/10352/3791/8503/2034/8434/3162/3339/57142/1907/3953/7015/6464/11126/576/9241/1116/6774/1647/10000/5613/55333/5345/10563/1311/1295/84830/6423/350/7082/80781/2050/1990/7057/7010/2022/6347/7423/4192/283/3579/133/60675/79733/820/6943/2254/9510/6444/28984/652/5156/28514/100…
MF	GO:0023023	MHC protein complex binding	22	0.708222	3.1821	2.146e-09	1.64884e-07	1.16165e-07	1279	tags=82%	list=17%	signal=68%	3119/925/3115/3118/3117/3111/3122/7531/11126/920/931/3120/3127/3108/3112/3113/972/3821
BP	GO:0002703	regulation of leukocyte mediated immunity	106	0.400644	2.91111	2.22635e-09	1.68505e-07	1.18715e-07	719	tags=30%	list=10%	signal=28%	57126/55061/911/149233/940/4068/10225/10125/3575/2625/56253/26228/8809/1380/177/3554/91543/5443/6504/958/8807/3122/7292/81607/3140/117157/100507436/1604/1378/910/11126/5590
BP	GO:1901652	response to peptide	359	0.273702	2.39101	2.35008e-09	1.75253e-07	1.2347e-07	1882	tags=39%	list=25%	signal=31%	7850/26119/3899/9173/149233/163702/249/11240/2261/100133941/9806/51176/10913/3575/3434/960/7357/1236/2625/4317/26228/8809/6401/8564/1380/2069/1687/643/1545/2321/3574/3552/3554/5176/3576/8808/2840/57007/9636/583/7188/688/7538/958/8807/3716/8462/2635/824/8718/49860/3791/84676/6403/87178/8764/8491/8784/22823/1907/4921/3953/238/4656/3595/8195/5600/1116/1511/1385/6774/920/55022/2934/54941/335/6932/669…
BP	GO:2000145	regulation of cell motility	399	0.263627	2.32725	3.18138e-09	2.33809e-07	1.64723e-07	1619	tags=36%	list=22%	signal=30%	9928/80310/1901/11240/4681/1803/9806/4680/51176/257144/84628/23500/7018/1236/2625/306/4771/26228/6401/140/183/26585/177/1545/2321/10395/5581/7049/127435/3552/3554/5176/3576/6282/57402/57007/583/7803/6504/958/1880/23499/9734/3791/4070/8503/6403/10507/8764/5586/91/2192/8434/3162/10154/5031/8784/9860/57142/1907/4921/7015/8195/9241/131450/1991/4318/284119/6774/1647/10000/5613/55333/23075/7448/6362/10…
BP	GO:0001906	cell killing	109	0.400011	2.93013	4.04978e-09	2.89246e-07	2.0378e-07	2882	tags=70%	list=38%	signal=44%	914/911/5320/149233/10578/4068/10125/3575/56253/26228/922/177/3576/5443/6361/8807/3122/2635/81607/3075/3140/5551/100507436/1604/1378/910/11126/1991/1511/1669/2213/3500/3827/6362/10563/3958/6367/2150/3821/820/1075/2999/6387/8993/2215/3135/4283/4069/3004/3001/5532/54210/3251/4615/4879/23207/127544/731/732/2633/2634/388646/115362/353144/353142/114771/57115/912/909/913/57823/2212/2214/3080/81494/5788
BP	GO:0034097	response to cytokine	351	0.274322	2.39198	4.01647e-09	2.89246e-07	2.0378e-07	2937	tags=56%	list=39%	signal=36%	7850/26119/3899/9173/149233/163702/249/11240/2261/100133941/9806/51176/10913/3575/3434/960/7357/1236/2625/4317/26228/8809/6401/8564/1380/2069/1687/643/1545/2321/3574/3552/3554/3576/8808/2840/57007/9636/583/7188/688/7538/958/8807/3716/2635/824/8718/49860/3791/84676/6403/87178/8764/8491/8784/22823/1907/4921/3953/238/4656/3595/8195/5600/1116/1511/1385/6774/920/55022/2934/54941/335/6932/6696/2266/326…
BP	GO:0140546	defense response to symbiont	428	0.255147	2.26703	4.27352e-09	3.00987e-07	2.12052e-07	1887	tags=39%	list=25%	signal=31%	914/57126/4063/55061/149233/163702/10578/4068/10225/10125/3434/10321/80342/7018/1191/2625/716/56253/3502/3493/4064/8685/1380/79931/2069/92747/712/51257/115352/5581/255231/91543/3576/4688/8808/57402/9636/11326/5443/6361/10623/6504/958/54920/8807/3716/9111/257101/639/2635/81607/7100/84676/6675/3075/3140/8764/117157/8575/7531/100507436/1604/58484/57142/1378/11126/1675/923/9868/1991/1511/1669/2934/54…
BP	GO:0002253	activation of immune response	270	0.289007	2.47846	4.53057e-09	3.1472e-07	2.21727e-07	957	tags=27%	list=13%	signal=24%	55061/940/53347/3702/50852/4068/919/387357/28639/257144/9840/80342/3514/9404/11118/1236/1191/915/2625/716/3502/3493/26228/3119/925/922/1380/974/79931/92747/712/3115/115352/5581/9214/91543/57402/11326/54900/3932/9111/257101/7100/3075/7531/1604/58484/57142/1378/11126/1675/917/916/10384/8631/9868/54941/81793/29760/55024/2213/640/3500/931/933/715/930/971/2/710/3507/3958
BP	GO:0040012	regulation of locomotion	412	0.259915	2.29938	4.72336e-09	3.23678e-07	2.28038e-07	1951	tags=41%	list=26%	signal=32%	9928/80310/1901/11240/4681/1803/9806/4680/51176/257144/84628/23500/7018/1236/2625/306/4771/26228/6401/140/183/26585/177/1545/2321/10395/5581/7049/127435/3552/3554/5176/3576/6282/57402/57007/51738/583/7803/6504/958/1880/23499/9734/3791/4070/8503/6403/10507/8764/5586/91/2192/8434/3162/10154/5031/8784/9860/57142/1907/4921/7015/3352/8195/9241/131450/1991/4318/284119/6774/1647/10000/5613/55333/23075/7…
CC	GO:0099503	secretory vesicle	393	0.260571	2.29459	6.00861e-09	4.06262e-07	2.86221e-07	1596	tags=35%	list=21%	signal=29%	1118/57126/5320/88/11240/4353/4680/79895/8972/3240/960/10321/116844/5265/1731/154664/7018/3959/6571/1191/4317/1183/306/2352/274/978/4688/6282/5284/3699/51738/5443/155066/83858/89781/7044/55276/3310/963/9627/79888/1832/6403/11311/200162/5337/284697/1604/90342/127124/25797/23114/8291/8514/307/6518/1378/284612/23095/136242/1855/1675/81615/1823/1116/1991/1511/932/1669/4318/6947/1088/10562/2934/3043/3…
MF	GO:0019955	cytokine binding	55	0.509835	3.13192	6.44716e-09	4.30178e-07	3.0307e-07	1249	tags=53%	list=17%	signal=44%	7850/9173/149233/4681/116844/1236/4317/8809/26585/643/7049/3554/57007/7538/8425/8764/3953/3595/9241/1991/920/2/1311/25928/3815/972/7057/2022/3579
CC	GO:0030141	secretory granule	327	0.273003	2.3699	7.42682e-09	4.89109e-07	3.44588e-07	1596	tags=36%	list=21%	signal=30%	1118/57126/5320/88/11240/4353/4680/79895/8972/3240/960/10321/116844/5265/154664/7018/3959/6571/1191/4317/306/2352/978/4688/6282/5284/3699/51738/5443/83858/89781/7044/55276/3310/963/79888/1832/6403/200162/5337/1604/25797/23114/8514/307/6518/1378/136242/1855/1675/1823/1116/1991/1511/932/1669/4318/6947/1088/10562/2934/3043/335/5345/7276/3827/84329/2266/2/12/710/1359/3958/29923/3479/762/350/197/3700/…
MF	GO:0023026	MHC class II protein complex binding	18	0.724521	3.03626	1.07743e-08	7.00464e-07	4.93493e-07	1224	tags=83%	list=16%	signal=70%	3119/3115/3118/3117/3111/3122/7531/920/931/3120/3127/3108/3112/3113/972
BP	GO:0001568	blood vessel development	254	0.293015	2.48337	1.18419e-08	7.6013e-07	5.35529e-07	1617	tags=40%	list=22%	signal=32%	80310/1901/7039/51176/116844/57125/306/26585/2069/1545/2321/51330/7049/3552/5176/3576/57007/51738/58504/688/958/9378/3716/639/9451/9734/10352/3791/8503/2034/8434/3162/3339/57142/1907/3953/7015/6464/11126/576/9241/1116/6774/1647/10000/5613/55333/5345/10563/1311/1295/84830/6423/350/8061/144165/7082/80781/2050/1990/7057/7010/2022/6347/7423/4192/283/3579/133/60675/79733/820/6943/2254/9510/7472/6444/2…
BP	GO:0051094	positive regulation of developmental process	500	0.239366	2.15544	1.27224e-08	8.06439e-07	5.68154e-07	1840	tags=36%	list=25%	signal=29%	54674/128239/259266/5320/149233/100133941/940/4681/9334/10125/939/51176/3575/84079/9840/116844/5920/2625/57492/306/4771/183/53335/26585/8110/9760/93145/177/1545/2321/3574/57699/9308/7049/4811/3552/274/5176/3576/27042/3142/8808/9636/51738/583/688/605/7538/958/9378/3122/3716/7292/55252/824/23499/57463/963/10352/3791/9699/4070/10507/595/8654/91/2662/3162/10154/8648/7161/1996/2736/57142/4921/1378/701…
BP	GO:0008285	negative regulation of cell population proliferation	272	0.287017	2.45863	1.51866e-08	9.50755e-07	6.69828e-07	2207	tags=47%	list=29%	signal=35%	5320/163702/55423/64919/5920/2625/56253/4771/140/115572/26585/2069/1687/1545/2321/10395/7049/127435/3552/5176/2172/3576/6282/57007/11326/51738/10178/3664/56950/943/3604/9111/8462/5784/8764/8654/2192/3162/8575/7161/22920/3339/3814/1378/7709/10669/4656/5600/9241/1823/6774/55333/2213/2810/5950/3624/6423/1033/3976/6664/350/23641/8061/23495/80781/6368/1869/384/7057/2022/6347/283/55840/133/9510/10252/6…
BP	GO:0043410	positive regulation of MAPK cascade	166	0.331907	2.64878	1.53864e-08	9.51518e-07	6.70366e-07	1364	tags=37%	list=18%	signal=31%	128239/80310/5320/7039/2261/100133941/10125/939/10913/960/1236/8685/1687/177/2321/115352/5581/3552/57007/51738/10178/6504/958/1880/9378/3791/5031/7161/3814/4921/6464/5590/1116/1991/1647/920/55024/5345/2213/2266/3624/22943/116/3479/3976/153769/1908/2150/51384/3815/57630/972/7057/7010/7423/6764/2254/2252/9770/652/5156/1000
BP	GO:0050900	leukocyte migration	155	0.344769	2.72422	1.72101e-08	1.05147e-06	7.40786e-07	1878	tags=46%	list=25%	signal=36%	57126/80310/1901/11240/3680/4681/1803/257144/1236/2625/56253/1269/26228/6401/26585/643/177/2321/255231/3552/3554/3576/57402/6504/1880/3932/6403/8764/5339/3162/8784/57142/1907/131450/1991/1511/1669/23075/10563/9023/3958/84830/6374/6367/1908/2150/10894/5197/3815/6368/972/7057/6347/7423/4192/3579/6387/4254/5919/8976/5657/4283/301/2534/5734/30009/3603/54210/3655/9466/4615/23143
BP	GO:1903047	mitotic cell cycle process	295	0.278823	2.4038	1.78003e-08	1.07459e-06	7.57071e-07	1949	tags=41%	list=26%	signal=31%	6241/128239/699/4774/1058/9928/7039/8556/940/645121/6419/55125/55159/91782/146909/57492/57405/9787/7272/4751/332/4288/2069/8110/54443/9493/11130/26586/3552/63967/6711/2273/995/6905/10540/8900/4998/23397/605/1063/11004/51514/8462/9639/84722/23175/348654/595/1104/91/64793/245711/1639/10269/25949/4921/7015/114327/51339/79866/5888/10112/3624/983/220134/22974/3479/1033/1908/9088/11065/144165/3400/5514…
BP	GO:0030334	regulation of cell migration	382	0.258231	2.26699	2.03785e-08	1.20162e-06	8.46567e-07	1619	tags=36%	list=22%	signal=29%	9928/80310/1901/11240/4681/1803/4680/51176/257144/84628/23500/1236/2625/306/4771/26228/6401/140/183/26585/177/1545/2321/10395/5581/7049/127435/3552/3554/5176/3576/6282/57402/57007/7803/6504/958/1880/23499/9734/3791/4070/8503/6403/10507/8764/91/2192/8434/3162/10154/5031/8784/9860/57142/1907/4921/7015/9241/131450/1991/4318/6774/1647/10000/5613/55333/23075/7448/6362/10563/3958/84830/1081/6423/10631/…
BP	GO:0051241	negative regulation of multicellular organismal process	450	0.244575	2.17953	2.03785e-08	1.20162e-06	8.46567e-07	3005	tags=56%	list=40%	signal=36%	7850/2200/9173/5320/149233/100133941/3680/10225/225/51176/344/23500/1236/2625/56253/1269/4771/8809/6614/53335/26585/177/143872/9308/274/5176/3142/11326/51738/583/5443/28951/7538/6504/54900/7292/9111/257101/9451/9734/84676/4070/23175/8764/8654/91/2192/2662/29116/221476/100507436/7161/22920/3339/307/57142/1378/6464/63976/11126/576/5600/9241/131450/9868/1991/1511/51123/1647/54941/335/55333/55024/337…
MF	GO:0003823	antigen binding	47	0.520733	3.04236	2.08894e-08	1.21759e-06	8.57818e-07	1589	tags=62%	list=21%	signal=49%	911/100423062/3575/3514/3502/3493/3119/3115/3118/3117/3111/6504/958/3122/910/3500/3538/3120/3507/3512/3127/3543/3108/3112/3113/10417/23428/3135/3494
MF	GO:0030545	signaling receptor regulator activity	187	0.313773	2.55143	2.50418e-08	1.42682e-06	1.00522e-06	1448	tags=40%	list=19%	signal=33%	2200/80310/7039/4681/1803/9976/1191/183/26585/2069/3574/5581/3552/3576/51738/5443/7044/7292/962/81607/10507/2662/100507436/1907/388581/959/1511/335/7276/6696/3827/3485/10468/6362/10563/3958/3624/8000/6374/22943/1081/6423/116/3479/3976/6367/1908/5368/374/651/5197/51384/944/6368/2022/6347/7076/7423/4192/283/133/151176/1442/2254/2201/2252/7472/6387/652/4254/28514/9037/10512/51083/8993
BP	GO:0071345	cellular response to cytokine stimulus	315	0.272966	2.36342	2.47916e-08	1.42682e-06	1.00522e-06	1882	tags=39%	list=25%	signal=31%	7850/26119/9173/149233/163702/11240/2261/100133941/9806/51176/10913/3575/3434/960/7357/1236/2625/4317/26228/8809/8564/1380/2069/1687/643/1545/2321/3574/3552/3554/3576/8808/2840/57007/9636/583/7188/688/7538/958/8807/3716/2635/824/8718/49860/3791/87178/8764/8784/22823/1907/4921/3953/238/4656/3595/8195/5600/1116/1511/1385/6774/920/55022/2934/54941/335/6932/2266/3263/6362/2167/3624/26577/55540/10631/…
CC	GO:0042613	MHC class II protein complex	13	0.788972	2.91741	2.55281e-08	1.43837e-06	1.01336e-06	1224	tags=92%	list=16%	signal=77%	3119/3115/3118/3117/3111/3122/3120/3127/3108/3112/3113/972
BP	GO:0000165	MAPK cascade	264	0.291253	2.48376	2.69247e-08	1.50039e-06	1.05706e-06	1562	tags=36%	list=21%	signal=30%	25780/128239/80310/5320/7039/2261/100133941/10125/939/10913/6815/960/7018/1236/4771/8685/183/1687/177/2321/115352/5581/3552/57007/51738/10178/7538/6504/54900/958/1880/9378/3791/84451/84058/8491/2192/5031/7531/7161/10746/5778/3814/83931/4921/6464/5590/5600/51339/1116/1991/2887/1647/920/55333/55024/5345/2213/2266/3624/55872/8000/22943/983/116/3479/3976/153769/1908/2150/51384/3815/57630/972/7057/701…
BP	GO:0001819	positive regulation of cytokine production	221	0.305716	2.54492	2.76133e-08	1.50567e-06	1.06078e-06	1060	tags=29%	list=14%	signal=26%	914/4063/9173/149233/940/3702/80342/11118/1236/1191/2625/4317/56253/8809/183/2069/177/1545/3574/3115/9308/255231/3552/3554/91543/6711/8808/9636/943/10623/6504/958/7292/9451/7100/6675/5861/8764/3162/1604/58484/57142/10542/11126/5590/3595/5600/923/916/9868/959/1116/1991/6774/920/5345/2213/5450/29923/10631/116/4060/2150/5005
BP	GO:2000147	positive regulation of cell motility	232	0.297736	2.49818	2.75578e-08	1.50567e-06	1.06078e-06	1472	tags=37%	list=20%	signal=31%	80310/1901/9806/4680/51176/23500/7018/1236/2625/306/6401/183/177/1545/2321/5581/7049/3552/3554/3576/6282/57402/57007/7803/6504/958/9734/3791/8503/6403/10507/8764/91/2192/3162/5031/8784/57142/1907/4921/7015/4318/284119/6774/10000/23075/7448/6362/10563/3958/1081/10631/3479/153769/131578/6367/1908/2150/10894/208/7082/3815/7429/6368/972/7057/7010/6347/7423/4192/3579/2254/9510/2252/64115/6387/652/5156…
BP	GO:0002697	regulation of immune effector process	174	0.327576	2.62897	2.82817e-08	1.52571e-06	1.07489e-06	984	tags=29%	list=13%	signal=26%	57126/55061/911/149233/940/4068/10225/10125/3575/2625/56253/26228/8809/922/1380/51237/177/115352/3554/91543/3142/11326/5443/6504/958/8807/3122/7292/257101/81607/3075/3140/8764/117157/100507436/1604/57142/1378/910/11126/5590/959/335/2213/933/3263/2/710/3958/5950/54
BP	GO:0002705	positive regulation of leukocyte mediated immunity	69	0.451358	2.96299	2.93004e-08	1.53025e-06	1.0781e-06	719	tags=35%	list=10%	signal=32%	57126/911/149233/940/4068/10125/2625/56253/26228/8809/3554/91543/5443/6504/958/8807/3122/7292/3140/117157/1604/910/11126/5590
BP	GO:0002396	MHC protein complex assembly	12	0.79512	2.84213	2.98748e-08	1.53025e-06	1.0781e-06	1156	tags=92%	list=15%	signal=78%	3119/3115/3118/3117/3111/3122/3120/3127/3108/3112/3113
BP	GO:0002399	MHC class II protein complex assembly	12	0.79512	2.84213	2.98748e-08	1.53025e-06	1.0781e-06	1156	tags=92%	list=15%	signal=78%	3119/3115/3118/3117/3111/3122/3120/3127/3108/3112/3113
BP	GO:0002501	peptide antigen assembly with MHC protein complex	12	0.79512	2.84213	2.98748e-08	1.53025e-06	1.0781e-06	1156	tags=92%	list=15%	signal=78%	3119/3115/3118/3117/3111/3122/3120/3127/3108/3112/3113
BP	GO:0002503	peptide antigen assembly with MHC class II protein complex	12	0.79512	2.84213	2.98748e-08	1.53025e-06	1.0781e-06	1156	tags=92%	list=15%	signal=78%	3119/3115/3118/3117/3111/3122/3120/3127/3108/3112/3113
BP	GO:0042742	defense response to bacterium	127	0.363477	2.75964	3.08965e-08	1.54496e-06	1.08846e-06	1882	tags=51%	list=25%	signal=39%	5320/149233/4353/10578/3575/3240/7018/3502/306/3493/51257/57402/9636/2635/5861/6403/3140/8764/100507436/58484/6464/11126/1991/1511/1669/920/3500/3507/51297/10563/3512/54/2150/245911/6565/944/384/283/133/5553/820/11096/285195/6038/5919/81035/10417/8993/6035/1051/7132/1665/4316/7098/3494/671/4069/51316/8346/54210/9466/7097/8347/4615/29110
CC	GO:0000323	lytic vacuole	289	0.278342	2.39525	3.1076e-08	1.54496e-06	1.08846e-06	2275	tags=48%	list=30%	signal=35%	1118/911/11240/4353/10578/1803/4680/1519/84079/80342/91782/154664/1183/3119/3115/51257/3118/9214/3117/4688/5284/3111/245972/155066/89781/3122/6382/824/6272/4948/245973/79888/55016/57535/5337/56270/5551/3339/23334/10542/987/910/58511/23400/54896/63827/23120/81615/1991/1511/1669/1088/7782/55361/7276/3120/12/54/4060/5005/3127/283537/206358/8876/3108/3112/3113/100506658/972/64116/3579/120224/8530/353…
CC	GO:0005764	lysosome	289	0.278342	2.39525	3.1076e-08	1.54496e-06	1.08846e-06	2275	tags=48%	list=30%	signal=35%	1118/911/11240/4353/10578/1803/4680/1519/84079/80342/91782/154664/1183/3119/3115/51257/3118/9214/3117/4688/5284/3111/245972/155066/89781/3122/6382/824/6272/4948/245973/79888/55016/57535/5337/56270/5551/3339/23334/10542/987/910/58511/23400/54896/63827/23120/81615/1991/1511/1669/1088/7782/55361/7276/3120/12/54/4060/5005/3127/283537/206358/8876/3108/3112/3113/100506658/972/64116/3579/120224/8530/353…
BP	GO:0046631	alpha-beta T cell activation	103	0.39776	2.88927	3.47278e-08	1.70975e-06	1.20456e-06	834	tags=32%	list=11%	signal=29%	4063/149233/940/29851/3702/919/28639/51176/9976/64919/915/2625/56253/8809/6097/9760/177/9308/91543/3142/1880/3122/3716/7292/257101/639/8764/1604/11126/5590/917/916/6774
MF	GO:0044877	protein-containing complex binding	461	0.237705	2.12351	4.66975e-08	2.27695e-06	1.60416e-06	2212	tags=42%	list=29%	signal=32%	2200/57126/26119/128239/88/3680/9806/960/1191/3983/57492/4771/3119/925/2205/177/3914/4648/3115/5792/3118/7049/127435/4811/9214/274/63967/3117/6711/22848/5284/9636/3111/10540/80206/7538/1063/3932/3122/824/6272/23499/3791/3990/8425/6403/3140/6041/26278/3964/1266/1104/91/5339/2192/56270/9578/7531/2780/8648/22920/3339/2956/4703/4921/50809/1261/8515/11126/5590/917/916/54585/7289/959/53918/4318/920/293…
MF	GO:0030546	signaling receptor activator activity	176	0.324353	2.61126	5.20695e-08	2.51471e-06	1.77167e-06	1448	tags=41%	list=19%	signal=34%	2200/80310/7039/4681/1803/9976/1191/183/26585/2069/3574/5581/3552/3576/51738/5443/7044/7292/962/81607/10507/2662/100507436/1907/388581/959/1511/335/7276/6696/3827/6362/10563/3958/3624/6374/22943/1081/6423/116/3479/3976/6367/1908/5368/374/651/5197/51384/944/6368/2022/6347/7076/7423/4192/283/133/151176/1442/2254/2201/2252/7472/6387/652/4254/28514/9037/10512/51083/8993
BP	GO:0016310	phosphorylation	367	0.254249	2.22289	6.86884e-08	3.28603e-06	2.31508e-06	1847	tags=38%	list=25%	signal=30%	2200/9928/7039/2261/100133941/10125/2078/7018/1236/26228/817/4751/55600/332/183/26585/2069/177/2321/5581/63967/22848/995/10178/28951/54206/3932/3716/5208/23683/9451/3791/84722/84451/8503/57448/10507/6041/5586/595/8491/91/2192/9578/64793/8784/245711/65220/116496/4921/3953/57103/56997/238/81788/23139/5590/23400/916/1116/1991/1511/4318/1385/6774/2887/1647/920/55022/10000/5613/55024/640/7448/5616/281…
BP	GO:0060326	cell chemotaxis	123	0.353911	2.65897	8.29585e-08	3.92408e-06	2.7646e-06	1876	tags=49%	list=25%	signal=37%	80310/1901/11240/3680/4681/1803/51176/1236/1269/26228/26585/643/2321/3576/57402/57007/6504/1880/3791/5339/57449/1907/8394/1511/1669/23075/6362/10563/9023/3958/6374/6367/1908/2150/5197/3815/6368/5365/972/7057/2022/6347/7423/4192/3579/6387/5156/5919/9037/5159/1237/4283/301/3603/7074/1233/3315/54210/5872/9034
MF	GO:0048018	receptor ligand activity	172	0.321527	2.57429	8.35733e-08	3.92408e-06	2.7646e-06	1448	tags=41%	list=19%	signal=34%	2200/80310/7039/4681/1803/9976/1191/183/26585/2069/3574/3552/3576/51738/5443/7044/7292/962/81607/10507/2662/100507436/1907/388581/959/1511/335/7276/6696/3827/6362/10563/3958/3624/6374/22943/1081/6423/116/3479/3976/6367/1908/5368/374/651/5197/51384/944/6368/6347/7076/7423/4192/283/133/151176/1442/2254/2201/2252/7472/6387/652/4254/28514/9037/10512/51083/8993
CC	GO:0030139	endocytic vesicle	142	0.3445	2.65817	9.07897e-08	4.2238e-06	2.97576e-06	1581	tags=42%	list=21%	signal=34%	26119/7039/4353/10578/1803/3575/3240/7018/915/306/3119/817/8685/2069/3115/3118/79971/3117/4688/245972/155066/6504/9378/3122/5337/284697/57449/30845/8291/917/1991/920/2934/3043/335/84329/3263/3120/3039/9332/374/3127/6565/30846/3113/100506658/972/283/23682/285195/81035/2535/8993/57214/10981/8976/3135/2892/23392/10890
MF	GO:0004896	cytokine receptor activity	41	0.52557	2.9595	9.88608e-08	4.55748e-06	3.21085e-06	2298	tags=73%	list=31%	signal=51%	7850/9173/149233/163702/3575/960/1236/8809/643/3554/8808/2840/57007/8807/3953/3595/920/55540/972/3579/2674/1237/3601/1233/9466/9034/10936/58985/1441/4352
BP	GO:0030097	hemopoiesis	402	0.247734	2.18711	1.02246e-07	4.67105e-06	3.29086e-06	1962	tags=39%	list=26%	signal=30%	914/2200/4063/9173/149233/940/29851/3702/10125/9452/387357/939/51176/3575/64919/9840/7018/1236/915/2625/56253/57492/7153/219790/8809/925/6097/1380/974/9760/54443/177/3574/115352/9308/7049/3552/91543/3142/8808/9636/3111/7538/6504/1880/3604/3932/3122/9644/3716/7292/257101/639/842/9734/3791/8503/2034/3140/91/2736/1378/3953/63976/5590/51542/57217/917/916/4300/959/4318/1385/6774/920/5613/6932/29760/22…
BP	GO:0006468	protein phosphorylation	333	0.256259	2.22622	1.08548e-07	4.9147e-06	3.46251e-06	2196	tags=44%	list=29%	signal=33%	2200/9928/7039/2261/100133941/10125/2078/1236/817/4751/55600/332/183/26585/2069/177/2321/5581/63967/22848/995/10178/28951/54206/3932/3716/23683/9451/3791/84722/84451/8503/57448/10507/6041/5586/595/8491/91/2192/9578/64793/8784/245711/116496/4921/3953/238/81788/23139/5590/23400/916/1116/1991/1511/4318/1385/1647/920/55022/10000/5613/55024/640/7448/5616/2810/84830/22943/983/6423/116/22974/3479/1033/3…
MF	GO:0140677	molecular function activator activity	398	0.24622	2.1724	1.10655e-07	4.96579e-06	3.49851e-06	1455	tags=32%	list=19%	signal=27%	25780/2200/55635/128239/80310/7039/100133941/4681/1803/9976/84079/9882/344/1191/26228/3725/183/26585/2069/65979/3574/10395/143872/5581/3552/3576/4688/51738/5443/58504/7044/54206/3932/9644/7292/842/962/81607/128272/6004/10507/595/2192/2662/8575/100507436/9938/245711/9462/9910/2981/58484/1907/4660/238/388581/57514/5996/959/1511/335/54885/337/7276/6696/8115/3827/6362/10563/3958/3624/26577/6374/22943…
BP	GO:0040017	positive regulation of locomotion	235	0.292347	2.46043	1.13443e-07	5.04623e-06	3.55518e-06	1472	tags=37%	list=20%	signal=30%	80310/1901/9806/4680/51176/23500/7018/1236/2625/306/6401/183/177/1545/2321/5581/7049/3552/3554/3576/6282/57402/57007/7803/6504/958/9734/3791/8503/6403/10507/8764/91/2192/3162/5031/8784/57142/1907/4921/7015/4318/284119/6774/10000/23075/7448/6362/10563/3958/1081/10631/3479/153769/131578/6367/1908/2150/10894/208/7082/3815/7429/6368/972/7057/7010/6347/7423/4192/3579/2254/9510/2252/64115/6387/652/5156…
BP	GO:0019730	antimicrobial humoral response	64	0.448377	2.88159	1.21188e-07	5.34388e-06	3.76488e-06	1608	tags=59%	list=21%	signal=47%	10578/7018/3502/3493/3576/5443/6361/1991/1511/1669/3500/3827/6362/3507/51297/10563/3512/3958/6374/6367/5197/6368/6347/283/133/820/6387/6038/5919/10417/8993/5657/4283/4316/3494/671/4069/2627
CC	GO:0005773	vacuole	312	0.267151	2.30927	1.27517e-07	5.52682e-06	3.89376e-06	2275	tags=46%	list=30%	signal=34%	1118/911/11240/4353/10578/1803/4680/1519/84079/80342/91782/154664/1183/80183/3119/3115/51257/3118/9214/3117/4688/5284/3111/245972/155066/89781/3122/6382/824/6272/4948/245973/79888/55016/51100/57535/5337/56270/5551/3339/127124/23334/10542/987/910/440738/58511/23400/54896/63827/23120/81615/1991/1511/1669/1088/7782/55361/7276/3120/12/54/4060/5005/1738/3127/283537/206358/8876/3108/3112/3113/100506658…
BP	GO:0032101	regulation of response to external stimulus	439	0.238083	2.11895	1.27517e-07	5.52682e-06	3.89376e-06	1966	tags=38%	list=26%	signal=30%	55061/9173/80310/1901/5320/149233/163702/11240/940/4681/1803/4068/10225/10125/80342/1236/2625/4317/56253/4064/26228/6401/183/26585/79931/2069/177/92747/5792/115352/5581/3554/91543/3576/8808/2840/57402/462/9636/11326/51738/5443/10623/7538/6504/1880/8807/7292/9111/2635/81607/7100/3791/3075/117157/7531/100507436/1604/10269/58484/9860/57142/1907/1378/11126/388581/1855/131450/9868/1991/4318/6774/54941…
BP	GO:0043408	regulation of MAPK cascade	226	0.29214	2.44358	1.39027e-07	5.97464e-06	4.20927e-06	1562	tags=37%	list=21%	signal=30%	128239/80310/5320/7039/2261/100133941/10125/939/10913/6815/960/1236/4771/8685/183/1687/177/2321/115352/5581/3552/57007/51738/10178/6504/54900/958/1880/9378/3791/84058/2192/5031/7161/3814/83931/4921/6464/5590/51339/1116/1991/1647/920/55333/55024/5345/2213/2266/3624/55872/8000/22943/116/3479/3976/153769/1908/2150/51384/3815/57630/972/7057/7010/7423/6764/2254/10252/2252/9770/652/5156/1000/5997/1739/…
BP	GO:0002708	positive regulation of lymphocyte mediated immunity	58	0.461946	2.88299	1.58061e-07	6.70254e-06	4.72209e-06	719	tags=36%	list=10%	signal=33%	911/149233/940/4068/10125/2625/56253/8809/3554/91543/6504/958/8807/3122/7292/3140/117157/1604/910/11126/5590
BP	GO:0000280	nuclear division	184	0.311771	2.52796	1.58609e-07	6.70254e-06	4.72209e-06	1948	tags=44%	list=26%	signal=33%	699/259266/4774/9928/7039/8556/940/55125/1731/91782/146909/57405/7153/9787/7272/4751/332/4288/2069/54443/9493/11130/27030/3552/995/10540/8900/23397/1063/164045/11004/9639/84722/348654/1104/84944/64793/245711/22887/79866/122402/5888/983/220134/84057/22974/3479/3976/1908/9088/11065/144165/55143/124535/28984/652/7283/157313/3833/7589/5159/5892/3835/27183/9700/51510/9232/9319/5347/4487/54892/29127/38…
BP	GO:0030335	positive regulation of cell migration	226	0.291596	2.43904	1.62375e-07	6.80499e-06	4.79427e-06	1472	tags=37%	list=20%	signal=30%	80310/1901/4680/51176/23500/1236/2625/306/6401/183/177/1545/2321/5581/7049/3552/3554/3576/6282/57402/57007/7803/6504/958/9734/3791/8503/6403/10507/8764/91/2192/3162/5031/8784/57142/1907/4921/7015/4318/6774/10000/23075/7448/6362/10563/3958/1081/10631/3479/153769/131578/6367/1908/2150/10894/208/7082/3815/7429/6368/972/7057/7010/6347/7423/4192/3579/2254/9510/2252/64115/6387/652/5156/4254/5919/7291/9…
BP	GO:0006968	cellular defense response	19	0.674045	2.88315	1.69613e-07	7.05007e-06	4.96693e-06	1534	tags=79%	list=20%	signal=63%	3702/50852/10578/4068/3959/922/9214/4688/8808/5551/10219/8061/3579/3135/4283
BP	GO:0031640	killing of cells of another organism	48	0.490366	2.88739	1.99965e-07	8.11219e-06	5.71521e-06	2876	tags=83%	list=38%	signal=52%	5320/10578/3576/5443/6361/2635/5551/100507436/1991/1511/1669/3827/6362/10563/3958/6367/2150/820/2999/6387/8993/4283/4069/3004/3001/54210/4615/4879/731/732/2633/2634/388646/115362/353144/353142/114771/57115/3080/81494
BP	GO:0141060	disruption of anatomical structure in another organism	48	0.490366	2.88739	1.99965e-07	8.11219e-06	5.71521e-06	2876	tags=83%	list=38%	signal=52%	5320/10578/3576/5443/6361/2635/5551/100507436/1991/1511/1669/3827/6362/10563/3958/6367/2150/820/2999/6387/8993/4283/4069/3004/3001/54210/4615/4879/731/732/2633/2634/388646/115362/353144/353142/114771/57115/3080/81494
BP	GO:0141061	disruption of cell in another organism	48	0.490366	2.88739	1.99965e-07	8.11219e-06	5.71521e-06	2876	tags=83%	list=38%	signal=52%	5320/10578/3576/5443/6361/2635/5551/100507436/1991/1511/1669/3827/6362/10563/3958/6367/2150/820/2999/6387/8993/4283/4069/3004/3001/54210/4615/4879/731/732/2633/2634/388646/115362/353144/353142/114771/57115/3080/81494
CC	GO:0030669	clathrin-coated endocytic vesicle membrane	34	0.546036	2.88392	2.21748e-07	8.92448e-06	6.28749e-06	1224	tags=56%	list=16%	signal=47%	26119/7039/3575/7018/915/3119/2069/3115/3118/3117/3122/284697/917/920/3120/374/3127/3113/972
BP	GO:0019221	cytokine-mediated signaling pathway	203	0.296226	2.43459	2.24422e-07	8.96096e-06	6.31319e-06	2298	tags=48%	list=31%	signal=34%	7850/9173/149233/163702/11240/2261/100133941/10913/3575/960/7357/1236/4317/26228/8809/1380/2069/643/2321/3574/3552/3554/8808/2840/57007/9636/583/7188/958/8807/3716/8718/3791/8764/8784/1907/4921/3953/238/3595/8195/1511/6774/920/335/3263/6362/3624/55540/6367/2150/8061/115650/3815/2050/1154/6368/972/7010/6347/3579/6387/5156/5159/1237/6091/7132/4599/4283/6773/8904/2041/8519/146722/3603/3601/11274/123…
BP	GO:0009725	response to hormone	344	0.256175	2.23094	2.39348e-07	9.48231e-06	6.6805e-06	1868	tags=38%	list=25%	signal=30%	2200/88/249/11240/2261/100133941/23484/9882/7357/1236/2625/57492/306/3725/183/51237/2069/9249/1545/2321/1036/54541/5581/7049/2947/5176/5732/51738/583/5443/7538/54206/3716/7292/842/6382/6272/9734/3791/7068/84676/10628/23175/6429/8503/87178/595/5031/8648/6513/4921/3953/64754/6464/238/5590/51542/388581/256297/164091/8195/9868/1385/6774/2887/55022/6696/3485/2/3624/5069/84830/1081/1591/197/208/8061/37…
BP	GO:0060429	epithelium development	432	0.237666	2.11184	2.85946e-07	1.12406e-05	7.91922e-06	3424	tags=62%	list=46%	signal=36%	128239/1901/100133941/51176/10913/64919/960/7357/116844/5920/2625/4771/183/26585/2069/1687/65979/10395/4610/2947/3552/26227/3664/688/7538/54206/639/6382/84879/3791/7068/9687/4070/10628/157506/3399/1832/2034/595/1266/84173/91/5339/23254/7161/10269/307/2736/57142/57103/8394/2016/1855/8195/92344/9241/340547/1823/3212/26249/23059/7289/51339/53918/4318/1385/5613/9620/10468/220/3958/2810/3624/170690/22…
BP	GO:0002504	antigen processing and presentation of peptide or polysaccharide antigen via MHC class II	20	0.659415	2.87129	3.32318e-07	1.29629e-05	9.13268e-06	1236	tags=75%	list=16%	signal=63%	3119/3115/3118/3117/3111/3122/55016/2213/3120/3127/3108/3112/3113/972/7057
CC	GO:0042611	MHC protein complex	17	0.682115	2.79732	3.36412e-07	1.29639e-05	9.13333e-06	1532	tags=82%	list=20%	signal=66%	3119/3115/3118/3117/3111/3122/3140/3120/3127/3108/3112/3113/972/3135
BP	GO:0002764	immune response-regulating signaling pathway	249	0.277966	2.35969	3.37454e-07	1.29639e-05	9.13333e-06	957	tags=26%	list=13%	signal=23%	100133941/940/53347/3702/50852/4068/919/387357/28639/257144/9840/80342/3514/9404/11118/1236/915/2625/3502/3493/26228/3119/925/2205/1380/974/79931/92747/3115/115352/5581/9214/91543/57402/5284/54900/958/3932/9111/257101/7100/7531/58484/57142/1378/11126/917/916/10384/131450/8631/54941/81793/29760/55024/2213/640/3500/931/933/930/971/3507/3958
CC	GO:0098590	plasma membrane region	471	0.228145	2.04249	3.45252e-07	1.31637e-05	9.27413e-06	3387	tags=60%	list=45%	signal=35%	57126/26119/55061/259266/88/7039/3680/1803/4680/8972/84628/960/4008/7018/192668/1269/4771/60676/925/6401/140/55600/9249/177/712/115352/23035/10395/340273/29881/7049/10207/9829/6711/583/540/26751/245972/9378/2060/23499/9699/4070/9627/1832/10507/5586/5337/5031/2780/26052/22920/30845/6513/3814/6900/84966/83442/23550/50649/4921/6518/1378/3953/8394/9890/339453/5590/374291/340547/8631/284119/81831/6407…
BP	GO:0019731	antibacterial humoral response	25	0.599586	2.82374	3.637e-07	1.37636e-05	9.69677e-06	1844	tags=80%	list=25%	signal=61%	7018/3502/3493/1991/1511/1669/3500/3507/51297/3512/283/133/820/6038/10417/4316/3494/671/8346/8347
BP	GO:0051174	regulation of phosphorus metabolic process	298	0.256169	2.2116	3.79142e-07	1.42417e-05	1.00336e-05	2207	tags=45%	list=29%	signal=33%	2200/9928/7039/2261/100133941/10125/344/7018/1236/26228/55600/183/26585/2069/177/2321/54541/63967/978/995/10178/28951/54206/824/9451/84879/3791/84722/84676/8503/79888/10507/595/2192/5031/64793/8784/245711/116496/4921/3953/57103/23381/5590/916/1116/1991/4318/6774/2887/1647/920/55022/55024/7448/27010/2810/3624/84830/22943/6423/116/22974/3479/1033/3976/117/1908/9088/374/3815/5783/100506658/285489/97…
BP	GO:0002456	T cell mediated immunity	63	0.431719	2.76818	3.86971e-07	1.44289e-05	1.01655e-05	881	tags=37%	list=12%	signal=32%	911/149233/3575/11118/2625/8809/925/1380/177/3554/91543/6504/3122/7292/3140/5551/100507436/1604/1378/910/5590/10384/2213
BP	GO:0002683	negative regulation of immune system process	260	0.271377	2.30733	3.92635e-07	1.45332e-05	1.0239e-05	1823	tags=40%	list=24%	signal=31%	2200/55061/9173/5320/11240/53347/4681/1803/4068/10225/257144/3575/9404/56253/1269/26228/1380/26585/92747/115352/3142/2840/9636/11326/3111/6504/54900/7292/9111/81607/8764/8654/3162/7531/100507436/1604/1378/63976/11126/131450/1511/54941/335/55024/2213/933/971/2/710/3958/2810/3624/84830/54/6664/2150/23495/100313774/3112/1268/384/972/7057/6347/4192/5553/8530/151176/3821/5648/64115/55824/6387/652/4254…
BP	GO:0002685	regulation of leukocyte migration	92	0.379851	2.68738	3.97122e-07	1.45928e-05	1.0281e-05	1367	tags=42%	list=18%	signal=35%	80310/11240/4681/1803/257144/1236/26228/6401/26585/177/3552/3554/3576/57402/6504/6403/8764/3162/8784/57142/1907/131450/1991/23075/10563/3958/84830/1908/2150/10894/972/7057/6347/7423/4192/3579/6387/4254/5919
BP	GO:0070374	positive regulation of ERK1 and ERK2 cascade	67	0.425955	2.7853	4.14429e-07	1.51192e-05	1.06518e-05	1360	tags=46%	list=18%	signal=38%	80310/5320/2261/960/1236/8685/177/3552/57007/6504/1880/9378/3791/5031/4921/6464/5590/1116/920/5345/2266/3624/116/3479/2150/972/7010/7423/6764/652/5156
BP	GO:0022402	cell cycle process	475	0.231809	2.07745	4.21504e-07	1.52675e-05	1.07563e-05	1949	tags=37%	list=26%	signal=29%	6241/128239/699/259266/4774/1058/9928/7039/8556/940/645121/6419/51176/55125/55159/1731/91782/146909/57492/57405/7153/9787/7272/4751/332/4288/2069/8110/54443/643/9493/11130/26586/27030/5581/3552/274/63967/6711/2273/26227/995/6905/10540/8900/4998/23397/605/1063/164045/11004/79000/51514/8462/9639/25909/49860/10806/84722/23175/348654/57448/5586/595/51100/1104/91/5339/84944/64793/245711/1639/10269/295…
BP	GO:0010562	positive regulation of phosphorus metabolic process	186	0.301513	2.45017	4.50605e-07	1.59792e-05	1.12577e-05	1543	tags=39%	list=21%	signal=32%	2200/9928/7039/2261/100133941/10125/344/7018/1236/55600/26585/2069/177/2321/63967/10178/824/3791/84722/8503/10507/595/5031/8784/245711/116496/4921/3953/57103/916/1116/1991/4318/2887/920/55022/55024/7448/84830/6423/116/22974/3479/3976/117/1908/374/3815/285489/972/7057/7010/7423/283/4923/2252/23682/9770/5745/2674/28984/652/4254/5919/57214/221395/5217/5159/6091/10211/7098/27040
BP	GO:0045937	positive regulation of phosphate metabolic process	186	0.301513	2.45017	4.50605e-07	1.59792e-05	1.12577e-05	1543	tags=39%	list=21%	signal=32%	2200/9928/7039/2261/100133941/10125/344/7018/1236/55600/26585/2069/177/2321/63967/10178/824/3791/84722/8503/10507/595/5031/8784/245711/116496/4921/3953/57103/916/1116/1991/4318/2887/920/55022/55024/7448/84830/6423/116/22974/3479/3976/117/1908/374/3815/285489/972/7057/7010/7423/283/4923/2252/23682/9770/5745/2674/28984/652/4254/5919/57214/221395/5217/5159/6091/10211/7098/27040
BP	GO:0007167	enzyme-linked receptor protein signaling pathway	355	0.248672	2.17096	4.47004e-07	1.59792e-05	1.12577e-05	1504	tags=33%	list=20%	signal=28%	2200/4774/80310/7039/2261/50852/4681/51176/23484/79652/116844/9404/2625/26228/7272/925/3725/183/26585/51237/2069/2321/5792/54541/7049/6711/5284/51738/54206/9378/3932/3716/6272/9451/3791/10628/8425/8503/84058/91/2051/2662/9860/57142/4921/6464/63976/238/10256/5590/388581/916/9241/53918/4318/6774/2887/920/55022/29760/640/7448/3485/10468/83891/1311/3624/55816/22943/6423/3479/3976/1288/6664/64399/2592…
BP	GO:0006956	complement activation	37	0.536311	2.93546	4.64265e-07	1.63492e-05	1.15184e-05	2942	tags=89%	list=39%	signal=55%	55061/1191/716/3502/3493/922/1380/712/11326/3075/1604/1378/1675/3500/715/2/710/713/5648/28984/3426/3494/10747/8547/731/732/10878/10877/3080/81494/722/1379/4179
MF	GO:0030234	enzyme regulator activity	484	0.222843	2.00318	5.15117e-07	1.80149e-05	1.26919e-05	1703	tags=32%	list=23%	signal=27%	25780/11123/55103/55635/128239/7039/100133941/9806/10125/645121/939/6815/84079/9882/266747/344/5265/306/26228/332/3725/183/26585/2069/65979/57480/10395/143872/79961/5581/274/5176/4688/462/3699/51738/58504/28951/89781/8900/54920/54206/3932/9644/23263/842/9639/128272/23179/10628/6004/8503/57448/595/1104/2192/2662/8434/8575/221476/9938/57449/163259/245711/9462/9910/2981/5877/58484/307/23550/50649/10…
BP	GO:0006935	chemotaxis	173	0.304828	2.44363	5.31059e-07	1.81959e-05	1.28194e-05	1534	tags=39%	list=20%	signal=32%	80310/1901/11240/3680/4681/1803/51176/1236/1269/26228/26585/643/177/2321/3576/57402/57007/6361/6504/1880/3791/10507/5337/5339/57449/1907/8394/1991/1511/1669/335/23075/6362/10563/9023/3958/6374/6367/1908/2150/8061/5197/3730/3815/91584/6368/5365/972/7057/2022/6347/7423/4192/3579/60675/2252/6387/652/5156/5919/9037/10512/11251/1012/5159/1237/6091/4283
BP	GO:0042330	taxis	173	0.304828	2.44363	5.31059e-07	1.81959e-05	1.28194e-05	1534	tags=39%	list=20%	signal=32%	80310/1901/11240/3680/4681/1803/51176/1236/1269/26228/26585/643/177/2321/3576/57402/57007/6361/6504/1880/3791/10507/5337/5339/57449/1907/8394/1991/1511/1669/335/23075/6362/10563/9023/3958/6374/6367/1908/2150/8061/5197/3730/3815/91584/6368/5365/972/7057/2022/6347/7423/4192/3579/60675/2252/6387/652/5156/5919/9037/10512/11251/1012/5159/1237/6091/4283
BP	GO:0000278	mitotic cell cycle	336	0.252458	2.1952	5.24155e-07	1.81959e-05	1.28194e-05	1949	tags=38%	list=26%	signal=30%	6241/128239/699/4774/1058/9928/7039/8556/940/645121/6419/55125/55159/91782/146909/57492/57405/9787/7272/4751/332/4288/2069/8110/54443/9493/11130/26586/3552/63967/6711/2273/995/6905/10540/8900/4998/23397/605/1063/11004/51514/8462/9639/84722/23175/348654/5586/595/1104/91/7531/64793/7161/245711/1639/10269/25949/4921/7015/114327/51339/79866/5888/10112/3624/55872/983/220134/22974/3479/1033/1908/10381/…
BP	GO:1902533	positive regulation of intracellular signal transduction	394	0.241875	2.13072	5.57688e-07	1.89801e-05	1.33719e-05	1383	tags=29%	list=18%	signal=25%	128239/80310/5320/7039/2261/100133941/940/50852/10125/939/10913/960/1236/1191/2625/219790/8809/7272/8685/332/183/26585/1687/177/2321/4919/115352/57708/5581/7049/6574/3552/79971/91543/57007/51738/10178/7188/6504/958/1880/9378/3932/23263/9111/55252/3791/137735/7068/348654/6403/10507/3162/8575/5031/7531/57449/7161/3814/57142/1907/10542/4921/23261/6464/5590/388581/916/959/1116/1991/6774/1647/920/1000…
BP	GO:0051302	regulation of cell division	87	0.384866	2.69006	5.68493e-07	1.92188e-05	1.35401e-05	1903	tags=52%	list=25%	signal=39%	259266/9928/80310/7039/8556/146909/332/2069/643/9493/5581/3552/25909/10628/57448/5586/51100/26009/114327/4300/79848/10112/2810/6423/55143/7423/4192/79733/2254/2252/28514/90293/11091/847/27183/11113/990/5347/346389/29127/57325/10474/675/6871/9212
BP	GO:0140014	mitotic nuclear division	129	0.342369	2.59998	5.99398e-07	2.01294e-05	1.41816e-05	2073	tags=49%	list=28%	signal=36%	699/4774/9928/7039/8556/940/55125/91782/146909/57405/9787/7272/4751/332/4288/2069/54443/9493/11130/3552/995/10540/23397/1063/11004/9639/84722/348654/1104/64793/79866/983/220134/22974/3479/1908/9088/11065/144165/55143/28984/652/7283/157313/3833/5159/3835/27183/9700/51510/9319/5347/54892/29127/3832/24137/8881/701/9212/7273/54998/49856/10459
BP	GO:0002263	cell activation involved in immune response	136	0.330542	2.54151	6.14375e-07	2.03627e-05	1.4346e-05	905	tags=28%	list=12%	signal=25%	57126/4063/911/149233/940/29851/10125/9452/51176/6571/2625/306/4064/8809/6097/2205/5581/3142/6504/958/1880/3122/3716/7292/9111/257101/117157/8291/2956/1378/11126/5590/959/6774/2213/23075/5450/930
BP	GO:0002366	leukocyte activation involved in immune response	136	0.330542	2.54151	6.14375e-07	2.03627e-05	1.4346e-05	905	tags=28%	list=12%	signal=25%	57126/4063/911/149233/940/29851/10125/9452/51176/6571/2625/306/4064/8809/6097/2205/5581/3142/6504/958/1880/3122/3716/7292/9111/257101/117157/8291/2956/1378/11126/5590/959/6774/2213/23075/5450/930
BP	GO:0002274	myeloid leukocyte activation	99	0.367381	2.64398	6.22202e-07	2.04882e-05	1.44344e-05	1871	tags=48%	list=25%	signal=37%	914/57126/9173/5320/10125/6571/1191/4317/1269/306/26228/2205/177/712/5581/3576/11326/6504/8807/9111/8291/1907/55013/1511/2213/2150/3815/1268/972/7057/3579/8530/820/1075/221395/10538/10202/7098/27040/301/671/146722/814/3603/3949/403313/7097/4615
MF	GO:0004984	olfactory receptor activity	57	0.449912	2.78384	6.69108e-07	2.16118e-05	1.5226e-05	3089	tags=84%	list=41%	signal=50%	79290/391107/391192/390072/56656/128360/391109/343406/391112/128366/128367/128368/81448/391114/128371/128372/81442/441911/26476/127385/127623/81472/81470/81469/441933/343169/26188/284532/391189/343171/391191/81466/26246/284521/127059/391194/127062/391195/127064/391196/127066/127074/254879/26696/391211/127069/127077/401994
BP	GO:0050911	detection of chemical stimulus involved in sensory perception of smell	57	0.449912	2.78384	6.69108e-07	2.16118e-05	1.5226e-05	3089	tags=84%	list=41%	signal=50%	79290/391107/391192/390072/56656/128360/391109/343406/391112/128366/128367/128368/81448/391114/128371/128372/81442/441911/26476/127385/127623/81472/81470/81469/441933/343169/26188/284532/391189/343171/391191/81466/26246/284521/127059/391194/127062/391195/127064/391196/127066/127074/254879/26696/391211/127069/127077/401994
BP	GO:1904018	positive regulation of vasculature development	71	0.411105	2.70141	6.66719e-07	2.16118e-05	1.5226e-05	1686	tags=54%	list=22%	signal=42%	116844/306/26585/1545/2321/3552/3576/51738/958/3716/10352/3791/3162/57142/7015/1116/6774/10000/6423/7082/1990/7057/7010/2022/7423/4192/3579/133/820/6387/28514/7291/9037/4086/7098/2627/2041/126259
BP	GO:0048285	organelle fission	201	0.293161	2.40725	7.52517e-07	2.4152e-05	1.70156e-05	1948	tags=42%	list=26%	signal=32%	699/259266/4774/9928/7039/8556/940/55125/1731/91782/146909/57405/7153/9787/7272/4751/332/4288/2069/54443/9493/11130/27030/3552/995/10540/8900/23397/1063/164045/11004/9639/3791/84722/348654/1104/84944/64793/245711/80821/22887/79866/122402/5888/983/220134/84057/22974/3479/3976/1908/9088/11065/144165/55143/124535/28984/652/7283/157313/3833/7589/5159/5892/3835/6773/27183/9700/51510/9232/9319/23259/53…
CC	GO:0030665	clathrin-coated vesicle membrane	54	0.447898	2.73539	7.83099e-07	2.49754e-05	1.75957e-05	1224	tags=46%	list=16%	signal=39%	26119/7039/3575/7018/6571/915/3119/2069/3115/3118/3117/155066/3122/284697/917/55707/920/3120/140679/374/3127/3113/28988/9026/972
BP	GO:0032609	type II interferon production	51	0.467596	2.82276	8.28339e-07	2.60901e-05	1.83811e-05	779	tags=37%	list=10%	signal=34%	914/9173/149233/10225/11118/1236/2625/56253/8809/3115/3554/9636/6504/7292/257101/1378/11126/3595/916
BP	GO:0032649	regulation of type II interferon production	51	0.467596	2.82276	8.28339e-07	2.60901e-05	1.83811e-05	779	tags=37%	list=10%	signal=34%	914/9173/149233/10225/11118/1236/2625/56253/8809/3115/3554/9636/6504/7292/257101/1378/11126/3595/916
BP	GO:0002495	antigen processing and presentation of peptide antigen via MHC class II	19	0.653885	2.79692	8.4114e-07	2.63298e-05	1.85499e-05	1224	tags=74%	list=16%	signal=62%	3119/3115/3118/3117/3111/3122/55016/2213/3120/3127/3108/3112/3113/972
BP	GO:0051726	regulation of cell cycle	401	0.233509	2.06038	9.15535e-07	2.84827e-05	2.00667e-05	1949	tags=37%	list=26%	signal=29%	6241/699/259266/9928/7039/8556/940/6419/51176/55159/55249/91782/2625/57492/57405/4771/9787/7272/4751/332/4288/3725/115572/2069/8110/54443/643/9493/65979/11130/5581/3552/274/63967/2273/995/4998/23397/605/1063/11004/51514/8462/7159/25909/49860/84722/348654/57448/87178/5586/595/51100/26009/1104/7531/64793/7161/1639/10269/25949/4921/7709/7015/10669/4656/51339/79848/6774/91768/1647/79866/5888/10112/28…
BP	GO:0002699	positive regulation of immune effector process	109	0.35149	2.57471	1.09624e-06	3.38965e-05	2.38809e-05	719	tags=27%	list=10%	signal=24%	57126/911/149233/940/4068/10125/2625/56253/26228/8809/51237/3554/91543/3142/5443/6504/958/8807/3122/7292/3140/8764/117157/1604/57142/1378/910/11126/5590
BP	GO:0045580	regulation of T cell differentiation	85	0.382996	2.65532	1.12793e-06	3.4665e-05	2.44223e-05	1688	tags=46%	list=22%	signal=36%	914/149233/940/10125/939/51176/3575/9840/2625/56253/57492/9760/3574/9308/3142/8808/3111/3122/7292/257101/639/2736/1378/5590/6932/8876/57630/972/4192/64115/652/10538/3135/6935/301/2737/6604/814/30009
BP	GO:0001910	regulation of leukocyte mediated cytotoxicity	41	0.493962	2.78152	1.26127e-06	3.82989e-05	2.69824e-05	716	tags=39%	list=10%	signal=35%	911/149233/4068/10125/3575/56253/26228/177/5443/8807/3122/81607/3140/100507436/910/11126
BP	GO:0045766	positive regulation of angiogenesis	70	0.406557	2.67452	1.25955e-06	3.82989e-05	2.69824e-05	1686	tags=53%	list=22%	signal=41%	116844/306/26585/1545/2321/3552/3576/51738/958/3716/10352/3791/3162/57142/7015/1116/6774/10000/6423/7082/1990/7057/7010/2022/7423/4192/3579/133/820/28514/7291/9037/4086/7098/2627/2041/126259
BP	GO:0071495	cellular response to endogenous stimulus	452	0.223937	1.99508	1.2749e-06	3.84821e-05	2.71115e-05	1868	tags=36%	list=25%	signal=29%	2200/4774/80310/88/11240/2261/4681/51176/23484/79652/9882/960/7357/116844/9404/2625/57492/3725/183/26585/51237/9249/1545/2321/54541/5581/7049/5176/3576/5732/51738/583/7538/54206/9378/3716/7292/842/6272/9734/3791/7068/23175/8425/8503/91/2662/5031/8648/1996/10269/4921/3953/57103/64754/6464/63976/238/4656/5590/51542/388581/256297/57498/164091/8195/9241/53918/1385/6774/2887/55022/7448/3485/10468/8389…
MF	GO:0005509	calcium ion binding	236	0.271734	2.29095	1.41888e-06	4.23244e-05	2.98185e-05	2879	tags=56%	list=38%	signal=35%	25780/2200/5320/88/249/777/11240/9806/10125/57134/716/306/728113/6274/55600/374955/4811/53353/6282/57402/9378/2060/824/23499/49860/8425/79888/6403/9813/2192/5551/2820/3339/90342/30845/845/130106/8291/307/29957/10669/114327/1823/2934/54885/9620/23075/715/84698/27445/1311/5101/30846/7163/23413/83543/7429/11328/7057/219621/54510/5648/56975/2201/4147/28514/1000/79987/23158/55033/1012/1951/5624/301/65…
BP	GO:0048646	anatomical structure formation involved in morphogenesis	452	0.223438	1.99064	1.41179e-06	4.23244e-05	2.98185e-05	1617	tags=33%	list=22%	signal=27%	5738/1901/88/7039/51176/10913/116844/57125/90625/2625/4317/306/4771/26585/2069/65979/1545/2321/3914/51330/10395/7049/3552/79971/5176/3576/6711/57007/51738/58504/80206/688/958/9378/9644/3716/842/84172/824/9451/9734/963/10352/3791/10806/5784/157506/8503/2034/5339/8434/3162/3339/27245/2736/4703/57142/1907/3953/7015/6464/4656/11126/256297/576/9241/23059/7289/1116/4318/6774/1647/10000/5613/55333/9620/…
BP	GO:0000819	sister chromatid segregation	106	0.344512	2.50326	1.51409e-06	4.49002e-05	3.16332e-05	1948	tags=48%	list=26%	signal=36%	699/9928/55125/91782/146909/57492/57405/7153/9787/7272/4751/332/8110/9493/11130/10540/23397/605/1063/11004/9639/84722/348654/1104/983/220134/22974/11065/144165/55143/7283/57520/3833/3835/27183/9700/51510/6604/9319/990/5347/54892/29127/3832/24137/64682/116028/8881/701/9212/7273
CC	GO:0043235	receptor complex	188	0.293939	2.39478	1.52821e-06	4.50555e-05	3.17426e-05	1393	tags=34%	list=19%	signal=28%	149233/163702/2261/3680/50852/919/28639/960/57125/7018/915/8809/925/55600/1380/974/93145/2321/83416/4919/7049/53353/5284/7188/958/8807/83756/3791/10507/91/10154/4921/3953/238/8515/3595/917/923/28683/916/131450/8631/920/81793/2556/3507/117/118427/53831/3815/2050/4973/91584/5365/972/7010/2022/3821/28669/5745/2674/5156/8516
BP	GO:0031343	positive regulation of cell killing	32	0.541137	2.82212	1.65341e-06	4.84651e-05	3.41447e-05	716	tags=44%	list=10%	signal=40%	911/149233/4068/10125/56253/26228/922/5443/8807/3122/3140/5551/910/11126
CC	GO:0005774	vacuolar membrane	186	0.291323	2.36736	1.69917e-06	4.95202e-05	3.48881e-05	2275	tags=49%	list=30%	signal=35%	1803/4680/80342/91782/154664/1183/80183/3119/3115/51257/3118/9214/3117/5284/3111/245972/155066/89781/3122/6272/4948/245973/79888/55016/51100/57535/5337/127124/23334/10542/987/910/440738/23400/54896/23120/81615/1088/7782/55361/3120/3127/283537/206358/8876/3108/3112/3113/100506658/972/64116/120224/353189/2040/967/10211/29919/64114/7098/64798/1184/25851/27183/8774/8904/8519/51510/162/55255/96459/558…
BP	GO:0002757	immune response-activating signaling pathway	233	0.272257	2.28531	1.81661e-06	5.26401e-05	3.70861e-05	957	tags=25%	list=13%	signal=23%	940/53347/3702/50852/4068/919/387357/28639/257144/9840/80342/3514/9404/11118/1236/915/2625/3502/3493/26228/3119/925/1380/974/79931/92747/3115/115352/5581/9214/91543/57402/54900/3932/9111/257101/7100/7531/58484/57142/1378/11126/917/916/10384/8631/54941/81793/29760/55024/2213/640/3500/931/933/930/971/3507/3958
BP	GO:0097529	myeloid leukocyte migration	92	0.363777	2.57366	1.94916e-06	5.61601e-05	3.9566e-05	1367	tags=41%	list=18%	signal=34%	57126/80310/3680/4681/1803/1236/26228/26585/177/2321/255231/3552/3554/3576/57402/6504/57142/1907/131450/1511/23075/10563/3958/6374/6367/1908/5197/3815/6368/972/7057/6347/7423/4192/3579/6387/4254/5919
BP	GO:0009887	animal organ morphogenesis	369	0.236082	2.06589	1.97769e-06	5.63419e-05	3.96941e-05	1668	tags=35%	list=22%	signal=29%	2200/1901/7039/249/2261/51176/10913/64919/2625/3983/4771/60676/183/26585/2069/9249/65979/3574/10395/7049/79971/7088/3142/2273/583/54206/639/55252/84879/3791/7068/4070/157506/3399/1832/83452/8575/2780/83931/27245/10269/2736/57142/2016/431707/256297/1855/8195/9241/3212/26249/23059/7289/6774/158326/10000/5613/9620/1875/10468/220/1311/1295/5950/3624/170690/22943/54/6423/3976/6664/64399/64478/25928/11…
BP	GO:0045087	innate immune response	391	0.230502	2.02941	1.97769e-06	5.63419e-05	3.96941e-05	2773	tags=50%	list=37%	signal=33%	914/57126/4063/55061/149233/163702/4068/10225/10125/3434/10321/80342/1191/2625/716/56253/4064/8685/1380/79931/2069/92747/712/51257/115352/5581/255231/91543/4688/8808/57402/9636/11326/10623/6504/958/54920/8807/3716/9111/257101/639/2635/81607/7100/84676/6675/3075/3140/8764/117157/8575/7531/100507436/1604/58484/57142/1378/11126/1675/923/9868/1669/2934/54941/81793/337/2213/715/84329/3263/2/710/3507/5…
BP	GO:0098657	import into cell	327	0.24392	2.11744	2.01208e-06	5.70015e-05	4.01588e-05	1879	tags=38%	list=25%	signal=30%	57126/26119/55061/777/1803/55423/344/154664/7018/6571/1191/306/26228/6401/8685/6614/26585/4648/51257/5581/53353/9214/274/3576/9829/4688/22848/57007/6504/2060/3772/6382/824/6272/5861/84058/5031/9938/284697/26052/9910/3339/30845/6513/6900/8291/6518/3953/8394/1261/165530/55707/8645/1991/2934/335/55333/2213/931/7448/933/4430/5026/3958/22943/3773/28965/8867/197/2150/10894/208/3759/6565/206358/30846/28…
BP	GO:0098813	nuclear chromosome segregation	137	0.318938	2.45442	2.0594e-06	5.80179e-05	4.08749e-05	1948	tags=45%	list=26%	signal=34%	699/259266/9928/55125/1731/91782/146909/57492/57405/7153/9787/7272/4751/332/8110/9493/11130/27030/10540/23397/605/1063/11004/9639/84722/348654/1104/84944/245711/51112/983/220134/84057/22974/11065/144165/55143/7283/57520/3833/3835/27183/9700/51510/6604/9232/9319/990/5347/54892/29127/3832/4439/81610/24137/64682/116028/8881/701/9212/151648/7273
BP	GO:0045619	regulation of lymphocyte differentiation	99	0.356041	2.56237	2.07948e-06	5.82599e-05	4.10454e-05	1786	tags=45%	list=24%	signal=35%	914/149233/940/10125/939/51176/3575/9840/2625/56253/57492/9760/3574/115352/9308/3142/8808/3111/3122/7292/257101/639/2736/1378/5590/6932/3624/8876/57630/972/4192/22806/64115/652/8993/10538/3135/6935/301/2737/6604/814/30009/3601/2033
BP	GO:0050853	B cell receptor signaling pathway	46	0.466046	2.72415	2.24707e-06	6.26092e-05	4.41096e-05	948	tags=46%	list=13%	signal=40%	3702/257144/3514/9404/3502/3493/26228/974/115352/9214/3932/29760/55024/2213/640/3500/931/933/930/971/3507
CC	GO:0042581	specific granule	70	0.398444	2.62115	2.41902e-06	6.7032e-05	4.72255e-05	1596	tags=49%	list=21%	signal=39%	1118/57126/79895/3240/10321/116844/4317/306/2352/963/5337/25797/8514/6518/1116/1991/932/1669/6947/1088/10562/84329/5005/53831/4973/3608/353189/820/2040/8993/30/64114/671/4069
BP	GO:0046632	alpha-beta T cell differentiation	69	0.403424	2.64832	2.49403e-06	6.87349e-05	4.84253e-05	410	tags=28%	list=5%	signal=26%	4063/149233/29851/3702/51176/64919/2625/8809/6097/9760/9308/91543/3142/1880/3122/3716/7292/257101/639
BP	GO:0070371	ERK1 and ERK2 cascade	111	0.342294	2.51638	2.52574e-06	6.92324e-05	4.87758e-05	1498	tags=41%	list=20%	signal=33%	128239/80310/5320/2261/10125/6815/960/7018/1236/8685/177/3552/57007/6504/1880/9378/3791/2192/5031/4921/6464/5590/1116/2887/920/55333/5345/2266/3624/8000/983/116/3479/3976/2150/972/7010/7423/6764/10252/652/5156/1739/5159/10251
BP	GO:0002040	sprouting angiogenesis	49	0.463387	2.75249	2.59583e-06	6.97057e-05	4.91092e-05	1580	tags=57%	list=21%	signal=45%	51176/26585/2321/7049/51738/3716/9734/3791/8503/8434/3162/57142/10000/55333/84830/7082/2050/7057/7010/7423/79733/652/28514/9037/1012/6091/4086/301
BP	GO:0019886	antigen processing and presentation of exogenous peptide antigen via MHC class II	18	0.639195	2.67868	2.59799e-06	6.97057e-05	4.91092e-05	1224	tags=72%	list=16%	signal=61%	3119/3115/3118/3117/3111/3122/2213/3120/3127/3108/3112/3113/972
BP	GO:0002237	response to molecule of bacterial origin	150	0.314806	2.46072	2.57166e-06	6.97057e-05	4.91092e-05	1644	tags=40%	list=22%	signal=32%	149233/249/4353/100133941/10225/1236/4317/1269/4064/26228/6401/8564/79931/5581/3552/274/3576/57402/5732/129607/7538/958/7292/842/2635/824/7100/6403/1604/3595/923/1991/1511/1669/4318/81793/2213/10563/6374/1734/54/23641/5197/1268/1869/6347/133/820/4314/445/10417/1051/4129/6833/4283/26273/671/4795/51510/5734
BP	GO:0007186	G protein-coupled receptor signaling pathway	333	0.240125	2.08606	2.56238e-06	6.97057e-05	4.91092e-05	3160	tags=59%	list=42%	signal=36%	1901/88/11240/1236/1269/6401/140/8685/183/2069/643/79290/3576/2840/57007/5732/51738/5443/10178/2791/1880/9378/83756/9934/23683/6272/9699/6004/5031/2780/3814/391107/6900/391192/3352/9890/238/51542/576/5996/916/7289/335/9620/11247/6362/1081/8843/116/117/6367/5368/2150/374/53831/1268/6368/6347/4923/3579/133/60675/390072/5575/5029/5745/8490/6387/5997/11251/51083/2535/221395/5159/26996/1237/6091/2775/…
BP	GO:0007088	regulation of mitotic nuclear division	60	0.422051	2.66261	2.63815e-06	7.00422e-05	4.93463e-05	2073	tags=58%	list=28%	signal=43%	699/7039/940/57405/9787/7272/4751/332/4288/2069/11130/3552/995/1063/348654/1104/79866/220134/3479/1908/9088/11065/55143/28984/652/157313/5159/9700/9319/5347/8881/701/9212/54998/10459
CC	GO:0030666	endocytic vesicle membrane	81	0.380477	2.60494	2.63561e-06	7.00422e-05	4.93463e-05	1581	tags=46%	list=21%	signal=36%	26119/7039/3575/7018/915/306/3119/817/8685/2069/3115/3118/79971/3117/245972/155066/3122/284697/917/920/84329/3120/9332/374/3127/6565/3113/972/23682/285195/81035/2535/10981/8976/3135/2892/10890
CC	GO:0045334	clathrin-coated endocytic vesicle	38	0.502222	2.76309	2.65914e-06	7.02317e-05	4.94798e-05	1457	tags=55%	list=19%	signal=45%	26119/7039/3575/7018/915/3119/2069/3115/3118/3117/3122/284697/917/920/3120/374/3127/3113/972/2535/57214
BP	GO:0042327	positive regulation of phosphorylation	164	0.301436	2.39696	2.74103e-06	7.20195e-05	5.07394e-05	1543	tags=38%	list=21%	signal=31%	2200/9928/7039/2261/100133941/10125/7018/1236/55600/26585/2069/177/2321/63967/10178/3791/84722/8503/10507/595/8784/245711/116496/4921/3953/57103/916/1116/1991/4318/2887/920/55024/7448/84830/6423/116/22974/3479/3976/1908/374/3815/285489/972/7057/7010/7423/283/2252/9770/2674/28984/652/4254/5919/57214/5217/5159/6091/10211/7098/27040
CC	GO:0005765	lysosomal membrane	174	0.292255	2.3455	2.80518e-06	7.2949e-05	5.13942e-05	2275	tags=49%	list=30%	signal=35%	1803/4680/80342/91782/154664/1183/3119/3115/51257/3118/9214/3117/5284/3111/245972/155066/89781/3122/6272/4948/245973/79888/55016/57535/5337/23334/10542/987/910/23400/54896/23120/81615/1088/7782/55361/3120/3127/283537/206358/8876/3108/3112/3113/100506658/972/64116/120224/353189/2040/967/10211/29919/64114/7098/64798/1184/25851/8774/8904/8519/51510/162/55255/96459/55858/81552/3949/79726/2782/6009/53…
CC	GO:0098852	lytic vacuole membrane	174	0.292255	2.3455	2.80518e-06	7.2949e-05	5.13942e-05	2275	tags=49%	list=30%	signal=35%	1803/4680/80342/91782/154664/1183/3119/3115/51257/3118/9214/3117/5284/3111/245972/155066/89781/3122/6272/4948/245973/79888/55016/57535/5337/23334/10542/987/910/23400/54896/23120/81615/1088/7782/55361/3120/3127/283537/206358/8876/3108/3112/3113/100506658/972/64116/120224/353189/2040/967/10211/29919/64114/7098/64798/1184/25851/8774/8904/8519/51510/162/55255/96459/55858/81552/3949/79726/2782/6009/53…
BP	GO:0019220	regulation of phosphate metabolic process	297	0.254675	2.19872	3.07829e-06	7.96429e-05	5.61102e-05	2207	tags=44%	list=29%	signal=33%	2200/9928/7039/2261/100133941/10125/344/7018/1236/26228/55600/183/26585/2069/177/2321/54541/63967/978/995/10178/28951/54206/824/9451/84879/3791/84722/84676/8503/79888/10507/595/2192/5031/64793/8784/245711/116496/4921/3953/57103/23381/5590/916/1116/1991/4318/6774/2887/1647/920/55022/55024/7448/27010/2810/3624/84830/22943/6423/116/22974/3479/1033/3976/117/1908/9088/374/3815/5783/100506658/285489/97…
BP	GO:1901342	regulation of vasculature development	124	0.329462	2.48324	3.10889e-06	8.00262e-05	5.63803e-05	2959	tags=65%	list=39%	signal=40%	116844/306/26585/1545/2321/3552/5176/3576/51738/958/3716/10352/3791/8434/3162/3339/57142/7015/6464/11126/576/1116/6774/1647/10000/55333/10563/6423/350/7082/1990/7057/7010/2022/7423/4192/3579/133/820/9510/6387/28984/28514/7291/9037/23554/6050/4086/6833/3135/7098/2534/2627/2041/126259/3315/4914/5293/10218/4879/1969/1870/80149/7075/27329/2152/84432/204851/1893/4881/1944/1942/64218/128240/127385/356/…
BP	GO:0042325	regulation of phosphorylation	243	0.263508	2.23181	3.22877e-06	8.26924e-05	5.82586e-05	1549	tags=35%	list=21%	signal=29%	2200/9928/7039/2261/100133941/10125/7018/1236/26228/55600/183/26585/2069/177/2321/63967/995/10178/28951/54206/9451/3791/84722/8503/10507/595/2192/64793/8784/245711/116496/4921/3953/57103/5590/916/1116/1991/4318/2887/1647/920/55022/55024/7448/2810/3624/84830/22943/6423/116/22974/3479/1033/3976/1908/9088/374/3815/5783/100506658/285489/972/7057/7010/2022/7423/283/2252/9770/2674/28984/652/4254/5919/7…
CC	GO:0016442	RISC complex	32	-0.421132	-2.85559	3.27216e-06	8.33825e-05	5.87448e-05	2675	tags=81%	list=36%	signal=53%	407009/55384/407013/167227/100423003/693137/407033/400931/442915/768213/406918/100313843/100302281/693185/693135/693160/693162/406959/406977/442904/100126340/406960/57510/406986/406991/84981
BP	GO:0030595	leukocyte chemotaxis	92	0.359482	2.54327	3.29714e-06	8.3599e-05	5.88973e-05	1367	tags=41%	list=18%	signal=34%	1901/11240/3680/4681/1803/1236/1269/26228/26585/643/2321/3576/57402/6504/1880/5339/1907/1511/1669/23075/10563/9023/3958/6374/6367/1908/2150/5197/3815/6368/972/7057/6347/7423/4192/3579/6387/5919
BP	GO:0016064	immunoglobulin mediated immune response	77	0.381868	2.56937	3.33481e-06	8.41336e-05	5.9274e-05	995	tags=36%	list=13%	signal=32%	55061/940/939/100423062/3514/1191/716/3502/3493/2205/1380/712/9214/958/7292/1604/2956/1378/959/2213/3500/23075/715/930/3538/3263/710/713
BP	GO:0032496	response to lipopolysaccharide	144	0.310382	2.40526	3.3619e-06	8.4397e-05	5.94596e-05	1644	tags=40%	list=22%	signal=32%	149233/249/4353/10225/1236/4317/1269/4064/26228/6401/8564/79931/5581/3552/274/3576/57402/5732/129607/7538/958/7292/842/2635/824/7100/6403/1604/3595/923/1991/1511/1669/4318/10563/6374/1734/54/23641/5197/1268/1869/6347/133/820/4314/445/10417/1051/4129/6833/4283/26273/671/4795/51510/5734
BP	GO:0001932	regulation of protein phosphorylation	223	0.26408	2.20547	3.58161e-06	8.94698e-05	6.30334e-05	1725	tags=38%	list=23%	signal=30%	2200/9928/7039/2261/100133941/10125/1236/55600/183/26585/2069/177/2321/63967/995/10178/28951/54206/9451/3791/84722/8503/10507/595/2192/64793/8784/245711/116496/4921/3953/5590/916/1116/1991/4318/1647/920/55022/55024/7448/2810/84830/22943/6423/116/22974/3479/1033/3976/1908/9088/374/3815/5783/100506658/285489/972/7057/7010/7423/2252/9770/2674/28984/652/4254/5919/79899/5997/57214/5217/5159/6091/10211…
BP	GO:1901698	response to nitrogen compound	389	0.229982	2.02418	3.62927e-06	8.97758e-05	6.3249e-05	2193	tags=42%	list=29%	signal=31%	2200/88/249/2261/23484/9882/3434/57134/6571/1236/1269/57492/183/53335/51237/2069/177/1545/2321/1036/5581/93611/7049/2947/978/51738/5443/958/54206/3716/7292/6382/6272/118424/57463/9734/3791/10628/23175/6429/8503/87178/2662/5031/8648/1996/845/6513/4921/6464/57657/238/1261/5590/388581/7844/18/9868/4318/1385/6774/2887/55022/2213/5888/5026/6999/3624/84830/8000/983/3479/338328/23641/197/208/8061/374/53…
CC	GO:0012506	vesicle membrane	459	0.216937	1.93527	3.62927e-06	8.97758e-05	6.3249e-05	1592	tags=31%	list=21%	signal=26%	57126/26119/911/7039/4680/79895/3575/8972/84079/960/91782/154664/7018/6571/915/1183/306/728113/3119/817/8685/2069/3115/51257/3118/29881/255231/9214/274/79971/3117/5284/3111/245972/155066/83858/3122/2060/6272/963/4948/5861/79888/1832/6403/3140/11311/55016/57535/5337/150684/284697/1604/90342/30845/127124/10269/23114/8291/8514/307/57540/10542/6518/1378/284612/910/23095/23400/23120/81615/917/1823/557…
CC	GO:0070820	tertiary granule	78	0.388284	2.62629	3.77785e-06	9.29974e-05	6.55187e-05	1295	tags=41%	list=17%	signal=34%	1118/57126/79895/8972/3240/10321/116844/4317/2352/978/83858/963/1832/5337/1604/25797/23114/8514/1378/1823/4318/6947/1088/10562/3043/3958/53831/4973/28988/3608/820/2040
BP	GO:0002687	positive regulation of leukocyte migration	58	0.425391	2.65485	3.87848e-06	9.48281e-05	6.68085e-05	1367	tags=48%	list=18%	signal=40%	80310/1236/6401/177/3552/3554/3576/57402/6504/6403/8764/8784/57142/1907/23075/10563/3958/1908/2150/10894/972/7057/7423/4192/3579/6387/4254/5919
BP	GO:0071674	mononuclear cell migration	85	0.36837	2.55392	3.88962e-06	9.48281e-05	6.68085e-05	1367	tags=40%	list=18%	signal=33%	80310/1901/11240/4681/257144/1236/2625/56253/26228/26585/177/2321/255231/57402/6504/1880/8764/5339/57142/1907/131450/1511/1669/10563/9023/3958/84830/6368/7057/6347/4192/3579/6387/5919
CC	GO:0031332	RNAi effector complex	33	-0.427729	-2.9792	4.05968e-06	9.85006e-05	6.93959e-05	2675	tags=82%	list=36%	signal=53%	407009/55384/407013/167227/100423003/693137/407033/400931/442915/27044/768213/406918/100313843/100302281/693185/693135/693160/693162/406959/406977/442904/100126340/406960/57510/406986/406991/84981
BP	GO:0019884	antigen processing and presentation of exogenous antigen	27	0.553475	2.67937	4.30358e-06	0.000103921	7.32148e-05	1224	tags=59%	list=16%	signal=50%	911/3119/3115/3118/3117/3111/3122/3140/910/2213/3120/3127/3108/3112/3113/972
BP	GO:0070372	regulation of ERK1 and ERK2 cascade	99	0.347562	2.50135	4.54292e-06	0.000109181	7.69203e-05	1498	tags=41%	list=20%	signal=34%	80310/5320/2261/10125/6815/960/1236/8685/177/3552/57007/6504/1880/9378/3791/2192/5031/4921/6464/5590/1116/920/55333/5345/2266/3624/8000/116/3479/3976/2150/972/7010/7423/6764/10252/652/5156/1739/5159/10251
BP	GO:0043066	negative regulation of apoptotic process	320	0.239787	2.07956	4.73531e-06	0.000113268	7.97996e-05	2090	tags=42%	list=28%	signal=32%	9928/4353/940/4680/939/51176/54463/3575/64919/960/1236/1191/2625/219790/6097/332/115572/26585/3574/9214/3552/7088/57007/51738/2140/3791/8503/57448/10507/595/3162/84944/8784/22920/3339/83931/307/10542/4921/7015/6464/81788/5590/51542/9241/959/4318/1385/2266/1048/1311/3958/22943/983/6423/3479/153769/64399/350/7082/51384/80237/9026/57630/875/384/972/7057/7010/6347/7076/7423/4192/283/4923/3579/60675/1…
BP	GO:0044772	mitotic cell cycle phase transition	169	0.292838	2.33869	5.02298e-06	0.000119585	8.425e-05	1903	tags=41%	list=25%	signal=32%	6241/128239/699/4774/9928/8556/645121/55159/91782/57492/57405/9787/7272/332/8110/54443/11130/63967/2273/995/8900/4998/605/1063/51514/8462/348654/595/1104/91/245711/25949/4921/7015/51339/3624/983/220134/1033/9088/11065/3400/55143/5218/1869/6347/9510/28984/1739/890/80174/2305/57520/1977/10106/637/27183/301/9700/6604/9319/990/5347/1163/596/2146/64682/8881/701/9212
BP	GO:0002920	regulation of humoral immune response	22	0.592099	2.66035	5.34671e-06	0.000126697	8.92608e-05	952	tags=59%	list=13%	signal=52%	55061/1236/922/1380/11326/3075/1604/1378/2213/3263/2/710/10563
BP	GO:0050673	epithelial cell proliferation	167	0.293419	2.33903	5.45556e-06	0.000128675	9.06544e-05	1564	tags=40%	list=21%	signal=32%	128239/7039/64919/116844/2625/2069/2321/7049/5176/3142/51738/3664/7538/54206/639/49860/3791/4070/595/3162/3339/57142/9241/1823/6774/10000/5613/335/55333/10468/2810/1295/6423/3479/6664/350/374/51384/79152/3815/5365/7057/7010/2022/6347/7423/4192/283/55840/60675/5076/2254/2252/7472/6387/28984/652/7291/9037/1602/1739/1012/1051/6091/4163/637/6935
BP	GO:0001934	positive regulation of protein phosphorylation	152	0.305168	2.39777	5.50355e-06	0.000129206	9.10286e-05	1543	tags=39%	list=21%	signal=31%	2200/9928/7039/2261/100133941/10125/1236/55600/26585/2069/177/2321/63967/10178/3791/84722/8503/10507/595/8784/245711/116496/4921/3953/916/1116/1991/4318/920/55024/7448/84830/6423/116/22974/3479/3976/1908/374/3815/285489/972/7057/7010/7423/2252/9770/2674/28984/652/4254/5919/57214/5217/5159/6091/10211/7098/27040
BP	GO:0035710	CD4-positive alpha-beta T cell activation	70	0.389068	2.55947	5.54033e-06	0.00012947	9.12146e-05	834	tags=31%	list=11%	signal=28%	4063/149233/940/29851/51176/2625/8809/6097/9760/177/9308/91543/3142/1880/3122/3716/7292/1604/11126/5590/916/6774
BP	GO:0070661	leukocyte proliferation	158	0.295331	2.34072	5.63236e-06	0.000131017	9.23043e-05	1882	tags=42%	list=25%	signal=32%	5320/149233/100133941/940/10125/51176/3575/1191/56253/4064/1380/26585/51237/177/3574/3115/115352/3552/11326/6504/958/1880/3604/7292/8764/8654/1604/1378/923/916/959/2213/931/933/930/3485/3958/3479/6664/2150/23495/115650/3815/944/3113/57630/384/972/22806/64115/652/4254/1739/51083/1051/637/3135/301/2534/126259/57181/3070/5532/596/3251/4615/29110
BP	GO:0007608	sensory perception of smell	66	0.407606	2.65147	5.76646e-06	0.000133524	9.40706e-05	3137	tags=80%	list=42%	signal=47%	79290/391107/391192/8195/390072/2535/56656/123016/127534/128360/391109/343406/391112/128366/128367/128368/81448/391114/128371/128372/81442/441911/26476/127385/127623/81472/81470/81469/441933/343169/26188/284532/391189/343171/391191/81466/26246/284521/127059/391194/127062/391195/127064/391196/127066/127074/254879/26696/391211/127069/127077/401994/109
MF	GO:0005539	glycosaminoglycan binding	112	0.327115	2.40922	5.8025e-06	0.000133748	9.42282e-05	1504	tags=43%	list=20%	signal=35%	2200/4353/9806/960/5792/7049/3576/462/10178/3075/3990/8425/6403/238/63827/1991/1511/3698/7448/3827/3507/10563/1311/3512/26577/9388/10631/350/10894/5197/3730/6368/7057/2022/7423/4192/283/5553/2254/9510/11096/2252/11095/652/9037/8993/57214/5046
MF	GO:0008201	heparin binding	76	0.381012	2.55247	6.4779e-06	0.00014864	0.00010472	1354	tags=46%	list=18%	signal=38%	2200/4353/5792/7049/3576/462/10178/3075/3990/6403/238/1991/1511/7448/3827/10563/1311/26577/9388/10631/350/5197/3730/6368/7057/7423/4192/283/5553/2254/9510/11096/2252/11095/652
BP	GO:0043588	skin development	123	0.316673	2.3792	6.54087e-06	0.000149409	0.000105262	2695	tags=60%	list=36%	signal=39%	10913/64919/7357/5920/2069/3552/3664/7538/54206/10628/1832/91/5339/23254/151516/27245/10269/2736/8394/92344/1823/10468/1311/2810/3624/22943/3872/25928/51384/79152/54101/2252/94234/28514/51083/301/1475/2627/3849/3655/596/2146/4615/2137/5583/360/1969/57822/3925/126695/2707/8643/114803/7062/388697/2312/388698/254910/84648/353144/353142/26239/353139/353134/353133/353131/3713/163778/6698/6707/6705/627…
BP	GO:0051130	positive regulation of cellular component organization	407	0.221998	1.9617	6.74e-06	0.000153267	0.00010798	2114	tags=40%	list=28%	signal=30%	54674/26119/699/88/7039/940/55423/129293/84079/344/154664/7018/1236/1191/4771/9787/26228/6401/4751/183/53335/26585/2069/9760/54443/5581/3552/274/5176/9636/51738/10178/23397/261734/11346/9378/9639/6382/824/23499/57463/963/7203/3791/84722/65094/10507/51100/57535/10154/26052/1996/1639/388630/4921/238/1855/57498/80821/122060/8631/4318/2934/335/5345/2213/23075/7448/5244/10563/3958/983/220134/3479/1908…
BP	GO:0045765	regulation of angiogenesis	122	0.325305	2.44143	6.90543e-06	0.000156328	0.000110136	2959	tags=65%	list=39%	signal=40%	116844/306/26585/1545/2321/3552/5176/3576/51738/958/3716/10352/3791/8434/3162/3339/57142/7015/6464/11126/576/1116/6774/1647/10000/55333/10563/6423/350/7082/1990/7057/7010/2022/7423/4192/3579/133/820/9510/28984/28514/7291/9037/23554/6050/4086/6833/3135/7098/2534/2627/2041/126259/3315/4914/5293/4879/1969/1870/80149/7075/27329/2152/84432/204851/1893/4881/1944/1942/64218/128240/127385/356/63923/26254…
BP	GO:0010564	regulation of cell cycle process	280	0.251636	2.15776	6.95433e-06	0.000156735	0.000110423	2204	tags=43%	list=29%	signal=31%	6241/699/9928/7039/8556/940/6419/51176/55159/91782/57492/57405/9787/7272/4751/332/4288/2069/8110/54443/643/9493/11130/5581/3552/274/63967/2273/995/4998/23397/605/1063/11004/51514/8462/25909/49860/84722/348654/57448/5586/595/51100/1104/64793/1639/10269/25949/4921/7015/51339/79848/79866/5888/10112/3624/983/220134/22974/3479/3976/1908/9088/11065/55143/5218/1869/6347/79733/9510/28984/652/90293/1602/1…
BP	GO:0033993	response to lipid	348	0.236104	2.05682	7.01652e-06	0.000157437	0.000110918	1648	tags=34%	list=22%	signal=28%	149233/249/11240/4353/10225/1236/4317/1269/306/4064/26228/6401/8564/6097/3725/79931/1545/1036/54541/5581/7049/3552/274/5176/5723/3576/57402/5732/129607/7538/958/54206/7292/257101/842/2635/6382/824/7100/84676/10628/3399/6403/5031/8648/1604/64754/4656/51542/164091/3595/923/1991/1511/1669/4318/1385/6774/3779/55022/337/6696/5244/3485/2/10563/5950/3624/5069/84830/6374/22943/1734/54/10631/1591/117/2364…
BP	GO:0002455	humoral immune response mediated by circulating immunoglobulin	31	0.526913	2.70085	7.16269e-06	0.000159726	0.00011253	995	tags=52%	list=13%	signal=45%	55061/1191/716/3502/3493/1380/712/9214/1604/1378/2213/3500/715/3263/710/713
BP	GO:0050678	regulation of epithelial cell proliferation	136	0.309383	2.37882	7.18153e-06	0.000159726	0.00011253	1608	tags=42%	list=21%	signal=34%	128239/7039/64919/116844/2625/2069/2321/7049/5176/3142/51738/3664/7538/49860/3791/4070/595/3162/3339/57142/9241/1823/6774/10000/55333/2810/6423/3479/6664/350/374/79152/5365/7057/7010/2022/6347/7423/4192/283/55840/5076/2254/2252/7472/6387/28984/652/7291/9037/1739/1012/6091/4163/637/6935/2627
BP	GO:0050907	detection of chemical stimulus involved in sensory perception	73	0.385589	2.55909	7.34939e-06	0.000162746	0.000114658	3089	tags=77%	list=41%	signal=46%	79290/5284/83756/2780/391107/391192/390072/8989/56656/1472/80835/765/80834/128360/391109/343406/391112/128366/128367/128368/81448/391114/128371/128372/81442/441911/26476/127385/127623/81472/81470/81469/441933/343169/26188/284532/391189/343171/391191/81466/26246/284521/127059/391194/127062/391195/127064/391196/127066/127074/254879/26696/391211/127069/127077/401994
BP	GO:0051783	regulation of nuclear division	65	0.405749	2.62584	7.68439e-06	0.000169424	0.000119363	2073	tags=57%	list=28%	signal=42%	699/7039/940/57405/9787/7272/4751/332/4288/2069/11130/3552/995/1063/348654/1104/79866/220134/3479/3976/1908/9088/11065/55143/28984/652/157313/5159/9700/9319/5347/4487/8881/701/9212/54998/10459
BP	GO:0000910	cytokinesis	73	0.38432	2.55067	7.8024e-06	0.000171281	0.000120671	2164	tags=55%	list=29%	signal=39%	128239/1058/9928/8556/1731/91782/332/54443/643/9493/26586/5581/6711/25909/57448/5586/51100/5339/114327/151011/79848/10112/55143/79733/90293/27183/9700/51510/11113/990/5347/29127/24137/675/9212/55752/9903/80834/7798/3925
BP	GO:0006897	endocytosis	248	0.257103	2.18188	8.70986e-06	0.000190378	0.000134126	1879	tags=38%	list=25%	signal=30%	57126/26119/55061/1803/55423/344/154664/7018/1191/306/26228/6401/8685/6614/26585/4648/51257/5581/53353/9214/274/3576/9829/4688/22848/57007/6504/2060/6382/824/6272/5861/84058/5031/9938/284697/26052/9910/3339/30845/6900/8291/3953/8394/165530/55707/1991/2934/335/55333/2213/7448/933/4430/3958/22943/8867/197/2150/10894/30846/28988/9026/7057/6347/3579/133/28514/81035/10417/1012/967/23048/8976/10211/565…
BP	GO:0001818	negative regulation of cytokine production	125	0.312999	2.36622	9.08592e-06	0.000197746	0.000139316	2202	tags=49%	list=29%	signal=35%	7850/9173/149233/100133941/10225/225/51176/1236/2625/6614/177/9308/11326/51738/5443/28951/7538/6504/7292/9111/257101/9734/2192/307/1378/131450/1991/54941/335/55024/2213/3624/54/3479/2150/384/7057/5553/64115/28984/28514/7291/8993/301/671/2627/4795/5734/30009/490/197358/9466/2146/59307/2137/5966/80772/1969/2048/63906/7805
BP	GO:0044093	positive regulation of molecular function	308	0.239611	2.07071	9.23951e-06	0.000200229	0.000141066	2929	tags=54%	list=39%	signal=34%	2200/9928/88/2261/100133941/10125/6419/344/5920/1236/1191/2625/306/219790/8809/140/183/26585/2069/177/65979/2321/4919/143872/63967/10178/7188/8807/9639/49860/84722/6004/10507/595/245711/58484/2956/1907/10542/4921/1378/57103/8394/7015/238/5590/5996/51339/959/1116/1991/4318/6774/920/335/337/640/7448/4594/10563/116/22974/3479/350/338328/1908/2150/11065/3815/285489/972/7057/6347/54101/7225/7472/64115…
BP	GO:0019724	B cell mediated immunity	79	0.371519	2.51834	1.0138e-05	0.000218766	0.000154125	995	tags=35%	list=13%	signal=31%	55061/940/939/100423062/3514/1191/716/3502/3493/2205/1380/712/9214/958/7292/1604/2956/1378/959/2213/3500/23075/715/930/3538/3263/710/713
BP	GO:0051301	cell division	261	0.246486	2.0959	1.05109e-05	0.000224899	0.000158446	1939	tags=38%	list=26%	signal=29%	128239/699/259266/1058/9928/80310/7039/8556/51176/1731/91782/146909/57405/7153/4751/332/2069/54443/643/9493/11130/26586/5581/3552/6711/995/8900/23397/1063/11004/25909/84722/10628/57448/5586/595/51100/26009/1104/5339/1639/114327/151011/4300/53918/79848/91768/79866/10112/2810/983/6423/220134/22974/11065/55143/5218/23255/57553/7423/4192/79733/2119/2254/2252/28514/90293/890/157313/3833/11091/8976/847…
BP	GO:0043069	negative regulation of programmed cell death	330	0.237056	2.05682	1.04899e-05	0.000224899	0.000158446	2090	tags=42%	list=28%	signal=31%	9928/4353/940/4680/939/51176/54463/3575/64919/960/1236/1191/2625/219790/6097/332/115572/26585/3574/9214/3552/7088/57007/51738/2140/3791/8503/57448/10507/595/3162/54936/84944/8784/22920/3339/83931/307/10542/4921/57103/7015/6464/81788/5590/51542/9241/959/4318/1385/2266/1048/1311/3958/22943/983/6423/3479/153769/64399/350/7082/51384/3815/80237/9026/57630/875/384/972/7057/7010/6347/7076/7423/4192/283/…
CC	GO:0030136	clathrin-coated vesicle	83	0.357954	2.46641	1.06697e-05	0.000227336	0.000160163	1224	tags=37%	list=16%	signal=32%	26119/7039/3575/7018/6571/915/3119/2069/3115/3118/3117/9829/22848/155066/3122/6272/284697/1855/917/55707/920/23062/5244/3120/140679/374/3127/3113/28988/9026/972
BP	GO:0046651	lymphocyte proliferation	146	0.297807	2.30934	1.08677e-05	0.000230587	0.000162454	1871	tags=42%	list=25%	signal=33%	5320/149233/100133941/940/10125/51176/3575/56253/4064/1380/51237/177/3574/3115/115352/3552/11326/6504/958/1880/3604/7292/8764/8654/1604/1378/923/916/959/2213/931/933/930/3485/3958/3479/6664/23495/115650/944/3113/57630/384/972/22806/64115/652/4254/1739/51083/1051/637/3135/301/2534/126259/57181/3070/5532/596/3251/4615
MF	GO:0004252	serine-type endopeptidase activity	59	0.40534	2.53312	1.15254e-05	0.000243523	0.000171567	2474	tags=68%	list=33%	signal=46%	1803/3240/4317/716/7174/11330/1675/1991/1511/4318/715/4320/64499/7177/3816/1990/360200/219743/1075/5648/2999/4314/10699/3250/3818/5046/5657/3426/4316/5624/3004/3001/10747/63036/51032/23436/10136/54933/255738/2152
BP	GO:0048592	eye morphogenesis	72	0.381572	2.52085	1.16025e-05	0.000244134	0.000171998	2566	tags=67%	list=34%	signal=44%	2200/65979/639/84879/3791/7068/2780/256297/6774/220/1295/5950/6664/118427/51384/5076/2295/2201/7472/652/28514/7291/23554/5584/1735/6935/2737/6094/55764/123016/596/23322/128637/6659/10370/57096/148398/6497/9927/1969/4237/2048/1296/2301/8412/7482/204851/4853
MF	GO:0004930	G protein-coupled receptor activity	184	0.279602	2.26713	1.17185e-05	0.000245002	0.000172609	3438	tags=69%	list=46%	signal=38%	1901/1236/1269/140/643/79290/2840/57007/5732/1880/83756/9934/5031/2780/391107/391192/3352/576/9620/8843/117/2150/53831/1268/4923/3579/390072/5029/5745/11251/51083/2535/221395/5159/26996/1237/1951/56656/5734/552/1233/84658/9034/10936/387509/80835/80045/57085/80834/3362/2827/5724/4985/3061/2899/5733/5737/64123/23266/23566/54112/1952/4881/339403/128360/391109/343406/391112/128366/128367/128368/81448…
CC	GO:0030659	cytoplasmic vesicle membrane	454	0.215528	1.92053	1.17404e-05	0.000245002	0.000172609	1592	tags=31%	list=21%	signal=26%	57126/26119/911/7039/4680/79895/3575/8972/84079/960/91782/154664/7018/6571/915/1183/306/3119/817/8685/2069/3115/51257/3118/29881/255231/9214/274/79971/3117/5284/3111/245972/155066/83858/3122/2060/6272/963/4948/5861/79888/1832/6403/3140/11311/55016/57535/5337/150684/284697/1604/90342/30845/127124/10269/23114/8291/8514/307/57540/10542/6518/1378/284612/910/23095/23400/23120/81615/917/1823/55707/6484…
BP	GO:0007606	sensory perception of chemical stimulus	90	0.350787	2.46527	1.19231e-05	0.000247796	0.000174578	3137	tags=73%	list=42%	signal=43%	51176/79290/5284/83756/2780/391107/391192/8195/390072/8989/2535/6340/56656/1472/123016/2782/6339/80835/765/80834/127534/128360/391109/343406/391112/128366/128367/128368/81448/391114/128371/128372/81442/441911/26476/127385/431704/127623/81472/81470/81469/441933/343169/26188/284532/391189/343171/391191/81466/26246/284521/127059/391194/127062/391195/127064/391196/127066/127074/254879/26696/391211/12…
BP	GO:0040013	negative regulation of locomotion	132	0.305305	2.33292	1.25982e-05	0.000260757	0.000183709	1823	tags=45%	list=24%	signal=34%	11240/4681/1803/257144/2625/4771/26228/140/26585/1545/10395/7049/127435/5176/51738/4070/2192/8434/3162/9241/131450/1991/6774/1647/55333/10563/84830/6423/350/89927/5365/972/7057/2022/6347/7076/6387/28984/652/114757/9037/1602/7168/5217/6091/8976/4163/6833/482/647135/2041/8519/5734/23613/202243/84312/5796/596/9466
BP	GO:0001909	leukocyte mediated cytotoxicity	66	0.395426	2.57224	1.29534e-05	0.000266935	0.000188062	885	tags=33%	list=12%	signal=30%	914/911/149233/4068/10125/3575/56253/26228/177/5443/8807/3122/81607/3140/5551/100507436/910/11126/1991/1511/2213/3500
BP	GO:0001912	positive regulation of leukocyte mediated cytotoxicity	30	0.507609	2.56193	1.30546e-05	0.000266935	0.000188062	716	tags=40%	list=10%	signal=36%	911/149233/4068/10125/56253/26228/5443/8807/3122/3140/910/11126
BP	GO:0043010	camera-type eye development	134	0.307913	2.3574	1.30386e-05	0.000266935	0.000188062	2157	tags=50%	list=29%	signal=36%	2200/4774/64919/2625/4771/65979/1545/2321/5176/2703/261734/639/84879/3791/7068/157506/79888/2780/130557/343472/256297/7289/6774/130916/220/1295/5950/3624/6664/144165/51384/10586/5076/2295/10252/2201/7472/652/5156/28514/7291/1415/23554/1739/5159/1735/6935/2737/6094/55764/123016/6604/4810/23322/128637/2782/6659/10370/57096/148398/6497/388585/10218/9927/1969/2048/57822
BP	GO:0033077	T cell differentiation in thymus	41	0.456633	2.57132	1.35744e-05	0.000275472	0.000194076	1677	tags=54%	list=22%	signal=42%	940/10125/3575/64919/9840/1236/915/2625/9760/3552/3604/3140/2736/917/916/8876/972/652/285282/6935/2737/814
BP	GO:1902105	regulation of leukocyte differentiation	144	0.297997	2.30928	1.35807e-05	0.000275472	0.000194076	1688	tags=39%	list=22%	signal=31%	914/2200/149233/940/10125/939/51176/3575/9840/2625/56253/57492/9760/177/3574/115352/9308/3142/8808/3111/3122/7292/257101/639/2736/1378/63976/5590/1385/920/6932/2213/3624/3976/8876/57630/972/4192/22806/151176/64115/9770/652/4254/8993/10538/1051/3135/7098/6935/301/2737/10272/6604/814/30009
BP	GO:0007346	regulation of mitotic cell cycle	196	0.269203	2.20791	1.39358e-05	0.000281548	0.000198357	1903	tags=39%	list=25%	signal=30%	6241/699/9928/7039/8556/940/6419/55159/57492/57405/9787/7272/4751/332/4288/2069/8110/54443/11130/3552/63967/2273/995/4998/605/1063/51514/8462/348654/5586/595/1104/7531/7161/10269/25949/4921/7015/51339/79866/3624/983/220134/3479/1908/9088/11065/55143/1869/6347/9510/28984/652/1739/80174/157313/57520/1977/5159/10106/637/27183/301/9700/51053/6604/9319/990/5347/1163/596/675/2146/64682/8881/701/9212
BP	GO:0002711	positive regulation of T cell mediated immunity	32	0.508575	2.6523	1.4258e-05	0.000286915	0.000202138	719	tags=41%	list=10%	signal=37%	911/149233/2625/8809/3554/91543/6504/3122/7292/3140/1604/910/5590
BP	GO:0008544	epidermis development	141	0.296434	2.28324	1.47651e-05	0.000295944	0.000208499	3314	tags=67%	list=44%	signal=38%	10913/64919/7357/5920/2069/1687/3914/4610/3552/3664/7538/54206/10628/1832/84173/91/5339/23254/10269/2736/8394/92344/1823/10468/2810/3624/22943/3872/25928/51384/79152/2252/652/94234/28514/79987/4097/23764/51083/301/5357/1475/2627/3849/596/2146/222223/9497/2137/5583/360/388585/5351/1969/57822/3925/126695/2709/8643/114803/55283/7062/388697/2312/388698/254910/84648/353144/353142/26239/353139/353134/3…
BP	GO:0009593	detection of chemical stimulus	86	0.355537	2.48155	1.62069e-05	0.000323565	0.000227958	3089	tags=73%	list=41%	signal=44%	79290/5284/83756/2780/845/391107/391192/3779/2022/390072/8989/56656/1472/7097/4891/2137/80835/765/80834/128360/391109/343406/391112/128366/128367/128368/81448/391114/128371/128372/81442/441911/26476/127385/6262/127623/81472/81470/81469/441933/343169/26188/284532/391189/343171/391191/81466/26246/284521/127059/391194/127062/391195/127064/391196/127066/127074/254879/26696/391211/127069/127077/401994
BP	GO:0006958	complement activation classical pathway	24	0.558116	2.59343	1.68553e-05	0.000334439	0.000235619	995	tags=54%	list=13%	signal=47%	55061/1191/716/3502/3493/1380/712/1604/1378/3500/715/710/713
BP	GO:0002819	regulation of adaptive immune response	99	0.332077	2.3899	1.68835e-05	0.000334439	0.000235619	934	tags=28%	list=12%	signal=25%	55061/911/9173/149233/940/3575/2625/8809/1380/177/3554/91543/3142/6504/958/3122/7292/3140/8764/1604/1378/910/11126/5590/8631/920/2213/3263
BP	GO:0031294	lymphocyte costimulation	24	0.55772	2.59159	1.70318e-05	0.00033476	0.000235846	865	tags=50%	list=12%	signal=44%	100133941/940/29851/1803/1236/3932/7292/8764/11126/916/959/921
BP	GO:0031295	T cell costimulation	24	0.55772	2.59159	1.70318e-05	0.00033476	0.000235846	865	tags=50%	list=12%	signal=44%	100133941/940/29851/1803/1236/3932/7292/8764/11126/916/959/921
BP	GO:0007169	cell surface receptor protein tyrosine kinase signaling pathway	238	0.25389	2.14083	1.72602e-05	0.000337941	0.000238087	1500	tags=34%	list=20%	signal=28%	80310/7039/2261/50852/23484/79652/2625/26228/925/183/51237/2069/2321/54541/5284/51738/54206/9378/3932/3716/6272/9451/3791/10628/8503/84058/2051/9860/57142/4921/6464/238/10256/5590/388581/916/9241/4318/6774/2887/920/55022/29760/640/7448/3485/55816/3479/1288/64399/197/208/374/144165/3815/2050/9026/9068/7429/7057/7010/7423/151176/1442/2254/10252/56975/2252/2674/5156/28514/5919/1287/79987/59338/1012/…
BP	GO:0043085	positive regulation of catalytic activity	180	0.272068	2.19648	1.74e-05	0.000339367	0.000239092	2150	tags=44%	list=29%	signal=32%	2200/9928/2261/100133941/10125/6419/344/5920/1236/140/183/2069/177/65979/2321/143872/63967/10178/9639/84722/6004/10507/595/245711/2956/1907/4921/1378/57103/8394/7015/5996/1116/1991/6774/920/335/337/4594/10563/116/22974/3479/350/338328/1908/2150/11065/285489/972/7057/64115/9770/28984/57214/5159/6091/5657/7098/27040/2041/9175/9712/5347/202243/7074/3655/7014/2146/128637/6526/253959/22924/4914/375790…
MF	GO:0015026	coreceptor activity	25	0.540126	2.54371	1.77603e-05	0.000345067	0.000243107	850	tags=48%	list=11%	signal=43%	940/115350/925/83416/4919/7049/57007/8807/3791/8434/3595/920
BP	GO:0090068	positive regulation of cell cycle process	105	0.329393	2.38983	1.80201e-05	0.000347453	0.000244788	1903	tags=45%	list=25%	signal=34%	6241/699/9928/7039/8556/940/51176/9787/332/2069/643/9493/5581/3552/995/23397/51514/49860/348654/5586/595/4921/7015/79848/983/220134/3479/1908/11065/55143/79733/9510/28984/80174/5159/301/9700/11113/6604/990/4487/54892/29127/81610/2146/8881/9212
MF	GO:0046983	protein dimerization activity	375	0.221925	1.9455	1.80118e-05	0.000347453	0.000244788	2055	tags=39%	list=27%	signal=30%	6241/1058/11240/1803/4680/919/225/6419/11320/51361/1191/7153/817/332/1380/53335/26585/4610/29881/2947/5723/978/6282/79365/10178/89781/3613/1063/2635/1806/7159/84451/3399/348654/2034/84058/51100/150684/1104/3162/8575/7531/8648/845/2582/58484/57142/7015/4656/256297/9241/168537/8645/1669/1088/6774/1647/55163/920/335/337/5345/1875/84329/4594/220/1048/3512/27319/81624/6874/3400/6925/3815/7163/23255/30…
BP	GO:0097190	apoptotic signaling pathway	215	0.259263	2.14788	1.81569e-05	0.000348763	0.000245712	1866	tags=40%	list=25%	signal=31%	2261/100133941/940/939/960/1191/219790/183/1687/1545/3574/51330/54541/3552/57007/3932/842/2140/6272/7159/9451/8718/57448/91/3162/8575/84944/7161/2956/23612/7015/916/9241/959/4318/921/2213/2266/3958/2810/3624/6423/3479/51384/5366/8876/8739/80237/9026/57630/1869/972/27018/7057/1075/6387/652/4254/1396/85329/1051/7132/54700/637/64114/7098/64798/8794/23542/2534/467/55179/51741/3070/4487/2537/54870/203…
BP	GO:0051896	regulation of phosphatidylinositol 3-kinase/protein kinase B signal transduction	104	0.323869	2.3554	1.88794e-05	0.000361272	0.000254524	2193	tags=52%	list=29%	signal=37%	80310/2261/940/10125/1236/2625/183/2321/9378/49860/3791/6403/10507/57142/4921/23612/8394/388581/1116/55024/930/3479/2150/51384/3815/5783/8395/7057/7010/2022/7423/151176/4314/5156/79899/7291/9037/1739/59338/5159/3135/847/25827/8904/197358/2137/113791/4914/11315/2475/23252/65018/2046/83667
BP	GO:0007417	central nervous system development	387	0.2203	1.93727	1.9408e-05	0.000369992	0.000260668	1364	tags=27%	list=18%	signal=24%	259266/9928/1901/11240/9334/10642/51176/64919/23500/57125/1191/306/4771/9760/177/712/4919/23035/10395/54541/274/79971/6711/2840/26227/57007/583/1063/9378/140733/84879/57463/3399/55624/8704/2662/8434/7531/8648/7161/1996/3339/1639/6513/6900/23114/2736/57142/23334/4520/473/284612/343472/238/114327/2016/431707/51542/256297/7844/63827/8195/916/161357/9241/18/3212/23059/7289/1385/6774/10000/2934/9620/2…
BP	GO:0043367	CD4-positive alpha-beta T cell differentiation	54	0.406963	2.48539	1.96964e-05	0.000374085	0.000263551	403	tags=28%	list=5%	signal=26%	4063/149233/29851/51176/2625/8809/6097/9760/9308/91543/3142/1880/3122/3716/7292
BP	GO:0048593	camera-type eye morphogenesis	61	0.397436	2.5216	2.02089e-05	0.000382386	0.0002694	2566	tags=69%	list=34%	signal=46%	65979/639/84879/3791/7068/2780/256297/6774/220/1295/5950/6664/51384/5076/2295/7472/652/28514/7291/23554/1735/6935/2737/6094/55764/123016/23322/128637/6659/10370/57096/148398/6497/9927/1969/2048/1296/2301/8412/7482/204851/4853
BP	GO:0050852	T cell receptor signaling pathway	78	0.36918	2.49708	2.07004e-05	0.000389187	0.000274191	803	tags=29%	list=11%	signal=27%	940/53347/3702/50852/4068/919/387357/28639/9840/11118/1236/915/2625/3119/925/3115/3932/257101/11126/917/916/10384/8631
BP	GO:0051606	detection of stimulus	137	0.300006	2.30873	2.07219e-05	0.000389187	0.000274191	3089	tags=67%	list=41%	signal=40%	56253/79290/5284/83756/2780/845/391107/58484/391192/8195/3779/3815/2022/4923/390072/6387/1000/8989/1602/8993/56656/63982/1472/2534/6094/9397/7097/79823/4891/2137/7273/4914/80835/765/80834/6121/24/54112/1301/22911/114771/57115/912/128360/391109/343406/391112/128366/128367/128368/81448/391114/128371/128372/81442/441911/26476/127385/9293/23418/27185/6262/23596/114548/127623/81472/81470/81469/441933/…
BP	GO:0032729	positive regulation of type II interferon production	34	0.476651	2.51745	2.08885e-05	0.000390709	0.000275263	779	tags=38%	list=10%	signal=34%	914/149233/11118/56253/8809/3115/3554/9636/6504/7292/11126/3595/916
BP	GO:0045582	positive regulation of T cell differentiation	54	0.405901	2.47891	2.0957e-05	0.000390709	0.000275263	719	tags=31%	list=10%	signal=29%	149233/10125/939/51176/3575/9840/2625/57492/3574/9308/3142/8808/3122/7292/2736/1378/5590
BP	GO:0045058	T cell selection	35	0.478758	2.56071	2.15667e-05	0.000400604	0.000282234	850	tags=40%	list=11%	signal=36%	4063/149233/940/387357/64919/1236/915/2625/9760/3716/917/916/6774/920
BP	GO:0060322	head development	279	0.241026	2.06832	2.16636e-05	0.000400935	0.000282468	1648	tags=34%	list=22%	signal=28%	259266/9928/1901/11240/129293/10642/51176/64919/306/4771/9760/23035/10395/54541/79971/26227/583/1063/9378/140733/84879/57463/55624/8704/2662/7531/8648/1996/3339/6513/6900/23114/2736/57142/23334/473/284612/238/114327/2016/431707/256297/63827/8195/916/9241/18/3212/7289/1385/10000/2213/220/3624/22943/6423/81624/6664/140679/5101/89927/144165/3400/9963/91584/875/1869/221692/4192/3579/5076/5307/54510/2…
MF	GO:0030246	carbohydrate binding	92	0.338133	2.39223	2.38119e-05	0.000439091	0.000309349	3474	tags=74%	list=46%	signal=40%	1117/9976/8972/6401/55600/6614/388512/946/3122/55624/6403/3964/79623/6900/9563/6518/63827/165530/1116/158326/11226/7448/933/971/3958/283208/10219/79660/4973/2022/5553/3821/81035/57214/85329/432/6652/51809/10462/442117/26232/26270/5351/55057/8547/64175/23266/178/83998/5313/325/142683/6402/10216/947/2590/54583/78989/3795/130589/29094/50489/3099/130120/5968/114805/11227/22925
BP	GO:0051347	positive regulation of transferase activity	85	0.346534	2.40253	2.40923e-05	0.000442652	0.000311858	1543	tags=42%	list=21%	signal=34%	2200/9928/100133941/10125/5920/1236/183/2069/2321/63967/10178/84722/595/245711/4921/57103/1116/1991/920/335/337/116/22974/3479/1908/11065/285489/972/7057/9770/28984/57214/5159/6091/7098/27040
MF	GO:0008236	serine-type peptidase activity	63	0.382068	2.44982	2.55091e-05	0.000466991	0.000329005	2145	tags=60%	list=29%	signal=43%	1803/3240/4317/716/7174/11330/1675/1991/1511/4318/715/4320/64499/7177/3816/1990/360200/219743/1075/5648/2999/4314/10699/3250/3818/5046/5657/3426/4316/5624/54504/3004/3001/10747/63036/51032/23436/10136
BP	GO:0045621	positive regulation of lymphocyte differentiation	59	0.394884	2.46777	2.6274e-05	0.000479264	0.000337652	719	tags=31%	list=10%	signal=28%	149233/10125/939/51176/3575/9840/2625/57492/9760/3574/9308/3142/8808/3122/7292/2736/1378/5590
MF	GO:0019865	immunoglobulin binding	12	0.679084	2.42737	2.68122e-05	0.000487328	0.000343333	998	tags=75%	list=13%	signal=65%	2205/9214/5284/2213/931/933/3512/3958/2206
BP	GO:0061844	antimicrobial humoral immune response mediated by antimicrobial peptide	41	0.446707	2.51542	2.85593e-05	0.000517229	0.0003644	1844	tags=63%	list=25%	signal=48%	10578/3576/5443/6361/1991/1669/3827/6362/51297/10563/3958/6374/6367/5197/6368/6347/283/133/820/6387/8993/4283/4316/671/8346/8347
BP	GO:0030449	regulation of complement activation	14	0.650725	2.43895	2.90297e-05	0.000523877	0.000369083	942	tags=64%	list=13%	signal=56%	55061/922/1380/11326/3075/1604/1378/2/710
BP	GO:0001654	eye development	152	0.285868	2.24613	3.04536e-05	0.000547625	0.000385814	2157	tags=48%	list=29%	signal=35%	2200/4774/64919/2625/4771/65979/1545/2321/340273/5176/2703/261734/639/84879/3791/7068/157506/79888/2780/130557/343472/256297/7289/6774/130916/220/1295/5950/3624/6664/118427/144165/51384/10586/5076/2295/2254/10252/2201/7472/652/5156/28514/7291/1415/23554/1739/5584/5159/1735/6935/2737/6094/55764/123016/6604/4810/596/23322/128637/2782/6659/10370/57096/148398/6497/388585/10218/9927/1969/4237/2048/578…
BP	GO:0048880	sensory system development	154	0.287954	2.26535	3.16562e-05	0.000565241	0.000398225	2157	tags=48%	list=29%	signal=35%	2200/4774/64919/2625/4771/65979/712/1545/2321/340273/5176/2703/261734/639/84879/3791/7068/157506/79888/2780/130557/343472/256297/7289/6774/130916/220/1295/5950/3624/6664/118427/144165/51384/10586/5076/2295/2254/10252/2201/7472/652/5156/28514/7291/1415/23554/1739/5584/5159/1735/6935/2737/6094/55764/123016/6604/4810/596/23322/128637/2782/6659/10370/57096/148398/6497/388585/10218/9927/1969/4237/2048…
BP	GO:0150063	visual system development	154	0.287954	2.26535	3.16562e-05	0.000565241	0.000398225	2157	tags=48%	list=29%	signal=35%	2200/4774/64919/2625/4771/65979/712/1545/2321/340273/5176/2703/261734/639/84879/3791/7068/157506/79888/2780/130557/343472/256297/7289/6774/130916/220/1295/5950/3624/6664/118427/144165/51384/10586/5076/2295/2254/10252/2201/7472/652/5156/28514/7291/1415/23554/1739/5584/5159/1735/6935/2737/6094/55764/123016/6604/4810/596/23322/128637/2782/6659/10370/57096/148398/6497/388585/10218/9927/1969/4237/2048…
CC	GO:0045177	apical part of cell	175	0.270802	2.17547	3.27636e-05	0.000582753	0.000410562	3385	tags=66%	list=45%	signal=37%	259266/1803/4680/10913/8972/960/4008/7018/4771/60676/177/4648/340273/29881/10207/245972/2060/5337/5031/6513/3814/4921/6518/5590/84329/5244/3485/4430/1048/771/762/131578/338328/6579/7082/6565/206358/23255/100506658/9963/9026/11309/64116/7010/5745/28514/1000/8516/1739/7283/6340/221395/5584/5159/23428/6569/10768/8647/2030/1184/301/482/4810/92359/57181/3949/6526/9497/4891/1514/3320/6339/55966/155184/…
BP	GO:0060284	regulation of cell development	325	0.230859	2.00294	3.28668e-05	0.000582753	0.000410562	2392	tags=44%	list=32%	signal=31%	914/2200/259266/9928/149233/940/10125/939/51176/3575/84079/9840/23500/2625/56253/57492/4771/53335/9760/177/3574/115352/9308/3552/274/5176/3142/8808/9636/79365/3111/7538/3122/7292/257101/639/23499/57463/9734/58497/10507/8654/91/8434/10154/7161/22920/2736/57142/1378/63976/4656/5590/9241/1385/6774/920/6932/2213/6696/3624/3479/3976/6664/3400/8876/3815/80237/23316/57630/5365/972/4192/22806/151176/2119…
BP	GO:0019882	antigen processing and presentation	50	0.411995	2.4696	3.45203e-05	0.000608992	0.000429048	1581	tags=50%	list=21%	signal=40%	911/1236/3119/925/3115/3118/3117/3111/3122/3140/55016/910/2213/3120/57705/3127/8284/3108/3112/3113/972/7057/10981/3135/10890
BP	GO:0061061	muscle structure development	255	0.245804	2.0862	3.45868e-05	0.000608992	0.000429048	1948	tags=40%	list=26%	signal=30%	5738/1901/88/59269/51176/79652/57492/1310/26585/2069/8110/93145/7049/4811/274/3142/2273/79365/80206/688/1063/6382/824/6272/9734/963/3399/1832/2034/34/5339/221476/10269/4703/64754/284612/4656/51542/5600/9241/9868/55013/1385/1048/1311/22943/983/3479/3976/6664/25928/144165/4606/30846/3815/3021/2022/133/5307/6943/2254/11096/7472/445/6444/652/5156/28514/1000/7291/5997/84814/8516/7168/7402/23764/2535/5…
BP	GO:0002478	antigen processing and presentation of exogenous peptide antigen	20	0.583647	2.54137	3.56654e-05	0.000625811	0.000440897	1224	tags=65%	list=16%	signal=55%	3119/3115/3118/3117/3111/3122/2213/3120/3127/3108/3112/3113/972
MF	GO:0004175	endopeptidase activity	149	0.28089	2.18815	3.92303e-05	0.000685988	0.000483294	2474	tags=54%	list=33%	signal=37%	1803/129293/1519/3240/4317/716/60676/7174/842/824/151516/10269/388630/11330/6687/1675/1991/1511/4318/715/4320/10863/64499/7177/5069/170690/25825/8728/3816/1990/360200/643834/219743/1075/9510/5648/11096/2999/4314/11095/64066/10699/4311/3250/3818/5046/5657/3426/4316/5624/8904/9700/3004/121665/84749/3001/29843/91419/5687/1514/113791/1179/79258/10747/63036/51032/1889/84196/23436/10136/54933/4898/2557…
BP	GO:0032613	interleukin-10 production	30	0.484651	2.44606	4.03273e-05	0.000695578	0.00049005	1363	tags=53%	list=18%	signal=44%	149233/940/177/9308/9636/28951/7292/5590/959/6774/2213/2150/7057/5553/64115/28514
BP	GO:0032653	regulation of interleukin-10 production	30	0.484651	2.44606	4.03273e-05	0.000695578	0.00049005	1363	tags=53%	list=18%	signal=44%	149233/940/177/9308/9636/28951/7292/5590/959/6774/2213/2150/7057/5553/64115/28514
BP	GO:0002921	negative regulation of humoral immune response	12	0.665528	2.37891	4.01305e-05	0.000695578	0.00049005	1309	tags=75%	list=17%	signal=62%	55061/1380/11326/1604/1378/2213/2/710/5648
BP	GO:0032943	mononuclear cell proliferation	151	0.287381	2.25104	4.02525e-05	0.000695578	0.00049005	1882	tags=42%	list=25%	signal=32%	5320/149233/100133941/940/10125/51176/3575/56253/4064/1380/51237/177/3574/3115/115352/3552/11326/6504/958/1880/3604/7292/8764/8654/1604/1378/923/916/959/2213/931/933/930/3485/3958/3479/6664/23495/115650/944/3113/57630/384/972/22806/64115/652/4254/1739/51083/1051/637/3135/301/2534/126259/57181/3070/5532/596/3251/4615/29110
BP	GO:0043491	phosphatidylinositol 3-kinase/protein kinase B signal transduction	122	0.307555	2.30822	4.09602e-05	0.000704099	0.000496053	1592	tags=40%	list=21%	signal=32%	80310/2261/940/10125/1236/2625/183/2321/958/54206/9378/49860/3791/8503/6403/10507/57142/4921/23612/8394/11126/388581/1116/6774/55024/930/3479/2150/51384/3815/5783/8395/7057/7010/2022/7423/151176/4314/5156/79899/7291/9037/1739/59338/5159/3135/847/25827/8904
MF	GO:0005178	integrin binding	64	0.375406	2.41262	4.45647e-05	0.000763472	0.000537883	1409	tags=42%	list=19%	signal=35%	2200/57126/88/3680/4771/9636/3791/8425/6403/3964/2192/3339/8515/959/6696/7448/1311/6423/3479/7057/11096/2674/11095/6387/79987/8516/7402
BP	GO:0009913	epidermal cell differentiation	98	0.323348	2.31664	4.65713e-05	0.000795162	0.000560209	3314	tags=70%	list=44%	signal=40%	64919/7357/5920/2069/1687/4610/3552/3664/7538/54206/10628/1832/84173/5339/23254/2736/8394/2810/3872/51384/79152/652/28514/4097/23764/301/5357/1475/2627/3849/2146/9497/2137/5583/360/388585/1969/126695/8643/55283/7062/388697/2312/254910/84648/353144/353142/26239/353139/353134/353133/353131/3713/163778/6698/6707/6705/6278/84283/5317/50604/7399/23596/29841/9475/2355/51057/56603/130120
BP	GO:0070663	regulation of leukocyte proliferation	128	0.298181	2.2659	4.70107e-05	0.000799971	0.000563598	1580	tags=38%	list=21%	signal=31%	5320/149233/100133941/940/56253/26585/51237/177/3574/3115/115352/3552/11326/6504/958/1880/3604/7292/8764/8654/1604/1378/923/916/959/2213/933/3485/3958/3479/6664/23495/115650/3815/944/3113/57630/384/972/22806/64115/652/4254/1739/51083/1051/637/3135/301
BP	GO:1903706	regulation of hemopoiesis	173	0.268605	2.15325	4.753e-05	0.000804882	0.000567057	1688	tags=36%	list=22%	signal=29%	914/2200/149233/940/10125/939/51176/3575/9840/2625/56253/57492/9760/177/3574/115352/9308/3142/8808/9636/3111/7538/3122/7292/257101/639/91/2736/1378/63976/5590/1385/6774/920/6932/2213/3624/3976/8876/57630/972/4192/22806/151176/64115/9770/652/4254/28514/8993/10538/1051/3135/7098/6935/301/8362/2737/10272/8368/6604/814/30009
MF	GO:0042803	protein homodimerization activity	244	0.239788	2.03055	4.76168e-05	0.000804882	0.000567057	1434	tags=31%	list=19%	signal=26%	6241/11240/1803/919/225/6419/11320/51361/7153/817/332/1380/53335/26585/29881/2947/5723/978/6282/79365/10178/89781/3613/1063/2635/1806/7159/84451/348654/84058/51100/150684/3162/8575/845/2582/58484/57142/7015/9241/168537/1669/6774/1647/55163/920/335/337/5345/84329/4594/220/1048/3512/81624/3815/7163/23255/9026/7429/875/7057/2022/283/22806/8530/2040/7225/5648/5745/5156/7291/7168/57650/4311
BP	GO:2000146	negative regulation of cell motility	126	0.30247	2.29177	4.88918e-05	0.000823688	0.000580307	1823	tags=44%	list=24%	signal=34%	11240/4681/1803/257144/2625/4771/26228/140/26585/1545/10395/7049/127435/5176/4070/2192/8434/3162/9241/131450/6774/1647/55333/10563/84830/6423/350/89927/5365/972/7057/2022/6347/7076/6387/28984/652/114757/1602/7168/5217/6091/8976/4163/6833/482/647135/2041/8519/5734/23613/202243/84312/5796/596/9466
BP	GO:0051093	negative regulation of developmental process	330	0.226073	1.96154	4.96715e-05	0.000834053	0.000587609	3314	tags=59%	list=44%	signal=35%	2200/259266/2261/51176/23500/2625/4771/53335/26585/2069/54855/3552/5176/3142/51738/583/79365/28951/605/7538/7292/6272/4070/3399/10507/595/221476/84944/7161/26052/22920/3339/6900/9860/57540/57142/1378/6464/63976/11126/576/5600/9241/9868/4318/51123/6774/1647/55333/2213/6696/4320/10468/1048/5950/3624/22943/1081/6423/3479/6664/350/25928/197/374/144165/3400/3815/5783/1869/972/7057/7010/4192/55840/1511…
BP	GO:0001935	endothelial cell proliferation	58	0.391567	2.44376	5.01961e-05	0.00084008	0.000591855	1454	tags=52%	list=19%	signal=42%	116844/2321/51738/3791/3162/3339/6774/10000/5613/335/55333/1295/350/5365/7057/7010/2022/6347/7423/4192/283/60675/2252/7472/6387/28984/652/9037/1739/1012
BP	GO:0001938	positive regulation of endothelial cell proliferation	30	0.478972	2.4174	5.06674e-05	0.000845179	0.000595447	1454	tags=60%	list=19%	signal=49%	116844/51738/3791/3162/3339/6774/10000/5365/7010/7423/4192/283/2252/7472/6387/652/9037/1012
CC	GO:0019814	immunoglobulin complex	23	0.535047	2.45123	5.13031e-05	0.000852977	0.000600941	1589	tags=65%	list=21%	signal=52%	100423062/3514/3502/3493/974/5284/3500/3538/29802/3507/3512/3543/28669/28874/3494
BP	GO:0006508	proteolysis	472	0.203307	1.82034	5.47228e-05	0.00090686	0.000638903	3564	tags=61%	list=47%	signal=34%	7850/9928/1803/129293/9806/1519/6815/3240/57134/91782/7018/1191/4317/716/60676/177/7174/93611/274/5176/9636/28951/51514/842/824/118424/5192/3075/150684/8434/29116/55819/151516/10269/6900/58484/388630/9860/11330/1378/79654/136242/23400/7844/1855/6687/1675/10418/26249/1991/1511/4318/6774/2934/54941/5345/7448/3827/715/4320/10863/2266/54926/710/1359/64499/7177/1311/55872/5069/170690/153769/350/25825/…
BP	GO:0050920	regulation of chemotaxis	82	0.341932	2.34533	5.64235e-05	0.000931998	0.000656613	1500	tags=41%	list=20%	signal=34%	80310/1901/11240/4681/1803/1236/26228/26585/177/3576/57402/6504/1880/3791/1907/1991/23075/10563/1908/2150/91584/972/7057/6347/7423/4192/3579/6387/5156/5919/9037/1012/5159/6091
MF	GO:0019900	kinase binding	269	0.234502	2.0082	5.80958e-05	0.000956506	0.00067388	2135	tags=41%	list=28%	signal=30%	25780/914/9928/100133941/940/50852/919/257144/7153/26228/925/53335/115352/995/10540/28951/7538/54900/54206/3932/842/5208/9734/5784/1832/595/7161/10746/245711/26052/1639/6513/987/8394/4660/6464/11126/5590/1855/3595/923/916/8631/51339/6774/1647/920/2934/29760/55024/8115/79866/10112/2810/22974/285489/400581/5575/28984/8436/1000/1739/115703/890/7402/80174/2305/5159/1051/4086/27040/23542/2627/2041/162…
BP	GO:0033674	positive regulation of kinase activity	71	0.360799	2.37085	6.23903e-05	0.00102389	0.000721352	1543	tags=44%	list=21%	signal=35%	2200/9928/100133941/10125/1236/2069/2321/63967/10178/84722/595/245711/4921/57103/1116/1991/920/116/22974/3479/1908/285489/972/7057/9770/28984/57214/5159/6091/7098/27040
BP	GO:0030855	epithelial cell differentiation	257	0.239086	2.03123	6.38636e-05	0.00104469	0.000736004	3424	tags=62%	list=46%	signal=35%	1901/100133941/51176/64919/7357/5920/2625/4771/26585/2069/1687/4610/2947/3552/3664/688/7538/54206/639/6382/3791/7068/10628/3399/1832/2034/595/1266/84173/5339/23254/7161/307/2736/57103/8394/2016/340547/53918/4318/1385/5613/10468/3958/2810/3624/983/3872/10170/3976/6664/25928/2150/208/7082/51384/79152/80781/7429/79733/5076/6943/10252/56975/652/28514/1000/1066/4097/23764/2535/1051/7132/5624/6935/301/…
BP	GO:0006898	receptor-mediated endocytosis	93	0.32245	2.28489	6.63884e-05	0.00107215	0.000755354	630	tags=24%	list=8%	signal=22%	26119/55061/1803/344/7018/1191/6401/8685/6614/26585/53353/9214/3576/9829/22848/57007/2060/6382/84058/26052/3339/6900
BP	GO:0072593	reactive oxygen species metabolic process	93	0.322117	2.28254	6.63884e-05	0.00107215	0.000755354	1598	tags=41%	list=21%	signal=33%	3047/57126/4353/225/10901/3240/6571/3048/183/1545/54541/5581/4688/9644/57103/6464/1647/55022/3043/337/84329/54/3039/2150/5366/3050/875/384/7057/5076/4314/114757/137902/2305/5159/4129/847/2534
BP	GO:0007420	brain development	266	0.240392	2.05158	6.61905e-05	0.00107215	0.000755354	1648	tags=34%	list=22%	signal=27%	259266/9928/1901/11240/10642/51176/64919/306/4771/9760/23035/10395/54541/79971/26227/583/1063/9378/140733/84879/57463/55624/8704/2662/7531/8648/1996/3339/6513/6900/23114/2736/57142/23334/473/284612/238/114327/2016/431707/256297/63827/8195/916/9241/18/3212/7289/1385/10000/2213/220/3624/22943/6423/6664/140679/5101/89927/3400/9963/91584/875/1869/221692/4192/3579/5076/5307/54510/2254/7472/6387/652/28…
BP	GO:0045597	positive regulation of cell differentiation	329	0.221286	1.92126	6.59921e-05	0.00107215	0.000755354	1619	tags=31%	list=22%	signal=26%	259266/5320/149233/100133941/4681/10125/939/51176/3575/84079/9840/116844/5920/2625/57492/4771/183/53335/8110/9760/93145/177/3574/9308/4811/274/5176/3142/8808/9636/688/7538/3122/7292/55252/23499/57463/3791/4070/10507/8654/91/2662/10154/8648/7161/2736/4921/1378/7015/4656/5590/5600/55013/1385/6774/920/5345/2810/3624/22943/6423/3479/3976/6664/1908/3400/6925/8876/3815/80237/23316/5365/972/2022/4192/13…
MF	GO:0017171	serine hydrolase activity	65	0.378881	2.45197	6.85674e-05	0.00110383	0.00077767	2145	tags=60%	list=29%	signal=43%	1803/3240/4317/716/7174/11330/1675/1991/1511/4318/715/4320/64499/7177/13/3816/1990/360200/219743/1075/5648/2999/4314/10699/3250/3818/5046/5657/3426/4316/5624/54504/3004/3001/10747/63036/51032/23436/10136
BP	GO:0051983	regulation of chromosome segregation	61	0.380617	2.41489	6.91729e-05	0.00111005	0.000782054	2299	tags=59%	list=31%	signal=41%	699/57492/57405/9787/7272/332/4288/8110/11130/23397/605/1063/11004/348654/983/220134/11065/55143/157313/57520/9700/6604/9319/990/5347/54892/64682/116028/8881/701/9212/10459/55920/8289/9698/991
BP	GO:0050670	regulation of lymphocyte proliferation	122	0.300603	2.25605	6.94801e-05	0.00111146	0.00078305	1580	tags=39%	list=21%	signal=31%	5320/149233/100133941/940/56253/51237/177/3574/3115/115352/3552/11326/6504/958/1880/3604/7292/8764/8654/1604/1378/923/916/959/2213/933/3485/3958/3479/6664/23495/115650/944/3113/57630/384/972/22806/64115/652/4254/1739/51083/1051/637/3135/301
BP	GO:0002709	regulation of T cell mediated immunity	45	0.42869	2.48423	7.02528e-05	0.00112029	0.000789268	719	tags=33%	list=10%	signal=30%	911/149233/3575/2625/8809/177/3554/91543/6504/3122/7292/3140/1604/910/5590
BP	GO:0050679	positive regulation of epithelial cell proliferation	70	0.356633	2.34609	7.44188e-05	0.001183	0.000833451	1454	tags=44%	list=19%	signal=36%	128239/7039/116844/3142/51738/49860/3791/595/3162/3339/57142/9241/6774/10000/3479/6664/374/5365/7010/7423/4192/283/5076/2254/2252/7472/6387/652/7291/9037/1012
BP	GO:0042063	gliogenesis	134	0.28731	2.19967	7.57811e-05	0.00120089	0.000846056	2084	tags=46%	list=28%	signal=34%	4774/9334/51176/23500/1191/4771/26228/177/712/4919/274/2840/26227/1880/9639/5339/7161/6900/57142/3953/2016/51542/9241/6774/7448/983/3976/6664/208/374/89927/3400/79152/93377/10810/6347/4192/5076/2119/4147/28514/1000/5584/6833/482/2737/7074/3949/7097/2146/4615/6009/6659/26022/5583/400746/54587/6497/388585/80045/2475/7133
BP	GO:0002822	regulation of adaptive immune response based on somatic recombination of immune receptors built from immunoglobulin superfamily domains	93	0.319486	2.26389	7.71538e-05	0.00121884	0.000858698	934	tags=27%	list=12%	signal=24%	55061/911/9173/149233/940/3575/2625/8809/1380/177/3554/91543/3142/6504/958/3122/7292/3140/1604/1378/910/5590/920/2213/3263
BP	GO:0044321	response to leptin	10	0.699967	2.31033	7.81834e-05	0.00123127	0.000867455	854	tags=70%	list=11%	signal=62%	7357/583/595/3953/8195/6774/55022
BP	GO:1901701	cellular response to oxygen-containing compound	427	0.205333	1.82454	7.95287e-05	0.00124858	0.000879649	1871	tags=34%	list=25%	signal=27%	2200/80310/88/2261/4353/23484/9882/4317/57492/4064/26228/8564/6097/183/53335/51237/79931/177/1545/2321/54541/5581/3552/5176/3576/5732/51738/129607/7538/958/8807/3716/7292/257101/842/2635/824/57463/9734/7100/3791/5192/23175/8503/3399/5339/5031/54936/8648/1604/65220/4921/6518/64754/6464/57657/238/4656/5590/51542/388581/923/1511/1669/4318/1385/6774/2887/3779/55022/337/2213/6696/5244/5888/10563/3624/…
BP	GO:0000070	mitotic sister chromatid segregation	94	0.312929	2.21737	8.21996e-05	0.00128653	0.000906386	2073	tags=47%	list=28%	signal=34%	699/9928/55125/91782/146909/57405/9787/7272/4751/332/9493/11130/10540/23397/1063/11004/9639/84722/348654/1104/983/220134/22974/11065/144165/55143/7283/3833/3835/27183/9700/51510/9319/5347/54892/29127/3832/24137/8881/701/9212/7273/49856/10459
MF	GO:0061134	peptidase regulator activity	77	0.336953	2.26716	8.86002e-05	0.00138244	0.000973956	1321	tags=40%	list=18%	signal=34%	9806/5265/332/183/274/5176/462/3699/57448/2192/8434/221476/58484/3698/5345/3827/2/12/710/26577/6423/197/3700/3730/27018/7057/7076/8530/1075/58189/64115
BP	GO:0050906	detection of stimulus involved in sensory perception	99	0.311552	2.24219	8.95526e-05	0.00139301	0.000981406	3089	tags=69%	list=41%	signal=41%	79290/5284/83756/2780/391107/391192/8195/3815/4923/390072/6387/8989/56656/1472/2534/6094/4914/80835/765/80834/6121/1301/22911/128360/391109/343406/391112/128366/128367/128368/81448/391114/128371/128372/81442/441911/26476/127385/23418/27185/127623/81472/81470/81469/441933/343169/26188/284532/391189/343171/391191/81466/26246/284521/127059/391194/127062/391195/127064/391196/127066/127074/254879/2669…
BP	GO:1901654	response to ketone	76	0.348937	2.33759	9.22663e-05	0.00143083	0.00100805	1648	tags=45%	list=22%	signal=35%	1236/1545/54541/5581/7049/5176/5723/978/5732/54206/7292/842/10628/5031/8648/64754/51542/1385/6696/5244/2/3624/5069/10631/8061/57630/7057/445/1977/6340/6716/4129/5734/552
BP	GO:0031424	keratinization	26	0.505593	2.42609	9.28201e-05	0.00143503	0.00101101	2695	tags=85%	list=36%	signal=54%	3552/23254/2810/3872/3849/7062/388697/254910/84648/353144/353142/26239/353139/353134/353133/353131/3713/163778/6698/6707/6705/84283
BP	GO:0042129	regulation of T cell proliferation	87	0.32361	2.2619	9.46015e-05	0.00145813	0.00102728	1580	tags=40%	list=21%	signal=32%	5320/149233/100133941/940/56253/177/3115/3552/11326/6504/3604/7292/8764/8654/1604/1378/923/916/959/3485/3958/3479/115650/944/3113/57630/384/64115/652/4254/1739/1051/637/3135/301
BP	GO:0007423	sensory organ development	219	0.245525	2.04441	9.58962e-05	0.0014736	0.00103819	3516	tags=64%	list=47%	signal=35%	2200/4774/51176/64919/2625/4771/1687/65979/1545/2321/4648/4919/4610/340273/5176/2703/261734/639/84879/3791/7068/157506/79888/84173/8575/2780/130557/9890/343472/256297/1855/9241/7289/6774/130916/220/1295/5950/3624/27319/81624/6664/118427/144165/51384/3815/10586/5076/2295/2254/10252/2201/7472/652/5156/28514/7291/1415/8516/23554/1739/890/2535/5584/5159/1735/6935/5357/2737/6094/55764/123016/6604/4810…
BP	GO:0030323	respiratory tube development	63	0.363534	2.33098	9.81102e-05	0.00149939	0.00105635	1617	tags=48%	list=22%	signal=38%	2200/54206/3791/7068/157506/2034/7161/83931/2736/1907/9241/7289/1116/1385/9620/5950/3976/6664/64399/9963/6943/2254/10252/2252/7472/652/5156/4311/2627/2737
BP	GO:0032944	regulation of mononuclear cell proliferation	125	0.290655	2.1973	9.81653e-05	0.00149939	0.00105635	1580	tags=38%	list=21%	signal=30%	5320/149233/100133941/940/56253/51237/177/3574/3115/115352/3552/11326/6504/958/1880/3604/7292/8764/8654/1604/1378/923/916/959/2213/933/3485/3958/3479/6664/23495/115650/944/3113/57630/384/972/22806/64115/652/4254/1739/51083/1051/637/3135/301
BP	GO:2000516	positive regulation of CD4-positive alpha-beta T cell activation	22	0.538876	2.42122	0.000105997	0.00161415	0.0011372	779	tags=45%	list=10%	signal=41%	149233/940/9308/3142/3122/7292/1604/11126/5590/916
BP	GO:1901990	regulation of mitotic cell cycle phase transition	133	0.28026	2.14384	0.000106909	0.00162316	0.00114355	1949	tags=41%	list=26%	signal=31%	6241/699/9928/8556/55159/57492/57405/9787/7272/332/8110/54443/11130/63967/2273/995/4998/605/1063/51514/8462/348654/595/25949/4921/7015/51339/3624/983/220134/9088/11065/55143/1869/6347/9510/28984/1739/80174/57520/10106/637/27183/301/9700/6604/9319/990/5347/596/2146/8881/701/9212/29980
MF	GO:0050839	cell adhesion molecule binding	215	0.244553	2.02602	0.000115421	0.00174716	0.00123091	1455	tags=32%	list=19%	signal=26%	2200/57126/88/3680/4771/54443/177/5792/6711/6282/9636/10178/6504/9378/2060/23499/3791/5861/8425/1832/6403/5586/51100/3964/1266/5339/2192/7531/3339/6900/23114/57142/1261/8515/959/10562/6231/6696/23075/7448/2266/4430/1311/2810/6423/10631/3479/81624/7082/22837/28988/83939/5365/7057/22829/11096/2674/342035/11095/6387/1000/79987/8516/1739/7402/57650/1012/3337
BP	GO:0043434	response to peptide hormone	184	0.260195	2.10977	0.000117944	0.00178004	0.00125408	1615	tags=35%	list=22%	signal=28%	2200/88/249/2261/23484/9882/57492/183/51237/2069/1545/2321/1036/7049/51738/5443/54206/3716/6272/9734/3791/23175/6429/8503/87178/8648/6513/4921/6464/238/5590/388581/1385/6774/2887/55022/3624/197/208/374/3815/2050/7010/7076/133/151176/1442/445/6387/5156/5919/890/51083/6340/6716/5584/5159/6833/6569/10768/6773/847/10890/2041
BP	GO:0048002	antigen processing and presentation of peptide antigen	29	0.477617	2.38032	0.000118461	0.00178254	0.00125584	1224	tags=52%	list=16%	signal=43%	3119/3115/3118/3117/3111/3122/3140/55016/2213/3120/3127/3108/3112/3113/972
BP	GO:0051247	positive regulation of protein metabolic process	340	0.213296	1.85736	0.000119033	0.00178584	0.00125817	1367	tags=27%	list=18%	signal=23%	2200/9928/149233/7039/2261/100133941/940/129293/10125/10642/7018/1236/1191/55600/183/115572/26585/2069/177/1545/2321/51257/63967/4837/10178/28951/51514/9111/3791/84722/5861/8503/79888/65094/10507/595/5337/150684/29116/8784/245711/116496/6900/58484/388630/4921/1378/3953/343472/1855/916/10418/51339/1116/1991/4318/6774/920/2934/55024/7448/3624/84830/6423/3872/116/22974/3479/3976/153769/1908/208/374/…
BP	GO:0030336	negative regulation of cell migration	121	0.292734	2.18988	0.000123601	0.00184892	0.0013026	1823	tags=44%	list=24%	signal=34%	11240/4681/1803/257144/4771/26228/140/26585/1545/10395/7049/127435/5176/4070/8434/3162/9241/131450/6774/1647/55333/10563/84830/6423/350/89927/5365/972/7057/2022/6347/7076/6387/28984/652/114757/1602/7168/5217/6091/8976/4163/6833/482/647135/2041/8519/5734/23613/84312/5796/596/9466
BP	GO:0000082	G1/S transition of mitotic cell cycle	80	0.33578	2.27931	0.000126223	0.00188257	0.00132632	1840	tags=45%	list=25%	signal=34%	6241/128239/9928/645121/55159/57492/8110/2273/8900/605/8462/595/1104/91/245711/4921/7015/51339/3624/983/1033/3400/1869/6347/9510/28984/1739/890/1977/10106/637/301/6604/990/596/2146
BP	GO:0071216	cellular response to biotic stimulus	102	0.302634	2.18966	0.000129791	0.00193012	0.00135981	1629	tags=39%	list=22%	signal=31%	4317/4064/26228/8564/79931/5581/3552/3576/978/129607/7538/958/7292/2635/824/9451/7100/10628/1604/10269/57103/923/1511/1669/4318/81793/2213/10563/6374/23641/5197/6347/820/4314/445/10417/4283/671/4795/51510
BP	GO:0010629	negative regulation of gene expression	439	0.200286	1.78256	0.000130369	0.00193304	0.00136187	2204	tags=39%	list=29%	signal=29%	7850/90853/128239/9173/149233/100133941/940/10225/10642/225/51176/1236/2625/183/115572/6614/177/115352/9308/54855/5176/3576/22955/11326/51738/583/5443/7188/28951/7538/6504/9378/9869/7292/9111/257101/639/9451/9734/3791/6429/3399/87178/84069/6041/91/2192/7022/8575/84944/22823/1996/4343/10269/307/1378/7015/23381/8195/55729/6018/916/9241/131450/53918/389421/1991/8148/6774/54941/335/7644/55024/5345/22…
BP	GO:0003013	circulatory system process	212	0.243399	2.01596	0.000131419	0.00194293	0.00136884	1608	tags=36%	list=21%	signal=29%	3680/817/140/183/177/143872/274/51738/583/5443/84879/7068/1832/2034/8654/5339/7531/30845/845/6513/10269/1573/1907/6518/3953/3352/8195/18/1511/3779/2934/3043/5345/3827/2266/710/1359/1311/170690/10631/1908/2150/7082/3759/6565/3816/4973/1268/100506658/875/11309/7010/2022/7423/4923/3579/133/5029/5742/6444/6387/28514/5997/10699/79987/7168/1739/8509/57419/6340/23428/6833/2775/2030/2534/482/2627
BP	GO:0033045	regulation of sister chromatid segregation	48	0.397974	2.34336	0.00013267	0.00195572	0.00137785	1903	tags=54%	list=25%	signal=41%	699/57492/57405/9787/7272/332/8110/11130/605/1063/348654/983/220134/11065/55143/57520/9700/6604/9319/990/5347/64682/116028/8881/701/9212
BP	GO:0002825	regulation of T-helper 1 type immune response	17	0.568817	2.33269	0.00013475	0.00198063	0.0013954	403	tags=41%	list=5%	signal=39%	9173/149233/8809/3554/3142/6504/7292
BP	GO:0002285	lymphocyte activation involved in immune response	103	0.314417	2.28388	0.000139025	0.00203756	0.0014355	957	tags=28%	list=13%	signal=25%	4063/911/149233/940/29851/9452/51176/2625/4064/8809/6097/3142/958/1880/3122/3716/7292/257101/2956/1378/11126/5590/959/6774/2213/23075/5450/930/3958
BP	GO:0007507	heart development	227	0.240811	2.01616	0.000140279	0.00205001	0.00144428	2084	tags=42%	list=28%	signal=32%	2200/1901/88/2625/26585/9249/10395/7049/3552/56950/80206/639/9734/3791/3399/1832/34/5339/221476/7161/10269/2736/4703/57142/6464/284612/92749/1855/8195/5600/9241/23059/9868/1385/130916/5950/3624/22943/983/6423/3479/6664/144165/51384/2050/91584/7404/7010/2022/7423/7403/133/2254/9510/11096/10252/7472/6444/652/5156/28514/7291/5997/10512/7168/1396/2535/5159/6091/4086/7132/2627/2737/64598/162/55764/660…
CC	GO:0035580	specific granule lumen	35	0.44636	2.38742	0.000145241	0.00210551	0.00148338	1596	tags=54%	list=21%	signal=43%	1118/3240/10321/116844/4317/2352/25797/1116/1991/1669/6947/10562/5005/3608/820/8993/30/671/4069
BP	GO:0002526	acute inflammatory response	57	0.378655	2.34294	0.000145322	0.00210551	0.00148338	2865	tags=70%	list=38%	signal=44%	3240/5265/1236/2625/2205/3552/7292/923/1991/5345/2213/3500/2/12/197/3700/9332/5005/100313774/8876/1268/3579/445/9536/3818/1051/2215/59307/196527/11315/26279/5733/2152/3570/55870/325/1401/2212/2214/5743
BP	GO:0032870	cellular response to hormone stimulus	244	0.231116	1.95711	0.00014455	0.00210551	0.00148338	1868	tags=36%	list=25%	signal=28%	2200/88/11240/2261/23484/9882/7357/57492/183/51237/9249/1545/2321/54541/5581/5176/5732/51738/583/7538/54206/3716/7292/842/9734/3791/7068/23175/8503/5031/8648/4921/3953/64754/6464/238/5590/51542/388581/256297/164091/8195/6774/2887/55022/3485/3624/84830/1081/1591/197/208/56937/8284/3815/2050/7010/151176/1442/6943/445/5156/5919/890/1977/6340/5584/5159/6569/10768/23532/301/10890/2627/2041/5734/552/99…
BP	GO:0001936	regulation of endothelial cell proliferation	47	0.411796	2.4059	0.000146214	0.0021124	0.00148823	1454	tags=53%	list=19%	signal=43%	116844/2321/51738/3791/3162/3339/6774/10000/55333/350/5365/7057/7010/2022/6347/7423/4192/283/2252/7472/6387/28984/652/9037/1012
CC	GO:0031093	platelet alpha granule lumen	35	0.444036	2.375	0.000147955	0.00213148	0.00150168	1241	tags=51%	list=17%	signal=43%	88/5265/1191/7044/1675/5345/3827/2266/2/12/710/3479/197/1/5005/7057/7076/7423
BP	GO:0097530	granulocyte migration	60	0.367547	2.31876	0.000148884	0.00213275	0.00150257	1644	tags=47%	list=22%	signal=37%	57126/3680/1803/1236/255231/3552/3554/3576/57402/6504/57142/1907/10563/3958/6374/6367/1908/5197/972/7057/6347/4192/3579/5919/5657/4283/301/5734
BP	GO:0040007	growth	335	0.217707	1.89416	0.000148507	0.00213275	0.00150257	2079	tags=39%	list=28%	signal=29%	5738/259266/9928/1901/2261/2625/60676/817/183/53335/26585/2069/3574/57699/7049/978/3142/2273/51738/583/6905/688/84879/23499/84722/9699/157506/8425/87178/10507/91/5339/221476/84944/2780/7161/9462/83931/10269/2736/57142/1907/4921/3953/343472/2016/5590/51542/1855/8195/5600/9241/9868/55013/53918/1385/6774/6696/5026/1311/2810/5950/3624/983/1081/6423/3872/55540/10631/3479/1908/374/144165/1990/3021/9158…
MF	GO:0016799	hydrolase activity hydrolyzing N-glycosyl compounds	17	0.565285	2.31821	0.000151311	0.00215534	0.00151848	970	tags=53%	list=13%	signal=46%	9173/8809/3554/8808/8807/140733/54936/81793/55247
BP	GO:0007059	chromosome segregation	170	0.261646	2.08968	0.000150919	0.00215534	0.00151848	1948	tags=40%	list=26%	signal=30%	699/259266/9928/55125/1731/91782/146909/57492/57405/7153/9787/7272/4751/332/4288/8110/9493/11130/27030/10540/23397/605/1063/11004/9639/84722/348654/1104/84944/64793/245711/51112/983/220134/84057/22974/81624/11065/144165/55143/23255/7283/157313/57520/3833/3835/27183/9700/51510/6604/9232/9319/990/5347/54892/29127/3832/4439/81610/24137/64682/116028/8881/701/9212/22924/151648/7273
BP	GO:0007157	heterophilic cell-cell adhesion via plasma membrane cell adhesion molecules	23	0.51302	2.35031	0.000152173	0.00216154	0.00152285	953	tags=48%	list=13%	signal=42%	4680/56253/6401/9378/81607/57463/6403/84966/923/1088/1048
BP	GO:0045787	positive regulation of cell cycle	126	0.289522	2.19366	0.000153095	0.00216856	0.0015278	1946	tags=42%	list=26%	signal=32%	6241/699/9928/7039/8556/940/51176/9787/332/2069/643/9493/5581/3552/995/23397/51514/49860/84722/348654/5586/595/4921/7015/79848/983/220134/3479/1908/8061/11065/55143/79733/9510/28984/80174/1977/5159/301/9700/11113/6604/990/4487/54892/29127/81610/675/2146/8881/9212/22924/10370
BP	GO:0050854	regulation of antigen receptor-mediated signaling pathway	43	0.428572	2.45383	0.000156387	0.00220902	0.0015563	957	tags=40%	list=13%	signal=35%	53347/50852/4068/257144/9840/9404/1236/26228/115352/9214/3932/11126/2213/933/930/971/3958
BP	GO:0030216	keratinocyte differentiation	71	0.347733	2.28499	0.000160159	0.00225602	0.00158942	3314	tags=73%	list=44%	signal=41%	64919/7357/5920/2069/3552/3664/7538/54206/10628/1832/5339/23254/8394/2810/3872/51384/301/1475/3849/2146/2137/5583/360/1969/126695/7062/388697/2312/254910/84648/353144/353142/26239/353139/353134/353133/353131/3713/163778/6698/6707/6705/6278/84283/5317/50604/23596/29841/9475/2355/56603/130120
BP	GO:0051781	positive regulation of cell division	44	0.403913	2.3332	0.000161189	0.00226424	0.00159521	1903	tags=52%	list=25%	signal=39%	9928/80310/7039/8556/332/2069/643/9493/5581/3552/5586/79848/55143/7423/4192/2254/2252/847/11113/990/346389/29127/9212
BP	GO:0048661	positive regulation of smooth muscle cell proliferation	40	0.419445	2.34031	0.000161741	0.00226571	0.00159624	1472	tags=48%	list=20%	signal=38%	26119/80310/1901/3725/2069/3162/5031/4921/7015/1991/4318/5345/3479/7057/2254/9510/652/1012/5159
BP	GO:0034114	regulation of heterotypic cell-cell adhesion	10	0.681743	2.25018	0.000163472	0.00228365	0.00160888	916	tags=70%	list=12%	signal=62%	4680/960/177/3932/8631/335/2266
BP	GO:0048732	gland development	151	0.271404	2.1259	0.000164911	0.00229742	0.00161859	1617	tags=37%	list=22%	signal=30%	128239/7039/51176/10913/64919/2625/1545/1036/7049/79971/5176/3142/3664/540/54206/87178/595/34/8648/10269/2736/57142/3321/256297/9241/1385/335/7448/220/1081/64478/25928/208/374/3400/79152/1990/4192/55840/79733/5307/6943/2252/7472/445/652/5156/10512/1396/38/1051/6091/3235/2030/2627/2737
BP	GO:0030071	regulation of mitotic metaphase/anaphase transition	42	0.413478	2.35077	0.000166726	0.00230373	0.00162303	2299	tags=62%	list=31%	signal=43%	699/57492/57405/9787/7272/332/8110/11130/605/1063/348654/220134/11065/55143/57520/9700/6604/9319/990/5347/8881/701/9212/10459/8289/991
BP	GO:1902099	regulation of metaphase/anaphase transition of cell cycle	42	0.413478	2.35077	0.000166726	0.00230373	0.00162303	2299	tags=62%	list=31%	signal=43%	699/57492/57405/9787/7272/332/8110/11130/605/1063/348654/220134/11065/55143/57520/9700/6604/9319/990/5347/8881/701/9212/10459/8289/991
BP	GO:0031347	regulation of defense response	331	0.213592	1.85413	0.000166645	0.00230373	0.00162303	2741	tags=48%	list=37%	signal=32%	55061/9173/5320/149233/163702/940/4068/10225/10125/80342/1236/2625/4317/56253/26228/6401/183/79931/2069/177/92747/115352/5581/3554/91543/8808/2840/57402/9636/11326/51738/5443/10623/7538/8807/7292/9111/2635/81607/7100/3075/117157/7531/100507436/10269/58484/57142/1378/11126/388581/131450/9868/1991/4318/6774/54941/81793/335/2213/3263/2/710/2167/2810/55872/54/3479/197/2150/8061/100313774/6565/1268/38…
CC	GO:0030662	coated vesicle membrane	71	0.34705	2.2805	0.000170091	0.00234384	0.00165129	1916	tags=48%	list=26%	signal=36%	26119/7039/3575/7018/6571/915/3119/2069/3115/3118/3117/155066/3122/284697/917/55707/920/3120/140679/374/3127/3113/28988/9026/972/2535/57214/3135/162/10802/11014/3949/57706/535
BP	GO:0140058	neuron projection arborization	15	0.601421	2.33655	0.000171374	0.00235512	0.00165923	1704	tags=73%	list=23%	signal=57%	10642/84628/605/84879/23499/4343/1855/221692/10251/9175/23426
BP	GO:0060541	respiratory system development	73	0.346482	2.29954	0.000181711	0.00249043	0.00175456	1826	tags=49%	list=24%	signal=38%	2200/51176/54206/3791/7068/157506/2034/7161/83931/2736/1907/9241/7289/1116/1385/9620/220/5950/3976/6664/64399/9963/6943/2254/10252/2252/7472/445/652/5156/4311/2627/2737/4487/2033/23322
MF	GO:0016791	phosphatase activity	99	0.302128	2.17437	0.000191909	0.00261605	0.00184307	1891	tags=43%	list=25%	signal=33%	249/8556/5792/23035/5723/9829/995/7803/3613/84513/3932/2140/5208/5784/23175/58497/54935/55229/5778/57103/9890/54/1033/250/54886/8867/79660/5783/85464/84814/1739/147699/10106/1850/9989/55313/5533/5796/80895/5532/403313/5786/51020
MF	GO:0008289	lipid binding	321	0.214608	1.86121	0.000191584	0.00261605	0.00184307	961	tags=21%	list=13%	signal=19%	25780/26119/911/1901/5320/88/10125/344/26207/306/728113/80183/26228/6097/1687/92747/10395/57699/29881/274/2172/6711/26751/1880/9644/23263/3399/54477/6403/5051/84069/51100/5337/150684/56270/1604/55289/8291/307/23550/23612/6464/910/440738/23400/164091/923/7289/920/2934/81793/335/29760/337/23062/114884/79856/92017/866/83891/4430/27445/3507/51297/2167/1048/3512/5950
BP	GO:0002726	positive regulation of T cell cytokine production	16	0.579481	2.32519	0.000192669	0.00261936	0.0018454	719	tags=50%	list=10%	signal=45%	2625/8809/3554/91543/6504/7292/1604/5590
BP	GO:0051897	positive regulation of phosphatidylinositol 3-kinase/protein kinase B signal transduction	72	0.341878	2.25862	0.000194284	0.00262654	0.00185046	1592	tags=43%	list=21%	signal=34%	80310/2261/940/1236/2625/183/2321/9378/3791/6403/10507/57142/4921/388581/1116/930/3479/2150/51384/3815/7057/7010/2022/7423/151176/5156/79899/9037/5159/847/8904
BP	GO:1902107	positive regulation of leukocyte differentiation	76	0.337002	2.25763	0.000195269	0.00262654	0.00185046	1786	tags=43%	list=24%	signal=33%	149233/10125/939/51176/3575/9840/2625/57492/9760/177/3574/9308/3142/8808/3122/7292/2736/1378/5590/1385/920/3976/8876/972/4192/64115/4254/3135/301/2737/6604/3601/2033
BP	GO:1903708	positive regulation of hemopoiesis	76	0.337002	2.25763	0.000195269	0.00262654	0.00185046	1786	tags=43%	list=24%	signal=33%	149233/10125/939/51176/3575/9840/2625/57492/9760/177/3574/9308/3142/8808/3122/7292/2736/1378/5590/1385/920/3976/8876/972/4192/64115/4254/3135/301/2737/6604/3601/2033
MF	GO:0008047	enzyme activator activity	224	0.2396	2.00215	0.00019502	0.00262654	0.00185046	1703	tags=33%	list=23%	signal=27%	25780/55635/128239/7039/100133941/84079/9882/344/26228/3725/183/26585/2069/65979/10395/143872/5581/4688/51738/58504/54206/3932/9644/842/128272/6004/595/2192/2662/8575/9938/245711/9462/9910/2981/58484/4660/238/57514/5996/959/335/54885/337/8115/26577/6423/350/338328/374/116987/79817/28988/23413/27018/1075/64115/8490/28984/652/5156/5997/115703/80174/23158/5159/64798/23542/2534/55255/9175/341/9712/55…
MF	GO:1901681	sulfur compound binding	117	0.287989	2.14864	0.00019832	0.00266053	0.00187441	1616	tags=41%	list=22%	signal=33%	2200/4353/5792/7049/2947/3576/462/10178/51106/3075/3990/6403/1104/238/1991/1511/7448/3827/27010/10468/10563/1311/26577/9388/10631/350/5197/3730/6368/875/7057/7423/4192/283/5553/2254/9510/11096/2252/11095/9536/652/9037/38/5046/8435/7086/79918
BP	GO:0032465	regulation of cytokinesis	41	0.409076	2.30352	0.000200787	0.00267945	0.00188773	2117	tags=59%	list=28%	signal=42%	9928/8556/332/643/9493/5581/25909/57448/5586/51100/79848/10112/55143/79733/90293/27183/11113/990/5347/29127/675/9212/9903/80834
BP	GO:0008015	blood circulation	185	0.25118	2.03754	0.00020059	0.00267945	0.00188773	1521	tags=36%	list=20%	signal=29%	3680/817/140/183/177/143872/274/51738/583/5443/7068/1832/2034/8654/5339/7531/30845/845/10269/1573/1907/6518/3352/8195/18/1511/3779/2934/3043/5345/3827/2266/710/1359/1311/170690/10631/1908/2150/7082/3759/3816/4973/1268/100506658/875/7010/2022/7423/4923/3579/133/5029/5742/6444/6387/28514/5997/10699/79987/7168/1739/8509/6340/6833/2775
BP	GO:0045860	positive regulation of protein kinase activity	68	0.351905	2.30081	0.000201489	0.00268176	0.00188936	1543	tags=43%	list=21%	signal=34%	2200/9928/100133941/10125/1236/2069/2321/63967/10178/84722/595/245711/4921/1116/1991/920/116/22974/3479/1908/285489/7057/9770/28984/57214/5159/6091/7098/27040
BP	GO:0032570	response to progesterone	12	0.623397	2.22831	0.00020534	0.00271874	0.00191541	1236	tags=67%	list=16%	signal=56%	1545/5732/54206/10628/8648/51542/8061/7057
BP	GO:0046629	gamma-delta T cell activation	12	0.623068	2.22714	0.00020534	0.00271874	0.00191541	1279	tags=67%	list=17%	signal=55%	3702/919/51176/100507436/917/916/6932/3821
BP	GO:0055021	regulation of cardiac muscle tissue growth	19	0.547516	2.34193	0.000206187	0.00272285	0.00191831	1608	tags=68%	list=21%	signal=54%	7049/221476/7161/5600/9241/9868/5950/983/3479/2254/7472/5997/2627
BP	GO:0007204	positive regulation of cytosolic calcium ion concentration	56	0.371054	2.28979	0.000208504	0.0027463	0.00193483	1876	tags=52%	list=25%	signal=39%	1043/100133941/1236/643/57007/5732/51738/2780/1604/3814/23075/3827/5026/10563/116/117/2150/3579/133/60675/7225/1237/5734/552/121665/1233/596/57158/9034
BP	GO:0009615	response to virus	151	0.268655	2.10436	0.000211039	0.00277248	0.00195328	2025	tags=42%	list=27%	signal=32%	149233/163702/3434/1191/2625/1687/51257/54541/91543/9636/10623/958/54920/10964/3716/7292/9111/2635/6675/6041/3964/8575/5551/100507436/4343/10269/2736/10542/5600/9868/5450/51297/9582/6367/2150/8061/57705/5366/6387/10417/7728/4599/1665/4283/7098/6773/220001/8519/30009/2537/11274/3315/3429/5094/596/3437/7097/4615/29110/115004/200316/3320/338/55210
BP	GO:0042698	ovulation cycle	26	0.487754	2.34049	0.00021461	0.00281211	0.0019812	1426	tags=58%	list=19%	signal=47%	2069/1545/5176/2662/8648/3814/174/2/3624/1081/771/4192/9510/5156/59338
MF	GO:0016491	oxidoreductase activity	256	0.227577	1.93117	0.000223773	0.00292462	0.00206046	3651	tags=64%	list=49%	signal=34%	3047/6241/4353/10901/169714/84864/113612/3048/8564/9249/1545/1593/1036/4688/26227/4707/1757/54920/5498/3995/1806/157506/65094/54884/34/391059/3162/2820/55289/284613/127281/55256/8514/1573/9563/10130/374291/84842/2531/55163/317749/3043/220/9023/6999/283208/1734/10170/1591/2952/3039/1738/79152/8284/6821/3050/57553/7404/875/7403/8242/5742/119391/9536/22949/114757/124/125/137902/30/6716/11112/5161/19…
BP	GO:0045834	positive regulation of lipid metabolic process	46	0.393605	2.30072	0.000225408	0.00293328	0.00206656	1505	tags=48%	list=20%	signal=38%	26119/225/344/5581/3552/824/84879/157506/57540/1385/335/337/1081/13/208/972/133/23682/7291/1066/221395/7132
BP	GO:0031399	regulation of protein modification process	316	0.216405	1.87262	0.000225593	0.00293328	0.00206656	2078	tags=39%	list=28%	signal=30%	2200/9928/7039/2261/100133941/129293/10125/1236/55600/183/26585/2069/177/2321/5581/63967/4837/9636/995/10178/28951/54206/9111/9451/3791/84722/8503/2034/10507/595/26009/150684/2192/64793/8784/245711/116496/388630/4921/3953/5590/916/1116/1991/4318/1647/920/55022/55024/7448/2810/84830/22943/6423/116/22974/3479/1033/3976/153769/1908/9088/374/11065/144165/3815/5783/100506658/285489/972/27018/7057/7010…
BP	GO:0032103	positive regulation of response to external stimulus	254	0.225678	1.91267	0.000230588	0.00299057	0.00210692	1903	tags=37%	list=25%	signal=28%	9173/80310/1901/5320/940/4068/10125/80342/1236/4317/56253/4064/26228/183/79931/2069/177/92747/115352/5581/91543/3576/57402/5443/10623/6504/8807/7292/9111/2635/7100/3791/117157/7531/58484/57142/1907/11126/9868/54941/81793/5345/23075/7448/3263/2167/10563/350/1908/2150/8061/6565/1268/972/7057/7423/4192/3579/3821/1075/6387/5156/5919/81035/10924/9037/1012/5159/1051/7132/10211/3135/7098/25827/2534/4795…
CC	GO:0030135	coated vesicle	114	0.286886	2.13237	0.000231897	0.00299987	0.00211348	1940	tags=43%	list=26%	signal=32%	26119/7039/3575/5265/7018/6571/915/3119/2069/3115/3118/3117/9829/22848/155066/3122/6272/284697/1855/917/55707/920/23062/5244/3120/140679/374/3127/3113/28988/9026/972/146456/1075/2535/57214/3135/7851/11018/23392/162/23259/10802/11014/3949/5872/57706/535/115548
BP	GO:0050830	defense response to Gram-positive bacterium	48	0.387154	2.27965	0.000235712	0.00304146	0.00214278	2739	tags=71%	list=36%	signal=45%	5320/3575/3140/8764/1511/1669/54/944/283/133/820/6038/5919/8993/6035/4316/4069/8346/9466/7097/8347/4615/29110/1969/2634/388646/115361/163351/353144/353142/114771/57115/3570/1401
BP	GO:0016032	viral process	138	0.266576	2.04956	0.000240449	0.00309471	0.00218029	666	tags=20%	list=9%	signal=19%	4774/940/1803/11320/51176/3434/91782/7153/3725/1380/6614/91543/3576/9636/540/7538/6504/2060/81607/1939/5861/6041/8764/5586/1104/1604/10542/1378
BP	GO:0043068	positive regulation of programmed cell death	192	0.247749	2.02547	0.000250355	0.00321406	0.00226437	2084	tags=43%	list=28%	signal=32%	1191/7153/817/3725/183/1687/1545/51330/10395/274/5443/943/958/3932/8462/842/824/7159/10628/3399/84069/3162/8575/5551/8648/7161/58484/23612/57103/11126/959/4318/1647/2934/3827/220/3624/6423/2150/8061/5366/8876/8739/1268/1869/7057/6347/4923/3579/133/1075/9770/28984/652/51083/5584/7132/637/3135/7098/8794/301/2627/467/96459/51741/4487/54870/3001/3655/596/1612/196527/5134/322/6659/4914/11315/5293/1676…
BP	GO:0097191	extrinsic apoptotic signaling pathway	82	0.319818	2.19365	0.00025233	0.00323122	0.00227647	1866	tags=48%	list=25%	signal=36%	2261/939/183/3574/51330/3552/2140/6272/57448/91/3162/7015/959/2266/3958/3624/6423/3479/5366/57630/27018/7057/652/4254/7132/637/64114/7098/64798/8794/467/55179/51741/2537/3429/3655/596/1612/2730
BP	GO:0044843	cell cycle G1/S phase transition	88	0.316791	2.21239	0.000256129	0.00327161	0.00230492	1840	tags=43%	list=25%	signal=33%	6241/128239/9928/645121/55159/57492/8110/2273/8900/605/8462/49860/595/1104/91/245711/4921/7015/51339/3624/983/1033/3400/1869/6347/9510/28984/1739/890/1977/10106/637/301/6604/990/81610/596/2146
BP	GO:0007091	metaphase/anaphase transition of mitotic cell cycle	43	0.418685	2.39722	0.000259781	0.00330163	0.00232607	2299	tags=63%	list=31%	signal=44%	699/57492/57405/9787/7272/332/8110/11130/605/1063/348654/220134/11065/55143/57520/9700/6604/9319/990/5347/64682/8881/701/9212/10459/8289/991
BP	GO:0044784	metaphase/anaphase transition of cell cycle	43	0.418685	2.39722	0.000259781	0.00330163	0.00232607	2299	tags=63%	list=31%	signal=44%	699/57492/57405/9787/7272/332/8110/11130/605/1063/348654/220134/11065/55143/57520/9700/6604/9319/990/5347/64682/8881/701/9212/10459/8289/991
BP	GO:0006957	complement activation alternative pathway	10	0.665653	2.19708	0.000265044	0.00336009	0.00236726	762	tags=60%	list=10%	signal=54%	55061/1380/11326/3075/1378/1675
BP	GO:0048589	developmental growth	259	0.223857	1.90349	0.000267116	0.00337791	0.00237982	1840	tags=36%	list=25%	signal=28%	5738/259266/1901/2261/2625/53335/2069/3574/57699/7049/3142/51738/583/6905/688/84879/23499/9699/157506/10507/5339/221476/84944/2780/7161/9462/83931/10269/2736/57142/1907/4921/3953/343472/2016/5590/51542/1855/8195/5600/9241/9868/55013/53918/1385/6774/6696/5026/1311/5950/983/1081/6423/10631/3479/1908/374/144165/1990/3021/91584/7429/4192/133/2254/10252/2252/7472/6387/652/28514/5997/9037/59338/9576/40…
CC	GO:1904724	tertiary granule lumen	32	0.448733	2.34022	0.000268044	0.00338122	0.00238215	1596	tags=53%	list=21%	signal=42%	1118/3240/10321/116844/4317/2352/978/25797/4318/6947/10562/3043/28988/3608/820/8993/4069
BP	GO:0043368	positive T cell selection	27	0.476714	2.30777	0.000269578	0.00339213	0.00238983	2069	tags=63%	list=28%	signal=46%	4063/149233/387357/64919/915/9760/3716/917/916/6774/972/10538/30009/2033/596/1514/2475
BP	GO:0002440	production of molecular mediator of immune response	100	0.298336	2.14853	0.00027072	0.00339808	0.00239402	1887	tags=44%	list=25%	signal=33%	940/10225/2625/8809/51237/115352/3554/91543/6504/958/7292/8764/1604/2956/57142/1378/11126/5590/959/1991/335/2213/23075/933/3263/5950/54/2150/3815/972/5553/7291/10417/10538/3135/4316/7098/30009/7468/10721/54210/9466/4615/115004
BP	GO:0042113	B cell activation	131	0.276035	2.10458	0.00027341	0.00342337	0.00241184	1840	tags=40%	list=25%	signal=31%	940/10125/9452/939/51176/3575/115350/4064/1380/51237/974/643/3574/83416/115352/54900/958/1880/7292/9734/8503/2956/1378/959/29760/55024/2213/23075/931/933/5450/930/3507/3624/23495/115650/3815/7163/1316/972/22806/28514/6482/10538/285282/30009/96459/7468/57181/2033/596/9466/2146
CC	GO:0016324	apical plasma membrane	156	0.260688	2.0613	0.000274706	0.00343112	0.0024173	3385	tags=65%	list=45%	signal=36%	259266/1803/4680/8972/960/4008/7018/60676/177/340273/29881/10207/245972/2060/5337/5031/6513/3814/4921/6518/5590/84329/5244/3485/1048/771/762/131578/338328/6579/6565/206358/23255/100506658/9963/9026/11309/64116/7010/5745/28514/1000/1739/6340/5584/5159/23428/6569/10768/8647/2030/301/482/4810/92359/57181/6526/9497/4891/1514/3320/6339/55966/155184/10630/6536/10327/148930/22802/6814/6566/476/23632/898…
BP	GO:0019058	viral life cycle	101	0.304384	2.19678	0.000279715	0.0034851	0.00245533	1962	tags=45%	list=26%	signal=33%	4774/940/1803/3434/91782/7153/1380/6614/91543/3576/9636/6504/2060/81607/5861/6041/8764/5586/1604/10542/1378/920/9023/9582/983/131578/972/6347/2040/4599/25827/27183/1487/8519/51510/9712/91392/9397/3949/3429/5094/596/128637/200316/1514
BP	GO:0050855	regulation of B cell receptor signaling pathway	16	0.566384	2.27264	0.000283692	0.00352598	0.00248413	921	tags=56%	list=12%	signal=49%	257144/9404/26228/115352/9214/2213/933/930/971
MF	GO:0019902	phosphatase binding	63	0.347103	2.22562	0.000286653	0.00355407	0.00250392	1098	tags=33%	list=15%	signal=29%	11123/79368/55125/4751/65979/115352/26751/3932/3716/9451/7531/22920/23381/55917/23139/8631/6774/933/3958/153769/79660
MF	GO:0030296	protein tyrosine kinase activator activity	14	0.601445	2.25424	0.000291886	0.00360135	0.00253723	697	tags=50%	list=9%	signal=45%	7039/100133941/26228/26585/2069/51738/238
BP	GO:0072001	renal system development	136	0.270696	2.08136	0.000291507	0.00360135	0.00253723	1840	tags=41%	list=25%	signal=32%	2200/4774/80310/100133941/2625/183/26585/4811/5176/1063/639/842/6382/4070/157506/3399/7161/10269/2736/9241/26249/4318/5613/5950/170690/3976/6664/144165/384/7010/3579/5076/6943/9510/10252/2674/445/652/5156/28514/8516/1739/4311/5159/38/4086/6569/847/2737/162/123016/3070/90410/596/23322/2146
BP	GO:0009968	negative regulation of signal transduction	488	0.189786	1.70841	0.000293923	0.00361768	0.00254874	2202	tags=39%	list=29%	signal=30%	7850/2200/11240/53347/4681/4068/129293/23484/960/9404/1191/2625/4771/219790/26228/183/26585/79931/9249/92747/65979/3574/115352/10395/143872/54541/7049/3552/7088/3576/57007/9636/58504/6504/261734/54900/54206/9111/2140/6004/57448/2192/3162/7531/9938/388630/23334/23612/7015/63976/11126/5590/5996/916/9241/7289/4300/51339/4318/2887/55022/10000/54941/335/55333/55024/2213/933/2266/971/3485/10468/83891/3…
CC	GO:0071682	endocytic vesicle lumen	13	0.622933	2.30344	0.000296761	0.00364377	0.00256712	2003	tags=85%	list=27%	signal=62%	4353/10578/3240/3043/335/3263/3039/8993/1514/3320/338
BP	GO:0050790	regulation of catalytic activity	310	0.214847	1.85738	0.00029848	0.00365602	0.00257575	2164	tags=40%	list=29%	signal=29%	2200/9928/2261/100133941/9806/10125/6419/3240/3434/344/5920/1236/140/183/2069/177/65979/2321/143872/274/5176/63967/995/10178/28951/7538/54206/9639/6272/84722/6004/10507/595/8434/64793/245711/2956/23334/1907/4921/1378/57103/8394/7015/23400/5996/1116/1991/6774/1647/920/335/337/5345/7448/4594/710/10563/2810/116/22974/3479/1033/350/338328/1908/2150/9088/11065/285489/5365/972/7057/7076/8530/64115/9770…
BP	GO:0001913	T cell mediated cytotoxicity	27	0.473912	2.29421	0.000303534	0.00370897	0.00261305	1858	tags=59%	list=25%	signal=45%	911/149233/3575/177/3122/3140/5551/100507436/910/2213/3821/1075/3135/3004/5532/3251
CC	GO:0098802	plasma membrane signaling receptor complex	93	0.301147	2.13394	0.000311671	0.00379745	0.00267539	850	tags=25%	list=11%	signal=22%	149233/163702/3680/50852/919/28639/7018/915/8809/925/974/93145/7188/958/8807/91/8515/917/923/28683/916/8631/920
BP	GO:0014706	striated muscle tissue development	153	0.262102	2.06213	0.000312273	0.00379745	0.00267539	2079	tags=44%	list=28%	signal=32%	1901/88/59269/51176/1310/26585/7049/3142/80206/688/1063/9734/1832/34/5339/221476/7161/10269/4703/4656/51542/5600/9241/9868/55013/1385/5950/22943/983/3479/6664/144165/2022/5307/6943/2254/7472/6444/652/5156/28514/7291/5997/10512/7168/23764/5159/3235/4086/10211/2627/467/90410/4487/5532/2033/10791/596/57158/10529/10370/7273/4629/6497/2475/4878/4879
CC	GO:0098797	plasma membrane protein complex	242	0.23146	1.95717	0.000313403	0.00380207	0.00267864	1532	tags=31%	list=20%	signal=25%	149233/163702/777/3680/50852/919/28639/7018/915/3119/8809/925/974/93145/3115/3118/7049/3117/2703/4688/3111/245972/7188/2791/958/8807/3122/2060/57463/3140/91/2780/284697/3339/8514/6464/57657/8515/57685/917/923/28683/916/8631/3779/920/7448/3120/3507/2206/3479/3773/118427/8867/3127/3759/3108/3112/3113/56479/972/28669/2674/6444/1000/3754/8516/1739/7402/1012/10211/6833/2775/3135
BP	GO:0002698	negative regulation of immune effector process	61	0.356798	2.26377	0.000329777	0.00399117	0.00281187	1777	tags=48%	list=24%	signal=37%	55061/10225/3575/1380/115352/3142/11326/6504/7292/81607/100507436/1604/1378/335/2213/933/2/710/3958/54/5553/3821/5648/7291/8993/3135/301/30009/5532
MF	GO:0019956	chemokine binding	11	0.658391	2.25687	0.000342755	0.00413836	0.00291557	2090	tags=91%	list=28%	signal=66%	1236/643/57007/7538/2/3579/1237/1233/9034/10630
BP	GO:0030324	lung development	62	0.356127	2.27035	0.000346474	0.00417333	0.0029402	1617	tags=47%	list=22%	signal=37%	2200/54206/3791/7068/157506/2034/7161/83931/2736/1907/9241/1116/1385/9620/5950/3976/6664/64399/9963/6943/2254/10252/2252/7472/652/5156/4311/2627/2737
BP	GO:0002821	positive regulation of adaptive immune response	59	0.353235	2.20749	0.000347567	0.00417657	0.00294248	934	tags=31%	list=12%	signal=27%	911/149233/940/2625/8809/3554/91543/6504/958/3122/7292/3140/1604/910/5590/8631/920/3263
BP	GO:2000351	regulation of endothelial cell apoptotic process	22	0.514592	2.31211	0.000352454	0.00422528	0.0029768	1532	tags=64%	list=20%	signal=51%	2625/958/3791/7015/11126/959/2266/7057/7010/6347/28984/9037/5584/3135
BP	GO:0071363	cellular response to growth factor stimulus	263	0.222933	1.89948	0.000353869	0.00423224	0.00298171	1806	tags=36%	list=24%	signal=28%	2200/4774/80310/2261/4681/51176/79652/960/116844/9404/2625/3725/183/26585/2321/54541/7049/3576/7538/9378/6272/3791/8425/91/2662/1996/4921/6464/63976/238/4656/57498/9241/53918/1385/6774/2887/7448/10468/83891/10563/1311/55816/22943/6423/10631/6664/64399/25928/56937/3815/2050/8287/7429/7057/7010/2022/6347/7423/5076/2254/4093/10252/56975/2201/2252/7472/2674/652/5156/28514/65997/7291/8516/890/5159/967…
BP	GO:0061383	trabecula morphogenesis	18	0.533702	2.23659	0.000356181	0.00424987	0.00299413	1330	tags=61%	list=18%	signal=50%	1901/26585/7049/10507/9241/5950/7010/2022/9510/2201/30061
MF	GO:0030414	peptidase inhibitor activity	59	0.352465	2.20268	0.000362789	0.00431165	0.00303765	1305	tags=41%	list=17%	signal=34%	9806/5265/332/183/274/5176/462/3699/57448/8434/221476/3698/5345/3827/2/12/710/197/3700/3730/7057/7076/8530/58189
BP	GO:0002689	negative regulation of leukocyte chemotaxis	12	0.607456	2.17134	0.000363059	0.00431165	0.00303765	202	tags=42%	list=3%	signal=41%	11240/4681/1803/26228/26585
BP	GO:0002287	alpha-beta T cell activation involved in immune response	43	0.41133	2.35511	0.000376661	0.00443167	0.00312221	403	tags=28%	list=5%	signal=27%	4063/149233/29851/51176/2625/8809/6097/3142/1880/3122/3716/7292
BP	GO:0002293	alpha-beta T cell differentiation involved in immune response	43	0.41133	2.35511	0.000376661	0.00443167	0.00312221	403	tags=28%	list=5%	signal=27%	4063/149233/29851/51176/2625/8809/6097/3142/1880/3122/3716/7292
BP	GO:0002294	CD4-positive alpha-beta T cell differentiation involved in immune response	43	0.41133	2.35511	0.000376661	0.00443167	0.00312221	403	tags=28%	list=5%	signal=27%	4063/149233/29851/51176/2625/8809/6097/3142/1880/3122/3716/7292
BP	GO:0042093	T-helper cell differentiation	43	0.41133	2.35511	0.000376661	0.00443167	0.00312221	403	tags=28%	list=5%	signal=27%	4063/149233/29851/51176/2625/8809/6097/3142/1880/3122/3716/7292
BP	GO:0010720	positive regulation of cell development	174	0.247235	1.98419	0.000380893	0.00447109	0.00314998	1835	tags=37%	list=24%	signal=28%	259266/149233/10125/939/51176/3575/84079/9840/2625/57492/53335/9760/177/3574/9308/274/5176/3142/8808/3122/7292/23499/57463/10507/8654/10154/7161/2736/1378/4656/5590/1385/920/3976/6664/3400/8876/3815/80237/23316/5365/972/4192/2119/7472/64115/6387/652/4254/9037/4311/5584/6091/3135/5624/301/2737/9175/6604/7074/3601/2033/596/7097
CC	GO:0031902	late endosome membrane	74	0.330767	2.20688	0.000383422	0.00447595	0.00315341	1629	tags=42%	list=22%	signal=33%	91782/1183/3119/3115/3118/255231/3117/3111/3122/3140/55016/57535/5337/10269/10542/23400/23120/81615/7782/3120/3127/3108/3112/3113/285195/27065/967/29919/27183/653145/51510
CC	GO:0072686	mitotic spindle	81	0.317857	2.1762	0.00038338	0.00447595	0.00315341	1932	tags=47%	list=26%	signal=35%	259266/8556/50852/146909/9787/4064/9493/23035/26586/150468/26009/5778/1639/114327/983/220134/22974/10381/84617/3579/7283/57520/3833/11091/6569/3835/9700/990/5347/29127/3832/57325/81610/10474/6871/8881/9212/22924
BP	GO:0044770	cell cycle phase transition	205	0.242303	1.99411	0.000383956	0.00447595	0.00315341	1949	tags=38%	list=26%	signal=29%	6241/128239/699/4774/9928/8556/645121/6419/55159/91782/57492/57405/9787/7272/332/8110/54443/11130/63967/2273/995/8900/4998/605/1063/51514/8462/49860/348654/595/1104/91/245711/25949/4921/7015/51339/5888/3624/983/220134/1033/9088/11065/3400/55143/5218/1869/6347/9510/28984/1739/890/80174/2305/57520/1977/10106/637/27183/301/9700/6604/9319/990/5347/1163/81610/596/675/2146/64682/8881/701/9212/322/29980
BP	GO:0034695	response to prostaglandin E	12	0.606054	2.16632	0.000387883	0.00451137	0.00317836	936	tags=58%	list=12%	signal=51%	1236/5581/7049/5732/7292/5031/2
BP	GO:0051050	positive regulation of transport	312	0.216867	1.87462	0.000389617	0.00452117	0.00318526	2228	tags=43%	list=30%	signal=31%	57126/26119/88/55423/154664/7018/1191/4771/26228/6401/8564/55600/26585/5581/3552/274/79971/2273/51738/10178/6382/5208/57463/6041/5031/7531/65220/26052/3814/7015/11126/5590/388581/23400/18/1385/3779/335/2213/640/6696/931/160518/7448/930/5244/2266/5026/3958/2810/5950/3624/983/9388/116/3479/117/6664/1908/197/2150/208/3759/30846/100506658/9026/6347/283/4923/151176/5029/7225/6387/28984/9536/28514/1000…
MF	GO:0005030	neurotrophin receptor activity	27	0.466937	2.26044	0.000394309	0.00456516	0.00321625	2297	tags=70%	list=31%	signal=49%	2261/2321/6272/3791/4921/238/3815/2050/7010/2674/5156/5159/2041/4914/1969/2046/2048/284656/7075
BP	GO:0042098	T cell proliferation	97	0.299288	2.14067	0.000396546	0.00458061	0.00322714	1598	tags=38%	list=21%	signal=30%	5320/149233/100133941/940/10125/56253/177/3115/3552/11326/6504/3604/7292/8764/8654/1604/1378/923/916/959/3485/3958/3479/115650/944/3113/57630/384/64115/652/4254/1739/1051/637/3135/301/2534
BP	GO:0048738	cardiac muscle tissue development	90	0.30723	2.15916	0.00040077	0.00461887	0.0032541	2079	tags=49%	list=28%	signal=36%	1901/88/26585/7049/80206/1832/34/5339/221476/7161/10269/4703/5600/9241/9868/1385/5950/22943/983/3479/144165/2022/2254/7472/6444/652/5156/28514/5997/7168/5159/4086/2627/90410/4487/57158/10529/10370/7273/4629/6497/2475/4878/4879
BP	GO:0045916	negative regulation of complement activation	11	0.654378	2.24312	0.00040682	0.00467796	0.00329573	1309	tags=73%	list=17%	signal=60%	55061/1380/11326/1604/1378/2/710/5648
BP	GO:0036005	response to macrophage colony-stimulating factor	31	0.453037	2.32217	0.000411418	0.00472014	0.00332544	2297	tags=68%	list=31%	signal=47%	249/2261/26228/2321/3791/4921/238/6696/3815/2050/7010/5156/5159/2041/7097/4914/1969/2046/2048/284656/7075
BP	GO:0002292	T cell differentiation involved in immune response	45	0.396209	2.296	0.000419178	0.00479831	0.00338051	403	tags=27%	list=5%	signal=25%	4063/149233/29851/51176/2625/8809/6097/3142/1880/3122/3716/7292
BP	GO:1990266	neutrophil migration	44	0.387063	2.23586	0.000422456	0.00482494	0.00339928	1249	tags=41%	list=17%	signal=34%	57126/3680/1803/1236/255231/3552/3554/3576/57142/1907/10563/3958/6374/1908/5197/972/4192/3579
CC	GO:0009925	basal plasma membrane	112	0.27828	2.04955	0.000430015	0.00490023	0.00345232	3377	tags=67%	list=45%	signal=37%	26119/7039/3680/960/7018/7049/540/2060/4070/1832/5031/6513/3953/340547/1048/771/3773/338328/6579/7082/9963/11309/64116/7010/353189/5745/30061/9120/1000/1739/10211/23428/2030/301/8573/3949/490/6526/9497/3320/360/55966/10630/1187/1188/2035/127700/9132/149461/6536/7809/57554/9635/6814/6566/476/23632/89872/57127/912/3766/481/493/25778/947/1131/1838/9381/8884/4072/525/57835/150696/26504/389015
BP	GO:0062012	regulation of small molecule metabolic process	133	0.263824	2.01811	0.00043187	0.00491034	0.00345944	3887	tags=73%	list=52%	signal=36%	26119/225/344/6097/54541/978/4837/84879/84676/157506/34/5031/10269/9563/3953/57103/388581/1385/6774/55022/335/337/27010/9023/3479/117/208/79660/5366/3815/1268/972/4923/133/151176/219743/5745/7291/1066/11091/8647/552/5255/341/2033/3949/8445/10613/57673/338/11315/2475/23352/65018/23038/5724/93974/83667/2170/5563/2672/2330/405/1196/51744/55811/2327/2326/2329/5743/493/553/343035/9926/142/64801/2271/5…
BP	GO:0050921	positive regulation of chemotaxis	55	0.368618	2.26443	0.000436738	0.00495458	0.00349061	1806	tags=51%	list=24%	signal=39%	80310/1901/1236/177/3576/57402/6504/3791/1907/23075/10563/1908/2150/972/7057/7423/4192/3579/6387/5156/5919/9037/1012/5159/3603/7074/1233/3315
MF	GO:0061135	endopeptidase regulator activity	64	0.34306	2.20475	0.000441675	0.00499941	0.00352219	1321	tags=41%	list=18%	signal=34%	9806/5265/332/183/274/5176/462/3699/57448/8434/58484/3698/5345/3827/2/12/710/6423/197/3700/3730/7057/7076/8530/58189/64115
BP	GO:0150011	regulation of neuron projection arborization	10	0.647034	2.13562	0.00044977	0.0050797	0.00357876	1704	tags=80%	list=23%	signal=62%	84628/84879/23499/4343/1855/10251/9175/23426
BP	GO:0014911	positive regulation of smooth muscle cell migration	22	0.507827	2.28171	0.000457314	0.00514199	0.00362265	1472	tags=59%	list=20%	signal=48%	80310/1545/6282/5031/4921/7015/7448/10631/3479/4192/2254/9510/5159
BP	GO:0002715	regulation of natural killer cell mediated immunity	23	0.489417	2.24218	0.000457314	0.00514199	0.00362265	716	tags=39%	list=10%	signal=36%	4068/10225/10125/56253/8807/81607/117157/100507436/11126
MF	GO:0061809	NAD+ nucleosidase activity cyclic ADP-ribose generating	10	0.646072	2.13245	0.000462529	0.00517742	0.0036476	862	tags=60%	list=11%	signal=53%	9173/8809/3554/8808/8807/81793
BP	GO:0043065	positive regulation of apoptotic process	181	0.250545	2.02537	0.000463527	0.00517742	0.0036476	2084	tags=43%	list=28%	signal=32%	1191/7153/817/3725/183/1687/1545/51330/10395/274/943/958/3932/8462/842/824/7159/10628/3399/84069/3162/8575/8648/7161/58484/23612/57103/11126/959/4318/1647/2934/3827/220/3624/6423/8061/5366/8876/8739/1268/1869/7057/6347/4923/3579/133/1075/9770/28984/652/51083/5584/7132/637/3135/7098/8794/301/2627/467/96459/51741/4487/54870/3001/3655/596/1612/196527/5134/322/6659/11315/5293/1676/9927/7133
BP	GO:0040008	regulation of growth	203	0.233438	1.91855	0.000462125	0.00517742	0.0036476	2079	tags=40%	list=28%	signal=30%	9928/2261/60676/817/183/53335/26585/3574/57699/7049/978/3142/2273/51738/583/84879/23499/84722/9699/8425/87178/10507/91/221476/84944/7161/10269/57142/343472/51542/8195/5600/9241/9868/1385/6774/6696/5026/2810/5950/3624/983/1081/6423/3872/55540/3479/3021/91584/1154/7429/55840/2254/58189/7472/6387/28514/5997/9037/1735/5357/7086/2627/552/9175/4502/51316/4487/23180/596/26153/9043/10370/2137/80128/37579…
CC	GO:0005775	vacuolar lumen	59	0.34806	2.17515	0.000474414	0.0052771	0.00371783	2910	tags=68%	list=39%	signal=42%	11240/4353/6382/5551/3339/23400/63827/1991/1511/7276/12/4060/5005/972/1075/27065/27163/5159/23593/5657/671/4069/55313/51316/23197/1514/3320/375790/338/2517/9672/10487/5538/1520/388697/6278/913/8804/356/5549
BP	GO:0044403	biological process involved in symbiotic interaction	69	0.328459	2.15621	0.000474533	0.0052771	0.00371783	1871	tags=46%	list=25%	signal=35%	1803/3434/91782/1380/6614/3576/5443/6504/2060/81607/8764/2192/1604/1378/1991/1511/920/51297/9023/983/131578/2150/972/820/8993/27183/51510/91392/9397/3949/54210/4615
BP	GO:0021700	developmental maturation	111	0.284829	2.09393	0.000481779	0.00534596	0.00376635	1482	tags=34%	list=20%	signal=28%	4774/9928/1901/2261/9334/84079/2625/53335/26585/2069/712/9378/3791/2034/10507/8434/127124/6900/84966/473/63827/9389/2266/5026/3479/81624/1738/3021/283/5076/56975/2252/23682/5745/342035/51083/10981/967
BP	GO:0001501	skeletal system development	218	0.229417	1.9033	0.000494948	0.00548009	0.00386084	1745	tags=35%	list=23%	signal=28%	2200/4774/249/2261/960/129642/2625/1310/60676/26585/9249/51738/583/54206/9451/3791/157506/10507/83452/2662/8575/10269/2736/4921/3953/63827/8195/7227/5600/9241/3212/7289/1116/4318/158326/10468/5026/1311/5950/54/6423/3479/6664/64399/197/651/80781/875/7010/2022/7076/4192/5307/2254/56975/2201/9770/2114/5745/652/5156/7291/1739/59338/6716/11091/3235/4086/6935/2737/3216/64764/5734/80856/7468/51741/4487
BP	GO:0002438	acute inflammatory response to antigenic stimulus	19	0.520996	2.2285	0.00050385	0.00554235	0.00390471	1497	tags=63%	list=20%	signal=51%	1236/2625/2205/923/1991/2213/3500/2/100313774/1268/3579/2215
BP	GO:0031589	cell-substrate adhesion	132	0.261788	2.00039	0.00050204	0.00554235	0.00390471	1003	tags=25%	list=13%	signal=22%	9928/88/3680/10225/9806/4680/960/9404/1236/4771/6614/26585/10395/5581/4811/23499/3791/4070/5861/2192/8394/8515/5590/916/8631/10562/158326/5613/335/7448/2266/1295/10631
BP	GO:0031401	positive regulation of protein modification process	206	0.23309	1.91943	0.000503691	0.00554235	0.00390471	1543	tags=32%	list=21%	signal=26%	2200/9928/7039/2261/100133941/129293/10125/1236/55600/26585/2069/177/2321/63967/4837/10178/9111/3791/84722/8503/10507/595/150684/8784/245711/116496/388630/4921/3953/916/1116/1991/4318/920/55024/7448/84830/6423/116/22974/3479/3976/1908/374/11065/144165/3815/285489/972/7057/7010/7423/2252/9770/2674/28984/652/4254/5919/57214/5217/5159/6091/10211/7098/27040
BP	GO:0032633	interleukin-4 production	17	0.536483	2.20009	0.000513927	0.00562878	0.0039656	811	tags=47%	list=11%	signal=42%	940/51176/2625/9308/7292/5590/916/959
BP	GO:0032673	regulation of interleukin-4 production	17	0.536483	2.20009	0.000513927	0.00562878	0.0039656	811	tags=47%	list=11%	signal=42%	940/51176/2625/9308/7292/5590/916/959
BP	GO:0030900	forebrain development	153	0.25605	2.01452	0.000516054	0.00563989	0.00397343	2147	tags=43%	list=29%	signal=31%	259266/9928/10642/51176/64919/306/4771/9760/23035/10395/583/84879/55624/7531/8648/1996/6513/6900/2736/57142/23334/238/114327/2016/431707/63827/8195/9241/1385/220/3624/22943/140679/5101/89927/3400/91584/1869/221692/4192/5307/6387/652/1000/9037/3337/6716/6091/6935/2534/482/2737/123016/552/4487/23322/2146/3251/200894/26153/6497/388585/26038/374946/3362/2048
BP	GO:0033043	regulation of organelle organization	434	0.191024	1.69834	0.000517479	0.00564331	0.00397583	2192	tags=38%	list=29%	signal=29%	699/1901/88/7039/940/6419/84079/9882/91782/23500/1236/1191/57492/57405/4771/9787/7272/4751/163782/332/4288/2069/8110/11130/10395/26586/5581/3552/274/6711/995/10178/23397/605/1063/6504/11346/9639/6382/824/128272/7203/3791/10806/84722/4070/58497/348654/51100/57535/1104/83452/1639/30845/4703/23381/51112/23400/80821/8195/122060/4318/55022/2934/335/9620/5345/23075/79866/170690/983/220134/22974/3479/39…
BP	GO:0002688	regulation of leukocyte chemotaxis	52	0.366677	2.21928	0.000523744	0.00569937	0.00401533	1367	tags=42%	list=18%	signal=35%	11240/4681/1803/1236/26228/26585/3576/57402/6504/1907/23075/10563/1908/2150/972/7057/6347/7423/4192/3579/6387/5919
MF	GO:0020037	heme binding	48	0.372961	2.19608	0.000535934	0.0057954	0.00408299	1737	tags=50%	list=23%	signal=39%	3047/4353/113612/3048/1545/1593/3162/1573/3043/6999/26872/1591/3039/79152/6821/3050/875/5742/114757/137902/23593/847/90134/120227
MF	GO:0004866	endopeptidase inhibitor activity	56	0.353486	2.18138	0.000535997	0.0057954	0.00408299	1305	tags=41%	list=17%	signal=34%	9806/5265/332/183/274/5176/462/3699/57448/8434/3698/5345/3827/2/12/710/197/3700/3730/7057/7076/8530/58189
BP	GO:0007565	female pregnancy	73	0.328376	2.17938	0.000534306	0.0057954	0.00408299	1381	tags=42%	list=18%	signal=35%	51738/54206/639/84172/824/91/2192/8434/3339/6513/4318/6696/3485/5069/116/3976/64478/5368/23641/8061/1268/3021/875/7076/133/2201/5672/56977/5676/5997/10699
BP	GO:0033002	muscle cell proliferation	76	0.322391	2.15975	0.000540759	0.00583444	0.00411049	1503	tags=39%	list=20%	signal=32%	26119/80310/1901/3725/2069/7049/3162/5031/7161/4921/7015/4656/5600/9241/1991/4318/5345/5950/983/3479/7057/283/2254/9510/7472/652/7168/1012/5159/4086
BP	GO:0018108	peptidyl-tyrosine phosphorylation	75	0.313634	2.10131	0.000548899	0.00590969	0.00416351	1615	tags=41%	list=22%	signal=33%	7039/2261/26585/2321/54206/3932/3791/10507/8784/4921/238/5590/916/920/55024/640/7448/6423/3479/3976/374/3815/285489/7423/2252/2674/5156/4254/5159/2534/2041
BP	GO:0002286	T cell activation involved in immune response	57	0.355488	2.1996	0.000566625	0.00608761	0.00428886	1953	tags=47%	list=26%	signal=35%	4063/911/149233/29851/51176/2625/8809/6097/3142/1880/3122/3716/7292/5590/6774/2213/3958/2150/972/4192/10538/301/5734/30009/2033/29110/26022
MF	GO:0001664	G protein-coupled receptor binding	90	0.300934	2.11491	0.000580938	0.00621505	0.00437864	1648	tags=41%	list=22%	signal=32%	1901/25927/8685/183/3576/57402/51738/5443/3716/2780/26052/3814/1907/1855/7289/6362/10563/6374/116/6367/1908/5368/3039/5197/51384/6368/6347/133/60675/5029/7472/6387/51083/2775/4283/2534/552
BP	GO:0060537	muscle tissue development	161	0.2503	1.98971	0.000579964	0.00621505	0.00437864	2079	tags=43%	list=28%	signal=32%	1901/88/59269/51176/1310/26585/7049/3142/80206/688/1063/9734/1832/34/5339/221476/7161/10269/4703/4656/51542/5600/9241/9868/55013/1385/5950/22943/983/3479/6664/144165/2022/5307/6943/2254/7472/6444/652/5156/28514/7291/5997/10512/8516/7168/1739/23764/5159/3235/4086/10211/2627/467/90410/4487/5532/2033/10791/596/57158/10529/10370/7273/4629/6497/2475/4878/4879
MF	GO:0042277	peptide binding	91	0.297606	2.10596	0.000595392	0.00635474	0.00447706	2239	tags=51%	list=30%	signal=36%	26119/9452/1191/3119/8685/177/712/3115/3118/3117/3111/3122/3339/9868/335/2213/3120/25907/117/10381/3127/3108/3112/3113/972/283/590/11251/9883/4311/1396/57214/23428/3135/23542/2892/11014/3949/7097/322/22883/26232/2048/4985/23633/58512
CC	GO:0034364	high-density lipoprotein particle	10	0.637839	2.10527	0.000596501	0.00635474	0.00447706	1683	tags=80%	list=22%	signal=62%	344/1191/3990/335/337/350/3250/341
BP	GO:0042060	wound healing	158	0.246658	1.95495	0.000625726	0.00665211	0.00468656	1694	tags=37%	list=23%	signal=29%	960/116844/5265/91782/2069/177/51330/5581/3552/462/89781/958/3932/128272/23499/3791/1832/6403/5051/5339/2192/3162/4921/9241/959/1511/3043/5345/7448/3827/2266/710/1311/84830/3479/350/2150/100506658/9068/7429/7057/2022/7076/7423/58189/23452/5156/79987/7168/3818/5624/27183/301/653145/51510/80856/1861/203859
CC	GO:0016514	SWI/SNF complex	10	0.635442	2.09736	0.000628399	0.00666656	0.00469674	365	tags=50%	list=5%	signal=48%	64919/57492/53335/8110/605
BP	GO:0060627	regulation of vesicle-mediated transport	177	0.240229	1.93494	0.000635639	0.00672928	0.00474093	1845	tags=36%	list=25%	signal=28%	57126/26119/55061/88/55423/84079/9882/344/1731/154664/7018/1191/4771/26228/6401/26585/274/9829/22848/6504/6382/9699/84058/5337/83452/8291/11126/23400/1855/335/55333/2213/7448/933/2266/27445/3958/22943/197/2150/30846/9026/6347/5575/28514/1012/5217/967/8976/10211/5657/27183/301/55255/146722/1861/5533/341/84937/3601/5532/8573/7097/128637
BP	GO:0042744	hydrogen peroxide catabolic process	15	0.568126	2.20719	0.000667338	0.00705015	0.00496698	1568	tags=67%	list=21%	signal=53%	3047/4353/3240/3048/3043/337/3039/3050/137902/847
BP	GO:0061458	reproductive system development	121	0.273876	2.0488	0.000689505	0.00726164	0.00511599	1537	tags=38%	list=20%	signal=31%	259266/2625/2069/1545/3552/5176/54206/6382/7100/3791/157506/54477/7022/8648/431707/8195/9241/174/10468/2/5950/3624/1081/6423/64478/6874/3400/3815/3021/283/55840/9468/6943/2295/2254/9510/2674/652/5156/4254/1739/59338/1396/6716/1051/7098
BP	GO:0090287	regulation of cellular response to growth factor stimulus	113	0.275208	2.03684	0.000690221	0.00726164	0.00511599	1792	tags=42%	list=24%	signal=33%	2200/4681/79652/116844/2625/183/26585/7049/9378/3791/8425/63976/9241/53918/2887/7448/10468/83891/10563/55816/22943/6423/6664/64399/25928/56937/7057/2022/7423/2254/10252/56975/2201/652/28514/65997/8516/967/10251/6091/5046/6935/2627/10272/4487/84312/2033/8573
MF	GO:0005126	cytokine receptor binding	97	0.289796	2.07278	0.000700403	0.00734094	0.00517186	1535	tags=38%	list=20%	signal=31%	149233/116844/2625/26228/26585/3574/7049/3552/3576/57402/7188/7044/3716/7292/7100/6464/959/6362/10563/6374/3976/6367/5197/944/1154/6368/27018/2022/6347/7423/1442/6387/4254/65997/637/4283/64114
BP	GO:0044087	regulation of cellular component biogenesis	373	0.197494	1.72861	0.000700654	0.00734094	0.00517186	2164	tags=38%	list=29%	signal=28%	54674/9928/1901/129293/84628/84079/91782/23500/1236/1191/4771/26228/163782/183/53335/26585/54443/10395/5581/7049/274/9829/6711/9636/51738/10178/26751/688/261734/11346/9378/11178/9639/6382/23499/57463/3791/10806/84722/4070/9627/58497/6403/10507/26278/51100/57535/5337/1104/26052/1639/388630/57142/51112/5590/23400/8195/122060/8631/51339/2934/335/5345/23075/10563/3958/170690/22943/220134/2150/144165/…
BP	GO:0032689	negative regulation of type II interferon production	18	0.509653	2.13581	0.000703849	0.00735921	0.00518472	1448	tags=56%	list=19%	signal=45%	9173/10225/2625/6504/7292/257101/1378/3624/64115/8993
MF	GO:0008083	growth factor activity	50	0.363165	2.1769	0.000718353	0.00747858	0.00526883	1362	tags=44%	list=18%	signal=36%	80310/7039/183/2069/3574/7044/2662/3624/22943/3479/3976/374/651/7076/7423/4192/1442/2254/2252/6387/652/4254
BP	GO:0035051	cardiocyte differentiation	59	0.340386	2.12719	0.000718962	0.00747858	0.00526883	2069	tags=53%	list=28%	signal=38%	88/26585/7049/80206/34/5339/221476/10269/4703/9868/3624/22943/983/3479/144165/10252/6444/652/5156/28514/7291/5997/10512/5159/2627/90410/10529/10370/7273/4629/2475
BP	GO:0061024	membrane organization	275	0.217022	1.85983	0.00071969	0.00747858	0.00526883	2202	tags=41%	list=29%	signal=30%	914/100133941/1803/225/79895/84079/9882/7357/91782/1191/26207/80183/26228/8685/2352/274/6711/22848/6504/9378/84879/57198/5861/23175/84058/51100/1104/5339/9938/284697/26052/1639/5877/10269/6900/57142/1378/284612/51112/23400/1855/6687/23120/9868/2934/2213/5244/10112/9023/983/81624/8867/2150/208/79152/5366/30846/28988/9026/7057/342035/8436/1000/81035/1739/5584/8976/10211/4599/637/27040/63982/27183/8…
MF	GO:0016798	hydrolase activity acting on glycosyl bonds	46	0.37169	2.17262	0.000723245	0.00750016	0.00528403	569	tags=26%	list=8%	signal=24%	1118/9173/8972/57134/8809/3554/8808/149175/8807/280/140733/54936
CC	GO:0031967	organelle envelope	388	0.197344	1.73645	0.00072813	0.0075354	0.00530886	3780	tags=64%	list=50%	signal=33%	5320/249/204/169714/4008/80342/91782/113612/1191/8564/1593/284723/274/91543/995/4707/83858/1063/51514/9378/5498/6272/25909/79590/23175/80775/54884/87178/84069/595/51100/34/5339/3162/7531/2820/245711/1996/1639/94097/64222/10269/307/29957/57540/57142/57103/5590/374291/6687/9868/55013/9389/55333/3958/1591/144165/5366/6821/1268/89874/2628/590/445/9536/84814/9883/57038/57214/9553/10981/55173/4086/4129…
BP	GO:0046634	regulation of alpha-beta T cell activation	59	0.339944	2.12443	0.000739358	0.00763602	0.00537974	779	tags=27%	list=10%	signal=24%	149233/940/2625/56253/177/9308/3142/3122/7292/257101/639/8764/1604/11126/5590/916
MF	GO:0042605	peptide antigen binding	22	0.491917	2.21023	0.000743515	0.00766334	0.00539899	1532	tags=59%	list=20%	signal=47%	3119/3115/3118/3117/3111/3122/3120/3127/3108/3112/3113/23428/3135
BP	GO:0032693	negative regulation of interleukin-10 production	11	0.634373	2.17454	0.000753276	0.0077482	0.00545878	1363	tags=73%	list=18%	signal=60%	149233/177/28951/2213/7057/5553/64115/28514
MF	GO:0046906	tetrapyrrole binding	53	0.359772	2.19565	0.000757987	0.00778088	0.0054818	1737	tags=49%	list=23%	signal=38%	3047/4353/113612/3048/1545/1593/3162/1573/6947/3043/4594/6999/26872/1591/3039/79152/6821/3050/875/5742/114757/137902/23593/847/90134/120227
BP	GO:0034612	response to tumor necrosis factor	71	0.322262	2.11762	0.000767346	0.00784519	0.00552711	1343	tags=37%	list=18%	signal=30%	3899/2625/4317/6401/1687/1545/3576/7538/958/2635/8718/8764/8491/8784/4656/1116/55022/335/2167/10631/2150/115650/7057/6347/820/445
BP	GO:0032102	negative regulation of response to external stimulus	172	0.238588	1.91024	0.000767101	0.00784519	0.00552711	1818	tags=38%	list=24%	signal=30%	55061/11240/4681/1803/10225/2625/26228/26585/2840/9636/11326/51738/7538/9111/81607/100507436/9860/1378/388581/1855/131450/1991/6774/335/5345/2213/6696/7448/3827/2266/2/710/10563/2810/55872/84830/54/3479/350/100313774/384/64116/7057/7010/6347/4192/8530/3821/58189/5156/9037/3818/8993/6091/7132/3135/6773/5624/2534/4795/5734/11274/8573/3949/5094/197358
BP	GO:0002824	positive regulation of adaptive immune response based on somatic recombination of immune receptors built from immunoglobulin superfamily domains	57	0.350445	2.16839	0.000781018	0.0079689	0.00561427	934	tags=30%	list=12%	signal=26%	911/149233/940/2625/8809/3554/91543/6504/958/3122/7292/3140/1604/910/5590/920/3263
BP	GO:0060420	regulation of heart growth	20	0.518653	2.25837	0.000789735	0.00804166	0.00566553	1608	tags=65%	list=21%	signal=51%	7049/221476/7161/5600/9241/9868/5950/983/3479/2254/7472/5997/2627
BP	GO:0071548	response to dexamethasone	12	0.587736	2.10084	0.000792071	0.00804928	0.00567089	1428	tags=67%	list=19%	signal=54%	1545/54541/5176/842/64754/5069/445/1977
BP	GO:0045137	development of primary sexual characteristics	95	0.28625	2.0392	0.000798693	0.00810034	0.00570687	2001	tags=46%	list=27%	signal=34%	259266/2625/2069/1545/3552/6382/7100/3791/157506/7022/8648/431707/8195/174/10468/2/3624/1081/6423/117/64478/6874/3815/3021/283/9468/6943/2254/9510/2674/5156/4254/1602/59338/6716/1051/7098/2627/596/675/128637/5872/10370/4914
CC	GO:0005770	late endosome	120	0.270074	2.01891	0.000801964	0.00810518	0.00571028	2011	tags=42%	list=27%	signal=32%	84079/91782/7018/1183/3119/6614/3115/3118/255231/3117/540/3111/3122/3140/55016/57535/5337/10269/8291/10542/23400/57498/23120/81615/7782/3120/3127/3108/3112/3113/643834/972/5575/8530/285195/2674/27065/967/29919/27183/23392/653145/51510/81552/3949/10791/4891/1514/23274/4914/51150
BP	GO:0030198	extracellular matrix organization	141	0.252548	1.94521	0.000803965	0.00810518	0.00571028	1536	tags=36%	list=20%	signal=29%	1803/9806/4317/1310/183/26585/1545/7049/4811/8425/55624/169611/2192/8434/4921/25903/23127/1991/1511/4318/5345/7448/4320/7177/1311/1295/84830/170690/283208/6423/10631/1288/4060/144165/80781/64116/2022/2295/9510/11096/4314/11095/28984/4147/5156/64066/1287/8516/7132/10211/4316
BP	GO:0043062	extracellular structure organization	141	0.252548	1.94521	0.000803965	0.00810518	0.00571028	1536	tags=36%	list=20%	signal=29%	1803/9806/4317/1310/183/26585/1545/7049/4811/8425/55624/169611/2192/8434/4921/25903/23127/1991/1511/4318/5345/7448/4320/7177/1311/1295/84830/170690/283208/6423/10631/1288/4060/144165/80781/64116/2022/2295/9510/11096/4314/11095/28984/4147/5156/64066/1287/8516/7132/10211/4316
MF	GO:0005179	hormone activity	40	0.388589	2.16815	0.000810174	0.00815157	0.00574296	1441	tags=48%	list=19%	signal=39%	2200/183/51738/5443/1907/388581/7276/3827/3624/1081/116/3479/1908/5368/133/151176/1442/2201/51083
BP	GO:0051276	chromosome organization	218	0.225148	1.86788	0.000818738	0.00822143	0.00579218	2073	tags=39%	list=28%	signal=29%	699/1058/9928/6419/55125/91782/146909/57492/57405/7153/9787/7272/4751/332/8110/9493/11130/27030/10540/23397/605/1063/11004/9639/7203/84722/348654/1104/84944/245711/10269/7015/23381/51112/53918/5888/983/220134/84057/22974/11065/144165/55143/3021/7283/57650/125476/57520/3833/5892/3835/27183/8362/9700/51510/8352/8368/6604/9232/9319/990/8355/5347/54892/29127/3832/4439/8356/24137/675/7014/8294/64682/5…
BP	GO:0042088	T-helper 1 type immune response	26	0.458497	2.2001	0.00082161	0.00823397	0.00580101	403	tags=31%	list=5%	signal=29%	9173/149233/51176/8809/3554/3142/6504/7292
BP	GO:0045061	thymic T cell selection	14	0.575725	2.15784	0.000826008	0.00826171	0.00582056	779	tags=50%	list=10%	signal=45%	940/1236/915/2625/9760/917/916
BP	GO:0021766	hippocampus development	44	0.373731	2.15885	0.000828248	0.00826781	0.00582485	759	tags=30%	list=10%	signal=27%	9928/51176/306/4771/23035/583/84879/55624/7531/8648/238/63827/8195
CC	GO:0005819	spindle	173	0.238641	1.91304	0.000840633	0.00837496	0.00590034	2073	tags=40%	list=28%	signal=30%	259266/9928/8556/50852/1731/91782/146909/9787/4064/7272/4751/332/9493/23035/26586/7803/150468/1063/11004/79000/84722/57448/26009/64793/22920/5778/1639/114327/79848/79866/10112/983/220134/22974/81624/10381/55143/84617/23255/57553/3579/7283/57520/3833/11091/6569/3835/27183/9700/51510/990/85302/5347/29127/3832/57325/81610/3315/10474/24137/6871/8881/701/9212/22924/151648/9731/9903/199953/10459
MF	GO:0005518	collagen binding	29	0.441318	2.19941	0.000849309	0.00844479	0.00594954	1236	tags=48%	list=16%	signal=40%	9806/960/127435/4811/3339/4921/8515/4318/7448/1311/26577/131578/4060/7057
MF	GO:0004867	serine-type endopeptidase inhibitor activity	28	0.443698	2.16493	0.000856987	0.00849005	0.00598143	1305	tags=50%	list=17%	signal=41%	5265/183/5176/462/3699/8434/3698/5345/2/12/710/3700/3730/58189
BP	GO:0070848	response to growth factor	274	0.215499	1.84548	0.000857209	0.00849005	0.00598143	1633	tags=33%	list=22%	signal=27%	2200/4774/80310/2261/4681/51176/79652/960/116844/9404/2625/306/3725/183/26585/2321/54541/7049/3576/7538/9378/6272/3791/8425/91/2662/1996/4921/6464/63976/238/4656/57498/9241/53918/1385/6774/2887/7448/10468/83891/10563/1311/55816/22943/6423/25878/10631/6664/64399/25928/56937/3815/2050/8287/7429/7057/7010/2022/6347/7423/5076/2254/4093/10252/56975/2201/2252/7472/2674/652/5156/28514/65997/7291/8516/89…
MF	GO:0019838	growth factor binding	50	0.358416	2.14844	0.000863055	0.00852522	0.0060062	1504	tags=42%	list=20%	signal=34%	7850/2261/116844/2321/7049/3554/6272/3791/8425/91/6464/3485/2/10563/3815/7057/7010/2022/5156/5159/5046
BP	GO:0009611	response to wounding	210	0.231427	1.91145	0.000864122	0.00852522	0.0060062	1658	tags=35%	list=22%	signal=28%	4774/960/116844/5265/91782/140/2069/177/51330/5792/5581/3552/462/89781/7538/958/3932/128272/23499/3791/1832/6403/5051/5339/2192/3162/9860/4921/9241/959/1511/6774/3043/337/5345/6696/7448/3827/118812/2266/710/1311/84830/983/3479/350/2150/10894/8061/100506658/9068/7429/7057/2022/7076/7423/4192/58189/2252/23452/4147/5156/79987/7168/3818/7098/5624/27183/301/653145/51510/80856/1861
BP	GO:0001503	ossification	165	0.235105	1.87341	0.0008769	0.00863448	0.00608318	1644	tags=35%	list=22%	signal=28%	1901/9923/249/2261/51176/26585/9249/9636/6272/9451/3399/10507/91/2662/10269/2736/4921/23020/4656/5600/9241/6696/3485/1311/22943/6423/3479/1591/6664/197/374/651/144165/3400/3021/875/7010/4192/151176/2254/4093/56975/2201/9770/5745/652/7291/57419/8994/1051/4086/6569/847/79879/2737/8519/10272/5734
MF	GO:0030695	GTPase regulator activity	187	0.231027	1.87859	0.000883496	0.00868258	0.00611707	772	tags=18%	list=10%	signal=17%	25780/55103/55635/128239/10125/84079/9882/266747/3725/57480/10395/143872/79961/58504/89781/54206/23263/9639/128272/23179/6004/1104/9938/57449/163259/9462/9910/5877/23550/50649/10542/57572/57514/5996
BP	GO:0006953	acute-phase response	25	0.457286	2.15358	0.000891175	0.0087411	0.0061583	2865	tags=80%	list=38%	signal=50%	3240/5265/3552/5345/2/12/197/3700/9332/5005/1268/445/9536/1051/59307/5733/3570/325/1401/5743
BP	GO:0051960	regulation of nervous system development	177	0.236097	1.90166	0.000895458	0.00876616	0.00617595	2392	tags=46%	list=32%	signal=32%	54674/259266/9928/51176/84079/23500/4771/53335/274/5176/51738/79365/9378/9451/23499/57463/23175/58497/10507/10154/7161/22920/57142/9241/6696/22943/3976/6664/3400/3815/80237/23316/5783/10810/5365/4192/8530/2119/1075/7472/6387/28514/9037/1739/4311/5584/6091/6833/2737/55502/9175/6604/7074/3949/7097/2146/222223/6009/26022/5583/80128/400746/4914/375790/6497/388585/390992/54626/22883/2475/374946/7133/2…
BP	GO:1904063	negative regulation of cation transmembrane transport	24	0.47855	2.22371	0.000901678	0.00879766	0.00619815	821	tags=42%	list=11%	signal=37%	88/817/183/5581/274/150684/7531/845/55013/4318
BP	GO:0097435	supramolecular fiber organization	303	0.203611	1.75752	0.000902146	0.00879766	0.00619815	1472	tags=28%	list=20%	signal=24%	128239/1901/88/55125/51361/23500/7018/1236/1191/146909/4771/163782/26585/1545/4648/10395/26586/5581/274/6711/51738/10178/80206/11004/11346/9639/84722/4070/8425/79729/1832/58497/1266/5339/9938/3339/1639/4703/4921/79745/23127/1855/8195/122060/2934/335/5345/23075/4320/4430/1311/283208/6423/3872/220134/22974/81624/4060/2150/89927/7082/4606/55740/339768/57553/100506658/9026/10810/83543/7429/221692/283…
MF	GO:0060589	nucleoside-triphosphatase regulator activity	188	0.233845	1.90518	0.000938057	0.0091303	0.0064325	898	tags=20%	list=12%	signal=18%	25780/55103/55635/128239/10125/84079/9882/266747/3725/57480/10395/143872/79961/58504/89781/54206/23263/9639/128272/23179/6004/1104/9938/57449/163259/9462/9910/5877/23550/50649/10542/57572/57514/5996/53918/54885/23075/160518
BP	GO:0051701	biological process involved in interaction with host	54	0.346549	2.11644	0.000966414	0.00937057	0.00660177	1016	tags=33%	list=14%	signal=29%	1803/3434/91782/1380/6614/3576/6504/2060/81607/8764/2192/1604/1378/920/51297/9023/983/131578
CC	GO:0005768	endosome	392	0.194447	1.7123	0.000966438	0.00937057	0.00660177	1648	tags=30%	list=22%	signal=25%	26119/911/1901/23484/84079/344/91782/7018/1183/4771/3119/6614/2321/3115/51257/3118/255231/9214/274/79971/3117/57007/540/7803/3111/245972/155066/3122/2060/3716/9595/6272/4948/3791/5861/57448/3140/11311/55016/57535/5337/150684/83452/5551/9910/30845/10269/8291/10542/910/5590/23400/57498/23120/81615/64841/920/7782/335/55361/337/23062/933/83891/4430/3120/26872/22943/9388/81624/117/81611/2150/208/25825…
BP	GO:0050877	nervous system process	397	0.189408	1.67149	0.000984846	0.00953083	0.00671468	3274	tags=55%	list=44%	signal=33%	1901/8556/51176/54463/3983/332/9249/1687/177/79290/4648/4919/5176/5284/51738/583/9378/3122/83756/2140/9451/84879/7068/9699/4070/6004/23175/157506/55624/2034/84173/8704/5339/2780/1996/1639/391107/10269/6900/9860/391192/23261/130557/1261/431707/5590/51542/1855/9486/8195/9241/18/1385/5026/220/1311/5950/22943/81624/64478/5368/8867/4060/8061/152137/3759/339768/80781/4248/3815/23316/1268/10810/2628/634…
BP	GO:1903046	meiotic cell cycle process	80	0.307419	2.08679	0.00100492	0.00970653	0.00683847	3978	tags=79%	list=53%	signal=37%	259266/1731/7153/7272/2069/11130/27030/995/8900/23397/164045/84944/245711/2956/22887/122402/5888/220134/84057/3976/9088/124535/7283/7589/5892/9700/9232/9319/5347/4487/4439/675/151648/2827/51441/991/8438/55706/4438/676/388649/6847/84072/11022/83540/81626/56776/56603/10018/5000/9133/5889/2175/51547/286151/3619/57082/1164/2177/83990/56154/284071/221150
BP	GO:0030856	regulation of epithelial cell differentiation	64	0.327538	2.10499	0.00100808	0.00971857	0.00684695	3488	tags=73%	list=46%	signal=40%	100133941/51176/5920/2625/4610/3552/7538/54206/595/7161/4318/5613/10468/2810/3976/5076/10252/652/28514/4097/23764/1051/7132/5624/6935/4487/2146/2137/5583/360/388585/55966/126695/8643/2301/5317/50604/29841/9475/130497/7498/10736/200734/130120/84913/7849/7422
BP	GO:0030100	regulation of endocytosis	100	0.278211	2.0036	0.00101618	0.0097781	0.00688888	1835	tags=40%	list=24%	signal=31%	57126/26119/55061/55423/344/154664/7018/1191/26228/6401/26585/274/9829/22848/84058/8291/335/55333/2213/7448/933/3958/22943/197/2150/9026/6347/28514/1012/967/8976/10211/5657/146722/1861/5533/341/3601/5532/7097
CC	GO:0042175	nuclear outer membrane-endoplasmic reticulum membrane network	414	0.190067	1.68251	0.00102166	0.00981221	0.00691292	3542	tags=59%	list=47%	signal=33%	5738/5320/7039/10125/10901/54463/9840/129642/170575/113612/1183/57565/3119/817/9249/1545/3115/51257/3118/79971/91543/3117/23341/3122/3995/6272/9451/84879/118424/4948/253558/57198/23175/157506/79888/5051/54884/3140/87178/55016/57535/5337/3162/845/10269/57540/57142/1573/987/55650/7844/10130/64788/23120/2531/64078/920/54941/6231/201895/3120/9023/983/10170/7367/28965/13/9088/374/3127/79152/3113/15419…
BP	GO:0043542	endothelial cell migration	84	0.308071	2.12872	0.00103688	0.0099395	0.0070026	1500	tags=38%	list=20%	signal=31%	1803/9404/2625/306/183/26585/1545/7049/5176/958/9734/3791/8503/3964/3162/57449/1907/1647/10000/5613/335/55333/10563/84830/350/2050/7057/7010/28984/9037/1012/6091
BP	GO:0048609	multicellular organismal reproductive process	302	0.209405	1.80695	0.00105848	0.0101274	0.007135	1430	tags=29%	list=19%	signal=25%	90853/259266/1912/51361/1731/7153/7272/2069/1545/2352/27030/55342/3552/5176/51738/583/995/8900/23397/639/4948/7068/84058/200162/8654/80705/2662/84944/8648/245711/3814/2956/84217/92749/23139/136242/51542/164091/8195/22887/18/54585/9389/174/6696/10863/122402/10468/2/3624/170690/1081/771/220134/3479/3976/117/64478/23641/8061/1738/8653/3815/124535/80237/1268/8287/3021/875/199223/154197/4192/283/9468/…
BP	GO:0002369	T cell cytokine production	19	0.505232	2.16107	0.0010726	0.010224	0.007203	719	tags=42%	list=10%	signal=38%	2625/8809/3554/91543/6504/7292/1604/5590
BP	GO:0002724	regulation of T cell cytokine production	19	0.505232	2.16107	0.0010726	0.010224	0.007203	719	tags=42%	list=10%	signal=38%	2625/8809/3554/91543/6504/7292/1604/5590
BP	GO:0009790	embryo development	409	0.187883	1.65983	0.00107689	0.0102456	0.00721823	3431	tags=57%	list=46%	signal=33%	2200/6241/3899/9334/51176/2625/4317/4771/7153/4751/26585/65979/2321/3914/284723/10395/54855/79971/5723/3576/27042/3142/26227/9644/639/84172/824/3791/157506/3399/57448/2034/26009/91/8434/8575/8648/27245/2736/25949/57142/7709/2016/343263/51542/1855/57498/8195/9241/3212/23059/7289/51339/53918/4318/335/9620/7448/201895/2/220/1295/5950/3624/22943/983/6423/3479/3976/81624/6664/8061/1738/144165/51384/38…
BP	GO:0032735	positive regulation of interleukin-12 production	19	0.50471	2.15884	0.00108458	0.0102995	0.0072562	1835	tags=63%	list=24%	signal=48%	149233/1236/177/958/7292/5600/959/4192/3135/7098/3603/7097
BP	GO:0032615	interleukin-12 production	29	0.433533	2.16061	0.00110804	0.0104634	0.0073717	1835	tags=55%	list=24%	signal=42%	149233/1236/177/6504/958/7292/23139/5600/959/54/7057/4192/3135/7098/3603/7097
BP	GO:0032655	regulation of interleukin-12 production	29	0.433533	2.16061	0.00110804	0.0104634	0.0073717	1835	tags=55%	list=24%	signal=42%	149233/1236/177/6504/958/7292/23139/5600/959/54/7057/4192/3135/7098/3603/7097
CC	GO:0001533	cornified envelope	23	0.466148	2.13558	0.00110648	0.0104634	0.0073717	2894	tags=83%	list=39%	signal=51%	1832/23254/1823/3872/301/1475/3849/3315/7062/126638/388697/2312/388698/353134/3713/6698/6707/6705/5317
CC	GO:0070161	anchoring junction	332	0.203178	1.76406	0.0011137	0.0104974	0.00739562	803	tags=17%	list=11%	signal=16%	914/128239/9173/88/2261/3702/1803/387357/79652/960/4008/57125/9404/4771/9493/2321/10395/10207/2703/2273/6282/58504/261734/11346/9644/3716/8462/81607/824/963/3791/10806/1832/58497/5586/595/1266/5339/9578/7531/23254/57449/3339/30845/6513/23114/84966/57142/4921/8394/6464/10256/5590/57514/916/1823/8631
BP	GO:0061640	cytoskeleton-dependent cytokinesis	48	0.353991	2.08438	0.00113991	0.0107179	0.00755098	2164	tags=52%	list=29%	signal=37%	128239/1058/1731/91782/332/54443/9493/26586/6711/5339/114327/151011/10112/55143/27183/9700/51510/11113/5347/29127/24137/9212/55752/7798/3925
BP	GO:0002418	immune response to tumor cell	12	0.577617	2.06467	0.00114132	0.0107179	0.00755098	716	tags=50%	list=10%	signal=45%	56253/1687/3140/5551/100507436/11126
BP	GO:0043031	negative regulation of macrophage activation	10	0.617016	2.03654	0.0011476	0.0107569	0.0075785	2882	tags=100%	list=38%	signal=62%	11326/2213/8530/221395/671/3949/80149/284467/23208/5788
CC	GO:0001772	immunological synapse	26	0.451552	2.16678	0.00115025	0.0107618	0.00758196	1804	tags=58%	list=24%	signal=44%	940/56253/3932/3122/963/5551/923/916/8631/3958/951/1739/27040/3001/490
BP	GO:0010817	regulation of hormone levels	186	0.229247	1.86292	0.00115979	0.0108311	0.00763073	1580	tags=34%	list=21%	signal=28%	1803/10901/6571/2625/183/9249/1545/5581/51738/5443/5208/9699/5861/157506/8425/54884/65220/3814/10269/9563/388581/9486/18/1511/1385/174/640/6696/2266/27445/1359/220/5950/3624/1081/1734/116/10170/3976/7367/6664/1908/2150/25825/1268/133/590/5156/124/10699/125/59338/8509/4311/51083/6716/5007/5046/23428/10202/6833/2775/1735/301
BP	GO:0051785	positive regulation of nuclear division	23	0.462418	2.11849	0.00116503	0.01086	0.00765113	1888	tags=61%	list=25%	signal=46%	7039/940/9787/2069/3552/220134/3479/1908/11065/28984/5159/9700/4487/8881
MF	GO:0140993	histone modifying activity	251	0.217652	1.84304	0.00117244	0.0109091	0.00768567	2172	tags=40%	list=29%	signal=30%	699/11240/2261/8556/3702/6419/84864/7272/4751/2321/5792/23035/9829/22848/995/7803/56950/3932/3716/9869/2140/9451/3791/5784/54935/8491/9578/8648/7799/5778/83931/4921/64754/63976/238/81788/23139/282974/10000/5613/640/5616/55872/983/1033/208/9088/8284/3815/2050/5783/7404/7010/26040/7403/54101/8242/56975/85464/5156/147699/5159/11091/10106/1850/2534/2041/55313/9891/11113/5533/7468/23081/5796/80895/553…
BP	GO:0021543	pallium development	80	0.303888	2.06282	0.001184	0.0109965	0.00774728	759	tags=24%	list=10%	signal=22%	259266/9928/10642/51176/306/4771/23035/583/84879/55624/7531/8648/6513/57142/238/114327/2016/63827/8195
CC	GO:0005789	endoplasmic reticulum membrane	407	0.188195	1.663	0.00118733	0.0110072	0.00775485	3334	tags=56%	list=44%	signal=33%	5738/5320/7039/10125/10901/54463/9840/129642/170575/113612/1183/57565/3119/817/9249/1545/3115/51257/3118/79971/91543/3117/23341/3122/3995/6272/9451/84879/118424/4948/253558/57198/23175/157506/79888/5051/54884/3140/87178/55016/57535/5337/3162/845/10269/57540/57142/1573/987/55650/7844/10130/64788/23120/2531/64078/920/54941/6231/201895/3120/9023/983/10170/7367/28965/13/9088/374/3127/79152/3113/15419…
MF	GO:0030371	translation repressor activity	16	-0.451837	-2.17256	0.00119425	0.0110512	0.0077858	2104	tags=75%	list=28%	signal=54%	693137/100126334/407033/51247/23191/693135/406959/442904/80315/7866/406986/406991
MF	GO:0002020	protease binding	57	0.342919	2.12182	0.0012004	0.0110677	0.00779745	2135	tags=53%	list=28%	signal=38%	57126/1803/5265/3554/274/462/943/9644/58484/374291/1991/1511/55024/5345/2/1311/2150/3815/7057/7076/219743/56975/10211/1475/3949/596/675/7273/11315/65018
BP	GO:0071675	regulation of mononuclear cell migration	56	0.33989	2.09747	0.0012004	0.0110677	0.00779745	1367	tags=38%	list=18%	signal=31%	80310/11240/4681/257144/1236/26228/26585/177/57402/6504/8764/57142/131450/10563/3958/84830/7057/6347/4192/6387/5919
BP	GO:0006629	lipid metabolic process	474	0.183132	1.64045	0.00120574	0.0110967	0.00781791	3759	tags=61%	list=50%	signal=33%	26119/204962/5320/9334/225/5019/10901/64919/7357/129642/344/5920/113612/1191/80183/6097/9249/1545/1593/126969/5581/29881/3552/2172/26751/3613/84513/54206/3995/824/23683/84879/253558/3990/23175/157506/8503/79888/5051/54884/34/5337/3339/284486/55289/127281/10269/57540/1573/1907/9563/3953/8394/9890/238/51542/55650/57217/9486/80821/64788/2531/55301/1385/174/317749/335/55361/337/114884/6696/866/5244/2…
BP	GO:0042572	retinol metabolic process	17	0.515015	2.11205	0.00121629	0.0111736	0.00787201	1389	tags=59%	list=18%	signal=48%	10901/9249/1545/157506/54884/220/5950/10170/124/125
BP	GO:0007160	cell-matrix adhesion	90	0.291494	2.04857	0.00122648	0.0112468	0.00792364	3661	tags=71%	list=49%	signal=37%	88/3680/10225/4680/960/1236/4771/6614/26585/10395/4811/23499/3791/8394/8515/5590/916/8631/158326/7448/2266/10631/10894/7057/7010/79987/8516/7402/1012/967/2041/7074/5796/8573/3655/596/5786/123720/55966/55920/1307/10420/27329/7412/1435/8751/7059/4653/63923/947/27185/9475/11117/11037/51057/9448/10018/57669/23332/3694/7422/9647/7264/83700
BP	GO:0002700	regulation of production of molecular mediator of immune response	87	0.290824	2.03274	0.0012291	0.0112505	0.00792622	1887	tags=43%	list=25%	signal=32%	940/10225/2625/8809/51237/115352/3554/91543/6504/958/7292/8764/1604/57142/1378/11126/5590/959/335/2213/933/3263/5950/54/2150/3815/972/5553/7291/10417/3135/7098/30009/7468/9466/4615/115004
BP	GO:0038145	macrophage colony-stimulating factor signaling pathway	27	0.441859	2.13904	0.00124908	0.0114127	0.00804052	2709	tags=74%	list=36%	signal=48%	2261/26228/2321/3791/4921/238/3815/2050/7010/5156/5159/2041/4914/1969/2046/2048/284656/7075/1435/3645
BP	GO:0001763	morphogenesis of a branching structure	75	0.302014	2.02346	0.00126224	0.0115122	0.00811062	1400	tags=39%	list=19%	signal=32%	51176/183/53335/26585/639/3791/4070/157506/2736/57142/473/9241/9620/170690/6423/64399/64478/374/2022/4192/133/5076/6943/10252/2252/7472/652/10512/1739
BP	GO:0010001	glial cell differentiation	101	0.284177	2.05094	0.00126514	0.011518	0.0081147	2084	tags=46%	list=28%	signal=33%	4774/9334/51176/23500/1191/177/712/4919/274/2840/26227/9639/5339/7161/6900/2016/51542/9241/6774/7448/983/3976/6664/208/3400/79152/93377/10810/4192/5076/28514/1000/2737/3949/7097/4615/6009/6659/26022/400746/54587/6497/388585/80045/2475/7133
BP	GO:0090630	activation of GTPase activity	16	0.534649	2.1453	0.00126869	0.0115296	0.00812286	2440	tags=81%	list=32%	signal=55%	10125/143872/9639/8394/10563/2041/202243/7074/253959/27237/1969/85440/84144
BP	GO:0000281	mitotic cytokinesis	36	0.398834	2.15837	0.00127419	0.0115589	0.00814347	1903	tags=53%	list=25%	signal=40%	128239/1058/91782/332/54443/9493/26586/6711/114327/10112/55143/27183/9700/51510/11113/5347/29127/24137/9212
BP	GO:0045859	regulation of protein kinase activity	117	0.263024	1.96238	0.00128624	0.0116474	0.00820585	1725	tags=38%	list=23%	signal=29%	2200/9928/100133941/10125/1236/183/2069/2321/63967/995/10178/28951/54206/84722/595/64793/245711/4921/1116/1991/1647/920/2810/116/22974/3479/1033/1908/9088/285489/7057/9770/28984/5997/57214/5159/6091/7098/27040/64798/2041/9175/990/5347
BP	GO:0003006	developmental process involved in reproduction	329	0.195776	1.69977	0.00129778	0.0117309	0.00826469	1496	tags=29%	list=20%	signal=25%	90853/259266/1912/249/51361/2625/2069/1545/55342/3552/5176/51738/583/995/8900/54206/639/6382/7100/4948/3791/157506/200162/8654/80705/7022/84944/8648/245711/2956/84217/92749/431707/23139/51542/164091/8195/22887/9241/54585/9389/174/6696/10863/122402/10468/2/5950/3624/1081/6423/3479/3976/117/64478/23641/374/1738/6874/3400/3815/124535/80237/1268/8287/3021/199223/154197/4192/283/55840/9468/389763/6067…
MF	GO:0005003	ephrin receptor activity	27	0.440983	2.1348	0.00131783	0.0118488	0.00834774	2709	tags=74%	list=36%	signal=48%	2261/2321/3791/2051/4921/238/3815/2050/7010/5156/5159/2041/4914/1969/2046/2048/284656/7075/1944/3645
MF	GO:0005005	transmembrane-ephrin receptor activity	27	0.440983	2.1348	0.00131783	0.0118488	0.00834774	2709	tags=74%	list=36%	signal=48%	2261/2321/3791/2051/4921/238/3815/2050/7010/5156/5159/2041/4914/1969/2046/2048/284656/7075/1944/3645
BP	GO:0046621	negative regulation of organ growth	12	0.572724	2.04719	0.0013162	0.0118488	0.00834774	1380	tags=67%	list=18%	signal=55%	221476/7161/5600/9241/9868/5950/1081/5997
BP	GO:0035265	organ growth	64	0.323311	2.07783	0.00132051	0.0118519	0.0083499	1380	tags=38%	list=18%	signal=31%	1901/2261/3574/7049/3142/221476/84944/7161/10269/4921/3953/5600/9241/9868/1311/5950/983/1081/3479/2254/2252/7472/28514/5997
CC	GO:0005788	endoplasmic reticulum lumen	131	0.256362	1.95459	0.00133102	0.0119251	0.00840151	1447	tags=34%	list=19%	signal=28%	2200/80310/11320/5265/7018/1191/1310/51237/462/51738/3990/845/64222/9563/23127/10130/10418/174/920/335/3698/337/6696/7448/3827/2266/710/1295/283208/1288/197/80781/7057/7076/1075/11096/56975/590/652/1000/1287/1066/81578/29106/55033
BP	GO:0032094	response to food	13	0.570861	2.11089	0.00133581	0.0119469	0.00841688	759	tags=46%	list=10%	signal=42%	2200/4353/51738/583/5339/8195
BP	GO:0048146	positive regulation of fibroblast proliferation	22	0.472012	2.12079	0.00135317	0.0120145	0.00846449	1406	tags=55%	list=19%	signal=44%	80310/183/2069/2192/4921/3479/3976/1869/972/7472/5156/890
MF	GO:0005004	GPI-linked ephrin receptor activity	25	0.444344	2.09263	0.00139312	0.0120145	0.00846449	2297	tags=68%	list=31%	signal=47%	2261/2321/3791/4921/238/3815/2050/7010/5156/5159/2041/4914/1969/2046/2048/284656/7075
MF	GO:0005006	epidermal growth factor receptor activity	25	0.444344	2.09263	0.00139312	0.0120145	0.00846449	2297	tags=68%	list=31%	signal=47%	2261/2321/3791/4921/238/3815/2050/7010/5156/5159/2041/4914/1969/2046/2048/284656/7075
MF	GO:0005007	fibroblast growth factor receptor activity	25	0.444344	2.09263	0.00139312	0.0120145	0.00846449	2297	tags=68%	list=31%	signal=47%	2261/2321/3791/4921/238/3815/2050/7010/5156/5159/2041/4914/1969/2046/2048/284656/7075
MF	GO:0005008	hepatocyte growth factor receptor activity	25	0.444344	2.09263	0.00139312	0.0120145	0.00846449	2297	tags=68%	list=31%	signal=47%	2261/2321/3791/4921/238/3815/2050/7010/5156/5159/2041/4914/1969/2046/2048/284656/7075
MF	GO:0005009	insulin receptor activity	25	0.444344	2.09263	0.00139312	0.0120145	0.00846449	2297	tags=68%	list=31%	signal=47%	2261/2321/3791/4921/238/3815/2050/7010/5156/5159/2041/4914/1969/2046/2048/284656/7075
MF	GO:0005011	macrophage colony-stimulating factor receptor activity	25	0.444344	2.09263	0.00139312	0.0120145	0.00846449	2297	tags=68%	list=31%	signal=47%	2261/2321/3791/4921/238/3815/2050/7010/5156/5159/2041/4914/1969/2046/2048/284656/7075
MF	GO:0005018	platelet-derived growth factor alpha-receptor activity	25	0.444344	2.09263	0.00139312	0.0120145	0.00846449	2297	tags=68%	list=31%	signal=47%	2261/2321/3791/4921/238/3815/2050/7010/5156/5159/2041/4914/1969/2046/2048/284656/7075
MF	GO:0005020	stem cell factor receptor activity	25	0.444344	2.09263	0.00139312	0.0120145	0.00846449	2297	tags=68%	list=31%	signal=47%	2261/2321/3791/4921/238/3815/2050/7010/5156/5159/2041/4914/1969/2046/2048/284656/7075
MF	GO:0005021	vascular endothelial growth factor receptor activity	25	0.444344	2.09263	0.00139312	0.0120145	0.00846449	2297	tags=68%	list=31%	signal=47%	2261/2321/3791/4921/238/3815/2050/7010/5156/5159/2041/4914/1969/2046/2048/284656/7075
MF	GO:0008288	boss receptor activity	25	0.444344	2.09263	0.00139312	0.0120145	0.00846449	2297	tags=68%	list=31%	signal=47%	2261/2321/3791/4921/238/3815/2050/7010/5156/5159/2041/4914/1969/2046/2048/284656/7075
BP	GO:0036215	response to stem cell factor	25	0.444344	2.09263	0.00139312	0.0120145	0.00846449	2297	tags=68%	list=31%	signal=47%	2261/2321/3791/4921/238/3815/2050/7010/5156/5159/2041/4914/1969/2046/2048/284656/7075
BP	GO:0036216	cellular response to stem cell factor stimulus	25	0.444344	2.09263	0.00139312	0.0120145	0.00846449	2297	tags=68%	list=31%	signal=47%	2261/2321/3791/4921/238/3815/2050/7010/5156/5159/2041/4914/1969/2046/2048/284656/7075
BP	GO:0036323	vascular endothelial growth factor receptor-1 signaling pathway	25	0.444344	2.09263	0.00139312	0.0120145	0.00846449	2297	tags=68%	list=31%	signal=47%	2261/2321/3791/4921/238/3815/2050/7010/5156/5159/2041/4914/1969/2046/2048/284656/7075
MF	GO:0036332	placental growth factor receptor activity	25	0.444344	2.09263	0.00139312	0.0120145	0.00846449	2297	tags=68%	list=31%	signal=47%	2261/2321/3791/4921/238/3815/2050/7010/5156/5159/2041/4914/1969/2046/2048/284656/7075
MF	GO:0038062	protein tyrosine kinase collagen receptor activity	25	0.444344	2.09263	0.00139312	0.0120145	0.00846449	2297	tags=68%	list=31%	signal=47%	2261/2321/3791/4921/238/3815/2050/7010/5156/5159/2041/4914/1969/2046/2048/284656/7075
BP	GO:0038109	Kit signaling pathway	25	0.444344	2.09263	0.00139312	0.0120145	0.00846449	2297	tags=68%	list=31%	signal=47%	2261/2321/3791/4921/238/3815/2050/7010/5156/5159/2041/4914/1969/2046/2048/284656/7075
MF	GO:0060175	brain-derived neurotrophic factor receptor activity	25	0.444344	2.09263	0.00139312	0.0120145	0.00846449	2297	tags=68%	list=31%	signal=47%	2261/2321/3791/4921/238/3815/2050/7010/5156/5159/2041/4914/1969/2046/2048/284656/7075
BP	GO:0019722	calcium-mediated signaling	90	0.288438	2.02709	0.00138347	0.0120145	0.00846449	1876	tags=42%	list=25%	signal=32%	11123/50852/1236/817/6401/643/255231/3576/57007/5443/9451/845/10269/1907/23261/576/916/920/933/5026/3479/3579/6444/5156/8989/11251/1012/5159/1237/27040/2892/552/5533/121665/5532/1233/8445/9034
BP	GO:0002009	morphogenesis of an epithelium	173	0.232	1.85981	0.0013722	0.0120145	0.00846449	3421	tags=63%	list=46%	signal=35%	51176/960/116844/2625/183/26585/65979/10395/3791/9687/4070/157506/2736/1855/8195/92344/9241/1823/3212/26249/23059/7289/5613/9620/10468/220/170690/6423/3872/3976/6664/64399/64478/25928/374/144165/3400/51384/2022/4192/3579/54101/133/5076/6943/2295/10252/2252/7472/652/94234/28514/7291/10512/1739/10890/2737/55764/123016/1861/90410/596/23322/200894/10370/6497/388585/55966/388591/5293/2475/4524/10630/1…
CC	GO:0098827	endoplasmic reticulum subcompartment	408	0.189084	1.67077	0.001353	0.0120145	0.00846449	3334	tags=56%	list=44%	signal=33%	5738/5320/7039/10125/10901/54463/9840/129642/170575/113612/1183/57565/3119/817/9249/1545/3115/51257/3118/79971/91543/3117/23341/3122/3995/6272/9451/84879/118424/4948/253558/57198/23175/157506/79888/5051/54884/3140/87178/55016/57535/5337/3162/845/10269/57540/57142/1573/987/55650/7844/10130/64788/23120/2531/64078/920/54941/6231/201895/3120/9023/983/10170/7367/28965/13/9088/374/3127/79152/3113/15419…
BP	GO:0006801	superoxide metabolic process	28	0.432023	2.10796	0.00139876	0.0120334	0.00847777	1375	tags=46%	list=18%	signal=38%	57126/4353/183/5581/4688/9644/6464/337/84329/54/2150/875/114757
CC	GO:0000793	condensed chromosome	101	0.283443	2.04564	0.00140035	0.0120334	0.00847777	712	tags=22%	list=9%	signal=20%	699/1058/6419/91782/57405/7153/7272/4751/332/4288/11130/27030/10540/23397/1063/11004/25909/253635/1104/22920/1639/51112
MF	GO:0005543	phospholipid binding	198	0.223098	1.83028	0.00140243	0.0120334	0.00847777	1592	tags=32%	list=21%	signal=26%	26119/5320/88/10125/26207/306/728113/80183/26228/1687/57699/274/6711/26751/9644/23263/54477/5051/84069/5337/150684/56270/8291/307/23550/23612/6464/440738/23400/7289/2934/335/337/23062/114884/79856/92017/83891/4430/27445/3507/1048/3512/350/116987/3759/9026/7429/7057/9468/8436/115703/59338/4311/5217/5584/5007/2215/64798/25851/301/653145/8904
BP	GO:0018212	peptidyl-tyrosine modification	76	0.308206	2.06472	0.00140593	0.012043	0.00848457	1615	tags=41%	list=22%	signal=32%	7039/2261/26585/2321/54206/3932/3791/10507/8784/4921/238/5590/916/920/55024/640/7448/6423/3479/3976/374/3815/285489/7423/2252/2674/5156/4254/5159/2534/2041
BP	GO:0048608	reproductive structure development	119	0.269649	2.0153	0.0014167	0.0121148	0.00853516	1537	tags=38%	list=20%	signal=31%	259266/2625/2069/1545/3552/5176/54206/6382/7100/3791/157506/7022/8648/431707/8195/9241/174/10468/2/5950/3624/1081/6423/64478/6874/3400/3815/3021/283/55840/9468/6943/2295/2254/9510/2674/652/5156/4254/1739/59338/1396/6716/1051/7098
CC	GO:0016323	basolateral plasma membrane	94	0.277605	1.96707	0.00141969	0.01212	0.00853878	3377	tags=68%	list=45%	signal=38%	7039/960/7049/540/1832/5031/6513/3953/340547/1048/771/3773/338328/6579/7082/11309/64116/7010/353189/5745/30061/9120/1000/1739/10211/23428/2030/301/8573/3949/490/6526/9497/3320/360/55966/10630/1187/1188/2035/149461/6536/7809/57554/6814/6566/476/23632/89872/57127/912/3766/481/493/25778/1131/9381/8884/4072/525/57835/150696/26504/389015
BP	GO:0048878	chemical homeostasis	359	0.190747	1.66633	0.00142664	0.0121588	0.00856612	2210	tags=38%	list=29%	signal=28%	2200/26119/249/100133941/344/7018/1236/817/183/177/7174/5581/29881/3552/5176/57402/51738/5443/540/245972/155066/958/54206/3932/9734/4948/3791/3990/51027/79888/2034/150684/391059/3162/29116/5031/7531/65220/845/57540/11330/57142/1907/3953/284612/51542/57217/388581/23400/54896/26249/55013/1991/6774/335/337/930/84329/5244/3263/51297/2167/5950/771/9388/23627/64478/338328/1908/25825/3759/1268/4884/6368…
BP	GO:0040018	positive regulation of multicellular organism growth	10	0.610454	2.01488	0.00143033	0.0121698	0.00857387	1820	tags=80%	list=24%	signal=61%	51738/583/8195/1385/7429/1735/5357/596
BP	GO:0071695	anatomical structure maturation	80	0.299592	2.03366	0.00144269	0.0122506	0.00863084	1339	tags=34%	list=18%	signal=28%	9928/1901/2261/9334/2625/53335/26585/2069/712/3791/2034/10507/8434/6900/473/9389/2266/5026/3479/81624/1738/3021/283/5076/56975/5745/342035
BP	GO:0021537	telencephalon development	113	0.264099	1.95462	0.00144466	0.0122506	0.00863084	2147	tags=43%	list=29%	signal=31%	259266/9928/10642/51176/64919/306/4771/23035/583/84879/55624/7531/8648/6513/6900/57142/23334/238/114327/2016/63827/8195/220/3624/140679/89927/3400/91584/221692/4192/6387/652/1000/6716/6091/482/2737/123016/552/23322/2146/3251/200894/26153/6497/388585/374946/3362/2048
BP	GO:0030101	natural killer cell activation	46	0.354758	2.07365	0.00145363	0.0122994	0.00866519	716	tags=26%	list=10%	signal=24%	914/149233/4068/10125/8809/9760/6504/257101/639/962/100507436/11126
BP	GO:0140013	meiotic nuclear division	73	0.31181	2.06943	0.00145526	0.0122994	0.00866519	3978	tags=79%	list=53%	signal=38%	259266/1731/7153/7272/2069/11130/27030/8900/23397/164045/84944/245711/22887/122402/5888/220134/84057/3976/124535/7589/5892/9700/9232/9319/5347/4487/4439/675/151648/2827/991/8438/55706/4438/676/388649/6847/84072/11022/83540/81626/56776/56603/10018/5000/9133/5889/2175/51547/286151/3619/57082/1164/2177/83990/56154/284071/221150
BP	GO:0036006	cellular response to macrophage colony-stimulating factor stimulus	29	0.425485	2.1205	0.00145831	0.0123046	0.00866887	2709	tags=72%	list=36%	signal=46%	2261/26228/2321/3791/4921/238/3815/2050/7010/5156/5159/2041/7097/4914/1969/2046/2048/284656/7075/1435/3645
BP	GO:0043268	positive regulation of potassium ion transport	23	0.458257	2.09943	0.00147084	0.0123897	0.00872885	2797	tags=78%	list=37%	signal=49%	88/2273/57463/3779/1908/3759/1739/51083/6833/482/3783/29843/196527/4878/126755/9722/440699/481
BP	GO:2000514	regulation of CD4-positive alpha-beta T cell activation	41	0.369416	2.08019	0.00148297	0.0124505	0.00877167	1786	tags=46%	list=24%	signal=36%	149233/940/2625/177/9308/3142/3122/7292/1604/11126/5590/916/57630/384/64115/10538/301/30009/2033
CC	GO:0045178	basal part of cell	121	0.262655	1.96486	0.00148139	0.0124505	0.00877167	3421	tags=66%	list=46%	signal=37%	26119/7039/3680/960/7018/7049/540/2060/4070/1832/5031/6513/3953/340547/1048/771/3773/338328/6579/7082/9963/11309/64116/7010/353189/5745/30061/9120/1000/1739/10211/23428/2030/301/8573/3949/490/6526/9497/4891/3320/360/55966/10630/1187/1188/2035/127700/9132/149461/6536/7809/85440/57554/9635/6814/6566/476/23632/89872/57127/912/3766/55811/481/493/25778/947/1131/1838/9381/8884/4072/200504/525/57835/150…
BP	GO:0071219	cellular response to molecule of bacterial origin	92	0.282014	1.9952	0.00149168	0.012503	0.00880862	1629	tags=38%	list=22%	signal=30%	4317/4064/26228/8564/79931/5581/3552/3576/129607/7538/958/7292/2635/824/7100/1604/923/1511/1669/4318/81793/2213/10563/6374/23641/5197/6347/820/4314/445/10417/4283/671/4795/51510
BP	GO:0005975	carbohydrate metabolic process	198	0.222031	1.82153	0.00151388	0.0126681	0.00892497	843	tags=19%	list=11%	signal=17%	1118/2200/1117/9334/2592/8972/57134/80183/6097/54541/4837/51738/5443/55276/54206/280/5208/84676/34/8704/56270/5031/2820/6513/2582/83931/10269/9563/6518/3953/57103/388581/80896/9486/9469/1116/6774/2887
BP	GO:0062013	positive regulation of small molecule metabolic process	55	0.343229	2.10846	0.00151664	0.0126703	0.0089265	3633	tags=78%	list=48%	signal=41%	26119/225/344/4837/157506/5031/57103/55022/335/337/3479/117/208/79660/5366/972/4923/133/5745/7291/1066/11091/552/5255/8445/57673/11315/2475/65018/5724/5563/405/51744/55811/5743/553/9926/3973/57223/2168/51547/9619/1407
BP	GO:0042692	muscle cell differentiation	168	0.236553	1.88953	0.00152309	0.0127033	0.00894974	1985	tags=40%	list=26%	signal=30%	5738/88/79652/26585/2069/93145/4811/274/79365/80206/688/6382/824/6272/9734/963/34/5339/221476/10269/4703/64754/284612/4656/5600/9868/1048/1311/22943/983/3479/144165/4606/30846/3815/3021/2022/133/2254/11096/6444/652/5156/28514/1000/5997/84814/8516/7168/5159/4086/10211/4283/6935/2627/552/6604/10467/90410/4487/5532/596/2146/10529/9043/7273/4629
MF	GO:0022857	transmembrane transporter activity	363	0.189748	1.6602	0.00155549	0.0129522	0.00912512	3387	tags=58%	list=45%	signal=33%	204962/777/225/154664/6571/1183/1687/126969/340273/255231/6574/2703/4707/540/245972/155066/3772/84879/55248/4948/5192/131096/245973/5551/94097/6513/284613/127124/8514/29957/6518/57657/1261/23400/54896/50651/57685/374291/9868/8645/9389/64078/93109/3779/7782/84329/5244/2556/3263/5026/2167/5950/3773/28965/6579/140679/348938/283537/3759/6565/206358/23413/9963/89874/56479/11309/64116/353189/7225/30061…
BP	GO:0042116	macrophage activation	45	0.372413	2.1581	0.0015671	0.0129638	0.00913325	1835	tags=49%	list=24%	signal=37%	9173/1191/4317/26228/177/712/5581/11326/9111/8291/1907/55013/2213/972/7057/8530/1075/221395/7098/671/3949/7097
MF	GO:0001637	G protein-coupled chemoattractant receptor activity	11	0.613714	2.10373	0.00156575	0.0129638	0.00913325	1996	tags=82%	list=27%	signal=60%	1236/643/2840/57007/3579/1237/1233/9034/10936
MF	GO:0004950	chemokine receptor activity	11	0.613714	2.10373	0.00156575	0.0129638	0.00913325	1996	tags=82%	list=27%	signal=60%	1236/643/2840/57007/3579/1237/1233/9034/10936
BP	GO:0002691	regulation of cellular extravasation	17	0.509704	2.09027	0.00156012	0.0129638	0.00913325	1823	tags=65%	list=24%	signal=49%	80310/6401/177/3554/6403/1991/10894/4192/6387/5734/9466
MF	GO:0019901	protein kinase binding	237	0.22121	1.86503	0.0015818	0.013064	0.00920389	1966	tags=37%	list=26%	signal=28%	914/9928/100133941/940/50852/919/257144/7153/26228/925/53335/995/10540/28951/7538/54900/54206/3932/842/5208/9734/5784/1832/595/7161/10746/245711/26052/1639/987/4660/6464/5590/1855/3595/923/916/8631/51339/6774/920/29760/55024/8115/79866/10112/2810/22974/285489/400581/5575/28984/8436/1000/1739/115703/890/7402/80174/2305/5159/4086/27040/23542/2627/2041/162/552/9175/11113/22866/5347/7074/2869/3601/57…
BP	GO:0046620	regulation of organ growth	33	0.414791	2.18763	0.00160376	0.0131954	0.00929643	1380	tags=48%	list=18%	signal=40%	3574/7049/3142/221476/84944/7161/5600/9241/9868/5950/983/1081/3479/2254/7472/5997
BP	GO:0072577	endothelial cell apoptotic process	24	0.466057	2.16566	0.00160181	0.0131954	0.00929643	1532	tags=58%	list=20%	signal=47%	2625/958/3791/7015/11126/959/2266/7057/7010/6347/28984/9037/5584/3135
BP	GO:0002701	negative regulation of production of molecular mediator of immune response	17	0.509256	2.08843	0.00160926	0.0131954	0.00929643	1688	tags=65%	list=22%	signal=50%	10225/115352/6504/1378/335/2213/933/54/5553/7291/30009
MF	GO:0070851	growth factor receptor binding	54	0.336417	2.05456	0.00160999	0.0131954	0.00929643	3559	tags=74%	list=47%	signal=39%	80310/149233/7039/2625/26585/2069/3574/3552/3554/9378/7100/6464/931/374/7423/2254/2252/5156/5159/2534/146722/6503/4615/9048/11146/10451/1893/3570/23385/6868/6654/55704/27178/56300/27179/27177/26525/84639/7422/3557
BP	GO:0009628	response to abiotic stimulus	418	0.187222	1.66031	0.00161071	0.0131954	0.00929643	2081	tags=37%	list=28%	signal=28%	4353/100133941/1803/55159/2625/60676/8564/177/54541/55342/5581/7049/3552/5176/5723/51738/943/261734/958/51514/9378/3310/842/2140/824/9451/51455/7100/49860/84676/10628/2034/84069/595/34/8704/8491/5339/3162/7531/100507436/2780/10746/3339/6513/10269/2956/57142/4921/57103/7015/50809/4656/8195/5600/9241/18/1116/1991/4318/1647/3779/2934/84329/3485/5888/5026/3624/55872/29923/6423/9768/10631/3479/3976/20…
BP	GO:0001822	kidney development	131	0.253554	1.93318	0.00161421	0.0132027	0.0093016	1840	tags=40%	list=25%	signal=31%	2200/80310/100133941/2625/183/26585/4811/5176/1063/639/842/6382/4070/157506/3399/7161/10269/2736/9241/26249/4318/5613/170690/3976/6664/384/7010/3579/5076/6943/9510/10252/2674/445/652/5156/28514/8516/1739/4311/5159/38/4086/6569/847/2737/162/3070/90410/596/23322/2146
CC	GO:0042827	platelet dense granule	11	0.612154	2.09838	0.00161751	0.0132084	0.00930558	1482	tags=73%	list=20%	signal=58%	3959/3699/89781/6403/350/3700/5919/967
BP	GO:0042445	hormone metabolic process	83	0.293784	2.02426	0.00163111	0.013298	0.00936873	1547	tags=41%	list=21%	signal=33%	1803/10901/2625/9249/1545/157506/54884/10269/9563/9486/1511/174/6696/220/5950/3624/1081/1734/10170/7367/25825/133/590/5156/124/10699/125/59338/4311/51083/6716/5046/10202/1735
MF	GO:0005201	extracellular matrix structural constituent	81	0.298837	2.04598	0.00164734	0.0134088	0.0094468	3182	tags=67%	list=42%	signal=39%	2200/1310/3914/127435/4811/8425/2192/3339/10418/1116/920/7448/2266/1311/1295/25878/10631/1288/4060/80781/3730/7057/5553/2201/4147/1287/81578/7045/375790/64856/4237/4146/64129/1307/1296/1298/3491/255631/1301/1893/7286/7059/1805/3915/3918/83872/10216/5549/26254/57829/7837/4148/11117/4052
CC	GO:0031091	platelet alpha granule	43	0.3788	2.16886	0.00168945	0.0137295	0.00967275	1241	tags=44%	list=17%	signal=37%	88/5265/1191/7044/6403/1675/5345/3827/2266/2/12/710/3479/197/1/5005/7057/7076/7423
BP	GO:0042102	positive regulation of T cell proliferation	46	0.349391	2.04228	0.00172553	0.0140003	0.0098635	1156	tags=35%	list=15%	signal=30%	149233/100133941/940/177/3115/3552/6504/7292/1604/923/916/959/3485/3479/115650/3113
BP	GO:2000377	regulation of reactive oxygen species metabolic process	51	0.34852	2.10393	0.00172879	0.0140043	0.00986632	1472	tags=41%	list=20%	signal=33%	57126/225/10901/3240/6571/183/1545/5581/57103/6464/1647/55022/84329/54/2150/384/7057/5076/4314/2305/5159
MF	GO:0048306	calcium-dependent protein binding	33	0.41194	2.17259	0.00173648	0.0140442	0.00989443	2647	tags=67%	list=35%	signal=43%	57126/306/6274/6282/57402/9378/49860/6403/845/307/2/5648/301/10747/64766/7804/338324/645922/6278/6276/6275/6273
BP	GO:0019079	viral genome replication	44	0.357359	2.06428	0.00174843	0.0141183	0.00994666	1954	tags=50%	list=26%	signal=37%	4774/940/3434/7153/91543/3576/9636/6041/5586/10542/9582/6347/2040/4599/25827/1487/8519/3429/5094/596/128637/200316
BP	GO:0002042	cell migration involved in sprouting angiogenesis	20	0.496751	2.163	0.00175435	0.0141436	0.00996445	1580	tags=60%	list=21%	signal=48%	26585/7049/9734/3791/8503/3162/10000/84830/2050/7057/6091/301
BP	GO:0031099	regeneration	75	0.297399	1.99254	0.00175917	0.0141599	0.00997599	1406	tags=36%	list=19%	signal=30%	5738/306/5792/7049/4837/688/23175/87178/595/2780/1996/3339/9860/51542/55013/337/6696/7448/5026/983/10631/3479/4192/133/6387/4147/890
CC	GO:0005769	early endosome	166	0.229212	1.82923	0.00176246	0.0141639	0.0099788	1580	tags=33%	list=21%	signal=26%	26119/84079/344/7018/1183/4771/6614/9214/79971/57007/7803/245972/3122/2060/9595/6272/3791/5861/3140/55016/150684/9910/30845/10269/8291/81615/920/335/55361/337/23062/933/4430/22943/9388/2150/208/57705/56937/30846/28988/23682/285195/27065/3833/4311/10981/10211/3135/7098/1184/27183/23392/301
MF	GO:0034987	immunoglobulin receptor binding	11	0.609191	2.08822	0.00179867	0.014432	0.0101677	955	tags=64%	list=13%	signal=56%	3502/3493/1380/3500/10863/3507/3512
BP	GO:0045807	positive regulation of endocytosis	50	0.343407	2.05847	0.0018385	0.0147082	0.0103622	1748	tags=46%	list=23%	signal=36%	26119/55423/154664/7018/1191/26228/6401/26585/274/335/2213/7448/197/2150/6347/28514/967/8976/10211/146722/1861/5533/3601
BP	GO:0045229	external encapsulating structure organization	142	0.249688	1.9266	0.00183888	0.0147082	0.0103622	1536	tags=36%	list=20%	signal=29%	1803/9806/4317/1310/183/26585/1545/7049/4811/8425/55624/169611/2192/8434/4921/25903/23127/1991/1511/4318/5345/7448/4320/7177/1311/1295/84830/170690/283208/6423/10631/1288/4060/144165/80781/64116/2022/2295/9510/11096/4314/11095/28984/4147/5156/64066/1287/8516/7132/10211/4316
BP	GO:0032098	regulation of appetite	10	0.604728	1.99598	0.00184266	0.0147152	0.0103672	759	tags=50%	list=10%	signal=45%	2200/51738/583/5443/8195
MF	GO:0042578	phosphoric ester hydrolase activity	125	0.254807	1.92629	0.00184834	0.0147373	0.0103828	1891	tags=39%	list=25%	signal=30%	249/8556/5792/23035/5723/9829/995/7803/3613/84513/3932/2140/5208/5784/23175/58497/54935/55229/8654/5337/5778/57103/9890/54/1033/250/54886/8867/79660/5783/85464/27115/10924/84814/1739/147699/10106/1850/9989/55313/5334/5533/5150/5796/80895/5532/403313/5786/51020
BP	GO:0042100	B cell proliferation	47	0.372771	2.1779	0.00185947	0.0147883	0.0104187	1254	tags=40%	list=17%	signal=34%	10125/51176/3575/4064/1380/51237/3574/115352/958/1880/959/2213/931/933/930/23495/115650/972/22806
BP	GO:0044703	multi-organism reproductive process	79	0.302249	2.0488	0.00186057	0.0147883	0.0104187	1672	tags=44%	list=22%	signal=35%	51738/54206/639/84172/824/91/2192/8434/3339/6513/4318/6696/3485/5069/116/3976/64478/5368/23641/8061/1268/3021/875/7076/133/2201/5672/56977/5676/5997/10699/23764/6833/552/10916
BP	GO:0002686	negative regulation of leukocyte migration	27	0.431383	2.08832	0.00186787	0.0148	0.0104269	1878	tags=56%	list=25%	signal=42%	11240/4681/1803/257144/26228/26585/3162/131450/84830/6347/6387/8976/5734/9466/23143
BP	GO:0038063	collagen-activated tyrosine kinase receptor signaling pathway	30	0.401213	2.02495	0.00186527	0.0148	0.0104269	2297	tags=63%	list=31%	signal=44%	2261/2321/3791/4921/238/1288/3815/2050/7010/5156/1287/5159/2041/4914/1969/2046/2048/284656/7075
BP	GO:0048259	regulation of receptor-mediated endocytosis	38	0.386117	2.12432	0.00187262	0.0148144	0.0104371	518	tags=26%	list=7%	signal=25%	26119/55061/344/7018/1191/6401/26585/9829/22848/84058
BP	GO:0010951	negative regulation of endopeptidase activity	16	0.524035	2.10271	0.00188454	0.0148624	0.0104709	1582	tags=62%	list=21%	signal=49%	9806/274/5176/8434/1378/5345/7448/710/7076/653145
BP	GO:0048048	embryonic eye morphogenesis	16	0.523913	2.10222	0.00188454	0.0148624	0.0104709	2107	tags=75%	list=28%	signal=54%	2200/65979/220/6664/51384/5076/2295/2201/7291/6935/10370/4237
BP	GO:0043549	regulation of kinase activity	125	0.253791	1.91861	0.00192417	0.0151514	0.0106745	1725	tags=37%	list=23%	signal=29%	2200/9928/100133941/10125/1236/183/2069/2321/63967/995/10178/28951/54206/84722/595/64793/245711/4921/57103/1116/1991/1647/920/2810/116/22974/3479/1033/1908/9088/285489/972/7057/9770/28984/5997/57214/5159/6091/7098/27040/64798/2041/9175/990/5347
BP	GO:0050000	chromosome localization	63	0.309021	1.98144	0.00198362	0.0155953	0.0109872	712	tags=24%	list=9%	signal=22%	9928/1731/91782/57405/9787/7272/4751/332/11130/10540/1063/11004/84722/245711/51112
BP	GO:0044042	glucan metabolic process	30	0.398602	2.01177	0.00200092	0.0157069	0.0110659	1098	tags=40%	list=15%	signal=34%	8972/80183/5443/55276/34/56270/83931/3953/2887/3479/208/79660
BP	GO:0008406	gonad development	93	0.277017	1.96295	0.00202048	0.0158359	0.0111567	2001	tags=45%	list=27%	signal=34%	259266/2625/2069/1545/3552/6382/7100/3791/157506/7022/8648/431707/8195/174/10468/2/3624/1081/6423/64478/6874/3815/3021/283/9468/6943/2254/9510/2674/5156/4254/59338/6716/1051/7098/2627/596/675/128637/5872/10370/4914
BP	GO:0034766	negative regulation of monoatomic ion transmembrane transport	27	0.43059	2.08448	0.0020283	0.0158543	0.0111697	821	tags=37%	list=11%	signal=33%	88/817/183/5581/274/150684/7531/845/55013/4318
BP	GO:0009612	response to mechanical stimulus	86	0.286148	1.99723	0.00202907	0.0158543	0.0111697	2078	tags=47%	list=28%	signal=34%	4353/55342/5723/943/958/9378/824/7100/10628/5339/10746/6513/4921/8195/1116/1647/2934/3485/10631/8061/3759/3815/7057/2022/4192/6387/1000/8989/7132/7098/63982/2534/5734/4615/22927/10370/7273/4914/1185/4878
BP	GO:0048012	hepatocyte growth factor receptor signaling pathway	27	0.429689	2.08012	0.00205122	0.0159952	0.011269	2297	tags=67%	list=31%	signal=46%	2261/2321/3791/4921/238/3815/2050/7010/5156/5159/2041/4914/1969/2046/2048/3925/284656/7075
MF	GO:0005215	transporter activity	402	0.184941	1.63274	0.00205341	0.0159952	0.011269	3387	tags=57%	list=45%	signal=33%	204962/777/225/79895/154664/6571/26207/1183/1687/126969/340273/255231/6574/2703/4707/540/245972/155066/3772/84879/55248/4948/57198/5192/131096/245973/5551/94097/6513/284613/127124/8514/29957/6518/57657/1261/23400/54896/50651/57685/374291/23120/9868/8645/9389/64078/93109/3779/7782/335/337/114884/84329/5244/2556/3263/5026/2167/5950/3773/28965/338328/6579/140679/348938/283537/3759/6565/206358/23413/…
BP	GO:0034113	heterotypic cell-cell adhesion	24	0.458899	2.1324	0.00206948	0.0160956	0.0113397	916	tags=42%	list=12%	signal=37%	914/4680/960/177/3932/1832/131450/8631/335/2266
CC	GO:0030134	COPII-coated ER to Golgi transport vesicle	37	0.390227	2.13588	0.00208216	0.0161694	0.0113917	1741	tags=51%	list=23%	signal=40%	7039/5265/3119/3115/3118/3117/3122/3120/374/3127/3113/972/146456/1075/3135/11018/23392/23259/10802
BP	GO:0001666	response to hypoxia	122	0.255417	1.91692	0.00208731	0.0161847	0.0114025	2081	tags=44%	list=28%	signal=33%	100133941/1803/177/54541/5581/7049/3552/842/824/2034/84069/3339/6513/57142/4921/57103/7015/50809/18/3779/3624/29923/10631/3976/5366/875/7057/7010/2022/7423/283/133/6387/28984/7291/114757/890/8994/1735/2030/847/2627/2033/596/7097/4891/6659/10370/360/1179/2475/57085/4524/5351
BP	GO:0120031	plasma membrane bounded cell projection assembly	190	0.221167	1.80606	0.00210725	0.0163143	0.0114938	2509	tags=46%	list=33%	signal=31%	1901/88/8556/23500/1236/3983/1183/26228/54443/583/10178/26751/688/9378/10806/4070/200162/54935/84173/5337/26052/1639/30845/84217/50649/8394/92749/85452/8195/92344/93594/23059/2934/170690/2150/144165/30846/3815/100506658/10810/83543/5365/57562/8632/3754/1012/5217/9576/8976/118491/56683/55764/123016/85302/90410/23613/23322/200894/84299/196527/57096/3320/123720/375790/49856/83715/2475/1969/9696/5592…
BP	GO:0055017	cardiac muscle tissue growth	30	0.396755	2.00244	0.00215919	0.0166909	0.0117591	1608	tags=50%	list=21%	signal=39%	1901/7049/221476/7161/5600/9241/9868/5950/983/3479/2254/7472/5997/4086/2627
BP	GO:1904707	positive regulation of vascular associated smooth muscle cell proliferation	17	0.498179	2.04301	0.00217434	0.0167824	0.0118236	1306	tags=53%	list=17%	signal=44%	26119/3725/5031/4921/7015/4318/3479/2254/9510
BP	GO:0003073	regulation of systemic arterial blood pressure	36	0.385748	2.08756	0.00218897	0.0168441	0.011867	2140	tags=61%	list=28%	signal=44%	183/143872/1907/6518/1511/5345/1359/170690/10631/1908/2150/3816/2022/4923/133/10699/7168/8509/552/4878/4879/1889
BP	GO:0031960	response to corticosteroid	61	0.320106	2.03097	0.00218697	0.0168441	0.011867	1648	tags=43%	list=22%	signal=34%	249/306/1545/1036/54541/5176/7538/842/6382/84676/64754/3485/2/3624/5069/8061/374/57630/133/590/445/1977/6340/4129/301/552
BP	GO:0031076	embryonic camera-type eye development	15	0.532513	2.06884	0.00219364	0.0168545	0.0118743	2704	tags=87%	list=36%	signal=56%	65979/157506/7289/220/6664/51384/5076/2295/7291/6935/10370/204851/10763
MF	GO:0043274	phospholipase binding	14	0.540508	2.02585	0.00221778	0.0169956	0.0119738	875	tags=50%	list=12%	signal=44%	9840/344/6401/3932/5590/29760/55024
BP	GO:2000353	positive regulation of endothelial cell apoptotic process	12	0.557547	1.99294	0.00221871	0.0169956	0.0119738	2815	tags=92%	list=37%	signal=57%	958/11126/959/7057/6347/28984/5584/3135/196527/2152/356
BP	GO:0014909	smooth muscle cell migration	34	0.386227	2.03988	0.00222775	0.0170391	0.0120044	1472	tags=47%	list=20%	signal=38%	80310/1545/6282/5031/4921/7015/2887/7448/10631/3479/4192/2254/9510/652/7168/5159
BP	GO:0071222	cellular response to lipopolysaccharide	88	0.282666	1.97407	0.00223797	0.0170691	0.0120255	2534	tags=52%	list=34%	signal=35%	4317/4064/26228/8564/79931/5581/3552/3576/129607/7538/958/7292/2635/824/7100/1604/923/1511/1669/4318/10563/6374/23641/5197/6347/820/4314/445/10417/4283/671/4795/51510/7097/4615/59307/7133/2048/5724/80149/5142/8915/2634/115362/2672/26191
BP	GO:0048666	neuron development	425	0.184559	1.63872	0.0022384	0.0170691	0.0120255	2013	tags=35%	list=27%	signal=27%	4681/9334/10642/84628/64919/84079/7357/2625/53335/9760/177/712/5792/57699/7025/5176/26227/51738/10178/6905/605/261734/9378/11178/639/84879/23499/57463/7068/9699/10507/84173/2051/10154/29116/2780/26052/1996/4343/6900/23114/9860/2736/57142/23334/1907/4921/473/4660/9890/343472/238/2016/431707/5590/51542/1855/57498/916/9241/1385/337/6696/22943/27319/6423/10631/116/3976/118427/1908/10381/374/144165/55…
BP	GO:0030278	regulation of ossification	48	0.339995	2.00197	0.00224903	0.0171244	0.0120645	3217	tags=71%	list=43%	signal=41%	1901/26585/9249/9636/91/2662/10269/4921/1311/22943/6664/197/651/4192/56975/2201/652/7291/79879/5734/490/596/196527/4146/79639/3491/1435/1893/5087/55811/130497/51374/91461/10736
MF	GO:0016887	ATP hydrolysis activity	159	0.233052	1.84962	0.00230068	0.0174652	0.0123046	1707	tags=34%	list=23%	signal=27%	9928/249/225/79895/154664/146909/9493/340273/27030/540/83858/4998/164045/11004/3310/8886/7203/57198/4343/127124/64222/11321/23020/23095/23400/6687/55729/23120/79710/11325/5244/122402/5888/10112/8653/55510/5190/201625/10924/3833/5217/55567/5892/6833/1665/55760/3835/8647/27183/1861/9319/27348/246269/990
BP	GO:0044092	negative regulation of molecular function	187	0.220483	1.79285	0.00229836	0.0174652	0.0123046	2972	tags=53%	list=40%	signal=33%	88/25927/9806/51176/6815/3240/3434/817/140/3725/183/1545/5792/274/5176/28951/7538/54206/7292/6272/3399/150684/8434/64793/845/307/1378/55917/9241/51339/4318/1647/5345/7448/710/2810/22943/6664/5365/1869/7076/8530/5997/64114/64798/653145/55832/8904/1475/2041/79918/4795/55502/341/5347/3001/51070/3315/197358/7014/23143/22927/5583/1676/10459/4878/55920/2048/3925/8431/93974/80149/26508/6536/255738/27329…
BP	GO:1901987	regulation of cell cycle phase transition	169	0.226894	1.81204	0.00231236	0.0175017	0.0123304	1949	tags=37%	list=26%	signal=28%	6241/699/9928/8556/6419/55159/57492/57405/9787/7272/332/8110/54443/11130/63967/2273/995/4998/605/1063/51514/8462/49860/348654/595/25949/4921/7015/51339/5888/3624/983/220134/9088/11065/55143/5218/1869/6347/9510/28984/1739/80174/57520/10106/637/27183/301/9700/6604/9319/990/5347/81610/596/675/2146/8881/701/9212/322/29980
MF	GO:0016772	transferase activity transferring phosphorus-containing groups	316	0.196302	1.69866	0.0023124	0.0175017	0.0123304	3004	tags=50%	list=40%	signal=32%	26289/699/2261/204/3702/2592/7272/817/4751/115572/2321/5581/7049/54855/22848/129607/10623/3932/3716/347736/84172/5208/23683/9451/51455/3791/84451/6675/8425/8503/87178/6041/5586/595/8491/91/2051/9578/10746/65220/83931/4921/8394/7015/56997/238/81788/23139/5590/5600/282974/10000/5613/55361/640/5616/27010/55872/983/25928/208/9088/165631/3815/5218/2050/1158/8395/7010/6347/54101/9468/56975/9770/5156/17…
BP	GO:0097006	regulation of plasma lipoprotein particle levels	37	0.388349	2.1256	0.0023635	0.0177824	0.0125281	1797	tags=49%	list=24%	signal=37%	26119/5320/4353/344/183/84879/3990/3162/29116/335/337/9388/338328/5046/6833/8435/341/3949
BP	GO:0044706	multi-multicellular organism process	81	0.290846	1.99127	0.00235932	0.0177824	0.0125281	1672	tags=43%	list=22%	signal=34%	51738/54206/639/84172/824/91/2192/8434/3339/6513/4318/6696/3485/5069/116/3976/64478/5368/23641/8061/1268/3021/875/7076/133/2201/5672/56977/5676/5997/10699/23764/6833/552/10916
MF	GO:0005085	guanyl-nucleotide exchange factor activity	97	0.270305	1.93337	0.00236105	0.0177824	0.0125281	898	tags=23%	list=12%	signal=20%	25780/55103/10125/84079/266747/57480/79961/89781/23263/9639/128272/23179/1104/57449/163259/5877/23550/50649/10542/57572/23075/160518
BP	GO:0007178	cell surface receptor protein serine/threonine kinase signaling pathway	122	0.253142	1.89984	0.0023554	0.0177824	0.0125281	1786	tags=39%	list=24%	signal=30%	2200/4774/4681/51176/116844/9404/7272/3725/26585/7049/6711/3791/8425/91/2662/63976/9241/53918/6774/10468/83891/1311/3624/22943/6423/6664/25928/56937/8287/7057/2022/2254/4093/10252/2201/652/65997/8516/4086/5046/6935/2627/10272/4487/84312/5796/2033
BP	GO:0006656	phosphatidylcholine biosynthetic process	14	0.538524	2.01841	0.00236985	0.0178037	0.0125431	1319	tags=57%	list=18%	signal=47%	204962/126969/824/84879/79888/335/9468/23682
CC	GO:0005635	nuclear envelope	159	0.232056	1.84172	0.0023755	0.0178198	0.0125544	4010	tags=72%	list=53%	signal=34%	169714/4008/91782/274/1063/51514/9378/6272/25909/23175/54884/595/245711/1996/1639/64222/10269/307/57540/57142/5590/144165/590/9536/84814/9883/57214/4086/10202/4599/23225/27183/8904/9551/2627/51510/1861/27348/2869/3601/4259/3429/403313/596/29843/128637/144404/22927/79789/64215/80772/199953/2475/4352/79639/200014/55706/5733/9635/64783/10885/148327/91181/4000/22926/9722/284680/26092/7175/5743/5321/5…
CC	GO:0098553	lumenal side of endoplasmic reticulum membrane	18	0.480338	2.01296	0.00238191	0.0178415	0.0125697	1752	tags=61%	list=23%	signal=47%	3119/3115/3118/3117/3122/3120/3127/3113/972/3135/121665
BP	GO:0010466	negative regulation of peptidase activity	20	0.487623	2.12325	0.00239879	0.0179414	0.0126401	1595	tags=60%	list=21%	signal=47%	9806/274/5176/8434/1378/5345/7448/710/7076/8530/653145/1475
BP	GO:0044344	cellular response to fibroblast growth factor stimulus	64	0.314481	2.02108	0.00241095	0.0180058	0.0126855	2297	tags=53%	list=31%	signal=37%	2261/960/2625/2321/3576/7538/9378/3791/4921/238/9241/10563/10631/64399/3815/2050/7057/7010/6347/2254/10252/56975/2252/5156/5159/10251/2041/2730/4914/1969/2046/2048/284656/7075
BP	GO:0060425	lung morphogenesis	20	0.487322	2.12195	0.00242266	0.0180401	0.0127097	1354	tags=60%	list=18%	signal=49%	157506/83931/9241/9620/3976/6664/64399/6943/10252/2252/7472/652
BP	GO:0043616	keratinocyte proliferation	32	0.397586	2.07347	0.00242018	0.0180401	0.0127097	1947	tags=56%	list=26%	signal=42%	64919/116844/2069/3664/7538/49860/10468/2810/374/51384/4192/2252/1012/6935/3849/5796/8573/2137
BP	GO:1901224	positive regulation of non-canonical NF-kappaB signal transduction	23	0.439099	2.01165	0.00243593	0.0181123	0.0127605	406	tags=30%	list=5%	signal=29%	939/10913/219790/8809/26585/177/9111
BP	GO:0051384	response to glucocorticoid	53	0.337344	2.05878	0.00247875	0.0184037	0.0129658	1648	tags=43%	list=22%	signal=34%	249/306/1545/1036/54541/5176/7538/842/6382/84676/64754/3485/2/5069/8061/374/133/590/445/1977/4129/301/552
BP	GO:0046330	positive regulation of JNK cascade	34	0.384442	2.03045	0.00249753	0.018516	0.013045	1323	tags=44%	list=18%	signal=37%	939/10913/1236/177/3552/6504/1647/5345/2213/22943/153769/2150/51384/57630/9770
BP	GO:1990868	response to chemokine	32	0.396181	2.06615	0.00250899	0.0185468	0.0130666	2298	tags=62%	list=31%	signal=44%	11240/1236/643/2840/57007/6362/6367/6368/6347/3579/6387/1237/6091/4283/1233/9034/23143/10936/80149/4352
BP	GO:1990869	cellular response to chemokine	32	0.396181	2.06615	0.00250899	0.0185468	0.0130666	2298	tags=62%	list=31%	signal=44%	11240/1236/643/2840/57007/6362/6367/6368/6347/3579/6387/1237/6091/4283/1233/9034/23143/10936/80149/4352
BP	GO:0050829	defense response to Gram-negative bacterium	33	0.400758	2.11362	0.00255647	0.0188527	0.0132821	1596	tags=52%	list=21%	signal=41%	149233/6403/3140/8764/11126/1991/1511/1669/920/3507/2150/133/820/5919/4316/671/4069
BP	GO:0055006	cardiac cell development	41	0.357931	2.01552	0.00255781	0.0188527	0.0132821	2069	tags=54%	list=28%	signal=39%	88/7049/80206/5339/221476/10269/4703/9868/3624/983/3479/144165/10252/6444/652/5156/5997/5159/10529/7273/4629/2475
BP	GO:0048568	embryonic organ development	163	0.230169	1.83192	0.00256773	0.0188978	0.0133139	1643	tags=36%	list=22%	signal=28%	2200/51176/2625/65979/3576/27042/3142/639/3791/157506/3399/57448/2034/8575/8648/2736/25949/1855/8195/9241/3212/23059/7289/2/220/5950/3976/6664/144165/51384/3815/91584/2022/133/79733/5076/6943/2295/2254/2201/7472/652/5156/4254/28514/5919/7291/8516/1739/2535/1051/3235/6935/5357/79879/2737/3216/55764
BP	GO:0006338	chromatin remodeling	467	0.178818	1.59861	0.00257138	0.0188978	0.0133139	1954	tags=33%	list=26%	signal=26%	90853/699/1058/249/11240/2261/8556/3702/6419/84864/2625/57492/7272/4751/8110/2321/5792/23035/57708/9829/22848/22955/995/7803/56950/605/164045/3932/3716/9869/2140/9451/9734/8886/3791/5784/54935/8491/7022/9578/84944/8648/22823/7799/29994/5778/4343/55677/83931/10269/4921/473/64754/23020/50809/63976/238/81788/23139/6687/55729/6018/282974/11325/10000/5613/7644/640/5616/122402/55872/9582/983/1033/7503/…
BP	GO:0051338	regulation of transferase activity	145	0.236488	1.83127	0.00259398	0.0190363	0.0134115	1725	tags=35%	list=23%	signal=28%	2200/9928/100133941/10125/5920/1236/183/2069/2321/63967/995/10178/28951/7538/54206/84722/595/64793/245711/4921/57103/1116/1991/1647/920/335/337/2810/116/22974/3479/1033/1908/9088/11065/285489/972/7057/9770/28984/5997/57214/5159/6091/7098/27040/64798/2041/9175/990/5347
BP	GO:0051604	protein maturation	187	0.219318	1.78337	0.0026347	0.0193072	0.0136023	3059	tags=55%	list=41%	signal=33%	7850/1803/3240/169714/1191/4820/6905/3310/842/824/7203/8425/26278/2192/151516/9462/10269/6900/58484/136242/55650/10130/8195/6687/64788/1675/10418/1511/2934/5345/715/2266/1311/350/81611/25825/8728/3816/150353/11328/972/7057/219743/64115/2999/590/10699/2289/4311/3250/3818/3337/5046/29100/2737/1861/27348/3004/121665/3001/2033/3315/91419/6659/26022/1514/3320/63929/64215/79258/1676/4878/4879/1889/3633…
BP	GO:0050927	positive regulation of positive chemotaxis	15	0.526455	2.0453	0.00269578	0.0197263	0.0138976	2474	tags=80%	list=33%	signal=54%	1901/177/3576/3791/2150/7423/6387/1012/3603/1233/9048/2152
BP	GO:0007272	ensheathment of neurons	58	0.322911	2.01528	0.00273346	0.0199158	0.0140311	2084	tags=48%	list=28%	signal=35%	9928/9334/225/1191/9639/9451/57463/23175/55624/5339/6900/23114/81615/208/3400/79152/10810/8530/1075/1739/7851/7097/26022/400746/6497/388585/2475/7133
BP	GO:0008366	axon ensheathment	58	0.322911	2.01528	0.00273346	0.0199158	0.0140311	2084	tags=48%	list=28%	signal=35%	9928/9334/225/1191/9639/9451/57463/23175/55624/5339/6900/23114/81615/208/3400/79152/10810/8530/1075/1739/7851/7097/26022/400746/6497/388585/2475/7133
BP	GO:0042552	myelination	58	0.322911	2.01528	0.00273346	0.0199158	0.0140311	2084	tags=48%	list=28%	signal=35%	9928/9334/225/1191/9639/9451/57463/23175/55624/5339/6900/23114/81615/208/3400/79152/10810/8530/1075/1739/7851/7097/26022/400746/6497/388585/2475/7133
BP	GO:2001236	regulation of extrinsic apoptotic signaling pathway	57	0.326482	2.02012	0.00274259	0.0199536	0.0140578	1866	tags=49%	list=25%	signal=37%	183/3574/51330/3552/2140/57448/3162/7015/959/2266/3958/3624/6423/3479/5366/57630/7057/652/637/64114/64798/467/55179/51741/2537/3655/596/2730
BP	GO:0070098	chemokine-mediated signaling pathway	29	0.410608	2.04636	0.00274925	0.0199734	0.0140717	1996	tags=59%	list=27%	signal=43%	11240/1236/643/2840/57007/6362/6367/6368/6347/3579/6387/1237/6091/4283/1233/9034/10936
BP	GO:0035790	platelet-derived growth factor receptor-alpha signaling pathway	28	0.409944	2.00023	0.00276487	0.0200582	0.0141314	2297	tags=64%	list=31%	signal=45%	2261/2321/3791/4921/238/3815/2050/7010/5156/5159/2041/90410/4914/1969/2046/2048/284656/7075
CC	GO:0044297	cell body	201	0.221097	1.8155	0.00278418	0.0201694	0.0142098	3200	tags=57%	list=43%	signal=34%	777/10642/57125/1269/306/4771/57565/5792/57699/5176/958/11346/9378/824/57463/7203/9627/1996/1639/3814/6900/57142/57657/1261/114327/5590/23400/1855/374291/916/23585/55361/2213/933/116/22974/5368/10381/3759/28988/5783/9026/283/4923/23682/2674/445/114757/8516/8507/4311/6252/51083/3337/6716/4129/2775/23542/2534/482/22866/30009/23426/7074/1233/3783/7097/3320/4914/338/339451/11315/4878/7133/65018/5909/…
MF	GO:0044389	ubiquitin-like protein ligase binding	94	0.26494	1.87732	0.00281405	0.0203567	0.0143417	2824	tags=56%	list=38%	signal=36%	1191/3725/9636/7188/28951/958/3716/118424/10628/9627/8764/91/7531/57142/23381/440738/1734/11065/152137/875/79899/8405/1051/4086/637/7098/6773/5094/596/23197/322/26043/3320/10613/6497/8863/9927/7133/54546/65018/7805/9682/8915/11146/6125/1629/26191/10067/23208/149628/4720/8548/27101
CC	GO:0005766	primary lysosome	56	0.315891	1.94937	0.00282507	0.0203783	0.014357	1681	tags=45%	list=22%	signal=35%	11240/4353/4680/154664/5284/79888/1991/1511/1669/1088/7276/12/5005/8876/353189/2040/1075/23593/967/5657/8904/671/4069/55313/51316
CC	GO:0042582	azurophil granule	56	0.315891	1.94937	0.00282507	0.0203783	0.014357	1681	tags=45%	list=22%	signal=35%	11240/4353/4680/154664/5284/79888/1991/1511/1669/1088/7276/12/5005/8876/353189/2040/1075/23593/967/5657/8904/671/4069/55313/51316
BP	GO:0042554	superoxide anion generation	18	0.473658	1.98496	0.00284327	0.0204804	0.0144289	1054	tags=44%	list=14%	signal=38%	57126/183/5581/4688/9644/84329/54/2150
BP	GO:0050680	negative regulation of epithelial cell proliferation	57	0.325558	2.0144	0.00286631	0.0206171	0.0145252	2192	tags=54%	list=29%	signal=39%	2625/2069/2321/7049/5176/51738/3664/1823/55333/2810/6423/350/7057/2022/6347/55840/28984/652/1739/6091/4163/6935/2627/5796/8573/197358/675/5909/864/126695/93974
BP	GO:0042632	cholesterol homeostasis	46	0.338867	1.98076	0.00287959	0.0206254	0.0145311	3213	tags=70%	list=43%	signal=40%	26119/100133941/344/29881/54206/9734/3990/29116/57540/335/337/2167/9388/338328/1066/8647/8435/7851/10802/3949/338/2170/255738/27329/257194/271/336/6646/2494/60526/64240/64241
BP	GO:0055092	sterol homeostasis	46	0.338867	1.98076	0.00287959	0.0206254	0.0145311	3213	tags=70%	list=43%	signal=40%	26119/100133941/344/29881/54206/9734/3990/29116/57540/335/337/2167/9388/338328/1066/8647/8435/7851/10802/3949/338/2170/255738/27329/257194/271/336/6646/2494/60526/64240/64241
BP	GO:0010038	response to metal ion	126	0.252263	1.91135	0.00287967	0.0206254	0.0145311	1592	tags=35%	list=21%	signal=28%	7018/817/57699/3552/5176/540/3613/9378/842/6382/9451/10628/3162/845/29957/4520/57103/7015/1261/4656/51542/23400/18/26149/1385/3779/7782/84329/2266/5026/2167/983/3815/4884/64116/7057/445/1396/4129/6833/6569/10768/847/8904
BP	GO:0048729	tissue morphogenesis	224	0.212274	1.77381	0.00292187	0.0208982	0.0147232	2584	tags=48%	list=34%	signal=33%	1901/51176/960/116844/2625/4771/183/26585/65979/10395/7049/79971/3791/9687/4070/157506/1832/27245/2736/1855/8195/92344/9241/1823/3212/26249/23059/7289/5613/9620/10468/220/3624/170690/22943/6423/3872/3976/6664/64399/64478/25928/374/144165/3400/51384/2022/4192/3579/54101/133/5076/6943/2295/11096/10252/2252/7472/652/94234/28514/7291/10512/8516/7168/1739/2535/6091/4086/10890/2737/55764/123016/1861/90…
BP	GO:0001649	osteoblast differentiation	89	0.277276	1.94373	0.0029415	0.0210089	0.0148012	1619	tags=40%	list=22%	signal=32%	249/51176/26585/3399/10507/2662/2736/4921/23020/5600/9241/6696/3485/6423/3479/1591/6664/374/651/3400/3021/151176/2254/4093/56975/2201/9770/5745/652/7291/8994/1051/4086/847/2737/8519
MF	GO:0030295	protein kinase activator activity	48	0.333965	1.96646	0.00296366	0.0211374	0.0148918	1781	tags=44%	list=24%	signal=34%	7039/100133941/26228/26585/2069/51738/595/2662/8575/245711/238/959/8115/374/79817/28984/652/80174/23542/9175/1163
BP	GO:0034763	negative regulation of transmembrane transport	43	0.366245	2.09697	0.00297379	0.0211741	0.0149176	2507	tags=60%	list=33%	signal=41%	88/817/183/5581/274/150684/7531/845/55917/55013/4318/2887/55022/208/7057/4923/5997/5533/5532/596/6248/2048/6536/255738/6814/2946
BP	GO:0031348	negative regulation of defense response	114	0.252118	1.87395	0.00297741	0.0211741	0.0149176	2741	tags=54%	list=37%	signal=35%	55061/10225/2625/2840/9636/11326/51738/7538/9111/81607/100507436/1378/388581/131450/1991/6774/335/2213/2/710/2810/55872/54/3479/100313774/384/64116/7010/4192/8530/3821/58189/8993/7132/3135/6773/5624/2534/5734/11274/3949/5094/197358/9212/2137/7133/58985/84243/27293/51441/284467/80263/405/79626/5692/103/149095/55870/23208/3428/325/56833
BP	GO:0051129	negative regulation of cellular component organization	276	0.202992	1.74007	0.00298133	0.0211741	0.0149176	3788	tags=64%	list=50%	signal=33%	699/9928/1901/1803/6419/84079/9882/344/1191/57405/26228/7272/163782/332/53335/11130/10395/26586/7025/7049/6711/1063/9378/4070/348654/84058/26278/29116/26052/3339/8291/9860/57142/5590/8195/6018/51339/2934/335/337/2213/6696/23075/9023/3958/84830/22943/220134/22974/3479/3976/81624/89927/7082/55143/5783/3021/9026/7429/5365/7057/85464/652/9037/3337/5217/10251/8976/7132/5657/25827/2534/9700/5734/146722…
BP	GO:0035195	miRNA-mediated post-transcriptional gene silencing	50	-0.223777	-2.02384	0.00299472	0.0212395	0.0149637	3184	tags=72%	list=42%	signal=42%	142940/100302150/23019/283131/8087/407009/55384/407013/100423003/693180/693137/100126334/407033/400931/442915/5901/768213/406918/100313843/100302281/693185/693135/693160/23112/693162/406959/494334/406977/100188847/442904/100126340/406960/57510/406986/406991/3569
BP	GO:0036293	response to decreased oxygen levels	125	0.244823	1.85081	0.00302911	0.0214534	0.0151144	2081	tags=43%	list=28%	signal=32%	100133941/1803/177/54541/5581/7049/3552/842/824/2034/84069/3339/6513/57142/4921/57103/7015/50809/18/3779/3624/29923/10631/3976/5366/875/7057/7010/2022/7423/283/133/6387/28984/7291/114757/890/8994/1735/2030/847/2627/2033/596/7097/4891/6659/10370/360/1179/2475/57085/4524/5351
BP	GO:0043500	muscle adaptation	37	0.380627	2.08334	0.00305736	0.0216233	0.0152341	3108	tags=73%	list=41%	signal=43%	817/183/6905/84676/8654/3162/221476/4656/9868/2934/3479/2628/5997/7132/2627/2146/4878/7133/9682/4000/844/55811/4653/779/493/142/9475
MF	GO:0004222	metalloendopeptidase activity	45	0.355468	2.05991	0.00306513	0.021648	0.0152515	2767	tags=67%	list=37%	signal=42%	129293/4317/60676/10269/388630/6687/4318/4320/10863/5069/170690/8728/9510/11096/4314/11095/64066/4311/4316/91419/1179/79258/1889/4898/115209/9635/22802/11085/8751/9507
MF	GO:0019894	kinesin binding	19	0.477528	2.04257	0.00307417	0.0216817	0.0152752	2362	tags=74%	list=31%	signal=51%	146909/9639/22920/23095/23542/1861/27348/81610/9043/8934/22883/23207/9696/7804
BP	GO:0048762	mesenchymal cell differentiation	93	0.268841	1.90502	0.00307973	0.0216907	0.0152816	3488	tags=68%	list=46%	signal=37%	51176/116844/2625/183/26585/65979/7049/84172/157506/10507/57142/9241/6423/3479/1908/51384/80237/2022/4192/5076/6943/2295/10252/7472/28984/652/4254/1000/7291/9037/10512/57181/7074/4487/81610/596/2146/10370/1947/2475/10459/10630/55223/26508/10500/6275/8751/1942/64218/59349/4139/9475/130497/10736/80204/200734/200558/84695/10505/54910/57669/23332/7422
BP	GO:0051336	regulation of hydrolase activity	136	0.242873	1.86743	0.00308626	0.0217066	0.0152928	2769	tags=54%	list=37%	signal=35%	2261/9806/10125/344/177/143872/274/5176/9639/6272/6004/10507/8434/1378/8394/23400/5996/6774/335/337/5345/7448/4594/710/10563/116/350/338328/2150/5365/7076/8530/64115/5997/5657/653145/1475/2041/341/9712/202243/7074/3001/3655/7014/2146/128637/23143/253959/4914/375790/27237/1676/1969/55920/5909/55616/3925/93974/4898/85440/27329/84144/7813/8412/10451/51107/1893/1944/1942/325/23385/336
BP	GO:0033081	regulation of T cell differentiation in thymus	14	0.530148	1.98702	0.00313298	0.0219742	0.0154813	1677	tags=64%	list=22%	signal=50%	10125/3575/9840/9760/2736/8876/652/6935/814
BP	GO:0050777	negative regulation of immune response	100	0.261851	1.88578	0.00313165	0.0219742	0.0154813	2991	tags=57%	list=40%	signal=35%	55061/9173/10225/3575/1380/3142/2840/9636/11326/6504/7292/9111/81607/8764/100507436/1604/1378/11126/2213/2/710/3958/2810/100313774/384/3821/5648/8993/3135/6773/301/2534/55255/30009/5532/11274/197358/9466/9212/84243/51441/80149/5692/114771/103/51043/149095/3428/56833/127943/149041/5788/722/1379/4179/11221/142
BP	GO:0010458	exit from mitosis	16	0.505793	2.02952	0.00314404	0.0220212	0.0155144	213	tags=31%	list=3%	signal=30%	4774/8556/91782/332/54443
BP	GO:0002831	regulation of response to biotic stimulus	222	0.211593	1.76409	0.00314836	0.0220212	0.0155144	958	tags=20%	list=13%	signal=18%	55061/149233/163702/4068/10225/10125/80342/56253/4064/79931/2069/1687/92747/115352/5581/91543/57402/9636/11326/5443/10623/8807/9111/81607/7100/3075/3140/117157/7531/100507436/1604/10269/58484/57142/1378/57103/11126/9868/54941/81793/2213/3263/2/710/2810
BP	GO:0071677	positive regulation of mononuclear cell migration	30	0.386325	1.9498	0.00315822	0.0220597	0.0155415	1367	tags=43%	list=18%	signal=36%	80310/1236/177/57402/6504/8764/57142/10563/3958/7057/4192/6387/5919
BP	GO:0098660	inorganic ion transmembrane transport	313	0.190888	1.6515	0.00316334	0.0220651	0.0155453	2552	tags=45%	list=34%	signal=31%	88/777/6571/1236/1183/817/183/5581/255231/6574/274/2273/4707/540/245972/155066/3932/3772/57463/55248/4948/131096/245973/150684/5031/7531/845/127124/8514/57657/1261/57685/374291/6687/81615/8645/55013/6947/64078/3779/7782/931/930/84329/2556/5026/51297/117/3773/1908/140679/348938/283537/3759/6565/206358/23413/9963/56479/64116/4923/7225/30061/285195/116843/3754/8989/1739/7402/51083/57419/6340/57214/9…
BP	GO:0002367	cytokine production involved in immune response	56	0.31418	1.93881	0.00319624	0.022264	0.0156854	1871	tags=45%	list=25%	signal=34%	10225/2625/8809/3554/91543/6504/7292/8764/1604/57142/11126/5590/335/54/2150/3815/972/5553/7291/10417/3135/7098/30009/54210/4615
BP	GO:1902905	positive regulation of supramolecular fiber organization	70	0.293222	1.92895	0.0032073	0.0223103	0.0157181	1463	tags=37%	list=19%	signal=30%	88/1236/1191/4771/5581/274/10178/11346/9639/84722/1639/122060/2934/335/5345/23075/220134/2150/100506658/10810/7429/28984/9037/7168/1739/5217
BP	GO:0002228	natural killer cell mediated immunity	36	0.375467	2.03192	0.0032176	0.0223513	0.015747	716	tags=28%	list=10%	signal=25%	914/4068/10225/10125/56253/8807/81607/117157/100507436/11126
BP	GO:0045730	respiratory burst	17	0.488269	2.00237	0.00323442	0.0224374	0.0158076	579	tags=35%	list=8%	signal=33%	1043/4353/100133941/3493/4688/1604
BP	GO:0002385	mucosal immune response	13	0.547449	2.02432	0.00328701	0.0227711	0.0160427	1844	tags=69%	list=25%	signal=52%	163702/92747/5284/11126/1669/337/820/8346/8347
MF	GO:0005017	platelet-derived growth factor receptor activity	26	0.422396	2.02687	0.00331898	0.0229299	0.0161546	2297	tags=65%	list=31%	signal=46%	2261/2321/3791/4921/238/3815/2050/7010/5156/5159/2041/4914/1969/2046/2048/284656/7075
MF	GO:0005019	platelet-derived growth factor beta-receptor activity	26	0.422396	2.02687	0.00331898	0.0229299	0.0161546	2297	tags=65%	list=31%	signal=46%	2261/2321/3791/4921/238/3815/2050/7010/5156/5159/2041/4914/1969/2046/2048/284656/7075
BP	GO:2001237	negative regulation of extrinsic apoptotic signaling pathway	35	0.379573	2.0302	0.00334469	0.0230761	0.0162576	1866	tags=54%	list=25%	signal=41%	3574/3552/2140/57448/3162/7015/2266/3958/6423/3479/57630/7057/652/64114/55179/2537/3655/596/2730
MF	GO:1903231	mRNA base-pairing translational repressor activity	10	-0.52853	-1.99297	0.00337075	0.0232243	0.016362	2675	tags=90%	list=36%	signal=58%	407009/693137/100126334/407033/693135/406959/442904/406986/406991
MF	GO:0001618	virus receptor activity	20	0.477273	2.07819	0.00338211	0.0232307	0.0163666	978	tags=45%	list=13%	signal=39%	1803/1380/6504/81607/8764/1604/1378/920/983
BP	GO:0001843	neural tube closure	30	0.383862	1.93737	0.00338543	0.0232307	0.0163666	2461	tags=67%	list=33%	signal=45%	65979/10395/9241/23059/7289/9620/6423/144165/133/5076/652/7291/55764/10370/6497/4524/57822/6491/8915/11146
BP	GO:0060606	tube closure	30	0.383862	1.93737	0.00338543	0.0232307	0.0163666	2461	tags=67%	list=33%	signal=45%	65979/10395/9241/23059/7289/9620/6423/144165/133/5076/652/7291/55764/10370/6497/4524/57822/6491/8915/11146
BP	GO:0048638	regulation of developmental growth	120	0.252574	1.88809	0.00339297	0.023251	0.0163809	1383	tags=32%	list=18%	signal=26%	2261/53335/3574/57699/7049/3142/51738/583/84879/23499/9699/10507/221476/84944/7161/10269/57142/343472/8195/5600/9241/9868/1385/6774/6696/5026/5950/983/1081/3479/91584/7429/2254/7472/6387/28514/5997/9037
BP	GO:0022603	regulation of anatomical structure morphogenesis	335	0.189418	1.64803	0.00342233	0.0234205	0.0165003	1615	tags=30%	list=22%	signal=25%	84628/84079/960/116844/2625/306/4771/183/53335/26585/1545/2321/57699/3552/5176/3576/51738/958/3716/11178/84879/23499/57463/10352/3791/9699/4070/10507/8434/3162/10154/26052/3339/4343/10269/6900/57142/7015/6464/11126/576/1855/80821/9241/1116/6774/1647/55022/10000/55333/6696/10563/22943/6423/3976/350/7082/3815/1990/23316/10810/7429/5365/7057/7010/2022/6347/7423/4192/3579/133/5076/820/9510/10252/2252…
BP	GO:0060043	regulation of cardiac muscle cell proliferation	14	0.526033	1.97159	0.00343863	0.0235004	0.0165565	1946	tags=71%	list=26%	signal=53%	7049/7161/5600/9241/5950/983/2254/7472/2627/10370
BP	GO:0031100	animal organ regeneration	26	0.421525	2.02269	0.00345631	0.0235299	0.0165773	1496	tags=50%	list=20%	signal=40%	306/7049/4837/23175/87178/595/3339/7448/983/133/6387/890/1051
BP	GO:0090066	regulation of anatomical structure size	191	0.214947	1.75741	0.0034499	0.0235299	0.0165773	1400	tags=28%	list=19%	signal=24%	128239/88/3680/3575/23500/1236/163782/183/53335/143872/5581/274/6711/583/10178/23341/23499/10507/6900/4703/57142/1907/10542/3352/50809/343472/23400/8195/1385/3779/10000/2934/3043/5345/6696/23075/3827/2266/1311/1908/2150/91584/9026/7429/875/133/5029/5076/85464/6387/5997/9037/79987/1739
MF	GO:0008233	peptidase activity	200	0.211998	1.73899	0.00345686	0.0235299	0.0165773	3021	tags=56%	list=40%	signal=34%	1803/129293/1519/3240/4317/716/60676/7174/842/824/151516/10269/388630/11330/6687/1675/1991/1511/4318/715/4320/10863/1359/64499/7177/5069/170690/25825/8728/3816/1990/360200/8287/643834/219743/1075/9510/5648/11096/2999/4314/11095/64066/10699/4311/3250/3818/5046/5657/3426/4316/5624/8904/9700/159195/54504/3004/64854/121665/84749/3001/11274/29843/27351/91419/5687/1514/63929/113791/1179/79258/11315/107…
BP	GO:0046889	positive regulation of lipid biosynthetic process	28	0.404625	1.97428	0.00346189	0.0235325	0.0165792	2207	tags=61%	list=29%	signal=43%	225/344/3552/824/84879/157506/1385/337/1081/972/133/23682/221395/552/3949/2475/2170
BP	GO:0043473	pigmentation	47	0.359088	2.09796	0.00352615	0.0238735	0.0168194	1636	tags=45%	list=22%	signal=35%	10913/84079/583/5443/10540/89781/4948/5861/2780/1639/23334/8195/1908/25825/3815/23682/4254/10981/967/2737/162
BP	GO:0048659	smooth muscle cell proliferation	56	0.311627	1.92306	0.00352618	0.0238735	0.0168194	1472	tags=38%	list=20%	signal=30%	26119/80310/1901/3725/2069/3162/5031/4921/7015/1991/4318/5345/3479/7057/283/2254/9510/652/7168/1012/5159
BP	GO:0048660	regulation of smooth muscle cell proliferation	56	0.311627	1.92306	0.00352618	0.0238735	0.0168194	1472	tags=38%	list=20%	signal=30%	26119/80310/1901/3725/2069/3162/5031/4921/7015/1991/4318/5345/3479/7057/283/2254/9510/652/7168/1012/5159
BP	GO:0035743	CD4-positive alpha-beta T cell cytokine production	13	0.54504	2.01541	0.00353792	0.0239211	0.0168529	719	tags=46%	list=10%	signal=42%	2625/8809/3554/91543/6504/5590
BP	GO:0031547	brain-derived neurotrophic factor receptor signaling pathway	26	0.421206	2.02116	0.00354787	0.0239564	0.0168778	2297	tags=65%	list=31%	signal=46%	2261/2321/3791/4921/238/3815/2050/7010/5156/5159/2041/4914/1969/2046/2048/284656/7075
BP	GO:0014020	primary neural tube formation	31	0.392366	2.01119	0.00360936	0.0243223	0.0171356	2461	tags=68%	list=33%	signal=46%	65979/10395/9241/23059/7289/9620/6423/144165/133/5076/652/7291/55764/10370/6497/4524/7798/57822/6491/8915/11146
BP	GO:0030282	bone mineralization	50	0.329239	1.97354	0.00361166	0.0243223	0.0171356	1449	tags=38%	list=19%	signal=31%	1901/9923/249/2261/26585/9636/9451/10269/4921/1311/3479/197/144165/56975/2201/5745/652/7291/57419
BP	GO:2000378	negative regulation of reactive oxygen species metabolic process	15	0.519511	2.01832	0.00365314	0.024569	0.0173094	2135	tags=73%	list=28%	signal=53%	225/3240/6571/57103/54/5076/4314/2534/596/11315/65018
CC	GO:0045121	membrane raft	125	0.242379	1.83234	0.00367684	0.024663	0.0173757	2912	tags=55%	list=39%	signal=34%	57126/1901/100133941/1803/925/6401/55600/10395/3932/962/824/3791/1604/6513/1378/8631/284119/920/55361/931/930/5244/84830/117/30846/4973/1268/51338/7010/4923/2040/55824/8436/28514/1000/1739/4311/1012/7132/10211/5657/27040/7851/2534/23180/7097/1947/10613/11315/7133/10630/79180/23673/5538/7804/199920/8915/476/55243/909/480/51744/9722/356/7143/7827/5743/5788/493
CC	GO:0098857	membrane microdomain	125	0.242379	1.83234	0.00367684	0.024663	0.0173757	2912	tags=55%	list=39%	signal=34%	57126/1901/100133941/1803/925/6401/55600/10395/3932/962/824/3791/1604/6513/1378/8631/284119/920/55361/931/930/5244/84830/117/30846/4973/1268/51338/7010/4923/2040/55824/8436/28514/1000/1739/4311/1012/7132/10211/5657/27040/7851/2534/23180/7097/1947/10613/11315/7133/10630/79180/23673/5538/7804/199920/8915/476/55243/909/480/51744/9722/356/7143/7827/5743/5788/493
BP	GO:0098771	inorganic ion homeostasis	174	0.216105	1.73436	0.00369226	0.0247338	0.0174255	3037	tags=54%	list=40%	signal=33%	249/7018/1236/817/183/5581/3552/57402/540/958/3932/3791/51027/2034/150684/391059/3162/5031/7531/845/11330/1907/284612/51542/57217/23400/26249/55013/1991/930/3263/771/23627/1908/3759/1268/6368/64116/4923/151176/7225/5745/30061/6444/6387/10699/8989/57419/6340/57214/6569/4283/482/5334/4502/10467/57181/55858/490/596/57158/4891/48/6339/9651/4879/6007/6006/7780/2827/51102/3061/148867/23155/2946/476/148…
BP	GO:0071375	cellular response to peptide hormone stimulus	130	0.248118	1.88837	0.00370351	0.0247764	0.0174555	2179	tags=42%	list=29%	signal=31%	2200/88/2261/23484/9882/57492/183/51237/1545/2321/51738/3716/9734/3791/23175/8503/8648/4921/6464/238/5590/388581/6774/2887/55022/3624/197/208/3815/2050/7010/151176/1442/445/5156/5919/890/6340/5584/5159/10768/10890/2041/990/490/5872/5786/4914/6339/2475/57085/1969/2046/2048/23038
MF	GO:0004714	transmembrane receptor protein tyrosine kinase activity	30	0.379372	1.91471	0.00374896	0.0250474	0.0176464	2297	tags=60%	list=31%	signal=42%	2261/2321/3791/2051/4921/238/3815/2050/7010/5156/5159/2041/4914/1969/2046/2048/284656/7075
BP	GO:0000302	response to reactive oxygen species	75	0.282867	1.89518	0.00377542	0.025191	0.0177476	1840	tags=41%	list=25%	signal=32%	80310/4353/3240/1545/3552/8807/6382/824/5192/10628/3162/54936/4921/3043/337/983/117/3039/8061/374/4314/5156/114757/8989/7168/59338/847/2534/5796/596/2146
MF	GO:0019887	protein kinase regulator activity	84	0.285004	1.96932	0.00379084	0.0252606	0.0177967	2025	tags=44%	list=27%	signal=33%	7039/100133941/645121/26228/26585/2069/51738/28951/8900/54920/595/2662/8575/245711/238/57498/959/8115/2810/374/79817/5575/28984/652/890/80174/64798/23542/9175/11113/1163/3315/6009/7273/5583/81669/55210
BP	GO:0032623	interleukin-2 production	29	0.40298	2.00835	0.00383984	0.0254867	0.0179559	850	tags=34%	list=11%	signal=31%	940/2625/9308/3552/6711/11326/7538/1378/916/920
BP	GO:0032663	regulation of interleukin-2 production	29	0.40298	2.00835	0.00383984	0.0254867	0.0179559	850	tags=34%	list=11%	signal=31%	940/2625/9308/3552/6711/11326/7538/1378/916/920
BP	GO:0033044	regulation of chromosome organization	94	0.259957	1.84202	0.00383732	0.0254867	0.0179559	2073	tags=43%	list=28%	signal=31%	699/6419/57492/57405/9787/7272/4751/332/8110/11130/23397/605/1063/7203/348654/23381/51112/983/220134/11065/55143/3021/125476/57520/9700/6604/9319/990/5347/54892/7014/64682/56160/116028/8881/701/9212/3320/5394/10459
BP	GO:0071825	protein-lipid complex organization	27	0.408568	1.97787	0.00393844	0.026107	0.0183929	997	tags=37%	list=13%	signal=32%	5320/4353/344/183/274/84879/3990/335/337/9388
BP	GO:0071774	response to fibroblast growth factor	65	0.30812	1.99403	0.00395068	0.0261539	0.018426	1498	tags=40%	list=20%	signal=32%	2261/960/2625/2321/3576/7538/9378/3791/4921/238/9241/10563/10631/64399/3815/2050/7057/7010/6347/2254/10252/56975/2252/5156/5159/10251
BP	GO:0071496	cellular response to external stimulus	27	0.408135	1.97578	0.0039845	0.0263434	0.0185595	1892	tags=56%	list=25%	signal=42%	978/943/958/7100/5339/10746/6513/1647/3759/2022/7132/7098/5734/4615/22927
BP	GO:0007548	sex differentiation	107	0.253482	1.84719	0.00400993	0.0264382	0.0186263	1537	tags=36%	list=20%	signal=29%	259266/2625/2069/1545/3552/6382/7100/3791/157506/7022/8648/431707/8195/174/10468/2/5950/3624/1081/6423/117/64478/6874/3815/3021/283/9468/6943/2295/2254/9510/2674/5156/4254/1602/59338/6716/1051/7098
MF	GO:0140678	molecular function inhibitor activity	194	0.215831	1.76485	0.00401448	0.0264382	0.0186263	2212	tags=42%	list=29%	signal=31%	9806/51176/6815/344/5265/306/817/332/183/274/5176/462/3699/28951/54920/10628/3399/57448/150684/8434/221476/7531/307/4660/55013/3698/5345/3827/3485/10468/2/12/710/3958/2810/22943/153769/7503/81611/197/3700/3400/3730/221692/27018/7057/7076/5575/8530/2040/58189/5997/57650/3337/6050/8405/84707/64798/1472/301/1475/4795/11113/9232/341/96459/4061/490/3315/596/23197/5583/55210/6497/11315/1676/6248/8431/2…
BP	GO:0044057	regulation of system process	195	0.215357	1.76462	0.00401044	0.0264382	0.0186263	1521	tags=31%	list=20%	signal=25%	3680/817/140/183/177/143872/274/51738/5443/9378/9451/7068/9699/84676/23175/1832/2034/8654/221476/7531/30845/845/3814/10269/1573/1907/4660/4656/5590/1855/18/9868/335/337/6696/2266/3624/3479/1908/2150/3759/3815/23316/9026/10810/4923/133/60675/5575/8530/1075/5997/10699/79987/7168/1739/51083/7132/6833/2775
BP	GO:0030879	mammary gland development	57	0.318151	1.96857	0.00402107	0.0264473	0.0186327	1828	tags=44%	list=24%	signal=33%	128239/7039/51176/2625/1036/3664/540/595/8648/2736/57142/1385/64478/25928/208/374/7472/652/1051/6091/3235/2030/2737/4487/675
BP	GO:0050994	regulation of lipid catabolic process	27	0.407896	1.97462	0.00403057	0.0264593	0.0186411	1797	tags=56%	list=24%	signal=42%	225/344/5581/84879/238/337/13/208/1268/219743/5919/7291/8647/341/3949
BP	GO:0051216	cartilage development	83	0.276292	1.90373	0.00403333	0.0264593	0.0186411	3217	tags=63%	list=43%	signal=36%	4774/2261/960/129642/2625/26585/51738/583/54206/9451/10269/8195/7227/9241/1116/1311/6423/651/875/7076/4192/5307/2254/5745/652/4086/6935/2737/64764/80856/4487/7045/388585/864/4146/353500/656/3491/1301/7482/1893/57326/7059/4209/5396/26254/7483/130497/4148/2355/91461/10736
BP	GO:0048545	response to steroid hormone	121	0.247774	1.85354	0.00405387	0.0265597	0.0187119	1835	tags=38%	list=24%	signal=29%	249/11240/306/3725/1545/1036/54541/5176/5732/7538/54206/842/6382/84676/10628/8648/64754/51542/164091/6696/3485/2/3624/5069/84830/8061/374/56937/8284/57630/7057/133/6943/590/445/1977/6340/6716/4129/301/552/23081/2033/10474/596/7097
BP	GO:0034381	plasma lipoprotein particle clearance	22	0.442866	1.98984	0.00409137	0.0267707	0.0188606	2935	tags=77%	list=39%	signal=47%	26119/344/3990/3162/29116/335/9388/338328/6833/8435/341/3949/338/255738/336/6646/29949
BP	GO:0043123	positive regulation of canonical NF-kappaB signal transduction	61	0.307402	1.95037	0.0041082	0.0268462	0.0189138	2991	tags=62%	list=40%	signal=38%	10913/1236/4919/57708/5581/6574/3552/79971/7188/958/3162/57449/10542/959/6774/920/2150/51523/972/7132/10211/1665/7098/4615/29110/5966/142678/65018/55223/541468/1491/8915/1893/6275/356/55765/9641/142
BP	GO:0001101	response to acid chemical	47	0.355761	2.07852	0.00411736	0.0268715	0.0189315	2267	tags=57%	list=30%	signal=40%	80310/53335/1036/824/57463/5339/2662/10542/9868/1288/80781/4314/445/5156/1051/6935/2534/552/2033/2730/4615/4914/2475/4524/83667/1307/64121
CC	GO:0000779	condensed chromosome centromeric region	69	0.286662	1.88183	0.00417592	0.0272186	0.0191761	712	tags=22%	list=9%	signal=20%	699/1058/91782/57405/7272/4751/332/11130/10540/1063/11004/25909/253635/1639/51112
BP	GO:0051310	metaphase chromosome alignment	56	0.307814	1.89953	0.00418604	0.0272495	0.0191979	466	tags=21%	list=6%	signal=20%	9928/1731/91782/57405/7272/4751/332/11130/10540/1063/11004/84722
BP	GO:0010811	positive regulation of cell-substrate adhesion	45	0.349507	2.02537	0.00420661	0.0273484	0.0192675	1454	tags=42%	list=19%	signal=34%	9806/4680/1236/5581/4811/3791/2192/5590/916/8631/10562/335/7448/2266/1295/7010/4192/7402/1012
BP	GO:1901381	positive regulation of potassium ion transmembrane transport	19	0.463083	1.98078	0.00428446	0.0276888	0.0195074	2797	tags=79%	list=37%	signal=50%	88/57463/3779/1908/3759/51083/482/3783/29843/196527/4878/126755/9722/440699/481
BP	GO:0042269	regulation of natural killer cell mediated cytotoxicity	19	0.462046	1.97635	0.00428446	0.0276888	0.0195074	716	tags=37%	list=10%	signal=33%	4068/10125/56253/8807/81607/100507436/11126
BP	GO:0014009	glial cell proliferation	19	0.461395	1.97357	0.00428446	0.0276888	0.0195074	2596	tags=74%	list=35%	signal=48%	4774/1191/4771/3953/6664/374/2119/5584/6833/6659/5583/6497/1435/29956
MF	GO:0019199	transmembrane receptor protein kinase activity	40	0.349059	1.94759	0.00428627	0.0276888	0.0195074	2709	tags=62%	list=36%	signal=40%	2261/2321/7049/3791/8425/91/2051/4921/238/25928/3815/2050/7010/5156/5159/2041/4914/1969/2046/2048/284656/7075/148738/1944/3645
BP	GO:0042542	response to hydrogen peroxide	40	0.348957	1.94702	0.00428627	0.0276888	0.0195074	1840	tags=48%	list=25%	signal=36%	80310/3240/1545/8807/6382/824/10628/3162/3043/983/3039/8061/374/8989/59338/847/2534/596/2146
BP	GO:0002718	regulation of cytokine production involved in immune response	55	0.321488	1.97491	0.00429283	0.0276958	0.0195123	1537	tags=40%	list=20%	signal=32%	10225/2625/8809/3554/91543/6504/7292/8764/1604/57142/11126/5590/335/54/2150/3815/972/5553/7291/10417/3135/7098
MF	GO:0017147	Wnt-protein binding	11	0.574006	1.96761	0.00439532	0.0283211	0.0199528	1445	tags=64%	list=19%	signal=51%	129293/4919/79971/8434/388630/6423/2535
BP	GO:0046470	phosphatidylcholine metabolic process	37	0.371563	2.03373	0.00440171	0.0283212	0.0199529	2207	tags=54%	list=29%	signal=38%	204962/5320/129642/5920/126969/824/84879/3990/79888/335/337/9468/23682/341/3949/30814/26279/64600/391013/2170
BP	GO:0090322	regulation of superoxide metabolic process	14	0.516593	1.93621	0.00440652	0.0283212	0.0199529	1054	tags=50%	list=14%	signal=43%	57126/183/5581/6464/84329/54/2150
BP	GO:0045931	positive regulation of mitotic cell cycle	48	0.324108	1.90842	0.00443579	0.0284733	0.0200601	2341	tags=54%	list=31%	signal=38%	6241/9787/332/995/51514/5586/595/4921/7015/983/220134/11065/9510/28984/80174/1977/301/9700/6604/990/675/8881/55920/991/6886/6491
BP	GO:0002720	positive regulation of cytokine production involved in immune response	41	0.346863	1.9532	0.00446111	0.0285635	0.0201236	1537	tags=41%	list=20%	signal=33%	2625/8809/3554/91543/6504/7292/8764/1604/57142/11126/5590/2150/3815/972/10417/3135/7098
BP	GO:0043200	response to amino acid	41	0.346497	1.95114	0.00446111	0.0285635	0.0201236	2267	tags=56%	list=30%	signal=39%	80310/53335/1036/824/57463/2662/10542/9868/1288/4314/445/5156/1051/6935/2534/2033/2730/4615/2475/4524/83667/1307/64121
BP	GO:0051092	positive regulation of NF-kappaB transcription factor activity	47	0.353291	2.06408	0.0045409	0.0289964	0.0204286	811	tags=30%	list=11%	signal=27%	1191/219790/8809/183/177/4919/7188/8807/49860/58484/10542/238/5590/959
BP	GO:0044409	symbiont entry into host	38	0.367204	2.02026	0.00453883	0.0289964	0.0204286	978	tags=34%	list=13%	signal=30%	1803/1380/6614/3576/6504/2060/81607/8764/1604/1378/920/9023/983
CC	GO:0044853	plasma membrane raft	41	0.345505	1.94555	0.00454608	0.0289964	0.0204286	1525	tags=44%	list=20%	signal=35%	57126/925/6401/10395/6513/1378/8631/284119/931/84830/117/30846/51338/8436/1000/1012/10211/5657
BP	GO:0051345	positive regulation of hydrolase activity	76	0.288372	1.93185	0.00455159	0.0289964	0.0204286	2756	tags=58%	list=37%	signal=37%	2261/10125/344/177/143872/9639/6004/10507/1378/8394/5996/6774/335/337/4594/10563/116/350/338328/2150/64115/5657/2041/9712/202243/7074/3655/2146/128637/253959/4914/375790/27237/1969/5909/55616/85440/84144/7813/8412/51107/1944/1942/23385
BP	GO:0036230	granulocyte activation	29	0.39829	1.98497	0.0045669	0.0290239	0.0204479	1871	tags=52%	list=25%	signal=39%	57126/5320/306/2205/3576/8807/1511/2213/2150/3579/820/301/3603/403313/4615
BP	GO:0007015	actin filament organization	168	0.223	1.78127	0.00456735	0.0290239	0.0204479	1645	tags=33%	list=22%	signal=26%	128239/1901/88/23500/7018/1236/4771/163782/4648/10395/5581/274/6711/51738/10178/11346/9639/4070/79729/1266/5339/9938/4703/8195/2934/335/5345/23075/4430/81624/2150/7082/55740/339768/57553/9026/10810/83543/7429/221692/283/85464/6387/28984/9037/7168/1739/6050/5217/5584/8976/5357/2041/5734/123016
BP	GO:0050730	regulation of peptidyl-tyrosine phosphorylation	56	0.306013	1.88842	0.00460048	0.0291978	0.0205705	1362	tags=38%	list=18%	signal=31%	7039/2261/26585/54206/10507/8784/5590/916/920/55024/7448/6423/3479/3976/374/3815/285489/7423/2252/2674/4254
BP	GO:1905818	regulation of chromosome separation	38	0.366663	2.01728	0.00462528	0.0292031	0.0205742	1903	tags=50%	list=25%	signal=38%	699/57405/9787/7272/332/11130/23397/1063/348654/220134/11065/55143/9700/9319/5347/54892/8881/701/9212
MF	GO:0031625	ubiquitin protein ligase binding	86	0.274202	1.91386	0.00463249	0.0292031	0.0205742	2824	tags=57%	list=38%	signal=36%	1191/3725/9636/7188/28951/958/3716/118424/10628/9627/8764/91/7531/57142/23381/440738/1734/152137/875/79899/8405/4086/637/5094/596/23197/322/26043/3320/10613/6497/8863/9927/7133/54546/65018/7805/9682/8915/11146/6125/1629/26191/10067/23208/149628/4720/8548/27101
BP	GO:0035590	purinergic nucleotide receptor signaling pathway	12	0.530254	1.89538	0.0046105	0.0292031	0.0205742	2191	tags=75%	list=29%	signal=53%	140/9934/5031/6900/1511/5026/5029/196527/5724
BP	GO:0051875	pigment granule localization	10	0.572454	1.88946	0.00463587	0.0292031	0.0205742	759	tags=50%	list=10%	signal=45%	583/10540/5861/1639/8195
BP	GO:0051904	pigment granule transport	10	0.572454	1.88946	0.00463587	0.0292031	0.0205742	759	tags=50%	list=10%	signal=45%	583/10540/5861/1639/8195
BP	GO:0051905	establishment of pigment granule localization	10	0.572454	1.88946	0.00463587	0.0292031	0.0205742	759	tags=50%	list=10%	signal=45%	583/10540/5861/1639/8195
BP	GO:0045840	positive regulation of mitotic nuclear division	21	0.475616	2.11898	0.00465895	0.0292879	0.020634	1888	tags=62%	list=25%	signal=46%	7039/940/9787/2069/3552/220134/3479/1908/11065/28984/5159/9700/8881
BP	GO:0010984	regulation of lipoprotein particle clearance	12	0.528865	1.89041	0.00466088	0.0292879	0.020634	1797	tags=67%	list=24%	signal=51%	26119/344/29116/9388/338328/6833/341/3949
BP	GO:0050671	positive regulation of lymphocyte proliferation	68	0.29608	1.93581	0.00474351	0.0296967	0.020922	1224	tags=31%	list=16%	signal=26%	149233/100133941/940/177/3574/3115/115352/3552/6504/958/1880/7292/1604/923/916/959/3485/3479/115650/3113/972
BP	GO:0032946	positive regulation of mononuclear cell proliferation	70	0.285815	1.88022	0.00474351	0.0296967	0.020922	1224	tags=30%	list=16%	signal=25%	149233/100133941/940/177/3574/3115/115352/3552/6504/958/1880/7292/1604/923/916/959/3485/3479/115650/3113/972
BP	GO:0045596	negative regulation of cell differentiation	242	0.203339	1.71939	0.00474094	0.0296967	0.020922	3314	tags=57%	list=44%	signal=33%	2200/259266/23500/2625/4771/53335/26585/2069/54855/3552/3142/79365/28951/605/7538/7292/6272/3399/10507/595/221476/7161/22920/6900/57540/57142/1378/63976/9241/9868/4318/6774/2213/6696/4320/10468/1048/3624/22943/6423/3479/6664/25928/374/144165/3400/1869/972/4192/151176/2254/10252/652/28514/7291/5997/9037/84814/1977/8993/8994/4086/6833/3135/7098/23532/6935/301/8362/2737/10272/8368/30009/4487/3949/21…
BP	GO:0030031	cell projection assembly	196	0.20694	1.69724	0.00476003	0.0297634	0.020969	2509	tags=44%	list=33%	signal=30%	1901/88/8556/23500/1236/3983/1183/26228/54443/583/10178/26751/688/9378/10806/4070/200162/54935/84173/5337/26052/1639/30845/84217/50649/8394/92749/85452/8195/92344/93594/23059/2934/170690/2150/144165/30846/3815/100506658/10810/83543/5365/57562/8632/3754/1012/5217/9576/8976/118491/56683/55764/123016/85302/90410/23613/23322/200894/84299/196527/57096/3320/123720/375790/49856/83715/2475/1969/9696/5592…
MF	GO:0046914	transition metal ion binding	369	0.180225	1.5771	0.00479635	0.0299536	0.021103	2650	tags=45%	list=35%	signal=30%	6241/1912/10125/2592/6419/7018/113612/2625/4317/60676/6097/6274/332/8110/1545/1593/51257/1036/7025/3552/978/540/7188/9869/84172/49860/7068/84676/5192/55624/55016/26009/150684/7799/55256/25797/5877/2736/1573/54802/84450/23400/6687/7227/81615/79710/389421/4318/920/54941/7644/337/3827/4320/1359/9023/5069/55247/9582/283208/54/771/1591/762/64399/250/23627/3039/6232/144165/64375/79152/51523/6821/3050/3…
BP	GO:0038065	collagen-activated signaling pathway	31	0.383464	1.96556	0.00482127	0.0300721	0.0211865	2297	tags=61%	list=31%	signal=43%	2261/2321/3791/4921/238/1288/3815/2050/7010/5156/1287/5159/2041/4914/1969/2046/2048/284656/7075
BP	GO:2000045	regulation of G1/S transition of mitotic cell cycle	58	0.310315	1.93667	0.00483301	0.0301083	0.021212	1840	tags=43%	list=25%	signal=33%	6241/9928/55159/57492/8110/2273/605/8462/595/4921/7015/51339/3624/1869/6347/9510/28984/1739/10106/637/301/6604/990/596/2146
MF	GO:0008009	chemokine activity	15	0.507412	1.97132	0.00491282	0.0304932	0.0214831	1534	tags=67%	list=20%	signal=53%	3576/6362/10563/6374/6367/5197/6368/6347/6387/4283
BP	GO:0070665	positive regulation of leukocyte proliferation	72	0.287918	1.90213	0.00491102	0.0304932	0.0214831	1224	tags=31%	list=16%	signal=26%	149233/100133941/940/177/3574/3115/115352/3552/6504/958/1880/7292/1604/923/916/959/3485/3479/115650/3815/3113/972
BP	GO:0010719	negative regulation of epithelial to mesenchymal transition	12	0.526611	1.88236	0.00491282	0.0304932	0.0214831	3561	tags=100%	list=47%	signal=53%	2625/9241/6423/10252/10459/55223/1942/4139/80204/200734/7422/2043
BP	GO:0071356	cellular response to tumor necrosis factor	64	0.300549	1.93154	0.00492714	0.0305074	0.0214931	1343	tags=36%	list=18%	signal=30%	2625/4317/1687/1545/3576/7538/958/2635/8718/8764/8784/4656/1116/55022/335/2167/10631/2150/115650/7057/6347/820/445
BP	GO:0061448	connective tissue development	112	0.243841	1.79591	0.00492366	0.0305074	0.0214931	3217	tags=59%	list=43%	signal=34%	4774/80310/2261/960/129642/2625/6097/26585/51738/583/54206/9451/8648/9462/10269/8195/7227/9241/1116/1311/6423/651/3400/875/7076/4192/5307/2254/5745/652/1396/5159/38/4086/6935/2737/64764/80856/4487/7045/388585/864/4146/353500/656/3491/1301/1435/7482/1893/3570/57326/7059/4209/5396/26254/947/142/7483/130497/4148/23369/151449/2355/91461/10736
BP	GO:0034394	protein localization to cell surface	25	0.406806	1.91584	0.0049656	0.030708	0.0216345	1031	tags=36%	list=14%	signal=31%	57126/88/919/150684/8514/9860/51542/23062/338328
MF	GO:0005125	cytokine activity	70	0.284292	1.8702	0.00498676	0.0308013	0.0217002	3559	tags=71%	list=47%	signal=38%	26585/3574/3552/3576/7044/7292/2662/959/6696/6362/10563/3624/6374/3976/6367/374/651/5197/51384/944/6368/6347/7076/7472/6387/652/4254/4283/3603/353500/656/1435/7482/356/29949/50604/11009/10637/7483/89780/151449/55258/27178/56300/27179/27177/26525/84639/7422/3557
MF	GO:0038064	collagen receptor activity	27	0.401667	1.94447	0.00504577	0.0311279	0.0219303	2297	tags=63%	list=31%	signal=44%	2261/2321/3791/4921/238/3815/2050/7010/5156/5159/2041/4914/1969/2046/2048/284656/7075
BP	GO:0038127	ERBB signaling pathway	68	0.294857	1.92782	0.00506784	0.031226	0.0219994	4383	tags=84%	list=58%	signal=35%	7039/2261/183/2069/2321/5284/54206/3791/84058/57142/4921/6464/238/4318/374/144165/3815/2050/9026/7429/7010/5156/1012/5159/2041/2537/4914/4878/1969/2046/2048/284656/7075/8412/3645/4653/356/27/6868/6654/55704/10461/26469/89853/2043/7879/634/1950/9961/5774/2322/5335/5782/4920/8895/51324/9564
BP	GO:0042743	hydrogen peroxide metabolic process	21	0.472407	2.10469	0.00508603	0.0312622	0.0220249	2135	tags=67%	list=28%	signal=48%	3047/4353/3240/3048/3043/337/3039/3050/137902/4129/847/2534/11315/65018
BP	GO:0007173	epidermal growth factor receptor signaling pathway	62	0.311676	1.98697	0.00508446	0.0312622	0.0220249	2297	tags=52%	list=31%	signal=36%	7039/2261/183/2069/2321/5284/54206/3791/84058/4921/6464/238/4318/374/144165/3815/2050/9026/7429/7010/5156/1012/5159/2041/2537/4914/4878/1969/2046/2048/284656/7075
BP	GO:0046006	regulation of activated T cell proliferation	15	0.506408	1.96741	0.00511437	0.0313224	0.0220673	1006	tags=47%	list=13%	signal=40%	149233/100133941/56253/177/6504/3485/3479
BP	GO:0048596	embryonic camera-type eye morphogenesis	12	0.525365	1.8779	0.00511437	0.0313224	0.0220673	1946	tags=75%	list=26%	signal=56%	65979/220/6664/51384/5076/2295/7291/6935/10370
BP	GO:0009410	response to xenobiotic stimulus	150	0.223751	1.74897	0.00510615	0.0313224	0.0220673	1608	tags=35%	list=21%	signal=28%	79762/113612/2625/6097/1545/2947/4837/1063/54206/3932/10628/595/7161/3339/1573/57103/2016/18/1385/64078/3485/5888/983/6423/117/7367/13/6579/8061/144165/80781/1869/11309/7057/2022/119391/590/445/8989/10512/51083/30/6716/4129/6833/6569/4316/7098/8647/2030/847/2627
BP	GO:0072676	lymphocyte migration	43	0.354133	2.02763	0.00512917	0.0313752	0.0221045	972	tags=33%	list=13%	signal=29%	1901/11240/257144/1236/2625/56253/1880/8764/5339/131450/1669/10563/9023/84830
CC	GO:0012507	ER to Golgi transport vesicle membrane	24	0.437788	2.0343	0.00514822	0.0314292	0.0221425	1224	tags=46%	list=16%	signal=38%	7039/3119/3115/3118/3117/3122/3120/374/3127/3113/972
BP	GO:0031667	response to nutrient levels	183	0.219807	1.77922	0.00515039	0.0314292	0.0221425	2547	tags=46%	list=34%	signal=31%	2200/249/4353/1545/3552/5723/51738/583/5443/7538/958/9451/84879/51100/57535/34/5337/5339/56270/8648/9462/6513/6900/23334/9563/81788/440738/8195/6696/3485/2/3624/6423/9388/10631/1591/5366/1268/83939/875/133/1442/5076/590/445/6716/38/6833/6569/6935/847/467/96459/3601/2033/3949/79726/596/2730/6009/5583/23274/29103/360/4914/2475/4524/23252/83667/8565/80149/64121/353500/9682/255738/5563/115209/84251/2…
BP	GO:0043954	cellular component maintenance	34	0.365998	1.93304	0.00520061	0.0316975	0.0223316	2283	tags=59%	list=30%	signal=41%	57126/6272/9699/84173/1639/1823/2213/27445/2150/144165/7082/91584/1739/5657/2534/80856/23613/51150/114784/9783
MF	GO:0005010	insulin-like growth factor receptor activity	27	0.400672	1.93965	0.00523093	0.0317677	0.0223811	2297	tags=63%	list=31%	signal=44%	2261/2321/3791/4921/238/3815/2050/7010/5156/5159/2041/4914/1969/2046/2048/284656/7075
BP	GO:0032231	regulation of actin filament bundle assembly	41	0.342067	1.92619	0.00522585	0.0317677	0.0223811	2164	tags=54%	list=29%	signal=38%	1901/4771/10395/11346/9639/4070/8195/335/5345/23075/7082/7429/28984/7168/5217/2041/5734/123016/2475/55160/55616/3925
BP	GO:0071763	nuclear membrane organization	18	0.45396	1.90242	0.0052262	0.0317677	0.0223811	3483	tags=89%	list=46%	signal=48%	91782/23175/1104/1639/983/27183/51510/1861/27348/5347/26092/148362/165324/6683/51652/23399
BP	GO:0048535	lymph node development	10	0.566725	1.87055	0.00525743	0.0318524	0.0224407	217	tags=40%	list=3%	signal=39%	3575/6097/9760/643
MF	GO:0005198	structural molecule activity	255	0.19789	1.67954	0.00525301	0.0318524	0.0224407	3630	tags=63%	list=48%	signal=34%	2200/1058/88/1310/3914/127435/4811/6711/261734/23499/79590/9699/8425/1832/5339/2192/3162/26052/3339/4703/10418/26249/1116/10562/920/6231/7448/2266/27445/1311/1295/3872/25878/10631/1288/4060/10381/6232/4606/80781/3730/84617/28988/3021/140032/6192/7057/5553/2201/137075/4147/1287/1415/81578/7168/1739/9883/9553/25873/6139/23542/7851/25763/5357/8362/8352/8368/85235/8342/8355/8348/8346/3849/8356/8347/8…
BP	GO:0043122	regulation of canonical NF-kappaB signal transduction	89	0.267212	1.87318	0.0052772	0.031896	0.0224714	2646	tags=53%	list=35%	signal=35%	10913/1236/79931/4919/57708/5581/7049/6574/3552/79971/7088/7188/958/3162/57449/10542/959/6774/920/2150/51523/972/64116/147699/7132/10211/1665/7098/8904/4795/3315/197358/4615/29110/5966/142678/65018/55223/80149/79753/541468/1491/8915/388646/56957/1893/6275
CC	GO:0030496	midbody	77	0.268348	1.80556	0.0052766	0.031896	0.0224714	614	tags=19%	list=8%	signal=18%	259266/9928/1731/91782/4751/332/54443/9493/1063/9816/84722/57448/5586/51100/6513
BP	GO:0060485	mesenchyme development	112	0.242283	1.78443	0.00531134	0.0320641	0.0225898	3653	tags=68%	list=49%	signal=35%	51176/116844/2625/183/26585/65979/7049/84172/157506/10507/57142/9241/22943/6423/3479/1908/144165/51384/80237/2022/4192/5076/6943/2295/2254/11096/10252/7472/28984/652/4254/1000/7291/9037/10512/6091/57181/7074/4487/81610/596/2146/6659/10370/1947/2475/10459/10630/55223/26508/10500/6275/8751/1942/64218/59349/4194/4139/89780/55746/9475/130497/10736/80204/200734/200558/84695/10505/54910/57669/23332/742…
BP	GO:0010965	regulation of mitotic sister chromatid separation	33	0.382974	2.01982	0.00540625	0.0325209	0.0229117	2073	tags=55%	list=28%	signal=40%	699/57405/9787/7272/332/11130/1063/348654/220134/11065/55143/9700/9319/5347/8881/701/9212/10459
BP	GO:0051306	mitotic sister chromatid separation	33	0.382974	2.01982	0.00540625	0.0325209	0.0229117	2073	tags=55%	list=28%	signal=40%	699/57405/9787/7272/332/11130/1063/348654/220134/11065/55143/9700/9319/5347/8881/701/9212/10459
BP	GO:0046635	positive regulation of alpha-beta T cell activation	33	0.382215	2.01582	0.00540625	0.0325209	0.0229117	779	tags=30%	list=10%	signal=27%	149233/940/9308/3142/3122/7292/1604/11126/5590/916
BP	GO:0098742	cell-cell adhesion via plasma-membrane adhesion molecules	76	0.28499	1.9092	0.00543772	0.0326328	0.0229905	1527	tags=36%	list=20%	signal=29%	57126/4680/84628/56253/6401/5792/9378/81607/57463/6403/22920/6900/84966/923/1823/1088/335/9620/1048/5101/5365/54510/137075/1000/1012/6091/1951
BP	GO:0072665	protein localization to vacuole	30	0.366815	1.85134	0.00543432	0.0326328	0.0229905	734	tags=30%	list=10%	signal=27%	1191/6272/51100/55187/57142/23334/10542/51542/23400
MF	GO:0050840	extracellular matrix binding	26	0.410321	1.96893	0.00547463	0.032757	0.023078	3516	tags=85%	list=47%	signal=45%	9806/4811/169611/25903/6696/7448/3958/131578/7057/11096/3655/7045/375790/64856/64129/3491/1301/1520/7837/4052/7422/6678
BP	GO:0043903	regulation of biological process involved in symbiotic interaction	14	0.506834	1.89964	0.00547781	0.032757	0.023078	1224	tags=57%	list=16%	signal=48%	3576/5443/2192/920/51297/9023/2150/972
BP	GO:0032753	positive regulation of interleukin-4 production	14	0.506406	1.89803	0.00547781	0.032757	0.023078	1496	tags=57%	list=20%	signal=46%	940/2625/7292/5590/916/959/5553/1051
BP	GO:0002363	alpha-beta T cell lineage commitment	18	0.45026	1.88691	0.00561693	0.03351	0.0236085	2069	tags=61%	list=28%	signal=44%	4063/149233/9760/3716/6774/10538/30009/2033/596/1514/2475
BP	GO:0043369	CD4-positive or CD8-positive alpha-beta T cell lineage commitment	18	0.45026	1.88691	0.00561693	0.03351	0.0236085	2069	tags=61%	list=28%	signal=44%	4063/149233/9760/3716/6774/10538/30009/2033/596/1514/2475
BP	GO:0045069	regulation of viral genome replication	28	0.390966	1.90763	0.00565045	0.0336703	0.0237215	522	tags=29%	list=7%	signal=27%	940/3434/7153/91543/3576/9636/6041/5586
CC	GO:0101002	ficolin-1-rich granule	67	0.291552	1.90645	0.00566712	0.03373	0.0237636	1257	tags=33%	list=17%	signal=28%	8972/116844/5265/978/83858/55276/3310/1832/1604/25797/23114/1378/1675/1823/4318/2934/3043/3958/1/28988/3608/5553
BP	GO:0030902	hindbrain development	57	0.312653	1.93455	0.00567805	0.0337386	0.0237696	881	tags=28%	list=12%	signal=25%	9928/51176/10395/79971/9378/8704/2662/8648/2736/473/256297/916/9241/18/3212/2213
BP	GO:0001701	in utero embryonic development	140	0.226799	1.74554	0.00568186	0.0337386	0.0237696	2595	tags=49%	list=35%	signal=32%	6241/51176/2625/4751/284723/54855/5723/9644/639/824/157506/57448/2034/91/8648/25949/57142/2016/343263/51542/57498/9241/53918/201895/3479/3976/81624/8061/154197/133/84660/79733/7472/5745/5156/7291/4097/23764/1051/54700/2627/2737/23081/4487/54892/23322/675/7014/9837/10370/338/9927/23038/2709/2707/3633/7075/149473/4678/6491/84871/1376/27022/3491/4853/56957/84072/405
BP	GO:0051304	chromosome separation	40	0.343011	1.91384	0.00572914	0.0339398	0.0239113	1903	tags=48%	list=25%	signal=36%	699/57405/9787/7272/332/11130/23397/1063/348654/220134/11065/55143/9700/9319/5347/54892/8881/701/9212
BP	GO:0071396	cellular response to lipid	224	0.202802	1.69466	0.00572298	0.0339398	0.0239113	1450	tags=28%	list=19%	signal=23%	11240/4317/4064/26228/8564/6097/79931/1545/54541/5581/3552/5176/3576/5732/129607/7538/958/54206/7292/257101/842/2635/824/7100/3399/5031/8648/1604/64754/4656/51542/164091/923/1511/1669/4318/1385/3779/55022/6696/5244/10563/3624/84830/6374/1591/23641/5197/56937/8284/6347/84660/5076/820/6943/7472/4314/445/1066/890/10417/1977/6340
MF	GO:0005253	monoatomic anion channel activity	35	0.365209	1.95338	0.005743	0.0339476	0.0239168	2501	tags=66%	list=33%	signal=44%	1183/55248/4948/2556/5026/63982/1184/203859/55129/196527/1179/1185/1187/1188/266675/6512/7809/55283/9635/22802/23507/84230/23155
BP	GO:0033059	cellular pigmentation	28	0.389712	1.90152	0.00574384	0.0339476	0.0239168	1992	tags=54%	list=27%	signal=40%	84079/583/5443/10540/89781/5861/1639/8195/25825/23682/10981/967/162/596/8934
BP	GO:0048598	embryonic morphogenesis	223	0.195695	1.63435	0.00579779	0.0342265	0.0241134	3421	tags=58%	list=46%	signal=33%	2200/3899/51176/2625/4317/4771/26585/65979/2321/3914/10395/79971/3142/157506/8434/8575/8648/27245/2736/25949/7709/1855/8195/9241/3212/23059/7289/51339/4318/335/9620/7448/220/1295/5950/3624/22943/6423/6664/1738/144165/51384/10586/2022/133/5076/5307/6943/2295/2254/2201/7472/2114/652/5156/28514/7291/8516/1739/2535/3235/4086/6935/5357/2627/2737/3216/55764/80856/4487/23322/200894/10370/6497/388585/388…
BP	GO:0001523	retinoid metabolic process	25	0.403685	1.90115	0.00581683	0.0342592	0.0241363	1389	tags=48%	list=18%	signal=39%	10901/9249/1545/157506/54884/317749/220/5950/10170/5919/124/125
BP	GO:0016101	diterpenoid metabolic process	25	0.403685	1.90115	0.00581683	0.0342592	0.0241363	1389	tags=48%	list=18%	signal=39%	10901/9249/1545/157506/54884/317749/220/5950/10170/5919/124/125
BP	GO:0003044	regulation of systemic arterial blood pressure mediated by a chemical signal	20	0.454401	1.9786	0.00583343	0.0343171	0.0241771	1648	tags=60%	list=22%	signal=47%	183/1907/6518/1511/5345/1359/1908/2150/10699/7168/8509/552
MF	GO:0019207	kinase regulator activity	96	0.25916	1.84783	0.00586205	0.0344455	0.0242676	2025	tags=42%	list=27%	signal=31%	7039/100133941/645121/26228/26585/2069/51738/28951/8900/54920/8503/595/2662/8575/245711/238/57498/959/8115/2810/197/374/79817/5575/28984/652/890/80174/64798/23542/9175/11113/1163/3315/6009/7273/5583/113791/81669/55210
BP	GO:1903829	positive regulation of protein localization	186	0.208873	1.69735	0.00588443	0.034537	0.0243321	2197	tags=41%	list=29%	signal=30%	919/4771/5581/3552/79971/6711/51738/10178/89781/9378/3716/5208/9451/118424/7203/51100/7531/65220/9860/57142/10542/7015/51112/5590/388581/23400/1855/18/9868/640/2266/3958/2810/5950/983/3479/2150/208/4248/23255/7429/283/2040/23682/652/79899/1739/57214/5584/5007/6833/5357/2534/2737/5347/10802/5532/2033/3783/7097/6526/322/6659/7273/5583/3320/8934/27237/11315/1969/9696/65018/2048/8431/83667/2035
BP	GO:0050926	regulation of positive chemotaxis	16	0.487147	1.9547	0.00592109	0.0347119	0.0244553	2474	tags=75%	list=33%	signal=50%	1901/177/3576/3791/2150/7423/6387/1012/3603/1233/9048/2152
BP	GO:0051303	establishment of chromosome localization	60	0.30276	1.91003	0.00594998	0.034841	0.0245463	712	tags=23%	list=9%	signal=21%	9928/1731/91782/57405/7272/4751/332/11130/10540/1063/11004/84722/245711/51112
BP	GO:0090596	sensory organ morphogenesis	117	0.239049	1.78351	0.00596567	0.0348926	0.0245826	2566	tags=51%	list=34%	signal=34%	2200/2625/65979/639/84879/3791/7068/8575/2780/256297/1855/9241/6774/220/1295/5950/6664/118427/51384/5076/2295/2254/2201/7472/652/28514/7291/8516/23554/2535/5584/1735/6935/5357/2737/6094/55764/123016/4487/596/23322/128637/6659/10370/57096/148398/6497/9927/1969/4237/2048/57822/1296/9132/2301/8412/1301/7482/204851/4853
BP	GO:0110053	regulation of actin filament organization	100	0.247885	1.7852	0.00598148	0.0349448	0.0246194	1645	tags=35%	list=22%	signal=28%	1901/88/23500/1236/4771/163782/10395/5581/274/6711/10178/11346/9639/4070/8195/2934/335/5345/23075/2150/7082/9026/10810/7429/85464/6387/28984/9037/7168/1739/6050/5217/2041/5734/123016
BP	GO:1902624	positive regulation of neutrophil migration	15	0.499628	1.94107	0.00602581	0.0351229	0.0247448	1249	tags=53%	list=17%	signal=45%	1236/3552/3554/3576/57142/972/4192/3579
BP	GO:2001239	regulation of extrinsic apoptotic signaling pathway in absence of ligand	12	0.518893	1.85477	0.00602581	0.0351229	0.0247448	1820	tags=67%	list=24%	signal=51%	3574/3552/2140/7015/3624/51741/2537/596
BP	GO:0098773	skin epidermis development	48	0.316288	1.86237	0.00604108	0.0351311	0.0247506	2695	tags=60%	list=36%	signal=39%	10913/7357/91/5339/10269/2736/92344/1823/10468/2810/3624/22943/3872/25928/79152/2252/94234/28514/51083/2627/596/57822/3925/126695/114803/388697/2312/388698/84283
BP	GO:1901989	positive regulation of cell cycle phase transition	48	0.316033	1.86088	0.00604108	0.0351311	0.0247506	1888	tags=46%	list=25%	signal=35%	6241/9787/332/995/51514/49860/595/4921/7015/983/220134/11065/9510/28984/80174/301/9700/6604/990/81610/2146/8881
BP	GO:0051346	negative regulation of hydrolase activity	40	0.342486	1.91091	0.00606863	0.0352129	0.0248083	2769	tags=65%	list=37%	signal=41%	9806/274/5176/6272/8434/1378/5345/7448/710/5365/7076/8530/5997/653145/1475/341/3001/7014/23143/1676/55920/93974/27329/1893/325/336
BP	GO:0007052	mitotic spindle organization	67	0.290575	1.90006	0.00606904	0.0352129	0.0248083	1903	tags=42%	list=25%	signal=31%	55125/91782/57405/9787/7272/4751/332/9493/6905/10540/9639/84722/1104/1639/114327/79866/22974/144165/55143/57562/7283/3833/51510/5347/29127/3832/24137/9212
BP	GO:0002347	response to tumor cell	19	0.448671	1.91914	0.00608141	0.0352444	0.0248304	716	tags=37%	list=10%	signal=33%	56253/1687/10628/3140/5551/100507436/11126
BP	GO:0021549	cerebellum development	35	0.363843	1.94607	0.00609915	0.0353068	0.0248744	1363	tags=40%	list=18%	signal=33%	9928/9378/8704/2662/8648/2736/473/256297/916/18/2213/875/4192/28514
MF	GO:0140657	ATP-dependent activity	212	0.203297	1.68381	0.00610931	0.0353253	0.0248875	1822	tags=33%	list=24%	signal=26%	9928/249/225/79895/154664/146909/7153/9493/4648/340273/27030/540/245972/155066/83858/4998/164045/11004/3310/84879/8886/7203/57198/245973/4343/127124/64222/2956/11321/23020/23095/23400/6687/55729/23120/79710/11325/5244/122402/5888/4430/10112/28965/8653/55510/5190/201625/8632/10924/3833/5217/55567/5892/6833/1665/55760/3835/8647/27183/1861/9319/27348/246269/990/3070/10721/3832/4439/490/24137
BP	GO:1902850	microtubule cytoskeleton organization involved in mitosis	79	0.278335	1.8867	0.00614943	0.0354764	0.0249939	1822	tags=39%	list=24%	signal=30%	1058/55125/91782/57405/9787/7272/4751/332/9493/6905/10540/9639/84722/1104/1639/114327/79866/983/22974/144165/55143/57562/10252/7283/3833/9700/51510/5347/29127/3832/24137
MF	GO:0017111	ribonucleoside triphosphate phosphatase activity	267	0.189832	1.62258	0.00614713	0.0354764	0.0249939	3857	tags=64%	list=51%	signal=32%	9928/249/225/79895/1731/154664/146909/9493/340273/27030/540/2791/83858/4998/164045/11004/3310/2635/8886/7203/57198/5861/6004/83452/2780/26052/4343/127124/64222/11321/23020/23095/151011/23400/6687/55729/23120/5996/168537/79710/11325/5244/122402/4594/5888/10112/10381/116987/8653/84617/148252/55510/5190/201625/23682/51285/8490/65997/10924/387496/5997/3833/5217/55567/5892/10981/285282/6833/2775/4599/…
BP	GO:0016485	protein processing	97	0.251628	1.79978	0.00615726	0.0354812	0.0249973	3165	tags=61%	list=42%	signal=36%	7850/1803/3240/842/824/151516/10269/6900/58484/136242/6687/10418/1511/2934/5345/715/2266/1311/350/25825/8728/3816/7057/219743/64115/590/10699/4311/3250/3818/5046/29100/2737/121665/91419/26022/1514/63929/79258/1889/3633/255738/115209/84938/2152/148738/51107/1520/23385/5972/1510/84976/163859/142/5664/83932/56605/6868/26160
BP	GO:0007600	sensory perception	236	0.19791	1.66855	0.00616564	0.0354892	0.0250029	3274	tags=57%	list=44%	signal=33%	8556/51176/54463/3983/332/9249/1687/79290/4648/4919/5284/583/83756/2140/7068/4070/6004/157506/55624/2034/84173/2780/391107/9860/391192/130557/1261/8195/5950/81624/5368/4060/152137/339768/80781/3815/6347/4923/60675/390072/5076/6387/9536/8989/1415/4311/2535/6340/57214/56656/1472/2534/6094/123016/2782/7045/57096/4914/6339/83715/80835/765/80834/127534/5538/9132/149461/7809/6121/1429/24/1301/22911/128…
BP	GO:0043547	positive regulation of GTPase activity	52	0.314048	1.90075	0.00618898	0.0355429	0.0250407	2470	tags=58%	list=33%	signal=39%	10125/143872/9639/6004/10507/8394/5996/4594/10563/116/2150/5657/2041/9712/202243/7074/3655/2146/128637/253959/4914/375790/27237/1969/5909/55616/85440/84144/7813/8412
BP	GO:0061982	meiosis I cell cycle process	52	0.313769	1.89906	0.00618898	0.0355429	0.0250407	2593	tags=58%	list=35%	signal=38%	7153/11130/27030/995/8900/164045/84944/245711/2956/22887/122402/5888/84057/9088/7589/5892/9700/9232/9319/5347/4439/675/991/8438/55706/4438/676/388649/6847/84072
BP	GO:0006259	DNA metabolic process	331	0.181732	1.57756	0.0062092	0.0356186	0.0250941	4261	tags=69%	list=57%	signal=31%	4774/940/6419/51176/3575/55159/64919/57492/306/7153/4751/2069/8110/199990/1545/27030/63967/6282/4998/605/1063/958/164045/79000/51514/7292/2140/51455/7203/23175/3399/348654/150684/54936/7161/245711/10269/2736/2956/57103/7015/23381/51542/58511/959/1647/23075/5888/55247/9582/983/9768/84057/6874/875/79733/28984/7291/1602/890/80174/2305/125476/6749/5159/10538/5892/3835/5425/51053/6604/9232/9319/30009/…
BP	GO:0032928	regulation of superoxide anion generation	12	0.515924	1.84416	0.00622836	0.0356881	0.0251431	1054	tags=50%	list=14%	signal=43%	57126/183/5581/84329/54/2150
BP	GO:0007249	canonical NF-kappaB signal transduction	96	0.256662	1.83002	0.00625547	0.035803	0.025224	2646	tags=52%	list=35%	signal=34%	10913/1236/79931/4919/57708/5581/7049/6574/3552/79971/7088/7188/958/3162/57449/10542/959/6774/920/2150/51523/972/64116/9770/147699/7132/10211/1665/7098/8904/4795/2033/3315/197358/7097/4615/29110/5966/142678/65018/55223/80149/79753/541468/1491/8915/388646/56957/1893/6275
BP	GO:0021761	limbic system development	54	0.311419	1.90189	0.00633589	0.0361905	0.025497	1093	tags=30%	list=15%	signal=26%	9928/51176/306/4771/23035/583/84879/55624/7531/8648/238/63827/8195/220/140679/3400
CC	GO:0030667	secretory granule membrane	119	0.245798	1.83705	0.00633744	0.0361905	0.025497	1592	tags=34%	list=21%	signal=27%	57126/4680/79895/8972/960/154664/6571/5284/83858/963/79888/1832/6403/5337/1604/23114/8514/307/6518/1378/1823/932/1088/84329/3958/762/8876/53831/4973/3579/353189/2040/116843/4311/29106/967/2215/64114/10890/8904
BP	GO:0019953	sexual reproduction	337	0.182074	1.58357	0.00636428	0.0363029	0.0255762	3978	tags=65%	list=53%	signal=32%	90853/259266/1912/51361/1731/7153/7272/4751/2069/83416/11130/115352/2352/27030/55342/3552/583/995/8900/23397/164045/639/4948/7203/84058/200162/8654/80705/84944/245711/2956/84217/3953/92749/23139/136242/51542/164091/8195/22887/54585/6774/9389/174/84329/10863/122402/5888/10468/3624/170690/983/220134/84057/3479/3976/117/23627/9088/8061/1738/8653/3815/124535/80237/1268/8287/3021/199223/154197/4192/28…
BP	GO:0000226	microtubule cytoskeleton organization	242	0.200023	1.69134	0.00638343	0.0363712	0.0256243	1177	tags=23%	list=16%	signal=20%	259266/1058/8556/55125/51361/1731/91782/146909/57405/9787/7272/4751/332/9493/26586/583/6905/10540/11004/79000/9639/10806/84722/58497/348654/200162/1104/64793/1639/6900/84217/79745/114327/92749/5590/1855/85452/122060/23059/1647/79866/10112/983/220134/9768/22974/81624/284076/10381/399693/89927/144165/55143/84617/23255/100506658
BP	GO:0016202	regulation of striated muscle tissue development	15	0.497887	1.93431	0.0064309	0.0365595	0.025757	1843	tags=67%	list=25%	signal=50%	51176/1063/4656/1385/652/28514/7291/10211/596/57158
BP	GO:0048634	regulation of muscle organ development	15	0.497887	1.93431	0.0064309	0.0365595	0.025757	1843	tags=67%	list=25%	signal=50%	51176/1063/4656/1385/652/28514/7291/10211/596/57158
BP	GO:0016331	morphogenesis of embryonic epithelium	55	0.311332	1.91251	0.00646003	0.036684	0.0258447	2526	tags=58%	list=34%	signal=39%	2625/26585/65979/10395/157506/1855/9241/23059/7289/9620/220/6423/6664/144165/51384/133/5076/7472/652/7291/55764/10370/6497/388585/4524/7798/57822/126695/6491/8915/11146/7482
BP	GO:0007143	female meiotic nuclear division	19	0.447636	1.91471	0.00647061	0.036703	0.0258581	360	tags=32%	list=5%	signal=30%	1731/7153/7272/2069/27030/23397
BP	GO:0044089	positive regulation of cellular component biogenesis	186	0.207209	1.68383	0.00648411	0.0367385	0.0258831	2567	tags=46%	list=34%	signal=31%	54674/129293/1236/1191/4771/183/54443/5581/274/9636/51738/10178/261734/11346/9378/9639/6382/57463/3791/84722/10507/51100/57535/26052/1639/388630/23400/122060/8631/335/5345/23075/10563/3958/220134/2150/8739/3815/23316/100506658/9026/7429/7010/4314/28984/7168/1739/5217/8976/10211/637/27183/55832/2041/96459/92359/90410/23613/4615/84299/3320/4914/375790/49856/11315/22883/2475/10459/1969/9696/55160/65…
BP	GO:0043266	regulation of potassium ion transport	40	0.341261	1.90408	0.00649301	0.0367478	0.0258896	2089	tags=52%	list=28%	signal=38%	88/274/2273/57463/7531/845/8514/3779/1908/3759/3754/1739/51083/967/6833/482/3783/29843/196527/4878/126755
BP	GO:0045682	regulation of epidermis development	31	0.374254	1.91835	0.00653345	0.0369355	0.0260219	3314	tags=77%	list=44%	signal=43%	5920/4610/7538/54206/2810/652/28514/4097/23764/3849/2146/222223/2137/5583/360/388585/126695/8643/84283/5317/50604/29841/9475/130120
BP	GO:0030183	B cell differentiation	67	0.286826	1.87555	0.00663173	0.0374174	0.0263614	1840	tags=43%	list=25%	signal=33%	9452/939/1380/974/3574/115352/1880/9734/8503/1378/959/29760/2213/931/5450/930/3507/3624/3815/7163/1316/22806/28514/6482/285282/96459/2033/596/2146
BP	GO:0045954	positive regulation of natural killer cell mediated cytotoxicity	12	0.513475	1.8354	0.00663345	0.0374174	0.0263614	716	tags=42%	list=10%	signal=38%	4068/10125/56253/8807/11126
BP	GO:0031175	neuron projection development	373	0.178631	1.56351	0.00665537	0.0374993	0.0264191	2031	tags=35%	list=27%	signal=27%	4681/9334/10642/84628/64919/84079/2625/53335/9760/177/5792/57699/7025/5176/26227/51738/6905/605/9378/11178/84879/23499/57463/9699/10507/84173/2051/10154/29116/26052/1996/4343/6900/23114/9860/2736/57142/23334/1907/4921/473/4660/9890/343472/238/2016/5590/51542/1855/57498/916/9241/1385/337/6696/22943/27319/6423/10631/116/1908/10381/374/144165/55740/3730/28988/23413/23316/1268/4884/91584/5365/221692/…
BP	GO:0001914	regulation of T cell mediated cytotoxicity	21	0.459224	2.04595	0.00670212	0.0377208	0.0265751	881	tags=38%	list=12%	signal=34%	911/149233/3575/177/3122/3140/910/2213
BP	GO:0061384	heart trabecula morphogenesis	12	0.512484	1.83186	0.00673472	0.0377883	0.0266227	1306	tags=58%	list=17%	signal=48%	1901/7049/9241/5950/7010/2022/9510
BP	GO:0051146	striated muscle cell differentiation	123	0.238805	1.79417	0.00672847	0.0377883	0.0266227	2069	tags=41%	list=28%	signal=31%	5738/88/26585/79365/80206/688/6382/824/6272/9734/963/34/5339/221476/10269/4703/64754/4656/9868/1048/22943/983/3479/144165/4606/30846/11096/6444/652/5156/28514/1000/5997/84814/7168/5159/10211/4283/2627/552/90410/4487/5532/596/2146/10529/9043/7273/4629/6497/2475
MF	GO:0016301	kinase activity	273	0.189321	1.61991	0.00673646	0.0377883	0.0266227	3004	tags=50%	list=40%	signal=31%	26289/699/2261/204/3702/7272/817/4751/2321/5581/7049/22848/129607/3932/3716/347736/5208/23683/9451/3791/84451/8425/8503/6041/5586/595/8491/91/2051/9578/10746/65220/83931/4921/8394/56997/238/81788/23139/5590/5600/282974/10000/5613/55361/640/5616/27010/55872/983/25928/208/9088/3815/5218/2050/1158/8395/7010/6347/54101/56975/9770/5156/1739/5584/5159/55500/64781/2534/2041/9891/9175/11113/814/5255/5347…
BP	GO:0007422	peripheral nervous system development	27	0.394796	1.91121	0.0068048	0.0380066	0.0267765	2811	tags=70%	list=37%	signal=44%	2947/6905/9639/5339/23114/576/983/208/79152/91584/3235/10370/400746/6497/864/9048/7412/60484/4653
BP	GO:0042119	neutrophil activation	27	0.394038	1.90754	0.0068048	0.0380066	0.0267765	1871	tags=52%	list=25%	signal=39%	57126/5320/306/3576/8807/1511/2213/2150/3579/820/301/3603/403313/4615
BP	GO:0141091	transforming growth factor beta receptor superfamily signaling pathway	118	0.24455	1.82562	0.00680536	0.0380066	0.0267765	1786	tags=38%	list=24%	signal=30%	2200/4774/4681/51176/116844/9404/3725/26585/7049/3791/8425/91/2662/63976/9241/53918/6774/10468/83891/1311/3624/22943/6423/6664/25928/56937/8287/7057/2022/2254/4093/10252/2201/652/65997/8516/4086/5046/6935/2627/10272/4487/84312/5796/2033
CC	GO:0000775	chromosome centromeric region	97	0.249419	1.78398	0.00678474	0.0380066	0.0267765	3993	tags=72%	list=53%	signal=34%	699/1058/91782/57405/7153/7272/4751/332/11130/10540/1063/11004/25909/253635/1639/51112/220134/55143/23255/3021/9770/1051/3835/8362/51510/8368/5347/3070/23081/2146/8294/701/9212/151648/55920/7798/991/9682/23421/2959/6847/11243/83540/91687/7175/5525/25936/5664/55746/79677/79172/7514/51652/23332/8335/79023/147841/8360/891/3619/79723/57082/64151/54984/5314/55355/11177/90417/221150/201161
CC	GO:0005604	basement membrane	43	0.345591	1.97872	0.00682473	0.0380728	0.0268231	3098	tags=70%	list=41%	signal=41%	2200/3914/4811/5176/2192/3339/158326/7448/1295/1288/80781/7076/283/9510/4147/1287/1739/8573/7045/375790/64856/1307/1296/255631/3915/3918/83872/3898/7399/7837
BP	GO:0032467	positive regulation of cytokinesis	24	0.426781	1.98315	0.00684851	0.0381635	0.026887	2117	tags=58%	list=28%	signal=42%	9928/8556/332/643/9493/5581/5586/79848/55143/11113/990/29127/9212/80834
BP	GO:0001667	ameboidal-type cell migration	89	0.262218	1.83817	0.00694366	0.0386513	0.0272307	1510	tags=36%	list=20%	signal=29%	116844/23500/54443/65979/5581/23499/4070/10507/5586/91/5339/57142/4921/8394/4318/1908/3815/7429/7057/7076/2201/2252/652/4254/1000/79899/7291/114757/9037/10512/5217/4163
BP	GO:0002820	negative regulation of adaptive immune response	35	0.359218	1.92133	0.00698952	0.0388213	0.0273505	4216	tags=89%	list=56%	signal=39%	55061/9173/3575/1380/6504/7292/8764/1378/11126/2213/3821/3135/30009/5532/9466/80149/51043/149041/5788/722/1379/4179/84695/634/80762/3824/3077/5987/259307/383/3566
BP	GO:0002275	myeloid cell activation involved in immune response	35	0.359178	1.92112	0.00698952	0.0388213	0.0273505	634	tags=26%	list=8%	signal=24%	57126/10125/6571/306/2205/5581/6504/9111/8291
BP	GO:0045926	negative regulation of growth	73	0.281234	1.8665	0.00701386	0.0388713	0.0273857	2079	tags=45%	list=28%	signal=33%	2261/53335/26585/978/2273/583/84722/87178/91/221476/7161/57142/5600/9241/9868/6696/5950/3624/1081/6423/55840/58189/5997/9037/4502/51316/4487/596/9043/10370/80128/374946/4879
MF	GO:0019825	oxygen binding	14	0.496662	1.86151	0.0070136	0.0388713	0.0273857	1375	tags=57%	list=18%	signal=47%	3047/3048/3043/6999/3039/3050/875/114757
BP	GO:0060395	SMAD protein signal transduction	26	0.402886	1.93325	0.00703877	0.0388819	0.0273932	1503	tags=50%	list=20%	signal=40%	7272/3725/26585/7049/6711/9241/3624/22943/56937/2022/4093/652/4086
BP	GO:0002717	positive regulation of natural killer cell mediated immunity	15	0.493862	1.91868	0.00703853	0.0388819	0.0273932	716	tags=40%	list=10%	signal=36%	4068/10125/56253/8807/117157/11126
CC	GO:0043005	neuron projection	448	0.166727	1.48567	0.00702717	0.0388819	0.0273932	3187	tags=50%	list=42%	signal=31%	26119/88/8556/10642/84628/64919/84079/57125/6571/1191/1269/306/4771/57565/817/140/9249/11130/5792/4919/23035/57699/274/5176/6711/22848/51738/583/10178/10540/261734/958/11346/9378/11178/824/57463/10806/26278/84173/34/5339/2051/2780/284697/57449/26052/22920/1996/3339/1639/6900/23114/8514/9860/57142/3352/57657/1261/23095/5590/23400/1855/8195/6687/916/55361/2213/118812/2556/27445/116/22974/54886/5368…
BP	GO:0005977	glycogen metabolic process	28	0.383413	1.87078	0.00705136	0.0389091	0.0274123	1098	tags=39%	list=15%	signal=34%	80183/5443/55276/34/56270/83931/3953/2887/3479/208/79660
BP	GO:0009636	response to toxic substance	100	0.243682	1.75493	0.00707611	0.0390032	0.0274786	1835	tags=40%	list=24%	signal=31%	3047/4353/3240/6571/3048/1545/5581/2947/540/6382/7782/3043/337/5888/983/2952/3039/6565/3050/5783/9963/64116/8242/5742/119391/445/9536/114757/1066/115703/137902/4129/10202/1665/847/2627/4502/4259/596/7097
BP	GO:1901992	positive regulation of mitotic cell cycle phase transition	40	0.33875	1.89007	0.00708713	0.0390215	0.0274915	1707	tags=45%	list=23%	signal=35%	6241/9787/332/995/51514/595/4921/7015/983/220134/11065/9510/28984/80174/301/9700/6604/990
BP	GO:0034220	monoatomic ion transmembrane transport	337	0.180817	1.57265	0.00710864	0.0390975	0.0275451	2531	tags=44%	list=34%	signal=30%	88/777/6571/1236/1183/817/183/5581/255231/6574/274/2273/4707/540/245972/155066/3932/3772/57463/55248/4948/57198/131096/245973/150684/5031/7531/94097/845/127124/8514/57657/1261/23400/57685/374291/6687/81615/8645/55013/4318/6947/64078/3779/7782/931/930/84329/2556/5026/51297/117/3773/1908/140679/348938/283537/3759/6565/206358/23413/9963/56479/64116/6347/4923/2040/7225/30061/285195/116843/3754/8989/1…
BP	GO:0055007	cardiac muscle cell differentiation	49	0.331029	1.96629	0.00713135	0.0391799	0.0276031	2069	tags=51%	list=28%	signal=37%	88/26585/80206/34/5339/221476/10269/4703/9868/22943/983/3479/144165/6444/652/5156/28514/5997/5159/2627/90410/10529/7273/4629/2475
BP	GO:0052548	regulation of endopeptidase activity	31	0.372059	1.9071	0.00716425	0.0393181	0.0277005	1321	tags=42%	list=18%	signal=35%	9806/177/274/5176/8434/1378/23400/6774/5345/7448/710/7076/64115
BP	GO:0050727	regulation of inflammatory response	160	0.216764	1.72292	0.0071877	0.0394041	0.0277611	1897	tags=37%	list=25%	signal=28%	9173/5320/940/1236/2625/4317/26228/6401/183/177/3554/8808/2840/51738/7538/7292/9111/2635/58484/388581/131450/1991/4318/6774/335/2213/2167/55872/54/3479/197/100313774/1268/64116/7010/4192/8530/1075/58189/4314/9536/3818/8993/1051/7132/7098/5624/25827/301/2534/79918/5734/3603/11274/3949/197358/7097/4615/5687
BP	GO:1904375	regulation of protein localization to cell periphery	55	0.309942	1.90397	0.00721021	0.0394423	0.027788	3053	tags=65%	list=41%	signal=39%	26119/817/5581/6711/11004/9378/5590/54585/81831/55022/3958/2810/131578/7429/23682/1739/5584/64114/27183/5357/5347/5583/27237/6248/1969/2048/2035/84455/2633/29899/5317/493/5525/127018/89780/163882
CC	GO:0005740	mitochondrial envelope	241	0.196114	1.65768	0.00720469	0.0394423	0.027788	4822	tags=80%	list=64%	signal=29%	5320/249/204/80342/113612/1191/8564/1593/284723/91543/995/4707/83858/5498/79590/23175/80775/87178/84069/51100/34/5339/3162/7531/2820/94097/29957/57103/374291/6687/9868/55013/9389/55333/3958/1591/5366/6821/1268/89874/2628/445/57038/9553/10981/55173/4129/637/197257/5250/6652/9551/23464/6048/246269/2537/84749/1349/4259/3429/596/100287932/10166/57019/153768/4891/60558/139322/79944/4724/29103/54998/55…
BP	GO:2000463	positive regulation of excitatory postsynaptic potential	10	0.554326	1.82962	0.00723542	0.0395375	0.027855	1267	tags=60%	list=17%	signal=50%	9378/9699/5590/1855/23316/5575
BP	GO:0014910	regulation of smooth muscle cell migration	33	0.373167	1.9681	0.00728277	0.0397106	0.027977	1472	tags=45%	list=20%	signal=37%	80310/1545/6282/5031/4921/7015/7448/10631/3479/4192/2254/9510/652/7168/5159
BP	GO:0031344	regulation of cell projection organization	253	0.18746	1.58675	0.00727935	0.0397106	0.027977	2148	tags=38%	list=29%	signal=28%	84628/84079/960/23500/1236/2625/26228/53335/9760/54443/5792/7025/5176/10178/26751/688/9378/11178/84879/23499/57463/10806/4070/10507/5337/10154/29116/26052/1996/4343/6900/9860/57142/4921/238/1855/57498/2213/6696/170690/22943/6423/2150/3815/23413/23316/1268/100506658/7429/5365/4192/6387/5997/9037/115703/8507/57520/5217/5584/10251/6091/8976/4086/5357/2534/482/9175/23426/90410/23613/7074/3601/2033/36…
BP	GO:0007566	embryo implantation	26	0.402048	1.92923	0.0073148	0.0397973	0.0280381	1314	tags=46%	list=17%	signal=38%	54206/84172/91/2192/8434/3339/4318/6696/3976/3021/7076/2201
BP	GO:0021915	neural tube development	58	0.304233	1.89871	0.00731142	0.0397973	0.0280381	3357	tags=71%	list=45%	signal=39%	65979/10395/26227/2736/1855/9241/23059/7289/51339/9620/6423/144165/133/5076/652/7291/10512/2737/55764/23322/200894/10370/6497/388585/4524/1969/7798/57822/55182/6491/8915/11146/57216/23432/5362/89780/55746/151449/26160/51057/54910
BP	GO:0043603	amide metabolic process	149	0.217173	1.69179	0.00732219	0.0397973	0.0280381	4812	tags=83%	list=64%	signal=30%	1803/9334/7357/5920/1191/3034/2947/274/4837/79814/55229/284486/57142/57103/80896/10418/1511/27010/4594/6999/3479/2952/25825/1738/79152/8876/4248/384/119391/590/445/6482/10699/27163/4311/6252/38/5161/5007/5046/7132/64781/3949/2730/10166/1514/2475/1889/27293/51102/84618/5538/6487/25974/26027/256435/81849/3491/2946/2949/51107/29956/10654/1942/23385/4817/51022/5972/148811/84976/8560/5664/56605/2271/5…
MF	GO:0033218	amide binding	95	0.25098	1.78794	0.00742788	0.0403285	0.0284123	2866	tags=55%	list=38%	signal=34%	26119/911/149233/9452/1191/4820/8685/177/712/2352/2947/3339/910/81793/335/2213/3624/117/285755/972/5745/30061/590/9536/2289/6716/38/8435/23542/2892/552/146722/3949/7097/322/80772/22883/26232/1889/2048/3061/58512/25974/7804/2946/4881/912/909/913/6646/84320/5321
BP	GO:0048010	vascular endothelial growth factor receptor signaling pathway	48	0.311409	1.83365	0.0074774	0.0405539	0.0285711	2297	tags=54%	list=31%	signal=38%	2261/79652/2321/3791/4921/238/2887/7448/3815/2050/7010/7423/2254/5156/28514/5159/6091/2534/2041/3315/4914/1969/2046/2048/284656/7075
BP	GO:0050922	negative regulation of chemotaxis	21	0.456736	2.03487	0.00755769	0.0408702	0.028794	1500	tags=52%	list=20%	signal=42%	11240/4681/1803/26228/26585/1991/10563/7057/6347/9037/6091
MF	GO:0140272	exogenous protein binding	21	0.456523	2.03392	0.00755769	0.0408702	0.028794	978	tags=43%	list=13%	signal=37%	1803/1380/6504/81607/8764/1604/1378/920/983
BP	GO:0006650	glycerophospholipid metabolic process	112	0.235988	1.73806	0.0075599	0.0408702	0.028794	888	tags=21%	list=12%	signal=19%	204962/5320/129642/5920/126969/26751/3613/824/84879/253558/3990/23175/8503/79888/5337/284486/8394/55650/57217/80821/335/55361/337/114884
MF	GO:0001540	amyloid-beta binding	37	0.351726	1.92515	0.00762665	0.0411261	0.0289743	2362	tags=57%	list=31%	signal=39%	26119/9452/1191/8685/177/712/3339/335/2213/972/590/23542/2892/3949/7097/322/22883/26232/2048/58512/7804
BP	GO:0060419	heart growth	32	0.367074	1.91435	0.00763104	0.0411261	0.0289743	1608	tags=47%	list=21%	signal=37%	1901/7049/221476/7161/5600/9241/9868/5950/983/3479/2254/7472/5997/4086/2627
CC	GO:0030133	transport vesicle	157	0.220297	1.74499	0.00763156	0.0411261	0.0289743	2583	tags=46%	list=34%	signal=31%	7039/2261/84079/1731/6571/1183/3119/3115/3118/274/3117/155066/3122/6272/5861/9627/11311/284697/1604/90342/127124/8291/284612/23095/23400/81615/1669/3120/1359/3479/762/81611/140679/374/3127/3113/4884/972/5553/30061/116843/4311/29106/6833/3135/1184/10890/162/1861/10802/84937/11014/490/5872/535/11315/7780/84958/23673/4985/7805/113451/5538/6536/5865/5142/388662/5016/10717/148281/4803/9900/51107
BP	GO:2001233	regulation of apoptotic signaling pathway	131	0.232125	1.76979	0.00766477	0.0412174	0.0290386	1866	tags=39%	list=25%	signal=30%	960/1191/219790/183/1687/3574/51330/3552/57007/3932/2140/9451/57448/3162/8575/7015/9241/959/4318/2213/2266/3958/3624/6423/3479/51384/5366/8876/80237/57630/972/7057/1075/6387/652/54700/637/64114/64798/23542/2534/467/55179/51741/3070/4487/2537/3315/3655/596/2730
BP	GO:0006869	lipid transport	164	0.215075	1.71023	0.00766252	0.0412174	0.0290386	2207	tags=41%	list=29%	signal=29%	26119/5320/225/79895/344/154664/1191/26207/183/29881/3552/2172/51738/5443/84879/57198/3990/55187/6513/57540/9890/51542/23120/335/337/114884/6696/160518/5244/2167/5950/3624/9388/28965/350/6579/208/89874/11309/7057/4923/151176/9536/1066/51083/5007/63982/8647/8435/27183/301/341/10802/3949/3783/153768/196527/338/80772/30814/26279/64600/391013/8431/23673/55113/2170
BP	GO:0005976	polysaccharide metabolic process	40	0.335547	1.8722	0.00768126	0.0412623	0.0290702	1098	tags=32%	list=15%	signal=28%	1118/8972/80183/5443/55276/34/56270/83931/3953/2887/3479/208/79660
BP	GO:0051492	regulation of stress fiber assembly	37	0.351036	1.92137	0.00771381	0.0413933	0.0291625	2164	tags=54%	list=29%	signal=39%	1901/4771/10395/11346/9639/4070/8195/335/5345/7082/28984/7168/5217/2041/5734/123016/2475/55160/55616/3925
BP	GO:0050858	negative regulation of antigen receptor-mediated signaling pathway	22	0.423462	1.90265	0.00774782	0.0415319	0.0292602	957	tags=41%	list=13%	signal=36%	53347/4068/9404/115352/11126/2213/933/971/3958
BP	GO:1903170	negative regulation of calcium ion transmembrane transport	11	0.554125	1.89946	0.00778862	0.0417065	0.0293832	1820	tags=73%	list=24%	signal=55%	274/7531/845/55013/4923/5533/5532/596
BP	GO:0034694	response to prostaglandin	16	0.479912	1.92567	0.00781182	0.041754	0.0294166	936	tags=44%	list=12%	signal=38%	1236/5581/7049/5732/7292/5031/2
BP	GO:0031069	hair follicle morphogenesis	13	0.51398	1.90056	0.00781681	0.041754	0.0294166	1820	tags=69%	list=24%	signal=53%	2736/92344/1823/10468/3872/25928/2252/94234/596
BP	GO:0022411	cellular component disassembly	170	0.213145	1.70232	0.00782219	0.041754	0.0294166	1081	tags=24%	list=14%	signal=21%	88/1803/91782/146909/4317/7153/80183/712/26586/54541/9829/6711/11004/1939/5192/23175/65094/10154/1639/10269/4921/51542/440738/58511/53918/1991/1511/4318/2934/23075/4320/7177/22943/983/713/22974/81624/8867/2150/89927/144165
BP	GO:0120035	regulation of plasma membrane bounded cell projection organization	244	0.189506	1.60476	0.00787809	0.0420082	0.0295957	2148	tags=38%	list=29%	signal=28%	84628/84079/960/23500/1236/2625/26228/53335/9760/54443/5792/7025/5176/10178/26751/688/9378/11178/84879/23499/57463/10806/4070/10507/5337/10154/29116/26052/1996/6900/9860/57142/4921/238/1855/57498/2213/6696/170690/22943/6423/2150/3815/23413/23316/1268/100506658/7429/5365/4192/6387/5997/9037/115703/8507/57520/5217/5584/6091/8976/4086/5357/2534/482/9175/90410/23613/7074/3601/2033/3655/2146/84299/261…
BP	GO:0007051	spindle organization	93	0.248689	1.76222	0.00800344	0.042587	0.0300035	703	tags=19%	list=9%	signal=18%	259266/55125/1731/91782/57405/9787/7272/4751/332/9493/6905/10540/79000/9639/84722/1104/1639/114327
BP	GO:0007267	cell-cell signaling	439	0.169915	1.51226	0.00799607	0.042587	0.0300035	1580	tags=28%	list=21%	signal=23%	79368/777/2261/4068/55423/23504/84628/6571/2625/1269/817/140/8564/183/26585/2069/177/712/3574/5581/3552/79971/2703/51738/5443/6361/946/9378/11178/5208/9699/5861/8425/9627/7022/65220/90342/845/3814/6900/8291/84966/57142/3352/9890/23095/5590/51542/388581/1855/9241/18/1385/3779/640/6696/2556/2266/11247/27445/5026/6362/10563/5950/3624/8000/6374/22943/1081/29923/6423/116/3976/6664/6367/1908/5368/8867/…
BP	GO:0071621	granulocyte chemotaxis	47	0.33661	1.96663	0.00802075	0.0426344	0.0300369	1580	tags=45%	list=21%	signal=36%	3680/1803/1236/3576/57402/6504/1907/10563/3958/6374/6367/1908/5197/972/7057/6347/4192/3579/5919/4283/301
CC	GO:0005929	cilium	234	0.198908	1.67238	0.00803621	0.0426718	0.0300633	3417	tags=59%	list=46%	signal=33%	79762/1043/8556/204/1183/192668/9249/23035/2947/583/1063/261734/10806/84058/200162/84173/80705/2780/22920/1639/30845/2736/84217/114327/92749/151011/85452/8195/93594/23059/54585/7289/9389/84329/64399/284076/1738/199223/5190/57562/201625/8632/5575/219621/5742/5156/3754/7283/55567/9576/301/10890/6652/118491/56683/2737/6094/55764/123016/85302/90410/8573/23322/2782/200894/57096/3320/54587/49856/9731/8…
BP	GO:0045445	myoblast differentiation	35	0.353889	1.89283	0.00805797	0.042698	0.0300817	2190	tags=54%	list=29%	signal=39%	57492/26585/8110/6382/3399/2034/5339/4656/3479/25928/144165/5307/652/28514/4283/6604/6659/8289/55113
BP	GO:0071229	cellular response to acid chemical	35	0.353204	1.88917	0.00805797	0.042698	0.0300817	2267	tags=57%	list=30%	signal=40%	80310/53335/824/57463/5339/10542/1288/4314/445/5156/1051/6935/2534/552/2033/2730/2475/83667/1307/64121
BP	GO:0050798	activated T cell proliferation	16	0.477532	1.91612	0.00811035	0.0428443	0.0301848	1686	tags=56%	list=22%	signal=44%	149233/100133941/56253/177/6504/3485/3479/2534/126259
BP	GO:0046473	phosphatidic acid metabolic process	13	0.513094	1.89728	0.00811939	0.0428443	0.0301848	539	tags=38%	list=7%	signal=36%	5320/253558/23175/79888/5337
BP	GO:0043691	reverse cholesterol transport	11	0.552663	1.89445	0.00810225	0.0428443	0.0301848	1386	tags=64%	list=18%	signal=52%	344/1191/3990/335/337/9388/1066
BP	GO:0031647	regulation of protein stability	123	0.234821	1.76424	0.00811411	0.0428443	0.0301848	2797	tags=54%	list=37%	signal=34%	9334/7018/1191/4771/55278/27042/22848/89781/7203/51100/8575/29116/57142/7015/1855/51339/1385/2934/335/1370/3479/338328/208/173/8287/9026/972/5190/9770/5217/285282/10211/8774/482/6048/64854/5347/4487/84749/2033/11274/10474/596/6659/3320/8863/11315/2475/23352/23252/65018/1650/84196/23673/64175/23358/7398/23032/6125/1942/4000/112770/149628/5824/336/481
MF	GO:0072341	modified amino acid binding	38	0.354595	1.95089	0.0081698	0.0430656	0.0303406	2597	tags=63%	list=35%	signal=42%	306/728113/2352/2947/84069/307/114884/4594/875/7057/9536/8436/4311/301/653145/8904/146722/57158/115548/4524/25974/6121/2946/8416
BP	GO:0007093	mitotic cell cycle checkpoint signaling	64	0.292455	1.87952	0.0081847	0.0430851	0.0303544	645	tags=22%	list=9%	signal=20%	699/6419/55159/57405/7272/332/11130/63967/4998/1063/51514/348654/595/25949
BP	GO:0033627	cell adhesion mediated by integrin	40	0.33438	1.86569	0.0081905	0.0430851	0.0303544	1010	tags=32%	list=13%	signal=28%	2200/3680/1803/9404/1545/8515/916/8631/23075/7448/10563/6423/3976
MF	GO:0030159	signaling receptor complex adaptor activity	22	0.422156	1.89678	0.00822314	0.043212	0.0304438	873	tags=36%	list=12%	signal=32%	26119/50852/26228/6464/917/916/2887/29760
CC	GO:0043025	neuronal cell body	178	0.212568	1.71492	0.0082527	0.0433224	0.0305216	3200	tags=56%	list=43%	signal=33%	777/10642/57125/1269/306/57565/5792/57699/5176/958/11346/9378/824/57463/9627/1996/1639/3814/6900/57142/57657/1261/114327/5590/23400/1855/374291/23585/55361/933/116/22974/5368/10381/3759/28988/9026/283/4923/2674/445/114757/8516/8507/4311/6252/51083/3337/6716/4129/23542/2534/22866/30009/23426/7074/1233/3783/3320/4914/338/339451/4878/7133/5909/2048/113451/2899/5538/4352/148930/7804/5563/257194/23032…
CC	GO:0035578	azurophil granule lumen	30	0.353143	1.78233	0.0082656	0.0433452	0.0305377	2791	tags=67%	list=37%	signal=42%	11240/4353/1991/1511/7276/12/5005/1075/23593/5657/671/4069/55313/51316/23197/2517/10487/388697/6278/8804
BP	GO:0048009	insulin-like growth factor receptor signaling pathway	40	0.333926	1.86315	0.00827538	0.0433517	0.0305422	2297	tags=55%	list=31%	signal=38%	2261/2321/9451/3791/4921/6464/238/2887/3485/3479/3815/2050/7010/5156/5159/2041/4914/1969/2046/2048/284656/7075
BP	GO:0060562	epithelial tube morphogenesis	116	0.235611	1.75553	0.00829436	0.0434063	0.0305807	2584	tags=51%	list=34%	signal=34%	51176/2625/183/26585/65979/10395/3791/4070/157506/2736/1855/8195/9241/26249/23059/7289/5613/9620/170690/6423/64399/64478/25928/374/144165/2022/4192/3579/133/5076/6943/10252/7472/652/28514/7291/1739/2737/55764/596/200894/10370/6497/388585/388591/5293/4524/1969/7798/57822/7075/6491/8915/11146/1435/64783/7482/4853/79630
BP	GO:0097305	response to alcohol	93	0.247587	1.75441	0.0083204	0.0434977	0.0306451	2486	tags=49%	list=33%	signal=34%	939/1236/2625/1545/1036/5581/7049/978/5732/7292/5031/9563/18/1385/3779/5888/2/3624/983/117/8061/1268/57630/5997/1066/2289/6340/4129/8647/847/2534/5734/552/64854/2782/80854/4615/51150/6339/8431/4985/55929/7804/5563/5737/7412
MF	GO:0004857	enzyme inhibitor activity	143	0.219477	1.69764	0.00833708	0.04354	0.0306749	1683	tags=34%	list=22%	signal=27%	9806/6815/344/5265/306/332/183/274/5176/462/3699/28951/54920/10628/57448/8434/221476/307/4660/3698/5345/3827/3485/2/12/710/3958/2810/153769/81611/197/3700/3730/221692/7057/7076/5575/8530/58189/5997/57650/6050/64798/1472/301/1475/11113/9232/341
BP	GO:0031623	receptor internalization	42	0.334028	1.89907	0.00835073	0.0435664	0.0306935	630	tags=24%	list=8%	signal=22%	26119/55061/6401/26585/3576/57007/2060/84058/26052/6900
BP	GO:0003018	vascular process in circulatory system	100	0.23931	1.72344	0.00840763	0.0437993	0.0308575	1648	tags=37%	list=22%	signal=29%	3680/183/177/143872/583/84879/5339/6513/1907/3953/3352/8195/3779/3043/5345/3827/2266/1311/1908/2150/7082/6565/100506658/875/11309/7010/3579/133/5029/5997/79987/57419/23428/6833/2030/482/552
CC	GO:0005925	focal adhesion	152	0.217081	1.70565	0.00841263	0.0437993	0.0308575	1868	tags=34%	list=25%	signal=26%	9173/88/2261/1803/960/4008/9404/9493/2321/10395/2273/58504/3716/8462/824/58497/1266/5339/7531/3339/30845/23114/4921/8394/6464/57514/2934/5244/55740/83543/7010/2022/85464/1000/8516/4311/2535/1012/8994/5159/10211/847/301/10890/4810/3603/8573/3315/5094/3655/29843/5786
BP	GO:2000402	negative regulation of lymphocyte migration	12	0.502286	1.79541	0.00845635	0.0439366	0.0309543	1878	tags=67%	list=25%	signal=50%	11240/257144/131450/84830/6347/8976/9466/23143
BP	GO:1901071	glucosamine-containing compound metabolic process	12	0.501882	1.79396	0.00845635	0.0439366	0.0309543	2521	tags=75%	list=34%	signal=50%	1118/1117/9469/1116/4248/1486/2135/27159/5016
CC	GO:0035579	specific granule membrane	32	0.364328	1.90003	0.00852355	0.0442404	0.0311684	1295	tags=41%	list=17%	signal=34%	57126/79895/963/5337/8514/6518/932/1088/84329/53831/4973/353189/2040
BP	GO:1901655	cellular response to ketone	39	0.355575	1.99447	0.00857577	0.0443972	0.0312788	2055	tags=51%	list=27%	signal=37%	1545/54541/5581/5176/5732/7292/842/5031/64754/51542/1385/6696/10631/445/1977/6340/5734/2782/6339/11315
MF	GO:0019903	protein phosphatase binding	49	0.324749	1.92899	0.00856604	0.0443972	0.0312788	1966	tags=47%	list=26%	signal=35%	79368/4751/65979/3932/3716/9451/7531/22920/23381/55917/8631/6774/933/3958/153769/79660/1000/25827/5532/3783/596/29110/3320
BP	GO:0140053	mitochondrial gene expression	56	0.294061	1.81466	0.00858001	0.0443972	0.0312788	3829	tags=77%	list=51%	signal=38%	55278/51106/84172/10352/79590/87178/54802/130916/57038/9553/55173/54998/55052/64960/51253/54460/80222/65005/7818/55157/90806/55699/128308/64216/55006/10128/4528/116540/9801/25885/55037/51318/64969/55683/51263/64965/9238/708/63875/84881/5188/122704/85476
BP	GO:0043372	positive regulation of CD4-positive alpha-beta T cell differentiation	16	0.474067	1.90221	0.00860791	0.0444962	0.0313485	719	tags=38%	list=10%	signal=34%	149233/9308/3142/3122/7292/5590
BP	GO:0034367	protein-containing complex remodeling	21	0.4523	2.0151	0.00869846	0.0449184	0.031646	1013	tags=43%	list=13%	signal=37%	5320/4353/344/183/3990/335/337/9388/81624
BP	GO:0008217	regulation of blood pressure	68	0.284875	1.86255	0.00871902	0.0449788	0.0316886	2191	tags=51%	list=29%	signal=37%	183/143872/5443/1907/6518/8195/18/1511/3043/5345/1359/170690/10631/1908/2150/3816/1268/2022/4923/133/5742/28514/10699/7168/8509/6340/552/490/6339/10911/57085/4878/4879/1889/5724
BP	GO:0034331	cell junction maintenance	24	0.422611	1.96378	0.00873773	0.0450295	0.0317243	2894	tags=75%	list=39%	signal=46%	57126/6272/9699/1639/1823/27445/2150/144165/7082/91584/1739/5657/51150/114784/9783/55243/55765/5317
BP	GO:0051607	defense response to virus	114	0.236633	1.75885	0.00876854	0.0451424	0.0318038	2454	tags=46%	list=33%	signal=32%	149233/163702/3434/51257/54541/91543/9636/10623/958/54920/10964/2635/6675/6041/8575/5551/100507436/4343/10269/9868/51297/9582/2150/5366/10417/7728/4599/1665/4283/7098/6773/8519/2537/11274/3429/5094/596/3437/7097/4615/29110/115004/200316/3320/55210/8547/80149/84871/7268/2633/2634/388646/115362
BP	GO:0006766	vitamin metabolic process	35	0.350709	1.87582	0.0088593	0.0455173	0.0320679	1316	tags=40%	list=18%	signal=33%	249/1593/29881/4837/157506/55229/6513/55163/29968/27010/1591/8876/9963/119391
MF	GO:0140789	histone phosphatase activity	50	0.303169	1.81727	0.00885508	0.0455173	0.0320679	1868	tags=44%	list=25%	signal=33%	8556/5792/23035/9829/995/7803/2140/5784/54935/5778/1033/5783/85464/147699/10106/1850/55313/5533/5796/80895/5532/5786
BP	GO:1902806	regulation of cell cycle G1/S phase transition	66	0.287084	1.86748	0.00888199	0.0455415	0.032085	1840	tags=41%	list=25%	signal=31%	6241/9928/55159/57492/8110/2273/605/8462/49860/595/4921/7015/51339/3624/1869/6347/9510/28984/1739/10106/637/301/6604/990/81610/596/2146
BP	GO:0031214	biomineral tissue development	66	0.286692	1.86493	0.00888199	0.0455415	0.032085	1496	tags=35%	list=20%	signal=28%	1901/9923/249/2261/26585/6574/79971/9636/9451/10269/4921/6696/1311/3479/197/144165/56975/2201/5745/652/7291/57419/1051
BP	GO:0051154	negative regulation of striated muscle cell differentiation	15	0.487093	1.89238	0.00896271	0.045909	0.0323439	1840	tags=67%	list=25%	signal=50%	79365/221476/9868/1048/22943/28514/5997/84814/4487/2146
BP	GO:0010638	positive regulation of organelle organization	181	0.213349	1.72469	0.0090007	0.046057	0.0324482	2135	tags=40%	list=28%	signal=29%	699/88/7039/940/1236/4771/9787/4751/2069/5581/3552/274/10178/23397/11346/9639/6382/7203/3791/84722/51100/57535/1639/80821/122060/4318/2934/335/5345/23075/983/220134/3479/1908/8867/2150/11065/5366/8739/100506658/9026/10810/7429/28984/9037/7168/1739/125476/5217/5159/5007/637/301/2041/9700/80856/23259/90410/84937/4487/5532/54892/7014/8881/9212/3320/123720/49856/2475/9696/55160/65018
BP	GO:0071902	positive regulation of protein serine/threonine kinase activity	31	0.363834	1.86494	0.00905668	0.0462502	0.0325843	1932	tags=52%	list=26%	signal=38%	100133941/10125/2321/10178/84722/595/1991/1908/7057/28984/57214/5159/6091/9175/2146/22924
BP	GO:0010976	positive regulation of neuron projection development	58	0.297592	1.85726	0.00904957	0.0462502	0.0325843	2415	tags=53%	list=32%	signal=37%	84079/53335/9760/5176/57463/1996/4921/238/1855/57498/23316/1268/5365/4192/5997/8507/5584/4086/2534/482/7074/2033/3655/2146/322/4914/2048/64175/7804/57554/257194
BP	GO:0001990	regulation of systemic arterial blood pressure by hormone	16	0.47071	1.88874	0.00920499	0.0469603	0.0330845	1648	tags=62%	list=22%	signal=49%	183/1907/1511/5345/1359/1908/2150/10699/8509/552
CC	GO:0030864	cortical actin cytoskeleton	32	0.361234	1.88389	0.00923843	0.0470835	0.0331714	1585	tags=44%	list=21%	signal=35%	88/4771/54443/10395/6711/824/6513/2934/100820829/9026/1000/8976/10211/5357
BP	GO:0060038	cardiac muscle cell proliferation	19	0.43722	1.87016	0.00938964	0.0477981	0.0336748	2028	tags=63%	list=27%	signal=46%	7049/7161/5600/9241/5950/983/2254/7472/4086/2627/10370/6497
CC	GO:0031966	mitochondrial membrane	224	0.196776	1.64431	0.00939749	0.0477981	0.0336748	4822	tags=80%	list=64%	signal=29%	5320/249/80342/113612/1191/8564/1593/284723/91543/4707/83858/5498/79590/23175/80775/84069/51100/34/5339/3162/7531/2820/94097/29957/57103/374291/6687/9868/55013/9389/55333/3958/1591/5366/1268/89874/2628/445/57038/9553/10981/55173/4129/637/197257/5250/6652/9551/23464/6048/246269/2537/84749/1349/4259/3429/596/100287932/10166/4891/60558/139322/79944/4724/29103/54998/55052/55210/55735/2475/9927/440567…
BP	GO:0008202	steroid metabolic process	111	0.235889	1.73414	0.00941862	0.0478575	0.0337167	3019	tags=57%	list=40%	signal=34%	26119/10901/6097/1545/1593/29881/3552/54206/3990/57540/9563/3953/9486/1385/174/335/337/6696/866/9023/3624/1081/10170/1591/7367/3815/133/5156/1066/59338/51083/30/6716/5007/10202/8647/8435/847/341/120227/3949/403313/10613/338/8431/114883/255738/5563/27329/2672/11218/476/3283/2330/10654/336/5087/6646/2494/51706/3930/64746/64801
MF	GO:0035591	signaling adaptor activity	55	0.303155	1.86228	0.00946571	0.0480268	0.033836	1933	tags=44%	list=26%	signal=33%	26119/79368/50852/26228/274/7188/7531/6464/917/916/6774/2887/29760/55024/57630/400581/55824/27040/23542/23426/79726/2782/4615/9043
BP	GO:0001916	positive regulation of T cell mediated cytotoxicity	14	0.482873	1.80983	0.00947088	0.0480268	0.033836	698	tags=36%	list=9%	signal=32%	911/149233/3122/3140/910
BP	GO:0048639	positive regulation of developmental growth	60	0.292011	1.84222	0.00948454	0.0480309	0.0338388	1660	tags=40%	list=22%	signal=31%	53335/3574/57699/7049/3142/51738/583/23499/9699/10507/8195/1385/983/3479/7429/2254/7472/6387/28514/9037/1735/5357/2627/9175
BP	GO:1901135	carbohydrate derivative metabolic process	350	0.176655	1.53937	0.00949062	0.0480309	0.0338388	4822	tags=77%	list=64%	signal=29%	1118/26289/1117/6241/204/9334/9452/2592/11320/960/7357/57134/1236/54541/93611/978/4837/3699/4707/129607/55276/140733/347736/5208/1806/84676/6675/5861/126792/55624/8654/8704/2820/79623/65220/9563/57103/55650/7844/80896/9486/374291/9469/168537/64841/1116/6774/55022/11226/3698/9957/83857/9956/3479/3700/10894/25825/79152/8706/4248/3815/1990/64116/7423/27115/6482/1739/8509/8993/57214/29906/5046/6569/6…
BP	GO:0050862	positive regulation of T cell receptor signaling pathway	10	0.543718	1.79461	0.00952573	0.0481125	0.0338963	389	tags=40%	list=5%	signal=38%	50852/9840/1236/3932
BP	GO:0042730	fibrinolysis	10	0.543498	1.79389	0.00952573	0.0481125	0.0338963	1444	tags=70%	list=19%	signal=57%	5345/7448/2266/710/350/7057/3818
BP	GO:1902903	regulation of supramolecular fiber organization	147	0.220208	1.71021	0.00955108	0.0481925	0.0339527	1463	tags=30%	list=19%	signal=25%	1901/88/23500/1236/1191/4771/163782/10395/26586/5581/274/6711/10178/11346/9639/84722/4070/58497/3339/1639/8195/122060/2934/335/5345/23075/220134/22974/81624/2150/89927/7082/100506658/9026/10810/7429/85464/6387/28984/9037/7168/1739/6050/5217
BP	GO:0070555	response to interleukin-1	42	0.330163	1.8771	0.00962742	0.0484968	0.0341671	916	tags=29%	list=12%	signal=25%	7850/6401/8564/3554/3576/8808/958/2635/84676/5600/1116/2266
BP	GO:0006974	DNA damage response	304	0.18694	1.61397	0.00964007	0.0484968	0.0341671	4258	tags=70%	list=57%	signal=32%	9923/6419/55159/960/1191/57492/7153/8110/199990/54541/27030/63967/57007/56950/605/79000/51514/140733/842/2140/51455/348654/595/150684/100507436/54936/84944/7161/245711/10269/2956/25949/23612/57103/1647/5888/2810/55247/983/6423/9768/6874/5366/80237/1869/972/6387/7291/2305/57650/125476/1396/6749/10538/5892/7132/637/3835/5425/9891/6604/9232/9319/7468/5347/23613/4487/10721/55215/5424/2033/4439/10474/…
BP	GO:0006082	organic acid metabolic process	327	0.178213	1.54705	0.00964007	0.0484968	0.0341671	3739	tags=61%	list=50%	signal=32%	4353/225/11320/344/113612/8564/1545/3034/1593/1036/54541/5723/26227/79814/1757/54206/3995/5208/1806/84879/4948/84676/84706/3990/23175/157506/55229/34/284486/55289/6513/127281/55256/58484/1573/1907/57103/80896/84842/18/55301/6774/337/29968/27010/4594/220/6999/3067/84830/9388/3479/10170/28965/208/1738/79152/8876/3815/1268/9963/89874/875/384/972/2628/64116/151176/219743/5742/119391/23743/445/9536/64…
BP	GO:0002088	lens development in camera-type eye	28	0.37415	1.82558	0.00966732	0.0485857	0.0342297	2665	tags=68%	list=35%	signal=44%	2625/4771/2703/6664/10252/7472/652/1415/1739/4810/128637/10370/6497/1969/2301/8412/7482/204851/90780
BP	GO:0002695	negative regulation of leukocyte activation	98	0.247689	1.77457	0.00971584	0.0487812	0.0343674	2933	tags=57%	list=39%	signal=35%	5320/56253/1269/3142/11326/54900/7292/8764/8654/100507436/1378/1511/55024/2213/3958/3624/6664/23495/1268/384/972/4192/8530/64115/55824/652/1739/51083/8993/221395/1051/3135/301/671/2737/146722/30009/3949/26279/64600/864/7805/80149/11146/284467/26191/79679/79626/114771/51043/23208/8832/387597/149041/5788/83593
MF	GO:0004721	phosphoprotein phosphatase activity	59	0.298786	1.86722	0.00973535	0.0488308	0.0344024	1868	tags=44%	list=25%	signal=33%	8556/5792/23035/9829/995/7803/3932/2140/5784/54935/5778/1033/79660/5783/85464/1739/147699/10106/1850/9989/55313/5533/5796/80895/5532/5786
BP	GO:0034368	protein-lipid complex remodeling	20	0.437564	1.90529	0.00978659	0.0489909	0.0345152	2129	tags=60%	list=28%	signal=43%	5320/4353/344/183/3990/335/337/9388/5046/341/338/30814
BP	GO:0034369	plasma lipoprotein particle remodeling	20	0.437564	1.90529	0.00978659	0.0489909	0.0345152	2129	tags=60%	list=28%	signal=43%	5320/4353/344/183/3990/335/337/9388/5046/341/338/30814
BP	GO:0052547	regulation of peptidase activity	36	0.343845	1.86079	0.00981474	0.0490443	0.0345528	1595	tags=44%	list=21%	signal=35%	9806/177/274/5176/8434/1378/23400/6774/5345/7448/710/7076/8530/64115/653145/1475
BP	GO:0034762	regulation of transmembrane transport	167	0.209414	1.66938	0.00981659	0.0490443	0.0345528	1843	tags=37%	list=25%	signal=28%	88/817/55600/183/5581/274/2273/3772/57463/6041/150684/5031/7531/845/8514/7015/55917/388581/6687/55013/4318/2887/3779/55022/931/930/5026/51297/3479/117/3773/1908/208/3759/100506658/7057/6347/4923/151176/2040/7225/5997/1739/7402/51083/57214/5584/967/6569/4283/10768/23542/2534/482/5533/5532/3783/596/1612/29843/57158
BP	GO:0001942	hair follicle development	31	0.359125	1.8408	0.00987127	0.0492689	0.034711	1441	tags=45%	list=19%	signal=37%	10913/91/10269/2736/92344/1823/10468/3624/22943/3872/25928/2252/94234/51083
BP	GO:0007611	learning or memory	86	0.260112	1.81552	0.00994734	0.0495511	0.0349098	2001	tags=45%	list=27%	signal=34%	177/5176/9378/8704/1996/6900/431707/5590/9486/9241/1385/22943/64478/8867/8061/3815/23316/1268/2628/4192/4923/5575/22829/590/8516/4311/6833/23542/2534/814/23259/90410/5532/2033/3949/7097/4891/729956/4914
BP	GO:0002923	regulation of humoral immune response mediated by circulating immunoglobulin	10	0.541015	1.78569	0.00994215	0.0495511	0.0349098	2942	tags=90%	list=39%	signal=55%	55061/1380/1378/2213/3263/5788/722/1379/4179
BP	GO:0071827	plasma lipoprotein particle organization	24	0.419475	1.9492	0.00996759	0.0496032	0.0349465	2129	tags=58%	list=28%	signal=42%	5320/4353/344/183/84879/3990/335/337/9388/5046/8435/341/338/30814
MF	GO:0001217	DNA-binding transcription repressor activity	100	0.236405	1.70252	0.0099791	0.0496118	0.0349526	2954	tags=56%	list=39%	signal=34%	51176/2625/6097/3725/53335/7025/79365/639/7022/7799/7709/63976/7227/6932/7644/124535/11279/23316/79733/6943/2114/94234/7291/1602/7728/1051/3235/6935/467/55502/30009/4487/7753/155061/57158/9880/11278/148398/6497/388585/54626/653121/26508/127343/200014/27022/2672/6913/51043/3068/5396/84614/23528/100381270/9580/55509
BP	GO:0048469	cell maturation	62	0.29344	1.87071	0.0100556	0.0498944	0.0351517	3070	tags=63%	list=41%	signal=37%	9928/9334/2625/53335/2069/712/3791/2034/6900/9389/2266/5026/81624/1738/3021/283/56975/5745/342035/9175/9319/596/675/375790/388585/2046/378807/51441/6886/23318/11022/84283/4653/163589/5972/440712/28982/257044/25893
BP	GO:0015669	gas transport	10	0.538992	1.77901	0.0100463	0.0498944	0.0351517	1375	tags=60%	list=18%	signal=49%	3047/3048/3043/3039/3050/114757
BP	GO:0046326	positive regulation of D-glucose import	16	0.467405	1.87548	0.0101006	0.0500686	0.0352744	1468	tags=56%	list=20%	signal=45%	55600/6041/7015/388581/3479/208/100506658/151176/5584
BP	GO:1901343	negative regulation of vasculature development	44	0.317132	1.83191	0.0101156	0.0500937	0.0352921	3148	tags=68%	list=42%	signal=40%	5176/51738/3339/6464/11126/576/1647/55333/350/7057/7010/9510/28984/6833/3135/2534/10218/4879/1969/1870/7075/4881/1944/64218/128240/356/26254/493/9475/11117
BP	GO:0032637	interleukin-8 production	40	0.331175	1.8478	0.0101502	0.0501193	0.0353101	2882	tags=65%	list=38%	signal=40%	914/7100/5861/307/10542/1116/1991/6774/2150/972/820/7098/301/671/7097/4615/11315/8915/2152/26191/56957/3570/1401/51744/336/5788
BP	GO:0032677	regulation of interleukin-8 production	40	0.331175	1.8478	0.0101502	0.0501193	0.0353101	2882	tags=65%	list=38%	signal=40%	914/7100/5861/307/10542/1116/1991/6774/2150/972/820/7098/301/671/7097/4615/11315/8915/2152/26191/56957/3570/1401/51744/336/5788
BP	GO:0021544	subpallium development	10	0.53722	1.77316	0.0101504	0.0501193	0.0353101	1858	tags=70%	list=25%	signal=53%	64919/583/8195/220/3624/2737/3251
BP	GO:0060041	retina development in camera-type eye	63	0.284355	1.82328	0.0102191	0.0504097	0.0355148	2028	tags=44%	list=27%	signal=33%	4774/1545/5176/261734/639/84879/7068/79888/2780/130557/343472/256297/6774/5950/5076/5156/28514/23554/5159/1735/6094/123016/6604/23322/2782/57096/148398/6497
BP	GO:0043534	blood vessel endothelial cell migration	40	0.330625	1.84473	0.0103207	0.0507628	0.0357635	1580	tags=42%	list=21%	signal=34%	26585/1545/7049/958/9734/3791/8503/3162/1647/10000/335/84830/2050/7057/28984/6091/301
CC	GO:0010008	endosome membrane	214	0.199412	1.65346	0.0103204	0.0507628	0.0357635	1582	tags=30%	list=21%	signal=24%	911/91782/7018/1183/3119/3115/51257/3118/255231/9214/79971/3117/3111/245972/155066/3122/2060/6272/4948/3140/11311/55016/57535/5337/150684/30845/10269/10542/910/23400/23120/81615/64841/7782/55361/23062/83891/4430/3120/26872/22943/81624/81611/3127/56937/30846/3108/3112/3113/120224/285195/27065/967/29919/3135/64114/7098/1735/8647/1184/27183/301/10890/653145
BP	GO:0051640	organelle localization	216	0.196186	1.62883	0.0103204	0.0507628	0.0357635	759	tags=16%	list=10%	signal=15%	259266/1058/9928/10125/55153/1731/91782/6571/57405/9787/7272/4751/2205/332/11130/274/583/10540/1063/11004/9378/6382/84722/9699/5861/284697/245711/26052/22920/1639/51112/23095/5590/23400/8195
BP	GO:0031032	actomyosin structure organization	92	0.249453	1.76484	0.0103696	0.0509046	0.0358634	2197	tags=43%	list=29%	signal=31%	128239/1901/88/4771/54443/10395/80206/11346/9639/4070/1266/5339/9578/4703/8195/335/5345/7082/4606/221692/28984/5156/7168/5217/5159/27183/2041/5734/123016/29127/10529/7273/4629/2475/55160/7798/55616/127294/3925/2035
BP	GO:0070482	response to oxygen levels	129	0.231364	1.757	0.0103681	0.0509046	0.0358634	2081	tags=42%	list=28%	signal=31%	100133941/1803/177/54541/5581/7049/3552/842/824/2034/84069/3339/6513/57142/4921/57103/7015/50809/18/3779/3624/29923/10631/3976/5366/875/7057/7010/2022/7423/283/133/6387/28984/7291/114757/890/8994/1735/2030/847/2627/2033/596/7097/4891/6659/10370/360/1179/2475/57085/4524/5351
CC	GO:0048471	perinuclear region of cytoplasm	258	0.185121	1.57475	0.0103977	0.0509932	0.0359258	1015	tags=19%	list=14%	signal=17%	25780/5320/7039/10642/9404/7018/1191/4771/6401/5581/10207/5176/57402/995/10178/540/1063/2635/824/6272/7159/9451/81493/5586/5337/5339/3162/8575/84944/57449/26052/30845/307/79654/51112/5590/51542/57572/1116/932/10562/11226/55024/6696/5888/4430/3624/9768/1033/762
BP	GO:1901991	negative regulation of mitotic cell cycle phase transition	81	0.261613	1.79113	0.0104918	0.0514046	0.0362157	2083	tags=43%	list=28%	signal=32%	699/55159/57405/7272/332/11130/63967/2273/4998/1063/51514/348654/595/25949/51339/3624/983/220134/9088/55143/6347/28984/1739/10106/27183/9319/990/5347/596/2146/701/9212/29980/10459/60672
BP	GO:0002707	negative regulation of lymphocyte mediated immunity	29	0.373043	1.85915	0.0105552	0.0515837	0.0363419	881	tags=31%	list=12%	signal=27%	55061/10225/3575/1380/6504/81607/100507436/1378/2213
BP	GO:0008154	actin polymerization or depolymerization	71	0.275162	1.80812	0.0105577	0.0515837	0.0363419	1502	tags=37%	list=20%	signal=30%	88/23500/1236/163782/5581/274/6711/51738/10178/8195/2934/23075/81624/2150/55740/57553/9026/10810/7429/283/85464/6387/9037/1739/5217/8976
MF	GO:0035401	histone H3Y41 kinase activity	56	0.290871	1.79498	0.0105792	0.0515837	0.0363419	2319	tags=50%	list=31%	signal=35%	2261/3702/7272/2321/3932/3716/9451/3791/4921/238/640/55872/3815/2050/7010/5156/5159/2534/2041/8445/4145/4914/1969/2046/2048/284656/7075/10420
MF	GO:0140801	histone H2AXY142 kinase activity	56	0.290871	1.79498	0.0105792	0.0515837	0.0363419	2319	tags=50%	list=31%	signal=35%	2261/3702/7272/2321/3932/3716/9451/3791/4921/238/640/55872/3815/2050/7010/5156/5159/2534/2041/8445/4145/4914/1969/2046/2048/284656/7075/10420
BP	GO:0045940	positive regulation of steroid metabolic process	10	0.536373	1.77037	0.0105668	0.0515837	0.0363419	1386	tags=60%	list=18%	signal=49%	26119/3552/335/1081/133/1066
MF	GO:0042379	chemokine receptor binding	23	0.396564	1.81679	0.0106044	0.0516571	0.0363936	1534	tags=52%	list=20%	signal=42%	3576/57402/3716/6362/10563/6374/6367/5197/6368/6347/6387/4283
BP	GO:0032733	positive regulation of interleukin-10 production	19	0.431129	1.8441	0.0106584	0.0518204	0.0365086	1054	tags=42%	list=14%	signal=36%	940/9308/9636/7292/5590/959/6774/2150
BP	GO:0030866	cortical actin cytoskeleton organization	19	0.430826	1.84281	0.0106584	0.0518204	0.0365086	1863	tags=58%	list=25%	signal=44%	128239/54443/80206/5339/30846/7429/1739/27183/5357/29127/5872
BP	GO:0046718	symbiont entry into host cell	37	0.344787	1.88717	0.0107739	0.0523318	0.0368689	978	tags=32%	list=13%	signal=28%	1803/1380/6614/6504/2060/81607/8764/1604/1378/920/9023/983
BP	GO:0021695	cerebellar cortex development	14	0.478796	1.79455	0.0108039	0.0524275	0.0369363	1363	tags=50%	list=18%	signal=41%	9928/9378/8704/2736/473/4192/28514
CC	GO:0097386	glial cell projection	11	0.539477	1.84925	0.0108214	0.0524622	0.0369608	3464	tags=100%	list=46%	signal=54%	1261/23585/10810/2534/482/65018/3766/55811/23432/23418/57471
BP	GO:0043436	oxoacid metabolic process	325	0.178834	1.55157	0.0108466	0.0525338	0.0370112	1553	tags=29%	list=21%	signal=24%	4353/225/11320/344/113612/8564/1545/3034/1593/1036/54541/5723/26227/79814/1757/54206/3995/5208/1806/84879/4948/84676/84706/3990/23175/157506/55229/34/284486/55289/6513/127281/55256/58484/1573/1907/57103/80896/84842/18/55301/6774/337/29968/27010/4594/220/6999/3067/84830/9388/3479/10170/28965/208/1738/79152/8876/3815/1268/9963/89874/875/384/972/2628/64116/151176/219743/5742/119391/23743/445/9536/64…
BP	GO:0042092	type 2 immune response	22	0.413013	1.8557	0.0109866	0.0531117	0.0374183	1823	tags=55%	list=24%	signal=41%	2625/2205/91543/3142/7292/5590/384/972/10538/301/30009/9466
BP	GO:0051090	regulation of DNA-binding transcription factor activity	112	0.228787	1.68503	0.0109868	0.0531117	0.0374183	719	tags=19%	list=10%	signal=17%	1191/306/219790/8809/140/183/177/1545/4919/7188/8807/7292/49860/3399/150684/58484/307/10542/4921/238/5590
BP	GO:0005978	glycogen biosynthetic process	12	0.48982	1.75085	0.0110934	0.0534741	0.0376737	1847	tags=67%	list=25%	signal=50%	55276/34/2887/3479/208/79660/8908/8445
BP	GO:0009250	glucan biosynthetic process	12	0.48982	1.75085	0.0110934	0.0534741	0.0376737	1847	tags=67%	list=25%	signal=50%	55276/34/2887/3479/208/79660/8908/8445
BP	GO:0034383	low-density lipoprotein particle clearance	12	0.488449	1.74595	0.0110934	0.0534741	0.0376737	2935	tags=83%	list=39%	signal=51%	26119/3162/29116/6833/8435/3949/338/255738/6646/29949
BP	GO:1903522	regulation of blood circulation	92	0.247467	1.75079	0.0111612	0.0537498	0.0378679	658	tags=20%	list=9%	signal=18%	3680/817/140/183/177/143872/274/51738/7068/1832/2034/8654/7531/30845/845/10269/1573/1907
BP	GO:0048145	regulation of fibroblast proliferation	33	0.354779	1.87112	0.0112251	0.0539549	0.0380124	1406	tags=42%	list=19%	signal=35%	80310/183/2069/2192/10269/4921/3479/3976/1869/972/7472/5156/1602/890
BP	GO:2000008	regulation of protein localization to cell surface	14	0.476357	1.78541	0.0112155	0.0539549	0.0380124	639	tags=36%	list=9%	signal=33%	88/919/150684/8514/9860
BP	GO:0050731	positive regulation of peptidyl-tyrosine phosphorylation	48	0.302239	1.77965	0.0112928	0.0541775	0.0381692	1362	tags=38%	list=18%	signal=31%	7039/2261/26585/10507/8784/916/920/55024/7448/3479/3976/374/3815/285489/7423/2252/2674/4254
BP	GO:0019752	carboxylic acid metabolic process	318	0.180805	1.56571	0.0112841	0.0541775	0.0381692	1553	tags=29%	list=21%	signal=24%	225/11320/344/113612/8564/1545/3034/1593/1036/54541/5723/26227/79814/1757/54206/3995/5208/1806/84879/4948/84676/84706/3990/23175/157506/55229/34/284486/55289/6513/127281/55256/58484/1573/1907/57103/80896/84842/18/55301/6774/337/29968/27010/4594/220/6999/3067/84830/9388/3479/10170/28965/208/1738/79152/8876/3815/1268/9963/89874/875/384/972/2628/64116/151176/219743/5742/119391/23743/445/9536/6482/72…
BP	GO:0051180	vitamin transport	21	0.439077	1.95619	0.0113687	0.0544902	0.0383896	1183	tags=48%	list=16%	signal=40%	2352/29881/148641/6513/6518/6947/9389/335/173/9963
BP	GO:0001889	liver development	39	0.345422	1.93752	0.0114626	0.0547333	0.0385608	1946	tags=49%	list=26%	signal=36%	7039/7049/3142/54206/87178/595/34/10269/57142/7448/4192/79733/445/38/1051/2627/23322/2146/10370
BP	GO:0061008	hepaticobiliary system development	39	0.345422	1.93752	0.0114626	0.0547333	0.0385608	1946	tags=49%	list=26%	signal=36%	7039/7049/3142/54206/87178/595/34/10269/57142/7448/4192/79733/445/38/1051/2627/23322/2146/10370
BP	GO:0061744	motor behavior	11	0.537272	1.84169	0.0114518	0.0547333	0.0385608	723	tags=45%	list=10%	signal=41%	1803/605/84879/1639/51542
MF	GO:0080025	phosphatidylinositol-3 5-bisphosphate binding	11	0.537036	1.84088	0.0114518	0.0547333	0.0385608	1192	tags=55%	list=16%	signal=46%	54477/150684/56270/23612/23400/9026
BP	GO:0022037	metencephalon development	37	0.342693	1.87571	0.0114746	0.0547392	0.038565	1840	tags=46%	list=25%	signal=35%	9928/9378/8704/2662/8648/2736/473/256297/916/18/2213/875/4192/28514/596/23322/2146
BP	GO:0009218	pyrimidine ribonucleotide metabolic process	12	0.486984	1.74071	0.0115005	0.0548112	0.0386157	433	tags=33%	list=6%	signal=31%	26289/978/347736/1806
BP	GO:0051873	killing by host of symbiont cells	10	0.533475	1.7608	0.011613	0.0552952	0.0389567	2876	tags=90%	list=38%	signal=56%	5443/1991/1511/2150/820/54210/4615/3080/81494
BP	GO:0002702	positive regulation of production of molecular mediator of immune response	62	0.28996	1.84853	0.0116907	0.0555607	0.0391438	1712	tags=39%	list=23%	signal=30%	940/2625/8809/51237/3554/91543/6504/958/7292/8764/1604/57142/11126/5590/3263/5950/2150/3815/972/10417/3135/7098/30009/7468
BP	GO:0007520	myoblast fusion	18	0.421573	1.76669	0.011682	0.0555607	0.0391438	4351	tags=100%	list=58%	signal=42%	5738/824/963/4656/30846/11096/10211/4283/51177/779/3756/130827/85461/92304/9750/4868/3566/575
BP	GO:0035791	platelet-derived growth factor receptor-beta signaling pathway	31	0.354703	1.81813	0.0118636	0.0563298	0.0396856	2297	tags=58%	list=31%	signal=40%	2261/2321/3791/4921/238/3815/2050/9026/7010/5156/5159/2041/4914/1969/2046/2048/284656/7075
BP	GO:0031638	zymogen activation	18	0.42045	1.76199	0.0118783	0.0563471	0.0396978	1444	tags=56%	list=19%	signal=45%	3240/5345/715/2266/350/3816/7057/64115/3250/3818
BP	GO:0051148	negative regulation of muscle cell differentiation	23	0.394002	1.80505	0.0119419	0.0565956	0.0398729	1840	tags=57%	list=25%	signal=43%	2069/79365/221476/9868/1048/22943/2254/28514/5997/84814/4086/4487/2146
BP	GO:0000075	cell cycle checkpoint signaling	81	0.257634	1.76389	0.0120935	0.0572608	0.0403415	4347	tags=79%	list=58%	signal=34%	699/6419/55159/57405/7272/332/11130/63967/4998/1063/51514/348654/595/25949/5888/983/220134/55143/1869/27183/9319/990/5347/675/701/9212/29980/26270/10459/991/84072/83540/7175/25896/163859/9577/4436/54465/147841/641/672/3014/1407/891/3619/7508/57646/57082/2074/2177/83990/54962/8720/51720/221150/9024/26058/5591/5932/472/51322/55055/81620/51451
BP	GO:0071260	cellular response to mechanical stimulus	26	0.386292	1.85363	0.0121129	0.0572989	0.0403683	1892	tags=54%	list=25%	signal=40%	943/958/7100/5339/10746/6513/1647/3759/2022/7132/7098/5734/4615/22927
BP	GO:0030510	regulation of BMP signaling pathway	42	0.324443	1.84458	0.0121833	0.0575784	0.0405652	2569	tags=60%	list=34%	signal=39%	2200/4681/26585/3791/9241/53918/10468/22943/6423/6664/25928/2022/652/5046/2627/10272/4487/222223/6497/388585/79639/3491/51592/4853/148738
MF	GO:0019209	kinase activator activity	51	0.308712	1.86362	0.0123552	0.0580714	0.0409126	1410	tags=35%	list=19%	signal=29%	7039/100133941/26228/26585/2069/51738/595/2662/8575/245711/238/959/8115/374/79817/28984/652/80174
BP	GO:1901861	regulation of muscle tissue development	16	0.459562	1.84401	0.0123007	0.0580714	0.0409126	1843	tags=62%	list=25%	signal=47%	51176/1063/4656/1385/652/28514/7291/10211/596/57158
BP	GO:0009791	post-embryonic development	40	0.326148	1.81976	0.0123678	0.0580714	0.0409126	1426	tags=38%	list=19%	signal=31%	64919/6571/2625/6905/639/3791/34/23334/2016/51542/4594/1990/652/10512/59338
BP	GO:0071772	response to BMP	67	0.276243	1.80634	0.0123596	0.0580714	0.0409126	2569	tags=52%	list=34%	signal=35%	2200/4774/4681/51176/2625/26585/7049/3791/91/9241/53918/10468/1311/22943/6423/6664/25928/8287/2022/4093/652/4086/5046/2627/10272/4487/222223/6497/388585/26508/79639/3491/51592/4853/148738
BP	GO:0071773	cellular response to BMP stimulus	67	0.276243	1.80634	0.0123596	0.0580714	0.0409126	2569	tags=52%	list=34%	signal=35%	2200/4774/4681/51176/2625/26585/7049/3791/91/9241/53918/10468/1311/22943/6423/6664/25928/8287/2022/4093/652/4086/5046/2627/10272/4487/222223/6497/388585/26508/79639/3491/51592/4853/148738
BP	GO:0070925	organelle assembly	342	0.177417	1.54487	0.0123303	0.0580714	0.0409126	4701	tags=75%	list=63%	signal=29%	259266/1058/88/8556/55125/84628/1731/91782/3983/1183/4771/9787/4751/332/54443/9493/583/89781/80206/1063/11346/9378/9639/6382/10806/5861/200162/54935/51100/57535/84173/1104/83452/5339/56270/64793/1639/30845/4703/84217/987/92749/51112/440738/85452/8195/92344/93594/23059/2934/130916/170690/220134/22974/81624/6232/144165/4606/55143/30846/28988/4884/83939/7429/283/57562/8632/23682/5156/3754/7168/3833/…
BP	GO:0045944	positive regulation of transcription by RNA polymerase II	434	0.16498	1.4668	0.0123303	0.0580714	0.0409126	2055	tags=35%	list=27%	signal=27%	4774/1901/940/51176/64919/4008/2078/2625/7153/3725/53335/26585/9760/6689/26586/7025/3552/5443/3664/126626/688/958/55252/137735/7068/23175/2034/6041/7022/8648/7161/7799/2736/4520/64754/23261/7709/130557/63976/343472/4656/256297/54897/1855/6018/22887/9241/3212/26149/8631/1385/6774/55022/7644/5345/5450/3624/1081/27319/6423/116/3479/3976/6664/4060/2150/8061/6874/64375/3400/6925/944/80237/1990/1316/75…
BP	GO:0014812	muscle cell migration	38	0.344114	1.89323	0.0124239	0.0582807	0.04106	1580	tags=45%	list=21%	signal=36%	80310/1545/6282/5031/4921/7015/2887/7448/10631/3479/4192/2254/9510/652/7168/5159/301
BP	GO:0060324	face development	17	0.44042	1.80614	0.0124673	0.0583228	0.0410897	2028	tags=65%	list=27%	signal=47%	51176/8195/9241/220/22943/144165/5156/59338/4487/2033/6497
BP	GO:0048730	epidermis morphogenesis	14	0.473636	1.77521	0.0124502	0.0583228	0.0410897	2695	tags=79%	list=36%	signal=50%	2736/92344/1823/10468/3872/25928/2252/94234/596/388698/84283
BP	GO:0050890	cognition	101	0.244705	1.76606	0.0124673	0.0583228	0.0410897	2001	tags=44%	list=27%	signal=32%	177/5176/9378/3122/84879/8704/1996/6900/431707/5590/9486/9241/1385/22943/64478/8867/8061/4248/3815/23316/1268/2628/4192/4923/5575/22829/590/8516/4311/6833/23542/2534/123016/814/23259/90410/5532/2033/3949/7097/7991/4891/729956/4914
CC	GO:0098796	membrane protein complex	421	0.167054	1.4812	0.0124797	0.0583269	0.0410926	4903	tags=77%	list=65%	signal=28%	149233/163702/777/3680/50852/919/28639/51361/91782/7018/915/3119/8809/925/974/93145/3115/3118/7049/3117/2703/4688/4707/3111/245972/155066/7188/2791/958/8807/3122/2060/3772/57463/55248/131096/245973/8503/3140/91/2780/284697/3339/1639/845/127124/8514/10542/6464/57657/1261/8515/57685/374291/6687/917/923/28683/916/55707/8631/9868/8645/55013/3779/920/54941/7448/84329/2556/3120/3507/2206/3479/81624/377…
BP	GO:0090092	regulation of transmembrane receptor protein serine/threonine kinase signaling pathway	91	0.245582	1.73783	0.0125594	0.0586454	0.041317	2031	tags=43%	list=27%	signal=32%	2200/4681/116844/7272/26585/7049/3791/8425/91/63976/9241/53918/10468/83891/3624/22943/6423/6664/25928/56937/7057/2022/2254/10252/2201/652/65997/8516/5046/6935/2627/10272/4487/84312/2033/222223/10370/6497/388585
MF	GO:0004726	non-membrane spanning protein tyrosine phosphatase activity	36	0.335251	1.81428	0.0126441	0.0588243	0.041443	603	tags=25%	list=8%	signal=23%	8556/5792/9829/995/7803/2140/5784/54935/5778
MF	GO:0030946	protein tyrosine phosphatase activity metal-dependent	36	0.335251	1.81428	0.0126441	0.0588243	0.041443	603	tags=25%	list=8%	signal=23%	8556/5792/9829/995/7803/2140/5784/54935/5778
MF	GO:0140793	histone H2AXY142 phosphatase activity	36	0.335251	1.81428	0.0126441	0.0588243	0.041443	603	tags=25%	list=8%	signal=23%	8556/5792/9829/995/7803/2140/5784/54935/5778
BP	GO:1902679	negative regulation of RNA biosynthetic process	422	0.16849	1.49494	0.0126292	0.0588243	0.041443	2100	tags=36%	list=28%	signal=27%	55635/1912/51176/84864/2625/6097/332/3725/53335/26585/2069/79656/57708/7025/274/7088/57507/22955/79365/56950/10172/688/605/7538/1063/376940/7292/257101/639/8462/9734/7068/10628/3399/10507/595/7022/84944/7799/2736/473/7709/6464/63976/7227/55729/9241/26149/51339/1991/1385/51123/6774/1647/6932/7644/10468/2167/2810/9582/22943/6423/6664/144165/64375/3400/220929/51523/165631/124535/1990/11279/23316/186…
BP	GO:0048871	multicellular organismal-level homeostasis	325	0.175661	1.52405	0.0127914	0.0594549	0.0418873	4224	tags=68%	list=56%	signal=31%	1901/5320/249/3575/7018/1236/2625/8809/3574/7049/3552/9636/51738/583/7538/261734/1880/54206/84879/3791/23175/79888/2034/91/3162/2780/9462/94097/6513/6900/1907/4520/3953/63976/238/2016/51542/8195/9469/18/340547/6774/174/2887/10000/6696/12/51297/2167/1311/5950/3624/1734/54/116/81624/23495/144165/7082/5366/3815/1268/100506658/972/2628/64116/4923/3579/11096/9770/5745/30061/9536/652/4254/28514/1000/72…
BP	GO:0030509	BMP signaling pathway	62	0.28659	1.82704	0.0128352	0.0596036	0.0419921	2031	tags=45%	list=27%	signal=33%	2200/4774/4681/51176/26585/7049/3791/91/9241/53918/10468/1311/22943/6423/6664/25928/8287/2022/4093/652/4086/5046/2627/10272/4487/222223/6497/388585
BP	GO:2000106	regulation of leukocyte apoptotic process	43	0.327481	1.87503	0.0128649	0.0596869	0.0420508	2060	tags=51%	list=27%	signal=37%	939/3575/64919/1236/6097/22920/917/3958/384/972/3579/6387/652/4254/6482/301/96459/57181/596/9212/26155/5293
BP	GO:0006040	amino sugar metabolic process	21	0.434303	1.93492	0.0128972	0.0597277	0.0420795	2521	tags=67%	list=34%	signal=44%	1118/1117/6675/80896/9469/64841/1116/4248/6482/1486/23443/2135/27159/5016
BP	GO:1902622	regulation of neutrophil migration	20	0.429067	1.86829	0.0128872	0.0597277	0.0420795	1249	tags=45%	list=17%	signal=38%	1803/1236/3552/3554/3576/57142/972/4192/3579
MF	GO:0098631	cell adhesion mediator activity	34	0.340973	1.80087	0.0129975	0.0601372	0.042368	1581	tags=41%	list=21%	signal=33%	3680/177/6282/6504/1832/1266/6900/23114/8515/5365/342035/79987/301/10890
BP	GO:0071676	negative regulation of mononuclear cell migration	20	0.428699	1.86668	0.013081	0.0601394	0.0423695	1878	tags=55%	list=25%	signal=41%	11240/4681/257144/26228/26585/131450/84830/6347/8976/9466/23143
BP	GO:0042303	molting cycle	37	0.340621	1.86437	0.0130512	0.0601394	0.0423695	1441	tags=43%	list=19%	signal=35%	10913/91/10269/2736/7015/92344/1823/10468/3624/22943/3872/25928/79152/2252/94234/51083
BP	GO:0042633	hair cycle	37	0.340621	1.86437	0.0130512	0.0601394	0.0423695	1441	tags=43%	list=19%	signal=35%	10913/91/10269/2736/7015/92344/1823/10468/3624/22943/3872/25928/79152/2252/94234/51083
BP	GO:0002690	positive regulation of leukocyte chemotaxis	37	0.340313	1.86268	0.0130512	0.0601394	0.0423695	1367	tags=43%	list=18%	signal=36%	1236/3576/57402/6504/1907/23075/10563/1908/2150/972/7057/7423/4192/3579/6387/5919
CC	GO:0000776	kinetochore	65	0.277047	1.79294	0.0130129	0.0601394	0.0423695	712	tags=22%	list=9%	signal=20%	699/91782/57405/7272/4751/332/11130/10540/1063/11004/25909/253635/1639/51112
MF	GO:0001968	fibronectin binding	14	0.472119	1.76952	0.0130675	0.0601394	0.0423695	3488	tags=93%	list=46%	signal=50%	2192/6423/131578/7057/2041/10272/1514/4237/1520/4653/84695/7130/7422
BP	GO:0021782	glial cell development	50	0.293742	1.76076	0.0130717	0.0601394	0.0423695	2031	tags=46%	list=27%	signal=34%	9334/1191/177/712/4919/26227/9639/5339/6900/6664/208/3400/79152/10810/4192/28514/3949/7097/6659/400746/54587/6497/388585
BP	GO:0006220	pyrimidine nucleotide metabolic process	16	0.457289	1.83489	0.0131007	0.0601754	0.0423949	433	tags=31%	list=6%	signal=30%	26289/978/129607/347736/1806
BP	GO:0050821	protein stabilization	72	0.266557	1.76101	0.0131335	0.0602714	0.0424625	2797	tags=58%	list=37%	signal=37%	1191/22848/89781/7203/8575/57142/1855/1385/335/1370/3479/338328/208/173/9026/972/5190/9770/5217/285282/10211/8774/482/4487/2033/6659/3320/8863/11315/23352/23252/65018/23673/64175/23032/6125/1942/112770/149628/5824/336/481
CC	GO:0005905	clathrin-coated pit	28	0.362772	1.77007	0.0132338	0.0605674	0.042671	1485	tags=43%	list=20%	signal=35%	7018/6401/22848/57007/2060/6272/284697/55707/8867/9026/57214/23048
CC	GO:0098687	chromosomal region	136	0.223727	1.72022	0.0132321	0.0605674	0.042671	3993	tags=70%	list=53%	signal=33%	699/1058/91782/57405/7153/7272/4751/332/11130/10540/4998/1063/11004/25909/253635/245711/1639/7015/51112/5888/983/220134/55143/23255/3021/9770/5892/1051/3835/8362/51510/8368/5347/3070/23081/5424/675/7014/2146/8294/56160/701/9212/151648/3104/55920/7798/991/9682/23421/2959/55791/64858/6847/57459/11243/83540/91687/7175/5525/25936/142/5664/8290/55746/79677/79172/4436/7514/51652/23332/4175/5000/55183/8…
CC	GO:0030658	transport vesicle membrane	93	0.236862	1.67842	0.0132333	0.0605674	0.042671	1224	tags=27%	list=16%	signal=23%	7039/6571/3119/3115/3118/274/3117/155066/3122/5861/284697/90342/127124/8291/284612/23095/81615/3120/762/81611/140679/374/3127/3113/972
CC	GO:0098576	lumenal side of membrane	20	0.428207	1.86454	0.0132748	0.0605908	0.0426876	1752	tags=55%	list=23%	signal=42%	3119/3115/3118/3117/3122/3120/3127/3113/972/3135/121665
CC	GO:0000940	outer kinetochore	14	0.471114	1.76576	0.0132733	0.0605908	0.0426876	3978	tags=100%	list=53%	signal=47%	699/57405/11130/1063/220134/5347/701/11243/83540/25936/147841/891/57082/221150
BP	GO:0099558	maintenance of synapse structure	14	0.471093	1.76568	0.0132733	0.0605908	0.0426876	2283	tags=71%	list=30%	signal=50%	6272/9699/1639/27445/144165/91584/1739/51150/114784/9783
BP	GO:0050918	positive chemotaxis	29	0.365429	1.8212	0.0133087	0.0606908	0.042758	1798	tags=52%	list=24%	signal=39%	1901/177/3576/3791/3958/2150/5365/7423/2252/6387/652/9037/1012/3603/1233
BP	GO:0050857	positive regulation of antigen receptor-mediated signaling pathway	15	0.470463	1.82777	0.0133324	0.0607445	0.0427958	389	tags=33%	list=5%	signal=32%	50852/9840/1236/26228/3932
BP	GO:0010876	lipid localization	173	0.202883	1.62639	0.0134146	0.0610643	0.0430211	3763	tags=64%	list=50%	signal=32%	26119/5320/225/79895/344/154664/1191/26207/183/29881/3552/2172/51738/5443/84879/57198/3990/55187/6513/57540/9890/51542/23120/335/337/114884/6696/160518/5244/2167/5950/3624/29923/9388/28965/350/6579/208/89874/11309/7057/4923/151176/9536/1066/51083/5007/63982/8647/8435/27183/301/341/10802/3949/3783/153768/196527/338/80772/30814/26279/64600/391013/8431/23673/55113/2170/80149/114883/1376/255738/24/11…
BP	GO:0042551	neuron maturation	13	0.492079	1.81958	0.0134809	0.061106	0.0430505	2146	tags=69%	list=29%	signal=50%	9334/53335/712/6900/342035/9175/596/375790/2046
BP	GO:0010828	positive regulation of D-glucose transmembrane transport	17	0.438248	1.79723	0.0134647	0.061106	0.0430505	1468	tags=53%	list=20%	signal=43%	55600/6041/7015/388581/3479/208/100506658/151176/5584
BP	GO:0043373	CD4-positive alpha-beta T cell lineage commitment	17	0.438159	1.79687	0.0134647	0.061106	0.0430505	2069	tags=59%	list=28%	signal=43%	4063/149233/9760/3716/6774/10538/30009/2033/1514/2475
BP	GO:0061138	morphogenesis of a branching epithelium	67	0.272728	1.78336	0.0134905	0.061106	0.0430505	1400	tags=37%	list=19%	signal=31%	51176/183/26585/3791/4070/157506/2736/9241/9620/170690/6423/64399/64478/374/2022/4192/133/5076/6943/10252/2252/7472/652/10512/1739
BP	GO:2000352	negative regulation of endothelial cell apoptotic process	10	0.527286	1.74037	0.0134961	0.061106	0.0430505	1383	tags=60%	list=18%	signal=49%	2625/3791/7015/2266/7010/9037
MF	GO:0005149	interleukin-1 receptor binding	10	0.526737	1.73856	0.0134961	0.061106	0.0430505	3559	tags=100%	list=47%	signal=53%	3552/7100/4615/27178/56300/27179/27177/26525/84639/3557
BP	GO:0006413	translational initiation	37	0.33861	1.85336	0.0135768	0.0614165	0.0432693	4801	tags=97%	list=64%	signal=35%	9451/1939/55024/208/9086/83939/9811/1977/3315/22927/10289/2475/8672/51441/10657/8891/7812/127933/7175/5317/4528/9669/8669/5936/56339/5610/56919/64410/55364/6352/26058/8893/8666/8668/1968/3646
CC	GO:0042101	T cell receptor complex	38	0.34103	1.87626	0.0136402	0.0616482	0.0434325	4817	tags=97%	list=64%	signal=35%	50852/919/28639/915/925/917/923/28683/916/8631/920/28669/926/28567/28638/28568/28667/6967/634/7535/28674/28614/28559/28755/28635/28616/28643/28595/28682/28660/6983/28676/28583/28596/28569/28688/28646
MF	GO:0004713	protein tyrosine kinase activity	65	0.275769	1.78466	0.0136676	0.0617173	0.0434812	2934	tags=58%	list=39%	signal=36%	2261/3702/7272/2321/3932/3716/9451/3791/2051/4921/238/640/55872/3815/2050/7010/5156/5159/2534/2041/8445/4145/7273/4914/2475/1969/2046/2048/284656/7075/10420/204851/1944/1196/3645/27/25778/8444
CC	GO:0030055	cell-substrate junction	155	0.209694	1.65691	0.01369	0.0617635	0.0435138	1868	tags=34%	list=25%	signal=26%	9173/88/2261/1803/960/4008/9404/9493/2321/10395/2273/58504/3716/8462/824/58497/1266/5339/7531/3339/30845/23114/4921/8394/6464/57514/2934/5244/55740/83543/7010/2022/85464/1000/8516/4311/2535/1012/8994/5159/10211/847/301/10890/4810/3603/8573/3315/5094/3655/29843/5786
BP	GO:0002524	hypersensitivity	10	0.526575	1.73803	0.0137053	0.0617776	0.0435237	885	tags=50%	list=12%	signal=44%	1236/2625/2205/2213/3500
BP	GO:0001841	neural tube formation	34	0.337489	1.78247	0.0137246	0.0618096	0.0435462	2461	tags=62%	list=33%	signal=42%	65979/10395/9241/23059/7289/9620/6423/144165/133/5076/652/7291/55764/10370/6497/4524/7798/57822/6491/8915/11146
BP	GO:0034308	primary alcohol metabolic process	33	0.348558	1.83831	0.0137395	0.0618215	0.0435546	1401	tags=42%	list=19%	signal=35%	10901/9249/1545/157506/54884/9563/27010/220/5950/3479/10170/124/125/27163
BP	GO:0008543	fibroblast growth factor receptor signaling pathway	52	0.297237	1.799	0.013793	0.0620073	0.0436855	2297	tags=52%	list=31%	signal=36%	2261/2625/2321/9378/3791/4921/238/9241/64399/3815/2050/7057/7010/2254/10252/56975/2252/5156/5159/10251/2041/4914/1969/2046/2048/284656/7075
BP	GO:0010810	regulation of cell-substrate adhesion	82	0.253114	1.73612	0.0139001	0.0624129	0.0439712	1242	tags=29%	list=17%	signal=25%	9806/4680/1236/4771/26585/10395/5581/4811/23499/3791/4070/2192/5590/916/8631/10562/335/7448/2266/1295/10631/7057/7010/4192
BP	GO:0003007	heart morphogenesis	99	0.236649	1.70312	0.0139078	0.0624129	0.0439712	3037	tags=58%	list=40%	signal=35%	1901/2625/9249/10395/7049/1832/10269/57142/1855/8195/9241/23059/5950/22943/6423/6664/144165/51384/2050/7010/2022/9510/11096/10252/7472/652/28514/7291/10512/7168/2535/6091/2627/6604/7468/4487/200894/6659/10370/7273/388591/2475/26508/6491/3491/1301/64783/4853/8751/1942/57216/7139/4194/10637/89780/54583/6262
BP	GO:1901379	regulation of potassium ion transmembrane transport	37	0.336896	1.84398	0.0141023	0.0631182	0.0444682	2089	tags=51%	list=28%	signal=37%	88/274/2273/57463/7531/845/8514/3779/1908/3759/1739/51083/967/482/3783/29843/196527/4878/126755
BP	GO:0046683	response to organophosphorus	32	0.350052	1.82558	0.0140818	0.0631182	0.0444682	1343	tags=41%	list=18%	signal=34%	1545/1036/54206/6382/87178/5031/1261/5026/8061/374/7010/5029/445
BP	GO:0045444	fat cell differentiation	90	0.243634	1.71222	0.0141004	0.0631182	0.0444682	1786	tags=37%	list=24%	signal=28%	54463/116844/6097/3914/583/28951/688/7538/55252/6272/6041/595/2662/6900/63976/8195/1385/4320/2167/6423/208/3400/1869/5156/5919/5997/221395/1051/1487/123016/51316/2869/2033
BP	GO:0060392	negative regulation of SMAD protein signal transduction	10	0.526165	1.73668	0.0141238	0.0631586	0.0444966	1238	tags=60%	list=16%	signal=50%	26585/7049/9241/22943/56937/2022
MF	GO:0001848	complement binding	15	0.467093	1.81468	0.0141466	0.0632047	0.0445291	2876	tags=80%	list=38%	signal=49%	1380/11326/3075/1378/10747/731/325/1401/10878/10877/3080/81494
BP	GO:0030038	contractile actin filament bundle assembly	44	0.306895	1.77277	0.0141957	0.0633126	0.0446051	2164	tags=50%	list=29%	signal=36%	1901/4771/10395/11346/9639/4070/8195/335/5345/7082/221692/28984/7168/5217/2041/5734/123016/2475/55160/7798/55616/3925
BP	GO:0043149	stress fiber assembly	44	0.306895	1.77277	0.0141957	0.0633126	0.0446051	2164	tags=50%	list=29%	signal=36%	1901/4771/10395/11346/9639/4070/8195/335/5345/7082/221692/28984/7168/5217/2041/5734/123016/2475/55160/7798/55616/3925
BP	GO:0002823	negative regulation of adaptive immune response based on somatic recombination of immune receptors built from immunoglobulin superfamily domains	32	0.349545	1.82293	0.0142611	0.0635465	0.0447699	4216	tags=88%	list=56%	signal=39%	55061/9173/3575/1380/6504/7292/1378/2213/3821/3135/30009/5532/9466/80149/51043/149041/5788/722/1379/4179/84695/634/80762/3824/3077/259307/383/3566
BP	GO:0045892	negative regulation of DNA-templated transcription	419	0.166745	1.4783	0.0142732	0.0635465	0.0447699	2100	tags=36%	list=28%	signal=27%	55635/1912/51176/84864/2625/6097/332/3725/53335/26585/2069/79656/57708/7025/274/7088/57507/22955/79365/56950/10172/688/605/7538/1063/376940/7292/257101/639/8462/9734/7068/10628/3399/10507/595/7022/84944/7799/2736/473/7709/6464/63976/7227/55729/9241/26149/51339/1991/1385/51123/6774/1647/6932/7644/10468/2167/2810/22943/6423/6664/144165/64375/3400/220929/51523/165631/124535/1990/11279/23316/1869/202…
BP	GO:0045980	negative regulation of nucleotide metabolic process	13	0.490701	1.81448	0.0142918	0.0635734	0.0447889	854	tags=46%	list=11%	signal=41%	54541/978/84676/57103/6774/55022
BP	GO:0035988	chondrocyte proliferation	12	0.476154	1.702	0.0143501	0.0637211	0.0448929	954	tags=42%	list=13%	signal=36%	2261/51176/54206/4921/1311
BP	GO:0046337	phosphatidylethanolamine metabolic process	12	0.475748	1.70055	0.0143501	0.0637211	0.0448929	485	tags=33%	list=6%	signal=31%	5320/5920/84879/23175
BP	GO:0050931	pigment cell differentiation	19	0.415999	1.77939	0.0143741	0.0637715	0.0449285	1820	tags=58%	list=24%	signal=44%	84079/89781/4948/1908/3815/23682/4254/10981/967/2737/596
BP	GO:2000107	negative regulation of leukocyte apoptotic process	33	0.346284	1.82632	0.0144579	0.0640872	0.0451509	2006	tags=52%	list=27%	signal=38%	939/3575/64919/1236/6097/22920/384/972/3579/6387/652/4254/6482/57181/596/9212/26155
BP	GO:0101023	vascular endothelial cell proliferation	10	0.525454	1.73433	0.0145423	0.064349	0.0453353	1242	tags=60%	list=17%	signal=50%	2321/51738/6774/10000/6347/4192
BP	GO:1905562	regulation of vascular endothelial cell proliferation	10	0.525454	1.73433	0.0145423	0.064349	0.0453353	1242	tags=60%	list=17%	signal=50%	2321/51738/6774/10000/6347/4192
BP	GO:0055013	cardiac muscle cell development	37	0.335394	1.83576	0.0146279	0.0646713	0.0455624	2069	tags=51%	list=28%	signal=37%	88/80206/5339/221476/10269/4703/9868/983/3479/144165/6444/652/5156/5997/5159/10529/7273/4629/2475
BP	GO:0051253	negative regulation of RNA metabolic process	458	0.16494	1.47071	0.0147216	0.0650288	0.0458143	2100	tags=35%	list=28%	signal=27%	55635/1912/10642/51176/84864/2625/6097/332/3725/115572/53335/26585/2069/79656/57708/7025/54855/274/7088/57507/22955/79365/56950/7188/10172/688/605/7538/1063/376940/7292/257101/639/8462/9734/7068/10628/6429/3399/10507/595/7022/84944/7799/1996/2736/473/7709/6464/63976/7227/55729/9241/26149/51339/1991/8148/1385/51123/6774/1647/6932/7644/10468/2167/2810/9582/22943/6423/6664/144165/64375/3400/220929/5…
BP	GO:0000768	syncytium formation by plasma membrane fusion	20	0.421685	1.83614	0.0148251	0.0650892	0.0458568	4351	tags=100%	list=58%	signal=42%	5738/9644/824/963/4656/30846/11096/10211/4283/51177/779/3756/79805/130827/85461/92304/9750/4868/3566/575
BP	GO:0140253	cell-cell fusion	20	0.421685	1.83614	0.0148251	0.0650892	0.0458568	4351	tags=100%	list=58%	signal=42%	5738/9644/824/963/4656/30846/11096/10211/4283/51177/779/3756/79805/130827/85461/92304/9750/4868/3566/575
BP	GO:0060343	trabecula formation	11	0.528743	1.81246	0.0148137	0.0650892	0.0458568	1330	tags=64%	list=18%	signal=52%	26585/7049/5950/7010/9510/2201/30061
BP	GO:0007094	mitotic spindle assembly checkpoint signaling	27	0.370599	1.79407	0.0147933	0.0650892	0.0458568	4347	tags=93%	list=58%	signal=39%	699/57405/7272/332/11130/1063/348654/220134/55143/9319/5347/701/9212/10459/991/83540/7175/147841/891/3619/57082/221150/472/55055/51451
BP	GO:0031577	spindle checkpoint signaling	27	0.370599	1.79407	0.0147933	0.0650892	0.0458568	4347	tags=93%	list=58%	signal=39%	699/57405/7272/332/11130/1063/348654/220134/55143/9319/5347/701/9212/10459/991/83540/7175/147841/891/3619/57082/221150/472/55055/51451
BP	GO:0071173	spindle assembly checkpoint signaling	27	0.370599	1.79407	0.0147933	0.0650892	0.0458568	4347	tags=93%	list=58%	signal=39%	699/57405/7272/332/11130/1063/348654/220134/55143/9319/5347/701/9212/10459/991/83540/7175/147841/891/3619/57082/221150/472/55055/51451
BP	GO:0071174	mitotic spindle checkpoint signaling	27	0.370599	1.79407	0.0147933	0.0650892	0.0458568	4347	tags=93%	list=58%	signal=39%	699/57405/7272/332/11130/1063/348654/220134/55143/9319/5347/701/9212/10459/991/83540/7175/147841/891/3619/57082/221150/472/55055/51451
BP	GO:0055123	digestive system development	53	0.296988	1.81249	0.0148934	0.0653326	0.0460283	1617	tags=42%	list=22%	signal=33%	79971/3576/3142/688/639/2736/57103/256297/51339/6423/6664/3815/1990/9026/6943/2295/2254/445/5156/5919/2627/2737
CC	GO:0042734	presynaptic membrane	56	0.284765	1.7573	0.0150773	0.0660402	0.0465267	3144	tags=64%	list=42%	signal=38%	84628/140/712/9829/9378/9699/9627/84966/55361/8061/1268/1000/6833/2775/8573/490/57706/1947/2048/4985/2899/9783/6536/22854/3749/51107/23208/3765/93185/23385/493/3756/25782/5664/50618/9381
BP	GO:0043009	chordate embryonic development	240	0.189629	1.60077	0.0150808	0.0660402	0.0465267	3022	tags=52%	list=40%	signal=32%	6241/51176/2625/4751/65979/284723/10395/54855/5723/26227/9644/639/84172/824/157506/57448/2034/91/8648/2736/25949/57142/2016/343263/51542/1855/57498/9241/3212/23059/7289/51339/53918/9620/201895/5950/22943/6423/3479/3976/81624/6664/8061/144165/154197/133/84660/79733/5076/2254/7472/5745/652/5156/28514/7291/10512/1739/4097/23764/221395/1051/3235/54700/6935/2627/2737/3216/55764/23081/4487/54892/2033/2…
MF	GO:0140640	catalytic activity acting on a nucleic acid	202	0.192693	1.58346	0.0151721	0.0663827	0.0467681	4062	tags=68%	list=54%	signal=32%	249/6419/7153/55278/27030/51106/10623/164045/54920/6894/84172/79712/51455/8886/10352/348654/87178/6041/57470/4343/1615/2956/54802/7015/23020/58511/6687/11325/122402/5888/55247/8653/55510/154197/283/6038/10924/57038/5892/6035/23351/1665/55760/27183/123283/1861/27348/3070/10721/112479/5424/4439/5427/7014/96764/4615/126789/54973/1677/26038/5394/5511/8565/80149/64789/4595/114034/8438/387338/23318/259…
BP	GO:0060966	regulation of gene silencing by regulatory ncRNA	13	0.488309	1.80564	0.0153054	0.0668027	0.047064	834	tags=46%	list=11%	signal=41%	7538/8575/84944/10269/389421/6774
BP	GO:0034698	response to gonadotropin	13	0.487172	1.80143	0.0153054	0.0668027	0.047064	3409	tags=92%	list=45%	signal=50%	1545/7049/3624/5069/890/6716/2627/2730/2046/3973/2492/7849
BP	GO:0050801	monoatomic ion homeostasis	204	0.193492	1.59175	0.0153076	0.0668027	0.047064	1457	tags=28%	list=19%	signal=23%	249/7018/1236/817/183/5581/3552/57402/540/245972/155066/958/3932/4948/3791/51027/2034/150684/391059/3162/5031/7531/845/11330/1907/284612/51542/57217/23400/26249/55013/1991/930/84329/3263/771/23627/1908/3759/1268/6368/64116/4923/151176/5029/7225/23682/5745/30061/285195/6444/6387/10699/8989/57419/6340/57214
BP	GO:2000242	negative regulation of reproductive process	29	0.362513	1.80667	0.0153279	0.0668226	0.047078	1391	tags=45%	list=19%	signal=37%	7272/11130/3552/5176/84944/3479/3976/9088/3815/7076/55840/652/11251
CC	GO:0005911	cell-cell junction	199	0.18996	1.55759	0.0153385	0.0668226	0.047078	2289	tags=39%	list=30%	signal=28%	914/128239/3702/1803/387357/79652/57125/4771/10207/2703/6282/261734/11346/81607/963/10806/1832/5586/595/1266/9578/23254/57449/6513/23114/84966/10256/5590/916/1823/8631/5244/26872/117/5101/7082/3759/93377/3815/100506658/7010/7225/137075/28514/1000/1739/1012/8994/5584/10211/27040/8647/301/10890/4810/85302/92359/7074/5796/8573/10791/3655/23322/5872/5583/360/54587/55966/11315/1969/7798/10076/2709/127…
BP	GO:0022404	molting cycle process	32	0.345426	1.80145	0.0155168	0.0671954	0.0473406	1441	tags=44%	list=19%	signal=36%	10913/91/10269/2736/92344/1823/10468/3624/22943/3872/25928/2252/94234/51083
BP	GO:0022405	hair cycle process	32	0.345426	1.80145	0.0155168	0.0671954	0.0473406	1441	tags=44%	list=19%	signal=36%	10913/91/10269/2736/92344/1823/10468/3624/22943/3872/25928/2252/94234/51083
BP	GO:0043112	receptor metabolic process	25	0.376472	1.77299	0.015493	0.0671954	0.0473406	2380	tags=60%	list=32%	signal=41%	50852/2060/5192/51100/29116/30845/83891/5190/27065/51510/3949/8934/1889/7805/255738
BP	GO:0051321	meiotic cell cycle	101	0.241453	1.7426	0.0154469	0.0671954	0.0473406	3978	tags=71%	list=53%	signal=34%	259266/1731/7153/7272/4751/2069/11130/27030/995/8900/23397/164045/84944/245711/2956/22887/122402/5888/220134/84057/3976/9088/124535/7283/7589/5892/9700/9232/9319/5347/4487/4439/675/64682/8881/151648/2827/51441/991/8438/55706/4438/676/388649/6847/84072/11022/83540/81626/56776/9156/56603/10018/5000/7156/9133/5889/2175/51547/3014/286151/3619/57082/143689/1164/56339/2177/83990/56154/284071/7516/221150
MF	GO:0016462	pyrophosphatase activity	279	0.181073	1.55384	0.0154858	0.0671954	0.0473406	2041	tags=35%	list=27%	signal=27%	9928/249/225/79895/1731/154664/146909/9493/340273/27030/540/2791/83858/4998/84513/164045/11004/3310/2635/8886/7203/57198/5861/6004/58497/83452/2780/26052/4343/127124/64222/11321/23020/23095/151011/23400/6687/55729/23120/5996/168537/79710/11325/5244/122402/4594/5888/10112/10381/116987/8653/84617/148252/55510/5190/201625/23682/51285/8490/65997/10924/387496/5997/3833/5217/55567/5892/10981/285282/683…
MF	GO:0016817	hydrolase activity acting on acid anhydrides	279	0.181073	1.55384	0.0154858	0.0671954	0.0473406	2041	tags=35%	list=27%	signal=27%	9928/249/225/79895/1731/154664/146909/9493/340273/27030/540/2791/83858/4998/84513/164045/11004/3310/2635/8886/7203/57198/5861/6004/58497/83452/2780/26052/4343/127124/64222/11321/23020/23095/151011/23400/6687/55729/23120/5996/168537/79710/11325/5244/122402/4594/5888/10112/10381/116987/8653/84617/148252/55510/5190/201625/23682/51285/8490/65997/10924/387496/5997/3833/5217/55567/5892/10981/285282/683…
MF	GO:0016818	hydrolase activity acting on acid anhydrides n phosphorus-containing anhydrides	279	0.181073	1.55384	0.0154858	0.0671954	0.0473406	2041	tags=35%	list=27%	signal=27%	9928/249/225/79895/1731/154664/146909/9493/340273/27030/540/2791/83858/4998/84513/164045/11004/3310/2635/8886/7203/57198/5861/6004/58497/83452/2780/26052/4343/127124/64222/11321/23020/23095/151011/23400/6687/55729/23120/5996/168537/79710/11325/5244/122402/4594/5888/10112/10381/116987/8653/84617/148252/55510/5190/201625/23682/51285/8490/65997/10924/387496/5997/3833/5217/55567/5892/10981/285282/683…
CC	GO:0030863	cortical cytoskeleton	43	0.319277	1.82806	0.0155912	0.0674598	0.0475269	1585	tags=40%	list=21%	signal=31%	88/4771/6401/54443/10395/6711/824/2995/6513/2934/27445/100820829/9026/1000/8976/10211/5357
BP	GO:1904705	regulation of vascular associated smooth muscle cell proliferation	24	0.403638	1.87561	0.0158531	0.0679458	0.0478693	1397	tags=46%	list=19%	signal=37%	26119/3725/5031/4921/7015/4318/3479/2254/9510/652/7168
BP	GO:1990874	vascular associated smooth muscle cell proliferation	24	0.403638	1.87561	0.0158531	0.0679458	0.0478693	1397	tags=46%	list=19%	signal=37%	26119/3725/5031/4921/7015/4318/3479/2254/9510/652/7168
BP	GO:2000047	regulation of cell-cell adhesion mediated by cadherin	11	0.526941	1.80628	0.0158643	0.0679458	0.0478693	3558	tags=100%	list=47%	signal=53%	5345/7082/8728/28984/10211/10459/10076/89780/4072/7422/9647
BP	GO:0043030	regulation of macrophage activation	26	0.375905	1.80378	0.0158114	0.0679458	0.0478693	2882	tags=69%	list=38%	signal=43%	9173/4317/26228/11326/55013/2213/972/7057/8530/1075/221395/671/3949/80149/284467/23208/5321/5788
BP	GO:0033046	negative regulation of sister chromatid segregation	28	0.358966	1.75149	0.0158618	0.0679458	0.0478693	504	tags=25%	list=7%	signal=23%	699/57405/7272/332/11130/1063/348654
BP	GO:0033048	negative regulation of mitotic sister chromatid segregation	28	0.358966	1.75149	0.0158618	0.0679458	0.0478693	504	tags=25%	list=7%	signal=23%	699/57405/7272/332/11130/1063/348654
BP	GO:0045841	negative regulation of mitotic metaphase/anaphase transition	28	0.358966	1.75149	0.0158618	0.0679458	0.0478693	504	tags=25%	list=7%	signal=23%	699/57405/7272/332/11130/1063/348654
BP	GO:0051985	negative regulation of chromosome segregation	28	0.358966	1.75149	0.0158618	0.0679458	0.0478693	504	tags=25%	list=7%	signal=23%	699/57405/7272/332/11130/1063/348654
BP	GO:1902100	negative regulation of metaphase/anaphase transition of cell cycle	28	0.358966	1.75149	0.0158618	0.0679458	0.0478693	504	tags=25%	list=7%	signal=23%	699/57405/7272/332/11130/1063/348654
BP	GO:1905819	negative regulation of chromosome separation	28	0.358966	1.75149	0.0158618	0.0679458	0.0478693	504	tags=25%	list=7%	signal=23%	699/57405/7272/332/11130/1063/348654
BP	GO:2000816	negative regulation of mitotic sister chromatid separation	28	0.358966	1.75149	0.0158618	0.0679458	0.0478693	504	tags=25%	list=7%	signal=23%	699/57405/7272/332/11130/1063/348654
BP	GO:0032880	regulation of protein localization	307	0.178116	1.5385	0.0157707	0.0679458	0.0478693	2197	tags=38%	list=29%	signal=28%	26119/88/919/4771/817/5581/3552/79971/91543/6711/22848/51738/10178/89781/11004/9378/3716/5208/9451/118424/7203/5784/51100/150684/7531/65220/9910/8514/9860/57142/10542/7015/51112/5590/388581/23400/1855/18/54585/9868/81831/55022/2934/640/23075/2266/79866/3958/2810/5950/84830/983/116/3479/131578/2150/208/4248/23255/1268/7429/283/2040/23682/652/1000/79899/1739/57214/5584/5007/8976/6833/2775/64114/271…
BP	GO:0007610	behavior	229	0.188919	1.58161	0.0158818	0.0679633	0.0478816	2916	tags=50%	list=39%	signal=31%	1803/6571/177/55342/5581/5176/51738/583/6905/605/261734/9378/824/84879/7068/8704/2780/8648/1996/1639/10269/6900/3953/3352/238/431707/5590/51542/1855/9486/8195/9241/18/1385/6774/220/22943/64478/8867/8061/3815/23316/1268/2628/7057/4192/4923/5575/22829/590/6387/8516/1602/4097/1977/4311/51083/3235/6833/2775/23542/2534/482/2737/552/814/23259/64854/90410/5532/2033/3949/596/7097/3251/4891/729956/4914/64…
[truncated: 142 more rows]

## Sheet: human_gsea_reactome
ID	Description	setSize	enrichmentScore	NES	pvalue	p.adjust	qvalue	rank	leading_edge	core_enrichment
[truncated: 75 more rows]

[truncated: 4 more sheets: human_gsea_kegg, human_ora_go, human_ora_reactome, human_ora_kegg]
