# Supplementary material for: Systems-Level Insights into Bronchopulmonary Dysplasia from Meta-Analysis of Genome- Scale Studies
Source: Research Square preprint supplement (doi:10.21203/rs.3.rs-8552464/v1), 2026-01-21
Supplement: Supplementary file 2 [file 94b9407b9238c5d250d72f06.xlsx]

## Sheet: Supplementary_table4
gene	Dai_34276789_data	Hamvas_30342483	Li_26030808	Luo_36514862_eqtl	Luo_36514862_SNPS	Ambalavanan_25449221	Hadchoul_data	Torgerson_30113228	Wang_23897914	Ahmed_37839510	Zasada_31445514	Zasada_31445514_day36GA	Bharracharya_22723293	Da_paepe_20718599	Fulton_30459472	Gong_32412065	Pietrzyk_24194948_down_day28	Pietrzyk_24194948_down_day5	Pietrzyk_24194948_up_day28	Pietrzyk_24194948_up_day5	Shen_33093882	Windhorst_37090732	Bhattacharya_33552042	Oji_mmuo_33177681_mRNA	Siddiah_37123538	Tsotakos_35947545_down	Yuon_chou_37507442_cpg_day14	Yuon_chou_37507442_cpg_day28	Yuon_chou_37507442_deg_cord	Yuon_chou_37507442_deg_day14	Yuon_chou_37507442_deg_day28	maic_score	contributors
RASGRP3	0	0	1.25219	0	0	0	0	1.77616	0	0	0	0	0	0	0	1.37521	0	0	0	0	0	0	0	0	0	0	1.15622	0	0	0	0	5.55978	GWAS: Torgerson_30113228, EXOMESEQ: Li_26030808, MICROARRAY: Gong_32412065, RNASEQ: Yuon_chou_37507442_cpg_day14
LRRN3	0	0	0	1.54399	0	0	0	0	0	0	0	0	0	0	0	0	1.66373	0	0	1.52956	0	0	0	0	0	0	0	0	1.2401	1.27947	0	4.48719	RNASEQ: Yuon_chou_37507442_deg_day14, MICROARRAY: Pietrzyk_24194948_down_day28, EXOMESEQ: Luo_36514862_eqtl
IL1R2	0	0	1.25219	1.54399	0	0	0	0	0	0	0	0	0	0	0	1.33348	0	0	0	1.53004	0	0	0	0	0	0	0	0	1.23256	0	0	4.30659	EXOMESEQ: Luo_36514862_eqtl, RNASEQ: Yuon_chou_37507442_deg_cord, MICROARRAY: Pietrzyk_24194948_up_day5
CD2	0	0	1.25219	0	0	0	0	0	0	0	0	0	0	0	0	0	1.76988	1.49606	0	0	0	0	0	0	0	0	1.15064	0	1.2247	1.25529	0	4.27736	EXOMESEQ: Li_26030808, RNASEQ: Yuon_chou_37507442_deg_day14, MICROARRAY: Pietrzyk_24194948_down_day28
CHIT1	0	0	1.25219	1.54399	0	0	0	0	0	0	0	0	1.38749	0	0	0	0	0	0	0	0	0	0	0	0	0	0	0	1.34127	0	0	4.27275	MICROARRAY: Bharracharya_22723293, EXOMESEQ: Luo_36514862_eqtl, RNASEQ: Yuon_chou_37507442_deg_cord
FBN1	0	0	0	1.54399	0	0	0	0	0	0	0	0	0	0	0	0	0	0	0	1.53157	0	0	0	0	0	0	1.16801	0	0	0	0	4.24358	MICROARRAY: Pietrzyk_24194948_up_day5, EXOMESEQ: Luo_36514862_eqtl, RNASEQ: Yuon_chou_37507442_cpg_day14
GPA33	0	0	1.25219	0	0	0	0	0	0	0	0	0	0	0	0	0	1.64206	0	0	0	0	0	0	0	0	0	0	0	1.32614	1.29658	0	4.22039	EXOMESEQ: Li_26030808, RNASEQ: Yuon_chou_37507442_deg_cord, MICROARRAY: Pietrzyk_24194948_down_day28
RCAN3	0	0	1.25219	0	0	0	0	0	0	0	0	0	0	0	0	0	1.65091	0	0	1.52959	0	0	0	0	0	0	1.16527	0	0	1.28207	0	4.18517	EXOMESEQ: Li_26030808, MICROARRAY: Pietrzyk_24194948_down_day28, RNASEQ: Yuon_chou_37507442_deg_day14
HBG1	0	0	0	0	0	0	0	0	0	0	1.38751	1.47241	0	0	1.31071	0	0	0	0	0	0	0	0	0	0	0	0	0	1.40178	1.28966	0	4.1849	MASS_SPEC: Zasada_31445514_day36GA, RNASEQ: Yuon_chou_37507442_deg_cord, MICROARRAY: Fulton_30459472
CD177	0	0	0	1.54399	0	0	0	0	0	0	0	0	1.38749	0	0	0	0	0	0	0	0	0	0	1.23713	0	0	0	0	0	0	0	4.16861	MICROARRAY: Bharracharya_22723293, EXOMESEQ: Luo_36514862_eqtl, RNASEQ: Oji_mmuo_33177681_mRNA
AK5	0	0	1.25219	0	0	0	0	0	0	0	0	0	0	0	0	0	1.61875	0	0	1.52976	0	0	0	0	0	0	0	0	0	1.26224	0	4.13317	EXOMESEQ: Li_26030808, MICROARRAY: Pietrzyk_24194948_down_day28, RNASEQ: Yuon_chou_37507442_deg_day14
CHI3L2	0	0	1.25219	0	0	0	0	0	0	0	0	0	0	0	0	0	0	0	0	1.52965	0	0	0	0	0	0	0	0	1.22721	1.27673	0	4.05856	EXOMESEQ: Li_26030808, RNASEQ: Yuon_chou_37507442_deg_day14, MICROARRAY: Pietrzyk_24194948_up_day5
LY9	0	0	1.25219	0	0	0	0	0	0	0	0	0	0	0	0	0	0	0	0	1.52967	0	0	0	0	0	0	0	0	1.23311	0	0	4.01497	EXOMESEQ: Li_26030808, RNASEQ: Yuon_chou_37507442_deg_cord, MICROARRAY: Pietrzyk_24194948_up_day5
LDLRAP1	0	0	1.25219	0	0	0	0	0	0	0	0	0	0	0	0	0	0	0	0	1.52964	0	0	0	0	0	0	1.16706	0	1.22777	0	0	4.0096	EXOMESEQ: Li_26030808, RNASEQ: Yuon_chou_37507442_deg_cord, MICROARRAY: Pietrzyk_24194948_up_day5
RRM2	0	0	1.25219	0	0	0	0	0	0	0	0	0	1.38749	0	0	0	0	0	0	0	0	0	0	0	0	0	0	1.14617	1.35915	1.30623	0	3.99883	MICROARRAY: Bharracharya_22723293, EXOMESEQ: Li_26030808, RNASEQ: Yuon_chou_37507442_deg_cord
FCRLA	0	0	1.25219	0	0	0	0	0	0	0	0	0	0	0	0	1.48373	0	0	0	0	0	0	0	0	0	0	0	0	1.23015	1.24974	0	3.98565	EXOMESEQ: Li_26030808, RNASEQ: Yuon_chou_37507442_deg_day14, MICROARRAY: Gong_32412065
RALGPS2	0	0	1.25219	0	0	0	0	0	0	0	0	0	0	0	0	1.4859	0	0	0	0	0	0	0	0	0	0	0	0	0	1.24176	0	3.97984	EXOMESEQ: Li_26030808, MICROARRAY: Gong_32412065, RNASEQ: Yuon_chou_37507442_deg_day14
AFF3	0	0	1.25219	0	0	0	0	0	0	0	0	0	0	0	0	1.46937	0	0	0	0	0	0	0	0	0	0	0	0	1.23064	0	0	3.9522	EXOMESEQ: Li_26030808, RNASEQ: Yuon_chou_37507442_deg_cord, MICROARRAY: Gong_32412065
SUSD4	0	0	1.25219	0	0	0	0	0	0	0	0	0	0	0	0	1.3395	0	0	0	0	0	0	0	0	0	0	0	0	1.35043	0	0	3.94212	EXOMESEQ: Li_26030808, RNASEQ: Yuon_chou_37507442_deg_cord, MICROARRAY: Gong_32412065
SPOCD1	0	0	1.25219	0	0	0	0	0	0	0	0	0	0	0	0	1.33219	0	0	0	0	0	0	0	0	0	0	0	1.33868	0	0	0	3.92306	EXOMESEQ: Li_26030808, MICROARRAY: Gong_32412065, RNASEQ: Yuon_chou_37507442_cpg_day28
FCRL2	0	0	1.25219	0	0	0	0	0	0	0	0	0	0	0	0	1.50197	0	0	0	0	0	0	0	0	0	0	1.15614	0	0	0	0	3.9103	EXOMESEQ: Li_26030808, MICROARRAY: Gong_32412065, RNASEQ: Yuon_chou_37507442_cpg_day14
DEPDC1	0	0	1.25219	0	0	0	0	0	0	0	0	0	1.38749	0	0	0	0	0	0	0	0	0	0	0	0	0	0	0	1.26853	0	0	3.90821	MICROARRAY: Bharracharya_22723293, EXOMESEQ: Li_26030808, RNASEQ: Yuon_chou_37507442_deg_cord
PTGFRN	0	0	1.25219	0	0	0	0	0	0	0	0	0	0	0	0	0	0	1.49611	0	0	0	0	0	0	0	0	1.1533	0	0	0	0	3.90159	EXOMESEQ: Li_26030808, MICROARRAY: Pietrzyk_24194948_down_day5, RNASEQ: Yuon_chou_37507442_cpg_day14
IQGAP3	0	0	1.25219	0	0	0	0	0	0	0	0	0	1.38749	0	0	0	0	0	0	0	0	0	0	0	0	0	0	0	1.2433	0	0	3.88298	MICROARRAY: Bharracharya_22723293, EXOMESEQ: Li_26030808, RNASEQ: Yuon_chou_37507442_deg_cord
BUB1	0	0	1.25219	0	0	0	0	0	0	0	0	0	1.38749	0	0	0	0	0	0	0	0	0	0	0	0	0	0	0	1.23443	0	0	3.8741	MICROARRAY: Bharracharya_22723293, EXOMESEQ: Li_26030808, RNASEQ: Yuon_chou_37507442_deg_cord
SLC44A5	0	0	1.25219	0	0	0	0	0	0	0	0	0	1.38749	0	0	0	0	0	0	0	0	0	0	0	0	0	0	0	1.22247	0	0	3.86214	MICROARRAY: Bharracharya_22723293, EXOMESEQ: Li_26030808, RNASEQ: Yuon_chou_37507442_deg_cord
ASPM	0	0	1.25219	0	0	0	0	0	0	0	0	0	1.38749	0	0	0	0	0	0	0	0	0	0	0	0	0	1.15894	1.14643	1.21474	0	0	3.85441	MICROARRAY: Bharracharya_22723293, EXOMESEQ: Li_26030808, RNASEQ: Yuon_chou_37507442_deg_cord
CD1C	0	0	1.25219	0	0	0	0	0	0	0	0	0	0	0	0	1.3326	0	0	0	0	0	0	0	0	0	0	0	0	1.25932	1.25619	0	3.84411	EXOMESEQ: Li_26030808, RNASEQ: Yuon_chou_37507442_deg_cord, MICROARRAY: Gong_32412065
NFIA	0	0	1.25219	0	0	0	0	0	0	0	0	0	0	0	1.31071	0	0	0	0	0	0	0	0	0	0	0	0	0	1.26913	1.23837	0	3.83203	EXOMESEQ: Li_26030808, RNASEQ: Yuon_chou_37507442_deg_cord, MICROARRAY: Fulton_30459472
CENPA	0	0	1.25219	0	0	0	0	0	0	0	0	0	1.38749	0	0	0	0	0	0	0	0	0	0	0	0	0	1.17122	0	0	0	0	3.81089	MICROARRAY: Bharracharya_22723293, EXOMESEQ: Li_26030808, RNASEQ: Yuon_chou_37507442_cpg_day14
IL1RL1	0	0	1.25219	0	0	0	0	0	0	0	0	0	1.38749	0	0	0	0	0	0	0	0	0	0	0	0	0	1.16567	0	0	0	0	3.80535	MICROARRAY: Bharracharya_22723293, EXOMESEQ: Li_26030808, RNASEQ: Yuon_chou_37507442_cpg_day14
KIF14	0	0	1.25219	0	0	0	0	0	0	0	0	0	1.38749	0	0	0	0	0	0	0	0	0	0	0	0	0	1.16425	0	0	0	0	3.80392	MICROARRAY: Bharracharya_22723293, EXOMESEQ: Li_26030808, RNASEQ: Yuon_chou_37507442_cpg_day14
PDGFD	0	1.22591	0	0	0	0	0	0	0	0	0	0	0	0	1.31071	1.36083	0	0	0	0	0	0	0	0	0	0	0	0	1.21705	0	0	3.80379	EXOMESEQ: Hamvas_30342483, RNASEQ: Yuon_chou_37507442_deg_cord, MICROARRAY: Gong_32412065
C1orf115	0	0	1.25219	0	0	0	0	0	0	0	0	0	0	0	1.31071	0	0	0	0	0	0	0	0	0	0	0	0	0	1.23901	0	0	3.8019	EXOMESEQ: Li_26030808, RNASEQ: Yuon_chou_37507442_deg_cord, MICROARRAY: Fulton_30459472
PCNX2	0	0	1.25219	0	0	0	0	0	0	0	0	0	0	0	0	0	0	0	0	0	0	1.29875	0	0	0	0	0	0	0	1.24947	0	3.80041	EXOMESEQ: Li_26030808, MICROARRAY: Windhorst_37090732, RNASEQ: Yuon_chou_37507442_deg_day14
PHC2	0	0	1.25219	0	0	0	0	0	0	0	0	0	0	0	0	0	0	0	0	0	0	1.29875	0	0	0	0	0	0	1.24143	0	0	3.79237	EXOMESEQ: Li_26030808, RNASEQ: Yuon_chou_37507442_deg_cord, MICROARRAY: Windhorst_37090732
S1PR1	0	0	1.25219	0	0	0	0	0	0	0	0	0	0	0	1.31071	0	0	0	0	0	0	0	0	0	0	0	0	0	1.22316	0	0	3.78606	EXOMESEQ: Li_26030808, RNASEQ: Yuon_chou_37507442_deg_cord, MICROARRAY: Fulton_30459472
PLA2G2A	0	0	1.25219	0	0	0	0	0	0	0	0	0	1.38749	0	0	0	0	0	0	0	0	0	0	0	0	0	0	1.14451	0	0	0	3.78418	MICROARRAY: Bharracharya_22723293, EXOMESEQ: Li_26030808, RNASEQ: Yuon_chou_37507442_cpg_day28
ACTN2	0	0	1.25219	0	0	0	0	0	0	0	0	0	0	0	0	0	0	0	0	0	0	1.29875	0	0	0	0	0	0	1.23196	0	0	3.7829	EXOMESEQ: Li_26030808, RNASEQ: Yuon_chou_37507442_deg_cord, MICROARRAY: Windhorst_37090732
ZBTB40	0	0	1.25219	0	0	0	0	0	0	0	0	0	0	0	0	0	0	0	0	0	0	1.29875	0	0	0	0	0	0	1.22992	0	0	3.78087	EXOMESEQ: Li_26030808, RNASEQ: Yuon_chou_37507442_deg_cord, MICROARRAY: Windhorst_37090732
CD52	0	0	1.25219	0	0	0	0	0	0	0	0	0	0	0	0	0	0	0	0	0	0	1.29875	0	0	0	0	0	0	1.22022	0	0	3.77116	EXOMESEQ: Li_26030808, RNASEQ: Yuon_chou_37507442_deg_cord, MICROARRAY: Windhorst_37090732
IL23R	0	0	1.25219	0	0	0	0	0	0	0	0	0	0	0	0	1.33301	0	0	0	0	0	0	0	0	0	0	1.15836	0	0	0	0	3.74356	EXOMESEQ: Li_26030808, MICROARRAY: Gong_32412065, RNASEQ: Yuon_chou_37507442_cpg_day14
TGFA	0	0	1.25219	0	0	0	0	0	0	0	0	0	0	1.33314	0	0	0	0	0	0	0	0	0	0	0	0	1.15417	0	0	0	0	3.7395	EXOMESEQ: Li_26030808, MICROARRAY: Da_paepe_20718599, RNASEQ: Yuon_chou_37507442_cpg_day14
IFNLR1	0	0	1.25219	0	0	0	0	0	0	0	0	0	0	0	0	1.3348	0	0	0	0	0	0	0	0	0	0	0	1.14746	0	0	0	3.73444	EXOMESEQ: Li_26030808, MICROARRAY: Gong_32412065, RNASEQ: Yuon_chou_37507442_cpg_day28
ALPL	0	0	1.25219	0	0	0	0	0	0	0	0	0	0	0	1.31071	0	0	0	0	0	0	0	0	0	0	0	1.17035	1.14567	0	0	0	3.73324	EXOMESEQ: Li_26030808, MICROARRAY: Fulton_30459472, RNASEQ: Yuon_chou_37507442_cpg_day14
CNRIP1	0	0	1.25219	0	0	0	0	0	0	0	0	0	0	0	0	1.33296	0	0	0	0	0	0	0	0	0	0	1.14769	0	0	0	0	3.73284	EXOMESEQ: Li_26030808, MICROARRAY: Gong_32412065, RNASEQ: Yuon_chou_37507442_cpg_day14
CACNA1E	0	0	1.25219	0	0	0	0	0	0	0	0	0	0	0	0	1.33312	0	0	0	0	0	0	0	0	0	0	0	1.14369	0	0	0	3.729	EXOMESEQ: Li_26030808, MICROARRAY: Gong_32412065, RNASEQ: Yuon_chou_37507442_cpg_day28
PADI2	0	0	1.25219	0	0	0	0	0	0	0	0	0	0	0	0	0	0	0	0	0	0	1.29875	0	0	0	0	1.15695	0	0	0	0	3.70789	EXOMESEQ: Li_26030808, MICROARRAY: Windhorst_37090732, RNASEQ: Yuon_chou_37507442_cpg_day14
FGFR3	1.22988	0	0	0	0	0	0	0	0	0	0	0	0	1.33314	0	0	0	0	0	0	0	0	0	0	0	0	0	1.14458	0	0	0	3.7076	EXOMESEQ: Dai_34276789_data, MICROARRAY: Da_paepe_20718599, RNASEQ: Yuon_chou_37507442_cpg_day28
CDC14A	0	0	1.25219	0	0	0	0	0	0	0	0	0	0	0	0	0	0	0	0	0	0	1.29875	0	0	0	0	0	1.14681	0	0	0	3.69776	EXOMESEQ: Li_26030808, MICROARRAY: Windhorst_37090732, RNASEQ: Yuon_chou_37507442_cpg_day28
AK2	0	0	1.25219	0	0	0	0	0	0	0	0	0	0	0	0	0	0	0	0	0	0	1.29875	0	0	0	0	0	1.14532	0	0	0	3.69626	EXOMESEQ: Li_26030808, MICROARRAY: Windhorst_37090732, RNASEQ: Yuon_chou_37507442_cpg_day28
HIVEP3	0	0	1.25219	0	0	0	0	0	1.21558	0	0	0	0	0	0	0	0	0	0	0	0	0	0	0	0	0	1.16778	0	0	0	0	3.63555	EXOMESEQ: Li_26030808, GWAS: Wang_23897914, RNASEQ: Yuon_chou_37507442_cpg_day14
MPO	0	0	0	1.54399	0	0	0	0	0	0	0	0	0	0	0	0	0	0	0	1.63402	0	0	0	0	0	0	0	0	0	0	0	3.17802	MICROARRAY: Pietrzyk_24194948_up_day5, EXOMESEQ: Luo_36514862_eqtl
CD24	0	0	0	1.54399	0	0	0	0	0	0	0	0	0	0	0	0	0	0	0	1.52992	0	0	0	0	0	0	0	0	0	0	0	3.07391	MICROARRAY: Pietrzyk_24194948_up_day5, EXOMESEQ: Luo_36514862_eqtl
ITGA9	0	0	0	1.54399	0	0	0	0	0	0	0	0	0	0	0	0	0	0	0	1.52977	0	0	0	0	0	0	0	0	0	0	0	3.07376	MICROARRAY: Pietrzyk_24194948_up_day5, EXOMESEQ: Luo_36514862_eqtl
CD28	0	0	0	0	0	0	0	0	0	0	0	0	0	0	0	0	1.75827	1.73096	0	0	0	0	0	0	0	0	1.16301	0	1.22694	1.28399	0	3.04226	RNASEQ: Yuon_chou_37507442_deg_day14, MICROARRAY: Pietrzyk_24194948_down_day28
ICOS	0	0	0	0	0	0	0	0	0	0	0	0	0	0	0	0	1.79726	1.79846	0	0	0	0	0	0	0	0	0	0	1.23975	0	0	3.03821	RNASEQ: Yuon_chou_37507442_deg_cord, MICROARRAY: Pietrzyk_24194948_down_day5
UBASH3A	0	0	0	0	0	0	0	0	0	0	0	0	0	0	0	0	1.74783	0	0	1.52966	0	0	0	0	0	0	0	0	1.24801	1.27603	0	3.02387	RNASEQ: Yuon_chou_37507442_deg_day14, MICROARRAY: Pietrzyk_24194948_down_day28
ITK	0	0	0	0	0	0	0	0	0	0	0	0	0	0	0	0	1.73842	0	0	0	0	0	0	0	0	0	0	0	1.23505	1.27687	0	3.01529	RNASEQ: Yuon_chou_37507442_deg_day14, MICROARRAY: Pietrzyk_24194948_down_day28
TRAT1	0	0	0	0	0	0	0	0	0	0	0	0	0	0	0	0	1.78282	0	0	0	0	0	0	0	0	0	0	0	1.22354	0	0	3.00636	RNASEQ: Yuon_chou_37507442_deg_cord, MICROARRAY: Pietrzyk_24194948_down_day28
EML6	0	0	1.25219	0	0	0	0	1.7466	0	0	0	0	0	0	0	0	0	0	0	0	0	0	0	0	0	0	0	0	0	0	0	2.99879	GWAS: Torgerson_30113228, EXOMESEQ: Li_26030808
NBL1	0	0	0	0	0	0	0	1.83528	0	0	0	0	0	0	0	0	0	0	0	0	0	0	0	0	0	0	0	1.14671	0	0	0	2.98199	GWAS: Torgerson_30113228, RNASEQ: Yuon_chou_37507442_cpg_day28
GNLY	0	0	1.25219	0	0	0	0	0	0	0	0	0	0	0	0	0	0	0	0	0	0	0	0	0	0	0	1.14709	1.14385	0	0	1.71571	2.9679	EXOMESEQ: Li_26030808, RNASEQ: Yuon_chou_37507442_deg_day28
DPP4	0	0	0	0	0	0	0	0	0	0	0	0	0	0	0	0	1.72222	0	0	0	0	0	0	0	0	0	0	0	1.24119	0	0	2.96341	RNASEQ: Yuon_chou_37507442_deg_cord, MICROARRAY: Pietrzyk_24194948_down_day28
SH2D1A	0	0	0	0	0	0	0	0	0	0	0	0	0	0	0	0	1.70885	1.52014	0	0	0	0	0	0	0	0	0	0	1.2432	0	0	2.95205	RNASEQ: Yuon_chou_37507442_deg_cord, MICROARRAY: Pietrzyk_24194948_down_day28
CD96	0	0	0	0	0	0	0	0	0	0	0	0	0	0	0	0	1.67295	1.49708	0	0	0	0	0	0	0	0	0	0	1.23991	1.27729	0	2.95024	RNASEQ: Yuon_chou_37507442_deg_day14, MICROARRAY: Pietrzyk_24194948_down_day28
SIRPG	0	0	0	0	0	0	0	0	0	0	0	0	0	0	0	0	1.6882	1.5271	0	0	0	0	0	0	0	0	0	0	1.26184	0	0	2.95005	RNASEQ: Yuon_chou_37507442_deg_cord, MICROARRAY: Pietrzyk_24194948_down_day28
TRABD2A	0	0	1.25219	0	0	0	0	0	0	0	0	0	0	0	0	0	1.68399	0	0	1.52972	0	0	0	0	0	0	0	0	0	0	0	2.93617	EXOMESEQ: Li_26030808, MICROARRAY: Pietrzyk_24194948_down_day28
B4GALT5	0	0	0	0	0	0	0	0	0	0	0	0	0	0	0	0	0	0	0	1.52978	0	0	0	0	0	0	0	0	1.40537	0	0	2.93515	RNASEQ: Yuon_chou_37507442_deg_cord, MICROARRAY: Pietrzyk_24194948_up_day5
SPOCK2	0	0	0	0	0	0	1.70414	0	0	0	0	0	0	0	0	0	0	0	0	0	0	0	0	0	0	0	0	0	1.22782	0	0	2.93196	RNASEQ: Yuon_chou_37507442_deg_cord, GWAS: Hadchoul_data
CEACAM6	0	0	0	1.54399	0	0	0	0	0	0	0	0	1.38749	0	0	0	0	0	0	0	0	0	0	0	0	0	0	0	0	0	0	2.93148	MICROARRAY: Bharracharya_22723293, EXOMESEQ: Luo_36514862_eqtl
CD247	0	0	0	0	0	0	0	0	0	0	0	0	0	0	0	0	1.64861	0	0	0	0	0	0	0	0	0	0	0	1.22302	1.28145	0	2.93006	RNASEQ: Yuon_chou_37507442_deg_day14, MICROARRAY: Pietrzyk_24194948_down_day28
SAMD3	0	0	0	0	0	0	0	0	0	0	0	0	0	0	0	0	1.63195	0	0	0	0	0	0	0	0	0	0	0	1.24208	1.29282	0	2.92478	RNASEQ: Yuon_chou_37507442_deg_day14, MICROARRAY: Pietrzyk_24194948_down_day28
RASGRP1	0	0	0	0	0	0	0	0	0	0	0	0	0	0	0	0	1.61508	0	0	0	0	0	0	0	0	0	0	0	1.22342	1.29497	0	2.91005	RNASEQ: Yuon_chou_37507442_deg_day14, MICROARRAY: Pietrzyk_24194948_down_day28
ITM2A	0	0	0	0	0	0	0	0	0	0	0	0	0	0	0	0	1.65329	0	0	0	0	0	0	0	0	0	0	0	1.2559	1.24365	0	2.90918	RNASEQ: Yuon_chou_37507442_deg_cord, MICROARRAY: Pietrzyk_24194948_down_day28
GALT	0	0	0	0	0	0	0	0	0	0	0	0	0	0	0	0	0	1.67851	0	0	0	0	0	0	0	0	0	0	1.22932	0	0	2.90783	RNASEQ: Yuon_chou_37507442_deg_cord, MICROARRAY: Pietrzyk_24194948_down_day5
CCNI2	0	0	0	0	0	0	0	0	0	0	0	0	0	0	0	0	1.67639	0	0	0	0	0	0	0	0	0	0	0	1.22439	0	0	2.90079	RNASEQ: Yuon_chou_37507442_deg_cord, MICROARRAY: Pietrzyk_24194948_down_day28
IGF2BP1	0	0	0	0	0	0	0	0	0	0	0	0	0	0	0	0	0	0	1.20585	1.73576	0	0	0	0	0	0	1.16252	0	0	0	0	2.89828	MICROARRAY: Pietrzyk_24194948_up_day5, RNASEQ: Yuon_chou_37507442_cpg_day14
ABCD2	0	0	0	0	0	0	0	0	0	0	0	0	0	0	0	0	1.68006	0	0	1.52958	0	0	0	0	0	0	0	0	1.21713	0	0	2.89719	RNASEQ: Yuon_chou_37507442_deg_cord, MICROARRAY: Pietrzyk_24194948_down_day28
THEMIS	0	0	0	0	0	0	0	0	0	0	0	0	1.38749	0	0	0	1.66971	0	0	0	0	0	0	0	0	0	1.16394	0	1.22512	0	0	2.89483	MICROARRAY: Pietrzyk_24194948_down_day28, RNASEQ: Yuon_chou_37507442_deg_cord
CD27	0	0	0	0	0	0	0	0	0	0	0	0	0	0	0	0	1.63997	0	0	0	0	0	0	0	0	0	0	0	1.24677	0	0	2.88673	RNASEQ: Yuon_chou_37507442_deg_cord, MICROARRAY: Pietrzyk_24194948_down_day28
TRBC1	0	0	0	0	0	0	0	0	0	0	0	0	0	0	0	0	1.61145	0	0	0	0	0	0	0	0	0	0	0	1.23507	1.26674	0	2.87819	RNASEQ: Yuon_chou_37507442_deg_day14, MICROARRAY: Pietrzyk_24194948_down_day28
TC2N	0	0	0	0	0	0	0	0	0	0	0	0	0	0	0	0	1.62245	0	0	0	0	0	0	0	0	0	0	0	1.24151	1.25449	0	2.87694	RNASEQ: Yuon_chou_37507442_deg_day14, MICROARRAY: Pietrzyk_24194948_down_day28
SETMAR	0	0	0	0	0	0	0	0	0	0	0	0	0	0	0	0	1.65829	0	0	0	0	0	0	0	0	0	0	0	1.21646	0	0	2.87475	RNASEQ: Yuon_chou_37507442_deg_cord, MICROARRAY: Pietrzyk_24194948_down_day28
OXCT1	0	0	0	0	0	0	0	0	0	0	0	0	0	0	0	0	1.56346	0	0	0	0	0	0	0	0	0	0	0	1.30454	0	0	2.868	RNASEQ: Yuon_chou_37507442_deg_cord, MICROARRAY: Pietrzyk_24194948_down_day28
MGAT4A	0	0	1.25219	0	0	0	0	0	0	0	0	0	0	0	0	0	1.61326	0	0	0	0	0	0	0	0	0	0	0	0	0	0	2.86545	EXOMESEQ: Li_26030808, MICROARRAY: Pietrzyk_24194948_down_day28
DHRS4	0	0	0	0	0	0	0	0	0	0	0	0	0	0	0	0	0	1.63777	0	0	0	0	0	0	0	0	0	0	1.22743	0	0	2.8652	RNASEQ: Yuon_chou_37507442_deg_cord, MICROARRAY: Pietrzyk_24194948_down_day5
RIMBP2	0	0	0	0	0	0	0	1.71704	0	0	0	0	0	0	0	0	0	0	0	0	0	0	0	0	0	0	0	1.14678	0	0	0	2.86382	GWAS: Torgerson_30113228, RNASEQ: Yuon_chou_37507442_cpg_day28
LEF1	0	0	0	0	0	0	0	0	0	0	0	0	0	0	1.31071	0	1.6359	0	0	0	0	0	0	0	0	0	0	0	1.22259	0	0	2.85849	RNASEQ: Yuon_chou_37507442_deg_cord, MICROARRAY: Pietrzyk_24194948_down_day28
CLEC2B	0	0	0	0	0	0	0	0	0	0	0	0	0	0	0	0	1.62432	0	0	0	0	0	0	1.23121	0	0	0	0	0	0	0	2.85553	RNASEQ: Oji_mmuo_33177681_mRNA, MICROARRAY: Pietrzyk_24194948_down_day28
ATP8B4	0	0	0	1.54399	0	0	0	0	0	0	0	0	0	0	1.31071	0	0	0	0	0	0	0	0	0	0	0	0	0	0	0	0	2.8547	MICROARRAY: Fulton_30459472, EXOMESEQ: Luo_36514862_eqtl
CTSO	0	0	0	0	0	0	0	0	0	0	0	0	0	0	0	0	1.61691	0	0	1.52963	0	0	0	0	0	0	0	0	1.23501	0	0	2.85192	RNASEQ: Yuon_chou_37507442_deg_cord, MICROARRAY: Pietrzyk_24194948_down_day28
EDAR	0	0	1.25219	0	0	0	0	0	0	0	0	0	0	0	0	0	1.59889	1.51053	0	0	0	0	0	0	0	0	0	0	0	0	0	2.85107	EXOMESEQ: Li_26030808, MICROARRAY: Pietrzyk_24194948_down_day28
GCSAM	0	0	0	0	0	0	0	0	0	0	0	0	0	0	0	0	1.59532	0	0	1.52975	0	0	0	0	0	0	0	0	1.25141	0	0	2.84674	RNASEQ: Yuon_chou_37507442_deg_cord, MICROARRAY: Pietrzyk_24194948_down_day28
LEPROTL1	0	0	0	0	0	0	0	0	0	0	0	0	0	0	0	0	1.69275	0	0	0	0	0	0	0	0	0	1.15383	0	0	0	0	2.84658	RNASEQ: Yuon_chou_37507442_cpg_day14, MICROARRAY: Pietrzyk_24194948_down_day28
IGLL5	0	0	0	0	0	0	0	0	0	0	0	1.44302	0	0	0	1.40235	0	0	0	0	0	0	0	0	0	0	0	0	0	0	0	2.84537	MICROARRAY: Gong_32412065, MASS_SPEC: Zasada_31445514_day36GA
RETREG1	0	0	0	0	0	0	0	0	0	0	0	0	0	0	0	0	1.59177	1.49661	0	0	0	0	0	0	0	0	0	0	0	1.25318	0	2.84495	MICROARRAY: Pietrzyk_24194948_down_day28, RNASEQ: Yuon_chou_37507442_deg_day14
STYX	0	0	0	0	0	0	0	0	0	0	0	0	0	0	0	0	1.69767	0	0	0	0	0	0	0	0	0	0	1.14618	0	0	0	2.84385	RNASEQ: Yuon_chou_37507442_cpg_day28, MICROARRAY: Pietrzyk_24194948_down_day28
IL7R	0	0	0	0	0	0	0	0	0	0	0	0	0	0	0	0	1.57406	0	0	0	0	0	0	0	0	0	0	0	1.26943	1.25635	0	2.84349	RNASEQ: Yuon_chou_37507442_deg_cord, MICROARRAY: Pietrzyk_24194948_down_day28
CEP192	0	0	0	1.54399	0	0	0	0	0	0	0	0	0	0	0	0	0	0	0	0	0	1.29875	0	0	0	0	0	0	0	0	0	2.84275	MICROARRAY: Windhorst_37090732, EXOMESEQ: Luo_36514862_eqtl
MGAM	0	0	0	1.54399	0	0	0	0	0	0	0	0	0	0	0	0	0	0	0	0	0	1.29875	0	0	0	0	0	0	0	0	0	2.84275	MICROARRAY: Windhorst_37090732, EXOMESEQ: Luo_36514862_eqtl
NTNG2	0	0	0	0	0	0	0	0	0	0	0	0	0	0	0	0	0	0	0	1.53666	0	0	0	0	0	0	0	0	1.22814	1.30166	0	2.83833	RNASEQ: Yuon_chou_37507442_deg_day14, MICROARRAY: Pietrzyk_24194948_up_day5
TMEM204	0	0	0	0	0	0	0	0	0	0	0	0	0	0	0	0	1.57759	0	0	1.52964	0	0	0	0	0	0	0	0	1.22221	1.25481	0	2.8324	RNASEQ: Yuon_chou_37507442_deg_day14, MICROARRAY: Pietrzyk_24194948_down_day28
HOOK1	0	0	1.25219	0	0	0	0	0	0	0	0	0	0	0	0	0	1.57583	0	0	0	0	0	0	0	0	0	0	0	0	0	0	2.82801	EXOMESEQ: Li_26030808, MICROARRAY: Pietrzyk_24194948_down_day28
RFWD3	0	0	0	1.54399	0	0	0	0	0	0	0	0	0	0	0	0	0	0	0	0	0	0	0	0	0	0	0	0	0	1.28383	0	2.82782	EXOMESEQ: Luo_36514862_eqtl, RNASEQ: Yuon_chou_37507442_deg_day14
BCL11B	0	0	0	0	0	0	0	0	0	0	0	0	0	0	0	0	1.59355	0	0	0	0	0	0	0	0	0	0	0	1.23316	0	0	2.8267	RNASEQ: Yuon_chou_37507442_deg_cord, MICROARRAY: Pietrzyk_24194948_down_day28
ANKRD27	0	0	0	1.54399	0	0	0	0	0	0	0	0	0	0	0	0	0	0	0	0	0	0	0	0	0	0	0	0	0	1.27701	0	2.821	EXOMESEQ: Luo_36514862_eqtl, RNASEQ: Yuon_chou_37507442_deg_day14
HP	0	0	0	0	0	0	0	0	0	0	1.38984	1.52138	0	0	0	0	0	0	0	0	0	0	0	0	0	0	0	0	1.29743	0	0	2.81881	MASS_SPEC: Zasada_31445514_day36GA, RNASEQ: Yuon_chou_37507442_deg_cord
TBC1D4	0	0	0	0	0	0	0	0	0	0	0	0	0	0	0	0	0	0	0	1.52956	0	0	0	0	0	0	0	0	1.24291	1.28531	0	2.81487	RNASEQ: Yuon_chou_37507442_deg_day14, MICROARRAY: Pietrzyk_24194948_up_day5
IFIT1	0	0	0	1.54399	0	0	0	0	0	0	0	0	0	0	0	0	0	0	0	0	0	0	0	0	0	0	0	0	0	1.26447	0	2.80846	EXOMESEQ: Luo_36514862_eqtl, RNASEQ: Yuon_chou_37507442_deg_day14
RGL4	0	0	0	0	0	0	0	0	0	0	0	0	0	0	0	0	0	0	0	1.52981	0	0	0	0	0	0	0	0	0	1.27815	0	2.80796	MICROARRAY: Pietrzyk_24194948_up_day5, RNASEQ: Yuon_chou_37507442_deg_day14
YY1AP1	0	0	1.25219	1.54399	0	0	0	0	0	0	0	0	0	0	0	0	0	0	0	0	0	0	0	0	0	0	0	0	0	1.2486	0	2.7926	EXOMESEQ: Luo_36514862_eqtl, RNASEQ: Yuon_chou_37507442_deg_day14
QSOX2	0	0	0	0	0	0	0	0	0	0	0	0	0	0	0	1.49489	0	0	0	0	0	0	0	0	0	0	0	0	0	1.29719	0	2.79208	MICROARRAY: Gong_32412065, RNASEQ: Yuon_chou_37507442_deg_day14
CD44	0	0	0	0	0	1.3012	0	0	0	0	0	1.4871	0	0	0	0	0	0	0	0	0	0	0	0	0	0	0	0	0	0	0	2.7883	GWAS: Ambalavanan_25449221, MASS_SPEC: Zasada_31445514_day36GA
SDAD1	0	0	0	0	0	0	0	0	0	0	0	0	0	0	0	0	1.55639	0	0	0	0	0	0	0	0	0	0	0	1.23159	0	0	2.78799	RNASEQ: Yuon_chou_37507442_deg_cord, MICROARRAY: Pietrzyk_24194948_down_day28
TESPA1	0	0	0	0	0	0	0	0	0	0	0	0	0	0	0	0	1.57052	0	0	0	0	0	0	0	0	0	1.16724	0	1.21626	0	0	2.78678	RNASEQ: Yuon_chou_37507442_deg_cord, MICROARRAY: Pietrzyk_24194948_down_day28
UGCG	0	0	0	1.54399	0	0	0	0	0	0	0	0	0	0	0	0	0	0	0	0	0	0	0	0	0	0	0	0	1.24196	0	0	2.78595	RNASEQ: Yuon_chou_37507442_deg_cord, EXOMESEQ: Luo_36514862_eqtl
LMO7	0	0	0	1.54399	0	0	0	0	0	0	0	0	0	0	0	0	0	0	0	0	0	0	0	0	0	0	0	0	1.2218	1.24139	0	2.78538	RNASEQ: Yuon_chou_37507442_deg_day14, EXOMESEQ: Luo_36514862_eqtl
CRISP3	0	0	0	1.54399	0	0	0	0	0	0	0	0	0	0	0	0	0	0	0	0	0	0	0	0	0	0	0	0	1.23881	0	0	2.7828	RNASEQ: Yuon_chou_37507442_deg_cord, EXOMESEQ: Luo_36514862_eqtl
MBOAT2	0	0	1.25219	0	0	0	0	0	0	0	0	0	0	0	0	0	0	0	0	1.53026	0	0	0	0	0	0	0	0	0	0	0	2.78245	EXOMESEQ: Li_26030808, MICROARRAY: Pietrzyk_24194948_up_day5
MAN1C1	0	0	1.25219	0	0	0	0	0	0	0	0	0	0	0	0	0	0	0	0	1.52974	0	1.29875	0	0	0	0	0	0	0	0	0	2.78193	EXOMESEQ: Li_26030808, MICROARRAY: Pietrzyk_24194948_up_day5
TRAF3IP3	0	0	1.25219	0	0	0	0	0	0	0	0	0	0	0	0	0	0	0	0	1.52973	0	0	0	0	0	0	0	0	0	0	0	2.78191	EXOMESEQ: Li_26030808, MICROARRAY: Pietrzyk_24194948_up_day5
LRG1	0	0	0	0	0	0	0	0	0	0	1.38051	1.4773	0	0	0	0	0	0	0	0	0	1.29875	0	0	0	0	0	0	0	0	0	2.77606	MASS_SPEC: Zasada_31445514_day36GA, MICROARRAY: Windhorst_37090732
APOC2	0	0	0	0	0	0	0	0	0	0	1.38844	0	1.38749	0	0	0	0	0	0	0	0	0	0	0	0	0	0	0	0	0	0	2.77592	MASS_SPEC: Zasada_31445514, MICROARRAY: Bharracharya_22723293
SERPINA1	0	0	0	0	0	0	0	0	0	0	1.38657	0	1.38749	0	0	0	0	0	0	0	0	1.29875	0	0	0	0	0	0	0	0	0	2.77406	MASS_SPEC: Zasada_31445514, MICROARRAY: Bharracharya_22723293
ERG	0	0	0	1.54399	0	0	0	0	0	0	0	0	0	0	0	0	0	0	0	0	0	0	0	0	0	0	0	1.14494	1.22747	0	0	2.77146	RNASEQ: Yuon_chou_37507442_deg_cord, EXOMESEQ: Luo_36514862_eqtl
SEPTIN1	0	0	0	0	0	0	0	0	0	0	0	0	0	0	0	0	0	1.49682	0	0	0	0	0	0	0	0	0	0	1.27197	0	0	2.76878	RNASEQ: Yuon_chou_37507442_deg_cord, MICROARRAY: Pietrzyk_24194948_down_day5
GIMAP1	0	0	0	0	0	0	0	0	0	0	0	0	0	0	0	0	0	0	0	1.52959	0	0	0	0	0	0	0	0	1.23895	0	0	2.76854	RNASEQ: Yuon_chou_37507442_deg_cord, MICROARRAY: Pietrzyk_24194948_up_day5
CHMP7	0	0	0	0	0	0	0	0	0	0	0	0	0	0	0	0	0	0	0	1.52957	0	0	0	0	0	0	0	0	1.23705	0	0	2.76662	RNASEQ: Yuon_chou_37507442_deg_cord, MICROARRAY: Pietrzyk_24194948_up_day5
PLAAT4	0	0	0	0	0	0	0	0	0	0	0	0	0	0	0	0	0	1.49741	0	0	0	0	0	0	0	0	0	0	1.26824	0	0	2.76566	RNASEQ: Yuon_chou_37507442_deg_cord, MICROARRAY: Pietrzyk_24194948_down_day5
IGKC	0	0	0	0	0	0	0	0	0	1.29872	1.37725	0	1.38749	0	0	0	0	0	0	0	0	0	0	0	0	0	0	0	0	0	0	2.76474	MASS_SPEC: Zasada_31445514, MICROARRAY: Bharracharya_22723293
DAAM2	0	0	0	1.54399	0	0	0	0	0	0	0	0	0	0	0	0	0	0	0	0	0	0	0	0	0	0	0	0	1.21978	0	0	2.76377	RNASEQ: Yuon_chou_37507442_deg_cord, EXOMESEQ: Luo_36514862_eqtl
ABCA13	0	0	0	1.54399	0	0	0	0	0	0	0	0	0	0	0	0	0	0	0	0	0	0	0	0	0	0	0	0	1.21923	0	0	2.76322	RNASEQ: Yuon_chou_37507442_deg_cord, EXOMESEQ: Luo_36514862_eqtl
PLXDC1	0	0	0	0	0	0	0	0	0	0	0	0	0	0	0	0	0	0	0	1.52963	0	0	0	0	0	0	0	0	1.23035	0	0	2.75998	RNASEQ: Yuon_chou_37507442_deg_cord, MICROARRAY: Pietrzyk_24194948_up_day5
LPXN	0	0	0	0	0	0	0	0	0	0	0	0	0	0	0	0	0	1.53606	0	0	0	0	0	0	0	0	0	0	1.22377	0	0	2.75982	RNASEQ: Yuon_chou_37507442_deg_cord, MICROARRAY: Pietrzyk_24194948_down_day5
RIOX2	0	0	0	0	0	0	0	0	0	0	0	0	0	0	0	0	0	0	0	1.52961	0	0	0	0	0	0	0	0	1.22735	0	0	2.75696	RNASEQ: Yuon_chou_37507442_deg_cord, MICROARRAY: Pietrzyk_24194948_up_day5
ERVH48-1	0	0	0	0	0	0	0	0	0	0	0	0	0	0	0	0	1.58113	0	0	1.52968	0	0	0	0	0	0	1.16426	0	0	0	0	2.74539	MICROARRAY: Pietrzyk_24194948_down_day28, RNASEQ: Yuon_chou_37507442_cpg_day14
BTN3A2	0	0	0	0	0	0	0	0	0	0	0	0	0	0	0	0	0	0	0	1.52957	0	0	0	0	0	0	0	0	1.21448	0	0	2.74405	RNASEQ: Yuon_chou_37507442_deg_cord, MICROARRAY: Pietrzyk_24194948_up_day5
TF	0	0	0	0	0	0	0	0	0	0	0	1.52628	0	0	0	0	0	0	0	0	0	0	0	0	0	0	0	0	1.21589	0	0	2.74217	RNASEQ: Yuon_chou_37507442_deg_cord, MASS_SPEC: Zasada_31445514_day36GA
LGALS3BP	0	0	0	0	0	0	0	0	0	0	1.38517	1.51159	0	0	0	0	0	0	0	0	0	0	0	0	0	0	0	1.15062	1.22859	0	0	2.74017	MASS_SPEC: Zasada_31445514_day36GA, RNASEQ: Yuon_chou_37507442_deg_cord
CYP2U1	0	0	0	0	0	0	0	0	0	0	0	0	0	0	0	0	0	1.49598	0	0	0	0	0	0	0	0	0	0	0	1.2425	0	2.73848	MICROARRAY: Pietrzyk_24194948_down_day5, RNASEQ: Yuon_chou_37507442_deg_day14
SLC18A2	0	0	0	0	0	0	0	0	0	0	0	0	1.38749	0	0	1.33284	0	0	0	0	0	0	0	0	0	0	0	0	1.34924	1.25797	0	2.73673	MICROARRAY: Bharracharya_22723293, RNASEQ: Yuon_chou_37507442_deg_cord
CCR7	0	0	0	0	0	0	0	0	0	0	0	0	0	0	0	0	0	1.50276	0	0	0	0	0	0	0	0	0	0	1.23357	0	0	2.73634	RNASEQ: Yuon_chou_37507442_deg_cord, MICROARRAY: Pietrzyk_24194948_down_day5
CLU	0	0	0	0	0	0	0	0	0	0	0	1.49689	0	0	0	0	0	0	0	0	0	0	0	0	0	0	0	0	1.23496	0	0	2.73186	RNASEQ: Yuon_chou_37507442_deg_cord, MASS_SPEC: Zasada_31445514_day36GA
CD3D	0	0	0	0	0	0	0	0	0	0	0	0	0	0	0	0	1.57229	0	0	0	0	0	0	0	0	0	1.15537	0	0	0	0	2.72766	RNASEQ: Yuon_chou_37507442_cpg_day14, MICROARRAY: Pietrzyk_24194948_down_day28
GATA3	0	0	0	0	0	0	0	0	0	0	0	0	0	0	0	0	1.57936	0	0	0	0	0	0	0	0	0	0	1.14761	0	0	0	2.72697	RNASEQ: Yuon_chou_37507442_cpg_day28, MICROARRAY: Pietrzyk_24194948_down_day28
PITPNC1	0	0	0	0	0	0	0	0	0	0	0	0	0	0	0	0	0	1.496	0	0	0	0	0	0	0	0	1.16455	0	1.22907	0	0	2.72507	RNASEQ: Yuon_chou_37507442_deg_cord, MICROARRAY: Pietrzyk_24194948_down_day5
KIF18B	0	0	0	0	0	0	0	0	0	0	0	0	1.38749	0	0	0	0	0	0	0	0	0	0	0	0	0	0	0	1.33091	1.23827	0	2.71839	MICROARRAY: Bharracharya_22723293, RNASEQ: Yuon_chou_37507442_deg_cord
MMP8	0	0	0	1.54399	0	0	0	0	0	0	0	0	0	0	0	0	0	0	0	0	0	0	0	0	0	0	1.17163	0	0	0	0	2.71563	EXOMESEQ: Luo_36514862_eqtl, RNASEQ: Yuon_chou_37507442_cpg_day14
ABLIM1	0	0	0	1.54399	0	0	0	0	0	0	0	0	0	0	0	0	0	0	0	0	0	0	0	0	0	0	1.17146	0	0	0	0	2.71545	EXOMESEQ: Luo_36514862_eqtl, RNASEQ: Yuon_chou_37507442_cpg_day14
CLCN4	0	0	0	0	0	0	0	0	0	0	0	0	0	0	0	1.36681	0	0	0	0	0	0	0	0	0	0	0	0	1.33594	0	0	2.70275	RNASEQ: Yuon_chou_37507442_deg_cord, MICROARRAY: Gong_32412065
C1S	0	0	0	0	0	0	0	0	0	0	0	1.53118	0	0	0	0	0	0	0	0	0	0	0	0	0	0	1.17062	0	0	0	0	2.7018	RNASEQ: Yuon_chou_37507442_cpg_day14, MASS_SPEC: Zasada_31445514_day36GA
CRTAM	0	0	0	0	0	0	0	0	0	0	0	0	0	0	0	0	0	0	0	1.52969	0	0	0	0	0	0	1.17055	0	0	0	0	2.70023	MICROARRAY: Pietrzyk_24194948_up_day5, RNASEQ: Yuon_chou_37507442_cpg_day14
CYS1	0	0	1.25219	0	0	0	0	0	0	0	0	0	0	0	0	1.44783	0	0	0	0	0	0	0	0	0	0	0	0	0	0	0	2.70002	EXOMESEQ: Li_26030808, MICROARRAY: Gong_32412065
CNR2	0	0	1.25219	0	0	0	0	0	0	0	0	0	0	0	0	1.4462	0	0	0	0	0	0	0	0	0	0	0	0	0	0	0	2.69839	EXOMESEQ: Li_26030808, MICROARRAY: Gong_32412065
IGHG3	0	0	0	0	0	0	0	0	0	0	1.37818	1.44792	0	0	0	0	0	0	0	0	0	0	0	0	0	0	0	0	1.24547	0	0	2.69339	MASS_SPEC: Zasada_31445514_day36GA, RNASEQ: Yuon_chou_37507442_deg_cord
NKTR	0	0	0	1.54399	0	0	0	0	0	0	0	0	0	0	0	0	0	0	0	0	0	0	0	0	0	0	1.14921	0	0	0	0	2.6932	EXOMESEQ: Luo_36514862_eqtl, RNASEQ: Yuon_chou_37507442_cpg_day14
HBG2	0	0	0	0	0	0	0	0	0	0	1.38238	0	0	0	1.31071	0	0	0	0	0	0	0	0	0	0	0	0	0	0	0	0	2.69309	MASS_SPEC: Zasada_31445514, MICROARRAY: Fulton_30459472
ARID1B	0	0	0	1.54399	0	0	0	0	0	0	0	0	0	0	0	0	0	0	0	0	0	0	0	0	0	0	0	1.14715	0	0	0	2.69114	EXOMESEQ: Luo_36514862_eqtl, RNASEQ: Yuon_chou_37507442_cpg_day28
ANXA3	0	0	0	1.54399	0	0	0	0	0	0	0	0	0	0	0	0	0	0	0	0	0	0	0	0	0	0	0	1.14656	0	0	0	2.69055	EXOMESEQ: Luo_36514862_eqtl, RNASEQ: Yuon_chou_37507442_cpg_day28
SPC25	0	0	0	0	0	0	0	0	0	0	0	0	1.38749	0	0	0	0	0	0	0	0	0	0	0	0	0	0	0	1.23542	1.30255	0	2.69004	MICROARRAY: Bharracharya_22723293, RNASEQ: Yuon_chou_37507442_deg_day14
NF2	0	0	0	1.54399	0	0	0	0	0	0	0	0	0	0	0	0	0	0	0	0	0	0	0	0	0	0	0	1.14411	0	0	0	2.68811	EXOMESEQ: Luo_36514862_eqtl, RNASEQ: Yuon_chou_37507442_cpg_day28
COL19A1	0	0	0	0	0	0	0	0	0	0	0	0	0	0	0	1.43686	0	0	0	0	0	0	0	0	0	0	0	0	0	1.25113	0	2.68798	MICROARRAY: Gong_32412065, RNASEQ: Yuon_chou_37507442_deg_day14
IGHA1	0	0	0	0	0	0	0	0	0	1.29872	0	0	1.38749	0	0	0	0	0	0	0	0	0	0	0	0	0	0	0	0	0	0	2.6862	MICROARRAY: Bharracharya_22723293, MASS_SPEC: Ahmed_37839510
ANXA8L1	0	0	0	0	0	0	0	0	0	1.29872	0	0	1.38749	0	0	0	0	0	0	0	0	0	0	0	0	0	0	0	0	0	0	2.6862	MICROARRAY: Bharracharya_22723293, MASS_SPEC: Ahmed_37839510
SP140L	0	0	0	0	0	0	0	0	0	0	0	0	0	0	0	1.46178	0	0	0	0	0	0	0	0	0	0	0	0	1.2203	0	0	2.68209	RNASEQ: Yuon_chou_37507442_deg_cord, MICROARRAY: Gong_32412065
FCRL1	0	0	1.25219	0	0	0	0	0	0	0	0	0	0	0	0	1.42965	0	0	0	0	0	0	0	0	0	0	0	0	0	0	0	2.68184	EXOMESEQ: Li_26030808, MICROARRAY: Gong_32412065
TOP2A	0	0	0	0	0	0	0	0	0	0	0	0	1.38749	0	0	0	0	0	0	0	0	0	0	0	0	0	0	0	1.24054	1.28894	0	2.67643	MICROARRAY: Bharracharya_22723293, RNASEQ: Yuon_chou_37507442_deg_day14
EBF1	0	0	0	0	0	0	0	0	0	0	0	0	0	0	0	1.45815	0	0	0	0	0	0	0	0	0	0	0	0	1.21559	0	0	2.67374	RNASEQ: Yuon_chou_37507442_deg_cord, MICROARRAY: Gong_32412065
RTKN2	0	0	0	0	0	0	0	0	0	0	0	0	1.38749	0	0	0	0	0	0	0	0	0	0	0	0	0	0	0	0	1.27992	0	2.66741	MICROARRAY: Bharracharya_22723293, RNASEQ: Yuon_chou_37507442_deg_day14
DLGAP5	0	0	0	0	0	0	0	0	0	0	0	0	1.38749	0	0	0	0	0	0	0	0	0	0	0	0	0	0	0	1.27473	0	0	2.66222	MICROARRAY: Bharracharya_22723293, RNASEQ: Yuon_chou_37507442_deg_cord
CD180	0	0	0	0	0	0	0	0	0	0	0	0	0	0	0	1.40037	0	0	0	0	0	0	0	0	0	0	1.1625	0	0	1.26165	0	2.66202	MICROARRAY: Gong_32412065, RNASEQ: Yuon_chou_37507442_deg_day14
PAPPA2	0	0	1.25219	0	0	0	0	0	0	0	0	0	0	0	0	0	0	0	0	0	0	0	0	0	0	0	0	0	1.40904	0	0	2.66123	EXOMESEQ: Li_26030808, RNASEQ: Yuon_chou_37507442_deg_cord
RUBCNL	0	0	0	0	0	0	0	0	0	0	0	0	0	0	0	1.42557	0	0	0	0	0	0	0	0	0	0	0	0	0	1.23464	0	2.66021	MICROARRAY: Gong_32412065, RNASEQ: Yuon_chou_37507442_deg_day14
KLHL14	0	0	0	0	0	0	0	0	0	0	0	0	0	0	0	1.38409	0	0	0	0	0	0	0	0	0	0	0	0	0	1.27207	0	2.65615	MICROARRAY: Gong_32412065, RNASEQ: Yuon_chou_37507442_deg_day14
STAP1	0	0	0	0	0	0	0	0	0	0	0	0	0	0	0	1.42425	0	0	0	0	0	0	0	0	0	0	0	0	1.22698	0	0	2.65123	RNASEQ: Yuon_chou_37507442_deg_cord, MICROARRAY: Gong_32412065
HLA-DQB1	0	0	0	0	0	0	0	0	0	0	0	0	0	0	0	1.41199	0	0	0	0	0	0	0	1.23737	0	0	0	0	0	0	0	2.64936	MICROARRAY: Gong_32412065, RNASEQ: Oji_mmuo_33177681_mRNA
IL18R1	0	0	1.25219	0	0	0	0	0	0	0	0	0	0	0	0	0	0	0	0	0	0	0	0	0	0	0	0	0	1.39484	0	0	2.64703	EXOMESEQ: Li_26030808, RNASEQ: Yuon_chou_37507442_deg_cord
TTK	0	0	0	0	0	0	0	0	0	0	0	0	1.38749	0	0	0	0	0	0	0	0	0	0	0	0	0	0	0	0	1.25922	0	2.6467	MICROARRAY: Bharracharya_22723293, RNASEQ: Yuon_chou_37507442_deg_day14
CAMK2D	0	0	0	0	0	0	0	0	0	0	0	0	0	0	0	1.40648	0	0	0	0	0	0	0	0	0	0	0	0	1.23334	0	0	2.63982	RNASEQ: Yuon_chou_37507442_deg_cord, MICROARRAY: Gong_32412065
CD8A	0	0	1.25219	0	0	0	0	0	0	0	0	0	1.38749	0	0	0	0	0	0	0	0	0	0	0	0	0	0	0	0	0	0	2.63967	MICROARRAY: Bharracharya_22723293, EXOMESEQ: Li_26030808
SELE	0	0	1.25219	0	0	0	0	0	0	0	0	0	1.38749	0	0	0	0	0	0	0	0	0	0	0	0	0	0	0	0	0	0	2.63967	MICROARRAY: Bharracharya_22723293, EXOMESEQ: Li_26030808
ADORA3	0	0	1.25219	0	0	0	0	0	0	0	0	0	1.38749	0	0	0	0	0	1.20585	0	0	0	0	0	0	0	0	0	0	0	0	2.63967	MICROARRAY: Bharracharya_22723293, EXOMESEQ: Li_26030808
CD5L	0	0	1.25219	0	0	0	0	0	0	0	0	0	1.38749	0	0	0	0	0	0	0	0	0	0	0	0	0	0	0	0	0	0	2.63967	MICROARRAY: Bharracharya_22723293, EXOMESEQ: Li_26030808
KMO	0	0	1.25219	0	0	0	0	0	0	0	0	0	1.38749	0	0	0	0	0	0	0	0	0	0	0	0	0	0	0	0	0	0	2.63967	MICROARRAY: Bharracharya_22723293, EXOMESEQ: Li_26030808
NEK2	0	0	1.25219	0	0	0	0	0	0	0	0	0	1.38749	0	0	0	0	0	0	0	0	0	0	0	0	0	0	0	0	0	0	2.63967	MICROARRAY: Bharracharya_22723293, EXOMESEQ: Li_26030808
MARCO	0	0	1.25219	0	0	0	0	0	0	0	0	0	1.38749	0	0	1.35921	0	0	0	0	0	0	0	0	0	0	0	0	0	0	0	2.63967	MICROARRAY: Bharracharya_22723293, EXOMESEQ: Li_26030808
RORC	0	0	1.25219	0	0	0	0	0	0	0	0	0	1.38749	0	0	0	0	0	0	0	0	0	0	0	0	0	0	0	0	0	0	2.63967	MICROARRAY: Bharracharya_22723293, EXOMESEQ: Li_26030808
KANK4	0	0	1.25219	0	0	0	0	0	0	0	0	0	1.38749	0	0	0	0	0	0	0	0	0	0	0	0	0	0	0	0	0	0	2.63967	MICROARRAY: Bharracharya_22723293, EXOMESEQ: Li_26030808
FCER1A	0	0	1.25219	0	0	0	0	0	0	0	0	0	1.38749	0	0	0	0	0	0	0	0	0	0	0	0	0	0	0	0	0	0	2.63967	MICROARRAY: Bharracharya_22723293, EXOMESEQ: Li_26030808
S100A3	0	0	1.25219	0	0	0	0	0	0	0	0	0	1.38749	0	0	0	0	0	0	0	0	0	0	0	0	0	0	0	0	0	0	2.63967	MICROARRAY: Bharracharya_22723293, EXOMESEQ: Li_26030808
ITLN1	0	0	1.25219	0	0	0	0	0	0	0	0	0	1.38749	0	0	0	0	0	0	0	0	0	0	0	0	0	0	0	0	0	0	2.63967	MICROARRAY: Bharracharya_22723293, EXOMESEQ: Li_26030808
BIRC5	0	0	0	0	0	0	0	0	0	0	0	0	1.38749	0	0	0	0	0	0	0	0	0	0	0	0	0	0	0	0	1.25214	0	2.63962	MICROARRAY: Bharracharya_22723293, RNASEQ: Yuon_chou_37507442_deg_day14
FAM167A	0	0	0	0	0	0	0	0	0	0	0	0	0	0	0	1.47535	0	0	0	0	0	0	0	0	0	0	1.16076	0	0	0	0	2.63611	MICROARRAY: Gong_32412065, RNASEQ: Yuon_chou_37507442_cpg_day14
MKI67	0	0	0	0	0	0	0	0	0	0	0	0	1.38749	0	0	0	0	0	0	0	0	0	0	0	0	0	1.15744	0	1.23848	1.24713	0	2.63462	MICROARRAY: Bharracharya_22723293, RNASEQ: Yuon_chou_37507442_deg_day14
JUN	0	0	1.25219	0	0	0	0	0	0	0	0	0	0	0	0	1.38048	0	0	0	0	0	0	0	0	0	0	0	0	0	0	0	2.63267	EXOMESEQ: Li_26030808, MICROARRAY: Gong_32412065
AGT	0	0	1.25219	0	0	0	0	0	0	0	1.37958	0	0	0	0	0	0	0	0	0	0	0	0	0	0	0	0	0	0	0	0	2.63177	MASS_SPEC: Zasada_31445514, EXOMESEQ: Li_26030808
CR2	0	0	1.25219	0	0	0	0	0	0	0	0	0	0	0	0	1.37777	0	0	0	0	0	0	0	0	0	0	0	0	0	0	0	2.62996	EXOMESEQ: Li_26030808, MICROARRAY: Gong_32412065
TENT5B	0	0	1.25219	0	0	0	0	0	0	0	0	0	0	0	0	0	0	0	0	0	0	0	0	0	0	0	0	0	1.37729	0	0	2.62947	EXOMESEQ: Li_26030808, RNASEQ: Yuon_chou_37507442_deg_cord
SIGLEC1	0	0	0	0	0	0	0	0	0	0	0	0	1.38749	0	0	0	0	0	0	0	0	0	0	0	0	0	0	0	1.24163	0	0	2.62911	MICROARRAY: Bharracharya_22723293, RNASEQ: Yuon_chou_37507442_deg_cord
BCL11A	0	0	1.25219	0	0	0	0	0	0	0	0	0	0	0	0	1.37648	0	0	0	0	0	0	0	0	0	0	0	0	0	0	0	2.62866	EXOMESEQ: Li_26030808, MICROARRAY: Gong_32412065
GREM1	0	0	0	0	0	0	0	0	0	0	0	0	1.38749	0	0	0	0	0	0	0	0	0	0	0	0	0	0	0	1.23921	0	0	2.62669	MICROARRAY: Bharracharya_22723293, RNASEQ: Yuon_chou_37507442_deg_cord
MZB1	0	0	0	0	0	0	0	0	0	0	0	0	0	0	0	1.39657	0	0	0	0	0	0	0	0	0	0	0	0	1.22938	0	0	2.62594	RNASEQ: Yuon_chou_37507442_deg_cord, MICROARRAY: Gong_32412065
CD79B	0	0	0	0	0	0	0	0	0	0	0	0	0	0	0	1.39298	0	0	0	0	0	0	0	0	0	0	1.14864	0	1.23252	0	0	2.62549	RNASEQ: Yuon_chou_37507442_deg_cord, MICROARRAY: Gong_32412065
TNIP3	0	0	0	0	0	0	0	0	0	0	0	0	1.38749	0	0	0	0	0	0	0	0	0	0	0	0	0	1.15088	0	1.23783	0	0	2.62531	MICROARRAY: Bharracharya_22723293, RNASEQ: Yuon_chou_37507442_deg_cord
EREG	0	0	0	0	0	0	0	0	0	0	0	0	1.38749	0	0	0	0	0	0	0	0	0	0	0	0	0	0	0	1.2375	0	0	2.62499	MICROARRAY: Bharracharya_22723293, RNASEQ: Yuon_chou_37507442_deg_cord
DHRS3	0	0	1.25219	0	0	0	0	0	0	0	0	0	0	0	0	0	0	0	0	0	0	0	0	0	0	0	0	1.14449	1.37142	1.24213	0	2.62361	EXOMESEQ: Li_26030808, RNASEQ: Yuon_chou_37507442_deg_cord
DPF3	0	0	0	0	0	0	0	0	0	0	0	0	0	0	0	1.33872	0	0	0	0	0	0	0	0	0	0	1.15446	0	0	1.28432	0	2.62303	MICROARRAY: Gong_32412065, RNASEQ: Yuon_chou_37507442_deg_day14
BEND5	0	0	1.25219	0	0	0	0	0	0	0	0	0	0	0	0	1.37051	0	0	0	0	0	0	0	0	0	0	0	0	0	0	0	2.6227	EXOMESEQ: Li_26030808, MICROARRAY: Gong_32412065
TOX	0	0	0	0	0	0	0	0	0	0	0	0	0	0	1.31071	0	0	0	0	0	0	0	0	0	0	0	0	0	1.3118	0	0	2.62251	RNASEQ: Yuon_chou_37507442_deg_cord, MICROARRAY: Fulton_30459472
GSDME	0	0	0	0	0	0	0	0	0	0	0	0	0	0	0	1.40439	0	0	0	0	0	0	0	0	0	0	0	0	1.21749	0	0	2.62188	RNASEQ: Yuon_chou_37507442_deg_cord, MICROARRAY: Gong_32412065
TYMSOS	0	0	0	0	0	0	0	0	0	0	0	0	0	0	0	1.34206	0	0	0	0	0	0	0	0	0	0	0	0	1.27976	0	0	2.62182	RNASEQ: Yuon_chou_37507442_deg_cord, MICROARRAY: Gong_32412065
ANLN	0	0	0	0	0	0	0	0	0	0	0	0	1.38749	0	0	0	0	0	0	0	0	0	0	0	0	0	0	0	1.23414	0	0	2.62162	MICROARRAY: Bharracharya_22723293, RNASEQ: Yuon_chou_37507442_deg_cord
FAAP20	0	0	1.25219	0	0	0	0	0	0	0	0	0	0	0	0	0	0	0	0	0	0	0	0	0	0	0	1.17153	1.36753	0	0	0	2.61972	EXOMESEQ: Li_26030808, RNASEQ: Yuon_chou_37507442_cpg_day28
OLFM2	0	0	0	0	0	0	0	0	0	0	0	0	0	0	0	0	0	0	0	0	0	1.29875	0	0	0	0	1.17079	1.31955	1.21866	0	0	2.6183	RNASEQ: Yuon_chou_37507442_cpg_day28, MICROARRAY: Windhorst_37090732
TSIX	0	0	0	0	0	0	0	0	0	0	0	0	0	0	0	1.35201	0	0	0	0	0	0	0	0	0	0	0	0	1.26628	0	0	2.61829	RNASEQ: Yuon_chou_37507442_deg_cord, MICROARRAY: Gong_32412065
CXCR5	0	0	0	0	0	0	0	0	0	0	0	0	0	0	0	1.36001	0	0	0	0	0	0	0	0	0	0	0	0	0	1.25771	0	2.61772	MICROARRAY: Gong_32412065, RNASEQ: Yuon_chou_37507442_deg_day14
SPIB	0	0	0	0	0	0	0	0	0	0	0	0	0	0	0	1.36888	0	0	0	0	0	0	0	0	0	0	0	0	1.21486	1.24682	0	2.6157	RNASEQ: Yuon_chou_37507442_deg_day14, MICROARRAY: Gong_32412065
AGER	0	0	0	0	0	0	0	0	0	0	0	0	1.38749	0	0	0	0	0	0	0	0	0	0	0	0	0	0	0	1.22792	0	0	2.6154	MICROARRAY: Bharracharya_22723293, RNASEQ: Yuon_chou_37507442_deg_cord
KIF23	0	0	0	0	0	0	0	0	0	0	0	0	1.38749	0	0	0	0	0	0	0	0	0	0	0	0	0	0	0	1.22664	0	0	2.61413	MICROARRAY: Bharracharya_22723293, RNASEQ: Yuon_chou_37507442_deg_cord
BPIFB1	0	1.22591	0	0	0	0	0	0	0	0	0	0	1.38749	0	0	0	0	0	0	0	0	0	0	0	0	0	0	0	0	0	0	2.6134	MICROARRAY: Bharracharya_22723293, EXOMESEQ: Hamvas_30342483
ARNTL2	0	0	0	0	0	0	0	0	0	0	0	0	1.38749	0	0	0	0	0	0	0	0	0	0	0	0	0	1.17056	1.14912	1.22522	0	0	2.61271	MICROARRAY: Bharracharya_22723293, RNASEQ: Yuon_chou_37507442_deg_cord
PHACTR4	0	0	1.25219	0	0	0	0	0	0	0	0	0	0	0	0	0	0	0	0	0	0	0	0	0	0	0	0	1.3526	0	1.24332	0	2.60478	EXOMESEQ: Li_26030808, RNASEQ: Yuon_chou_37507442_cpg_day28
C1QA	0	0	0	0	0	0	0	0	0	0	0	0	1.38749	0	0	1.33307	0	0	0	0	0	0	0	0	0	0	0	0	1.21721	0	0	2.60469	MICROARRAY: Bharracharya_22723293, RNASEQ: Yuon_chou_37507442_deg_cord
CYP1B1	0	0	1.25219	0	0	0	0	0	0	0	0	0	0	0	0	1.35231	0	0	0	0	0	0	0	0	0	0	0	0	0	0	0	2.6045	EXOMESEQ: Li_26030808, MICROARRAY: Gong_32412065
PLEKHG1	0	0	0	0	0	0	0	0	0	0	0	0	0	0	0	1.45995	0	0	0	0	0	0	0	0	0	0	0	1.14431	0	0	0	2.60426	MICROARRAY: Gong_32412065, RNASEQ: Yuon_chou_37507442_cpg_day28
FLT1	0	0	0	0	0	0	0	0	0	0	0	0	0	0	0	0	0	0	0	0	0	1.29875	0	0	0	0	0	0	0	1.30529	0	2.60405	MICROARRAY: Windhorst_37090732, RNASEQ: Yuon_chou_37507442_deg_day14
LAMB3	0	0	1.25219	0	0	0	0	0	0	0	0	0	0	0	0	0	0	0	0	0	0	0	0	0	0	0	0	0	1.35164	0	0	2.60382	EXOMESEQ: Li_26030808, RNASEQ: Yuon_chou_37507442_deg_cord
IL7	0	0	0	0	0	0	0	0	0	0	0	0	0	0	0	1.48159	0	0	0	0	0	0	0	0	0	1.12134	0	0	0	0	0	2.60293	RNASEQ: Tsotakos_35947545_down, MICROARRAY: Gong_32412065
FCRL5	0	0	1.25219	0	0	0	0	0	0	0	0	0	0	0	0	1.35059	0	0	0	0	0	0	0	0	0	0	0	0	0	0	0	2.60278	EXOMESEQ: Li_26030808, MICROARRAY: Gong_32412065
RPF1	0	0	1.25219	0	0	0	0	0	0	0	0	0	0	0	0	1.35005	0	0	0	0	0	0	0	0	0	0	0	0	0	0	0	2.60224	EXOMESEQ: Li_26030808, MICROARRAY: Gong_32412065
OR13A1	0	0	0	0	0	0	0	0	0	0	0	0	0	0	0	1.43105	0	0	0	0	0	0	0	0	0	0	1.17098	0	0	0	0	2.60203	MICROARRAY: Gong_32412065, RNASEQ: Yuon_chou_37507442_cpg_day14
MYO7B	0	0	1.25219	0	0	0	0	0	0	0	0	0	0	0	0	1.34828	0	0	0	0	0	0	0	0	0	0	0	0	0	0	0	2.60046	EXOMESEQ: Li_26030808, MICROARRAY: Gong_32412065
ZWINT	0	0	0	0	0	0	0	0	0	0	0	0	0	0	0	1.33711	0	0	0	0	0	0	0	0	0	0	0	0	0	1.26324	0	2.60035	MICROARRAY: Gong_32412065, RNASEQ: Yuon_chou_37507442_deg_day14
HAL	0	0	0	0	0	0	0	0	0	0	0	0	0	0	0	0	0	0	0	0	0	1.29875	0	0	0	0	0	0	0	1.30035	0	2.59911	MICROARRAY: Windhorst_37090732, RNASEQ: Yuon_chou_37507442_deg_day14
CYP27A1	0	0	0	0	0	0	0	0	0	0	0	0	0	0	0	0	0	0	0	0	0	1.29875	0	0	0	0	0	1.29964	0	1.25356	0	2.59839	MICROARRAY: Windhorst_37090732, RNASEQ: Yuon_chou_37507442_cpg_day28
HLA-DPB1	0	0	0	0	0	0	0	0	0	0	0	0	0	0	0	1.36126	0	0	0	0	0	0	0	0	0	0	0	0	1.23535	0	0	2.59661	RNASEQ: Yuon_chou_37507442_deg_cord, MICROARRAY: Gong_32412065
CLEC17A	0	0	0	0	0	0	0	0	0	0	0	0	0	0	0	1.37712	0	0	0	0	0	0	0	0	0	0	0	0	1.2186	0	0	2.59572	RNASEQ: Yuon_chou_37507442_deg_cord, MICROARRAY: Gong_32412065
LOC613266	0	0	0	0	0	0	0	0	0	0	0	0	0	0	0	1.45118	0	0	0	0	0	0	0	0	0	0	0	1.144	0	0	0	2.59518	MICROARRAY: Gong_32412065, RNASEQ: Yuon_chou_37507442_cpg_day28
ZFP28	0	0	0	0	0	0	0	0	0	0	0	0	0	0	0	1.33245	0	0	0	0	0	0	0	0	0	0	0	0	0	1.26098	0	2.59343	MICROARRAY: Gong_32412065, RNASEQ: Yuon_chou_37507442_deg_day14
SLC25A34	0	0	1.25219	0	0	0	0	0	0	0	0	0	0	0	0	1.34104	0	0	0	0	0	0	0	0	0	0	0	0	0	0	0	2.59322	EXOMESEQ: Li_26030808, MICROARRAY: Gong_32412065
TNFRSF12A	0	0	0	0	0	0	0	0	0	0	0	0	0	0	1.31071	0	0	0	0	0	0	0	0	0	0	0	0	0	1.28102	0	0	2.59173	RNASEQ: Yuon_chou_37507442_deg_cord, MICROARRAY: Fulton_30459472
PTPRF	0	0	1.25219	0	0	0	0	0	0	0	0	0	0	0	0	1.33851	0	0	0	0	0	0	0	0	0	0	0	0	0	0	0	2.59069	EXOMESEQ: Li_26030808, MICROARRAY: Gong_32412065
ROR1	0	0	1.25219	0	0	0	0	0	0	0	0	0	0	0	0	1.33534	0	0	0	0	0	0	0	0	0	0	0	0	0	0	0	2.58753	EXOMESEQ: Li_26030808, MICROARRAY: Gong_32412065
MARCHF2	0	0	1.25219	0	0	0	0	0	0	0	0	0	0	0	0	1.33419	0	0	0	0	0	0	0	0	0	0	0	0	0	0	0	2.58638	EXOMESEQ: Li_26030808, MICROARRAY: Gong_32412065
SPATA21	0	0	1.25219	0	0	0	0	0	0	0	0	0	0	0	0	1.33398	0	0	0	0	0	0	0	0	0	0	0	0	0	0	0	2.58617	EXOMESEQ: Li_26030808, MICROARRAY: Gong_32412065
TTLL10	0	0	1.25219	0	0	0	0	0	0	0	0	0	0	0	0	1.3325	0	0	0	0	0	0	0	0	0	0	0	0	0	0	0	2.58469	EXOMESEQ: Li_26030808, MICROARRAY: Gong_32412065
FCRL3	0	0	1.25219	0	0	0	0	0	0	0	0	0	0	0	0	1.33227	0	0	0	0	0	0	0	0	0	0	0	0	0	0	0	2.58445	EXOMESEQ: Li_26030808, MICROARRAY: Gong_32412065
PHLPP2	0	0	0	0	0	0	0	0	0	0	0	0	0	0	0	1.34024	0	0	0	0	0	0	0	0	0	0	0	0	0	1.24027	0	2.5805	MICROARRAY: Gong_32412065, RNASEQ: Yuon_chou_37507442_deg_day14
CDO1	0	0	0	0	0	0	0	0	0	0	0	0	0	0	0	1.33271	0	0	0	0	0	0	0	0	0	0	0	0	1.24654	0	0	2.57924	RNASEQ: Yuon_chou_37507442_deg_cord, MICROARRAY: Gong_32412065
DLC1	0	0	0	0	0	0	0	0	0	0	0	0	0	0	0	1.33329	0	0	0	0	0	0	0	0	0	0	1.16184	0	1.22132	1.24514	0	2.57843	RNASEQ: Yuon_chou_37507442_deg_day14, MICROARRAY: Gong_32412065
CPNE5	0	0	0	0	0	0	0	0	0	0	0	0	0	0	0	1.34076	0	0	0	0	0	0	0	0	0	0	0	0	0	1.23639	0	2.57715	MICROARRAY: Gong_32412065, RNASEQ: Yuon_chou_37507442_deg_day14
KHDRBS2	0	0	0	0	0	0	0	0	0	0	0	0	0	0	0	1.41549	0	0	0	0	0	0	0	0	0	0	1.16161	0	0	0	0	2.5771	MICROARRAY: Gong_32412065, RNASEQ: Yuon_chou_37507442_cpg_day14
CKAP2	0	0	0	0	0	0	0	0	0	0	0	0	0	0	0	1.34667	0	0	0	0	0	0	0	0	0	0	0	0	1.23027	0	0	2.57694	RNASEQ: Yuon_chou_37507442_deg_cord, MICROARRAY: Gong_32412065
ARHGAP42	0	0	0	0	0	0	0	0	0	0	0	0	0	0	0	1.33238	0	0	0	0	0	0	0	0	0	0	0	0	0	1.24456	0	2.57694	MICROARRAY: Gong_32412065, RNASEQ: Yuon_chou_37507442_deg_day14
MYCL	0	0	1.25219	0	0	0	0	0	0	0	0	0	0	0	0	0	0	0	0	0	0	0	0	0	0	0	0	0	1.32431	0	0	2.5765	EXOMESEQ: Li_26030808, RNASEQ: Yuon_chou_37507442_deg_cord
TPP2	0	0	0	0	0	0	0	0	0	1.29872	0	0	0	0	0	0	0	0	0	0	0	0	0	0	0	0	0	0	0	1.27744	0	2.57615	MASS_SPEC: Ahmed_37839510, RNASEQ: Yuon_chou_37507442_deg_day14
QRSL1	0	0	0	0	0	0	0	0	0	0	0	0	0	0	0	1.3596	0	0	0	0	0	0	0	0	0	0	0	0	1.21624	0	0	2.57584	RNASEQ: Yuon_chou_37507442_deg_cord, MICROARRAY: Gong_32412065
SLC44A3	0	0	1.25219	0	0	0	0	0	0	0	0	0	0	0	0	0	0	0	0	0	0	0	0	0	0	0	0	0	1.32341	0	0	2.5756	EXOMESEQ: Li_26030808, RNASEQ: Yuon_chou_37507442_deg_cord
CD83	0	0	0	0	0	0	0	0	0	0	0	0	0	0	0	1.33321	0	0	0	0	0	0	0	0	0	0	0	0	1.24213	0	0	2.57533	RNASEQ: Yuon_chou_37507442_deg_cord, MICROARRAY: Gong_32412065
ABCB5	0	0	0	0	0	0	0	0	0	0	0	0	0	0	0	1.33228	0	0	0	0	0	0	0	0	0	0	0	1.14555	0	1.24017	0	2.57245	MICROARRAY: Gong_32412065, RNASEQ: Yuon_chou_37507442_deg_day14
FOLR3	0	0	0	0	0	0	0	0	0	0	0	0	0	0	0	1.33387	0	0	0	0	0	0	0	0	0	0	0	0	1.23795	0	0	2.57182	RNASEQ: Yuon_chou_37507442_deg_cord, MICROARRAY: Gong_32412065
DDIT4	0	0	0	0	0	0	0	0	0	0	0	0	0	0	0	1.33772	0	0	0	0	0	0	0	0	0	0	0	0	1.23051	0	0	2.56824	RNASEQ: Yuon_chou_37507442_deg_cord, MICROARRAY: Gong_32412065
DENND2D	0	0	1.25219	0	0	0	0	0	0	0	0	0	0	0	0	0	0	0	0	0	0	0	0	0	0	0	0	0	1.31574	0	0	2.56793	EXOMESEQ: Li_26030808, RNASEQ: Yuon_chou_37507442_deg_cord
HLA-DQA2	0	0	0	0	0	0	0	0	0	0	0	0	0	0	0	1.33415	0	0	0	0	0	0	0	0	0	0	0	0	1.23237	0	0	2.56652	RNASEQ: Yuon_chou_37507442_deg_cord, MICROARRAY: Gong_32412065
MLH3	0	0	0	0	0	0	0	0	0	0	0	0	0	0	0	0	0	0	0	0	0	1.29875	0	0	0	0	0	0	1.26767	0	0	2.56642	RNASEQ: Yuon_chou_37507442_deg_cord, MICROARRAY: Windhorst_37090732
MIER1	0	0	1.25219	0	0	0	0	0	0	0	0	0	0	0	0	0	0	0	0	0	0	0	0	0	0	0	0	0	1.31414	0	0	2.56632	EXOMESEQ: Li_26030808, RNASEQ: Yuon_chou_37507442_deg_cord
STRBP	0	0	0	0	0	0	0	0	0	0	0	0	0	0	0	1.42165	0	0	0	0	0	0	0	0	0	0	0	1.14434	0	0	0	2.566	MICROARRAY: Gong_32412065, RNASEQ: Yuon_chou_37507442_cpg_day28
PRKCE	0	0	0	0	0	0	0	0	0	0	0	0	0	0	0	1.33791	0	0	0	0	0	0	0	0	0	0	0	0	1.227	0	0	2.56492	RNASEQ: Yuon_chou_37507442_deg_cord, MICROARRAY: Gong_32412065
NPC1L1	0	0	0	0	0	0	0	0	0	0	0	0	0	0	1.31071	0	0	0	0	0	0	0	0	0	0	0	0	0	1.25419	0	0	2.56491	RNASEQ: Yuon_chou_37507442_deg_cord, MICROARRAY: Fulton_30459472
NR2F1	0	0	0	0	0	0	0	0	0	0	0	0	0	0	1.31071	0	0	0	0	0	0	0	0	0	0	0	0	1.14475	1.2539	0	0	2.56462	RNASEQ: Yuon_chou_37507442_deg_cord, MICROARRAY: Fulton_30459472
FBXO44	0	0	1.25219	0	0	0	0	0	0	0	0	0	0	0	0	0	0	0	0	0	0	0	0	0	0	0	0	0	1.31103	0	0	2.56322	EXOMESEQ: Li_26030808, RNASEQ: Yuon_chou_37507442_deg_cord
TGFBR3	0	0	1.25219	0	0	0	0	0	0	0	0	0	0	0	1.31071	0	0	0	0	0	0	0	0	0	0	0	0	0	0	0	0	2.5629	EXOMESEQ: Li_26030808, MICROARRAY: Fulton_30459472
PODN	0	0	1.25219	0	0	0	0	0	0	0	0	0	0	0	1.31071	0	0	0	0	0	0	0	0	0	0	0	0	0	0	0	0	2.5629	EXOMESEQ: Li_26030808, MICROARRAY: Fulton_30459472
MCOLN2	0	0	1.25219	0	0	0	0	0	0	0	0	0	0	0	1.31071	0	0	0	0	0	0	0	0	0	0	0	0	0	0	0	0	2.5629	EXOMESEQ: Li_26030808, MICROARRAY: Fulton_30459472
NID1	0	0	1.25219	0	0	0	0	0	0	0	0	0	0	0	1.31071	0	0	0	0	0	0	0	0	0	0	0	0	0	0	0	0	2.5629	EXOMESEQ: Li_26030808, MICROARRAY: Fulton_30459472
LRP1B	0	0	1.25219	0	0	0	0	0	0	0	0	0	0	0	1.31071	0	0	0	0	0	0	0	0	0	0	0	0	0	0	0	0	2.5629	EXOMESEQ: Li_26030808, MICROARRAY: Fulton_30459472
SLC20A1	0	0	1.25219	0	0	0	0	0	0	0	0	0	0	0	1.31071	0	0	0	0	0	0	0	0	0	0	0	0	0	0	0	0	2.5629	EXOMESEQ: Li_26030808, MICROARRAY: Fulton_30459472
FCMR	0	0	1.25219	0	0	0	0	0	0	0	0	0	0	0	1.31071	0	0	0	0	0	0	0	0	0	0	0	0	0	0	0	0	2.5629	EXOMESEQ: Li_26030808, MICROARRAY: Fulton_30459472
TENT5C	0	0	1.25219	0	0	0	0	0	0	0	0	0	0	0	1.31071	0	0	0	0	0	0	0	0	0	0	0	0	0	0	0	0	2.5629	EXOMESEQ: Li_26030808, MICROARRAY: Fulton_30459472
GSTM3	0	0	1.25219	0	0	0	0	0	0	0	0	0	0	0	1.31071	0	0	0	0	0	0	0	0	0	0	0	0	0	0	0	0	2.5629	EXOMESEQ: Li_26030808, MICROARRAY: Fulton_30459472
IL1A	0	0	1.25219	0	0	0	0	0	0	0	0	0	0	0	1.31071	0	0	0	0	0	0	0	0	0	0	0	0	0	0	0	0	2.5629	EXOMESEQ: Li_26030808, MICROARRAY: Fulton_30459472
IL1R1	0	0	1.25219	0	0	0	0	0	0	0	0	0	0	0	1.31071	0	0	0	0	0	0	0	0	0	0	0	0	0	0	0	0	2.5629	EXOMESEQ: Li_26030808, MICROARRAY: Fulton_30459472
BIN1	0	0	1.25219	0	0	0	0	0	0	0	0	0	0	0	0	0	0	0	0	0	0	0	0	0	0	0	0	0	1.31028	1.26314	0	2.56247	EXOMESEQ: Li_26030808, RNASEQ: Yuon_chou_37507442_deg_cord
WLS	0	0	1.25219	0	0	0	0	0	0	0	0	0	0	0	0	0	0	0	0	0	0	0	0	0	0	0	0	0	0	1.30576	0	2.55795	EXOMESEQ: Li_26030808, RNASEQ: Yuon_chou_37507442_deg_day14
PATJ	0	0	1.25219	0	0	0	0	0	0	0	0	0	0	0	0	0	0	0	0	0	0	0	0	0	0	0	0	0	1.22846	1.30552	0	2.55771	EXOMESEQ: Li_26030808, RNASEQ: Yuon_chou_37507442_deg_day14
TLE1	0	0	0	0	0	0	0	0	0	0	0	0	0	0	0	1.39385	0	0	0	0	0	0	0	0	0	0	1.16324	0	0	0	0	2.55709	MICROARRAY: Gong_32412065, RNASEQ: Yuon_chou_37507442_cpg_day14
RSAD2	0	0	1.25219	0	0	0	0	0	0	0	0	0	0	0	0	0	0	0	0	0	0	0	0	0	0	0	0	1.14671	0	1.30483	0	2.55701	EXOMESEQ: Li_26030808, RNASEQ: Yuon_chou_37507442_deg_day14
C12orf75	0	0	0	0	0	0	0	0	0	0	0	0	0	0	0	1.33332	0	0	0	0	0	0	0	0	0	0	0	0	1.22356	0	0	2.55689	RNASEQ: Yuon_chou_37507442_deg_cord, MICROARRAY: Gong_32412065
SERPINF1	0	0	0	0	0	0	0	0	0	0	0	0	0	0	1.31071	0	0	0	0	0	0	0	0	0	0	0	0	1.14576	0	1.24597	0	2.55668	MICROARRAY: Fulton_30459472, RNASEQ: Yuon_chou_37507442_deg_day14
CLSPN	0	0	1.25219	0	0	0	0	0	0	0	0	0	0	0	0	0	0	0	0	0	0	0	0	0	0	0	0	0	0	1.30414	0	2.55632	EXOMESEQ: Li_26030808, RNASEQ: Yuon_chou_37507442_deg_day14
PSPH	0	0	0	0	0	0	0	0	0	0	0	0	1.38749	0	0	0	0	0	0	0	0	0	0	0	0	0	1.16844	0	0	0	0	2.55592	MICROARRAY: Bharracharya_22723293, RNASEQ: Yuon_chou_37507442_cpg_day14
HLA-DQA1	0	0	0	0	0	0	0	0	0	0	0	0	0	0	0	1.33782	0	0	0	0	0	0	0	0	0	0	0	0	1.21804	0	0	2.55585	RNASEQ: Yuon_chou_37507442_deg_cord, MICROARRAY: Gong_32412065
FABP6	0	0	0	0	0	0	0	0	0	0	0	0	1.38749	0	0	0	0	0	0	0	0	0	0	0	0	0	1.16682	0	0	0	0	2.55431	MICROARRAY: Bharracharya_22723293, RNASEQ: Yuon_chou_37507442_cpg_day14
CXCL8	0	0	0	0	0	0	0	0	0	0	0	0	0	0	0	1.33345	0	0	0	0	0	0	0	0	0	0	0	0	1.21954	0	0	2.55298	RNASEQ: Yuon_chou_37507442_deg_cord, MICROARRAY: Gong_32412065
UTP25	0	0	1.25219	0	0	0	0	0	0	0	0	0	0	0	0	0	0	0	0	0	0	0	0	0	0	0	0	0	1.23345	1.30057	0	2.55276	EXOMESEQ: Li_26030808, RNASEQ: Yuon_chou_37507442_deg_day14
CDA	0	0	1.25219	0	0	0	0	0	0	0	0	0	0	0	0	0	0	0	0	0	0	1.29875	0	0	0	0	0	0	0	0	0	2.55094	EXOMESEQ: Li_26030808, MICROARRAY: Windhorst_37090732
DNAJC6	0	0	1.25219	0	0	0	0	0	0	0	0	0	0	0	0	0	0	0	0	0	0	1.29875	0	0	0	0	0	0	0	0	0	2.55094	EXOMESEQ: Li_26030808, MICROARRAY: Windhorst_37090732
FUBP1	0	0	1.25219	0	0	0	0	0	0	0	0	0	0	0	0	0	0	0	0	0	0	1.29875	0	0	0	0	0	0	0	0	0	2.55094	EXOMESEQ: Li_26030808, MICROARRAY: Windhorst_37090732
GJA8	0	0	1.25219	0	0	0	0	0	0	0	0	0	0	0	0	0	0	0	0	0	0	1.29875	0	0	0	0	0	0	0	0	0	2.55094	EXOMESEQ: Li_26030808, MICROARRAY: Windhorst_37090732
NCF2	0	0	1.25219	0	0	0	0	0	0	0	0	0	0	0	0	0	0	0	0	0	0	1.29875	0	0	0	0	0	0	0	0	0	2.55094	EXOMESEQ: Li_26030808, MICROARRAY: Windhorst_37090732
HLX	0	0	1.25219	0	0	0	0	0	0	0	0	0	0	0	0	0	0	0	0	0	0	1.29875	0	0	0	0	0	0	0	0	0	2.55094	EXOMESEQ: Li_26030808, MICROARRAY: Windhorst_37090732
NOL10	0	0	1.25219	0	0	0	0	0	0	0	0	0	0	0	0	0	0	0	0	0	0	1.29875	0	0	0	0	0	0	0	0	0	2.55094	EXOMESEQ: Li_26030808, MICROARRAY: Windhorst_37090732
SPTBN1	0	0	1.25219	0	0	0	0	0	0	0	0	0	0	0	0	0	0	0	0	0	0	1.29875	0	0	0	0	0	0	0	0	0	2.55094	EXOMESEQ: Li_26030808, MICROARRAY: Windhorst_37090732
AAK1	0	0	1.25219	0	0	0	0	0	0	0	0	0	0	0	0	0	0	0	0	0	0	1.29875	0	0	0	0	0	0	0	0	0	2.55094	EXOMESEQ: Li_26030808, MICROARRAY: Windhorst_37090732
IL1RL2	0	0	1.25219	0	0	0	0	0	0	0	0	0	0	0	0	0	0	0	0	0	0	1.29875	0	0	0	0	0	0	0	0	0	2.55094	EXOMESEQ: Li_26030808, MICROARRAY: Windhorst_37090732
GPR17	0	0	1.25219	0	0	0	0	0	0	0	0	0	0	0	0	0	0	0	0	0	0	1.29875	0	0	0	0	0	0	0	0	0	2.55094	EXOMESEQ: Li_26030808, MICROARRAY: Windhorst_37090732
FHL1	0	0	0	0	0	0	0	0	0	0	0	0	0	0	1.31071	0	0	0	0	0	0	0	0	0	0	0	0	0	0	1.24022	0	2.55093	MICROARRAY: Fulton_30459472, RNASEQ: Yuon_chou_37507442_deg_day14
PHGDH	0	0	1.25219	0	0	0	0	0	0	1.29872	0	0	0	0	0	0	0	0	0	0	0	0	0	0	0	0	0	0	0	0	0	2.5509	EXOMESEQ: Li_26030808, MASS_SPEC: Ahmed_37839510
S100A11	0	0	1.25219	0	0	0	0	0	0	1.29872	0	0	0	0	0	0	0	0	0	0	0	0	0	0	0	0	0	0	0	0	0	2.5509	EXOMESEQ: Li_26030808, MASS_SPEC: Ahmed_37839510
S100A14	0	0	1.25219	0	0	0	0	0	0	1.29872	0	0	0	0	0	0	0	0	0	0	0	0	0	0	0	0	0	0	0	0	0	2.5509	EXOMESEQ: Li_26030808, MASS_SPEC: Ahmed_37839510
SERPINC1	0	0	1.25219	0	0	0	0	0	0	1.29872	0	0	0	0	0	0	0	0	0	0	0	0	0	0	0	0	0	0	0	0	0	2.5509	EXOMESEQ: Li_26030808, MASS_SPEC: Ahmed_37839510
PIGR	0	0	1.25219	0	0	0	0	0	0	1.29872	0	0	0	0	0	0	0	0	0	0	0	0	0	0	0	0	0	0	0	0	0	2.5509	EXOMESEQ: Li_26030808, MASS_SPEC: Ahmed_37839510
NNMT	0	0	0	0	0	0	0	0	0	0	0	0	1.38749	0	0	0	0	0	0	0	0	1.29875	0	0	0	0	1.16296	0	0	0	0	2.55045	MICROARRAY: Bharracharya_22723293, RNASEQ: Yuon_chou_37507442_cpg_day14
PLXDC2	0	0	0	0	0	0	0	0	0	0	0	0	0	0	1.31071	0	0	0	0	0	0	0	0	0	0	0	1.16538	0	1.23969	0	0	2.5504	RNASEQ: Yuon_chou_37507442_deg_cord, MICROARRAY: Fulton_30459472
ZNF608	0	0	0	0	0	0	0	0	0	0	0	0	0	0	1.31071	1.38118	0	0	0	0	0	0	0	0	0	0	1.16715	0	0	0	0	2.54833	MICROARRAY: Gong_32412065, RNASEQ: Yuon_chou_37507442_cpg_day14
SCMH1	0	0	1.25219	0	0	0	0	0	0	0	0	0	0	0	0	0	0	0	0	0	0	0	0	0	0	0	0	0	0	1.29557	0	2.54775	EXOMESEQ: Li_26030808, RNASEQ: Yuon_chou_37507442_deg_day14
ACKR3	0	0	0	0	0	0	0	0	0	0	0	0	0	0	1.31071	0	0	0	0	0	0	0	0	0	0	0	0	0	1.23619	0	0	2.5469	RNASEQ: Yuon_chou_37507442_deg_cord, MICROARRAY: Fulton_30459472
ITIH3	0	0	0	0	0	0	0	0	0	0	1.38145	0	0	0	0	0	0	0	0	0	0	0	0	0	0	0	1.16464	0	0	0	0	2.54608	MASS_SPEC: Zasada_31445514, RNASEQ: Yuon_chou_37507442_cpg_day14
AGMAT	0	0	1.25219	0	0	0	0	0	0	0	0	0	0	0	0	0	0	0	0	0	0	0	0	0	0	0	0	0	1.21858	1.2936	0	2.54578	EXOMESEQ: Li_26030808, RNASEQ: Yuon_chou_37507442_deg_day14
PTGER2	0	0	0	0	0	0	0	0	0	0	0	0	0	0	1.31071	0	0	0	0	0	0	0	0	0	0	0	1.1619	0	1.23492	0	0	2.54563	RNASEQ: Yuon_chou_37507442_deg_cord, MICROARRAY: Fulton_30459472
ISG15	0	0	1.25219	0	0	0	0	0	0	0	0	0	0	0	0	0	0	0	0	0	0	0	0	0	0	0	0	1.1452	0	1.29263	0	2.54482	EXOMESEQ: Li_26030808, RNASEQ: Yuon_chou_37507442_deg_day14
VSIG4	0	0	0	0	0	0	0	0	0	0	0	0	0	0	0	0	0	0	0	0	0	1.29875	0	0	0	0	0	0	1.2452	0	0	2.54396	RNASEQ: Yuon_chou_37507442_deg_cord, MICROARRAY: Windhorst_37090732
GHRL	0	0	0	0	0	0	0	0	0	0	0	0	1.38749	0	0	0	0	0	0	0	0	0	0	0	0	0	1.15629	0	0	0	0	2.54378	MICROARRAY: Bharracharya_22723293, RNASEQ: Yuon_chou_37507442_cpg_day14
BBS2	0	0	0	0	0	0	0	0	0	0	0	0	0	0	0	0	0	0	0	0	0	1.29875	0	0	0	0	0	0	0	1.24479	0	2.54354	MICROARRAY: Windhorst_37090732, RNASEQ: Yuon_chou_37507442_deg_day14
POMC	0	0	1.25219	0	0	0	0	0	0	0	0	0	0	0	0	0	0	0	0	0	0	0	0	0	0	0	0	0	0	1.29057	0	2.54276	EXOMESEQ: Li_26030808, RNASEQ: Yuon_chou_37507442_deg_day14
CDC25C	0	0	0	0	0	0	0	0	0	0	0	0	1.38749	0	0	0	0	0	0	0	0	0	0	0	0	0	1.15511	0	0	0	0	2.54259	MICROARRAY: Bharracharya_22723293, RNASEQ: Yuon_chou_37507442_cpg_day14
MANEAL	0	0	1.25219	0	0	0	0	0	0	0	0	0	0	0	0	0	0	0	0	0	0	0	0	0	0	0	0	1.28932	0	0	0	2.5415	EXOMESEQ: Li_26030808, RNASEQ: Yuon_chou_37507442_cpg_day28
NDUFB1	0	0	0	0	0	0	0	0	0	0	0	0	0	0	0	0	0	0	0	0	0	1.29875	0	0	0	0	0	0	0	1.24165	0	2.54041	MICROARRAY: Windhorst_37090732, RNASEQ: Yuon_chou_37507442_deg_day14
BHLHE41	0	0	0	0	0	0	0	0	0	0	0	0	0	0	0	1.38189	0	0	0	0	0	0	0	0	0	0	1.15718	1.14563	0	0	0	2.53907	MICROARRAY: Gong_32412065, RNASEQ: Yuon_chou_37507442_cpg_day14
TENM1	0	0	0	0	0	0	0	0	0	0	0	0	0	0	1.31071	0	0	0	0	0	0	0	0	0	0	0	0	0	1.22828	0	0	2.53899	RNASEQ: Yuon_chou_37507442_deg_cord, MICROARRAY: Fulton_30459472
CMPK2	0	0	1.25219	0	0	0	0	0	0	0	0	0	0	0	0	0	0	0	0	0	0	0	0	0	0	0	0	0	0	1.28666	0	2.53885	EXOMESEQ: Li_26030808, RNASEQ: Yuon_chou_37507442_deg_day14
IRF6	0	0	1.25219	0	0	0	0	0	0	0	0	0	0	0	0	0	0	0	0	0	0	0	0	0	0	0	0	0	1.28603	0	0	2.53822	EXOMESEQ: Li_26030808, RNASEQ: Yuon_chou_37507442_deg_cord
ATP7B	0	0	0	0	0	0	0	0	0	0	0	0	0	0	0	0	0	0	0	0	0	1.29875	0	0	0	0	0	0	1.22437	1.23894	0	2.53769	RNASEQ: Yuon_chou_37507442_deg_day14, MICROARRAY: Windhorst_37090732
PTP4A1	0	0	0	0	0	0	0	0	0	0	0	0	0	0	0	0	0	0	0	0	0	1.29875	0	0	0	0	0	0	1.23886	0	0	2.53762	RNASEQ: Yuon_chou_37507442_deg_cord, MICROARRAY: Windhorst_37090732
HLA-DOA	0	0	0	0	0	0	0	0	0	0	0	0	0	0	0	1.36631	0	0	0	0	0	0	0	0	0	0	1.17021	0	0	0	0	2.53652	MICROARRAY: Gong_32412065, RNASEQ: Yuon_chou_37507442_cpg_day14
SH3YL1	0	0	1.25219	0	0	0	0	0	0	0	0	0	0	0	0	0	0	0	0	0	0	0	0	0	0	0	0	0	1.23076	1.28415	0	2.53634	EXOMESEQ: Li_26030808, RNASEQ: Yuon_chou_37507442_deg_day14
TFB1M	0	0	0	0	0	0	0	0	0	0	0	0	0	0	0	0	0	0	0	0	0	1.29875	0	0	0	0	0	0	1.22298	1.23748	0	2.53623	RNASEQ: Yuon_chou_37507442_deg_day14, MICROARRAY: Windhorst_37090732
SMYD2	0	0	1.25219	0	0	0	0	0	0	0	0	0	0	0	0	0	0	0	0	0	0	0	0	0	0	0	1.16214	0	1.27853	1.28367	0	2.53585	EXOMESEQ: Li_26030808, RNASEQ: Yuon_chou_37507442_deg_day14
CKAP2L	0	0	1.25219	0	0	0	0	0	0	0	0	0	0	0	0	0	0	0	0	0	0	0	0	0	0	0	0	0	0	1.2835	0	2.53569	EXOMESEQ: Li_26030808, RNASEQ: Yuon_chou_37507442_deg_day14
TBCE	0	0	1.25219	0	0	0	0	0	0	0	0	0	0	0	0	0	0	0	0	0	0	0	0	0	0	0	0	0	0	1.28318	0	2.53537	EXOMESEQ: Li_26030808, RNASEQ: Yuon_chou_37507442_deg_day14
GABPB2	0	0	1.25219	0	0	0	0	0	0	0	0	0	0	0	0	0	0	0	0	0	0	0	0	0	0	0	0	0	0	1.28302	0	2.53521	EXOMESEQ: Li_26030808, RNASEQ: Yuon_chou_37507442_deg_day14
ATP6V0D2	0	0	0	0	0	0	0	0	0	0	0	0	1.38749	0	0	0	0	0	0	0	0	0	0	0	0	0	0	1.14708	0	0	0	2.53457	MICROARRAY: Bharracharya_22723293, RNASEQ: Yuon_chou_37507442_cpg_day28
DCTN2	0	0	0	0	0	0	0	0	0	0	0	0	0	0	0	0	0	0	0	0	0	1.29875	0	0	0	0	0	0	1.23544	0	0	2.53419	RNASEQ: Yuon_chou_37507442_deg_cord, MICROARRAY: Windhorst_37090732
ATP6V0E2	0	0	0	0	0	0	0	0	0	0	0	0	0	0	0	0	0	0	0	0	0	1.29875	0	0	0	0	0	0	1.22445	1.23538	0	2.53413	RNASEQ: Yuon_chou_37507442_deg_day14, MICROARRAY: Windhorst_37090732
TRAF5	0	0	1.25219	0	0	0	0	0	0	0	0	0	0	0	0	0	0	0	0	0	0	0	0	0	0	0	0	0	1.24792	1.28176	0	2.53395	EXOMESEQ: Li_26030808, RNASEQ: Yuon_chou_37507442_deg_day14
GNG11	0	0	0	0	0	0	0	0	0	0	0	0	0	0	0	0	0	0	0	0	0	1.29875	0	0	0	0	0	0	1.23514	0	0	2.53389	RNASEQ: Yuon_chou_37507442_deg_cord, MICROARRAY: Windhorst_37090732
CCL17	0	0	0	0	0	0	0	0	0	0	0	0	1.38749	0	0	0	0	0	0	0	0	0	0	0	0	0	0	1.14607	0	0	0	2.53356	MICROARRAY: Bharracharya_22723293, RNASEQ: Yuon_chou_37507442_cpg_day28
ATAD3B	0	0	1.25219	0	0	0	0	0	0	0	0	0	0	0	0	0	0	0	0	0	0	0	0	0	0	0	0	0	0	1.28114	0	2.53333	EXOMESEQ: Li_26030808, RNASEQ: Yuon_chou_37507442_deg_day14
ARHGAP22	0	0	0	0	0	0	0	0	0	0	0	0	0	0	1.31071	0	0	0	0	0	0	0	0	0	0	0	1.15721	0	1.22182	0	0	2.53253	RNASEQ: Yuon_chou_37507442_deg_cord, MICROARRAY: Fulton_30459472
SIGLEC6	0	0	0	0	0	0	0	0	0	0	0	0	1.38749	0	0	0	0	0	0	0	0	0	0	0	0	0	0	1.14459	0	0	0	2.53207	MICROARRAY: Bharracharya_22723293, RNASEQ: Yuon_chou_37507442_cpg_day28
ZNF256	0	0	0	0	0	0	0	0	0	0	0	0	0	0	0	0	0	0	0	0	0	1.29875	0	0	0	0	0	0	1.23309	0	0	2.53185	RNASEQ: Yuon_chou_37507442_deg_cord, MICROARRAY: Windhorst_37090732
TRIB2	0	0	1.25219	0	0	0	0	0	0	0	0	0	0	0	0	0	0	0	0	0	0	0	0	0	0	0	0	0	1.24068	1.27888	0	2.53107	EXOMESEQ: Li_26030808, RNASEQ: Yuon_chou_37507442_deg_day14
HPS4	1.22988	0	0	0	0	0	0	0	0	0	0	0	0	0	0	0	0	0	0	0	0	0	0	0	0	0	0	1.14574	0	1.30079	0	2.53067	EXOMESEQ: Dai_34276789_data, RNASEQ: Yuon_chou_37507442_deg_day14
TNFRSF8	0	0	1.25219	0	0	0	0	0	0	0	0	0	0	0	0	0	0	0	0	0	0	0	0	0	0	0	1.16614	1.14558	0	1.27772	0	2.52991	EXOMESEQ: Li_26030808, RNASEQ: Yuon_chou_37507442_deg_day14
FHOD3	0	0	0	0	0	0	0	0	0	0	0	0	0	0	1.31071	0	0	0	0	0	0	0	0	0	0	0	0	0	1.21907	0	0	2.52978	RNASEQ: Yuon_chou_37507442_deg_cord, MICROARRAY: Fulton_30459472
C1orf50	0	0	1.25219	0	0	0	0	0	0	0	0	0	0	0	0	0	0	0	0	0	0	0	0	0	0	0	0	0	0	1.27535	0	2.52753	EXOMESEQ: Li_26030808, RNASEQ: Yuon_chou_37507442_deg_day14
CCNA1	0	0	0	0	0	0	0	0	0	0	0	0	0	0	0	1.33428	0	0	0	0	0	0	0	0	0	0	0	1.1928	0	0	0	2.52707	MICROARRAY: Gong_32412065, RNASEQ: Yuon_chou_37507442_cpg_day28
IMPA2	0	0	0	0	0	0	0	0	0	0	0	0	0	0	0	0	0	0	0	0	0	1.29875	0	0	0	0	0	1.22694	0	0	0	2.5257	MICROARRAY: Windhorst_37090732, RNASEQ: Yuon_chou_37507442_cpg_day28
ORC1	0	0	1.25219	0	0	0	0	0	0	0	0	0	0	0	0	0	0	0	0	0	0	0	0	0	0	0	0	1.14589	1.21415	1.27335	0	2.52553	EXOMESEQ: Li_26030808, RNASEQ: Yuon_chou_37507442_deg_day14
NCAPH	0	0	1.25219	0	0	0	0	0	0	0	0	0	0	0	0	0	0	0	0	0	0	0	0	0	0	0	0	0	1.25241	1.27309	0	2.52528	EXOMESEQ: Li_26030808, RNASEQ: Yuon_chou_37507442_deg_day14
POLR3C	0	0	1.25219	0	0	0	0	0	0	0	0	0	0	0	0	0	0	0	0	0	0	0	0	0	0	0	0	0	0	1.27257	0	2.52476	EXOMESEQ: Li_26030808, RNASEQ: Yuon_chou_37507442_deg_day14
KLF5	0	0	0	0	0	0	0	0	0	0	0	0	0	0	0	0	0	0	0	0	0	1.29875	0	0	0	0	0	0	1.22532	0	0	2.52408	RNASEQ: Yuon_chou_37507442_deg_cord, MICROARRAY: Windhorst_37090732
LEFTY2	0	0	1.25219	0	0	0	0	0	0	0	0	0	0	0	0	0	0	0	0	0	0	0	0	0	0	0	0	0	1.27099	0	0	2.52318	EXOMESEQ: Li_26030808, RNASEQ: Yuon_chou_37507442_deg_cord
PLPP5	0	0	0	0	0	0	0	0	0	0	0	0	0	0	0	1.36256	0	0	0	0	0	0	0	0	0	0	1.15952	0	0	0	0	2.52208	MICROARRAY: Gong_32412065, RNASEQ: Yuon_chou_37507442_cpg_day14
BCL7A	0	0	0	0	0	0	0	0	0	0	0	0	0	0	0	1.36732	0	0	0	0	0	0	0	0	0	0	1.15344	0	0	0	0	2.52075	MICROARRAY: Gong_32412065, RNASEQ: Yuon_chou_37507442_cpg_day14
SARDH	0	0	0	0	0	0	0	0	0	0	0	0	0	0	0	0	0	0	0	0	0	1.29875	0	0	0	0	1.17141	0	1.22168	0	0	2.52043	RNASEQ: Yuon_chou_37507442_deg_cord, MICROARRAY: Windhorst_37090732
PGM2	0	0	0	0	0	0	0	0	0	1.29872	0	0	0	0	0	0	0	0	0	0	0	0	0	0	0	0	0	0	1.22061	0	0	2.51932	RNASEQ: Yuon_chou_37507442_deg_cord, MASS_SPEC: Ahmed_37839510
ZFP36	0	0	0	0	0	0	0	0	0	0	0	0	0	0	0	0	0	0	0	0	0	1.29875	0	0	0	0	0	0	1.22043	0	0	2.51918	RNASEQ: Yuon_chou_37507442_deg_cord, MICROARRAY: Windhorst_37090732
CENPF	0	0	1.25219	0	0	0	0	0	0	0	0	0	0	0	0	0	0	0	0	0	0	0	0	0	0	0	0	0	0	1.26651	0	2.5187	EXOMESEQ: Li_26030808, RNASEQ: Yuon_chou_37507442_deg_day14
SLAMF1	0	0	1.25219	0	0	0	0	0	0	0	0	0	0	0	0	0	0	0	0	0	0	0	0	0	0	0	1.16709	0	1.26574	0	0	2.51793	EXOMESEQ: Li_26030808, RNASEQ: Yuon_chou_37507442_deg_cord
C2orf42	0	0	1.25219	0	0	0	0	0	0	0	0	0	0	0	0	0	0	0	0	0	0	0	0	0	0	0	0	0	0	1.26416	0	2.51635	EXOMESEQ: Li_26030808, RNASEQ: Yuon_chou_37507442_deg_day14
NPHP4	0	0	1.25219	0	0	0	0	0	0	0	0	0	0	0	0	0	0	0	0	0	0	0	0	0	0	0	0	0	1.26396	0	0	2.51614	EXOMESEQ: Li_26030808, RNASEQ: Yuon_chou_37507442_deg_cord
LAX1	0	0	1.25219	0	0	0	0	0	0	0	0	0	0	0	0	0	0	0	0	0	0	0	0	0	0	0	0	0	1.22397	1.26375	0	2.51593	EXOMESEQ: Li_26030808, RNASEQ: Yuon_chou_37507442_deg_day14
CD40	0	0	0	0	0	0	0	0	0	0	0	0	0	0	0	1.35804	0	0	0	0	0	0	0	0	0	0	1.15777	0	0	0	0	2.51581	MICROARRAY: Gong_32412065, RNASEQ: Yuon_chou_37507442_cpg_day14
GPR183	0	0	0	0	0	0	0	0	0	0	0	0	0	0	0	0	0	0	0	0	0	1.29875	0	0	0	0	1.14817	0	1.21611	0	0	2.51487	RNASEQ: Yuon_chou_37507442_deg_cord, MICROARRAY: Windhorst_37090732
HFM1	0	0	1.25219	0	0	0	0	0	0	0	0	0	0	0	0	0	0	0	0	0	0	0	0	0	0	0	0	1.26237	0	0	0	2.51455	EXOMESEQ: Li_26030808, RNASEQ: Yuon_chou_37507442_cpg_day28
DUS2	0	0	0	0	0	0	0	0	0	0	0	0	0	0	0	0	0	0	0	0	0	1.29875	0	0	0	0	0	0	1.21506	0	0	2.51382	RNASEQ: Yuon_chou_37507442_deg_cord, MICROARRAY: Windhorst_37090732
SCNM1	0	0	1.25219	0	0	0	0	0	0	0	0	0	0	0	0	0	0	0	0	0	0	0	0	0	0	0	0	0	0	1.26156	0	2.51374	EXOMESEQ: Li_26030808, RNASEQ: Yuon_chou_37507442_deg_day14
KIF2C	0	0	1.25219	0	0	0	0	0	0	0	0	0	0	0	0	0	0	0	0	0	0	0	0	0	0	0	0	0	0	1.25868	0	2.51086	EXOMESEQ: Li_26030808, RNASEQ: Yuon_chou_37507442_deg_day14
ERRFI1	0	0	1.25219	0	0	0	0	0	0	0	0	0	0	0	0	0	0	0	0	0	0	0	0	0	0	0	0	1.14657	1.25854	0	0	2.51073	EXOMESEQ: Li_26030808, RNASEQ: Yuon_chou_37507442_deg_cord
DNAJC16	0	0	1.25219	0	0	0	0	0	0	0	0	0	0	0	0	0	0	0	0	0	0	0	0	0	0	0	0	0	0	1.25832	0	2.51051	EXOMESEQ: Li_26030808, RNASEQ: Yuon_chou_37507442_deg_day14
TNFRSF9	0	0	1.25219	0	0	0	0	0	0	0	0	0	0	0	0	0	0	0	0	0	0	0	0	0	0	0	0	0	0	1.2578	0	2.50998	EXOMESEQ: Li_26030808, RNASEQ: Yuon_chou_37507442_deg_day14
AUNIP	0	0	1.25219	0	0	0	0	0	0	0	0	0	0	0	0	0	0	0	0	0	0	0	0	0	0	0	0	0	1.25726	0	0	2.50944	EXOMESEQ: Li_26030808, RNASEQ: Yuon_chou_37507442_deg_cord
SYNPO	0	0	0	0	0	0	0	0	0	0	0	0	0	0	0	1.3573	0	0	0	0	0	0	0	0	0	0	1.15181	1.14547	0	0	0	2.5091	MICROARRAY: Gong_32412065, RNASEQ: Yuon_chou_37507442_cpg_day14
IL18RAP	0	0	1.25219	0	0	0	0	0	0	0	0	0	0	0	0	0	0	0	0	0	0	0	0	0	0	0	0	0	1.25673	1.25258	0	2.50892	EXOMESEQ: Li_26030808, RNASEQ: Yuon_chou_37507442_deg_cord
DTL	0	0	1.25219	0	0	0	0	0	0	0	0	0	0	0	0	0	0	0	0	0	0	0	0	0	0	0	0	0	0	1.2566	0	2.50879	EXOMESEQ: Li_26030808, RNASEQ: Yuon_chou_37507442_deg_day14
NRXN1	0	0	1.25219	0	0	0	0	0	0	0	0	0	0	0	0	0	0	0	0	0	0	0	0	0	0	0	0	0	0	1.25643	0	2.50862	EXOMESEQ: Li_26030808, RNASEQ: Yuon_chou_37507442_deg_day14
IFI44L	0	0	1.25219	0	0	0	0	0	0	0	0	0	0	0	0	0	0	0	0	0	0	0	0	0	0	0	0	0	0	1.2561	0	2.50829	EXOMESEQ: Li_26030808, RNASEQ: Yuon_chou_37507442_deg_day14
LCK	0	0	1.25219	0	0	0	0	0	0	0	0	0	0	0	0	0	0	0	0	0	0	0	0	0	0	0	0	0	1.24272	1.25602	0	2.50821	EXOMESEQ: Li_26030808, RNASEQ: Yuon_chou_37507442_deg_day14
TMEM69	0	0	1.25219	0	0	0	0	0	0	0	0	0	0	0	0	0	0	0	0	0	0	0	0	0	0	0	0	0	1.25541	0	0	2.5076	EXOMESEQ: Li_26030808, RNASEQ: Yuon_chou_37507442_deg_cord
HSPA6	0	0	1.25219	0	0	0	0	0	0	0	0	0	0	0	0	0	0	0	0	0	0	0	0	0	0	0	0	1.25458	0	0	0	2.50676	EXOMESEQ: Li_26030808, RNASEQ: Yuon_chou_37507442_cpg_day28
HLA-DRA	0	0	0	0	0	0	0	0	0	0	0	0	0	0	0	1.34624	0	0	0	0	0	0	0	0	0	0	1.1604	0	0	0	0	2.50663	MICROARRAY: Gong_32412065, RNASEQ: Yuon_chou_37507442_cpg_day14
EPS15	0	0	1.25219	0	0	0	0	0	0	0	0	0	0	0	0	0	0	0	0	0	0	0	0	0	0	0	0	0	0	1.25441	0	2.5066	EXOMESEQ: Li_26030808, RNASEQ: Yuon_chou_37507442_deg_day14
TAS1R3	0	0	1.25219	0	0	0	0	0	0	0	0	0	0	0	0	0	0	0	0	0	0	0	0	0	0	0	0	0	1.25362	0	0	2.50581	EXOMESEQ: Li_26030808, RNASEQ: Yuon_chou_37507442_deg_cord
KCNJ15	0	0	0	0	0	0	0	0	0	0	0	0	0	0	0	1.34482	0	0	0	0	0	0	0	0	0	0	1.16018	0	0	0	0	2.505	MICROARRAY: Gong_32412065, RNASEQ: Yuon_chou_37507442_cpg_day14
SH3PXD2A	0	0	0	0	0	0	0	0	0	0	0	0	0	0	0	1.33736	0	0	0	0	0	0	0	0	0	0	1.1675	0	0	0	0	2.50487	MICROARRAY: Gong_32412065, RNASEQ: Yuon_chou_37507442_cpg_day14
MCF2L	0	0	0	0	0	0	0	0	0	0	0	0	0	0	0	1.33523	0	0	0	0	0	0	0	0	0	0	1.16941	1.14594	0	0	0	2.50464	MICROARRAY: Gong_32412065, RNASEQ: Yuon_chou_37507442_cpg_day14
JAK1	0	0	1.25219	0	0	0	0	0	0	0	0	0	0	0	0	0	0	0	0	0	0	0	0	0	0	0	0	0	0	1.25177	0	2.50396	EXOMESEQ: Li_26030808, RNASEQ: Yuon_chou_37507442_deg_day14
SETDB1	0	0	1.25219	0	0	0	0	0	0	0	0	0	0	0	0	0	0	0	0	0	0	0	0	0	0	0	0	0	1.25165	0	0	2.50384	EXOMESEQ: Li_26030808, RNASEQ: Yuon_chou_37507442_deg_cord
ZNF532	0	0	0	0	0	0	0	0	0	0	0	0	0	0	0	1.34804	0	0	0	0	0	0	0	0	0	0	1.15551	0	0	0	0	2.50355	MICROARRAY: Gong_32412065, RNASEQ: Yuon_chou_37507442_cpg_day14
ZC3H6	0	0	1.25219	0	0	0	0	0	0	0	0	0	0	0	0	0	0	0	0	0	0	0	0	0	0	0	0	0	1.25129	0	0	2.50348	EXOMESEQ: Li_26030808, RNASEQ: Yuon_chou_37507442_deg_cord
AMY2B	0	0	1.25219	0	0	0	0	0	0	0	0	0	0	0	0	0	0	0	0	0	0	0	0	0	0	0	0	0	1.22715	1.25091	0	2.5031	EXOMESEQ: Li_26030808, RNASEQ: Yuon_chou_37507442_deg_day14
TNFSF4	0	0	1.25219	0	0	0	0	0	0	0	0	0	0	0	0	0	0	0	0	0	0	0	0	0	0	0	0	0	1.22642	1.25049	0	2.50268	EXOMESEQ: Li_26030808, RNASEQ: Yuon_chou_37507442_deg_day14
R3HDM1	0	0	1.25219	0	0	0	0	0	0	0	0	0	0	0	0	0	0	0	0	0	0	0	0	0	0	0	0	0	0	1.25042	0	2.50261	EXOMESEQ: Li_26030808, RNASEQ: Yuon_chou_37507442_deg_day14
GPBP1L1	0	0	1.25219	0	0	0	0	0	0	0	0	0	0	0	0	0	0	0	0	0	0	0	0	0	0	0	1.14892	0	0	1.25022	0	2.5024	EXOMESEQ: Li_26030808, RNASEQ: Yuon_chou_37507442_deg_day14
NMI	0	0	1.25219	0	0	0	0	0	0	0	0	0	0	0	0	0	0	0	0	0	0	0	0	0	0	0	0	0	0	1.24954	0	2.50172	EXOMESEQ: Li_26030808, RNASEQ: Yuon_chou_37507442_deg_day14
LZTS1	0	0	0	0	0	0	0	0	0	0	0	0	0	0	0	1.35767	0	0	0	0	0	0	0	0	0	0	0	1.14372	0	0	0	2.50139	MICROARRAY: Gong_32412065, RNASEQ: Yuon_chou_37507442_cpg_day28
ZNF683	0	0	1.25219	0	0	0	0	0	0	0	0	0	0	0	0	0	0	0	0	0	0	0	0	0	0	0	0	1.24908	0	0	0	2.50127	EXOMESEQ: Li_26030808, RNASEQ: Yuon_chou_37507442_cpg_day28
MACROD2	0	0	0	0	0	0	0	0	0	0	0	0	0	0	0	1.33861	0	0	0	0	0	0	0	0	0	0	0	1.16219	0	0	0	2.5008	MICROARRAY: Gong_32412065, RNASEQ: Yuon_chou_37507442_cpg_day28
PRDM1	0	0	0	0	0	0	0	0	0	0	0	0	0	0	0	1.33231	0	0	0	0	0	0	0	0	0	0	1.16743	1.15087	0	0	0	2.49974	MICROARRAY: Gong_32412065, RNASEQ: Yuon_chou_37507442_cpg_day14
KLF11	0	0	1.25219	0	0	0	0	0	0	0	0	0	0	0	0	0	0	0	0	0	0	0	0	0	0	0	0	0	0	1.24738	0	2.49957	EXOMESEQ: Li_26030808, RNASEQ: Yuon_chou_37507442_deg_day14
CASP9	0	0	1.25219	0	0	0	0	0	0	0	0	0	0	0	0	0	0	0	0	0	0	0	0	0	0	0	0	1.14444	1.24669	0	0	2.49888	EXOMESEQ: Li_26030808, RNASEQ: Yuon_chou_37507442_deg_cord
CYTIP	0	0	1.25219	0	0	0	0	0	0	0	0	0	0	0	0	0	0	0	0	0	0	0	0	0	0	0	0	0	1.24646	0	0	2.49865	EXOMESEQ: Li_26030808, RNASEQ: Yuon_chou_37507442_deg_cord
CD48	0	0	1.25219	0	0	0	0	0	0	0	0	0	0	0	0	0	0	0	0	0	0	0	0	0	0	0	0	0	1.24553	0	0	2.49772	EXOMESEQ: Li_26030808, RNASEQ: Yuon_chou_37507442_deg_cord
TARBP1	0	0	1.25219	0	0	0	0	0	0	0	0	0	0	0	0	0	0	0	0	0	0	0	0	0	0	0	0	0	0	1.24543	0	2.49762	EXOMESEQ: Li_26030808, RNASEQ: Yuon_chou_37507442_deg_day14
ASXL2	0	0	1.25219	0	0	0	0	0	0	0	0	0	0	0	0	0	0	0	0	0	0	0	0	0	0	0	0	0	1.24514	0	0	2.49732	EXOMESEQ: Li_26030808, RNASEQ: Yuon_chou_37507442_deg_cord
PPOX	0	0	1.25219	0	0	0	0	0	0	0	0	0	0	0	0	0	0	0	0	0	0	0	0	0	0	0	0	0	0	1.24473	0	2.49692	EXOMESEQ: Li_26030808, RNASEQ: Yuon_chou_37507442_deg_day14
GBP3	0	0	1.25219	0	0	0	0	0	0	0	0	0	0	0	0	0	0	0	0	0	0	0	0	0	0	0	0	0	1.24411	0	0	2.4963	EXOMESEQ: Li_26030808, RNASEQ: Yuon_chou_37507442_deg_cord
URB2	0	0	1.25219	0	0	0	0	0	0	0	0	0	0	0	0	0	0	0	0	0	0	0	0	0	0	0	0	1.24387	0	1.23503	0	2.49606	EXOMESEQ: Li_26030808, RNASEQ: Yuon_chou_37507442_cpg_day28
NME9	0	0	0	0	0	0	0	0	0	0	0	0	0	0	0	1.33235	0	0	0	0	0	0	0	0	0	0	1.16319	0	0	0	0	2.49553	MICROARRAY: Gong_32412065, RNASEQ: Yuon_chou_37507442_cpg_day14
P2RY14	0	0	0	0	0	0	0	0	0	0	0	0	0	0	0	1.33546	0	0	0	0	0	0	0	0	0	0	1.15973	0	0	0	0	2.49519	MICROARRAY: Gong_32412065, RNASEQ: Yuon_chou_37507442_cpg_day14
POLR1B	0	0	1.25219	0	0	0	0	0	0	0	0	0	0	0	0	0	0	0	0	0	0	0	0	0	0	0	0	1.14469	1.22686	1.24283	0	2.49501	EXOMESEQ: Li_26030808, RNASEQ: Yuon_chou_37507442_deg_day14
ARHGEF10	0	0	0	0	0	0	0	0	0	0	0	0	0	0	0	1.33904	0	0	0	0	0	0	0	0	0	0	1.15589	0	0	0	0	2.49493	MICROARRAY: Gong_32412065, RNASEQ: Yuon_chou_37507442_cpg_day14
EYA3	0	0	1.25219	0	0	0	0	0	0	0	0	0	0	0	0	0	0	0	0	0	0	0	0	0	0	0	0	0	0	1.24223	0	2.49442	EXOMESEQ: Li_26030808, RNASEQ: Yuon_chou_37507442_deg_day14
NECTIN4	0	0	1.25219	0	0	0	0	0	0	0	0	0	0	0	0	0	0	0	0	0	0	0	0	0	0	0	0	0	1.24217	0	0	2.49436	EXOMESEQ: Li_26030808, RNASEQ: Yuon_chou_37507442_deg_cord
SDC1	0	0	1.25219	0	0	0	0	0	0	0	0	0	0	0	0	0	0	0	0	0	0	0	0	0	0	0	0	0	1.24204	0	0	2.49423	EXOMESEQ: Li_26030808, RNASEQ: Yuon_chou_37507442_deg_cord
FADS3	0	0	0	0	0	0	0	0	0	0	0	0	0	0	0	1.34711	0	0	0	0	0	0	0	0	0	0	0	1.14672	0	0	0	2.49384	MICROARRAY: Gong_32412065, RNASEQ: Yuon_chou_37507442_cpg_day28
CAPN2	0	0	1.25219	0	0	0	0	0	0	0	0	0	0	0	0	0	0	0	0	0	0	0	0	0	0	0	0	0	1.24131	0	0	2.4935	EXOMESEQ: Li_26030808, RNASEQ: Yuon_chou_37507442_deg_cord
PFKFB2	0	0	1.25219	0	0	0	0	0	0	0	0	0	0	0	0	0	0	0	0	0	0	0	0	0	0	0	0	0	0	1.24118	0	2.49337	EXOMESEQ: Li_26030808, RNASEQ: Yuon_chou_37507442_deg_day14
PRKD3	0	0	1.25219	0	0	0	0	0	0	0	0	0	0	0	0	0	0	0	0	0	0	0	0	0	0	0	0	0	0	1.24087	0	2.49306	EXOMESEQ: Li_26030808, RNASEQ: Yuon_chou_37507442_deg_day14
GTDC1	0	0	1.25219	0	0	0	0	0	0	0	0	0	0	0	0	0	0	0	0	0	0	0	0	0	0	0	0	0	0	1.24072	0	2.49291	EXOMESEQ: Li_26030808, RNASEQ: Yuon_chou_37507442_deg_day14
SORT1	0	0	1.25219	0	0	0	0	0	0	0	0	0	0	0	0	0	0	0	0	0	0	0	0	0	0	0	0	0	0	1.24007	0	2.49225	EXOMESEQ: Li_26030808, RNASEQ: Yuon_chou_37507442_deg_day14
DPYD	0	0	1.25219	0	0	0	0	0	0	0	0	0	0	0	0	0	0	0	0	0	0	0	0	0	0	0	0	0	1.23994	0	0	2.49213	EXOMESEQ: Li_26030808, RNASEQ: Yuon_chou_37507442_deg_cord
TP53BP2	0	0	1.25219	0	0	0	0	0	0	0	0	0	0	0	0	0	0	0	0	0	0	0	0	0	0	0	0	0	1.22109	1.23992	0	2.4921	EXOMESEQ: Li_26030808, RNASEQ: Yuon_chou_37507442_deg_day14
EIF2AK3	0	0	1.25219	0	0	0	0	0	0	0	0	0	0	0	0	0	0	0	0	0	0	0	0	0	0	0	0	0	0	1.23987	0	2.49205	EXOMESEQ: Li_26030808, RNASEQ: Yuon_chou_37507442_deg_day14
MFSD2A	0	0	1.25219	0	0	0	0	0	0	0	0	0	0	0	0	0	0	0	0	0	0	0	0	0	0	0	0	0	1.2396	0	0	2.49178	EXOMESEQ: Li_26030808, RNASEQ: Yuon_chou_37507442_deg_cord
UBE2J2	0	0	1.25219	0	0	0	0	0	0	0	0	0	0	0	0	0	0	0	0	0	0	0	0	0	0	0	0	0	0	1.23938	0	2.49156	EXOMESEQ: Li_26030808, RNASEQ: Yuon_chou_37507442_deg_day14
REV1	0	0	1.25219	0	0	0	0	0	0	0	0	0	0	0	0	0	0	0	0	0	0	0	0	0	0	0	0	0	1.23898	0	0	2.49116	EXOMESEQ: Li_26030808, RNASEQ: Yuon_chou_37507442_deg_cord
ARHGEF19	0	0	1.25219	0	0	0	0	0	0	0	0	0	0	0	0	0	0	0	0	0	0	0	0	0	0	0	0	0	1.23864	0	0	2.49083	EXOMESEQ: Li_26030808, RNASEQ: Yuon_chou_37507442_deg_cord
MACF1	0	0	1.25219	0	0	0	0	0	0	0	0	0	0	0	0	0	0	0	0	0	0	0	0	0	0	0	1.1476	0	1.23861	0	0	2.4908	EXOMESEQ: Li_26030808, RNASEQ: Yuon_chou_37507442_deg_cord
SNORA28	0	0	0	0	0	0	0	0	0	0	0	0	0	0	0	1.33571	0	0	0	0	0	0	0	0	0	0	1.15474	0	0	0	0	2.49045	MICROARRAY: Gong_32412065, RNASEQ: Yuon_chou_37507442_cpg_day14
GON4L	0	0	1.25219	0	0	0	0	0	0	0	0	0	0	0	0	0	0	0	0	0	0	0	0	0	0	0	0	0	0	1.23808	0	2.49027	EXOMESEQ: Li_26030808, RNASEQ: Yuon_chou_37507442_deg_day14
IBA57	0	0	1.25219	0	0	0	0	0	0	0	0	0	0	0	0	0	0	0	0	0	0	0	0	0	0	0	0	0	0	1.23804	0	2.49022	EXOMESEQ: Li_26030808, RNASEQ: Yuon_chou_37507442_deg_day14
AMIGO1	0	0	1.25219	0	0	0	0	0	0	0	0	0	0	0	0	0	0	0	0	0	0	0	0	0	0	0	0	0	1.23803	1.23572	0	2.49022	EXOMESEQ: Li_26030808, RNASEQ: Yuon_chou_37507442_deg_cord
KLHDC4	0	0	0	0	0	0	0	0	0	0	0	0	0	0	0	0	0	0	0	0	0	1.29875	0	0	0	0	0	1.19124	0	0	0	2.48999	MICROARRAY: Windhorst_37090732, RNASEQ: Yuon_chou_37507442_cpg_day28
HDAC9	0	0	0	0	0	0	0	0	0	0	0	0	0	0	0	1.34463	0	0	0	0	0	0	0	0	0	0	0	1.14529	0	0	0	2.48992	MICROARRAY: Gong_32412065, RNASEQ: Yuon_chou_37507442_cpg_day28
RGL1	0	0	1.25219	0	0	0	0	0	0	0	0	0	0	0	0	0	0	0	0	0	0	0	0	0	0	0	1.15404	0	1.23755	0	0	2.48974	EXOMESEQ: Li_26030808, RNASEQ: Yuon_chou_37507442_deg_cord
AHCTF1	0	0	1.25219	0	0	0	0	0	0	0	0	0	0	0	0	0	0	0	0	0	0	0	0	0	0	0	0	0	0	1.23752	0	2.48971	EXOMESEQ: Li_26030808, RNASEQ: Yuon_chou_37507442_deg_day14
DDX18	0	0	1.25219	0	0	0	0	0	0	0	0	0	0	0	0	0	0	0	0	0	0	0	0	0	0	0	0	1.14371	0	1.23739	0	2.48957	EXOMESEQ: Li_26030808, RNASEQ: Yuon_chou_37507442_deg_day14
TLR5	0	0	1.25219	0	0	0	0	0	0	0	0	0	0	0	0	0	0	0	0	0	0	0	0	0	0	0	0	0	1.23676	0	0	2.48895	EXOMESEQ: Li_26030808, RNASEQ: Yuon_chou_37507442_deg_cord
KIAA1522	0	0	1.25219	0	0	0	0	0	0	0	0	0	0	0	0	0	0	0	0	0	0	0	0	0	0	0	0	0	1.23669	0	0	2.48888	EXOMESEQ: Li_26030808, RNASEQ: Yuon_chou_37507442_deg_cord
CD53	0	0	1.25219	0	0	0	0	0	0	0	0	0	0	0	0	0	0	0	0	0	0	0	0	0	0	0	0	0	1.2363	0	0	2.48849	EXOMESEQ: Li_26030808, RNASEQ: Yuon_chou_37507442_deg_cord
PACC1	0	0	1.25219	0	0	0	0	0	0	0	0	0	0	0	0	0	0	0	0	0	0	0	0	0	0	0	0	0	0	1.2363	0	2.48849	EXOMESEQ: Li_26030808, RNASEQ: Yuon_chou_37507442_deg_day14
TNFRSF25	0	0	1.25219	0	0	0	0	0	0	0	0	0	0	0	0	0	0	0	0	0	0	0	0	0	0	0	0	0	1.23586	0	0	2.48804	EXOMESEQ: Li_26030808, RNASEQ: Yuon_chou_37507442_deg_cord
OCA2	0	0	0	0	0	0	0	0	0	0	0	0	0	0	0	0	0	0	0	0	0	1.29875	0	0	0	0	0	1.18899	0	0	0	2.48775	MICROARRAY: Windhorst_37090732, RNASEQ: Yuon_chou_37507442_cpg_day28
PPFIA4	0	0	1.25219	0	0	0	0	0	0	0	0	0	0	0	0	0	0	0	0	0	0	0	0	0	0	0	0	0	1.23531	0	0	2.48749	EXOMESEQ: Li_26030808, RNASEQ: Yuon_chou_37507442_deg_cord
WARS2	0	0	1.25219	0	0	0	0	0	0	0	0	0	0	0	0	0	0	0	0	0	0	0	0	0	0	0	0	0	0	1.23529	0	2.48748	EXOMESEQ: Li_26030808, RNASEQ: Yuon_chou_37507442_deg_day14
LCLAT1	0	0	1.25219	0	0	0	0	0	0	0	0	0	0	0	0	0	0	0	0	0	0	0	0	0	0	0	0	0	0	1.2352	0	2.48739	EXOMESEQ: Li_26030808, RNASEQ: Yuon_chou_37507442_deg_day14
FAM178B	0	0	1.25219	0	0	0	0	0	0	0	0	0	0	0	0	0	0	0	0	0	0	0	0	0	0	0	0	0	1.2346	0	0	2.48679	EXOMESEQ: Li_26030808, RNASEQ: Yuon_chou_37507442_deg_cord
CRNN	0	0	1.25219	0	0	0	0	0	0	0	0	0	0	0	0	0	0	0	0	0	0	0	0	1.23453	0	0	0	0	0	0	0	2.48672	EXOMESEQ: Li_26030808, RNASEQ: Oji_mmuo_33177681_mRNA
CCT3	0	0	1.25219	0	0	0	0	0	0	0	0	0	0	0	0	0	0	0	0	0	0	0	0	0	0	0	0	0	1.23422	0	0	2.48641	EXOMESEQ: Li_26030808, RNASEQ: Yuon_chou_37507442_deg_cord
ATP8B2	0	0	1.25219	0	0	0	0	0	0	0	0	0	0	0	0	0	0	0	0	0	0	0	0	0	0	0	0	0	1.23361	0	0	2.4858	EXOMESEQ: Li_26030808, RNASEQ: Yuon_chou_37507442_deg_cord
MRPL24	0	0	1.25219	0	0	0	0	0	0	0	0	0	0	0	0	0	0	0	0	0	0	0	0	0	0	0	0	0	1.23351	0	0	2.4857	EXOMESEQ: Li_26030808, RNASEQ: Yuon_chou_37507442_deg_cord
KDR	0	0	0	0	0	0	0	0	0	0	0	0	0	1.33314	0	0	0	0	0	0	0	0	0	0	0	0	1.15254	0	0	0	0	2.48568	MICROARRAY: Da_paepe_20718599, RNASEQ: Yuon_chou_37507442_cpg_day14
SDCCAG8	0	0	1.25219	0	0	0	0	0	0	0	0	0	0	0	0	0	0	0	0	0	0	0	0	0	0	0	0	0	1.23336	0	0	2.48555	EXOMESEQ: Li_26030808, RNASEQ: Yuon_chou_37507442_deg_cord
ABRA	0	0	0	0	0	0	0	0	0	0	0	0	0	0	0	1.33626	0	0	0	0	0	0	0	0	0	0	1.1492	0	0	0	0	2.48545	MICROARRAY: Gong_32412065, RNASEQ: Yuon_chou_37507442_cpg_day14
PSRC1	0	0	1.25219	0	0	0	0	0	0	0	0	0	0	0	0	0	0	0	0	0	0	0	0	0	0	0	0	0	1.2332	0	0	2.48538	EXOMESEQ: Li_26030808, RNASEQ: Yuon_chou_37507442_deg_cord
MAP3K21	0	0	1.25219	0	0	0	0	0	0	0	0	0	0	0	0	0	0	0	0	0	0	0	0	0	0	0	0	1.14458	1.2326	0	0	2.48479	EXOMESEQ: Li_26030808, RNASEQ: Yuon_chou_37507442_deg_cord
EIF2D	0	0	1.25219	0	0	0	0	0	0	0	0	0	0	0	0	0	0	0	0	0	0	0	0	0	0	0	0	0	1.23246	0	0	2.48464	EXOMESEQ: Li_26030808, RNASEQ: Yuon_chou_37507442_deg_cord
THRB	0	0	0	0	0	0	0	0	0	0	0	0	0	0	0	1.33372	0	0	0	0	0	0	0	0	0	0	1.15071	0	0	0	0	2.48443	MICROARRAY: Gong_32412065, RNASEQ: Yuon_chou_37507442_cpg_day14
TCTEX1D4	0	0	1.25219	0	0	0	0	0	0	0	0	0	0	0	0	0	0	0	0	0	0	0	0	1.23216	0	0	0	0	0	0	0	2.48435	EXOMESEQ: Li_26030808, RNASEQ: Oji_mmuo_33177681_mRNA
RIMS2	0	1.22591	0	0	0	0	0	0	0	0	0	0	0	0	0	0	0	0	0	0	0	0	0	0	0	0	0	0	1.25798	0	0	2.48389	EXOMESEQ: Hamvas_30342483, RNASEQ: Yuon_chou_37507442_deg_cord
GREB1	0	0	1.25219	0	0	0	0	0	0	0	0	0	0	0	0	0	0	0	0	0	0	0	0	0	0	0	0	0	1.23149	0	0	2.48368	EXOMESEQ: Li_26030808, RNASEQ: Yuon_chou_37507442_deg_cord
PTPN14	0	0	1.25219	0	0	0	0	0	0	0	0	0	0	0	0	0	0	0	0	0	0	0	0	0	0	0	0	0	1.23104	0	0	2.48323	EXOMESEQ: Li_26030808, RNASEQ: Yuon_chou_37507442_deg_cord
TRIM63	0	0	1.25219	0	0	0	0	0	0	0	0	0	0	0	0	0	0	0	0	0	0	0	0	1.23098	0	0	0	0	0	0	0	2.48316	EXOMESEQ: Li_26030808, RNASEQ: Oji_mmuo_33177681_mRNA
TACSTD2	0	0	1.25219	0	0	0	0	0	0	0	0	0	0	0	0	0	0	0	0	0	0	0	0	0	0	0	0	0	1.23086	0	0	2.48305	EXOMESEQ: Li_26030808, RNASEQ: Yuon_chou_37507442_deg_cord
PEX10	0	0	1.25219	0	0	0	0	0	0	0	0	0	0	0	0	0	0	0	0	0	0	0	0	0	0	0	0	0	1.23062	0	0	2.4828	EXOMESEQ: Li_26030808, RNASEQ: Yuon_chou_37507442_deg_cord
UAP1	0	0	1.25219	0	0	0	0	0	0	0	0	0	0	0	0	0	0	0	0	0	0	0	0	0	0	0	0	0	1.23047	0	0	2.48266	EXOMESEQ: Li_26030808, RNASEQ: Yuon_chou_37507442_deg_cord
GPT2	0	0	0	0	0	0	0	0	0	0	0	0	0	0	0	1.33501	0	0	0	0	0	0	0	0	0	0	1.14723	0	0	0	0	2.48223	MICROARRAY: Gong_32412065, RNASEQ: Yuon_chou_37507442_cpg_day14
RAB1A	0	0	1.25219	0	0	0	0	0	0	0	0	0	0	0	0	0	0	0	0	0	0	0	0	0	0	0	0	0	1.2299	0	0	2.48209	EXOMESEQ: Li_26030808, RNASEQ: Yuon_chou_37507442_deg_cord
TXNIP	0	0	1.25219	0	0	0	0	0	0	0	0	0	0	0	0	0	0	0	0	0	0	0	0	0	0	0	0	0	1.22986	0	0	2.48205	EXOMESEQ: Li_26030808, RNASEQ: Yuon_chou_37507442_deg_cord
RGS16	0	0	1.25219	0	0	0	0	0	0	0	0	0	0	0	0	0	0	0	0	0	0	0	0	0	0	0	0	0	1.2298	0	0	2.48199	EXOMESEQ: Li_26030808, RNASEQ: Yuon_chou_37507442_deg_cord
CFH	0	0	1.25219	0	0	0	0	0	0	0	0	0	0	0	0	0	0	0	0	0	0	0	0	0	0	0	0	0	1.2294	0	0	2.48158	EXOMESEQ: Li_26030808, RNASEQ: Yuon_chou_37507442_deg_cord
B3GALT6	0	0	1.25219	0	0	0	0	0	0	0	0	0	0	0	0	0	0	0	0	0	0	0	0	0	0	0	0	0	1.22915	0	0	2.48134	EXOMESEQ: Li_26030808, RNASEQ: Yuon_chou_37507442_deg_cord
LIPC	0	0	0	0	0	0	0	0	0	0	0	0	0	0	0	1.33512	0	0	0	0	0	0	0	0	0	0	0	1.14619	0	0	0	2.4813	MICROARRAY: Gong_32412065, RNASEQ: Yuon_chou_37507442_cpg_day28
BOLA1	0	0	1.25219	0	0	0	0	0	0	0	0	0	0	0	0	0	0	0	0	0	0	0	0	0	0	0	0	0	1.22895	0	0	2.48114	EXOMESEQ: Li_26030808, RNASEQ: Yuon_chou_37507442_deg_cord
LPIN1	0	0	1.25219	0	0	0	0	0	0	0	0	0	0	0	0	0	0	0	0	0	0	0	0	0	0	0	0	0	1.22875	0	0	2.48093	EXOMESEQ: Li_26030808, RNASEQ: Yuon_chou_37507442_deg_cord
RDH10	0	0	0	0	0	0	0	0	0	0	0	0	0	0	1.31071	0	0	0	0	0	0	0	0	0	0	0	1.17012	0	0	0	0	2.48083	MICROARRAY: Fulton_30459472, RNASEQ: Yuon_chou_37507442_cpg_day14
KCNH8	0	0	0	0	0	0	0	0	0	0	0	0	0	0	0	1.33474	0	0	0	0	0	0	0	0	0	0	0	1.14598	0	0	0	2.48072	MICROARRAY: Gong_32412065, RNASEQ: Yuon_chou_37507442_cpg_day28
ATP6V1C2	0	0	1.25219	0	0	0	0	0	0	0	0	0	0	0	0	0	0	0	0	0	0	0	0	0	0	0	0	0	1.22711	0	0	2.47929	EXOMESEQ: Li_26030808, RNASEQ: Yuon_chou_37507442_deg_cord
SYNC	0	0	1.25219	0	0	0	0	0	0	0	0	0	0	0	0	0	0	0	0	0	0	0	0	0	0	0	0	0	1.2266	0	0	2.47879	EXOMESEQ: Li_26030808, RNASEQ: Yuon_chou_37507442_deg_cord
LTBP4	0	0	0	0	0	0	0	0	0	0	0	0	0	0	1.31071	0	0	0	0	0	0	0	0	0	0	0	1.1679	1.1475	0	0	0	2.47861	MICROARRAY: Fulton_30459472, RNASEQ: Yuon_chou_37507442_cpg_day14
ST7-AS1	0	0	0	0	0	0	0	0	0	0	0	0	0	0	0	1.33411	0	0	0	0	0	0	0	0	0	0	0	1.14447	0	0	0	2.47857	MICROARRAY: Gong_32412065, RNASEQ: Yuon_chou_37507442_cpg_day28
SH3D21	0	0	1.25219	0	0	0	0	0	0	0	0	0	0	0	0	0	0	0	0	0	0	0	0	0	0	0	0	0	1.22634	0	0	2.47852	EXOMESEQ: Li_26030808, RNASEQ: Yuon_chou_37507442_deg_cord
SNCAIP	0	0	0	0	0	0	0	0	0	0	0	0	0	0	1.31071	0	0	0	0	0	0	0	0	0	0	0	1.16757	0	0	0	0	2.47828	MICROARRAY: Fulton_30459472, RNASEQ: Yuon_chou_37507442_cpg_day14
SRSF4	0	0	1.25219	0	0	0	0	0	0	0	0	0	0	0	0	0	0	0	0	0	0	0	0	0	0	0	1.16383	0	1.22599	0	0	2.47818	EXOMESEQ: Li_26030808, RNASEQ: Yuon_chou_37507442_deg_cord
PIK3R3	0	0	1.25219	0	0	0	0	0	0	0	0	0	0	0	0	0	0	0	0	0	0	0	0	0	0	0	0	0	1.22543	0	0	2.47761	EXOMESEQ: Li_26030808, RNASEQ: Yuon_chou_37507442_deg_cord
TTC24	0	0	1.25219	0	0	0	0	0	0	0	0	0	0	0	0	0	0	0	0	0	0	0	0	0	0	0	0	1.14407	1.22518	0	0	2.47737	EXOMESEQ: Li_26030808, RNASEQ: Yuon_chou_37507442_deg_cord
LPCAT1	0	0	0	0	0	0	0	0	0	0	0	0	0	0	1.31071	0	0	0	0	0	0	0	0	0	0	0	1.16638	0	0	0	0	2.47709	MICROARRAY: Fulton_30459472, RNASEQ: Yuon_chou_37507442_cpg_day14
ID3	0	0	1.25219	0	0	0	0	0	0	0	0	0	0	0	0	0	0	0	0	0	0	0	0	0	0	0	0	0	1.22468	0	0	2.47686	EXOMESEQ: Li_26030808, RNASEQ: Yuon_chou_37507442_deg_cord
DSP	0	0	0	0	0	0	0	0	0	0	0	0	0	0	0	1.33221	0	0	0	0	0	0	0	0	0	0	0	1.14452	0	0	0	2.47673	MICROARRAY: Gong_32412065, RNASEQ: Yuon_chou_37507442_cpg_day28
PRUNE1	0	0	1.25219	0	0	0	0	0	0	0	0	0	0	0	0	0	0	0	0	0	0	0	0	0	0	0	0	0	1.22447	0	0	2.47666	EXOMESEQ: Li_26030808, RNASEQ: Yuon_chou_37507442_deg_cord
POMGNT1	0	0	1.25219	0	0	0	0	0	0	0	0	0	0	0	0	0	0	0	0	0	0	0	0	0	0	0	0	0	1.22433	0	0	2.47652	EXOMESEQ: Li_26030808, RNASEQ: Yuon_chou_37507442_deg_cord
JMJD4	0	0	1.25219	0	0	0	0	0	0	0	0	0	0	0	0	0	0	0	0	0	0	0	0	0	0	0	0	0	1.22429	0	0	2.47648	EXOMESEQ: Li_26030808, RNASEQ: Yuon_chou_37507442_deg_cord
HNRNPLL	0	0	1.25219	0	0	0	0	0	0	0	0	0	0	0	0	0	0	0	0	0	0	0	0	0	0	0	0	0	1.22425	0	0	2.47644	EXOMESEQ: Li_26030808, RNASEQ: Yuon_chou_37507442_deg_cord
GEN1	0	0	1.25219	0	0	0	0	0	0	0	0	0	0	0	0	0	0	0	0	0	0	0	0	0	0	0	0	0	1.22423	0	0	2.47642	EXOMESEQ: Li_26030808, RNASEQ: Yuon_chou_37507442_deg_cord
BIRC6	0	0	1.25219	0	0	0	0	0	0	0	0	0	0	0	0	0	0	0	0	0	0	0	0	0	0	0	0	1.1445	1.22411	0	0	2.4763	EXOMESEQ: Li_26030808, RNASEQ: Yuon_chou_37507442_deg_cord
PLEKHA5	0	0	0	0	0	0	0	0	0	0	0	0	0	0	1.31071	0	0	0	0	0	0	0	0	0	0	0	1.16541	0	0	0	0	2.47612	MICROARRAY: Fulton_30459472, RNASEQ: Yuon_chou_37507442_cpg_day14
SELP	0	0	1.25219	0	0	0	0	0	0	0	0	0	0	0	0	0	0	0	0	0	0	0	0	0	0	0	0	0	1.22393	0	0	2.47611	EXOMESEQ: Li_26030808, RNASEQ: Yuon_chou_37507442_deg_cord
TMEM177	0	0	1.25219	0	0	0	0	0	0	0	0	0	0	0	0	0	0	0	0	0	0	0	0	0	0	0	0	0	1.22366	0	0	2.47585	EXOMESEQ: Li_26030808, RNASEQ: Yuon_chou_37507442_deg_cord
PAFAH2	0	0	1.25219	0	0	0	0	0	0	0	0	0	0	0	0	0	0	0	0	0	0	0	0	0	0	0	0	0	1.22281	0	0	2.475	EXOMESEQ: Li_26030808, RNASEQ: Yuon_chou_37507442_deg_cord
EPAS1	0	0	1.25219	0	0	0	0	0	0	0	0	0	0	0	0	0	0	0	0	0	0	0	0	0	0	0	0	0	1.22273	0	0	2.47492	EXOMESEQ: Li_26030808, RNASEQ: Yuon_chou_37507442_deg_cord
RETSAT	0	0	1.25219	0	0	0	0	0	0	0	0	0	0	0	0	0	0	0	0	0	0	0	0	0	0	0	0	0	1.22269	0	0	2.47488	EXOMESEQ: Li_26030808, RNASEQ: Yuon_chou_37507442_deg_cord
MR1	0	0	1.25219	0	0	0	0	0	0	0	0	0	0	0	0	0	0	0	0	0	0	0	0	0	0	0	0	0	1.22265	0	0	2.47484	EXOMESEQ: Li_26030808, RNASEQ: Yuon_chou_37507442_deg_cord
PNPT1	0	0	1.25219	0	0	0	0	0	0	0	0	0	0	0	0	0	0	0	0	0	0	0	0	0	0	0	0	0	1.22176	0	0	2.47395	EXOMESEQ: Li_26030808, RNASEQ: Yuon_chou_37507442_deg_cord
PLEKHN1	0	0	1.25219	0	0	0	0	0	0	0	0	0	0	0	0	0	0	0	0	0	0	0	0	0	0	0	0	0	1.22156	0	0	2.47375	EXOMESEQ: Li_26030808, RNASEQ: Yuon_chou_37507442_deg_cord
VPS45	0	0	1.25219	0	0	0	0	0	0	0	0	0	0	0	0	0	0	0	0	0	0	0	0	0	0	0	0	1.1436	1.2213	0	0	2.47348	EXOMESEQ: Li_26030808, RNASEQ: Yuon_chou_37507442_deg_cord
SEMA4D	0	0	0	0	0	0	0	0	0	0	0	0	0	0	1.31071	0	0	0	0	0	0	0	0	0	0	0	1.16245	0	0	0	0	2.47317	MICROARRAY: Fulton_30459472, RNASEQ: Yuon_chou_37507442_cpg_day14
RNASEL	0	0	1.25219	0	0	0	0	0	0	0	0	0	0	0	0	0	0	0	0	0	0	0	0	0	0	0	0	0	1.22091	0	0	2.4731	EXOMESEQ: Li_26030808, RNASEQ: Yuon_chou_37507442_deg_cord
WDR54	0	0	1.25219	0	0	0	0	0	0	0	0	0	0	0	0	0	0	0	0	0	0	0	0	0	0	0	0	0	1.22075	0	0	2.47294	EXOMESEQ: Li_26030808, RNASEQ: Yuon_chou_37507442_deg_cord
TNFRSF14	0	0	1.25219	0	0	0	0	0	0	0	0	0	0	0	0	0	0	0	0	0	0	0	0	0	0	0	0	0	1.22065	0	0	2.47284	EXOMESEQ: Li_26030808, RNASEQ: Yuon_chou_37507442_deg_cord
SPAG17	0	0	1.25219	0	0	0	0	0	0	0	0	0	0	0	0	0	0	0	0	0	0	0	0	0	0	0	0	0	1.22063	0	0	2.47281	EXOMESEQ: Li_26030808, RNASEQ: Yuon_chou_37507442_deg_cord
DUSP23	0	0	1.25219	0	0	0	0	0	0	0	0	0	0	0	0	0	0	0	0	0	0	0	0	0	0	0	0	0	1.22028	0	0	2.47247	EXOMESEQ: Li_26030808, RNASEQ: Yuon_chou_37507442_deg_cord
PKN2	0	0	1.25219	0	0	0	0	0	0	0	0	0	0	0	0	0	0	0	0	0	0	0	0	0	0	0	0	0	1.21992	0	0	2.47211	EXOMESEQ: Li_26030808, RNASEQ: Yuon_chou_37507442_deg_cord
CCND1	0	0	0	0	0	0	0	0	0	0	0	0	0	0	1.31071	0	0	0	0	0	0	0	0	0	0	0	1.16138	0	0	0	0	2.47209	MICROARRAY: Fulton_30459472, RNASEQ: Yuon_chou_37507442_cpg_day14
SACS	1.22988	0	0	0	0	0	0	0	0	0	0	0	0	0	0	0	0	0	0	0	0	0	0	0	0	0	0	0	1.242	0	0	2.47188	EXOMESEQ: Dai_34276789_data, RNASEQ: Yuon_chou_37507442_deg_cord
MARCHF1	0	0	1.25219	0	0	0	0	0	0	0	0	0	0	0	0	0	0	0	0	0	0	0	0	0	0	0	0	1.14716	1.21935	0	0	2.47154	EXOMESEQ: Li_26030808, RNASEQ: Yuon_chou_37507442_deg_cord
SH3GLB1	0	0	1.25219	0	0	0	0	0	0	0	0	0	0	0	0	0	0	0	0	0	0	0	0	0	0	0	0	0	1.21883	0	0	2.47101	EXOMESEQ: Li_26030808, RNASEQ: Yuon_chou_37507442_deg_cord
OLFML2A	0	0	0	0	0	0	0	0	0	0	0	0	0	0	1.31071	0	0	0	0	0	0	0	0	0	0	0	1.16027	0	0	0	0	2.47098	MICROARRAY: Fulton_30459472, RNASEQ: Yuon_chou_37507442_cpg_day14
EFCAB14	0	0	1.25219	0	0	0	0	0	0	0	0	0	0	0	0	0	0	0	0	0	0	0	0	0	0	0	0	0	1.21879	0	0	2.47097	EXOMESEQ: Li_26030808, RNASEQ: Yuon_chou_37507442_deg_cord
LGALS8	0	0	1.25219	0	0	0	0	0	0	0	0	0	0	0	0	0	0	0	0	0	0	0	0	0	0	0	0	0	1.2185	0	0	2.47069	EXOMESEQ: Li_26030808, RNASEQ: Yuon_chou_37507442_deg_cord
ELAPOR1	0	0	1.25219	0	0	0	0	0	0	0	0	0	0	0	0	0	0	0	0	0	0	0	0	0	0	0	0	0	1.21818	0	0	2.47037	EXOMESEQ: Li_26030808, RNASEQ: Yuon_chou_37507442_deg_cord
PANK4	0	0	1.25219	0	0	0	0	0	0	0	0	0	0	0	0	0	0	0	0	0	0	0	0	0	0	0	0	0	1.21806	0	0	2.47024	EXOMESEQ: Li_26030808, RNASEQ: Yuon_chou_37507442_deg_cord
CNN3	0	0	1.25219	0	0	0	0	0	0	0	0	0	0	0	0	0	0	0	0	0	0	0	0	0	0	0	0	0	1.21796	0	0	2.47014	EXOMESEQ: Li_26030808, RNASEQ: Yuon_chou_37507442_deg_cord
ELMOD3	0	0	1.25219	0	0	0	0	0	0	0	0	0	0	0	0	0	0	0	0	0	0	0	0	0	0	0	0	0	1.21743	0	0	2.46962	EXOMESEQ: Li_26030808, RNASEQ: Yuon_chou_37507442_deg_cord
ACADM	0	0	1.25219	0	0	0	0	0	0	0	0	0	0	0	0	0	0	0	0	0	0	0	0	0	0	0	0	0	1.21741	0	0	2.4696	EXOMESEQ: Li_26030808, RNASEQ: Yuon_chou_37507442_deg_cord
SH2D1B	0	0	1.25219	0	0	0	0	0	0	0	0	0	0	0	0	0	0	0	0	0	0	0	0	0	0	0	0	0	1.21717	0	0	2.46935	EXOMESEQ: Li_26030808, RNASEQ: Yuon_chou_37507442_deg_cord
PDE5A	0	0	0	0	0	0	0	0	0	0	0	0	0	0	1.31071	0	0	0	0	0	0	0	0	0	0	0	0	1.15817	0	0	0	2.46888	MICROARRAY: Fulton_30459472, RNASEQ: Yuon_chou_37507442_cpg_day28
VPS13D	0	0	1.25219	0	0	0	0	0	0	0	0	0	0	0	0	0	0	0	0	0	0	0	0	0	0	0	0	1.14584	1.21652	0	0	2.46871	EXOMESEQ: Li_26030808, RNASEQ: Yuon_chou_37507442_deg_cord
GPATCH11	0	0	1.25219	0	0	0	0	0	0	0	0	0	0	0	0	0	0	0	0	0	0	0	0	0	0	0	0	0	1.21644	0	0	2.46863	EXOMESEQ: Li_26030808, RNASEQ: Yuon_chou_37507442_deg_cord
PLD1	0	0	0	0	0	0	0	0	0	0	0	0	0	0	1.31071	0	0	0	0	0	0	0	0	0	0	0	1.15766	1.14658	0	0	0	2.46837	MICROARRAY: Fulton_30459472, RNASEQ: Yuon_chou_37507442_cpg_day14
B4GALT2	0	0	1.25219	0	0	0	0	0	0	0	0	0	0	0	0	0	0	0	0	0	0	0	0	0	0	0	0	0	1.21613	0	0	2.46832	EXOMESEQ: Li_26030808, RNASEQ: Yuon_chou_37507442_deg_cord
ZZZ3	0	0	1.25219	0	0	0	0	0	0	0	0	0	0	0	0	0	0	0	0	0	0	0	0	0	0	0	1.16317	0	1.21593	0	0	2.46812	EXOMESEQ: Li_26030808, RNASEQ: Yuon_chou_37507442_deg_cord
TSGA10	0	0	1.25219	0	0	0	0	0	0	0	0	0	0	0	0	0	0	0	0	0	0	0	0	0	0	0	0	0	1.2153	0	0	2.46749	EXOMESEQ: Li_26030808, RNASEQ: Yuon_chou_37507442_deg_cord
MAP4K3	0	0	0	0	0	0	0	0	0	0	0	0	0	0	0	0	0	0	0	0	0	1.29875	0	0	0	0	1.16872	0	0	0	0	2.46747	MICROARRAY: Windhorst_37090732, RNASEQ: Yuon_chou_37507442_cpg_day14
COMMD1	0	0	1.25219	0	0	0	0	0	0	0	0	0	0	0	0	0	0	0	0	0	0	0	0	0	0	0	0	0	1.21478	0	0	2.46697	EXOMESEQ: Li_26030808, RNASEQ: Yuon_chou_37507442_deg_cord
RCC1	0	0	1.25219	0	0	0	0	0	0	0	0	0	0	0	0	0	0	0	0	0	0	0	0	0	0	0	0	1.14517	1.21456	0	0	2.46674	EXOMESEQ: Li_26030808, RNASEQ: Yuon_chou_37507442_deg_cord
ACVR1B	0	0	0	0	0	0	0	0	0	0	0	0	0	0	0	0	0	0	0	0	0	1.29875	0	0	0	0	1.16609	0	0	0	0	2.46485	MICROARRAY: Windhorst_37090732, RNASEQ: Yuon_chou_37507442_cpg_day14
RAB33B	0	0	0	0	0	0	0	0	0	0	0	0	0	0	0	0	0	0	0	0	0	1.29875	0	0	0	0	0	1.16565	0	0	0	2.46441	MICROARRAY: Windhorst_37090732, RNASEQ: Yuon_chou_37507442_cpg_day28
PLEC	0	0	0	0	0	0	0	0	0	1.29872	0	0	0	0	0	0	0	0	0	0	0	0	0	0	0	0	1.16508	0	0	0	0	2.4638	MASS_SPEC: Ahmed_37839510, RNASEQ: Yuon_chou_37507442_cpg_day14
HIVEP2	0	0	0	0	0	0	0	0	0	0	0	0	0	0	0	0	0	0	0	0	0	1.29875	0	0	0	0	1.16452	0	0	0	0	2.46328	MICROARRAY: Windhorst_37090732, RNASEQ: Yuon_chou_37507442_cpg_day14
FBLN1	0	0	0	0	0	0	0	0	0	0	0	0	0	0	1.31071	0	0	0	0	0	0	0	0	0	0	0	1.15221	0	0	0	0	2.46292	MICROARRAY: Fulton_30459472, RNASEQ: Yuon_chou_37507442_cpg_day14
EPHB6	0	0	0	0	0	0	0	0	0	0	0	0	0	0	1.31071	0	0	0	0	0	0	0	0	0	0	0	1.15171	0	0	0	0	2.46242	MICROARRAY: Fulton_30459472, RNASEQ: Yuon_chou_37507442_cpg_day14
WDR45B	0	0	0	0	0	1.29626	0	0	0	0	0	0	0	0	0	0	0	0	0	0	0	0	0	0	0	0	1.16596	0	0	0	0	2.46222	RNASEQ: Yuon_chou_37507442_cpg_day14, GWAS: Ambalavanan_25449221
TFAP2C	0	0	0	0	0	0	0	0	0	0	0	0	0	0	1.31071	0	0	0	0	0	0	0	0	0	0	0	0	1.14972	0	0	0	2.46043	MICROARRAY: Fulton_30459472, RNASEQ: Yuon_chou_37507442_cpg_day28
GDF10	0	0	0	0	0	0	0	0	0	0	0	0	0	0	1.31071	0	0	0	0	0	0	0	0	0	0	0	1.14918	0	0	0	0	2.45989	MICROARRAY: Fulton_30459472, RNASEQ: Yuon_chou_37507442_cpg_day14
RECK	0	0	0	0	0	0	0	0	0	0	0	0	0	0	1.31071	0	0	0	0	0	0	0	0	0	0	0	0	1.14783	0	0	0	2.45854	MICROARRAY: Fulton_30459472, RNASEQ: Yuon_chou_37507442_cpg_day28
FRRS1	0	0	1.25219	0	0	0	0	0	0	0	0	0	0	0	0	0	0	0	1.20585	0	0	0	0	0	0	0	0	0	0	0	0	2.45804	MICROARRAY: Pietrzyk_24194948_up_day28, EXOMESEQ: Li_26030808
HMOX1	0	0	0	0	0	0	0	0	0	0	0	0	0	0	0	0	0	0	0	0	0	1.29875	0	0	0	0	1.15922	0	0	0	0	2.45798	MICROARRAY: Windhorst_37090732, RNASEQ: Yuon_chou_37507442_cpg_day14
PLXNC1	0	0	0	0	0	0	0	0	0	0	0	0	0	0	1.31071	0	0	0	0	0	0	0	0	0	0	0	1.14699	0	0	0	0	2.4577	MICROARRAY: Fulton_30459472, RNASEQ: Yuon_chou_37507442_cpg_day14
PRKRA	0	1.22591	0	0	0	0	0	0	0	0	0	0	0	0	0	0	0	0	0	0	0	0	0	0	0	0	0	0	1.23127	0	0	2.45718	EXOMESEQ: Hamvas_30342483, RNASEQ: Yuon_chou_37507442_deg_cord
MYLIP	0	0	0	0	0	0	0	0	0	0	0	0	0	0	1.31071	0	0	0	0	0	0	0	0	0	0	0	0	1.14455	0	0	0	2.45526	MICROARRAY: Fulton_30459472, RNASEQ: Yuon_chou_37507442_cpg_day28
PRF1	1.22988	0	0	0	0	0	0	0	0	0	0	0	0	0	0	0	0	0	0	0	0	0	0	0	0	0	0	0	1.22453	0	0	2.45442	EXOMESEQ: Dai_34276789_data, RNASEQ: Yuon_chou_37507442_deg_cord
CDC42BPB	0	1.22591	0	0	0	0	0	0	0	0	0	0	0	0	0	0	0	0	0	0	0	0	0	0	0	0	0	0	1.22688	0	0	2.45279	EXOMESEQ: Hamvas_30342483, RNASEQ: Yuon_chou_37507442_deg_cord
PI16	0	0	0	0	0	0	0	0	0	0	0	0	0	0	0	0	0	0	0	0	0	1.29875	0	0	0	0	1.1524	0	0	0	0	2.45116	MICROARRAY: Windhorst_37090732, RNASEQ: Yuon_chou_37507442_cpg_day14
P2RY6	0	0	0	0	0	0	0	0	0	0	0	0	0	0	0	0	0	0	0	0	0	1.29875	0	0	0	0	0	1.15173	0	0	0	2.45048	MICROARRAY: Windhorst_37090732, RNASEQ: Yuon_chou_37507442_cpg_day28
YWHAE	0	0	0	0	0	0	0	0	0	0	0	0	0	0	0	0	0	0	0	0	0	1.29875	0	0	0	0	0	1.14659	0	0	0	2.44534	MICROARRAY: Windhorst_37090732, RNASEQ: Yuon_chou_37507442_cpg_day28
MICA	0	0	0	0	0	0	0	0	0	0	0	0	0	0	0	0	0	0	0	0	0	1.29875	0	0	0	0	0	1.14424	0	0	0	2.44299	MICROARRAY: Windhorst_37090732, RNASEQ: Yuon_chou_37507442_cpg_day28
RNF130	0	0	0	0	0	0	0	0	1.21558	0	0	0	0	0	0	0	0	0	0	0	0	0	0	0	0	0	1.1608	0	1.22178	0	0	2.43736	RNASEQ: Yuon_chou_37507442_deg_cord, GWAS: Wang_23897914
KAZN	0	0	1.25219	0	0	0	0	0	0	0	0	0	0	0	0	0	0	0	0	0	0	0	0	0	0	0	1.17206	0	0	0	0	2.42425	EXOMESEQ: Li_26030808, RNASEQ: Yuon_chou_37507442_cpg_day14
ADPRS	0	0	1.25219	0	0	0	0	0	0	0	0	0	0	0	0	0	0	0	0	0	0	0	0	0	0	0	1.17194	0	0	0	0	2.42412	EXOMESEQ: Li_26030808, RNASEQ: Yuon_chou_37507442_cpg_day14
MAEL	0	0	1.25219	0	0	0	0	0	0	0	0	0	0	0	0	0	0	0	0	0	0	0	0	0	0	0	1.1719	0	0	0	0	2.42409	EXOMESEQ: Li_26030808, RNASEQ: Yuon_chou_37507442_cpg_day14
GPD2	0	0	1.25219	0	0	0	0	0	0	0	0	0	0	0	0	0	0	0	0	0	0	0	0	0	0	0	1.17189	0	0	0	0	2.42407	EXOMESEQ: Li_26030808, RNASEQ: Yuon_chou_37507442_cpg_day14
GALNT14	0	0	1.25219	0	0	0	0	0	0	0	0	0	0	0	0	0	0	0	0	0	0	0	0	0	0	0	1.17172	0	0	0	0	2.42391	EXOMESEQ: Li_26030808, RNASEQ: Yuon_chou_37507442_cpg_day14
GNAT2	0	0	1.25219	0	0	0	0	0	0	0	0	0	0	0	0	0	0	0	0	0	0	0	0	0	0	0	1.17132	0	0	0	0	2.42351	EXOMESEQ: Li_26030808, RNASEQ: Yuon_chou_37507442_cpg_day14
ARHGAP25	0	0	1.25219	0	0	0	0	0	0	0	0	0	0	0	0	0	0	0	0	0	0	0	0	0	0	0	1.17112	0	0	0	0	2.4233	EXOMESEQ: Li_26030808, RNASEQ: Yuon_chou_37507442_cpg_day14
ASPRV1	0	0	1.25219	0	0	0	0	0	0	0	0	0	0	0	0	0	0	0	0	0	0	0	0	0	0	0	1.17095	0	0	0	0	2.42314	EXOMESEQ: Li_26030808, RNASEQ: Yuon_chou_37507442_cpg_day14
NCOA1	0	0	1.25219	0	0	0	0	0	0	0	0	0	0	0	0	0	0	0	0	0	0	0	0	0	0	0	1.17094	0	0	0	0	2.42313	EXOMESEQ: Li_26030808, RNASEQ: Yuon_chou_37507442_cpg_day14
LRRC47	0	0	1.25219	0	0	0	0	0	0	0	0	0	0	0	0	0	0	0	0	0	0	0	0	0	0	0	1.17088	1.1551	0	0	0	2.42306	EXOMESEQ: Li_26030808, RNASEQ: Yuon_chou_37507442_cpg_day14
BTBD8	0	0	1.25219	0	0	0	0	0	0	0	0	0	0	0	0	0	0	0	0	0	0	0	0	0	0	0	1.17071	0	0	0	0	2.4229	EXOMESEQ: Li_26030808, RNASEQ: Yuon_chou_37507442_cpg_day14
CD55	0	0	1.25219	0	0	0	0	0	0	0	0	0	0	0	0	0	0	0	0	0	0	0	0	0	0	0	1.17065	0	0	0	0	2.42284	EXOMESEQ: Li_26030808, RNASEQ: Yuon_chou_37507442_cpg_day14
CEP85	0	0	1.25219	0	0	0	0	0	0	0	0	0	0	0	0	0	0	0	0	0	0	0	0	0	0	0	1.17026	0	0	0	0	2.42244	EXOMESEQ: Li_26030808, RNASEQ: Yuon_chou_37507442_cpg_day14
PLEKHG5	0	0	1.25219	0	0	0	0	0	0	0	0	0	0	0	0	0	0	0	0	0	0	0	0	0	0	0	1.17016	0	0	0	0	2.42234	EXOMESEQ: Li_26030808, RNASEQ: Yuon_chou_37507442_cpg_day14
TNFRSF18	0	0	1.25219	0	0	0	0	0	0	0	0	0	0	0	0	0	0	0	0	0	0	0	0	0	0	0	1.17008	0	0	0	0	2.42227	EXOMESEQ: Li_26030808, RNASEQ: Yuon_chou_37507442_cpg_day14
DENND2C	0	0	1.25219	0	0	0	0	0	0	0	0	0	0	0	0	0	0	0	0	0	0	0	0	0	0	0	1.16992	0	0	0	0	2.4221	EXOMESEQ: Li_26030808, RNASEQ: Yuon_chou_37507442_cpg_day14
TP73	0	0	1.25219	0	0	0	0	0	0	0	0	0	0	0	0	0	0	0	0	0	0	0	0	0	0	0	1.16974	1.14606	0	0	0	2.42193	EXOMESEQ: Li_26030808, RNASEQ: Yuon_chou_37507442_cpg_day14
FHAD1	0	0	1.25219	0	0	0	0	0	0	0	0	0	0	0	0	0	0	0	0	0	0	0	0	0	0	0	1.16888	0	0	0	0	2.42107	EXOMESEQ: Li_26030808, RNASEQ: Yuon_chou_37507442_cpg_day14
MTF2	0	0	1.25219	0	0	0	0	0	0	0	0	0	0	0	0	0	0	0	0	0	0	0	0	0	0	0	1.16886	0	0	0	0	2.42104	EXOMESEQ: Li_26030808, RNASEQ: Yuon_chou_37507442_cpg_day14
MAP3K2	0	0	1.25219	0	0	0	0	0	0	0	0	0	0	0	0	0	0	0	0	0	0	0	0	0	0	0	1.16839	0	0	0	0	2.42058	EXOMESEQ: Li_26030808, RNASEQ: Yuon_chou_37507442_cpg_day14
SPDYA	0	0	1.25219	0	0	0	0	0	0	0	0	0	0	0	0	0	0	0	0	0	0	0	0	0	0	0	1.16766	0	0	0	0	2.41984	EXOMESEQ: Li_26030808, RNASEQ: Yuon_chou_37507442_cpg_day14
NADK	0	0	1.25219	0	0	0	0	0	0	0	0	0	0	0	0	0	0	0	0	0	0	0	0	0	0	0	1.16761	1.14481	0	0	0	2.41979	EXOMESEQ: Li_26030808, RNASEQ: Yuon_chou_37507442_cpg_day14
RASAL2	0	0	1.25219	0	0	0	0	0	0	0	0	0	0	0	0	0	0	0	0	0	0	0	0	0	0	0	1.16752	1.14556	0	0	0	2.4197	EXOMESEQ: Li_26030808, RNASEQ: Yuon_chou_37507442_cpg_day14
NIBAN1	0	0	1.25219	0	0	0	0	0	0	0	0	0	0	0	0	0	0	0	0	0	0	0	0	0	0	0	1.16739	0	0	0	0	2.41958	EXOMESEQ: Li_26030808, RNASEQ: Yuon_chou_37507442_cpg_day14
PRDM2	0	0	1.25219	0	0	0	0	0	0	0	0	0	0	0	0	0	0	0	0	0	0	0	0	0	0	0	1.16721	0	0	0	0	2.4194	EXOMESEQ: Li_26030808, RNASEQ: Yuon_chou_37507442_cpg_day14
DNM3	0	0	1.25219	0	0	0	0	0	0	0	0	0	0	0	0	0	0	0	0	0	0	0	0	0	0	0	1.16708	0	0	0	0	2.41926	EXOMESEQ: Li_26030808, RNASEQ: Yuon_chou_37507442_cpg_day14
SLC35F3	0	0	1.25219	0	0	0	0	0	0	0	0	0	0	0	0	0	0	0	0	0	0	0	0	0	0	0	1.1666	0	0	0	0	2.41878	EXOMESEQ: Li_26030808, RNASEQ: Yuon_chou_37507442_cpg_day14
KIFAP3	0	0	1.25219	0	0	0	0	0	0	0	0	0	0	0	0	0	0	0	0	0	0	0	0	0	0	0	1.16627	0	0	0	0	2.41845	EXOMESEQ: Li_26030808, RNASEQ: Yuon_chou_37507442_cpg_day14
ELAVL4	0	0	1.25219	0	0	0	0	0	0	0	0	0	0	0	0	0	0	0	0	0	0	0	0	0	0	0	1.16617	0	0	0	0	2.41835	EXOMESEQ: Li_26030808, RNASEQ: Yuon_chou_37507442_cpg_day14
EDARADD	0	0	1.25219	0	0	0	0	0	0	0	0	0	0	0	0	0	0	0	0	0	0	0	0	0	0	0	1.16566	0	0	0	0	2.41785	EXOMESEQ: Li_26030808, RNASEQ: Yuon_chou_37507442_cpg_day14
RABGAP1L	0	0	1.25219	0	0	0	0	0	0	0	0	0	0	0	0	0	0	0	0	0	0	0	0	0	0	0	1.16561	0	0	0	0	2.4178	EXOMESEQ: Li_26030808, RNASEQ: Yuon_chou_37507442_cpg_day14
HSPG2	0	0	1.25219	0	0	0	0	0	0	0	0	0	0	0	0	0	0	0	0	0	0	0	0	0	0	0	1.16547	0	0	0	0	2.41766	EXOMESEQ: Li_26030808, RNASEQ: Yuon_chou_37507442_cpg_day14
BAZ2B	0	0	1.25219	0	0	0	0	0	0	0	0	0	0	0	0	0	0	0	0	0	0	0	0	0	0	0	1.16526	0	0	0	0	2.41744	EXOMESEQ: Li_26030808, RNASEQ: Yuon_chou_37507442_cpg_day14
TMEM185B	0	0	1.25219	0	0	0	0	0	0	0	0	0	0	0	0	0	0	0	0	0	0	0	0	0	0	0	1.16517	0	0	0	0	2.41736	EXOMESEQ: Li_26030808, RNASEQ: Yuon_chou_37507442_cpg_day14
THEM5	0	0	1.25219	0	0	0	0	0	0	0	0	0	0	0	0	0	0	0	0	0	0	0	0	0	0	0	1.16516	1.14495	0	0	0	2.41734	EXOMESEQ: Li_26030808, RNASEQ: Yuon_chou_37507442_cpg_day14
PTPN7	0	0	1.25219	0	0	0	0	0	0	0	0	0	0	0	0	0	0	0	0	0	0	0	0	0	0	0	1.16511	0	0	0	0	2.41729	EXOMESEQ: Li_26030808, RNASEQ: Yuon_chou_37507442_cpg_day14
GYPC	0	0	1.25219	0	0	0	0	0	0	0	0	0	0	0	0	0	0	0	0	0	0	0	0	0	0	0	1.1649	0	0	0	0	2.41709	EXOMESEQ: Li_26030808, RNASEQ: Yuon_chou_37507442_cpg_day14
FER1L5	0	0	1.25219	0	0	0	0	0	0	0	0	0	0	0	0	0	0	0	0	0	0	0	0	0	0	0	1.16469	0	0	0	0	2.41688	EXOMESEQ: Li_26030808, RNASEQ: Yuon_chou_37507442_cpg_day14
DCTN1	0	0	1.25219	0	0	0	0	0	0	0	0	0	0	0	0	0	0	0	0	0	0	0	0	0	0	0	1.16454	0	0	0	0	2.41672	EXOMESEQ: Li_26030808, RNASEQ: Yuon_chou_37507442_cpg_day14
GUCA2B	0	0	1.25219	0	0	0	0	0	0	0	0	0	0	0	0	0	0	0	0	0	0	0	0	0	0	0	1.16447	0	0	0	0	2.41666	EXOMESEQ: Li_26030808, RNASEQ: Yuon_chou_37507442_cpg_day14
EHD3	0	0	1.25219	0	0	0	0	0	0	0	0	0	0	0	0	0	0	0	0	0	0	0	0	0	0	0	1.16444	0	0	0	0	2.41662	EXOMESEQ: Li_26030808, RNASEQ: Yuon_chou_37507442_cpg_day14
SFXN5	0	0	1.25219	0	0	0	0	0	0	0	0	0	0	0	0	0	0	0	0	0	0	0	0	0	0	0	1.16437	0	0	0	0	2.41656	EXOMESEQ: Li_26030808, RNASEQ: Yuon_chou_37507442_cpg_day14
ACOXL	0	0	1.25219	0	0	0	0	0	0	0	0	0	0	0	0	0	0	0	0	0	0	0	0	0	0	0	1.16406	0	0	0	0	2.41624	EXOMESEQ: Li_26030808, RNASEQ: Yuon_chou_37507442_cpg_day14
MOV10	0	0	1.25219	0	0	0	0	0	0	0	0	0	0	0	0	0	0	0	0	0	0	0	0	0	0	0	1.16315	0	0	0	0	2.41534	EXOMESEQ: Li_26030808, RNASEQ: Yuon_chou_37507442_cpg_day14
ETV3L	0	0	1.25219	0	0	0	0	0	0	0	0	0	0	0	0	0	0	0	0	0	0	0	0	0	0	0	1.163	0	0	0	0	2.41518	EXOMESEQ: Li_26030808, RNASEQ: Yuon_chou_37507442_cpg_day14
CASQ2	0	0	1.25219	0	0	0	0	0	0	0	0	0	0	0	0	0	0	0	0	0	0	0	0	0	0	0	1.16287	0	0	0	0	2.41506	EXOMESEQ: Li_26030808, RNASEQ: Yuon_chou_37507442_cpg_day14
SLC2A1	0	0	1.25219	0	0	0	0	0	0	0	0	0	0	0	0	0	0	0	0	0	0	0	0	0	0	0	1.16276	0	0	0	0	2.41494	EXOMESEQ: Li_26030808, RNASEQ: Yuon_chou_37507442_cpg_day14
KISS1	0	0	1.25219	0	0	0	0	0	0	0	0	0	0	0	0	0	0	0	0	0	0	0	0	0	0	0	1.16264	0	0	0	0	2.41483	EXOMESEQ: Li_26030808, RNASEQ: Yuon_chou_37507442_cpg_day14
CYB561D1	0	0	1.25219	0	0	0	0	0	0	0	0	0	0	0	0	0	0	0	0	0	0	0	0	0	0	0	1.16253	0	0	0	0	2.41472	EXOMESEQ: Li_26030808, RNASEQ: Yuon_chou_37507442_cpg_day14
GALE	0	0	1.25219	0	0	0	0	0	0	0	0	0	0	0	0	0	0	0	0	0	0	0	0	0	0	0	1.16205	0	0	0	0	2.41424	EXOMESEQ: Li_26030808, RNASEQ: Yuon_chou_37507442_cpg_day14
ATP6V1G3	0	0	1.25219	0	0	0	0	0	0	0	0	0	0	0	0	0	0	0	0	0	0	0	0	0	0	0	1.16142	0	0	0	0	2.41361	EXOMESEQ: Li_26030808, RNASEQ: Yuon_chou_37507442_cpg_day14
PRXL2B	0	0	1.25219	0	0	0	0	0	0	0	0	0	0	0	0	0	0	0	0	0	0	0	0	0	0	0	1.16112	0	0	0	0	2.4133	EXOMESEQ: Li_26030808, RNASEQ: Yuon_chou_37507442_cpg_day14
ADI1	0	0	1.25219	0	0	0	0	0	0	0	0	0	0	0	0	0	0	0	0	0	0	0	0	0	0	0	1.16071	0	0	0	0	2.4129	EXOMESEQ: Li_26030808, RNASEQ: Yuon_chou_37507442_cpg_day14
TOR3A	0	0	1.25219	0	0	0	0	0	0	0	0	0	0	0	0	0	0	0	0	0	0	0	0	0	0	0	1.16036	0	0	0	0	2.41254	EXOMESEQ: Li_26030808, RNASEQ: Yuon_chou_37507442_cpg_day14
QPCT	0	0	1.25219	0	0	0	0	0	0	0	0	0	0	0	0	0	0	0	0	0	0	0	0	0	0	0	1.16014	0	0	0	0	2.41233	EXOMESEQ: Li_26030808, RNASEQ: Yuon_chou_37507442_cpg_day14
IWS1	0	0	1.25219	0	0	0	0	0	0	0	0	0	0	0	0	0	0	0	0	0	0	0	0	0	0	0	1.16004	0	0	0	0	2.41223	EXOMESEQ: Li_26030808, RNASEQ: Yuon_chou_37507442_cpg_day14
OR10K2	0	0	1.25219	0	0	0	0	0	0	0	0	0	0	0	0	0	0	0	0	0	0	0	0	0	0	0	1.15995	0	0	0	0	2.41214	EXOMESEQ: Li_26030808, RNASEQ: Yuon_chou_37507442_cpg_day14
PIFO	0	0	1.25219	0	0	0	0	0	0	0	0	0	0	0	0	0	0	0	0	0	0	0	0	0	0	0	1.1586	0	0	0	0	2.41079	EXOMESEQ: Li_26030808, RNASEQ: Yuon_chou_37507442_cpg_day14
STK40	0	0	1.25219	0	0	0	0	0	0	0	0	0	0	0	0	0	0	0	0	0	0	0	0	0	0	0	1.15855	1.14575	0	0	0	2.41074	EXOMESEQ: Li_26030808, RNASEQ: Yuon_chou_37507442_cpg_day14
DARS1	0	0	1.25219	0	0	0	0	0	0	0	0	0	0	0	0	0	0	0	0	0	0	0	0	0	0	0	1.15822	0	0	0	0	2.41041	EXOMESEQ: Li_26030808, RNASEQ: Yuon_chou_37507442_cpg_day14
RABIF	0	0	1.25219	0	0	0	0	0	0	0	0	0	0	0	0	0	0	0	0	0	0	0	0	0	0	0	1.1582	0	0	0	0	2.41039	EXOMESEQ: Li_26030808, RNASEQ: Yuon_chou_37507442_cpg_day14
AHDC1	0	0	1.25219	0	0	0	0	0	0	0	0	0	0	0	0	0	0	0	0	0	0	0	0	0	0	0	1.15815	0	0	0	0	2.41034	EXOMESEQ: Li_26030808, RNASEQ: Yuon_chou_37507442_cpg_day14
ZMPSTE24	0	0	1.25219	0	0	0	0	0	0	0	0	0	0	0	0	0	0	0	0	0	0	0	0	0	0	0	1.15795	0	0	0	0	2.41013	EXOMESEQ: Li_26030808, RNASEQ: Yuon_chou_37507442_cpg_day14
CNTN2	0	0	1.25219	0	0	0	0	0	0	0	0	0	0	0	0	0	0	0	0	0	0	0	0	0	0	0	1.15793	0	0	0	0	2.41012	EXOMESEQ: Li_26030808, RNASEQ: Yuon_chou_37507442_cpg_day14
NFASC	0	0	1.25219	0	0	0	0	0	0	0	0	0	0	0	0	0	0	0	0	0	0	0	0	0	0	0	1.1579	0	0	0	0	2.41008	EXOMESEQ: Li_26030808, RNASEQ: Yuon_chou_37507442_cpg_day14
NLRC4	0	0	1.25219	0	0	0	0	0	0	0	0	0	0	0	0	0	0	0	0	0	0	0	0	0	0	0	1.15781	0	0	0	0	2.40999	EXOMESEQ: Li_26030808, RNASEQ: Yuon_chou_37507442_cpg_day14
CIB4	0	0	1.25219	0	0	0	0	0	0	0	0	0	0	0	0	0	0	0	0	0	0	0	0	0	0	0	1.15753	0	0	0	0	2.40972	EXOMESEQ: Li_26030808, RNASEQ: Yuon_chou_37507442_cpg_day14
DYSF	0	0	1.25219	0	0	0	0	0	0	0	0	0	0	0	0	0	0	0	0	0	0	0	0	0	0	0	1.15696	0	0	0	0	2.40915	EXOMESEQ: Li_26030808, RNASEQ: Yuon_chou_37507442_cpg_day14
KCNAB2	0	0	1.25219	0	0	0	0	0	0	0	0	0	0	0	0	0	0	0	0	0	0	0	0	0	0	0	1.15691	0	0	0	0	2.4091	EXOMESEQ: Li_26030808, RNASEQ: Yuon_chou_37507442_cpg_day14
ANXA4	0	0	1.25219	0	0	0	0	0	0	0	0	0	0	0	0	0	0	0	0	0	0	0	0	0	0	0	1.15681	0	0	0	0	2.409	EXOMESEQ: Li_26030808, RNASEQ: Yuon_chou_37507442_cpg_day14
TTC34	0	0	1.25219	0	0	0	0	0	0	0	0	0	0	0	0	0	0	0	0	0	0	0	0	0	0	0	1.15675	1.14674	0	0	0	2.40893	EXOMESEQ: Li_26030808, RNASEQ: Yuon_chou_37507442_cpg_day14
TRABD2B	0	0	1.25219	0	0	0	0	0	0	0	0	0	0	0	0	0	0	0	0	0	0	0	0	0	0	0	1.15663	0	0	0	0	2.40882	EXOMESEQ: Li_26030808, RNASEQ: Yuon_chou_37507442_cpg_day14
LRIG2	0	0	1.25219	0	0	0	0	0	0	0	0	0	0	0	0	0	0	0	0	0	0	0	0	0	0	0	1.15649	0	0	0	0	2.40868	EXOMESEQ: Li_26030808, RNASEQ: Yuon_chou_37507442_cpg_day14
SLC25A24	0	0	1.25219	0	0	0	0	0	0	0	0	0	0	0	0	0	0	0	0	0	0	0	0	0	0	0	1.15612	0	0	0	0	2.4083	EXOMESEQ: Li_26030808, RNASEQ: Yuon_chou_37507442_cpg_day14
GLI2	0	0	1.25219	0	0	0	0	0	0	0	0	0	0	0	0	0	0	0	0	0	0	0	0	0	0	0	1.15599	0	0	0	0	2.40818	EXOMESEQ: Li_26030808, RNASEQ: Yuon_chou_37507442_cpg_day14
MSH6	0	0	1.25219	0	0	0	0	0	0	0	0	0	0	0	0	0	0	0	0	0	0	0	0	0	0	0	1.15582	0	0	0	0	2.40801	EXOMESEQ: Li_26030808, RNASEQ: Yuon_chou_37507442_cpg_day14
PGBD2	0	0	1.25219	0	0	0	0	0	0	0	0	0	0	0	0	0	0	0	0	0	0	0	0	0	0	0	1.15566	0	0	0	0	2.40785	EXOMESEQ: Li_26030808, RNASEQ: Yuon_chou_37507442_cpg_day14
RRNAD1	0	0	1.25219	0	0	0	0	0	0	0	0	0	0	0	0	0	0	0	0	0	0	0	0	0	0	0	1.15564	0	0	0	0	2.40782	EXOMESEQ: Li_26030808, RNASEQ: Yuon_chou_37507442_cpg_day14
DISP3	0	0	1.25219	0	0	0	0	0	0	0	0	0	0	0	0	0	0	0	0	0	0	0	0	0	0	0	1.15562	1.14603	0	0	0	2.40781	EXOMESEQ: Li_26030808, RNASEQ: Yuon_chou_37507442_cpg_day14
SYF2	0	0	1.25219	0	0	0	0	0	0	0	0	0	0	0	0	0	0	0	0	0	0	0	0	0	0	0	1.15529	0	0	0	0	2.40748	EXOMESEQ: Li_26030808, RNASEQ: Yuon_chou_37507442_cpg_day14
NEB	0	0	1.25219	0	0	0	0	0	0	0	0	0	0	0	0	0	0	0	0	0	0	0	0	0	0	0	1.15522	0	0	0	0	2.40741	EXOMESEQ: Li_26030808, RNASEQ: Yuon_chou_37507442_cpg_day14
IGSF21	0	0	1.25219	0	0	0	0	0	0	0	0	0	0	0	0	0	0	0	0	0	0	0	0	0	0	0	1.15498	0	0	0	0	2.40717	EXOMESEQ: Li_26030808, RNASEQ: Yuon_chou_37507442_cpg_day14
SH3BGRL3	0	0	1.25219	0	0	0	0	0	0	0	0	0	0	0	0	0	0	0	0	0	0	0	0	0	0	0	1.15487	0	0	0	0	2.40705	EXOMESEQ: Li_26030808, RNASEQ: Yuon_chou_37507442_cpg_day14
CTRC	0	0	1.25219	0	0	0	0	0	0	0	0	0	0	0	0	0	0	0	0	0	0	0	0	0	0	0	1.15479	0	0	0	0	2.40698	EXOMESEQ: Li_26030808, RNASEQ: Yuon_chou_37507442_cpg_day14
PSD4	0	0	1.25219	0	0	0	0	0	0	0	0	0	0	0	0	0	0	0	0	0	0	0	0	0	0	0	0	1.1547	0	0	0	2.40688	EXOMESEQ: Li_26030808, RNASEQ: Yuon_chou_37507442_cpg_day28
GPN1	0	0	1.25219	0	0	0	0	0	0	0	0	0	0	0	0	0	0	0	0	0	0	0	0	0	0	0	1.1542	0	0	0	0	2.40638	EXOMESEQ: Li_26030808, RNASEQ: Yuon_chou_37507442_cpg_day14
RTN4	0	0	1.25219	0	0	0	0	0	0	0	0	0	0	0	0	0	0	0	0	0	0	0	0	0	0	0	1.15387	0	0	0	0	2.40605	EXOMESEQ: Li_26030808, RNASEQ: Yuon_chou_37507442_cpg_day14
ZMYND12	0	0	1.25219	0	0	0	0	0	0	0	0	0	0	0	0	0	0	0	0	0	0	0	0	0	0	0	0	1.15372	0	0	0	2.40591	EXOMESEQ: Li_26030808, RNASEQ: Yuon_chou_37507442_cpg_day28
SZT2	0	0	1.25219	0	0	0	0	0	0	0	0	0	0	0	0	0	0	0	0	0	0	0	0	0	0	0	1.1537	0	0	0	0	2.40589	EXOMESEQ: Li_26030808, RNASEQ: Yuon_chou_37507442_cpg_day14
ASB17	0	0	1.25219	0	0	0	0	0	0	0	0	0	0	0	0	0	0	0	0	0	0	0	0	0	0	0	1.15346	0	0	0	0	2.40565	EXOMESEQ: Li_26030808, RNASEQ: Yuon_chou_37507442_cpg_day14
ARHGEF4	0	0	1.25219	0	0	0	0	0	0	0	0	0	0	0	0	0	0	0	0	0	0	0	0	0	0	0	1.15324	0	0	0	0	2.40542	EXOMESEQ: Li_26030808, RNASEQ: Yuon_chou_37507442_cpg_day14
CYP2J2	0	0	1.25219	0	0	0	0	0	0	0	0	0	0	0	0	0	0	0	0	0	0	0	0	0	0	0	0	1.15278	0	0	0	2.40497	EXOMESEQ: Li_26030808, RNASEQ: Yuon_chou_37507442_cpg_day28
EDN2	0	0	1.25219	0	0	0	0	0	0	0	0	0	0	0	0	0	0	0	0	0	0	0	0	0	0	0	1.15267	0	0	0	0	2.40485	EXOMESEQ: Li_26030808, RNASEQ: Yuon_chou_37507442_cpg_day14
LAMTOR5	0	0	1.25219	0	0	0	0	0	0	0	0	0	0	0	0	0	0	0	0	0	0	0	0	0	0	0	1.15192	0	0	0	0	2.40411	EXOMESEQ: Li_26030808, RNASEQ: Yuon_chou_37507442_cpg_day14
DDR2	0	0	1.25219	0	0	0	0	0	0	0	0	0	0	0	0	0	0	0	0	0	0	0	0	0	0	0	1.15151	0	0	0	0	2.40369	EXOMESEQ: Li_26030808, RNASEQ: Yuon_chou_37507442_cpg_day14
H6PD	0	0	1.25219	0	0	0	0	0	0	0	0	0	0	0	0	0	0	0	0	0	0	0	0	0	0	0	1.15137	0	0	0	0	2.40355	EXOMESEQ: Li_26030808, RNASEQ: Yuon_chou_37507442_cpg_day14
TRIT1	0	0	1.25219	0	0	0	0	0	0	0	0	0	0	0	0	0	0	0	0	0	0	0	0	0	0	0	1.15124	0	0	0	0	2.40343	EXOMESEQ: Li_26030808, RNASEQ: Yuon_chou_37507442_cpg_day14
MTF1	0	0	1.25219	0	0	0	0	0	0	0	0	0	0	0	0	0	0	0	0	0	0	0	0	0	0	0	1.1512	0	0	0	0	2.40339	EXOMESEQ: Li_26030808, RNASEQ: Yuon_chou_37507442_cpg_day14
SLC2A5	0	0	1.25219	0	0	0	0	0	0	0	0	0	0	0	0	0	0	0	0	0	0	0	0	0	0	0	0	1.15093	0	0	0	2.40312	EXOMESEQ: Li_26030808, RNASEQ: Yuon_chou_37507442_cpg_day28
RERE	0	0	1.25219	0	0	0	0	0	0	0	0	0	0	0	0	0	0	0	0	0	0	0	0	0	0	0	0	1.15056	0	0	0	2.40274	EXOMESEQ: Li_26030808, RNASEQ: Yuon_chou_37507442_cpg_day28
CR1	0	0	1.25219	0	0	0	0	0	0	0	0	0	0	0	0	0	0	0	0	0	0	0	0	0	0	0	1.15052	0	0	0	0	2.40271	EXOMESEQ: Li_26030808, RNASEQ: Yuon_chou_37507442_cpg_day14
PHLDA3	0	0	1.25219	0	0	0	0	0	0	0	0	0	0	0	0	0	0	0	0	0	0	0	0	0	0	0	1.15033	0	0	0	0	2.40252	EXOMESEQ: Li_26030808, RNASEQ: Yuon_chou_37507442_cpg_day14
LRBA	1.22988	0	0	0	0	0	0	0	0	0	0	0	0	0	0	0	0	0	0	0	0	0	0	0	0	0	1.17211	0	0	0	0	2.402	EXOMESEQ: Dai_34276789_data, RNASEQ: Yuon_chou_37507442_cpg_day14
LEPR	0	0	1.25219	0	0	0	0	0	0	0	0	0	0	0	0	0	0	0	0	0	0	0	0	0	0	0	1.14969	0	0	0	0	2.40187	EXOMESEQ: Li_26030808, RNASEQ: Yuon_chou_37507442_cpg_day14
OR2L3	0	0	1.25219	0	0	0	0	0	0	0	0	0	0	0	0	0	0	0	0	0	0	0	0	0	0	0	1.14965	0	0	0	0	2.40184	EXOMESEQ: Li_26030808, RNASEQ: Yuon_chou_37507442_cpg_day14
ZNF839	0	0	0	0	0	0	0	0	0	0	0	0	0	0	0	0	0	0	0	0	0	1.29875	1.10302	0	0	0	0	0	0	0	0	2.40178	MICROARRAY: Windhorst_37090732, RNASEQ: Bhattacharya_33552042
TIGAR	0	0	0	0	0	0	0	0	0	0	0	0	0	0	0	0	0	0	0	0	0	1.29875	1.10302	0	0	0	0	0	0	0	0	2.40178	MICROARRAY: Windhorst_37090732, RNASEQ: Bhattacharya_33552042
PIP5K1A	0	0	1.25219	0	0	0	0	0	0	0	0	0	0	0	0	0	0	0	0	0	0	0	0	0	0	0	0	1.14938	0	0	0	2.40157	EXOMESEQ: Li_26030808, RNASEQ: Yuon_chou_37507442_cpg_day28
SMYD3	0	0	1.25219	0	0	0	0	0	0	0	0	0	0	0	0	0	0	0	0	0	0	0	0	0	0	0	1.14935	1.14416	0	0	0	2.40153	EXOMESEQ: Li_26030808, RNASEQ: Yuon_chou_37507442_cpg_day14
IGSF3	0	0	1.25219	0	0	0	0	0	0	0	0	0	0	0	0	0	0	0	0	0	0	0	0	0	0	0	1.14926	0	0	0	0	2.40145	EXOMESEQ: Li_26030808, RNASEQ: Yuon_chou_37507442_cpg_day14
CAMTA1	0	0	1.25219	0	0	0	0	0	0	0	0	0	0	0	0	0	0	0	0	0	0	0	0	0	0	0	1.14908	1.14552	0	0	0	2.40127	EXOMESEQ: Li_26030808, RNASEQ: Yuon_chou_37507442_cpg_day14
ZBTB17	0	0	1.25219	0	0	0	0	0	0	0	0	0	0	0	0	0	0	0	0	0	0	0	0	0	0	0	0	1.14848	0	0	0	2.40067	EXOMESEQ: Li_26030808, RNASEQ: Yuon_chou_37507442_cpg_day28
TERT	1.22988	0	0	0	0	0	0	0	0	0	0	0	0	0	0	0	0	0	0	0	0	0	0	0	0	0	1.17074	0	0	0	0	2.40062	EXOMESEQ: Dai_34276789_data, RNASEQ: Yuon_chou_37507442_cpg_day14
PLEKHA6	0	0	1.25219	0	0	0	0	0	0	0	0	0	0	0	0	0	0	0	0	0	0	0	0	0	0	0	1.1483	0	0	0	0	2.40049	EXOMESEQ: Li_26030808, RNASEQ: Yuon_chou_37507442_cpg_day14
ZNF513	0	0	1.25219	0	0	0	0	0	0	0	0	0	0	0	0	0	0	0	0	0	0	0	0	0	0	0	1.14824	0	0	0	0	2.40042	EXOMESEQ: Li_26030808, RNASEQ: Yuon_chou_37507442_cpg_day14
PPP1R12B	0	0	1.25219	0	0	0	0	0	0	0	0	0	0	0	0	0	0	0	0	0	0	0	0	0	0	0	1.14788	0	0	0	0	2.40007	EXOMESEQ: Li_26030808, RNASEQ: Yuon_chou_37507442_cpg_day14
CLIP4	0	0	1.25219	0	0	0	0	0	0	0	0	0	0	0	0	0	0	0	0	0	0	0	0	0	0	0	0	1.14776	0	0	0	2.39994	EXOMESEQ: Li_26030808, RNASEQ: Yuon_chou_37507442_cpg_day28
HTR1D	0	0	1.25219	0	0	0	0	0	0	0	0	0	0	0	0	0	0	0	0	0	0	0	0	0	0	0	0	1.14769	0	0	0	2.39987	EXOMESEQ: Li_26030808, RNASEQ: Yuon_chou_37507442_cpg_day28
SNRNP200	0	0	1.25219	0	0	0	0	0	0	0	0	0	0	0	0	0	0	0	0	0	0	0	0	0	0	0	0	1.14766	0	0	0	2.39985	EXOMESEQ: Li_26030808, RNASEQ: Yuon_chou_37507442_cpg_day28
CGREF1	0	0	1.25219	0	0	0	0	0	0	0	0	0	0	0	0	0	0	0	0	0	0	0	0	0	0	0	0	1.14732	0	0	0	2.39951	EXOMESEQ: Li_26030808, RNASEQ: Yuon_chou_37507442_cpg_day28
SHC1	0	0	1.25219	0	0	0	0	0	0	0	0	0	0	0	0	0	0	0	0	0	0	0	0	0	0	0	1.14719	0	0	0	0	2.39937	EXOMESEQ: Li_26030808, RNASEQ: Yuon_chou_37507442_cpg_day14
HP1BP3	0	0	1.25219	0	0	0	0	0	0	0	0	0	0	0	0	0	0	0	0	0	0	0	0	0	0	0	1.14702	0	0	0	0	2.39921	EXOMESEQ: Li_26030808, RNASEQ: Yuon_chou_37507442_cpg_day14
SYPL2	0	0	1.25219	0	0	0	0	0	0	0	0	0	0	0	0	0	0	0	0	0	0	0	0	0	0	0	0	1.14686	0	0	0	2.39905	EXOMESEQ: Li_26030808, RNASEQ: Yuon_chou_37507442_cpg_day28
SMG5	0	0	1.25219	0	0	0	0	0	0	0	0	0	0	0	0	0	0	0	0	0	0	0	0	0	0	0	0	1.14672	0	0	0	2.39891	EXOMESEQ: Li_26030808, RNASEQ: Yuon_chou_37507442_cpg_day28
PLPPR4	0	0	1.25219	0	0	0	0	0	0	0	0	0	0	0	0	0	0	0	0	0	0	0	0	0	0	0	0	1.14668	0	0	0	2.39886	EXOMESEQ: Li_26030808, RNASEQ: Yuon_chou_37507442_cpg_day28
PRDM16	0	0	1.25219	0	0	0	0	0	0	0	0	0	0	0	0	0	0	0	0	0	0	0	0	0	0	0	0	1.14652	0	0	0	2.39871	EXOMESEQ: Li_26030808, RNASEQ: Yuon_chou_37507442_cpg_day28
HCN3	0	0	1.25219	0	0	0	0	0	0	0	0	0	0	0	0	0	0	0	0	0	0	0	0	0	0	0	0	1.14648	0	0	0	2.39866	EXOMESEQ: Li_26030808, RNASEQ: Yuon_chou_37507442_cpg_day28
HECTD3	0	0	1.25219	0	0	0	0	0	0	0	0	0	0	0	0	0	0	0	0	0	0	0	0	0	0	0	0	1.14645	0	0	0	2.39864	EXOMESEQ: Li_26030808, RNASEQ: Yuon_chou_37507442_cpg_day28
COQ8A	0	0	1.25219	0	0	0	0	0	0	0	0	0	0	0	0	0	0	0	0	0	0	0	0	0	0	0	0	1.14641	0	0	0	2.3986	EXOMESEQ: Li_26030808, RNASEQ: Yuon_chou_37507442_cpg_day28
OLFML2B	0	0	1.25219	0	0	0	0	0	0	0	0	0	0	0	0	0	0	0	0	0	0	0	0	0	0	0	0	1.1464	0	0	0	2.39859	EXOMESEQ: Li_26030808, RNASEQ: Yuon_chou_37507442_cpg_day28
BARHL2	0	0	1.25219	0	0	0	0	0	0	0	0	0	0	0	0	0	0	0	0	0	0	0	0	0	0	0	0	1.14637	0	0	0	2.39855	EXOMESEQ: Li_26030808, RNASEQ: Yuon_chou_37507442_cpg_day28
ALK	0	0	1.25219	0	0	0	0	0	0	0	0	0	0	0	0	0	0	0	0	0	0	0	0	0	0	0	0	1.14632	0	0	0	2.3985	EXOMESEQ: Li_26030808, RNASEQ: Yuon_chou_37507442_cpg_day28
CD1B	0	0	1.25219	0	0	0	0	0	0	0	0	0	0	0	0	0	0	0	0	0	0	0	0	0	0	0	0	1.14628	0	0	0	2.39846	EXOMESEQ: Li_26030808, RNASEQ: Yuon_chou_37507442_cpg_day28
ZNF687	0	0	1.25219	0	0	0	0	0	0	0	0	0	0	0	0	0	0	0	0	0	0	0	0	0	0	0	0	1.14627	0	0	0	2.39846	EXOMESEQ: Li_26030808, RNASEQ: Yuon_chou_37507442_cpg_day28
ACTRT2	0	0	1.25219	0	0	0	0	0	0	0	0	0	0	0	0	0	0	0	0	0	0	0	0	0	0	0	0	1.1461	0	0	0	2.39829	EXOMESEQ: Li_26030808, RNASEQ: Yuon_chou_37507442_cpg_day28
CNGA3	0	0	1.25219	0	0	0	0	0	0	0	0	0	0	0	0	0	0	0	0	0	0	0	0	0	0	0	0	1.14605	0	0	0	2.39824	EXOMESEQ: Li_26030808, RNASEQ: Yuon_chou_37507442_cpg_day28
CTTNBP2NL	0	0	1.25219	0	0	0	0	0	0	0	0	0	0	0	0	0	0	0	0	0	0	0	0	0	0	0	0	1.14602	0	0	0	2.39821	EXOMESEQ: Li_26030808, RNASEQ: Yuon_chou_37507442_cpg_day28
EFHC1	1.22988	0	0	0	0	0	0	0	0	0	0	0	0	0	0	0	0	0	0	0	0	0	0	0	0	0	1.16833	0	0	0	0	2.39821	EXOMESEQ: Dai_34276789_data, RNASEQ: Yuon_chou_37507442_cpg_day14
ITGA10	0	0	1.25219	0	0	0	0	0	0	0	0	0	0	0	0	0	0	0	0	0	0	0	0	0	0	0	0	1.14601	0	0	0	2.3982	EXOMESEQ: Li_26030808, RNASEQ: Yuon_chou_37507442_cpg_day28
CNKSR1	0	0	1.25219	0	0	0	0	0	0	0	0	0	0	0	0	0	0	0	0	0	0	0	0	0	0	0	0	1.14599	0	0	0	2.39818	EXOMESEQ: Li_26030808, RNASEQ: Yuon_chou_37507442_cpg_day28
LRRC42	0	0	1.25219	0	0	0	0	0	0	0	0	0	0	0	0	0	0	0	0	0	0	0	0	0	0	0	0	1.14583	0	0	0	2.39802	EXOMESEQ: Li_26030808, RNASEQ: Yuon_chou_37507442_cpg_day28
MYOG	0	0	1.25219	0	0	0	0	0	0	0	0	0	0	0	0	0	0	0	0	0	0	0	0	0	0	0	0	1.14578	0	0	0	2.39797	EXOMESEQ: Li_26030808, RNASEQ: Yuon_chou_37507442_cpg_day28
TMEM240	0	0	1.25219	0	0	0	0	0	0	0	0	0	0	0	0	0	0	0	0	0	0	0	0	0	0	0	0	1.14575	0	0	0	2.39794	EXOMESEQ: Li_26030808, RNASEQ: Yuon_chou_37507442_cpg_day28
EMX1	0	0	1.25219	0	0	0	0	0	0	0	0	0	0	0	0	0	0	0	0	0	0	0	0	0	0	0	0	1.14567	0	0	0	2.39785	EXOMESEQ: Li_26030808, RNASEQ: Yuon_chou_37507442_cpg_day28
DRC1	0	0	1.25219	0	0	0	0	0	0	0	0	0	0	0	0	0	0	0	0	0	0	0	0	0	0	0	0	1.14556	0	0	0	2.39774	EXOMESEQ: Li_26030808, RNASEQ: Yuon_chou_37507442_cpg_day28
LHX8	0	0	1.25219	0	0	0	0	0	0	0	0	0	0	0	0	0	0	0	0	0	0	0	0	0	0	0	0	1.14551	0	0	0	2.3977	EXOMESEQ: Li_26030808, RNASEQ: Yuon_chou_37507442_cpg_day28
TRAPPC12	0	0	1.25219	0	0	0	0	0	0	0	0	0	0	0	0	0	0	0	0	0	0	0	0	0	0	0	0	1.1455	0	0	0	2.39768	EXOMESEQ: Li_26030808, RNASEQ: Yuon_chou_37507442_cpg_day28
COLGALT2	0	0	1.25219	0	0	0	0	0	0	0	0	0	0	0	0	0	0	0	0	0	0	0	0	0	0	0	0	1.14548	0	0	0	2.39766	EXOMESEQ: Li_26030808, RNASEQ: Yuon_chou_37507442_cpg_day28
NUAK2	0	0	1.25219	0	0	0	0	0	0	0	0	0	0	0	0	0	0	0	0	0	0	0	0	0	0	0	0	1.14545	0	0	0	2.39764	EXOMESEQ: Li_26030808, RNASEQ: Yuon_chou_37507442_cpg_day28
MYBPHL	0	0	1.25219	0	0	0	0	0	0	0	0	0	0	0	0	0	0	0	0	0	0	0	0	0	0	0	0	1.14543	0	0	0	2.39761	EXOMESEQ: Li_26030808, RNASEQ: Yuon_chou_37507442_cpg_day28
CD160	0	0	1.25219	0	0	0	0	0	0	0	0	0	0	0	0	0	0	0	0	0	0	0	0	0	0	0	0	1.14535	0	0	0	2.39754	EXOMESEQ: Li_26030808, RNASEQ: Yuon_chou_37507442_cpg_day28
KIF1B	0	0	1.25219	0	0	0	0	0	0	0	0	0	0	0	0	0	0	0	0	0	0	0	0	0	0	0	0	1.14535	0	0	0	2.39753	EXOMESEQ: Li_26030808, RNASEQ: Yuon_chou_37507442_cpg_day28
MAST2	0	0	1.25219	0	0	0	0	0	0	0	0	0	0	0	0	0	0	0	0	0	0	0	0	0	0	0	0	1.14533	0	0	0	2.39751	EXOMESEQ: Li_26030808, RNASEQ: Yuon_chou_37507442_cpg_day28
PRKCZ	0	0	1.25219	0	0	0	0	0	0	0	0	0	0	0	0	0	0	0	0	0	0	0	0	0	0	0	0	1.14531	0	0	0	2.3975	EXOMESEQ: Li_26030808, RNASEQ: Yuon_chou_37507442_cpg_day28
ZNF512	0	0	1.25219	0	0	0	0	0	0	0	0	0	0	0	0	0	0	0	0	0	0	0	0	0	0	0	0	1.14531	0	0	0	2.39749	EXOMESEQ: Li_26030808, RNASEQ: Yuon_chou_37507442_cpg_day28
PRSS37	0	1.22591	0	0	0	0	0	0	0	0	0	0	0	0	0	0	0	0	0	0	0	0	0	0	0	0	1.17157	0	0	0	0	2.39748	EXOMESEQ: Hamvas_30342483, RNASEQ: Yuon_chou_37507442_cpg_day14
NBPF3	0	0	1.25219	0	0	0	0	0	0	0	0	0	0	0	0	0	0	0	0	0	0	0	0	0	0	0	0	1.1452	0	0	0	2.39738	EXOMESEQ: Li_26030808, RNASEQ: Yuon_chou_37507442_cpg_day28
VPS54	0	0	1.25219	0	0	0	0	0	0	0	0	0	0	0	0	0	0	0	0	0	0	0	0	0	0	0	0	1.14518	0	0	0	2.39736	EXOMESEQ: Li_26030808, RNASEQ: Yuon_chou_37507442_cpg_day28
PIGV	0	0	1.25219	0	0	0	0	0	0	0	0	0	0	0	0	0	0	0	0	0	0	0	0	0	0	0	0	1.14514	0	0	0	2.39733	EXOMESEQ: Li_26030808, RNASEQ: Yuon_chou_37507442_cpg_day28
TTC7A	0	0	1.25219	0	0	0	0	0	0	0	0	0	0	0	0	0	0	0	0	0	0	0	0	0	0	0	0	1.14512	0	0	0	2.39731	EXOMESEQ: Li_26030808, RNASEQ: Yuon_chou_37507442_cpg_day28
C1QTNF12	0	0	1.25219	0	0	0	0	0	0	0	0	0	0	0	0	0	0	0	0	0	0	0	0	0	0	0	0	1.14509	0	0	0	2.39728	EXOMESEQ: Li_26030808, RNASEQ: Yuon_chou_37507442_cpg_day28
FAM228A	0	0	1.25219	0	0	0	0	0	0	0	0	0	0	0	0	0	0	0	0	0	0	0	0	0	0	0	0	1.14508	0	0	0	2.39727	EXOMESEQ: Li_26030808, RNASEQ: Yuon_chou_37507442_cpg_day28
MAP1LC3C	0	0	1.25219	0	0	0	0	0	0	0	0	0	0	0	0	0	0	0	0	0	0	0	0	0	0	0	0	1.14497	0	0	0	2.39716	EXOMESEQ: Li_26030808, RNASEQ: Yuon_chou_37507442_cpg_day28
SEPTIN10	0	0	1.25219	0	0	0	0	0	0	0	0	0	0	0	0	0	0	0	0	0	0	0	0	0	0	0	0	1.14486	0	0	0	2.39705	EXOMESEQ: Li_26030808, RNASEQ: Yuon_chou_37507442_cpg_day28
RIIAD1	0	0	1.25219	0	0	0	0	0	0	0	0	0	0	0	0	0	0	0	0	0	0	0	0	0	0	0	0	1.14476	0	0	0	2.39694	EXOMESEQ: Li_26030808, RNASEQ: Yuon_chou_37507442_cpg_day28
ZNF644	0	0	1.25219	0	0	0	0	0	0	0	0	0	0	0	0	0	0	0	0	0	0	0	0	0	0	0	0	1.14469	0	0	0	2.39688	EXOMESEQ: Li_26030808, RNASEQ: Yuon_chou_37507442_cpg_day28
LONRF2	0	0	1.25219	0	0	0	0	0	0	0	0	0	0	0	0	0	0	0	0	0	0	0	0	0	0	0	0	1.14464	0	0	0	2.39682	EXOMESEQ: Li_26030808, RNASEQ: Yuon_chou_37507442_cpg_day28
DNASE2B	0	0	1.25219	0	0	0	0	0	0	0	0	0	0	0	0	0	0	0	0	0	0	0	0	0	0	0	0	1.14463	0	0	0	2.39682	EXOMESEQ: Li_26030808, RNASEQ: Yuon_chou_37507442_cpg_day28
ATP13A2	0	0	1.25219	0	0	0	0	0	0	0	0	0	0	0	0	0	0	0	0	0	0	0	0	0	0	0	0	1.14456	0	0	0	2.39674	EXOMESEQ: Li_26030808, RNASEQ: Yuon_chou_37507442_cpg_day28
PTF1A	1.22988	0	0	0	0	0	0	0	0	0	0	0	0	0	0	0	0	0	0	0	0	0	0	0	0	0	1.16684	0	0	0	0	2.39672	EXOMESEQ: Dai_34276789_data, RNASEQ: Yuon_chou_37507442_cpg_day14
SLC66A1	0	0	1.25219	0	0	0	0	0	0	0	0	0	0	0	0	0	0	0	0	0	0	0	0	0	0	0	0	1.14452	0	0	0	2.39671	EXOMESEQ: Li_26030808, RNASEQ: Yuon_chou_37507442_cpg_day28
CASZ1	0	0	1.25219	0	0	0	0	0	0	0	0	0	0	0	0	0	0	0	0	0	0	0	0	0	0	0	0	1.14448	0	0	0	2.39667	EXOMESEQ: Li_26030808, RNASEQ: Yuon_chou_37507442_cpg_day28
GBA	0	0	1.25219	0	0	0	0	0	0	0	0	0	0	0	0	0	0	0	0	0	0	0	0	0	0	0	0	1.14441	0	0	0	2.3966	EXOMESEQ: Li_26030808, RNASEQ: Yuon_chou_37507442_cpg_day28
ADGRB2	0	0	1.25219	0	0	0	0	0	0	0	0	0	0	0	0	0	0	0	0	0	0	0	0	0	0	0	0	1.1444	0	0	0	2.39659	EXOMESEQ: Li_26030808, RNASEQ: Yuon_chou_37507442_cpg_day28
RNF103	0	0	1.25219	0	0	0	0	0	0	0	0	0	0	0	0	0	0	0	0	0	0	0	1.10302	0	0	0	0	1.14437	0	0	0	2.39656	EXOMESEQ: Li_26030808, RNASEQ: Yuon_chou_37507442_cpg_day28
DVL1	0	0	1.25219	0	0	0	0	0	0	0	0	0	0	0	0	0	0	0	0	0	0	0	0	0	0	0	0	1.14435	0	0	0	2.39654	EXOMESEQ: Li_26030808, RNASEQ: Yuon_chou_37507442_cpg_day28
SLC45A1	0	0	1.25219	0	0	0	0	0	0	0	0	0	0	0	0	0	0	0	0	0	0	0	0	0	0	0	0	1.14419	0	0	0	2.39637	EXOMESEQ: Li_26030808, RNASEQ: Yuon_chou_37507442_cpg_day28
L1TD1	0	0	1.25219	0	0	0	0	0	0	0	0	0	0	0	0	0	0	0	0	0	0	0	0	0	0	0	0	1.14417	0	0	0	2.39636	EXOMESEQ: Li_26030808, RNASEQ: Yuon_chou_37507442_cpg_day28
KIDINS220	0	0	1.25219	0	0	0	0	0	0	0	0	0	0	0	0	0	0	0	0	0	0	0	0	0	0	0	0	1.14415	0	0	0	2.39634	EXOMESEQ: Li_26030808, RNASEQ: Yuon_chou_37507442_cpg_day28
BCAN	0	0	1.25219	0	0	0	0	0	0	0	0	0	0	0	0	0	0	0	0	0	0	0	0	0	0	0	0	1.14411	0	0	0	2.3963	EXOMESEQ: Li_26030808, RNASEQ: Yuon_chou_37507442_cpg_day28
CLEC4F	0	0	1.25219	0	0	0	0	0	0	0	0	0	0	0	0	0	0	0	0	0	0	0	0	0	0	0	0	1.1441	0	0	0	2.39629	EXOMESEQ: Li_26030808, RNASEQ: Yuon_chou_37507442_cpg_day28
PAQR7	0	0	1.25219	0	0	0	0	0	0	0	0	0	0	0	0	0	0	0	0	0	0	0	0	0	0	0	0	1.14395	0	0	0	2.39614	EXOMESEQ: Li_26030808, RNASEQ: Yuon_chou_37507442_cpg_day28
CACHD1	0	0	1.25219	0	0	0	0	0	0	0	0	0	0	0	0	0	0	0	0	0	0	0	0	0	0	0	0	1.14386	0	0	0	2.39604	EXOMESEQ: Li_26030808, RNASEQ: Yuon_chou_37507442_cpg_day28
NPL	0	0	1.25219	0	0	0	0	0	0	0	0	0	0	0	0	0	0	0	0	0	0	0	0	0	0	0	0	1.14384	0	0	0	2.39603	EXOMESEQ: Li_26030808, RNASEQ: Yuon_chou_37507442_cpg_day28
IL12RB2	0	0	1.25219	0	0	0	0	0	0	0	0	0	0	0	0	0	0	0	0	0	0	0	0	0	0	0	0	1.14373	0	0	0	2.39592	EXOMESEQ: Li_26030808, RNASEQ: Yuon_chou_37507442_cpg_day28
SHISA4	0	0	1.25219	0	0	0	0	0	0	0	0	0	0	0	0	0	0	0	0	0	0	0	0	0	0	0	0	1.14367	0	0	0	2.39585	EXOMESEQ: Li_26030808, RNASEQ: Yuon_chou_37507442_cpg_day28
PDIA6	0	0	1.25219	0	0	0	0	0	0	0	0	0	0	0	0	0	0	0	0	0	0	0	0	0	0	0	0	1.14366	0	0	0	2.39585	EXOMESEQ: Li_26030808, RNASEQ: Yuon_chou_37507442_cpg_day28
CHST10	0	0	1.25219	0	0	0	0	0	0	0	0	0	0	0	0	0	0	0	0	0	0	0	0	0	0	0	0	1.14365	0	0	0	2.39584	EXOMESEQ: Li_26030808, RNASEQ: Yuon_chou_37507442_cpg_day28
CFAP74	0	0	1.25219	0	0	0	0	0	0	0	0	0	0	0	0	0	0	0	0	0	0	0	0	0	0	0	0	1.14361	0	0	0	2.3958	EXOMESEQ: Li_26030808, RNASEQ: Yuon_chou_37507442_cpg_day28
DOCK6	1.22988	0	0	0	0	0	0	0	0	0	0	0	0	0	0	0	0	0	0	0	0	0	0	0	0	0	1.165	0	0	0	0	2.39489	EXOMESEQ: Dai_34276789_data, RNASEQ: Yuon_chou_37507442_cpg_day14
ARHGAP31	0	1.22591	0	0	0	0	0	0	0	0	0	0	0	0	0	0	0	0	0	0	0	0	0	0	0	0	1.16349	0	0	0	0	2.3894	EXOMESEQ: Hamvas_30342483, RNASEQ: Yuon_chou_37507442_cpg_day14
NDUFS7	1.22988	0	0	0	0	0	0	0	0	0	0	0	0	0	0	0	0	0	0	0	0	0	0	0	0	0	1.14941	0	0	0	0	2.37929	EXOMESEQ: Dai_34276789_data, RNASEQ: Yuon_chou_37507442_cpg_day14
DDHD1	1.22988	0	0	0	0	0	0	0	0	0	0	0	0	0	0	0	0	0	0	0	0	0	0	0	0	0	0	1.1482	0	0	0	2.37808	EXOMESEQ: Dai_34276789_data, RNASEQ: Yuon_chou_37507442_cpg_day28
FBXO15	0	0	0	0	0	0	0	0	1.21558	0	0	0	0	0	0	0	0	0	0	0	0	0	0	0	0	0	1.16211	0	0	0	0	2.37769	GWAS: Wang_23897914, RNASEQ: Yuon_chou_37507442_cpg_day14
MKKS	1.22988	0	0	0	0	0	0	0	0	0	0	0	0	0	0	0	0	0	0	0	0	0	0	0	0	0	0	1.14511	0	0	0	2.375	EXOMESEQ: Dai_34276789_data, RNASEQ: Yuon_chou_37507442_cpg_day28
SPG7	1.22988	0	0	0	0	0	0	0	0	0	0	0	0	0	0	0	0	0	0	0	0	0	0	0	0	0	0	1.14496	0	0	0	2.37485	EXOMESEQ: Dai_34276789_data, RNASEQ: Yuon_chou_37507442_cpg_day28
LMF1	1.22988	1.22591	0	0	0	0	0	0	0	0	0	0	0	0	0	0	0	0	0	0	0	0	0	0	0	0	0	1.14479	0	0	0	2.37467	EXOMESEQ: Dai_34276789_data, RNASEQ: Yuon_chou_37507442_cpg_day28
CFD	1.22988	0	0	0	0	0	0	0	0	0	0	0	0	0	0	0	0	0	0	0	0	0	0	0	0	0	0	1.14388	0	0	0	2.37377	EXOMESEQ: Dai_34276789_data, RNASEQ: Yuon_chou_37507442_cpg_day28
HPDL	0	0	1.25219	0	0	0	0	0	0	0	0	0	0	0	0	0	0	0	0	0	0	0	0	0	0	1.12134	0	0	0	0	0	2.37353	RNASEQ: Tsotakos_35947545_down, EXOMESEQ: Li_26030808
TRPS1	0	0	0	0	0	0	0	0	1.21558	0	0	0	0	0	0	0	0	0	0	0	0	0	0	0	0	0	1.15704	0	0	0	0	2.37262	GWAS: Wang_23897914, RNASEQ: Yuon_chou_37507442_cpg_day14
ATF7IP	0	1.22591	0	0	0	0	0	0	0	0	0	0	0	0	0	0	0	0	0	0	0	0	0	0	0	0	0	1.14518	0	0	0	2.37109	EXOMESEQ: Hamvas_30342483, RNASEQ: Yuon_chou_37507442_cpg_day28
ATP10B	0	1.22591	0	0	0	0	0	0	0	0	0	0	0	0	0	0	0	0	0	0	0	0	0	0	0	0	0	1.14366	0	0	0	2.36957	EXOMESEQ: Hamvas_30342483, RNASEQ: Yuon_chou_37507442_cpg_day28
TMEM163	0	0	0	0	0	0	0	0	0	0	0	0	0	0	0	0	0	0	1.20585	0	0	0	0	0	0	0	1.15662	0	0	0	0	2.36247	MICROARRAY: Pietrzyk_24194948_up_day28, RNASEQ: Yuon_chou_37507442_cpg_day14
CHST3	0	0	0	0	0	0	0	0	1.21558	0	0	0	0	0	0	0	0	0	0	0	0	0	0	0	0	0	0	1.14439	0	0	0	2.35996	GWAS: Wang_23897914, RNASEQ: Yuon_chou_37507442_cpg_day28
RLF	0	0	1.25219	0	0	0	0	0	0	0	0	0	0	0	0	0	0	0	0	0	0	0	1.10302	0	0	0	0	0	0	0	0	2.35521	EXOMESEQ: Li_26030808, RNASEQ: Bhattacharya_33552042
FOXJ3	0	0	1.25219	0	0	0	0	0	0	0	0	0	0	0	0	0	0	0	0	0	0	0	1.10302	0	0	0	0	0	0	0	0	2.35521	EXOMESEQ: Li_26030808, RNASEQ: Bhattacharya_33552042
GORAB	0	0	1.25219	0	0	0	0	0	0	0	0	0	0	0	0	0	0	0	0	0	0	0	1.10302	0	0	0	0	0	0	0	0	2.35521	EXOMESEQ: Li_26030808, RNASEQ: Bhattacharya_33552042
RGS1	0	0	1.25219	0	0	0	0	0	0	0	0	0	0	0	0	0	0	0	0	0	0	0	1.10302	0	0	0	0	0	0	0	0	2.35521	EXOMESEQ: Li_26030808, RNASEQ: Bhattacharya_33552042
MAPK11	0	0	0	0	1.12489	0	0	0	0	0	0	0	0	0	0	0	0	0	0	0	0	0	0	0	0	0	0	0	1.21603	0	0	2.34092	EXOMESEQ: Luo_36514862_SNPS, RNASEQ: Yuon_chou_37507442_deg_cord
RNU11	0	0	0	0	0	0	0	0	0	0	0	0	0	0	0	0	0	0	0	0	1.01584	0	0	0	0	0	0	1.1451	0	0	0	2.16094	MICROARRAY: Shen_33093882, RNASEQ: Yuon_chou_37507442_cpg_day28
LOC150568	0	0	0	0	0	0	0	1.80572	0	0	0	0	0	0	0	0	0	0	0	0	0	0	0	0	0	0	0	0	0	0	0	1.80572	GWAS: Torgerson_30113228
CD3G	0	0	0	0	0	0	0	0	0	0	0	0	0	0	0	0	1.72992	0	0	1.52958	0	0	0	0	0	0	0	0	0	0	0	1.72992	MICROARRAY: Pietrzyk_24194948_down_day28
CD6	0	0	0	0	0	0	0	0	0	0	0	0	0	0	0	0	1.71522	0	0	1.5297	0	0	0	0	0	0	0	0	0	0	0	1.71522	MICROARRAY: Pietrzyk_24194948_down_day28
TRAV8-3	0	0	0	0	0	0	0	0	0	0	0	0	0	0	0	0	1.70302	0	0	1.52955	0	0	0	0	0	0	0	0	0	0	0	1.70302	MICROARRAY: Pietrzyk_24194948_down_day28
STK32C	0	0	0	0	0	0	0	1.68748	0	0	0	0	0	0	0	0	0	0	0	0	0	0	0	0	0	0	0	0	0	0	0	1.68748	GWAS: Torgerson_30113228
CD3E	0	0	0	0	0	0	0	0	0	0	0	0	0	0	0	0	1.66664	1.50123	0	0	0	0	0	0	0	0	0	0	0	0	0	1.66664	MICROARRAY: Pietrzyk_24194948_down_day28
BTN3A3	0	0	0	0	0	0	0	0	0	0	0	0	0	0	0	0	1.66095	0	0	1.52972	0	0	0	0	0	0	0	0	0	0	0	1.66095	MICROARRAY: Pietrzyk_24194948_down_day28
MDGA2	0	0	0	0	0	0	0	1.65792	0	0	0	0	0	0	0	0	0	0	0	0	0	0	0	0	0	0	0	0	0	0	0	1.65792	GWAS: Torgerson_30113228
TBC1D31	0	0	0	0	0	0	0	0	0	0	0	0	0	0	0	0	1.65574	1.49841	0	0	0	0	0	0	0	0	0	0	0	0	0	1.65574	MICROARRAY: Pietrzyk_24194948_down_day28
NOG	0	0	0	0	0	0	0	0	0	0	0	0	0	0	0	0	1.64637	0	0	1.52976	0	0	0	0	0	0	0	0	0	0	0	1.64637	MICROARRAY: Pietrzyk_24194948_down_day28
KDSR	0	0	0	0	0	0	0	0	0	0	0	0	0	0	0	0	1.64419	0	0	0	0	0	0	0	0	0	0	0	0	0	0	1.64419	MICROARRAY: Pietrzyk_24194948_down_day28
TRAJ17	0	0	0	0	0	0	0	0	0	0	0	0	0	0	0	0	1.63792	0	0	0	0	0	0	0	0	0	0	0	0	0	0	1.63792	MICROARRAY: Pietrzyk_24194948_down_day28
GIMAP7	0	0	0	0	0	0	0	0	0	0	0	0	0	0	0	0	1.63391	0	0	0	0	0	0	0	0	0	0	0	0	0	0	1.63391	MICROARRAY: Pietrzyk_24194948_down_day28
SPON1	0	0	0	0	0	0	0	0	0	0	0	0	0	0	0	0	1.63001	0	0	1.52971	0	0	0	0	0	0	0	0	0	0	0	1.63001	MICROARRAY: Pietrzyk_24194948_down_day28
ABAT	0	0	0	0	0	0	0	1.62836	0	0	0	0	0	0	0	0	0	0	0	0	0	0	0	0	0	0	0	0	0	0	0	1.62836	GWAS: Torgerson_30113228
SLAIN1	0	0	0	0	0	0	0	0	0	0	0	0	0	0	0	0	1.6281	0	0	0	0	0	0	0	0	0	0	0	0	0	0	1.6281	MICROARRAY: Pietrzyk_24194948_down_day28
PCED1B	0	0	0	0	0	0	0	0	0	0	0	0	0	0	0	0	1.6262	0	0	1.52968	0	0	0	0	0	0	0	0	0	0	0	1.6262	MICROARRAY: Pietrzyk_24194948_down_day28
VSIG1	0	0	0	0	0	0	0	0	0	0	0	0	0	0	0	0	1.62059	0	0	1.52969	0	0	0	0	0	0	0	0	0	0	0	1.62059	MICROARRAY: Pietrzyk_24194948_down_day28
CD200R1	0	0	0	0	0	0	0	0	0	0	0	0	0	0	0	0	1.60964	0	0	0	0	0	0	0	0	0	0	0	0	0	0	1.60964	MICROARRAY: Pietrzyk_24194948_down_day28
DSC1	0	0	0	0	0	0	0	0	0	0	0	0	0	0	0	0	1.60784	0	0	0	0	0	0	0	0	0	0	0	0	0	0	1.60784	MICROARRAY: Pietrzyk_24194948_down_day28
NECAP2	0	0	0	0	0	0	0	0	0	0	0	0	0	0	0	0	0	1.60612	0	0	0	0	0	0	0	0	0	0	0	0	0	1.60612	MICROARRAY: Pietrzyk_24194948_down_day5
ZNF569	0	0	0	0	0	0	0	0	0	0	0	0	0	0	0	0	1.60604	0	0	0	0	0	0	0	0	0	0	0	0	0	0	1.60604	MICROARRAY: Pietrzyk_24194948_down_day28
HOXB2	0	0	0	0	0	0	0	0	0	0	0	0	0	0	0	0	1.60425	0	0	0	0	0	0	0	0	0	0	0	0	0	0	1.60425	MICROARRAY: Pietrzyk_24194948_down_day28
SNORA8	0	0	0	0	0	0	0	0	0	0	0	0	0	0	0	0	1.60246	0	0	0	0	0	0	0	0	0	0	0	0	0	0	1.60246	MICROARRAY: Pietrzyk_24194948_down_day28
ZNF658	0	0	0	0	0	0	0	0	0	0	0	0	0	0	0	0	1.60067	0	0	0	0	0	0	0	0	0	0	0	0	0	0	1.60067	MICROARRAY: Pietrzyk_24194948_down_day28
KLHL3	0	0	0	0	0	0	0	0	0	0	0	0	0	0	0	0	1.5971	0	0	0	0	0	0	0	0	0	0	0	0	0	0	1.5971	MICROARRAY: Pietrzyk_24194948_down_day28
GNPNAT1	0	0	0	0	0	0	0	0	0	0	0	0	0	0	0	0	1.58999	0	0	0	0	0	0	0	0	0	0	0	0	0	0	1.58999	MICROARRAY: Pietrzyk_24194948_down_day28
CLUAP1	0	0	0	0	0	0	0	0	0	0	0	0	0	0	0	0	1.58822	0	0	1.52962	0	0	0	0	0	0	0	0	0	0	0	1.58822	MICROARRAY: Pietrzyk_24194948_down_day28
LZTFL1	0	0	0	0	0	0	0	0	0	0	0	0	0	0	0	0	1.58645	0	0	0	0	0	0	0	0	0	0	0	0	0	0	1.58645	MICROARRAY: Pietrzyk_24194948_down_day28
SKAP1	0	0	0	0	0	0	0	0	0	0	0	0	0	0	0	0	1.58467	1.50005	0	0	0	0	0	0	0	0	0	0	0	0	0	1.58467	MICROARRAY: Pietrzyk_24194948_down_day28
TOMM70	0	0	0	0	0	0	0	0	0	0	0	0	0	0	0	0	1.5829	0	0	0	0	0	0	0	0	0	0	0	0	0	0	1.5829	MICROARRAY: Pietrzyk_24194948_down_day28
KCNK5	0	0	0	0	0	0	0	0	0	0	0	0	0	0	0	0	0	0	0	1.58255	0	0	0	0	0	0	0	0	0	0	0	1.58255	MICROARRAY: Pietrzyk_24194948_up_day5
TULP3	0	0	0	0	0	0	0	0	0	0	0	0	0	0	0	0	0	1.58153	0	0	0	1.29875	0	0	0	0	0	0	0	0	0	1.58153	MICROARRAY: Pietrzyk_24194948_down_day5
MLLT3	0	0	0	0	0	0	0	0	0	0	0	0	0	0	0	0	1.56876	0	0	0	0	0	0	0	0	0	0	0	0	0	0	1.56876	MICROARRAY: Pietrzyk_24194948_down_day28
MORC4	0	0	0	0	0	0	0	0	0	0	0	0	0	0	0	0	1.56699	0	0	1.52955	0	0	0	0	0	0	0	0	0	0	0	1.56699	MICROARRAY: Pietrzyk_24194948_down_day28
DACT1	0	0	0	0	0	0	0	0	0	0	0	0	0	0	0	0	1.56522	0	0	0	0	0	0	0	0	0	0	0	0	0	0	1.56522	MICROARRAY: Pietrzyk_24194948_down_day28
MCUB	0	0	0	0	0	0	0	0	0	0	0	0	0	0	0	0	0	1.56243	0	0	0	0	0	0	0	0	0	0	0	0	0	1.56243	MICROARRAY: Pietrzyk_24194948_down_day5
CD40LG	0	0	0	0	0	0	0	0	0	0	0	0	0	0	0	0	1.56169	1.54759	0	0	0	0	0	0	0	0	0	0	0	0	0	1.56169	MICROARRAY: Pietrzyk_24194948_down_day28
PELO	0	0	0	0	0	0	0	0	0	0	0	0	0	0	0	0	1.55993	0	0	1.52971	0	0	0	0	0	0	0	0	0	0	0	1.55993	MICROARRAY: Pietrzyk_24194948_down_day28
TMEM263	0	0	0	0	0	0	0	0	0	0	0	0	0	0	0	0	1.55816	0	0	0	0	0	0	0	0	0	0	0	0	0	0	1.55816	MICROARRAY: Pietrzyk_24194948_down_day28
LIN28B	0	0	0	0	0	0	0	0	0	0	0	0	0	0	0	0	0	0	0	1.55651	0	0	0	0	0	0	0	0	0	0	0	1.55651	MICROARRAY: Pietrzyk_24194948_up_day5
TMEM50A	0	0	1.25219	1.54399	0	0	0	0	0	0	0	0	0	0	0	0	0	0	0	0	0	0	0	0	0	0	0	0	0	0	0	1.54399	EXOMESEQ: Luo_36514862_eqtl
CHI3L1	0	0	1.25219	1.54399	0	0	0	0	0	0	0	0	0	0	0	0	0	0	0	0	0	0	0	0	0	0	0	0	0	0	0	1.54399	EXOMESEQ: Luo_36514862_eqtl
ELANE	0	0	0	1.54399	0	0	0	0	0	0	0	0	0	0	0	0	0	0	0	0	0	0	0	0	0	0	0	0	0	0	0	1.54399	EXOMESEQ: Luo_36514862_eqtl
CTSG	0	0	0	1.54399	0	0	0	0	0	0	0	0	0	0	0	0	0	0	0	0	0	0	0	0	0	0	0	0	0	0	0	1.54399	EXOMESEQ: Luo_36514862_eqtl
MS4A3	0	0	0	1.54399	0	0	0	0	0	0	0	0	0	0	0	0	0	0	0	0	0	0	0	0	0	0	0	0	0	0	0	1.54399	EXOMESEQ: Luo_36514862_eqtl
DEFA4	0	0	0	1.54399	0	0	0	0	0	0	0	0	0	0	0	0	0	0	0	0	0	0	0	0	0	0	0	0	0	0	0	1.54399	EXOMESEQ: Luo_36514862_eqtl
MMP9	0	0	0	1.54399	0	0	0	0	0	0	0	0	0	0	0	0	0	0	0	0	0	0	0	0	0	0	0	0	0	0	0	1.54399	EXOMESEQ: Luo_36514862_eqtl
TCN1	0	0	0	1.54399	0	0	0	0	0	0	0	0	0	0	0	0	0	0	0	0	0	0	0	0	0	0	0	0	0	0	0	1.54399	EXOMESEQ: Luo_36514862_eqtl
CEACAM8	0	0	0	1.54399	0	0	0	0	0	0	0	0	0	0	0	0	0	0	0	0	0	0	0	0	0	0	0	0	0	0	0	1.54399	EXOMESEQ: Luo_36514862_eqtl
OLFM4	0	0	0	1.54399	0	0	0	0	0	0	0	0	0	0	0	0	0	0	0	0	0	0	0	0	0	0	0	0	0	0	0	1.54399	EXOMESEQ: Luo_36514862_eqtl
CLEC5	0	0	0	1.54399	0	0	0	0	0	0	0	0	0	0	0	0	0	0	0	0	0	0	0	0	0	0	0	0	0	0	0	1.54399	EXOMESEQ: Luo_36514862_eqtl
CNTNAP3B	0	0	0	1.54399	0	0	0	0	0	0	0	0	0	0	0	0	0	0	0	0	0	0	0	0	0	0	0	0	0	0	0	1.54399	EXOMESEQ: Luo_36514862_eqtl
OLAH	0	0	0	1.54399	0	0	0	0	0	0	0	0	0	0	0	0	0	0	0	0	0	0	0	0	0	0	0	0	0	0	0	1.54399	EXOMESEQ: Luo_36514862_eqtl
TAF15	0	0	0	1.54399	0	0	0	0	0	0	0	0	0	0	0	0	0	0	0	0	0	0	0	0	0	0	0	0	0	0	0	1.54399	EXOMESEQ: Luo_36514862_eqtl
CREB1	0	0	0	1.54399	0	0	0	0	0	0	0	0	0	0	0	0	0	0	0	0	0	0	0	0	0	0	0	0	0	0	0	1.54399	EXOMESEQ: Luo_36514862_eqtl
DDX42	0	0	0	1.54399	0	0	0	0	0	0	0	0	0	0	0	0	0	0	0	0	0	0	0	0	0	0	0	0	0	0	0	1.54399	EXOMESEQ: Luo_36514862_eqtl
CAVIN1	0	0	0	1.54399	0	0	0	0	0	0	0	0	0	0	0	0	0	0	0	0	0	0	0	0	0	0	0	0	0	0	0	1.54399	EXOMESEQ: Luo_36514862_eqtl
ZNF706	0	0	0	1.54399	0	0	0	0	0	0	0	0	0	0	0	0	0	0	0	0	0	0	0	0	0	0	0	0	0	0	0	1.54399	EXOMESEQ: Luo_36514862_eqtl
CASC15	0	0	0	1.54399	0	0	0	0	0	0	0	0	0	0	0	0	0	0	0	0	0	0	0	0	0	0	0	0	0	0	0	1.54399	EXOMESEQ: Luo_36514862_eqtl
CSPP1	0	0	0	1.54399	0	0	0	0	0	0	0	0	0	0	0	0	0	0	0	0	0	0	0	0	0	0	0	0	0	0	0	1.54399	EXOMESEQ: Luo_36514862_eqtl
STAT3	0	0	0	1.54399	0	0	0	0	0	0	0	0	0	0	0	0	0	0	0	0	0	0	0	0	0	0	0	0	0	0	0	1.54399	EXOMESEQ: Luo_36514862_eqtl
NETO2	0	0	0	1.54399	0	0	0	0	0	0	0	0	0	0	0	0	0	0	0	0	0	0	0	0	0	0	0	0	0	0	0	1.54399	EXOMESEQ: Luo_36514862_eqtl
SLC22A14	0	0	0	0	0	0	0	0	0	0	0	0	0	0	0	0	0	0	0	1.54333	0	0	0	0	0	0	0	0	0	0	0	1.54333	MICROARRAY: Pietrzyk_24194948_up_day5
AFP	0	0	0	0	0	0	0	0	0	0	1.38471	1.53607	0	0	0	0	0	0	0	0	0	0	0	0	0	0	0	0	0	0	0	1.53607	MASS_SPEC: Zasada_31445514_day36GA
SLC28A3	0	0	0	0	0	0	0	0	0	0	0	0	0	0	0	0	0	0	0	1.53328	0	0	0	0	0	0	0	0	0	0	0	1.53328	MICROARRAY: Pietrzyk_24194948_up_day5
FREM1	0	0	0	0	0	0	0	0	0	0	0	0	0	0	0	1.33233	0	0	0	1.53071	0	0	0	0	0	0	0	0	0	0	0	1.53071	MICROARRAY: Pietrzyk_24194948_up_day5
TMEM44	0	0	0	0	0	0	0	0	0	0	0	0	0	0	0	0	0	0	0	1.52986	0	0	0	0	0	0	0	0	0	0	0	1.52986	MICROARRAY: Pietrzyk_24194948_up_day5
ANKRD18B	0	0	0	0	0	0	0	0	0	0	0	0	0	0	0	0	0	0	0	1.52983	0	0	0	0	0	0	0	0	0	0	0	1.52983	MICROARRAY: Pietrzyk_24194948_up_day5
CABLES1	0	0	0	0	0	0	0	0	0	0	0	0	0	0	0	0	0	0	0	1.52979	0	0	0	0	0	0	0	0	0	0	0	1.52979	MICROARRAY: Pietrzyk_24194948_up_day5
GRB10	0	0	0	0	0	0	0	0	0	0	0	0	0	0	0	0	0	0	0	1.52979	0	0	0	0	0	0	0	0	0	0	0	1.52979	MICROARRAY: Pietrzyk_24194948_up_day5
GADD45A	0	0	0	0	0	0	0	0	0	0	0	0	0	0	0	0	0	0	0	1.52977	0	0	0	0	0	0	0	0	0	0	0	1.52977	MICROARRAY: Pietrzyk_24194948_up_day5
ZNF30	0	0	0	0	0	0	0	0	0	0	0	0	0	0	0	0	0	0	0	1.52975	0	0	0	0	0	0	0	0	0	0	0	1.52975	MICROARRAY: Pietrzyk_24194948_up_day5
PNPO	0	0	0	0	0	0	0	0	0	0	0	0	0	0	0	0	0	0	0	1.52974	0	0	0	0	0	0	0	0	0	0	0	1.52974	MICROARRAY: Pietrzyk_24194948_up_day5
TMEM99	0	0	0	0	0	0	0	0	0	0	0	0	0	0	0	0	0	0	0	1.52973	0	0	0	0	0	0	0	0	0	0	0	1.52973	MICROARRAY: Pietrzyk_24194948_up_day5
PPFIBP2	0	0	0	0	0	0	0	0	0	0	0	0	0	0	0	0	0	0	0	1.5297	0	0	0	0	0	0	0	0	0	0	0	1.5297	MICROARRAY: Pietrzyk_24194948_up_day5
KCNMB1	0	0	0	0	0	0	0	0	0	0	0	0	0	0	0	0	0	0	0	1.52967	0	0	0	0	0	0	0	0	0	0	0	1.52967	MICROARRAY: Pietrzyk_24194948_up_day5
DHRS4L2	0	0	0	0	0	0	0	0	0	0	0	0	0	0	0	0	0	0	0	1.52966	0	0	0	0	0	0	0	0	0	0	0	1.52966	MICROARRAY: Pietrzyk_24194948_up_day5
CD4	0	0	0	0	0	0	0	0	0	0	0	0	0	0	0	0	0	0	0	1.52965	0	0	0	0	0	0	0	0	0	0	0	1.52965	MICROARRAY: Pietrzyk_24194948_up_day5
MSANTD2	0	0	0	0	0	0	0	0	0	0	0	0	0	0	0	0	0	0	0	1.52962	0	0	0	0	0	0	0	0	0	0	0	1.52962	MICROARRAY: Pietrzyk_24194948_up_day5
RWDD2A	0	0	0	0	0	0	0	0	0	0	0	0	0	0	0	0	0	0	0	1.5296	0	0	0	0	0	0	0	0	0	0	0	1.5296	MICROARRAY: Pietrzyk_24194948_up_day5
GTPBP8	0	0	0	0	0	0	0	0	0	0	0	0	0	0	0	0	0	0	0	1.5296	0	0	0	0	0	0	0	0	0	0	0	1.5296	MICROARRAY: Pietrzyk_24194948_up_day5
PID1	0	0	0	0	0	0	0	0	0	0	0	0	0	0	0	0	0	0	0	1.52954	0	0	0	0	0	0	0	0	0	0	0	1.52954	MICROARRAY: Pietrzyk_24194948_up_day5
AKT3	0	0	0	0	0	0	0	0	0	0	0	0	0	0	0	0	0	0	0	1.52954	0	0	0	0	0	0	0	0	0	0	0	1.52954	MICROARRAY: Pietrzyk_24194948_up_day5
PRKX	0	0	0	0	0	0	0	0	0	0	0	0	0	0	0	0	0	0	0	1.52953	0	0	0	0	0	0	0	0	0	0	0	1.52953	MICROARRAY: Pietrzyk_24194948_up_day5
GSN	0	0	0	0	0	0	0	0	0	0	1.37912	1.51648	0	0	0	0	0	0	0	0	0	0	0	0	0	0	0	0	0	0	0	1.51648	MASS_SPEC: Zasada_31445514_day36GA
SLC30A4	0	0	0	0	0	0	0	0	0	0	0	0	0	0	0	0	0	1.51473	0	0	0	0	0	0	0	0	0	0	0	0	0	1.51473	MICROARRAY: Pietrzyk_24194948_down_day5
GALNT6	0	0	0	0	0	0	0	0	0	0	0	0	0	0	0	0	0	1.50727	0	0	0	0	0	0	0	0	0	0	0	0	0	1.50727	MICROARRAY: Pietrzyk_24194948_down_day5
HBB	0	0	0	0	0	0	0	0	0	0	1.3889	1.50669	0	0	0	0	0	0	0	0	0	0	0	0	0	0	0	0	0	0	0	1.50669	MASS_SPEC: Zasada_31445514_day36GA
RNF125	0	0	0	0	0	0	0	0	0	0	0	0	0	0	0	0	0	1.50473	0	0	0	0	0	0	0	0	0	0	0	0	0	1.50473	MICROARRAY: Pietrzyk_24194948_down_day5
TLR10	0	0	0	0	0	0	0	0	0	0	0	0	0	0	0	1.5044	0	0	0	0	0	0	0	0	0	0	0	0	0	0	0	1.5044	MICROARRAY: Gong_32412065
APOA1	0	0	0	0	0	0	0	0	0	0	1.38704	1.50179	0	0	0	0	0	0	0	0	0	0	0	0	0	0	0	0	0	0	0	1.50179	MASS_SPEC: Zasada_31445514_day36GA
CCDC191	0	0	0	0	0	0	0	0	0	0	0	0	0	0	0	1.49958	0	0	0	0	0	0	0	0	0	0	0	0	0	0	0	1.49958	MICROARRAY: Gong_32412065
CD5	0	0	0	0	0	0	0	0	0	0	0	0	0	0	0	0	0	1.49912	0	0	0	0	0	0	0	0	0	0	0	0	0	1.49912	MICROARRAY: Pietrzyk_24194948_down_day5
TCF7	0	0	0	0	0	0	0	0	0	0	0	0	0	0	0	0	0	1.49785	0	0	0	0	0	0	0	0	0	0	0	0	0	1.49785	MICROARRAY: Pietrzyk_24194948_down_day5
TBC1D8B	0	0	0	0	0	0	0	0	0	0	0	0	0	0	0	1.49722	0	0	0	0	0	0	0	0	0	0	0	0	0	0	0	1.49722	MICROARRAY: Gong_32412065
MTERF4	0	0	0	0	0	0	0	0	0	0	0	0	0	0	0	0	0	1.49646	0	0	0	0	0	0	0	0	0	0	0	0	0	1.49646	MICROARRAY: Pietrzyk_24194948_down_day5
PI4K2A	0	0	0	0	0	0	0	0	0	0	0	0	0	0	0	0	0	1.49633	0	0	0	0	0	0	0	0	0	0	0	0	0	1.49633	MICROARRAY: Pietrzyk_24194948_down_day5
CFAP97	0	0	0	0	0	0	0	0	0	0	0	0	0	0	0	0	0	1.49624	0	0	0	0	0	0	0	0	0	0	0	0	0	1.49624	MICROARRAY: Pietrzyk_24194948_down_day5
SYNJ2BP	0	0	0	0	0	0	0	0	0	0	0	0	0	0	0	0	0	1.49616	0	0	0	0	0	0	0	0	0	0	0	0	0	1.49616	MICROARRAY: Pietrzyk_24194948_down_day5
ZNF91	0	0	0	0	0	0	0	0	0	0	0	0	0	0	0	0	0	1.49603	0	0	0	0	0	0	0	0	0	0	0	0	0	1.49603	MICROARRAY: Pietrzyk_24194948_down_day5
BLNK	0	0	0	0	0	0	0	0	0	0	0	0	0	0	0	1.49259	0	0	0	0	0	0	0	0	0	0	0	0	0	0	0	1.49259	MICROARRAY: Gong_32412065
ITIH2	0	0	0	0	0	0	0	0	0	0	1.38611	1.492	0	0	0	0	0	0	0	0	0	0	0	0	0	0	0	0	0	0	0	1.492	MASS_SPEC: Zasada_31445514_day36GA
BANK1	0	0	0	0	0	0	0	0	0	0	0	0	0	0	0	1.49033	0	0	0	0	0	0	0	0	0	0	0	0	0	0	0	1.49033	MICROARRAY: Gong_32412065
LOC283710	0	0	0	0	0	0	0	0	0	0	0	0	0	0	0	1.4881	0	0	0	0	0	0	0	0	0	0	0	0	0	0	0	1.4881	MICROARRAY: Gong_32412065
APOA4	0	0	0	0	0	0	0	0	0	0	1.38378	1.4822	0	0	0	0	0	0	0	0	0	0	0	0	0	0	0	0	0	0	0	1.4822	MASS_SPEC: Zasada_31445514_day36GA
GGA2	0	0	0	0	0	0	0	0	0	0	0	0	0	0	0	1.47948	0	0	0	0	0	0	0	0	0	0	0	0	0	0	0	1.47948	MICROARRAY: Gong_32412065
LOC283663	0	0	0	0	0	0	0	0	0	0	0	0	0	0	0	1.4774	0	0	0	0	0	0	0	0	0	0	0	0	0	0	0	1.4774	MICROARRAY: Gong_32412065
CCDC180	0	0	0	0	0	0	0	0	0	0	0	0	0	0	0	1.47333	0	0	0	0	0	0	0	0	0	0	0	0	0	0	0	1.47333	MICROARRAY: Gong_32412065
CELSR1	0	0	0	0	0	0	0	0	0	0	0	0	0	0	0	1.47134	0	0	0	0	0	0	0	0	0	0	0	0	0	0	0	1.47134	MICROARRAY: Gong_32412065
SERPINF2	0	0	0	0	0	0	0	0	0	0	0	1.46751	0	0	0	0	0	0	0	0	0	0	0	0	0	0	0	0	0	0	0	1.46751	MASS_SPEC: Zasada_31445514_day36GA
FCGR2B	0	0	0	0	0	0	0	0	0	0	0	0	0	0	0	1.46744	0	0	0	0	0	0	0	0	0	0	0	0	0	0	0	1.46744	MICROARRAY: Gong_32412065
RPS26	0	0	0	0	0	0	0	0	0	0	0	0	0	0	0	1.46553	0	0	0	0	0	0	0	0	0	0	0	0	0	0	0	1.46553	MICROARRAY: Gong_32412065
BLK	0	0	0	0	0	0	0	0	0	0	0	0	0	0	0	1.46364	0	0	0	0	0	0	0	0	0	0	0	0	0	0	0	1.46364	MICROARRAY: Gong_32412065
TTR	0	0	0	0	0	0	0	0	0	1.29872	0	1.46261	0	0	0	0	0	0	0	0	0	0	0	0	0	0	0	0	0	0	0	1.46261	MASS_SPEC: Zasada_31445514_day36GA
IGHG1	0	0	0	0	0	0	0	0	0	1.29872	1.38191	1.45771	0	0	0	0	0	0	0	0	0	0	0	0	0	0	0	0	0	0	0	1.45771	MASS_SPEC: Zasada_31445514_day36GA
E2F5	0	0	0	0	0	0	0	0	0	0	0	0	0	0	0	1.45637	0	0	0	0	0	0	0	0	0	0	0	0	0	0	0	1.45637	MICROARRAY: Gong_32412065
NIBAN3	0	0	0	0	0	0	0	0	0	0	0	0	0	0	0	1.45461	0	0	0	0	0	0	0	0	0	0	0	0	0	0	0	1.45461	MICROARRAY: Gong_32412065
OSBPL10	0	0	0	0	0	0	0	0	0	0	0	0	0	0	0	1.45288	0	0	0	0	0	0	0	0	0	0	0	0	0	0	0	1.45288	MICROARRAY: Gong_32412065
SPP1	0	0	0	0	0	0	0	0	0	0	0	1.45282	0	0	0	0	0	0	0	0	0	0	0	0	0	0	0	0	0	0	0	1.45282	MASS_SPEC: Zasada_31445514_day36GA
SWAP70	0	0	0	0	0	0	0	0	0	0	0	0	0	0	0	1.44949	0	0	0	0	0	0	0	0	0	0	0	0	0	0	0	1.44949	MICROARRAY: Gong_32412065
TCL6	0	0	0	0	0	0	0	0	0	0	0	0	0	0	0	1.44459	0	0	0	0	0	0	0	0	0	0	0	0	0	0	0	1.44459	MICROARRAY: Gong_32412065
SNX22	0	0	0	0	0	0	0	0	0	0	0	0	0	0	0	1.443	0	0	0	0	0	0	0	0	0	0	0	0	0	0	0	1.443	MICROARRAY: Gong_32412065
SNX29	0	0	0	0	0	0	0	0	0	0	0	0	0	0	0	1.44143	0	0	0	0	0	0	0	0	0	0	0	0	0	0	0	1.44143	MICROARRAY: Gong_32412065
TCL1A	0	0	0	0	0	0	0	0	0	0	0	0	0	0	0	1.43988	0	0	0	0	0	0	0	0	0	0	0	0	0	0	0	1.43988	MICROARRAY: Gong_32412065
MS4A1	0	0	0	0	0	0	0	0	0	0	0	0	0	0	0	1.43836	0	0	0	0	0	0	0	0	0	0	0	0	0	0	0	1.43836	MICROARRAY: Gong_32412065
CPN2	0	0	0	0	0	0	0	0	0	0	1.38424	1.43813	0	0	0	0	0	0	0	0	0	0	0	0	0	0	0	0	0	0	0	1.43813	MASS_SPEC: Zasada_31445514_day36GA
MIR600HG	0	0	0	0	0	0	0	0	0	0	0	0	0	0	0	1.43537	0	0	0	0	0	0	0	0	0	0	0	0	0	0	0	1.43537	MICROARRAY: Gong_32412065
DENND5B	0	0	0	0	0	0	0	0	0	0	0	0	0	0	0	1.43391	0	0	0	0	0	0	0	0	0	0	0	0	0	0	0	1.43391	MICROARRAY: Gong_32412065
VTN	0	0	0	0	0	0	0	0	0	0	1.38564	1.43323	0	0	0	0	0	0	0	0	0	0	0	0	0	0	0	0	0	0	0	1.43323	MASS_SPEC: Zasada_31445514_day36GA
PSAT1	0	0	0	0	0	0	0	0	0	0	0	0	0	0	0	1.43247	0	0	0	0	0	0	0	0	0	0	0	0	0	0	0	1.43247	MICROARRAY: Gong_32412065
KNG1	0	0	0	0	0	0	0	0	0	0	0	1.42833	0	0	0	0	0	0	0	0	0	0	0	0	0	0	0	0	0	0	0	1.42833	MASS_SPEC: Zasada_31445514_day36GA
CD22	0	0	0	0	0	0	0	0	0	0	0	0	0	0	0	1.42827	0	0	0	0	0	0	0	0	0	0	0	0	0	0	0	1.42827	MICROARRAY: Gong_32412065
POU2AF1	0	0	0	0	0	0	0	0	0	0	0	0	1.38749	0	0	1.42691	0	0	0	0	0	0	0	0	0	0	0	0	0	0	0	1.42691	MICROARRAY: Gong_32412065
C1R	0	0	0	0	0	0	0	0	0	0	0	1.42343	0	0	0	0	0	0	0	0	0	0	0	0	0	0	0	0	0	0	0	1.42343	MASS_SPEC: Zasada_31445514_day36GA
CD19	0	0	0	0	0	0	0	0	0	0	0	0	0	0	0	1.42294	0	0	0	0	0	0	0	0	0	0	0	0	0	0	0	1.42294	MICROARRAY: Gong_32412065
HVCN1	0	0	0	0	0	0	0	0	0	0	0	0	0	0	0	1.42039	0	0	0	0	0	0	0	0	0	0	0	0	0	0	0	1.42039	MICROARRAY: Gong_32412065
MMP11	0	0	0	0	0	0	0	0	0	0	0	0	0	0	0	1.41913	0	0	0	0	0	0	0	0	0	0	0	0	0	0	0	1.41913	MICROARRAY: Gong_32412065
IGLC2	0	0	0	0	0	0	0	0	0	0	0	1.41854	0	0	0	0	0	0	0	0	0	0	0	0	0	0	0	0	0	0	0	1.41854	MASS_SPEC: Zasada_31445514_day36GA
MORN4	0	0	0	0	0	0	0	0	0	0	0	0	0	0	0	1.4179	0	0	0	0	0	0	0	0	0	0	0	0	0	0	0	1.4179	MICROARRAY: Gong_32412065
ADAM28	0	0	0	0	0	0	0	0	0	0	0	0	0	0	0	1.41669	0	0	0	0	0	0	0	0	0	0	0	0	0	0	0	1.41669	MICROARRAY: Gong_32412065
SMIM14	0	0	0	0	0	0	0	0	0	0	0	0	0	0	0	1.41431	0	0	0	0	0	0	0	0	0	0	0	0	0	0	0	1.41431	MICROARRAY: Gong_32412065
SERPINA6	0	0	0	0	0	0	0	0	0	0	1.37772	1.41364	0	0	0	0	0	0	0	0	0	0	0	0	0	0	0	0	0	0	0	1.41364	MASS_SPEC: Zasada_31445514_day36GA
SLC9A7P1	0	0	0	0	0	0	0	0	0	0	0	0	0	0	0	1.41314	0	0	0	0	0	0	0	0	0	0	0	0	0	0	0	1.41314	MICROARRAY: Gong_32412065
ABCB4	0	0	0	0	0	0	0	0	0	0	0	0	0	0	0	1.41086	0	0	0	0	0	0	0	0	0	0	0	0	0	0	0	1.41086	MICROARRAY: Gong_32412065
GABRA3	0	0	0	0	0	0	0	0	0	0	0	0	0	0	0	1.40974	0	0	0	0	0	0	0	0	0	0	0	0	0	0	0	1.40974	MICROARRAY: Gong_32412065
FGG	0	0	0	0	0	0	0	0	0	0	0	1.40874	0	0	0	0	0	0	0	0	0	0	0	0	0	0	0	0	0	0	0	1.40874	MASS_SPEC: Zasada_31445514_day36GA
PRKY	0	0	0	0	0	0	0	0	0	0	0	0	0	0	0	1.40864	0	0	0	0	0	0	0	0	0	0	0	0	0	0	0	1.40864	MICROARRAY: Gong_32412065
VPREB3	0	0	0	0	0	0	0	0	0	0	0	0	0	0	0	1.40755	0	0	0	0	0	0	0	0	0	0	0	0	0	0	0	1.40755	MICROARRAY: Gong_32412065
BORA	0	0	0	0	0	0	0	0	0	0	0	0	0	0	0	0	0	0	0	0	0	0	0	0	0	0	0	0	1.40719	0	0	1.40719	RNASEQ: Yuon_chou_37507442_deg_cord
LOC100131820	0	0	0	0	0	0	0	0	0	0	0	0	0	0	0	1.40543	0	0	0	0	0	0	0	0	0	0	0	0	0	0	0	1.40543	MICROARRAY: Gong_32412065
TPK1	0	0	0	0	0	0	0	0	0	0	0	0	0	0	0	0	0	0	0	0	0	0	0	0	0	0	0	0	1.40356	0	0	1.40356	RNASEQ: Yuon_chou_37507442_deg_cord
CD72	0	0	0	0	0	0	0	0	0	0	0	0	0	0	0	1.40336	0	0	0	0	0	0	0	0	0	0	0	0	0	0	0	1.40336	MICROARRAY: Gong_32412065
TDRD9	0	0	0	0	0	0	0	0	0	0	0	0	0	0	0	1.40135	0	0	0	0	0	0	0	0	0	0	0	0	0	0	0	1.40135	MICROARRAY: Gong_32412065
MMUT	0	0	0	0	0	0	0	0	0	0	0	0	0	0	0	0	0	0	0	0	0	0	0	0	0	0	0	0	1.40001	0	0	1.40001	RNASEQ: Yuon_chou_37507442_deg_cord
LOC100130811	0	0	0	0	0	0	0	0	0	0	0	0	0	0	0	1.3994	0	0	0	0	0	0	0	0	0	0	0	0	0	0	0	1.3994	MICROARRAY: Gong_32412065
IGFBP2	0	0	0	0	0	0	0	0	0	0	0	0	0	0	0	1.39844	0	0	0	0	0	0	0	0	0	0	0	0	0	0	0	1.39844	MICROARRAY: Gong_32412065
RAD51	0	0	0	0	0	0	0	0	0	0	0	0	0	0	0	0	0	0	0	0	0	0	0	0	0	0	0	0	1.39827	0	0	1.39827	RNASEQ: Yuon_chou_37507442_deg_cord
ZDHHC23	0	0	0	0	0	0	0	0	0	0	0	0	0	0	0	1.3975	0	0	0	0	0	0	0	0	0	0	0	0	0	0	0	1.3975	MICROARRAY: Gong_32412065
FST	0	0	0	0	0	0	0	0	0	0	0	0	0	0	0	0	0	0	0	0	0	0	0	0	0	0	0	0	1.39654	0	0	1.39654	RNASEQ: Yuon_chou_37507442_deg_cord
SNX25	0	0	0	0	0	0	0	0	0	0	0	0	0	0	0	1.39565	0	0	0	0	0	0	0	0	0	0	0	0	0	0	0	1.39565	MICROARRAY: Gong_32412065
HS3ST1	0	0	0	0	0	0	0	0	0	0	0	0	0	0	0	1.39475	0	0	0	0	0	0	0	0	0	0	0	0	0	0	0	1.39475	MICROARRAY: Gong_32412065
CAPS2	0	0	0	0	0	0	0	0	0	0	0	0	0	0	0	0	0	0	0	0	0	0	0	0	0	0	0	1.146	1.39315	0	0	1.39315	RNASEQ: Yuon_chou_37507442_deg_cord
MYO1B	0	0	0	0	0	0	0	0	0	0	0	0	0	0	0	1.39211	0	0	0	0	0	0	0	0	0	0	0	0	0	0	0	1.39211	MICROARRAY: Gong_32412065
UBE2R2	0	0	0	0	0	0	0	0	0	0	0	0	0	0	0	0	0	0	0	0	0	0	0	0	0	0	0	0	1.39148	0	0	1.39148	RNASEQ: Yuon_chou_37507442_deg_cord
NXPH4	0	0	0	0	0	0	0	0	0	0	0	0	0	0	0	1.39126	0	0	0	0	0	0	0	0	0	0	0	0	0	0	0	1.39126	MICROARRAY: Gong_32412065
HPX	0	0	0	0	0	0	0	0	0	0	1.39077	0	0	0	0	0	0	0	0	0	0	0	0	0	0	0	0	0	0	0	0	1.39077	MASS_SPEC: Zasada_31445514
GLIDR	0	0	0	0	0	0	0	0	0	0	0	0	0	0	0	1.39041	0	0	0	0	0	0	0	0	0	0	0	0	0	0	0	1.39041	MICROARRAY: Gong_32412065
A2M	0	0	0	0	0	0	0	0	0	0	1.3903	0	0	0	0	0	0	0	0	0	0	0	0	0	0	0	0	0	0	0	0	1.3903	MASS_SPEC: Zasada_31445514
PCLO	0	0	0	0	0	0	0	0	0	0	0	0	0	0	0	0	0	0	0	0	0	0	0	0	0	0	0	0	1.38983	0	0	1.38983	RNASEQ: Yuon_chou_37507442_deg_cord
HLA-DQB2	0	0	0	0	0	0	0	0	0	0	0	0	0	0	0	1.38958	0	0	0	0	0	0	0	0	0	0	0	0	0	0	0	1.38958	MICROARRAY: Gong_32412065
SERPINA3	0	0	0	0	0	0	0	0	0	0	1.38937	0	0	0	0	0	0	0	0	0	0	0	0	0	0	0	0	0	0	0	0	1.38937	MASS_SPEC: Zasada_31445514
P2RX5	0	0	0	0	0	0	0	0	0	0	0	0	0	0	0	1.38876	0	0	0	0	0	0	0	0	0	0	0	0	0	0	0	1.38876	MICROARRAY: Gong_32412065
KIF20A	0	0	0	0	0	0	0	0	0	0	0	0	0	0	0	0	0	0	0	0	0	0	0	0	0	0	0	0	1.3882	0	0	1.3882	RNASEQ: Yuon_chou_37507442_deg_cord
SERPING1	0	0	0	0	0	0	0	0	0	0	1.38797	0	0	0	0	0	0	0	0	0	0	0	0	0	0	0	0	0	0	0	0	1.38797	MASS_SPEC: Zasada_31445514
FLJ45832	0	0	0	0	0	0	0	0	0	0	0	0	0	0	0	1.38796	0	0	0	0	0	0	0	0	0	0	0	0	0	0	0	1.38796	MICROARRAY: Gong_32412065
CPA3	0	0	0	0	0	0	0	0	0	0	0	0	1.38749	0	0	1.34319	0	0	0	0	0	0	0	0	0	0	0	0	0	0	0	1.38749	MICROARRAY: Bharracharya_22723293
CCL18	0	0	0	0	0	0	0	0	0	0	0	0	1.38749	0	0	0	0	0	0	0	0	0	0	0	0	0	0	0	0	0	0	1.38749	MICROARRAY: Bharracharya_22723293
TPSB2	0	0	0	0	0	0	0	0	0	0	0	0	1.38749	0	0	0	0	0	0	0	0	0	0	0	0	0	0	0	0	0	0	1.38749	MICROARRAY: Bharracharya_22723293
TPSAB1	0	0	0	0	0	0	0	0	0	0	0	0	1.38749	0	0	0	0	0	0	0	0	0	0	0	0	0	0	0	0	0	0	1.38749	MICROARRAY: Bharracharya_22723293
ALDH1A3	0	0	0	0	0	0	0	0	0	0	0	0	1.38749	0	0	0	0	0	0	0	0	0	0	0	0	0	0	0	0	0	0	1.38749	MICROARRAY: Bharracharya_22723293
IGHM	0	0	0	0	0	0	0	0	0	0	0	0	1.38749	0	0	0	0	0	0	0	0	0	0	0	0	0	0	0	0	0	0	1.38749	MICROARRAY: Bharracharya_22723293
BPIFA1	0	0	0	0	0	0	0	0	0	0	0	0	1.38749	0	0	0	0	0	0	0	0	0	0	0	0	0	0	0	0	0	0	1.38749	MICROARRAY: Bharracharya_22723293
FABP4	0	0	0	0	0	0	0	0	0	0	0	0	1.38749	0	0	0	0	0	0	0	0	0	0	0	0	0	0	0	0	0	0	1.38749	MICROARRAY: Bharracharya_22723293
DNAJC5B	0	0	0	0	0	0	0	0	0	0	0	0	1.38749	0	0	0	0	0	0	0	0	0	0	0	0	0	0	0	0	0	0	1.38749	MICROARRAY: Bharracharya_22723293
CXCL13	0	0	0	0	0	0	0	0	0	0	0	0	1.38749	0	0	0	0	0	0	0	0	0	0	0	0	0	0	0	0	0	0	1.38749	MICROARRAY: Bharracharya_22723293
CEACAM5	0	0	0	0	0	0	0	0	0	0	0	0	1.38749	0	0	0	0	0	0	0	0	0	0	0	0	0	0	0	0	0	0	1.38749	MICROARRAY: Bharracharya_22723293
COMP	0	0	0	0	0	0	0	0	0	0	0	0	1.38749	0	0	0	0	0	0	0	0	0	0	0	0	0	0	0	0	0	0	1.38749	MICROARRAY: Bharracharya_22723293
JCHAIN	0	0	0	0	0	0	0	0	0	0	0	0	1.38749	0	0	0	0	0	0	0	0	0	0	0	0	0	0	0	0	0	0	1.38749	MICROARRAY: Bharracharya_22723293
CH25H	0	0	0	0	0	0	0	0	0	0	0	0	1.38749	0	0	0	0	0	0	0	0	0	0	0	0	0	0	0	0	0	0	1.38749	MICROARRAY: Bharracharya_22723293
LGALS3	0	0	0	0	0	0	0	0	0	0	0	0	1.38749	0	0	0	0	0	0	0	0	1.29875	0	0	0	0	0	0	0	0	0	1.38749	MICROARRAY: Bharracharya_22723293
SFN	0	0	0	0	0	0	0	0	0	0	0	0	1.38749	0	0	0	0	0	0	0	0	0	0	0	0	0	0	0	0	0	0	1.38749	MICROARRAY: Bharracharya_22723293
IGL	0	0	0	0	0	0	0	0	0	0	0	0	1.38749	0	0	0	0	0	0	0	0	0	0	0	0	0	0	0	0	0	0	1.38749	MICROARRAY: Bharracharya_22723293
COL8A1	0	0	0	0	0	0	0	0	0	0	0	0	1.38749	0	0	0	0	0	0	0	0	0	0	0	0	0	0	0	0	0	0	1.38749	MICROARRAY: Bharracharya_22723293
RBP4	0	0	0	0	0	0	0	0	0	0	0	0	1.38749	0	0	0	0	0	0	0	0	0	0	0	0	0	0	0	0	0	0	1.38749	MICROARRAY: Bharracharya_22723293
TDO2	0	0	0	0	0	0	0	0	0	0	0	0	1.38749	0	0	0	0	0	0	0	0	0	0	0	0	0	0	0	0	0	0	1.38749	MICROARRAY: Bharracharya_22723293
HDC	0	0	0	0	0	0	0	0	0	0	0	0	1.38749	0	0	0	0	0	0	0	0	0	0	0	0	0	0	0	0	0	0	1.38749	MICROARRAY: Bharracharya_22723293
MSMB	0	0	0	0	0	0	0	0	0	0	0	0	1.38749	0	0	0	0	0	0	0	0	0	0	0	0	0	0	0	0	0	0	1.38749	MICROARRAY: Bharracharya_22723293
INHBA	0	0	0	0	0	0	0	0	0	0	0	0	1.38749	0	0	0	0	0	0	0	0	0	0	0	0	0	0	0	0	0	0	1.38749	MICROARRAY: Bharracharya_22723293
STEAP1	0	0	0	0	0	0	0	0	0	0	0	0	1.38749	0	0	0	0	0	0	0	0	0	0	0	0	0	0	0	0	0	0	1.38749	MICROARRAY: Bharracharya_22723293
PCOLCE2	0	0	0	0	0	0	0	0	0	0	0	0	1.38749	0	0	0	0	0	0	0	0	0	0	0	0	0	0	0	0	0	0	1.38749	MICROARRAY: Bharracharya_22723293
PBK	0	0	0	0	0	0	0	0	0	0	0	0	1.38749	0	0	0	0	0	0	0	0	0	0	0	0	0	0	0	0	0	0	1.38749	MICROARRAY: Bharracharya_22723293
PAPPA	0	0	0	0	0	0	0	0	0	0	0	0	1.38749	0	0	0	0	0	0	0	0	0	0	0	0	0	0	0	0	0	0	1.38749	MICROARRAY: Bharracharya_22723293
NEIL3	0	0	0	0	0	0	0	0	0	0	0	0	1.38749	0	0	0	0	0	0	0	0	0	0	0	0	0	0	0	0	0	0	1.38749	MICROARRAY: Bharracharya_22723293
APOBEC3B	0	0	0	0	0	0	0	0	0	0	0	0	1.38749	0	0	0	0	0	0	0	0	0	0	0	0	0	0	0	0	0	0	1.38749	MICROARRAY: Bharracharya_22723293
ADTRP	0	0	0	0	0	0	0	0	0	0	0	0	1.38749	0	0	0	0	0	0	0	0	0	0	0	0	0	0	0	0	0	0	1.38749	MICROARRAY: Bharracharya_22723293
PSCA	0	0	0	0	0	0	0	0	0	0	0	0	1.38749	0	0	0	0	0	0	0	0	0	0	0	0	0	0	0	0	0	0	1.38749	MICROARRAY: Bharracharya_22723293
ADAMTS16	0	0	0	0	0	0	0	0	0	0	0	0	1.38749	0	0	0	0	0	0	0	0	0	0	0	0	0	0	0	0	0	0	1.38749	MICROARRAY: Bharracharya_22723293
DOK5	0	0	0	0	0	0	0	0	0	0	0	0	1.38749	0	0	0	0	0	0	0	0	0	0	0	0	0	0	0	0	0	0	1.38749	MICROARRAY: Bharracharya_22723293
CXCL5	0	0	0	0	0	0	0	0	0	0	0	0	1.38749	0	0	0	0	0	0	0	0	0	0	0	0	0	0	0	0	0	0	1.38749	MICROARRAY: Bharracharya_22723293
DKK1	0	0	0	0	0	0	0	0	0	0	0	0	1.38749	0	0	0	0	0	0	0	0	0	0	0	0	0	0	0	0	0	0	1.38749	MICROARRAY: Bharracharya_22723293
CDK1	0	0	0	0	0	0	0	0	0	0	0	0	1.38749	0	0	0	0	0	0	0	0	0	0	0	0	0	0	0	0	0	0	1.38749	MICROARRAY: Bharracharya_22723293
CGA	0	0	0	0	0	0	0	0	0	0	0	0	1.38749	0	0	0	0	0	0	0	0	0	0	0	0	0	0	0	0	0	0	1.38749	MICROARRAY: Bharracharya_22723293
HCAR3	0	0	0	0	0	0	0	0	0	0	0	0	1.38749	0	0	0	0	0	0	0	0	0	0	0	0	0	0	0	0	0	0	1.38749	MICROARRAY: Bharracharya_22723293
P4HA3	0	0	0	0	0	0	0	0	0	0	0	0	1.38749	0	0	0	0	0	0	0	0	0	0	0	0	0	0	0	0	0	0	1.38749	MICROARRAY: Bharracharya_22723293
DIO2	0	0	0	0	0	0	0	0	0	0	0	0	1.38749	0	0	0	0	0	0	0	0	0	0	0	0	0	0	0	0	0	0	1.38749	MICROARRAY: Bharracharya_22723293
IGK	0	0	0	0	0	0	0	0	0	0	0	0	1.38749	0	0	0	0	0	0	0	0	0	0	0	0	0	0	0	0	0	0	1.38749	MICROARRAY: Bharracharya_22723293
ACP5	0	0	0	0	0	0	0	0	0	0	0	0	1.38749	0	0	0	0	0	0	0	0	0	0	0	0	0	0	0	0	0	0	1.38749	MICROARRAY: Bharracharya_22723293
BHLHE22	0	0	0	0	0	0	0	0	0	0	0	0	1.38749	0	0	0	0	0	0	0	0	0	0	0	0	0	0	0	0	0	0	1.38749	MICROARRAY: Bharracharya_22723293
HILPDA	0	0	0	0	0	0	0	0	0	0	0	0	1.38749	0	0	0	0	0	0	0	0	0	0	0	0	0	0	0	0	0	0	1.38749	MICROARRAY: Bharracharya_22723293
TMTC1	0	0	0	0	0	0	0	0	0	0	0	0	1.38749	0	1.31071	0	0	0	0	0	0	0	0	0	0	0	0	0	0	0	0	1.38749	MICROARRAY: Bharracharya_22723293
CA12	0	0	0	0	0	0	0	0	0	0	0	0	1.38749	0	0	0	0	0	0	0	0	0	0	0	0	0	0	0	0	0	0	1.38749	MICROARRAY: Bharracharya_22723293
SFRP2	0	0	0	0	0	0	0	0	0	0	0	0	1.38749	0	0	0	0	0	0	0	0	0	0	0	0	0	0	0	0	0	0	1.38749	MICROARRAY: Bharracharya_22723293
KRT17	0	0	0	0	0	0	0	0	0	0	0	0	1.38749	0	0	0	0	0	0	0	0	0	0	0	0	0	0	0	0	0	0	1.38749	MICROARRAY: Bharracharya_22723293
TARP	0	0	0	0	0	0	0	0	0	0	0	0	1.38749	0	0	0	0	0	0	0	0	0	0	0	0	0	0	0	0	0	0	1.38749	MICROARRAY: Bharracharya_22723293
SKA1	0	0	0	0	0	0	0	0	0	0	0	0	1.38749	0	0	0	0	0	0	0	0	0	0	0	0	0	0	0	0	0	0	1.38749	MICROARRAY: Bharracharya_22723293
MXRA5	0	0	0	0	0	0	0	0	0	0	0	0	1.38749	0	1.31071	0	0	0	0	0	0	0	0	0	0	0	0	0	0	0	0	1.38749	MICROARRAY: Bharracharya_22723293
CDCP1	0	0	0	0	0	0	0	0	0	0	0	0	1.38749	0	0	0	0	0	0	0	0	0	0	0	0	0	0	0	0	0	0	1.38749	MICROARRAY: Bharracharya_22723293
C1QB	0	0	0	0	0	0	0	0	0	0	0	0	1.38749	0	0	1.34222	0	0	0	0	0	0	0	0	0	0	0	0	0	0	0	1.38749	MICROARRAY: Bharracharya_22723293
PCLAF	0	0	0	0	0	0	0	0	0	0	0	0	1.38749	0	0	0	0	0	0	0	0	0	0	0	0	0	0	0	0	0	0	1.38749	MICROARRAY: Bharracharya_22723293
LIPG	0	0	0	0	0	0	0	0	0	0	0	0	1.38749	0	0	0	0	0	0	0	0	0	0	0	0	0	0	0	0	0	0	1.38749	MICROARRAY: Bharracharya_22723293
MS4A2	0	0	0	0	0	0	0	0	0	0	0	0	1.38749	0	0	0	0	0	0	0	0	0	0	0	0	0	0	0	0	0	0	1.38749	MICROARRAY: Bharracharya_22723293
IL17RB	0	0	0	0	0	0	0	0	0	0	0	0	1.38749	0	0	0	0	0	0	0	0	0	0	0	0	0	0	0	0	0	0	1.38749	MICROARRAY: Bharracharya_22723293
HS3ST2	0	0	0	0	0	0	0	0	0	0	0	0	1.38749	0	0	0	0	0	0	0	0	0	0	0	0	0	0	0	0	0	0	1.38749	MICROARRAY: Bharracharya_22723293
MND1	0	0	0	0	0	0	0	0	0	0	0	0	1.38749	0	0	0	0	0	0	0	0	0	0	0	0	0	0	0	0	0	0	1.38749	MICROARRAY: Bharracharya_22723293
DEPP1	0	0	0	0	0	0	0	0	0	0	0	0	1.38749	0	1.31071	0	0	0	0	0	0	0	0	0	0	0	0	0	0	0	0	1.38749	MICROARRAY: Bharracharya_22723293
POSTN	0	0	0	0	0	0	0	0	0	0	0	0	1.38749	0	0	0	0	0	0	0	0	0	0	0	0	0	0	0	0	0	0	1.38749	MICROARRAY: Bharracharya_22723293
HLA‐DRB4	0	0	0	0	0	0	0	0	0	0	0	0	1.38749	0	0	0	0	0	0	0	0	0	0	0	0	0	0	0	0	0	0	1.38749	MICROARRAY: Bharracharya_22723293
ADCYAP1	0	0	0	0	0	0	0	0	0	0	0	0	1.38749	0	0	0	0	0	0	0	0	0	0	0	0	0	0	0	0	0	0	1.38749	MICROARRAY: Bharracharya_22723293
CCD102B	0	0	0	0	0	0	0	0	0	0	0	0	1.38749	0	0	0	0	0	0	0	0	0	0	0	0	0	0	0	0	0	0	1.38749	MICROARRAY: Bharracharya_22723293
TPX2	0	0	0	0	0	0	0	0	0	0	0	0	1.38749	0	0	0	0	0	0	0	0	0	0	0	0	0	0	0	0	0	0	1.38749	MICROARRAY: Bharracharya_22723293
IGF1	0	0	0	0	0	0	0	0	0	0	0	0	1.38749	0	0	0	0	0	0	0	0	0	0	0	0	0	0	0	0	0	0	1.38749	MICROARRAY: Bharracharya_22723293
CDKN3	0	0	0	0	0	0	0	0	0	0	0	0	1.38749	0	0	0	0	0	0	0	0	0	0	0	0	0	0	0	0	0	0	1.38749	MICROARRAY: Bharracharya_22723293
DHRS9	0	0	0	0	0	0	0	0	0	0	0	0	1.38749	0	0	0	0	0	0	0	0	0	0	0	0	0	0	0	0	0	0	1.38749	MICROARRAY: Bharracharya_22723293
CYP24A1	0	0	0	0	0	0	0	0	0	0	0	0	1.38749	0	0	0	0	0	0	0	0	0	0	0	0	0	0	0	0	0	0	1.38749	MICROARRAY: Bharracharya_22723293
LIF	0	0	0	0	0	0	0	0	0	0	0	0	1.38749	0	0	0	0	0	0	0	0	0	0	0	0	0	0	0	0	0	0	1.38749	MICROARRAY: Bharracharya_22723293
SH3RF2	0	0	0	0	0	0	0	0	0	0	0	0	1.38749	0	0	0	0	0	0	0	0	0	0	0	0	0	0	0	0	0	0	1.38749	MICROARRAY: Bharracharya_22723293
TMEM158	0	0	0	0	0	0	0	0	0	0	0	0	1.38749	0	0	0	0	0	0	0	0	0	0	0	0	0	0	0	0	0	0	1.38749	MICROARRAY: Bharracharya_22723293
DIAPH3	0	0	0	0	0	0	0	0	0	0	0	0	1.38749	0	0	0	0	0	0	0	0	0	0	0	0	0	0	0	0	0	0	1.38749	MICROARRAY: Bharracharya_22723293
ADCYAP1R1	0	0	0	0	0	0	0	0	0	0	0	0	1.38749	0	0	0	0	0	0	0	0	0	0	0	0	0	0	0	0	0	0	1.38749	MICROARRAY: Bharracharya_22723293
CA4	0	0	0	0	0	0	0	0	0	0	0	0	1.38749	0	0	0	0	0	0	0	0	0	0	0	0	0	0	0	0	0	0	1.38749	MICROARRAY: Bharracharya_22723293
LRRC15	0	0	0	0	0	0	0	0	0	0	0	0	1.38749	0	0	0	0	0	0	0	0	0	0	0	0	0	0	0	0	0	0	1.38749	MICROARRAY: Bharracharya_22723293
COL4A6	0	0	0	0	0	0	0	0	0	0	0	0	1.38749	0	0	0	0	0	0	0	0	0	0	0	0	0	0	0	0	0	0	1.38749	MICROARRAY: Bharracharya_22723293
UGT2B17	0	0	0	0	0	0	0	0	0	0	0	0	1.38749	0	0	0	0	0	0	0	0	0	0	0	0	0	0	0	0	0	0	1.38749	MICROARRAY: Bharracharya_22723293
XIST	0	0	0	0	0	0	0	0	0	0	0	0	1.38749	0	0	1.36582	0	0	0	0	1.01584	0	0	0	0	0	0	0	0	0	0	1.38749	MICROARRAY: Bharracharya_22723293
SOX11	0	0	0	0	0	0	0	0	0	0	0	0	1.38749	0	0	0	0	0	0	0	0	0	0	0	0	0	0	0	0	0	0	1.38749	MICROARRAY: Bharracharya_22723293
KCNJ16	0	0	0	0	0	0	0	0	0	0	0	0	1.38749	0	0	0	0	0	0	0	0	0	0	0	0	0	0	0	0	0	0	1.38749	MICROARRAY: Bharracharya_22723293
HHIP	0	0	0	0	0	0	0	0	0	0	0	0	1.38749	0	0	0	0	0	0	0	0	0	0	0	0	0	0	0	0	0	0	1.38749	MICROARRAY: Bharracharya_22723293
ALPP	0	0	0	0	0	0	0	0	0	0	0	0	1.38749	0	0	0	0	0	0	0	0	0	0	0	0	0	0	0	0	0	0	1.38749	MICROARRAY: Bharracharya_22723293
SLC27A6	0	0	0	0	0	0	0	0	0	0	0	0	1.38749	0	0	0	0	0	0	0	0	0	0	0	0	0	0	0	0	0	0	1.38749	MICROARRAY: Bharracharya_22723293
PRND	0	0	0	0	0	0	0	0	0	0	0	0	1.38749	0	0	0	0	0	0	0	0	0	0	0	0	0	0	0	0	0	0	1.38749	MICROARRAY: Bharracharya_22723293
TTLL6	0	0	0	0	0	0	0	0	0	0	0	0	1.38749	0	0	0	0	0	0	0	0	0	0	0	0	0	0	0	0	0	0	1.38749	MICROARRAY: Bharracharya_22723293
CSMD1	0	0	0	0	0	0	0	0	0	0	0	0	1.38749	0	0	0	0	0	0	0	0	0	0	0	0	0	0	0	0	0	0	1.38749	MICROARRAY: Bharracharya_22723293
CCL22	0	0	0	0	0	0	0	0	0	0	0	0	1.38749	0	0	0	0	0	0	0	0	0	0	0	0	0	0	0	0	0	0	1.38749	MICROARRAY: Bharracharya_22723293
AADAC	0	0	0	0	0	0	0	0	0	0	0	0	1.38749	0	0	0	0	0	0	0	0	0	0	0	0	0	0	0	0	0	0	1.38749	MICROARRAY: Bharracharya_22723293
APOH	0	0	0	0	0	0	0	0	0	0	0	0	1.38749	0	0	0	0	0	0	0	0	0	0	0	0	0	0	0	0	0	0	1.38749	MICROARRAY: Bharracharya_22723293
GPIHBP1	0	0	0	0	0	0	0	0	0	0	0	0	1.38749	0	0	0	0	0	0	0	0	0	0	0	0	0	0	0	0	0	0	1.38749	MICROARRAY: Bharracharya_22723293
LRRC2	0	0	0	0	0	0	0	0	0	0	0	0	1.38749	0	0	0	0	0	0	0	0	0	0	0	0	0	0	0	0	0	0	1.38749	MICROARRAY: Bharracharya_22723293
GSTT1	0	0	0	0	0	0	0	0	0	0	0	0	1.38749	0	0	0	0	0	0	0	0	0	0	0	0	0	0	0	0	0	0	1.38749	MICROARRAY: Bharracharya_22723293
PLPPR1	0	0	0	0	0	0	0	0	0	0	0	0	1.38749	0	0	0	0	0	0	0	0	0	0	0	0	0	0	0	0	0	0	1.38749	MICROARRAY: Bharracharya_22723293
SOSTDC1	0	0	0	0	0	0	0	0	0	0	0	0	1.38749	0	0	0	0	0	0	0	0	0	0	0	0	0	0	0	0	0	0	1.38749	MICROARRAY: Bharracharya_22723293
UPK3B	0	0	0	0	0	0	0	0	0	0	0	0	1.38749	0	0	0	0	0	0	0	0	0	0	0	0	0	0	0	0	0	0	1.38749	MICROARRAY: Bharracharya_22723293
SLCO1A2	0	0	0	0	0	0	0	0	0	0	0	0	1.38749	0	0	0	0	0	0	0	0	0	0	0	0	0	0	0	0	0	0	1.38749	MICROARRAY: Bharracharya_22723293
OLFM3	0	0	0	0	0	0	0	0	0	0	0	0	1.38749	0	0	0	0	0	0	0	0	0	0	0	0	0	0	0	0	0	0	1.38749	MICROARRAY: Bharracharya_22723293
VGLL1	0	0	0	0	0	0	0	0	0	0	0	0	1.38749	0	0	0	0	0	0	0	0	0	0	0	0	0	0	0	0	0	0	1.38749	MICROARRAY: Bharracharya_22723293
EDN3	0	0	0	0	0	0	0	0	0	0	0	0	1.38749	0	0	0	0	0	0	0	0	0	0	0	0	0	0	0	0	0	0	1.38749	MICROARRAY: Bharracharya_22723293
PNOC	0	0	0	0	0	0	0	0	0	0	0	0	0	0	0	1.38716	0	0	0	0	0	0	0	0	0	0	0	0	0	0	0	1.38716	MICROARRAY: Gong_32412065
SCFD2	0	0	0	0	0	0	0	0	0	0	0	0	0	0	0	0	0	0	0	0	0	0	0	0	0	0	0	0	1.38659	0	0	1.38659	RNASEQ: Yuon_chou_37507442_deg_cord
C1orf220	0	0	0	0	0	0	0	0	0	0	0	0	0	0	0	1.38638	0	0	0	0	0	0	0	0	0	0	0	0	0	0	0	1.38638	MICROARRAY: Gong_32412065
FLJ38379	0	0	0	0	0	0	0	0	0	0	0	0	0	0	0	1.3856	0	0	0	0	0	0	0	0	0	0	0	0	0	0	0	1.3856	MICROARRAY: Gong_32412065
ANP32E	0	0	0	0	0	0	0	0	0	0	0	0	0	0	0	0	0	0	0	0	0	0	0	0	0	0	0	0	1.385	0	0	1.385	RNASEQ: Yuon_chou_37507442_deg_cord
CLECL1	0	0	0	0	0	0	0	0	0	0	0	0	0	0	0	1.38484	0	0	0	0	0	0	0	0	0	0	0	0	0	0	0	1.38484	MICROARRAY: Gong_32412065
SYNJ1	0	0	0	0	0	0	0	0	0	0	0	0	0	0	0	0	0	0	0	0	0	0	0	0	0	0	0	0	1.38342	0	0	1.38342	RNASEQ: Yuon_chou_37507442_deg_cord
LDOC1	0	0	0	0	0	0	0	0	0	0	0	0	0	0	0	1.38334	0	0	0	0	0	1.29875	0	0	0	0	0	0	0	0	0	1.38334	MICROARRAY: Gong_32412065
LUM	0	0	0	0	0	0	0	0	0	0	1.38331	0	0	0	0	0	0	0	0	0	0	0	0	0	0	0	0	0	0	0	0	1.38331	MASS_SPEC: Zasada_31445514
AHSG	0	0	0	0	0	0	0	0	0	0	1.38284	0	0	0	0	0	0	0	0	0	0	0	0	0	0	0	0	0	0	0	0	1.38284	MASS_SPEC: Zasada_31445514
SLC32A1	0	0	0	0	0	0	0	0	0	0	0	0	0	0	0	1.38261	0	0	0	0	0	0	0	0	0	0	0	0	0	0	0	1.38261	MICROARRAY: Gong_32412065
KLRG1	0	0	0	0	0	0	0	0	0	0	0	0	0	0	0	0	0	0	0	0	0	0	0	0	0	0	0	0	1.38186	0	0	1.38186	RNASEQ: Yuon_chou_37507442_deg_cord
HBA1	0	0	0	0	0	0	0	0	0	0	1.38098	0	0	0	0	0	0	0	0	0	0	0	0	0	0	0	0	0	0	0	0	1.38098	MASS_SPEC: Zasada_31445514
LINC01980	0	0	0	0	0	0	0	0	0	0	0	0	0	0	0	0	0	0	0	0	0	0	0	0	0	0	0	0	1.38032	0	0	1.38032	RNASEQ: Yuon_chou_37507442_deg_cord
ITIH4	0	0	0	0	0	0	0	0	0	0	1.38005	0	0	0	0	0	0	0	0	0	0	0	0	0	0	0	0	0	0	0	0	1.38005	MASS_SPEC: Zasada_31445514
LOC96610	0	0	0	0	0	0	0	0	0	0	0	0	0	0	0	1.37979	0	0	0	0	0	0	0	0	0	0	0	0	0	0	0	1.37979	MICROARRAY: Gong_32412065
F2RL1	0	0	0	0	0	0	0	0	0	0	0	0	0	0	0	1.37911	0	0	0	0	0	0	0	0	0	0	0	0	0	0	0	1.37911	MICROARRAY: Gong_32412065
CD163	0	0	0	0	0	0	0	0	0	0	0	0	0	0	0	0	0	0	0	0	0	0	0	0	0	0	0	0	1.37879	0	0	1.37879	RNASEQ: Yuon_chou_37507442_deg_cord
LYVE1	0	0	0	0	0	0	0	0	0	0	1.37865	0	0	0	0	0	0	0	0	0	0	0	0	0	0	0	0	0	0	0	0	1.37865	MASS_SPEC: Zasada_31445514
AKT2	0	0	0	0	0	0	0	0	0	0	0	0	0	0	0	1.37844	0	0	0	0	0	0	0	0	0	0	0	0	0	0	0	1.37844	MICROARRAY: Gong_32412065
AFM	0	0	0	0	0	0	0	0	0	0	1.37678	0	0	0	0	0	0	0	0	0	0	0	0	0	0	0	0	0	0	0	0	1.37678	MASS_SPEC: Zasada_31445514
A1BG	0	0	0	0	0	0	0	0	0	0	1.37632	0	0	0	0	0	0	0	0	0	0	0	0	0	0	0	0	0	0	0	0	1.37632	MASS_SPEC: Zasada_31445514
ORM2	0	0	0	0	0	0	0	0	0	0	1.37585	0	0	0	0	0	0	0	0	0	0	0	0	0	0	0	0	0	0	0	0	1.37585	MASS_SPEC: Zasada_31445514
TUBB3	0	0	0	0	0	0	0	0	0	0	0	0	0	0	0	1.37584	0	0	0	0	0	0	0	0	0	0	0	0	0	0	0	1.37584	MICROARRAY: Gong_32412065
PKMYT1	0	0	0	0	0	0	0	0	0	0	0	0	0	0	0	0	0	0	0	0	0	0	0	0	0	0	0	0	1.3758	0	0	1.3758	RNASEQ: Yuon_chou_37507442_deg_cord
LOC400958	0	0	0	0	0	0	0	0	0	0	0	0	0	0	0	1.3746	0	0	0	0	0	0	0	0	0	0	0	0	0	0	0	1.3746	MICROARRAY: Gong_32412065
FOSL1	0	0	0	0	0	0	0	0	0	0	0	0	0	0	0	0	0	0	0	0	0	0	0	0	0	0	0	0	1.37432	0	0	1.37432	RNASEQ: Yuon_chou_37507442_deg_cord
AREG	0	0	0	0	0	0	0	0	0	0	0	0	0	0	0	1.37399	0	0	0	0	0	0	0	0	0	0	0	0	0	0	0	1.37399	MICROARRAY: Gong_32412065
LOC100133299	0	0	0	0	0	0	0	0	0	0	0	0	0	0	0	1.37339	0	0	0	0	0	0	0	0	0	0	0	0	0	0	0	1.37339	MICROARRAY: Gong_32412065
N6AMT1	0	0	0	0	0	0	0	0	0	0	0	0	0	0	0	0	0	0	0	0	0	0	0	0	0	0	0	0	1.37286	0	0	1.37286	RNASEQ: Yuon_chou_37507442_deg_cord
BACE2	0	0	0	0	0	0	0	0	0	0	0	0	0	0	0	1.3728	0	0	0	0	0	0	0	0	0	0	0	0	0	0	0	1.3728	MICROARRAY: Gong_32412065
LOC100130458	0	0	0	0	0	0	0	0	0	0	0	0	0	0	0	1.37221	0	0	0	0	0	0	0	0	0	0	0	0	0	0	0	1.37221	MICROARRAY: Gong_32412065
TNFRSF13B	0	0	0	0	0	0	0	0	0	0	0	0	0	0	0	1.37164	0	0	0	0	0	0	0	0	0	0	0	0	0	0	0	1.37164	MICROARRAY: Gong_32412065
LOC284219	0	0	0	0	0	0	0	0	0	0	0	0	0	0	0	1.37107	0	0	0	0	0	0	0	0	0	0	0	0	0	0	0	1.37107	MICROARRAY: Gong_32412065
UBE2C	0	0	0	0	0	0	0	0	0	0	0	0	0	0	0	0	0	0	0	0	0	0	0	0	0	0	0	0	1.37	0	0	1.37	RNASEQ: Yuon_chou_37507442_deg_cord
RPS27	0	0	0	0	0	0	0	0	0	0	0	0	0	0	0	1.36996	0	0	0	0	0	0	0	0	0	0	0	0	0	0	0	1.36996	MICROARRAY: Gong_32412065
EIF1AY	0	0	0	0	0	0	0	0	0	0	0	0	0	0	1.31071	1.36942	0	0	0	0	0	0	0	0	0	0	0	0	0	0	0	1.36942	MICROARRAY: Gong_32412065
A2M-AS1	0	0	0	0	0	0	0	0	0	0	0	0	0	0	0	0	0	0	0	0	0	0	0	0	0	0	0	0	1.36859	0	0	1.36859	RNASEQ: Yuon_chou_37507442_deg_cord
CCDC187	0	0	0	0	0	0	0	0	0	0	0	0	0	0	0	1.36835	0	0	0	0	0	0	0	0	0	0	0	0	0	0	0	1.36835	MICROARRAY: Gong_32412065
PCDH9	0	0	0	0	0	0	0	0	0	0	0	0	0	0	0	1.36783	0	0	0	0	0	0	0	0	0	0	0	0	0	0	0	1.36783	MICROARRAY: Gong_32412065
DLD	0	0	0	0	0	0	0	0	0	0	0	0	0	0	0	0	0	0	0	0	0	0	0	0	0	0	0	0	1.36719	0	0	1.36719	RNASEQ: Yuon_chou_37507442_deg_cord
FAM177A1	0	0	0	0	0	0	0	0	0	0	0	0	0	0	0	0	0	0	0	0	0	0	0	0	0	0	0	0	1.36582	0	0	1.36582	RNASEQ: Yuon_chou_37507442_deg_cord
BMERB1	0	0	0	0	0	0	0	0	0	0	0	0	0	0	0	1.36533	0	0	0	0	0	0	0	0	0	0	0	0	0	0	0	1.36533	MICROARRAY: Gong_32412065
NIPAL4	0	0	0	0	0	0	0	0	0	0	0	0	0	0	0	1.36485	0	0	0	0	0	0	0	0	0	0	0	0	0	0	0	1.36485	MICROARRAY: Gong_32412065
TAF4	0	0	0	0	0	0	0	0	0	0	0	0	0	0	0	0	0	0	0	0	0	0	0	0	0	0	0	0	1.36445	0	0	1.36445	RNASEQ: Yuon_chou_37507442_deg_cord
BMP3	0	0	0	0	0	0	0	0	0	0	0	0	0	0	0	1.36438	0	0	0	0	0	0	0	0	0	0	0	0	0	0	0	1.36438	MICROARRAY: Gong_32412065
TXLNGY	0	0	0	0	0	0	0	0	0	0	0	0	0	0	0	1.36392	0	0	0	0	0	0	0	0	0	0	0	0	0	0	0	1.36392	MICROARRAY: Gong_32412065
MIR302E	0	0	0	0	0	0	0	0	0	0	0	0	0	0	0	0	0	0	0	0	0	0	0	0	0	0	0	1.3637	0	0	0	1.3637	RNASEQ: Yuon_chou_37507442_cpg_day28
PRICKLE1	0	0	0	0	0	0	0	0	0	0	0	0	0	0	1.31071	1.36346	0	0	0	0	0	0	0	0	0	0	0	0	0	0	0	1.36346	MICROARRAY: Gong_32412065
AGAP1	0	0	0	0	0	0	0	0	0	0	0	0	0	0	0	0	0	0	0	0	0	0	0	0	0	0	0	0	1.36311	0	0	1.36311	RNASEQ: Yuon_chou_37507442_deg_cord
PF4V1	0	0	0	0	0	0	0	0	0	0	0	0	0	0	0	1.363	0	0	0	0	0	0	0	0	0	0	0	0	0	0	0	1.363	MICROARRAY: Gong_32412065
TJP1	0	0	0	0	0	0	0	0	0	0	0	0	0	0	0	1.36212	0	0	0	0	0	0	0	0	0	0	0	0	0	0	0	1.36212	MICROARRAY: Gong_32412065
KRT17P8	0	0	0	0	0	0	0	0	0	0	0	0	0	0	0	0	0	0	0	0	0	0	0	0	0	0	0	0	1.36177	0	0	1.36177	RNASEQ: Yuon_chou_37507442_deg_cord
WDFY4	0	0	0	0	0	0	0	0	0	0	0	0	0	0	0	1.36168	0	0	0	0	0	0	0	0	0	0	0	0	0	0	0	1.36168	MICROARRAY: Gong_32412065
GVINP1	0	0	0	0	0	0	0	0	0	0	0	0	0	0	0	0	0	0	0	0	0	0	0	0	0	0	0	0	1.36046	0	0	1.36046	RNASEQ: Yuon_chou_37507442_deg_cord
MYBPC2	0	0	0	0	0	0	0	0	0	0	0	0	0	0	0	1.36042	0	0	0	0	0	0	0	0	0	0	0	0	0	0	0	1.36042	MICROARRAY: Gong_32412065
LOC105375613	0	0	0	0	0	0	0	0	0	0	0	0	0	0	0	0	0	0	0	0	0	0	0	0	0	0	1.16256	1.35993	0	0	0	1.35993	RNASEQ: Yuon_chou_37507442_cpg_day28
ENAH	0	0	0	0	0	0	0	0	0	0	0	0	0	0	0	1.35881	0	0	0	0	0	0	0	0	0	0	0	0	0	0	0	1.35881	MICROARRAY: Gong_32412065
IKZF4	0	0	0	0	0	0	0	0	0	0	0	0	0	0	0	1.35843	0	0	0	0	0	0	0	0	0	0	0	0	0	0	0	1.35843	MICROARRAY: Gong_32412065
WDR86-AS1	0	0	0	0	0	0	0	0	0	0	0	0	0	0	0	0	0	0	0	0	0	0	0	0	0	0	0	0	1.35787	1.30599	0	1.35787	RNASEQ: Yuon_chou_37507442_deg_cord
ID4	0	0	0	0	0	0	0	0	0	0	0	0	0	0	0	1.35693	0	0	0	0	0	1.29875	0	0	0	0	0	0	0	0	0	1.35693	MICROARRAY: Gong_32412065
ZNF438	0	0	0	0	0	0	0	0	0	0	0	0	0	0	0	0	0	0	0	0	0	0	0	0	0	0	1.14802	1.14486	1.35659	0	0	1.35659	RNASEQ: Yuon_chou_37507442_deg_cord
WNT16	0	0	0	0	0	0	0	0	0	0	0	0	0	0	0	1.35657	0	0	0	0	0	0	0	0	0	0	0	0	0	0	0	1.35657	MICROARRAY: Gong_32412065
LOC112268210	0	0	0	0	0	0	0	0	0	0	0	0	0	0	0	0	0	0	0	0	0	0	0	0	0	0	0	1.35623	0	0	0	1.35623	RNASEQ: Yuon_chou_37507442_cpg_day28
HLA-DRB5	0	0	0	0	0	0	0	0	0	0	0	0	0	0	0	1.35621	0	0	0	0	0	0	0	0	0	0	0	0	0	0	0	1.35621	MICROARRAY: Gong_32412065
PPP1R3B	0	0	0	0	0	0	0	0	0	0	0	0	0	0	0	1.35586	0	0	0	0	0	0	0	0	0	0	0	0	0	0	0	1.35586	MICROARRAY: Gong_32412065
PMEPA1	0	0	0	0	0	0	0	0	0	0	0	0	0	0	0	1.35552	0	0	0	0	0	0	0	0	0	0	0	0	0	0	0	1.35552	MICROARRAY: Gong_32412065
SLC46A3	0	0	0	0	0	0	0	0	0	0	0	0	0	0	0	0	0	0	0	0	0	0	0	0	0	0	0	0	1.35533	0	0	1.35533	RNASEQ: Yuon_chou_37507442_deg_cord
MOB3B	0	0	0	0	0	0	0	0	0	0	0	0	0	0	0	1.35517	0	0	0	0	0	0	0	0	0	0	0	0	0	0	0	1.35517	MICROARRAY: Gong_32412065
FA2H	0	0	0	0	0	0	0	0	0	0	0	0	0	0	0	1.35484	0	0	0	0	0	0	0	0	0	0	0	0	0	0	0	1.35484	MICROARRAY: Gong_32412065
CCDC50	0	0	0	0	0	0	0	0	0	0	0	0	0	0	0	1.35451	0	0	0	0	0	0	0	0	0	0	0	0	0	0	0	1.35451	MICROARRAY: Gong_32412065
ADAM19	0	0	0	0	0	0	0	0	0	0	0	0	0	0	0	1.35418	0	0	0	0	0	0	0	0	0	0	0	0	0	0	0	1.35418	MICROARRAY: Gong_32412065
CDCA8	0	0	0	0	0	0	0	0	0	0	0	0	0	0	0	0	0	0	0	0	0	0	0	0	0	0	0	0	1.35409	1.25015	0	1.35409	RNASEQ: Yuon_chou_37507442_deg_cord
CXXC5	0	0	0	0	0	0	0	0	0	0	0	0	0	0	0	1.35386	0	0	0	0	0	0	0	0	0	0	0	0	0	0	0	1.35386	MICROARRAY: Gong_32412065
PMAIP1	0	0	0	0	0	0	0	0	0	0	0	0	0	0	0	1.35354	0	0	0	0	0	0	0	0	0	0	0	0	0	0	0	1.35354	MICROARRAY: Gong_32412065
KCNJ2	0	0	0	0	0	0	0	0	0	0	0	0	0	0	0	1.35322	0	0	0	0	0	0	0	0	0	0	0	0	0	0	0	1.35322	MICROARRAY: Gong_32412065
BEND4	0	0	0	0	0	0	0	0	0	0	0	0	0	0	0	1.35292	0	0	0	0	0	0	0	0	0	0	0	0	0	0	0	1.35292	MICROARRAY: Gong_32412065
SCIRT	0	0	0	0	0	0	0	0	0	0	0	0	0	0	0	0	0	0	0	0	0	0	0	0	0	0	0	0	1.35286	0	0	1.35286	RNASEQ: Yuon_chou_37507442_deg_cord
PARP15	0	0	0	0	0	0	0	0	0	0	0	0	0	0	0	1.35261	0	0	0	0	0	0	0	0	0	0	0	0	0	0	0	1.35261	MICROARRAY: Gong_32412065
DEFB108B	0	0	0	0	0	0	0	0	0	0	0	0	0	0	0	1.35172	0	0	0	0	0	0	0	0	0	0	0	0	0	0	0	1.35172	MICROARRAY: Gong_32412065
IGLL1	0	0	0	0	0	0	0	0	0	0	0	0	0	0	0	1.35143	0	0	0	0	0	0	0	0	0	0	0	0	0	0	0	1.35143	MICROARRAY: Gong_32412065
SLC15A2	0	0	0	0	0	0	0	0	0	0	0	0	0	0	0	1.35115	0	0	0	0	0	0	0	0	0	0	0	0	0	0	0	1.35115	MICROARRAY: Gong_32412065
KLK1	0	0	0	0	0	0	0	0	0	0	0	0	0	0	0	1.35087	0	0	0	0	0	0	0	0	0	0	0	0	0	0	0	1.35087	MICROARRAY: Gong_32412065
LOC646976	0	0	0	0	0	0	0	0	0	0	0	0	0	0	0	1.35032	0	0	0	0	0	0	0	0	0	0	0	0	0	0	0	1.35032	MICROARRAY: Gong_32412065
SLC36A1	0	0	0	0	0	0	0	0	0	0	0	0	0	0	0	1.34979	0	0	0	0	0	0	0	0	0	0	0	0	0	0	0	1.34979	MICROARRAY: Gong_32412065
KDM5D	0	0	0	0	0	0	0	0	0	0	0	0	0	0	0	1.34953	0	0	0	0	0	0	0	0	0	0	0	0	0	0	0	1.34953	MICROARRAY: Gong_32412065
TCF4	0	0	0	0	0	0	0	0	0	0	0	0	0	0	0	1.34927	0	0	0	0	0	0	0	0	0	0	0	0	0	0	0	1.34927	MICROARRAY: Gong_32412065
EHD2	0	0	0	0	0	0	0	0	0	0	0	0	0	0	0	0	0	0	0	0	0	0	0	0	0	0	1.16353	1.34902	0	0	0	1.34902	RNASEQ: Yuon_chou_37507442_cpg_day28
LOC100653245	0	0	0	0	0	0	0	0	0	0	0	0	0	0	0	1.34902	0	0	0	0	0	0	0	0	0	0	0	0	0	0	0	1.34902	MICROARRAY: Gong_32412065
OPALIN	0	0	0	0	0	0	0	0	0	0	0	0	0	0	0	1.34877	0	0	0	0	0	0	0	0	0	0	0	0	0	0	0	1.34877	MICROARRAY: Gong_32412065
ESPNL	0	0	0	0	0	0	0	0	0	0	0	0	0	0	0	1.34852	0	0	0	0	0	0	0	0	0	0	0	0	0	0	0	1.34852	MICROARRAY: Gong_32412065
ENSG00000227218	0	0	0	0	0	0	0	0	0	0	0	0	0	0	0	0	0	0	0	0	0	0	0	0	0	0	0	0	1.34806	0	0	1.34806	RNASEQ: Yuon_chou_37507442_deg_cord
LOC100653060	0	0	0	0	0	0	0	0	0	0	0	0	0	0	0	1.3478	0	0	0	0	0	0	0	0	0	0	0	0	0	0	0	1.3478	MICROARRAY: Gong_32412065
VNN1	0	0	0	0	0	0	0	0	0	0	0	0	0	0	0	1.34757	0	0	0	0	0	0	0	0	0	0	0	0	0	0	0	1.34757	MICROARRAY: Gong_32412065
ERV18-1	0	0	0	0	0	0	0	0	0	0	0	0	0	0	0	1.34734	0	0	0	0	0	0	0	0	0	0	0	0	0	0	0	1.34734	MICROARRAY: Gong_32412065
GPR84	0	0	0	0	0	0	0	0	0	0	0	0	0	0	0	0	0	0	0	0	0	0	0	0	0	0	1.16893	0	1.3469	0	0	1.3469	RNASEQ: Yuon_chou_37507442_deg_cord
CRIP3	0	0	0	0	0	0	0	0	0	0	0	0	0	0	0	1.34689	0	0	0	0	0	0	0	0	0	0	0	0	0	0	0	1.34689	MICROARRAY: Gong_32412065
GGACT	0	0	0	0	0	0	0	0	0	0	0	0	0	0	0	1.34645	0	0	0	0	0	0	0	0	0	0	0	0	0	0	0	1.34645	MICROARRAY: Gong_32412065
HLA-DMA	0	0	0	0	0	0	0	0	0	0	0	0	0	0	0	1.34603	0	0	0	0	0	0	0	0	0	0	0	0	0	0	0	1.34603	MICROARRAY: Gong_32412065
HRK	0	0	0	0	0	0	0	0	0	0	0	0	0	0	0	1.34582	0	0	0	0	0	0	0	0	0	0	0	0	0	0	0	1.34582	MICROARRAY: Gong_32412065
B3GALNT1	0	0	0	0	0	0	0	0	0	0	0	0	0	0	0	0	0	0	0	0	0	0	0	0	0	0	0	0	1.34575	0	0	1.34575	RNASEQ: Yuon_chou_37507442_deg_cord
C12orf42	0	0	0	0	0	0	0	0	0	0	0	0	0	0	0	1.34561	0	0	0	0	0	0	0	0	0	0	0	0	0	0	0	1.34561	MICROARRAY: Gong_32412065
LOC101927881	0	0	0	0	0	0	0	0	0	0	0	0	0	0	0	0	0	0	0	0	0	0	0	0	0	0	1.1712	1.34551	0	0	0	1.34551	RNASEQ: Yuon_chou_37507442_cpg_day28
COL18A1	0	0	0	0	0	0	0	0	0	0	0	0	0	1.33314	0	1.34541	0	0	0	0	0	0	0	0	0	0	0	0	0	0	0	1.34541	MICROARRAY: Gong_32412065
DDX3Y	0	0	0	0	0	0	0	0	0	0	0	0	0	0	0	1.34521	0	0	0	0	0	0	0	0	0	0	0	0	0	0	0	1.34521	MICROARRAY: Gong_32412065
ANOS1	0	0	0	0	0	0	0	0	0	0	0	0	0	0	0	1.34501	0	0	0	0	0	0	0	0	0	0	0	0	0	0	0	1.34501	MICROARRAY: Gong_32412065
SENCR	0	0	0	0	0	0	0	0	0	0	0	0	0	0	0	0	0	0	0	0	0	0	0	0	0	0	0	0	1.34461	0	0	1.34461	RNASEQ: Yuon_chou_37507442_deg_cord
HSPB3	0	0	0	0	0	0	0	0	0	0	0	0	0	0	0	1.34444	0	0	0	0	0	1.29875	0	0	0	0	0	0	0	0	0	1.34444	MICROARRAY: Gong_32412065
COBLL1	0	0	0	0	0	0	0	0	0	0	0	0	0	0	0	1.34425	0	0	0	0	0	0	0	0	0	0	0	0	0	0	0	1.34425	MICROARRAY: Gong_32412065
FBXO10	0	0	0	0	0	0	0	0	0	0	0	0	0	0	0	1.34407	0	0	0	0	0	0	0	0	0	0	0	0	0	0	0	1.34407	MICROARRAY: Gong_32412065
TNFRSF13C	0	0	0	0	0	0	0	0	0	0	0	0	0	0	0	1.34389	0	0	0	0	0	0	0	0	0	0	0	0	0	0	0	1.34389	MICROARRAY: Gong_32412065
MGAT3	0	0	0	0	0	0	0	0	0	0	0	0	0	0	0	1.34371	0	0	0	0	0	0	0	0	0	0	0	0	0	0	0	1.34371	MICROARRAY: Gong_32412065
HLA-DOB	0	0	0	0	0	0	0	0	0	0	0	0	0	0	0	1.34354	0	0	0	0	0	0	0	0	0	0	0	0	0	0	0	1.34354	MICROARRAY: Gong_32412065
SUOX	0	0	0	0	0	0	0	0	0	0	0	0	0	0	0	0	0	0	0	0	0	0	0	0	0	0	0	0	1.34348	0	0	1.34348	RNASEQ: Yuon_chou_37507442_deg_cord
Sec1	0	0	0	0	0	0	0	0	0	0	0	0	0	0	0	1.34336	0	0	0	0	0	0	0	0	0	0	0	0	0	0	0	1.34336	MICROARRAY: Gong_32412065
LOC100131138	0	0	0	0	0	0	0	0	0	0	0	0	0	0	0	1.34302	0	0	0	0	0	0	0	0	0	0	0	0	0	0	0	1.34302	MICROARRAY: Gong_32412065
KIT	0	0	0	0	0	0	0	0	0	0	0	0	0	0	0	1.34286	0	0	0	0	0	0	0	0	0	0	0	0	0	0	0	1.34286	MICROARRAY: Gong_32412065
CDK14	0	0	0	0	0	0	0	0	0	0	0	0	0	0	0	1.34269	0	0	0	0	0	0	0	0	0	0	0	0	0	0	0	1.34269	MICROARRAY: Gong_32412065
ZNF367	0	0	0	0	0	0	0	0	0	0	0	0	0	0	0	1.34253	0	0	0	0	0	0	0	0	0	0	0	0	0	0	0	1.34253	MICROARRAY: Gong_32412065
HBZ	0	0	0	0	0	0	0	0	0	0	0	0	0	0	0	1.34237	0	0	0	0	0	0	0	0	0	0	0	0	0	0	0	1.34237	MICROARRAY: Gong_32412065
HSF5	0	0	0	0	0	0	0	0	0	0	0	0	0	0	0	0	0	0	0	0	0	0	0	0	0	0	0	0	1.34237	0	0	1.34237	RNASEQ: Yuon_chou_37507442_deg_cord
TNFSF8	0	0	0	0	0	0	0	0	0	0	0	0	0	0	0	0	0	0	0	0	0	0	0	0	0	0	1.16989	1.34206	1.31655	1.3067	0	1.34206	RNASEQ: Yuon_chou_37507442_cpg_day28
ELL3	0	0	0	0	0	0	0	0	0	0	0	0	0	0	0	1.34191	0	0	0	0	0	0	0	0	0	0	0	0	0	0	0	1.34191	MICROARRAY: Gong_32412065
TUBB6	0	0	0	0	0	0	0	0	0	0	0	0	0	0	0	1.34176	0	0	0	0	0	0	0	0	0	0	0	0	0	0	0	1.34176	MICROARRAY: Gong_32412065
MXRA7	0	0	0	0	0	0	0	0	0	0	0	0	0	0	0	1.34161	0	0	0	0	0	0	0	0	0	0	0	0	0	0	0	1.34161	MICROARRAY: Gong_32412065
TPD52	0	0	0	0	0	0	0	0	0	0	0	0	0	0	0	1.34146	0	0	0	0	0	0	0	0	0	0	0	0	0	0	0	1.34146	MICROARRAY: Gong_32412065
EPHB4	0	0	0	0	0	0	0	0	0	0	0	0	0	0	0	1.34132	0	0	0	0	0	0	0	0	0	0	0	0	0	0	0	1.34132	MICROARRAY: Gong_32412065
CELA1	0	0	0	0	0	0	0	0	0	0	0	0	0	0	0	1.34118	0	0	0	0	0	0	0	0	0	0	0	0	0	0	0	1.34118	MICROARRAY: Gong_32412065
LOC283454	0	0	0	0	0	0	0	0	0	0	0	0	0	0	0	1.3409	0	0	0	0	0	0	0	0	0	0	0	0	0	0	0	1.3409	MICROARRAY: Gong_32412065
MYZAP	0	0	0	0	0	0	0	0	0	0	0	0	0	0	0	1.34063	0	0	0	0	0	0	0	0	0	0	0	0	0	0	0	1.34063	MICROARRAY: Gong_32412065
HLA-DPA1	0	0	0	0	0	0	0	0	0	0	0	0	0	0	0	1.3405	0	0	0	0	0	0	0	0	0	0	0	0	0	0	0	1.3405	MICROARRAY: Gong_32412065
DNAJB7	0	0	0	0	0	0	0	0	0	0	0	0	0	0	0	1.34036	0	0	0	0	0	0	0	0	0	0	0	0	0	0	0	1.34036	MICROARRAY: Gong_32412065
OLR1	0	0	0	0	0	0	0	0	0	0	0	0	0	0	0	0	0	0	0	0	0	0	0	0	0	0	0	0	1.34018	0	0	1.34018	RNASEQ: Yuon_chou_37507442_deg_cord
LOC100506342	0	0	0	0	0	0	0	0	0	0	0	0	0	0	0	1.34011	0	0	0	0	0	0	0	0	0	0	0	0	0	0	0	1.34011	MICROARRAY: Gong_32412065
MTCL1	0	0	0	0	0	0	0	0	0	0	0	0	0	0	0	1.33998	0	0	0	0	0	0	0	0	0	0	0	0	0	0	0	1.33998	MICROARRAY: Gong_32412065
MICAL3	0	0	0	0	0	0	0	0	0	0	0	0	0	0	0	1.33986	0	0	0	0	0	0	0	0	0	0	0	0	0	0	0	1.33986	MICROARRAY: Gong_32412065
DBNL	0	0	0	0	0	0	0	0	0	0	0	0	0	0	0	1.33974	0	0	0	0	0	0	0	0	0	0	0	0	0	0	0	1.33974	MICROARRAY: Gong_32412065
FAM81A	0	0	0	0	0	0	0	0	0	0	0	0	0	0	0	1.33962	0	0	0	0	0	0	0	0	0	0	0	0	0	0	0	1.33962	MICROARRAY: Gong_32412065
TMPRSS9	0	0	0	0	0	0	0	0	0	0	0	0	0	0	0	1.33938	0	0	0	0	0	0	0	0	0	0	0	0	0	0	0	1.33938	MICROARRAY: Gong_32412065
C16orf74	0	0	0	0	0	0	0	0	0	0	0	0	0	0	0	1.33927	0	0	0	0	0	0	0	0	0	0	0	0	0	0	0	1.33927	MICROARRAY: Gong_32412065
KLF8	0	0	0	0	0	0	0	0	0	0	0	0	0	0	0	1.33916	0	0	0	0	0	0	0	0	0	0	0	0	0	0	0	1.33916	MICROARRAY: Gong_32412065
NCS1	0	0	0	0	0	0	0	0	0	0	0	0	0	0	0	0	0	0	0	0	0	0	0	0	0	0	1.15867	0	1.3391	0	0	1.3391	RNASEQ: Yuon_chou_37507442_deg_cord
CUX2	0	0	0	0	0	0	0	0	0	0	0	0	0	0	0	1.33893	0	0	0	0	0	0	0	0	0	0	0	0	0	0	0	1.33893	MICROARRAY: Gong_32412065
TMEM45A	0	0	0	0	0	0	0	0	0	0	0	0	0	0	0	1.33882	0	0	0	0	0	0	0	0	0	0	0	0	0	0	0	1.33882	MICROARRAY: Gong_32412065
XRRA1	0	0	0	0	0	0	0	0	0	0	0	0	0	0	0	1.3384	0	0	0	0	0	0	0	0	0	0	0	0	0	0	0	1.3384	MICROARRAY: Gong_32412065
CKM	0	0	0	0	0	0	0	0	0	0	0	0	0	0	0	1.3383	0	0	0	0	0	0	0	0	0	0	0	0	0	0	0	1.3383	MICROARRAY: Gong_32412065
CNR1	0	0	0	0	0	0	0	0	0	0	0	0	0	0	0	1.3382	0	0	0	0	0	0	0	0	0	0	0	0	0	0	0	1.3382	MICROARRAY: Gong_32412065
USP9Y	0	0	0	0	0	0	0	0	0	0	0	0	0	0	0	1.3381	0	0	0	0	0	0	0	0	0	0	0	0	0	0	0	1.3381	MICROARRAY: Gong_32412065
CSDC2	0	0	0	0	0	0	0	0	0	0	0	0	0	0	0	0	0	0	0	0	0	0	0	0	0	0	0	0	1.33804	0	0	1.33804	RNASEQ: Yuon_chou_37507442_deg_cord
FAM183A	0	0	0	0	0	0	0	0	0	0	0	0	0	0	0	1.33801	0	0	0	0	0	0	0	0	0	0	0	0	0	0	0	1.33801	MICROARRAY: Gong_32412065
NPTX1	0	0	0	0	0	0	0	0	0	0	0	0	0	0	0	1.33763	0	0	0	0	0	0	0	0	0	0	0	0	0	0	0	1.33763	MICROARRAY: Gong_32412065
FAM89A	0	0	0	0	0	0	0	0	0	0	0	0	0	0	0	1.33754	0	0	0	0	0	0	0	0	0	0	0	0	0	0	0	1.33754	MICROARRAY: Gong_32412065
PTPN13	0	0	0	0	0	0	0	0	0	0	0	0	0	0	0	1.33745	0	0	0	0	0	0	0	0	0	0	0	0	0	0	0	1.33745	MICROARRAY: Gong_32412065
OCLN	0	0	0	0	0	0	0	0	0	0	0	0	0	0	0	1.33728	0	0	0	0	0	0	0	0	0	0	0	0	0	0	0	1.33728	MICROARRAY: Gong_32412065
FAM27E3	0	0	0	0	0	0	0	0	0	0	0	0	0	0	0	1.33719	0	0	0	0	0	0	0	0	0	0	0	0	0	0	0	1.33719	MICROARRAY: Gong_32412065
CCDC74B	0	0	0	0	0	0	0	0	0	0	0	0	0	0	0	1.33703	0	0	0	0	0	0	0	0	0	0	0	0	0	0	0	1.33703	MICROARRAY: Gong_32412065
HNRNPM	0	0	0	0	0	0	0	0	0	0	0	0	0	0	0	0	0	0	0	0	0	0	0	0	0	0	0	0	1.33698	0	0	1.33698	RNASEQ: Yuon_chou_37507442_deg_cord
PPIL6	0	0	0	0	0	0	0	0	0	0	0	0	0	0	0	1.33694	0	0	0	0	0	0	0	0	0	0	0	0	0	0	0	1.33694	MICROARRAY: Gong_32412065
PGA3	0	0	0	0	0	0	0	0	0	0	0	0	0	0	0	1.33686	0	0	0	0	0	0	0	0	0	0	0	0	0	0	0	1.33686	MICROARRAY: Gong_32412065
SLC23A1	0	0	0	0	0	0	0	0	0	0	0	0	0	0	0	1.33678	0	0	0	0	0	0	0	0	0	0	0	0	0	0	0	1.33678	MICROARRAY: Gong_32412065
H3-3B	0	0	0	0	0	0	0	0	0	0	0	0	0	0	0	1.3367	0	0	0	0	0	0	0	0	0	0	0	0	0	0	0	1.3367	MICROARRAY: Gong_32412065
LINC00328	0	0	0	0	0	0	0	0	0	0	0	0	0	0	0	1.33663	0	0	0	0	0	0	0	0	0	0	0	0	0	0	0	1.33663	MICROARRAY: Gong_32412065
KLF6	0	0	0	0	0	0	0	0	0	0	0	0	0	0	0	1.33655	0	0	0	0	0	0	0	0	0	0	0	0	0	0	0	1.33655	MICROARRAY: Gong_32412065
PLXNA4	0	0	0	0	0	0	0	0	0	0	0	0	0	0	0	1.33647	0	0	0	0	0	0	0	0	0	0	0	0	0	0	0	1.33647	MICROARRAY: Gong_32412065
FCGBP	0	0	0	0	0	0	0	0	0	0	0	0	0	0	0	1.3364	0	0	0	0	0	0	0	0	0	0	0	0	0	0	0	1.3364	MICROARRAY: Gong_32412065
EIF2A	0	0	0	0	0	0	0	0	0	0	0	0	0	0	0	1.33633	0	0	0	0	0	0	0	0	0	0	0	0	0	0	0	1.33633	MICROARRAY: Gong_32412065
SLC25A21	0	0	0	0	0	0	0	0	0	0	0	0	0	0	0	1.33618	0	0	0	0	0	0	0	0	0	0	0	0	0	0	0	1.33618	MICROARRAY: Gong_32412065
FAM30A	0	0	0	0	0	0	0	0	0	0	0	0	0	0	0	1.33611	0	0	0	0	0	0	0	0	0	0	0	0	0	0	0	1.33611	MICROARRAY: Gong_32412065
HIP1R	0	0	0	0	0	0	0	0	0	0	0	0	0	0	0	1.33604	0	0	0	0	0	0	0	0	0	0	0	0	0	0	0	1.33604	MICROARRAY: Gong_32412065
TTTY15	0	0	0	0	0	0	0	0	0	0	0	0	0	0	0	1.33598	0	0	0	0	0	0	0	0	0	0	0	0	0	0	0	1.33598	MICROARRAY: Gong_32412065
TMEM133	0	0	0	0	0	0	0	0	0	0	0	0	0	0	0	1.33591	0	0	0	0	0	0	0	0	0	0	0	0	0	0	0	1.33591	MICROARRAY: Gong_32412065
MS4A4A	0	0	0	0	0	0	0	0	0	0	0	0	0	0	0	1.33584	0	0	0	0	0	0	0	0	0	0	0	0	0	0	0	1.33584	MICROARRAY: Gong_32412065
DIRAS1	0	0	0	0	0	0	0	0	0	0	0	0	0	0	0	1.33578	0	0	0	0	0	0	0	0	0	0	0	0	0	0	0	1.33578	MICROARRAY: Gong_32412065
DOK7	0	0	0	0	0	0	0	0	0	0	0	0	0	0	0	1.33565	0	0	0	0	0	0	0	0	0	0	0	0	0	0	0	1.33565	MICROARRAY: Gong_32412065
ANGPTL1	0	0	0	0	0	0	0	0	0	0	0	0	0	0	0	1.33559	0	0	0	0	0	0	0	0	0	0	0	0	0	0	0	1.33559	MICROARRAY: Gong_32412065
RPS4Y2	0	0	0	0	0	0	0	0	0	0	0	0	0	0	1.31071	1.33552	0	0	0	0	0	0	0	0	0	0	0	0	0	0	0	1.33552	MICROARRAY: Gong_32412065
UTY	0	0	0	0	0	0	0	0	0	0	0	0	0	0	0	1.3354	0	0	0	0	0	0	0	0	0	0	0	0	0	0	0	1.3354	MICROARRAY: Gong_32412065
LOC107985910	0	0	0	0	0	0	0	0	0	0	0	0	0	0	0	0	0	0	0	0	0	0	0	0	0	0	1.17213	1.33535	0	0	0	1.33535	RNASEQ: Yuon_chou_37507442_cpg_day28
ZFY	0	0	0	0	0	0	0	0	0	0	0	0	0	0	1.31071	1.33529	0	0	0	0	0	0	0	0	0	0	0	0	0	0	0	1.33529	MICROARRAY: Gong_32412065
WASF3	0	0	0	0	0	0	0	0	0	0	0	0	0	0	0	1.33517	0	0	0	0	0	0	0	0	0	0	0	0	0	0	0	1.33517	MICROARRAY: Gong_32412065
CISH	0	0	0	0	0	0	0	0	0	0	0	0	0	0	0	1.33506	0	0	0	0	0	0	0	0	0	0	0	0	0	0	0	1.33506	MICROARRAY: Gong_32412065
AIF1L	0	0	0	0	0	0	0	0	0	0	0	0	0	0	0	1.33495	0	0	0	0	0	0	0	0	0	0	0	0	0	0	0	1.33495	MICROARRAY: Gong_32412065
SH3RF1	0	0	0	0	0	0	0	0	0	0	0	0	0	0	0	0	0	0	0	0	0	0	0	0	0	0	0	0	1.33491	0	0	1.33491	RNASEQ: Yuon_chou_37507442_deg_cord
LOC100130642	0	0	0	0	0	0	0	0	0	0	0	0	0	0	0	1.3349	0	0	0	0	0	0	0	0	0	0	0	0	0	0	0	1.3349	MICROARRAY: Gong_32412065
VIL1	0	0	0	0	0	0	0	0	0	0	0	0	0	0	0	1.33485	0	0	0	0	0	0	0	0	0	0	0	0	0	0	0	1.33485	MICROARRAY: Gong_32412065
CCL23	0	0	0	0	0	0	0	0	0	0	0	0	0	0	0	1.33469	0	0	0	0	0	0	0	0	0	0	0	0	0	0	0	1.33469	MICROARRAY: Gong_32412065
PLXNB3	0	0	0	0	0	0	0	0	0	0	0	0	0	0	0	1.33465	0	0	0	0	0	0	0	0	0	0	0	0	0	0	0	1.33465	MICROARRAY: Gong_32412065
CBS	0	0	0	0	0	0	0	0	0	0	0	0	0	0	0	1.3346	0	0	0	0	0	0	0	0	0	0	0	0	0	0	0	1.3346	MICROARRAY: Gong_32412065
RPS4Y1	0	0	0	0	0	0	0	0	0	0	0	0	0	0	1.31071	1.33455	0	0	0	0	0	0	0	0	0	0	0	0	0	0	0	1.33455	MICROARRAY: Gong_32412065
SEC14L3	0	0	0	0	0	0	0	0	0	0	0	0	0	0	0	1.3345	0	0	0	0	0	0	0	0	0	0	0	0	0	0	0	1.3345	MICROARRAY: Gong_32412065
TTC21A	0	0	0	0	0	0	0	0	0	0	0	0	0	0	0	1.33446	0	0	0	0	0	0	0	0	0	0	0	0	0	0	0	1.33446	MICROARRAY: Gong_32412065
FKBP9	0	0	0	0	0	0	0	0	0	0	0	0	0	0	0	1.33441	0	0	0	0	0	0	0	0	0	0	0	0	0	0	0	1.33441	MICROARRAY: Gong_32412065
KCNQ5	0	0	0	0	0	0	0	0	0	0	0	0	0	0	0	1.33436	0	0	0	0	0	0	0	0	0	0	0	0	0	0	0	1.33436	MICROARRAY: Gong_32412065
APOBEC2	0	0	0	0	0	0	0	0	0	0	0	0	0	0	0	1.33432	0	0	0	0	0	0	0	0	0	0	0	0	0	0	0	1.33432	MICROARRAY: Gong_32412065
MAB21L2	0	0	0	0	0	0	0	0	0	0	0	0	0	0	0	1.33423	0	0	0	0	0	0	0	0	0	0	0	0	0	0	0	1.33423	MICROARRAY: Gong_32412065
E2F1	0	0	0	0	0	0	0	0	0	0	0	0	0	0	0	1.33406	0	0	0	0	0	0	0	0	0	0	0	0	0	0	0	1.33406	MICROARRAY: Gong_32412065
DDX43	0	0	0	0	0	0	0	0	0	0	0	0	0	0	0	1.33402	0	0	0	0	0	0	0	0	0	0	0	0	0	0	0	1.33402	MICROARRAY: Gong_32412065
PIP5K1B	0	0	0	0	0	0	0	0	0	0	0	0	0	0	0	1.33394	0	0	0	0	0	0	0	0	0	0	0	0	0	0	0	1.33394	MICROARRAY: Gong_32412065
PWRN1	0	0	0	0	0	0	0	0	0	0	0	0	0	0	0	1.33391	0	0	0	0	0	0	0	0	0	0	0	0	0	0	0	1.33391	MICROARRAY: Gong_32412065
PNLDC1	0	0	0	0	0	0	0	0	0	0	0	0	0	0	0	0	0	0	0	0	0	0	0	0	0	0	1.15884	0	1.33389	0	0	1.33389	RNASEQ: Yuon_chou_37507442_deg_cord
LOC100129408	0	0	0	0	0	0	0	0	0	0	0	0	0	0	0	1.33383	0	0	0	0	0	0	0	0	0	0	0	0	0	0	0	1.33383	MICROARRAY: Gong_32412065
ARG2	0	0	0	0	0	0	0	0	0	0	0	0	0	0	0	1.33379	0	0	0	0	0	0	0	0	0	0	0	0	0	0	0	1.33379	MICROARRAY: Gong_32412065
CEP112	0	0	0	0	0	0	0	0	0	0	0	0	0	0	0	1.33376	0	0	0	0	0	0	0	0	0	0	0	0	0	0	0	1.33376	MICROARRAY: Gong_32412065
CD74	0	0	0	0	0	0	0	0	0	0	0	0	0	0	0	1.33368	0	0	0	0	0	0	0	0	0	0	0	0	0	0	0	1.33368	MICROARRAY: Gong_32412065
SLCO2B1	0	0	0	0	0	0	0	0	0	0	0	0	0	0	0	1.33365	0	0	0	0	0	0	0	0	0	0	0	0	0	0	0	1.33365	MICROARRAY: Gong_32412065
GATM	0	0	0	0	0	0	0	0	0	0	0	0	0	0	0	1.33361	0	0	0	0	0	0	0	0	0	0	0	0	0	0	0	1.33361	MICROARRAY: Gong_32412065
LCN10	0	0	0	0	0	0	0	0	0	0	0	0	0	0	0	1.33358	0	0	0	0	0	0	0	0	0	0	0	0	0	0	0	1.33358	MICROARRAY: Gong_32412065
ILF2	0	0	0	0	0	0	0	0	0	0	0	0	0	0	0	1.33355	0	0	0	0	0	0	0	0	0	0	0	0	0	0	0	1.33355	MICROARRAY: Gong_32412065
GRAPL	0	0	0	0	0	0	0	0	0	0	0	0	0	0	0	1.33351	0	0	0	0	0	0	0	0	0	0	0	0	0	0	0	1.33351	MICROARRAY: Gong_32412065
SLC39A8	0	0	0	0	0	0	0	0	0	0	0	0	0	0	0	1.33342	0	0	0	0	0	1.29875	0	0	0	0	0	0	0	0	0	1.33342	MICROARRAY: Gong_32412065
PHACTR1	0	0	0	0	0	0	0	0	0	0	0	0	0	0	0	1.33338	0	0	0	0	0	0	0	0	0	0	0	0	0	0	0	1.33338	MICROARRAY: Gong_32412065
PEX6	0	0	0	0	0	0	0	0	0	0	0	0	0	0	0	1.33335	0	0	0	0	0	0	0	0	0	0	0	0	0	0	0	1.33335	MICROARRAY: Gong_32412065
LOC728084	0	0	0	0	0	0	0	0	0	0	0	0	0	0	0	1.33326	0	0	0	0	0	0	0	0	0	0	0	0	0	0	0	1.33326	MICROARRAY: Gong_32412065
BEX3	0	0	0	0	0	0	0	0	0	0	0	0	0	0	0	1.33323	0	0	0	0	0	0	0	0	0	0	0	0	0	0	0	1.33323	MICROARRAY: Gong_32412065
TMED6	0	0	0	0	0	0	0	0	0	0	0	0	0	0	0	1.33318	0	0	0	0	0	0	0	0	0	0	0	0	0	0	0	1.33318	MICROARRAY: Gong_32412065
CD37	0	0	0	0	0	0	0	0	0	0	0	0	0	0	0	1.33315	0	0	0	0	0	0	0	0	0	0	0	0	0	0	0	1.33315	MICROARRAY: Gong_32412065
THBS1	0	0	0	0	0	0	0	0	0	0	0	0	0	1.33314	0	0	0	0	1.20585	0	0	0	0	0	0	0	0	0	0	0	0	1.33314	MICROARRAY: Da_paepe_20718599
TEK	0	0	0	0	0	0	0	0	0	0	0	0	0	1.33314	1.31071	0	0	0	0	0	0	0	0	0	0	0	0	0	0	0	0	1.33314	MICROARRAY: Da_paepe_20718599
ENG	0	0	0	0	0	0	0	0	0	0	0	0	0	1.33314	0	0	0	0	0	0	0	0	0	0	0	0	0	0	0	0	0	1.33314	MICROARRAY: Da_paepe_20718599
CCL2	0	0	0	0	0	0	0	0	0	0	0	0	0	1.33314	0	0	0	0	0	0	0	0	0	0	0	0	0	0	0	0	0	1.33314	MICROARRAY: Da_paepe_20718599
TIMP1	0	0	0	0	0	0	0	0	0	0	0	0	0	1.33314	0	0	0	0	0	0	0	0	0	0	0	0	0	0	0	0	0	1.33314	MICROARRAY: Da_paepe_20718599
EFNA-1	0	0	0	0	0	0	0	0	0	0	0	0	0	1.33314	0	0	0	0	0	0	0	0	0	0	0	0	0	0	0	0	0	1.33314	MICROARRAY: Da_paepe_20718599
VEGFB	0	0	0	0	0	0	0	0	0	0	0	0	0	1.33314	0	0	0	0	0	0	0	0	0	0	0	0	0	0	0	0	0	1.33314	MICROARRAY: Da_paepe_20718599
MDK	0	0	0	0	0	0	0	0	0	0	0	0	0	1.33314	0	0	0	0	0	0	0	0	0	0	0	0	0	0	0	0	0	1.33314	MICROARRAY: Da_paepe_20718599
ANG	0	0	0	0	0	0	0	0	0	0	0	0	0	1.33314	0	0	0	0	0	0	0	0	0	0	0	0	0	0	0	0	0	1.33314	MICROARRAY: Da_paepe_20718599
EAF2	0	0	0	0	0	0	0	0	0	0	0	0	0	0	0	1.33309	0	0	0	0	0	0	0	0	0	0	0	0	0	0	0	1.33309	MICROARRAY: Gong_32412065
SETBP1	0	0	0	0	0	0	0	0	0	0	0	0	0	0	0	1.33304	0	0	0	0	0	0	0	0	0	0	0	0	0	0	0	1.33304	MICROARRAY: Gong_32412065
NTSR1	0	0	0	0	0	0	0	0	0	0	0	0	0	0	0	1.33299	0	0	0	0	0	0	0	0	0	0	0	0	0	0	0	1.33299	MICROARRAY: Gong_32412065
LOC254099	0	0	0	0	0	0	0	0	0	0	0	0	0	0	0	1.33294	0	0	0	0	0	0	0	0	0	0	0	0	0	0	0	1.33294	MICROARRAY: Gong_32412065
C11orf80	0	0	0	0	0	0	0	0	0	0	0	0	0	0	0	1.33291	0	0	0	0	0	0	0	0	0	0	0	0	0	0	0	1.33291	MICROARRAY: Gong_32412065
FAM224A	0	0	0	0	0	0	0	0	0	0	0	0	0	0	0	1.33289	0	0	0	0	0	0	0	0	0	0	0	0	0	0	0	1.33289	MICROARRAY: Gong_32412065
CTIF	0	0	0	0	0	0	0	0	0	0	0	0	0	0	0	0	0	0	0	0	0	0	0	0	0	0	0	0	1.33289	0	0	1.33289	RNASEQ: Yuon_chou_37507442_deg_cord
CXCR2	0	0	0	0	0	0	0	0	0	0	0	0	0	0	0	1.33287	0	0	0	0	0	0	0	0	0	0	0	0	0	0	0	1.33287	MICROARRAY: Gong_32412065
KDM6A	0	0	0	0	0	0	0	0	0	0	0	0	0	0	0	1.33282	0	0	0	0	0	0	0	0	0	0	0	0	0	0	0	1.33282	MICROARRAY: Gong_32412065
RIPK4	0	0	0	0	0	0	0	0	0	0	0	0	0	0	0	1.3328	0	0	0	0	0	0	0	0	0	0	0	0	0	0	0	1.3328	MICROARRAY: Gong_32412065
ADM	0	0	0	0	0	0	0	0	0	0	0	0	0	0	0	1.33277	0	0	0	0	0	0	0	0	0	0	0	0	0	0	0	1.33277	MICROARRAY: Gong_32412065
TMEM45B	0	0	0	0	0	0	0	0	0	0	0	0	0	0	0	1.33275	0	0	0	0	0	0	0	0	0	0	0	0	0	0	0	1.33275	MICROARRAY: Gong_32412065
IKZF3	0	0	0	0	0	0	0	0	0	0	0	0	0	0	0	1.33273	0	0	0	0	0	0	0	0	0	0	0	0	0	0	0	1.33273	MICROARRAY: Gong_32412065
DPY19L2P3	0	0	0	0	0	0	0	0	0	0	0	0	0	0	0	1.33268	0	0	0	0	0	0	0	0	0	0	0	0	0	0	0	1.33268	MICROARRAY: Gong_32412065
PCYT1B	0	0	0	0	0	0	0	0	0	0	0	0	0	0	0	1.33266	0	0	0	0	0	0	0	0	0	0	0	0	0	0	0	1.33266	MICROARRAY: Gong_32412065
PRG2	0	0	0	0	0	0	0	0	0	0	0	0	0	0	0	1.33264	0	0	0	0	0	0	0	0	0	0	0	0	0	0	0	1.33264	MICROARRAY: Gong_32412065
SPATA31D1	0	0	0	0	0	0	0	0	0	0	0	0	0	0	0	1.33262	0	0	0	0	0	0	0	0	0	0	0	0	0	0	0	1.33262	MICROARRAY: Gong_32412065
LINC01000	0	0	0	0	0	0	0	0	0	0	0	0	0	0	0	1.33258	0	0	0	0	0	0	0	0	0	0	0	0	0	0	0	1.33258	MICROARRAY: Gong_32412065
CEP126	0	0	0	0	0	0	0	0	0	0	0	0	0	0	0	1.33256	0	0	0	0	0	0	0	0	0	0	0	0	0	0	0	1.33256	MICROARRAY: Gong_32412065
LOC286087	0	0	0	0	0	0	0	0	0	0	0	0	0	0	0	1.33254	0	0	0	0	0	0	0	0	0	0	0	0	0	0	0	1.33254	MICROARRAY: Gong_32412065
TSPAN16	0	0	0	0	0	0	0	0	0	0	0	0	0	0	0	1.33252	0	0	0	0	0	0	0	0	0	0	0	0	0	0	0	1.33252	MICROARRAY: Gong_32412065
NBPF22P	0	0	0	0	0	0	0	0	0	0	0	0	0	0	0	1.33249	0	0	0	0	0	0	0	0	0	0	0	0	0	0	0	1.33249	MICROARRAY: Gong_32412065
DNAH12	0	0	0	0	0	0	0	0	0	0	0	0	0	0	0	1.33247	0	0	0	0	0	0	0	0	0	0	0	0	0	0	0	1.33247	MICROARRAY: Gong_32412065
DNAH17	0	0	0	0	0	0	0	0	0	0	0	0	0	0	0	1.33243	0	0	0	0	0	0	0	0	0	0	0	0	0	0	0	1.33243	MICROARRAY: Gong_32412065
LOC100131043	0	0	0	0	0	0	0	0	0	0	0	0	0	0	0	1.33241	0	0	0	0	0	0	0	0	0	0	0	0	0	0	0	1.33241	MICROARRAY: Gong_32412065
PROK2	0	0	0	0	0	0	0	0	0	0	0	0	0	0	0	1.3324	0	0	0	0	0	0	0	0	0	0	0	0	0	0	0	1.3324	MICROARRAY: Gong_32412065
OR52N4	0	0	0	0	0	0	0	0	0	0	0	0	0	0	0	1.33236	0	0	0	0	0	0	0	0	0	0	0	0	0	0	0	1.33236	MICROARRAY: Gong_32412065
PRKAR1B	0	0	0	0	0	0	0	0	0	0	0	0	0	0	0	1.3323	0	0	0	0	0	0	0	0	0	0	0	0	0	0	0	1.3323	MICROARRAY: Gong_32412065
SCGB1C1	0	0	0	0	0	0	0	0	0	0	0	0	0	0	0	1.33225	0	0	0	0	0	0	0	0	0	0	0	0	0	0	0	1.33225	MICROARRAY: Gong_32412065
CST7	0	0	0	0	0	0	0	0	0	0	0	0	0	0	0	1.33224	0	0	0	0	0	0	0	0	0	0	0	0	0	0	0	1.33224	MICROARRAY: Gong_32412065
SLCO4C1	0	0	0	0	0	0	0	0	0	0	0	0	0	0	0	1.33222	0	0	0	0	0	0	0	0	0	0	0	0	0	0	0	1.33222	MICROARRAY: Gong_32412065
LOC107986562	0	0	0	0	0	0	0	0	0	0	0	0	0	0	0	0	0	0	0	0	0	0	0	0	0	0	0	1.33207	0	0	0	1.33207	RNASEQ: Yuon_chou_37507442_cpg_day28
FAM114A1	0	0	0	0	0	0	0	0	0	0	0	0	0	0	0	0	0	0	0	0	0	0	0	0	0	0	0	0	1.33189	0	0	1.33189	RNASEQ: Yuon_chou_37507442_deg_cord
YBX1P2	0	0	0	0	0	0	0	0	0	0	0	0	0	0	0	0	0	0	0	0	0	0	0	0	0	0	0	0	1.32993	0	0	1.32993	RNASEQ: Yuon_chou_37507442_deg_cord
ERFE	0	0	0	0	0	0	0	0	0	0	0	0	0	0	0	0	0	0	0	0	0	0	0	0	0	0	1.16777	0	1.32897	0	0	1.32897	RNASEQ: Yuon_chou_37507442_deg_cord
LINC02051	0	0	0	0	0	0	0	0	0	0	0	0	0	0	0	0	0	0	0	0	0	0	0	0	0	0	1.17014	1.32886	0	0	0	1.32886	RNASEQ: Yuon_chou_37507442_cpg_day28
CCDC62	0	0	0	0	0	0	0	0	0	0	0	0	0	0	0	0	0	0	0	0	0	0	0	0	0	0	0	0	1.32802	0	0	1.32802	RNASEQ: Yuon_chou_37507442_deg_cord
P2RY2	0	0	0	0	0	0	0	0	0	0	0	0	0	0	0	0	0	0	0	0	0	0	0	0	0	0	0	0	1.32707	0	0	1.32707	RNASEQ: Yuon_chou_37507442_deg_cord
LINC01287	0	0	0	0	0	0	0	0	0	0	0	0	0	0	0	0	0	0	0	0	0	0	0	0	0	0	0	1.3257	0	0	0	1.3257	RNASEQ: Yuon_chou_37507442_cpg_day28
KLRC1	0	0	0	0	0	0	0	0	0	0	0	0	0	0	0	0	0	0	0	0	0	0	0	0	0	0	0	0	1.32522	0	0	1.32522	RNASEQ: Yuon_chou_37507442_deg_cord
DENND2B	0	0	0	0	0	0	0	0	0	0	0	0	0	0	0	0	0	0	0	0	0	0	0	0	0	0	0	1.3226	0	0	0	1.3226	RNASEQ: Yuon_chou_37507442_cpg_day28
TYSND1	0	0	0	0	0	0	0	0	0	0	0	0	0	0	0	0	0	0	0	0	0	0	0	0	0	0	0	0	1.32252	0	0	1.32252	RNASEQ: Yuon_chou_37507442_deg_cord
AL360178.1	0	0	0	0	0	0	0	0	0	0	0	0	0	0	0	0	0	0	0	0	0	0	0	0	0	0	0	0	1.32164	0	0	1.32164	RNASEQ: Yuon_chou_37507442_deg_cord
E2F8	0	0	0	0	0	0	0	0	0	0	0	0	0	0	0	0	0	0	0	0	0	0	0	0	0	0	0	0	1.32077	0	0	1.32077	RNASEQ: Yuon_chou_37507442_deg_cord
MIR181A1HG	0	0	0	0	0	0	0	0	0	0	0	0	0	0	0	0	0	0	0	0	0	0	0	0	0	0	0	0	1.31991	0	0	1.31991	RNASEQ: Yuon_chou_37507442_deg_cord
CSH1	0	0	0	0	0	0	0	0	0	0	0	0	0	0	0	0	0	0	0	0	0	0	0	0	0	0	0	0	1.31905	0	0	1.31905	RNASEQ: Yuon_chou_37507442_deg_cord
ZNF665	0	0	0	0	0	0	0	0	0	0	0	0	0	0	0	0	0	0	0	0	0	0	0	0	0	0	0	0	1.31821	0	0	1.31821	RNASEQ: Yuon_chou_37507442_deg_cord
LINC01259	0	0	0	0	0	0	0	0	0	0	0	0	0	0	0	0	0	0	0	0	0	0	0	0	0	0	1.1609	0	1.31738	0	0	1.31738	RNASEQ: Yuon_chou_37507442_deg_cord
PAX2	0	0	0	0	0	0	0	0	0	0	0	0	0	0	0	0	0	0	0	0	0	0	0	0	0	0	1.15317	1.31655	0	0	0	1.31655	RNASEQ: Yuon_chou_37507442_cpg_day28
TRAV14DV4	0	0	0	0	0	0	0	0	0	0	0	0	0	0	0	0	0	0	0	0	0	0	0	0	0	0	0	0	1.31493	1.26294	0	1.31493	RNASEQ: Yuon_chou_37507442_deg_cord
LOC105374506	0	0	0	0	0	0	0	0	0	0	0	0	0	0	0	0	0	0	0	0	0	0	0	0	0	0	0	1.31361	0	0	0	1.31361	RNASEQ: Yuon_chou_37507442_cpg_day28
ARMC6	0	0	0	0	0	0	0	0	0	0	0	0	0	0	0	0	0	0	0	0	0	0	0	0	0	0	0	0	1.31335	0	0	1.31335	RNASEQ: Yuon_chou_37507442_deg_cord
CAMP	0	0	0	0	0	0	0	0	0	0	0	0	0	0	0	0	0	0	0	0	0	0	0	0	0	0	0	0	1.31257	0	0	1.31257	RNASEQ: Yuon_chou_37507442_deg_cord
ADARB2	0	0	0	0	0	1.3111	0	0	0	0	0	0	0	0	0	0	0	0	0	0	0	0	0	0	0	0	0	0	0	0	0	1.3111	GWAS: Ambalavanan_25449221
HM13-AS1	0	0	0	0	0	0	0	0	0	0	0	0	0	0	0	0	0	0	0	0	0	0	0	0	0	0	0	1.31072	0	0	0	1.31072	RNASEQ: Yuon_chou_37507442_cpg_day28
ETV5	0	0	0	0	0	0	0	0	0	0	0	0	0	0	1.31071	0	0	0	0	0	0	0	0	0	0	0	0	0	0	0	0	1.31071	MICROARRAY: Fulton_30459472
CYorf15A	0	0	0	0	0	0	0	0	0	0	0	0	0	0	1.31071	0	0	0	0	0	0	0	0	0	0	0	0	0	0	0	0	1.31071	MICROARRAY: Fulton_30459472
STOM	0	0	0	0	0	0	0	0	0	0	0	0	0	0	1.31071	0	0	0	0	0	0	0	0	0	0	0	0	0	0	0	0	1.31071	MICROARRAY: Fulton_30459472
PITX1	0	0	0	0	0	0	0	0	0	0	0	0	0	0	1.31071	0	0	0	0	0	0	0	0	0	0	0	0	0	0	0	0	1.31071	MICROARRAY: Fulton_30459472
TRPC6	0	0	0	0	0	0	0	0	0	0	0	0	0	0	1.31071	0	0	0	0	0	0	0	0	0	0	0	0	0	0	0	0	1.31071	MICROARRAY: Fulton_30459472
KDM5C	0	0	0	0	0	0	0	0	0	0	0	0	0	0	1.31071	0	0	0	0	0	0	0	0	0	0	0	0	0	0	0	0	1.31071	MICROARRAY: Fulton_30459472
CABCOCO1	0	0	0	0	0	0	0	0	0	0	0	0	0	0	1.31071	0	0	0	0	0	0	0	0	0	0	0	0	0	0	0	0	1.31071	MICROARRAY: Fulton_30459472
TCF21	0	0	0	0	0	0	0	0	0	0	0	0	0	0	1.31071	0	0	0	0	0	0	0	0	0	0	0	0	0	0	0	0	1.31071	MICROARRAY: Fulton_30459472
FOXF2	0	0	0	0	0	0	0	0	0	0	0	0	0	0	1.31071	0	0	0	0	0	0	0	0	0	0	0	0	0	0	0	0	1.31071	MICROARRAY: Fulton_30459472
PCDH18	0	0	0	0	0	0	0	0	0	0	0	0	0	0	1.31071	0	0	0	0	0	0	0	0	0	0	0	0	0	0	0	0	1.31071	MICROARRAY: Fulton_30459472
CTSC	0	0	0	0	0	0	0	0	0	0	0	0	0	0	1.31071	0	0	0	0	0	0	0	0	0	0	0	0	0	0	0	0	1.31071	MICROARRAY: Fulton_30459472
FGF9	0	0	0	0	0	0	0	0	0	0	0	0	0	0	1.31071	0	0	0	0	0	0	0	0	0	0	0	0	0	0	0	0	1.31071	MICROARRAY: Fulton_30459472
WFDC1	0	0	0	0	0	0	0	0	0	0	0	0	0	0	1.31071	0	0	0	0	0	0	0	0	0	0	0	0	0	0	0	0	1.31071	MICROARRAY: Fulton_30459472
ADAMTS1	0	0	0	0	0	0	0	0	0	0	0	0	0	0	1.31071	0	0	0	0	0	0	0	0	0	0	0	0	0	0	0	0	1.31071	MICROARRAY: Fulton_30459472
PTGS1	0	0	0	0	0	0	0	0	0	0	0	0	0	0	1.31071	0	0	0	0	0	0	0	0	0	0	0	0	0	0	0	0	1.31071	MICROARRAY: Fulton_30459472
SMAD9	0	0	0	0	0	0	0	0	0	0	0	0	0	0	1.31071	0	0	0	0	0	0	0	0	0	0	0	0	0	0	0	0	1.31071	MICROARRAY: Fulton_30459472
MASP1	0	0	0	0	0	0	0	0	0	0	0	0	0	0	1.31071	0	0	0	0	0	0	0	0	0	0	0	0	0	0	0	0	1.31071	MICROARRAY: Fulton_30459472
NLGN4Y	0	0	0	0	0	0	0	0	0	0	0	0	0	0	1.31071	0	0	0	0	0	0	0	0	0	0	0	0	0	0	0	0	1.31071	MICROARRAY: Fulton_30459472
ADAMTS5	0	0	0	0	0	0	0	0	0	0	0	0	0	0	1.31071	0	0	0	0	0	0	0	0	0	0	0	0	0	0	0	0	1.31071	MICROARRAY: Fulton_30459472
SPRY1	0	0	0	0	0	0	0	0	0	0	0	0	0	0	1.31071	0	0	0	0	0	0	0	0	0	0	0	0	0	0	0	0	1.31071	MICROARRAY: Fulton_30459472
FAM20C	0	0	0	0	0	0	0	0	0	0	0	0	0	0	1.31071	0	0	0	0	0	0	0	0	0	0	0	0	0	0	0	0	1.31071	MICROARRAY: Fulton_30459472
FBN2	0	0	0	0	0	0	0	0	0	0	0	0	0	0	1.31071	0	0	0	0	0	0	0	0	0	0	0	0	0	0	0	0	1.31071	MICROARRAY: Fulton_30459472
SSH2	0	0	0	0	0	0	0	0	0	0	0	0	0	0	1.31071	0	0	0	0	0	0	0	0	0	0	0	0	0	0	0	0	1.31071	MICROARRAY: Fulton_30459472
GSTO2	0	0	0	0	0	0	0	0	0	0	0	0	0	0	1.31071	0	0	0	0	0	0	0	0	0	0	0	0	0	0	0	0	1.31071	MICROARRAY: Fulton_30459472
FGF7	0	0	0	0	0	0	0	0	0	0	0	0	0	0	1.31071	0	0	0	0	0	0	0	0	0	0	0	0	0	0	0	0	1.31071	MICROARRAY: Fulton_30459472
ANGPTL2	0	0	0	0	0	0	0	0	0	0	0	0	0	0	1.31071	0	0	0	0	0	0	0	0	0	0	0	0	0	0	0	0	1.31071	MICROARRAY: Fulton_30459472
RAB38	0	0	0	0	0	0	0	0	0	0	0	0	0	0	1.31071	0	0	0	0	0	0	0	0	0	0	0	0	0	0	0	0	1.31071	MICROARRAY: Fulton_30459472
WNT2	0	0	0	0	0	0	0	0	0	0	0	0	0	0	1.31071	0	0	0	0	0	0	0	0	0	0	0	0	0	0	0	0	1.31071	MICROARRAY: Fulton_30459472
VSIR	0	0	0	0	0	0	0	0	0	0	0	0	0	0	1.31071	0	0	0	0	0	0	0	0	0	0	0	0	0	0	0	0	1.31071	MICROARRAY: Fulton_30459472
OR7E37P	0	0	0	0	0	0	0	0	0	0	0	0	0	0	1.31071	0	0	0	0	0	0	0	0	0	0	0	0	0	0	0	0	1.31071	MICROARRAY: Fulton_30459472
RASSF2	0	0	0	0	0	0	0	0	0	0	0	0	0	0	1.31071	0	0	0	0	0	0	0	0	0	0	0	0	0	0	0	0	1.31071	MICROARRAY: Fulton_30459472
ALG1L	0	0	0	0	0	0	0	0	0	0	0	0	0	0	1.31071	0	0	0	0	0	0	0	0	0	0	0	0	0	0	0	0	1.31071	MICROARRAY: Fulton_30459472
ETS2	0	0	0	0	0	0	0	0	0	0	0	0	0	0	1.31071	0	0	0	0	0	0	0	0	0	0	0	0	0	0	0	0	1.31071	MICROARRAY: Fulton_30459472
PDE7B	0	0	0	0	0	0	0	0	0	0	0	0	0	0	1.31071	0	0	0	0	0	0	0	0	0	0	0	0	0	0	0	0	1.31071	MICROARRAY: Fulton_30459472
PTH1R	0	0	0	0	0	0	0	0	0	0	0	0	0	0	1.31071	0	0	0	0	0	0	0	0	0	0	0	0	0	0	0	0	1.31071	MICROARRAY: Fulton_30459472
BHMT2	0	0	0	0	0	0	0	0	0	0	0	0	0	0	1.31071	0	0	0	0	0	0	0	0	0	0	0	0	0	0	0	0	1.31071	MICROARRAY: Fulton_30459472
GZMH	0	0	0	0	0	0	0	0	0	0	0	0	0	0	1.31071	0	0	0	0	0	0	0	0	0	0	0	0	0	0	0	0	1.31071	MICROARRAY: Fulton_30459472
VGLL3	0	0	0	0	0	0	0	0	0	0	0	0	0	0	1.31071	0	0	0	0	0	0	0	0	0	0	0	0	0	0	0	0	1.31071	MICROARRAY: Fulton_30459472
SLC40A1	0	0	0	0	0	0	0	0	0	0	0	0	0	0	1.31071	0	0	0	0	0	0	0	0	0	0	0	0	0	0	0	0	1.31071	MICROARRAY: Fulton_30459472
SLC16A6	0	0	0	0	0	0	0	0	0	0	0	0	0	0	1.31071	0	0	0	0	0	0	0	0	0	0	0	0	0	0	0	0	1.31071	MICROARRAY: Fulton_30459472
MMP3	0	0	0	0	0	0	0	0	0	0	0	0	0	0	1.31071	0	0	0	0	0	0	0	0	0	0	0	0	0	0	0	0	1.31071	MICROARRAY: Fulton_30459472
SLC9A9	0	0	0	0	0	0	0	0	0	0	0	0	0	0	1.31071	0	0	0	0	0	0	0	0	0	0	0	0	0	0	0	0	1.31071	MICROARRAY: Fulton_30459472
TEX29	0	0	0	0	0	0	0	0	0	0	0	0	0	0	1.31071	0	0	0	0	0	0	0	0	0	0	0	0	0	0	0	0	1.31071	MICROARRAY: Fulton_30459472
SLC18B1	0	0	0	0	0	0	0	0	0	0	0	0	0	0	1.31071	0	0	0	0	0	0	0	0	0	0	0	0	0	0	0	0	1.31071	MICROARRAY: Fulton_30459472
PPAP2A	0	0	0	0	0	0	0	0	0	0	0	0	0	0	1.31071	0	0	0	0	0	0	0	0	0	0	0	0	0	0	0	0	1.31071	MICROARRAY: Fulton_30459472
GFRA1	0	0	0	0	0	0	0	0	0	0	0	0	0	0	1.31071	0	0	0	0	0	0	0	0	0	0	0	0	0	0	0	0	1.31071	MICROARRAY: Fulton_30459472
CLDN23	0	0	0	0	0	0	0	0	0	0	0	0	0	0	1.31071	0	0	0	0	0	0	0	0	0	0	0	0	0	0	0	0	1.31071	MICROARRAY: Fulton_30459472
PAG1	0	0	0	0	0	0	0	0	0	0	0	0	0	0	1.31071	0	0	0	0	0	0	0	0	0	0	0	0	0	0	0	0	1.31071	MICROARRAY: Fulton_30459472
GLDN	0	0	0	0	0	0	0	0	0	0	0	0	0	0	1.31071	0	0	0	0	0	0	0	0	0	0	0	0	0	0	0	0	1.31071	MICROARRAY: Fulton_30459472
VWA5A	0	0	0	0	0	0	0	0	0	0	0	0	0	0	1.31071	0	0	0	0	0	0	0	0	0	0	0	0	0	0	0	0	1.31071	MICROARRAY: Fulton_30459472
BCHE	0	0	0	0	0	0	0	0	0	0	0	0	0	0	1.31071	0	0	0	0	0	0	0	0	0	0	0	0	0	0	0	0	1.31071	MICROARRAY: Fulton_30459472
RASL12	0	0	0	0	0	0	0	0	0	0	0	0	0	0	1.31071	0	0	0	0	0	0	0	0	0	0	0	0	0	0	0	0	1.31071	MICROARRAY: Fulton_30459472
ASS1	0	0	0	0	0	0	0	0	0	0	0	0	0	0	1.31071	0	0	0	0	0	0	0	0	0	0	0	0	0	0	0	0	1.31071	MICROARRAY: Fulton_30459472
SGCD	0	0	0	0	0	0	0	0	0	0	0	0	0	0	1.31071	0	0	0	0	0	0	0	0	0	0	0	0	0	0	0	0	1.31071	MICROARRAY: Fulton_30459472
PSG4	0	0	0	0	0	0	0	0	0	0	0	0	0	0	1.31071	0	0	0	0	0	0	0	0	0	0	0	0	0	0	0	0	1.31071	MICROARRAY: Fulton_30459472
RGS5	0	0	0	0	0	0	0	0	0	0	0	0	0	0	1.31071	0	0	0	0	0	0	0	0	0	0	0	0	0	0	0	0	1.31071	MICROARRAY: Fulton_30459472
ADAMTS8	0	0	0	0	0	0	0	0	0	0	0	0	0	0	1.31071	0	0	0	0	0	0	0	0	0	0	0	0	0	0	0	0	1.31071	MICROARRAY: Fulton_30459472
CXCL12	0	0	0	0	0	0	0	0	0	0	0	0	0	0	1.31071	0	0	0	0	0	0	0	0	0	0	0	0	0	0	0	0	1.31071	MICROARRAY: Fulton_30459472
RNASE4	0	0	0	0	0	0	0	0	0	0	0	0	0	0	1.31071	0	0	0	0	0	0	0	0	0	0	0	0	0	0	0	0	1.31071	MICROARRAY: Fulton_30459472
RGCC	0	0	0	0	0	0	0	0	0	0	0	0	0	0	1.31071	0	0	0	0	0	0	0	0	0	0	0	0	0	0	0	0	1.31071	MICROARRAY: Fulton_30459472
PTGES	0	0	0	0	0	0	0	0	0	0	0	0	0	0	1.31071	0	0	0	0	0	0	0	0	0	0	0	0	0	0	0	0	1.31071	MICROARRAY: Fulton_30459472
CTF2P	0	0	0	0	0	0	0	0	0	0	0	0	0	0	1.31071	0	0	0	0	0	0	0	0	0	0	0	0	0	0	0	0	1.31071	MICROARRAY: Fulton_30459472
STOX2	0	0	0	0	0	0	0	0	0	0	0	0	0	0	1.31071	0	0	0	0	0	0	0	0	0	0	0	0	0	0	0	0	1.31071	MICROARRAY: Fulton_30459472
BMP4	0	0	0	0	0	0	0	0	0	0	0	0	0	0	1.31071	0	0	0	0	0	0	0	0	0	0	0	0	0	0	0	0	1.31071	MICROARRAY: Fulton_30459472
FOXQ1	0	0	0	0	0	0	0	0	0	0	0	0	0	0	1.31071	0	0	0	0	0	0	0	0	0	0	0	0	0	0	0	0	1.31071	MICROARRAY: Fulton_30459472
CAVIN2	0	0	0	0	0	0	0	0	0	0	0	0	0	0	1.31071	0	0	0	0	0	0	0	0	0	0	0	0	0	0	0	0	1.31071	MICROARRAY: Fulton_30459472
PSG7	0	0	0	0	0	0	0	0	0	0	0	0	0	0	1.31071	0	0	0	0	0	0	0	0	0	0	0	0	0	0	0	0	1.31071	MICROARRAY: Fulton_30459472
SLC2A12	0	0	0	0	0	0	0	0	0	0	0	0	0	0	1.31071	0	0	0	0	0	0	0	0	0	0	0	0	0	0	0	0	1.31071	MICROARRAY: Fulton_30459472
MATN2	0	0	0	0	0	0	0	0	0	0	0	0	0	0	1.31071	0	0	0	0	0	0	0	0	0	0	0	0	0	0	0	0	1.31071	MICROARRAY: Fulton_30459472
PDGFRA	0	0	0	0	0	0	0	0	0	0	0	0	0	0	1.31071	0	0	0	0	0	0	0	0	0	0	0	0	0	0	0	0	1.31071	MICROARRAY: Fulton_30459472
SLC16A14	0	0	0	0	0	0	0	0	0	0	0	0	0	0	1.31071	0	0	0	0	0	0	0	0	0	0	0	0	0	0	0	0	1.31071	MICROARRAY: Fulton_30459472
KITLG	0	0	0	0	0	0	0	0	0	0	0	0	0	0	1.31071	0	0	0	0	0	0	0	0	0	0	0	0	0	0	0	0	1.31071	MICROARRAY: Fulton_30459472
DLL1	0	0	0	0	0	0	0	0	0	0	0	0	0	0	1.31071	0	0	0	0	0	0	0	0	0	0	0	0	0	0	0	0	1.31071	MICROARRAY: Fulton_30459472
CDH2	0	0	0	0	0	0	0	0	0	0	0	0	0	0	1.31071	0	0	0	0	0	0	0	0	0	0	0	0	0	0	0	0	1.31071	MICROARRAY: Fulton_30459472
DENND2A	0	0	0	0	0	0	0	0	0	0	0	0	0	0	1.31071	0	0	0	0	0	0	0	0	0	0	0	0	0	0	0	0	1.31071	MICROARRAY: Fulton_30459472
ST3GAL1	0	0	0	0	0	0	0	0	0	0	0	0	0	0	1.31071	0	0	0	0	0	0	0	0	0	0	0	0	0	0	0	0	1.31071	MICROARRAY: Fulton_30459472
RARRES2	0	0	0	0	0	0	0	0	0	0	0	0	0	0	1.31071	0	0	0	0	0	0	0	0	0	0	0	0	0	0	0	0	1.31071	MICROARRAY: Fulton_30459472
PRR5L	0	0	0	0	0	0	0	0	0	0	0	0	0	0	1.31071	0	0	0	0	0	0	0	0	0	0	0	0	0	0	0	0	1.31071	MICROARRAY: Fulton_30459472
KLHL13	0	0	0	0	0	0	0	0	0	0	0	0	0	0	1.31071	0	0	0	0	0	0	0	0	0	0	0	0	0	0	0	0	1.31071	MICROARRAY: Fulton_30459472
RASL11B	0	0	0	0	0	0	0	0	0	0	0	0	0	0	1.31071	0	0	0	0	0	0	0	0	0	0	0	0	0	0	0	0	1.31071	MICROARRAY: Fulton_30459472
COLEC12	0	0	0	0	0	0	0	0	0	0	0	0	0	0	1.31071	0	0	0	0	0	0	0	0	0	0	0	0	0	0	0	0	1.31071	MICROARRAY: Fulton_30459472
TWIST1	0	0	0	0	0	0	0	0	0	0	0	0	0	0	1.31071	0	0	0	0	0	0	0	0	0	0	0	0	0	0	0	0	1.31071	MICROARRAY: Fulton_30459472
PTGR1	0	0	0	0	0	0	0	0	0	0	0	0	0	0	1.31071	0	0	0	0	0	0	0	0	0	0	0	0	0	0	0	0	1.31071	MICROARRAY: Fulton_30459472
MMP27	0	0	0	0	0	0	0	0	0	0	0	0	0	0	1.31071	0	0	0	0	0	0	0	0	0	0	0	0	0	0	0	0	1.31071	MICROARRAY: Fulton_30459472
CYGB	0	0	0	0	0	0	0	0	0	0	0	0	0	0	1.31071	0	0	0	0	0	0	0	0	0	0	0	0	0	0	0	0	1.31071	MICROARRAY: Fulton_30459472
SMPDL3A	0	0	0	0	0	0	0	0	0	0	0	0	0	0	1.31071	0	0	0	0	0	0	0	0	0	0	0	0	0	0	0	0	1.31071	MICROARRAY: Fulton_30459472
ADH1A	0	0	0	0	0	0	0	0	0	0	0	0	0	0	1.31071	0	0	0	0	0	0	0	0	0	0	0	0	0	0	0	0	1.31071	MICROARRAY: Fulton_30459472
RASL11A	0	0	0	0	0	0	0	0	0	0	0	0	0	0	1.31071	0	0	0	0	0	0	0	0	0	0	0	0	0	0	0	0	1.31071	MICROARRAY: Fulton_30459472
COL4A5	0	0	0	0	0	0	0	0	0	0	0	0	0	0	1.31071	0	0	0	0	0	0	0	0	0	0	0	0	0	0	0	0	1.31071	MICROARRAY: Fulton_30459472
RGS2	0	0	0	0	0	0	0	0	0	0	0	0	0	0	1.31071	0	0	0	0	0	0	0	0	0	0	0	0	0	0	0	0	1.31071	MICROARRAY: Fulton_30459472
CORIN	0	0	0	0	0	0	0	0	0	0	0	0	0	0	1.31071	0	0	0	0	0	0	0	0	0	0	0	0	0	0	0	0	1.31071	MICROARRAY: Fulton_30459472
KCNF1	0	0	0	0	0	0	0	0	0	0	0	0	0	0	1.31071	0	0	0	0	0	0	0	0	0	0	0	0	0	0	0	0	1.31071	MICROARRAY: Fulton_30459472
SEMA5A	0	0	0	0	0	0	0	0	0	0	0	0	0	0	1.31071	0	0	0	0	0	0	1.29875	0	0	0	0	0	0	0	0	0	1.31071	MICROARRAY: Fulton_30459472
SVEP1	0	0	0	0	0	0	0	0	0	0	0	0	0	0	1.31071	0	0	0	0	0	0	0	0	0	0	0	0	0	0	0	0	1.31071	MICROARRAY: Fulton_30459472
TRPA1	0	0	0	0	0	0	0	0	0	0	0	0	0	0	1.31071	0	0	0	0	0	0	0	0	0	0	0	0	0	0	0	0	1.31071	MICROARRAY: Fulton_30459472
CES1	0	0	0	0	0	0	0	0	0	0	0	0	0	0	1.31071	0	0	0	0	0	0	0	0	0	0	0	0	0	0	0	0	1.31071	MICROARRAY: Fulton_30459472
NSG1	0	0	0	0	0	0	0	0	0	0	0	0	0	0	1.31071	0	0	0	0	0	0	0	0	0	0	0	0	0	0	0	0	1.31071	MICROARRAY: Fulton_30459472
SEMA3C	0	0	0	0	0	0	0	0	0	0	0	0	0	0	1.31071	0	0	0	0	0	0	0	0	0	0	0	0	0	0	0	0	1.31071	MICROARRAY: Fulton_30459472
ADH1B	0	0	0	0	0	0	0	0	0	0	0	0	0	0	1.31071	0	0	0	0	0	0	0	0	0	0	0	0	0	0	0	0	1.31071	MICROARRAY: Fulton_30459472
PLPP7	0	0	0	0	0	0	0	0	0	0	0	0	0	0	1.31071	0	0	0	0	0	0	0	0	0	0	0	0	0	0	0	0	1.31071	MICROARRAY: Fulton_30459472
PTGDR2	0	0	0	0	0	0	0	0	0	0	0	0	0	0	1.31071	0	0	0	0	0	0	0	0	0	0	0	0	0	0	0	0	1.31071	MICROARRAY: Fulton_30459472
CRYBB2	0	0	0	0	0	0	0	0	0	0	0	0	0	0	1.31071	0	0	0	0	0	0	0	0	0	0	0	0	0	0	0	0	1.31071	MICROARRAY: Fulton_30459472
ITGA8	0	0	0	0	0	0	0	0	0	0	0	0	0	0	1.31071	0	0	0	0	0	0	0	0	0	0	0	0	0	0	0	0	1.31071	MICROARRAY: Fulton_30459472
TSPAN12	0	0	0	0	0	0	0	0	0	0	0	0	0	0	1.31071	0	0	0	0	0	0	0	0	0	0	0	0	0	0	0	0	1.31071	MICROARRAY: Fulton_30459472
COL21A1	0	0	0	0	0	0	0	0	0	0	0	0	0	0	1.31071	0	0	0	0	0	0	0	0	0	0	0	0	0	0	0	0	1.31071	MICROARRAY: Fulton_30459472
DACH1	0	0	0	0	0	0	0	0	0	0	0	0	0	0	1.31071	0	0	0	0	0	0	0	0	0	0	0	0	0	0	0	0	1.31071	MICROARRAY: Fulton_30459472
TPM1	0	0	0	0	0	0	0	0	0	0	0	0	0	0	1.31071	0	0	0	0	0	0	0	0	0	0	0	0	0	0	0	0	1.31071	MICROARRAY: Fulton_30459472
ENSG00000289398	0	0	0	0	0	0	0	0	0	0	0	0	0	0	0	0	0	0	0	0	0	0	0	0	0	0	0	0	1.30953	0	0	1.30953	RNASEQ: Yuon_chou_37507442_deg_cord
CEACAM19	0	0	0	0	0	0	0	0	0	0	0	0	0	0	0	0	0	0	0	0	0	0	0	0	0	0	0	0	1.3088	0	0	1.3088	RNASEQ: Yuon_chou_37507442_deg_cord
H3-3A-DT	0	0	0	0	0	0	0	0	0	0	0	0	0	0	0	0	0	0	0	0	0	0	0	0	0	0	0	0	1.30807	0	0	1.30807	RNASEQ: Yuon_chou_37507442_deg_cord
DLG1	0	0	0	0	0	0	0	0	0	0	0	0	0	0	0	0	0	0	0	0	0	0	0	0	0	0	0	1.30787	0	0	0	1.30787	RNASEQ: Yuon_chou_37507442_cpg_day28
NAAA	0	0	0	0	0	0	0	0	0	0	0	0	0	0	0	0	0	0	0	0	0	0	0	0	0	0	0	0	1.22889	1.30742	0	1.30742	RNASEQ: Yuon_chou_37507442_deg_day14
SEC14L6	0	0	0	0	0	0	0	0	0	0	0	0	0	0	0	0	0	0	0	0	0	0	0	0	0	0	0	0	1.30735	0	0	1.30735	RNASEQ: Yuon_chou_37507442_deg_cord
PPM1N	0	0	0	0	0	0	0	0	0	0	0	0	0	0	0	0	0	0	0	0	0	0	0	0	0	0	0	0	0	1.30718	0	1.30718	RNASEQ: Yuon_chou_37507442_deg_day14
H2AC14	0	0	0	0	0	0	0	0	0	0	0	0	0	0	0	0	0	0	0	0	0	0	0	0	0	0	0	0	0	1.30694	0	1.30694	RNASEQ: Yuon_chou_37507442_deg_day14
ARHGAP33	0	0	0	0	0	0	0	0	0	0	0	0	0	0	0	0	0	0	0	0	0	0	0	0	0	0	0	0	1.30663	0	0	1.30663	RNASEQ: Yuon_chou_37507442_deg_cord
CCNA2	0	0	0	0	0	0	0	0	0	0	0	0	0	0	0	0	0	0	0	0	0	0	0	0	0	0	0	0	1.21943	1.30647	0	1.30647	RNASEQ: Yuon_chou_37507442_deg_day14
NSMC4A	0	0	0	0	0	1.30615	0	0	0	0	0	0	0	0	0	0	0	0	0	0	0	0	0	0	0	0	0	0	0	0	0	1.30615	GWAS: Ambalavanan_25449221
MAFG	0	0	0	0	0	0	0	0	0	0	0	0	0	0	0	0	0	0	0	0	0	0	0	0	0	0	0	0	1.30593	0	0	1.30593	RNASEQ: Yuon_chou_37507442_deg_cord
SFMBT2	0	0	0	0	0	0	0	0	0	0	0	0	0	0	0	0	0	0	0	0	0	0	0	0	0	0	0	0	1.30523	0	0	1.30523	RNASEQ: Yuon_chou_37507442_deg_cord
UTRN	0	0	0	0	0	0	0	0	0	0	0	0	0	0	0	0	0	0	0	0	0	0	0	0	0	0	0	1.30508	1.23568	0	0	1.30508	RNASEQ: Yuon_chou_37507442_cpg_day28
ENSG00000264066	0	0	0	0	0	0	0	0	0	0	0	0	0	0	0	0	0	0	0	0	0	0	0	0	0	0	0	0	0	1.30506	0	1.30506	RNASEQ: Yuon_chou_37507442_deg_day14
DBF4B	0	0	0	0	0	0	0	0	0	0	0	0	0	0	0	0	0	0	0	0	0	0	0	0	0	0	1.14849	0	0	1.3046	0	1.3046	RNASEQ: Yuon_chou_37507442_deg_day14
TUBG1	0	0	0	0	0	0	0	0	0	0	0	0	0	0	0	0	0	0	0	0	0	0	0	0	0	0	0	0	0	1.30437	0	1.30437	RNASEQ: Yuon_chou_37507442_deg_day14
FAM114A2	0	0	0	0	0	0	0	0	0	0	0	0	0	0	0	0	0	0	0	0	0	0	0	0	0	0	0	0	0	1.30391	0	1.30391	RNASEQ: Yuon_chou_37507442_deg_day14
PXDNL	0	0	0	0	0	0	0	0	0	0	0	0	0	0	0	0	0	0	0	0	0	0	0	0	0	0	0	0	1.30386	0	0	1.30386	RNASEQ: Yuon_chou_37507442_deg_cord
ZNF155	0	0	0	0	0	0	0	0	0	0	0	0	0	0	0	0	0	0	0	0	0	0	0	0	0	0	0	0	0	1.30368	0	1.30368	RNASEQ: Yuon_chou_37507442_deg_day14
POM121	0	0	0	0	0	0	0	0	0	0	0	0	0	0	0	0	0	0	0	0	0	0	0	0	0	0	0	0	0	1.30345	0	1.30345	RNASEQ: Yuon_chou_37507442_deg_day14
FOXM1	0	0	0	0	0	0	0	0	0	0	0	0	0	0	0	0	0	0	0	0	0	0	0	0	0	0	0	0	0	1.30323	0	1.30323	RNASEQ: Yuon_chou_37507442_deg_day14
SPON2	0	0	0	0	0	0	0	0	0	0	0	0	0	0	0	0	0	0	0	0	0	0	0	0	0	0	0	0	1.30318	0	0	1.30318	RNASEQ: Yuon_chou_37507442_deg_cord
CDCA2	0	0	0	0	0	0	0	0	0	0	0	0	0	0	0	0	0	0	0	0	0	0	0	0	0	0	0	0	0	1.303	0	1.303	RNASEQ: Yuon_chou_37507442_deg_day14
ENC1	0	0	0	0	0	0	0	0	0	0	0	0	0	0	0	0	0	0	0	0	0	0	0	0	0	0	0	0	1.22292	1.30278	0	1.30278	RNASEQ: Yuon_chou_37507442_deg_day14
CIP2A	0	0	0	0	0	0	0	0	0	0	0	0	0	0	0	0	0	0	0	0	0	0	0	0	0	0	0	0	1.30251	0	0	1.30251	RNASEQ: Yuon_chou_37507442_deg_cord
MAFF	0	0	0	0	0	0	0	0	0	0	0	0	0	0	0	0	0	0	0	0	0	0	0	0	0	0	0	1.30234	0	0	0	1.30234	RNASEQ: Yuon_chou_37507442_cpg_day28
INO80C	0	0	0	0	0	0	0	0	0	0	0	0	0	0	0	0	0	0	0	0	0	0	0	0	0	0	0	0	0	1.30233	0	1.30233	RNASEQ: Yuon_chou_37507442_deg_day14
THNSL1	0	0	0	0	0	0	0	0	0	0	0	0	0	0	0	0	0	0	0	0	0	0	0	0	0	0	0	0	1.21514	1.30211	0	1.30211	RNASEQ: Yuon_chou_37507442_deg_day14
HECW2	0	0	0	0	0	0	0	0	0	0	0	0	0	0	0	0	0	0	0	0	0	0	0	0	0	0	0	0	0	1.30189	0	1.30189	RNASEQ: Yuon_chou_37507442_deg_day14
BTG1P1	0	0	0	0	0	0	0	0	0	0	0	0	0	0	0	0	0	0	0	0	0	0	0	0	0	0	0	0	1.30185	0	0	1.30185	RNASEQ: Yuon_chou_37507442_deg_cord
PLEKHA1	0	0	0	0	0	0	0	0	0	0	0	0	0	0	0	0	0	0	0	0	0	0	0	0	0	0	0	0	0	1.30144	0	1.30144	RNASEQ: Yuon_chou_37507442_deg_day14
NDST2	0	0	0	0	0	0	0	0	0	0	0	0	0	0	0	0	0	0	0	0	0	0	0	0	0	0	0	1.14691	0	1.30123	0	1.30123	RNASEQ: Yuon_chou_37507442_deg_day14
EIF4E	0	0	0	0	0	0	0	0	0	0	0	0	0	0	0	0	0	0	0	0	0	0	0	0	0	0	0	0	1.3012	0	0	1.3012	RNASEQ: Yuon_chou_37507442_deg_cord
KIFC1	0	0	0	0	0	0	0	0	0	0	0	0	0	0	0	0	0	0	0	0	0	0	0	0	0	0	1.16271	0	1.24127	1.30101	0	1.30101	RNASEQ: Yuon_chou_37507442_deg_day14
ZSCAN21	0	0	0	0	0	0	0	0	0	0	0	0	0	0	0	0	0	0	0	0	0	0	0	0	0	0	0	0	1.30055	0	0	1.30055	RNASEQ: Yuon_chou_37507442_deg_cord
C6orf136	0	0	0	0	0	0	0	0	0	0	0	0	0	0	0	0	0	0	0	0	0	0	0	0	0	0	1.16988	0	0	1.30014	0	1.30014	RNASEQ: Yuon_chou_37507442_deg_day14
TBC1D9	0	0	0	0	0	0	0	0	0	0	0	0	0	0	0	0	0	0	0	0	0	0	0	0	0	0	0	0	0	1.29992	0	1.29992	RNASEQ: Yuon_chou_37507442_deg_day14
FKBP5	0	0	0	0	0	0	0	0	0	0	0	0	0	0	0	0	0	0	0	0	0	0	0	0	0	0	0	0	1.29992	0	0	1.29992	RNASEQ: Yuon_chou_37507442_deg_cord
MME	0	0	0	0	0	0	0	0	0	0	0	0	0	0	0	0	0	0	0	0	0	0	0	0	0	0	0	0	0	1.29971	0	1.29971	RNASEQ: Yuon_chou_37507442_deg_day14
RPL4P7	0	0	0	0	0	0	0	0	0	0	0	0	0	0	0	0	0	0	0	0	0	0	0	0	0	0	0	0	0	1.2995	0	1.2995	RNASEQ: Yuon_chou_37507442_deg_day14
AP004609.3	0	0	0	0	0	0	0	0	0	0	0	0	0	0	0	0	0	0	0	0	0	0	0	0	0	0	0	0	1.29928	0	0	1.29928	RNASEQ: Yuon_chou_37507442_deg_cord
GSE1	0	0	0	0	0	0	0	0	0	0	0	0	0	0	0	0	0	0	0	0	0	0	0	0	0	0	1.16355	0	0	1.29928	0	1.29928	RNASEQ: Yuon_chou_37507442_deg_day14
RTN1	0	0	0	0	0	0	0	0	0	0	0	0	0	0	0	0	0	0	0	0	0	0	0	0	0	0	0	0	0	1.29907	0	1.29907	RNASEQ: Yuon_chou_37507442_deg_day14
LINC02325	0	0	0	0	0	0	0	0	0	0	0	0	0	0	0	0	0	0	0	0	0	0	0	0	0	0	0	0	1.24581	1.29886	0	1.29886	RNASEQ: Yuon_chou_37507442_deg_day14
SCG3	0	0	0	0	0	0	0	0	0	0	0	0	0	0	0	0	0	0	0	0	0	1.29875	0	0	0	0	0	0	0	0	0	1.29875	MICROARRAY: Windhorst_37090732
CRIP1	0	0	0	0	0	0	0	0	0	0	0	0	0	0	0	0	0	0	0	0	0	1.29875	0	0	0	0	0	0	0	0	0	1.29875	MICROARRAY: Windhorst_37090732
GAL	0	0	0	0	0	0	0	0	0	0	0	0	0	0	0	0	0	0	0	0	0	1.29875	0	0	0	0	0	0	0	0	0	1.29875	MICROARRAY: Windhorst_37090732
HPR	0	0	0	0	0	0	0	0	0	0	0	0	0	0	0	0	0	0	0	0	0	1.29875	0	0	0	0	0	0	0	0	0	1.29875	MICROARRAY: Windhorst_37090732
ZNF576	0	0	0	0	0	0	0	0	0	0	0	0	0	0	0	0	0	0	0	0	0	1.29875	0	0	0	0	0	0	0	0	0	1.29875	MICROARRAY: Windhorst_37090732
KLKB1	0	0	0	0	0	0	0	0	0	0	0	0	0	0	0	0	0	0	0	0	0	1.29875	0	0	0	0	0	0	0	0	0	1.29875	MICROARRAY: Windhorst_37090732
FZD2	0	0	0	0	0	0	0	0	0	0	0	0	0	0	0	0	0	0	0	0	0	1.29875	0	0	0	0	0	0	0	0	0	1.29875	MICROARRAY: Windhorst_37090732
ZNF175	0	0	0	0	0	0	0	0	0	0	0	0	0	0	0	0	0	0	0	0	0	1.29875	0	0	0	0	0	0	0	0	0	1.29875	MICROARRAY: Windhorst_37090732
FKBP14	0	0	0	0	0	0	0	0	0	0	0	0	0	0	0	0	0	0	0	0	0	1.29875	0	0	0	0	0	0	0	0	0	1.29875	MICROARRAY: Windhorst_37090732
PGLYRP1	0	0	0	0	0	0	0	0	0	0	0	0	0	0	0	0	0	0	0	0	0	1.29875	0	0	0	0	0	0	0	0	0	1.29875	MICROARRAY: Windhorst_37090732
SLC24A3	0	0	0	0	0	0	0	0	0	0	0	0	0	0	0	0	0	0	0	0	0	1.29875	0	0	0	0	0	0	0	0	0	1.29875	MICROARRAY: Windhorst_37090732
SCNN1G	0	0	0	0	0	0	0	0	0	0	0	0	0	0	0	0	0	0	0	0	0	1.29875	0	0	0	0	0	0	0	0	0	1.29875	MICROARRAY: Windhorst_37090732
GYG2	0	0	0	0	0	0	0	0	0	0	0	0	0	0	0	0	0	0	0	0	0	1.29875	0	0	0	0	0	0	0	0	0	1.29875	MICROARRAY: Windhorst_37090732
ACAA1	0	0	0	0	0	0	0	0	0	0	0	0	0	0	0	0	0	0	0	0	0	1.29875	0	0	0	0	0	0	0	0	0	1.29875	MICROARRAY: Windhorst_37090732
RARS2	0	0	0	0	0	0	0	0	0	0	0	0	0	0	0	0	0	0	0	0	0	1.29875	0	0	0	0	0	0	0	0	0	1.29875	MICROARRAY: Windhorst_37090732
CDH13	0	0	0	0	0	0	0	0	0	0	0	0	0	0	0	0	0	0	0	0	0	1.29875	0	0	0	0	0	0	0	0	0	1.29875	MICROARRAY: Windhorst_37090732
DNAJB1	0	0	0	0	0	0	0	0	0	0	0	0	0	0	0	0	0	0	0	0	0	1.29875	0	0	0	0	0	0	0	0	0	1.29875	MICROARRAY: Windhorst_37090732
DUSP13	0	0	0	0	0	0	0	0	0	0	0	0	0	0	0	0	0	0	0	0	0	1.29875	0	0	0	0	0	0	0	0	0	1.29875	MICROARRAY: Windhorst_37090732
RNH1	0	0	0	0	0	0	0	0	0	0	0	0	0	0	0	0	0	0	0	0	0	1.29875	0	0	0	0	0	0	0	0	0	1.29875	MICROARRAY: Windhorst_37090732
CEMIP	0	0	0	0	0	0	0	0	0	0	0	0	0	0	0	0	0	0	0	0	0	1.29875	0	0	0	0	0	0	0	0	0	1.29875	MICROARRAY: Windhorst_37090732
SRD5A2	0	0	0	0	0	0	0	0	0	0	0	0	0	0	0	0	0	0	0	0	0	1.29875	0	0	0	0	0	0	0	0	0	1.29875	MICROARRAY: Windhorst_37090732
PTPRCAP	0	0	0	0	0	0	0	0	0	0	0	0	0	0	0	0	0	0	0	0	0	1.29875	0	0	0	0	0	0	0	0	0	1.29875	MICROARRAY: Windhorst_37090732
IGSF6	0	0	0	0	0	0	0	0	0	0	0	0	0	0	0	0	0	0	0	0	0	1.29875	0	0	0	0	0	0	0	0	0	1.29875	MICROARRAY: Windhorst_37090732
ADGRF5	0	0	0	0	0	0	0	0	0	0	0	0	0	0	0	0	0	0	0	0	0	1.29875	0	0	0	0	0	0	0	0	0	1.29875	MICROARRAY: Windhorst_37090732
SSRP1	0	0	0	0	0	0	0	0	0	0	0	0	0	0	0	0	0	0	0	0	0	1.29875	0	0	0	0	0	0	0	0	0	1.29875	MICROARRAY: Windhorst_37090732
PFN2	0	0	0	0	0	0	0	0	0	0	0	0	0	0	0	0	0	0	0	0	0	1.29875	0	0	0	0	0	0	0	0	0	1.29875	MICROARRAY: Windhorst_37090732
MRPL33	0	0	0	0	0	0	0	0	0	0	0	0	0	0	0	0	0	0	0	0	0	1.29875	0	0	0	0	0	0	0	0	0	1.29875	MICROARRAY: Windhorst_37090732
DNAH3	0	0	0	0	0	0	0	0	0	0	0	0	0	0	0	0	0	0	0	0	0	1.29875	0	0	0	0	0	0	0	0	0	1.29875	MICROARRAY: Windhorst_37090732
MANSC1	0	0	0	0	0	0	0	0	0	0	0	0	0	0	0	0	0	0	0	0	0	1.29875	0	0	0	0	0	0	0	0	0	1.29875	MICROARRAY: Windhorst_37090732
LIMD1	0	0	0	0	0	0	0	0	0	0	0	0	0	0	0	0	0	0	0	0	0	1.29875	0	0	0	0	0	0	0	0	0	1.29875	MICROARRAY: Windhorst_37090732
PRKCI	0	0	0	0	0	0	0	0	0	0	0	0	0	0	0	0	0	0	0	0	0	1.29875	0	0	0	0	0	0	0	0	0	1.29875	MICROARRAY: Windhorst_37090732
NIP7	0	0	0	0	0	0	0	0	0	0	0	0	0	0	0	0	0	0	0	0	0	1.29875	0	0	0	0	0	0	0	0	0	1.29875	MICROARRAY: Windhorst_37090732
HIBADH	0	0	0	0	0	0	0	0	0	0	0	0	0	0	0	0	0	0	0	0	0	1.29875	0	0	0	0	0	0	0	0	0	1.29875	MICROARRAY: Windhorst_37090732
ST8SIA5	0	0	0	0	0	0	0	0	0	0	0	0	0	0	0	0	0	0	0	0	0	1.29875	0	0	0	0	0	0	0	0	0	1.29875	MICROARRAY: Windhorst_37090732
PDGFRB	0	0	0	0	0	0	0	0	0	0	0	0	0	0	0	0	0	0	0	0	0	1.29875	0	0	0	0	0	0	0	0	0	1.29875	MICROARRAY: Windhorst_37090732
BATF	0	0	0	0	0	0	0	0	0	0	0	0	0	0	0	0	0	0	0	0	0	1.29875	0	0	0	0	0	0	0	0	0	1.29875	MICROARRAY: Windhorst_37090732
RAD51D	0	0	0	0	0	0	0	0	0	0	0	0	0	0	0	0	0	0	0	0	0	1.29875	0	0	0	0	0	0	0	0	0	1.29875	MICROARRAY: Windhorst_37090732
RNASE1	0	0	0	0	0	0	0	0	0	0	0	0	0	0	0	0	0	0	0	0	0	1.29875	0	0	0	0	0	0	0	0	0	1.29875	MICROARRAY: Windhorst_37090732
RAB32	0	0	0	0	0	0	0	0	0	0	0	0	0	0	0	0	0	0	0	0	0	1.29875	0	0	0	0	0	0	0	0	0	1.29875	MICROARRAY: Windhorst_37090732
WDR5	0	0	0	0	0	0	0	0	0	0	0	0	0	0	0	0	0	0	0	0	0	1.29875	0	0	0	0	0	0	0	0	0	1.29875	MICROARRAY: Windhorst_37090732
HEBP2	0	0	0	0	0	0	0	0	0	0	0	0	0	0	0	0	0	0	0	0	0	1.29875	0	0	0	0	0	0	0	0	0	1.29875	MICROARRAY: Windhorst_37090732
ZNF274	0	0	0	0	0	0	0	0	0	0	0	0	0	0	0	0	0	0	0	0	0	1.29875	0	0	0	0	0	0	0	0	0	1.29875	MICROARRAY: Windhorst_37090732
RNF24	0	0	0	0	0	0	0	0	0	0	0	0	0	0	0	0	0	0	0	0	0	1.29875	0	0	0	0	0	0	0	0	0	1.29875	MICROARRAY: Windhorst_37090732
ACAT1	0	0	0	0	0	0	0	0	0	0	0	0	0	0	0	0	0	0	0	0	0	1.29875	0	0	0	0	0	0	0	0	0	1.29875	MICROARRAY: Windhorst_37090732
CD63	0	0	0	0	0	0	0	0	0	0	0	0	0	0	0	0	0	0	0	0	0	1.29875	0	0	0	0	0	0	0	0	0	1.29875	MICROARRAY: Windhorst_37090732
MRPS10	0	0	0	0	0	0	0	0	0	0	0	0	0	0	0	0	0	0	0	0	0	1.29875	0	0	0	0	0	0	0	0	0	1.29875	MICROARRAY: Windhorst_37090732
RPL36	0	0	0	0	0	0	0	0	0	0	0	0	0	0	0	0	0	0	0	0	0	1.29875	0	0	0	0	0	0	0	0	0	1.29875	MICROARRAY: Windhorst_37090732
FNBP1	0	0	0	0	0	0	0	0	0	0	0	0	0	0	0	0	0	0	0	0	0	1.29875	0	0	0	0	0	0	0	0	0	1.29875	MICROARRAY: Windhorst_37090732
SPAG6	0	0	0	0	0	0	0	0	0	0	0	0	0	0	0	0	0	0	0	0	0	1.29875	0	0	0	0	0	0	0	0	0	1.29875	MICROARRAY: Windhorst_37090732
KHNYN	0	0	0	0	0	0	0	0	0	0	0	0	0	0	0	0	0	0	0	0	0	1.29875	0	0	0	0	0	0	0	0	0	1.29875	MICROARRAY: Windhorst_37090732
RABL3	0	0	0	0	0	0	0	0	0	0	0	0	0	0	0	0	0	0	0	0	0	1.29875	0	0	0	0	0	0	0	0	0	1.29875	MICROARRAY: Windhorst_37090732
ETNK1	0	0	0	0	0	0	0	0	0	0	0	0	0	0	0	0	0	0	0	0	0	1.29875	0	0	0	0	0	0	0	0	0	1.29875	MICROARRAY: Windhorst_37090732
LGALS12	0	0	0	0	0	0	0	0	0	0	0	0	0	0	0	0	0	0	0	0	0	1.29875	0	0	0	0	0	0	0	0	0	1.29875	MICROARRAY: Windhorst_37090732
GPR160	0	0	0	0	0	0	0	0	0	0	0	0	0	0	0	0	0	0	0	0	0	1.29875	0	0	0	0	0	0	0	0	0	1.29875	MICROARRAY: Windhorst_37090732
PDHA2	0	0	0	0	0	0	0	0	0	0	0	0	0	0	0	0	0	0	0	0	0	1.29875	0	0	0	0	0	0	0	0	0	1.29875	MICROARRAY: Windhorst_37090732
SPOP	0	0	0	0	0	0	0	0	0	0	0	0	0	0	0	0	0	0	0	0	0	1.29875	0	0	0	0	0	0	0	0	0	1.29875	MICROARRAY: Windhorst_37090732
OSBP	0	0	0	0	0	0	0	0	0	0	0	0	0	0	0	0	0	0	0	0	0	1.29875	0	0	0	0	0	0	0	0	0	1.29875	MICROARRAY: Windhorst_37090732
CDCA7L	0	0	0	0	0	0	0	0	0	0	0	0	0	0	0	0	0	0	0	0	0	1.29875	0	0	0	0	0	0	0	0	0	1.29875	MICROARRAY: Windhorst_37090732
TCTE3	0	0	0	0	0	0	0	0	0	0	0	0	0	0	0	0	0	0	0	0	0	1.29875	0	0	0	0	0	0	0	0	0	1.29875	MICROARRAY: Windhorst_37090732
CEBPB	0	0	0	0	0	0	0	0	0	0	0	0	0	0	0	0	0	0	0	0	0	1.29875	0	0	0	0	0	0	0	0	0	1.29875	MICROARRAY: Windhorst_37090732
FCGR3B	0	0	0	0	0	0	0	0	0	0	0	0	0	0	0	0	0	0	0	0	0	1.29875	0	0	0	0	0	0	0	0	0	1.29875	MICROARRAY: Windhorst_37090732
SPRY3	0	0	0	0	0	0	0	0	0	0	0	0	0	0	0	0	0	0	0	0	0	1.29875	0	0	0	0	0	0	0	0	0	1.29875	MICROARRAY: Windhorst_37090732
CCR8	0	0	0	0	0	0	0	0	0	0	0	0	0	0	0	0	0	0	0	0	0	1.29875	0	0	0	0	0	0	0	0	0	1.29875	MICROARRAY: Windhorst_37090732
ROBO1	0	0	0	0	0	0	0	0	0	0	0	0	0	0	0	0	0	0	0	0	0	1.29875	0	0	0	0	0	0	0	0	0	1.29875	MICROARRAY: Windhorst_37090732
HOXD9	0	0	0	0	0	0	0	0	0	0	0	0	0	0	0	0	0	0	0	0	0	1.29875	0	0	0	0	0	0	0	0	0	1.29875	MICROARRAY: Windhorst_37090732
WASL	0	0	0	0	0	0	0	0	0	0	0	0	0	0	0	0	0	0	0	0	0	1.29875	0	0	0	0	0	0	0	0	0	1.29875	MICROARRAY: Windhorst_37090732
SMAD1	0	0	0	0	0	0	0	0	0	0	0	0	0	0	0	0	0	0	0	0	0	1.29875	0	0	0	0	0	0	0	0	0	1.29875	MICROARRAY: Windhorst_37090732
PCSK6	0	0	0	0	0	0	0	0	0	0	0	0	0	0	0	0	0	0	0	0	0	1.29875	0	0	0	0	0	0	0	0	0	1.29875	MICROARRAY: Windhorst_37090732
TNFRSF1A	0	0	0	0	0	0	0	0	0	0	0	0	0	0	0	0	0	0	0	0	0	1.29875	0	0	0	0	0	0	0	0	0	1.29875	MICROARRAY: Windhorst_37090732
FLOT1	0	0	0	0	0	0	0	0	0	0	0	0	0	0	0	0	0	0	0	0	0	1.29875	0	0	0	0	0	0	0	0	0	1.29875	MICROARRAY: Windhorst_37090732
RMC1	0	0	0	0	0	0	0	0	0	0	0	0	0	0	0	0	0	0	0	0	0	1.29875	0	0	0	0	0	0	0	0	0	1.29875	MICROARRAY: Windhorst_37090732
TMEM208	0	0	0	0	0	0	0	0	0	0	0	0	0	0	0	0	0	0	0	0	0	1.29875	0	0	0	0	0	0	0	0	0	1.29875	MICROARRAY: Windhorst_37090732
EHHADH	0	0	0	0	0	0	0	0	0	0	0	0	0	0	0	0	0	0	0	0	0	1.29875	0	0	0	0	0	0	0	0	0	1.29875	MICROARRAY: Windhorst_37090732
MCC	0	0	0	0	0	0	0	0	0	0	0	0	0	0	0	0	0	0	0	0	0	1.29875	0	0	0	0	0	0	0	0	0	1.29875	MICROARRAY: Windhorst_37090732
ZHX1	0	0	0	0	0	0	0	0	0	0	0	0	0	0	0	0	0	0	0	0	0	1.29875	0	0	0	0	0	0	0	0	0	1.29875	MICROARRAY: Windhorst_37090732
MAOB	0	0	0	0	0	0	0	0	0	0	0	0	0	0	0	0	0	0	0	0	0	1.29875	0	0	0	0	0	0	0	0	0	1.29875	MICROARRAY: Windhorst_37090732
SLC7A8	0	0	0	0	0	0	0	0	0	0	0	0	0	0	0	0	0	0	0	0	0	1.29875	0	0	0	0	0	0	0	0	0	1.29875	MICROARRAY: Windhorst_37090732
RPL17	0	0	0	0	0	0	0	0	0	0	0	0	0	0	0	0	0	0	0	0	0	1.29875	0	0	0	0	0	0	0	0	0	1.29875	MICROARRAY: Windhorst_37090732
MCAT	0	0	0	0	0	0	0	0	0	0	0	0	0	0	0	0	0	0	0	0	0	1.29875	0	0	0	0	0	0	0	0	0	1.29875	MICROARRAY: Windhorst_37090732
PCMT1	0	0	0	0	0	0	0	0	0	0	0	0	0	0	0	0	0	0	0	0	0	1.29875	0	0	0	0	0	0	0	0	0	1.29875	MICROARRAY: Windhorst_37090732
PRR13	0	0	0	0	0	0	0	0	0	0	0	0	0	0	0	0	0	0	0	0	0	1.29875	0	0	0	0	0	0	0	0	0	1.29875	MICROARRAY: Windhorst_37090732
DHRS2	0	0	0	0	0	0	0	0	0	0	0	0	0	0	0	0	0	0	0	0	0	1.29875	0	0	0	0	0	0	0	0	0	1.29875	MICROARRAY: Windhorst_37090732
BEX2	0	0	0	0	0	0	0	0	0	0	0	0	0	0	0	0	0	0	0	0	0	1.29875	0	0	0	0	0	0	0	0	0	1.29875	MICROARRAY: Windhorst_37090732
ABCC8	0	0	0	0	0	0	0	0	0	0	0	0	0	0	0	0	0	0	0	0	0	1.29875	0	0	0	0	0	0	0	0	0	1.29875	MICROARRAY: Windhorst_37090732
GNAO1	0	0	0	0	0	0	0	0	0	0	0	0	0	0	0	0	0	0	0	0	0	1.29875	0	0	0	0	0	0	0	0	0	1.29875	MICROARRAY: Windhorst_37090732
RRN3	0	0	0	0	0	0	0	0	0	0	0	0	0	0	0	0	0	0	0	0	0	1.29875	0	0	0	0	0	0	0	0	0	1.29875	MICROARRAY: Windhorst_37090732
CTDSP2	0	0	0	0	0	0	0	0	0	0	0	0	0	0	0	0	0	0	0	0	0	1.29875	0	0	0	0	0	0	0	0	0	1.29875	MICROARRAY: Windhorst_37090732
SLC34A1	0	0	0	0	0	0	0	0	0	0	0	0	0	0	0	0	0	0	0	0	0	1.29875	0	0	0	0	0	0	0	0	0	1.29875	MICROARRAY: Windhorst_37090732
PRTN3	0	0	0	0	0	0	0	0	0	0	0	0	0	0	0	0	0	0	0	0	0	1.29875	0	0	0	0	0	0	0	0	0	1.29875	MICROARRAY: Windhorst_37090732
MX1	0	0	0	0	0	0	0	0	0	0	0	0	0	0	0	0	0	0	0	0	0	1.29875	0	0	0	0	0	0	0	0	0	1.29875	MICROARRAY: Windhorst_37090732
CELSR3	0	0	0	0	0	0	0	0	0	0	0	0	0	0	0	0	0	0	0	0	0	1.29875	0	0	0	0	0	0	0	0	0	1.29875	MICROARRAY: Windhorst_37090732
CFI	0	0	0	0	0	0	0	0	0	0	0	0	0	0	0	0	0	0	0	0	0	1.29875	0	0	0	0	0	0	0	0	0	1.29875	MICROARRAY: Windhorst_37090732
ZNF157	0	0	0	0	0	0	0	0	0	0	0	0	0	0	0	0	0	0	0	0	0	1.29875	0	0	0	0	0	0	0	0	0	1.29875	MICROARRAY: Windhorst_37090732
DHX15	0	0	0	0	0	0	0	0	0	0	0	0	0	0	0	0	0	0	0	0	0	1.29875	0	0	0	0	0	0	0	0	0	1.29875	MICROARRAY: Windhorst_37090732
BID	0	0	0	0	0	0	0	0	0	0	0	0	0	0	0	0	0	0	0	0	0	1.29875	0	0	0	0	0	0	0	0	0	1.29875	MICROARRAY: Windhorst_37090732
HLA-G	0	0	0	0	0	0	0	0	0	0	0	0	0	0	0	0	0	0	0	0	0	1.29875	0	0	0	0	0	0	0	0	0	1.29875	MICROARRAY: Windhorst_37090732
DHX32	0	0	0	0	0	0	0	0	0	0	0	0	0	0	0	0	0	0	0	0	0	1.29875	0	0	0	0	0	0	0	0	0	1.29875	MICROARRAY: Windhorst_37090732
CXCL9	0	0	0	0	0	0	0	0	0	0	0	0	0	0	0	0	0	0	0	0	0	1.29875	0	0	0	0	0	0	0	0	0	1.29875	MICROARRAY: Windhorst_37090732
TMBIM1	0	0	0	0	0	0	0	0	0	0	0	0	0	0	0	0	0	0	0	0	0	1.29875	0	0	0	0	0	0	0	0	0	1.29875	MICROARRAY: Windhorst_37090732
MMP7	0	0	0	0	0	0	0	0	0	0	0	0	0	0	0	0	0	0	0	0	0	1.29875	0	0	0	0	0	0	0	0	0	1.29875	MICROARRAY: Windhorst_37090732
TLR3	0	0	0	0	0	0	0	0	0	0	0	0	0	0	0	0	0	0	0	0	0	1.29875	0	0	0	0	0	0	0	0	0	1.29875	MICROARRAY: Windhorst_37090732
AHCYL1	0	0	0	0	0	0	0	0	0	0	0	0	0	0	0	0	0	0	0	0	0	1.29875	0	0	0	0	0	0	0	0	0	1.29875	MICROARRAY: Windhorst_37090732
ZNF395	0	0	0	0	0	0	0	0	0	0	0	0	0	0	0	0	0	0	0	0	0	1.29875	0	0	0	0	0	0	0	0	0	1.29875	MICROARRAY: Windhorst_37090732
PRAME	0	0	0	0	0	0	0	0	0	0	0	0	0	0	0	0	0	0	0	0	0	1.29875	0	0	0	0	0	0	0	0	0	1.29875	MICROARRAY: Windhorst_37090732
LDHD	0	0	0	0	0	0	0	0	0	0	0	0	0	0	0	0	0	0	0	0	0	1.29875	0	0	0	0	0	0	0	0	0	1.29875	MICROARRAY: Windhorst_37090732
DUSP8	0	0	0	0	0	0	0	0	0	0	0	0	0	0	0	0	0	0	0	0	0	1.29875	0	0	0	0	0	0	0	0	0	1.29875	MICROARRAY: Windhorst_37090732
LAT	0	0	0	0	0	0	0	0	0	0	0	0	0	0	0	0	0	0	0	0	0	1.29875	0	0	0	0	0	0	0	0	0	1.29875	MICROARRAY: Windhorst_37090732
DEPTOR	0	0	0	0	0	0	0	0	0	0	0	0	0	0	0	0	0	0	0	0	0	1.29875	0	0	0	0	0	0	0	0	0	1.29875	MICROARRAY: Windhorst_37090732
OR2S2	0	0	0	0	0	0	0	0	0	0	0	0	0	0	0	0	0	0	0	0	0	1.29875	0	0	0	0	0	0	0	0	0	1.29875	MICROARRAY: Windhorst_37090732
KIF22	0	0	0	0	0	0	0	0	0	0	0	0	0	0	0	0	0	0	0	0	0	1.29875	0	0	0	0	0	0	0	0	0	1.29875	MICROARRAY: Windhorst_37090732
MRVI1	0	0	0	0	0	0	0	0	0	0	0	0	0	0	0	0	0	0	0	0	0	1.29875	0	0	0	0	0	0	0	0	0	1.29875	MICROARRAY: Windhorst_37090732
DIO3	0	0	0	0	0	0	0	0	0	0	0	0	0	0	0	0	0	0	0	0	0	1.29875	0	0	0	0	0	0	0	0	0	1.29875	MICROARRAY: Windhorst_37090732
CERK	0	0	0	0	0	0	0	0	0	0	0	0	0	0	0	0	0	0	0	0	0	1.29875	0	0	0	0	0	0	0	0	0	1.29875	MICROARRAY: Windhorst_37090732
STAT2	0	0	0	0	0	0	0	0	0	0	0	0	0	0	0	0	0	0	0	0	0	1.29875	0	0	0	0	0	0	0	0	0	1.29875	MICROARRAY: Windhorst_37090732
PROC	0	0	0	0	0	0	0	0	0	0	0	0	0	0	0	0	0	0	0	0	0	1.29875	0	0	0	0	0	0	0	0	0	1.29875	MICROARRAY: Windhorst_37090732
DNAJC12	0	0	0	0	0	0	0	0	0	0	0	0	0	0	0	0	0	0	0	0	0	1.29875	0	0	0	0	0	0	0	0	0	1.29875	MICROARRAY: Windhorst_37090732
ANO3	0	0	0	0	0	0	0	0	0	0	0	0	0	0	0	0	0	0	0	0	0	1.29875	0	0	0	0	0	0	0	0	0	1.29875	MICROARRAY: Windhorst_37090732
ABCB11	0	0	0	0	0	0	0	0	0	0	0	0	0	0	0	0	0	0	0	0	0	1.29875	0	0	0	0	0	0	0	0	0	1.29875	MICROARRAY: Windhorst_37090732
SLC29A1	0	0	0	0	0	0	0	0	0	0	0	0	0	0	0	0	0	0	0	0	0	1.29875	0	0	0	0	0	0	0	0	0	1.29875	MICROARRAY: Windhorst_37090732
IGSF9B	0	0	0	0	0	0	0	0	0	0	0	0	0	0	0	0	0	0	0	0	0	1.29875	0	0	0	0	0	0	0	0	0	1.29875	MICROARRAY: Windhorst_37090732
CLCN5	0	0	0	0	0	0	0	0	0	0	0	0	0	0	0	0	0	0	0	0	0	1.29875	0	0	0	0	0	0	0	0	0	1.29875	MICROARRAY: Windhorst_37090732
KIAA1109	0	0	0	0	0	0	0	0	0	0	0	0	0	0	0	0	0	0	0	0	0	1.29875	0	0	0	0	0	0	0	0	0	1.29875	MICROARRAY: Windhorst_37090732
FAM102A	0	0	0	0	0	0	0	0	0	0	0	0	0	0	0	0	0	0	0	0	0	1.29875	0	0	0	0	0	0	0	0	0	1.29875	MICROARRAY: Windhorst_37090732
ASGR1	0	0	0	0	0	0	0	0	0	0	0	0	0	0	0	0	0	0	0	0	0	1.29875	0	0	0	0	0	0	0	0	0	1.29875	MICROARRAY: Windhorst_37090732
CST4	0	0	0	0	0	0	0	0	0	0	0	0	0	0	0	0	0	0	0	0	0	1.29875	0	0	0	0	0	0	0	0	0	1.29875	MICROARRAY: Windhorst_37090732
TECPR1	0	0	0	0	0	0	0	0	0	0	0	0	0	0	0	0	0	0	0	0	0	1.29875	0	0	0	0	0	0	0	0	0	1.29875	MICROARRAY: Windhorst_37090732
TNFRSF10C	0	0	0	0	0	0	0	0	0	0	0	0	0	0	0	0	0	0	0	0	0	1.29875	0	0	0	0	0	0	0	0	0	1.29875	MICROARRAY: Windhorst_37090732
SOAT2	0	0	0	0	0	0	0	0	0	0	0	0	0	0	0	0	0	0	0	0	0	1.29875	0	0	0	0	0	0	0	0	0	1.29875	MICROARRAY: Windhorst_37090732
MAPK8IP2	0	0	0	0	0	0	0	0	0	0	0	0	0	0	0	0	0	0	0	0	0	1.29875	0	0	0	0	0	0	0	0	0	1.29875	MICROARRAY: Windhorst_37090732
MALL	0	0	0	0	0	0	0	0	0	0	0	0	0	0	0	0	0	0	0	0	0	1.29875	0	0	0	0	0	0	0	0	0	1.29875	MICROARRAY: Windhorst_37090732
ZEB1	0	0	0	0	0	0	0	0	0	0	0	0	0	0	0	0	0	0	0	0	0	1.29875	0	0	0	0	0	0	0	0	0	1.29875	MICROARRAY: Windhorst_37090732
POLD2	0	0	0	0	0	0	0	0	0	0	0	0	0	0	0	0	0	0	0	0	0	1.29875	0	0	0	0	0	0	0	0	0	1.29875	MICROARRAY: Windhorst_37090732
GRIA3	0	0	0	0	0	0	0	0	0	0	0	0	0	0	0	0	0	0	0	0	0	1.29875	0	0	0	0	0	0	0	0	0	1.29875	MICROARRAY: Windhorst_37090732
SLC25A3	0	0	0	0	0	0	0	0	0	0	0	0	0	0	0	0	0	0	0	0	0	1.29875	0	0	0	0	0	0	0	0	0	1.29875	MICROARRAY: Windhorst_37090732
CAT	0	0	0	0	0	0	0	0	0	0	0	0	0	0	0	0	0	0	0	0	0	1.29875	0	0	0	0	0	0	0	0	0	1.29875	MICROARRAY: Windhorst_37090732
ACTR6	0	0	0	0	0	0	0	0	0	0	0	0	0	0	0	0	0	0	0	0	0	1.29875	0	0	0	0	0	0	0	0	0	1.29875	MICROARRAY: Windhorst_37090732
FBXL2	0	0	0	0	0	0	0	0	0	0	0	0	0	0	0	0	0	0	0	0	0	1.29875	0	0	0	0	0	0	0	0	0	1.29875	MICROARRAY: Windhorst_37090732
TMED1	0	0	0	0	0	0	0	0	0	0	0	0	0	0	0	0	0	0	0	0	0	1.29875	0	0	0	0	0	0	0	0	0	1.29875	MICROARRAY: Windhorst_37090732
H2AP	0	0	0	0	0	0	0	0	0	0	0	0	0	0	0	0	0	0	0	0	0	1.29875	0	0	0	0	0	0	0	0	0	1.29875	MICROARRAY: Windhorst_37090732
SCML1	0	0	0	0	0	0	0	0	0	0	0	0	0	0	0	0	0	0	0	0	0	1.29875	0	0	0	0	0	0	0	0	0	1.29875	MICROARRAY: Windhorst_37090732
FBXO3	0	0	0	0	0	0	0	0	0	0	0	0	0	0	0	0	0	0	0	0	0	1.29875	0	0	0	0	0	0	0	0	0	1.29875	MICROARRAY: Windhorst_37090732
SLC2A11	0	0	0	0	0	0	0	0	0	0	0	0	0	0	0	0	0	0	0	0	0	1.29875	0	0	0	0	0	0	0	0	0	1.29875	MICROARRAY: Windhorst_37090732
NUP210	0	0	0	0	0	0	0	0	0	0	0	0	0	0	0	0	0	0	0	0	0	1.29875	0	0	0	0	0	0	0	0	0	1.29875	MICROARRAY: Windhorst_37090732
VPS4A	0	0	0	0	0	0	0	0	0	1.29872	0	0	0	0	0	0	0	0	0	0	0	0	0	0	0	0	0	0	0	0	0	1.29872	MASS_SPEC: Ahmed_37839510
PCDD6	0	0	0	0	0	0	0	0	0	1.29872	0	0	0	0	0	0	0	0	0	0	0	0	0	0	0	0	0	0	0	0	0	1.29872	MASS_SPEC: Ahmed_37839510
ECPAS	0	0	0	0	0	0	0	0	0	1.29872	0	0	0	0	0	0	0	0	0	0	0	0	0	0	0	0	0	0	0	0	0	1.29872	MASS_SPEC: Ahmed_37839510
NAPG	0	0	0	0	0	0	0	0	0	1.29872	0	0	0	0	0	0	0	0	0	0	0	0	0	0	0	0	0	0	0	0	0	1.29872	MASS_SPEC: Ahmed_37839510
PFKB2	0	0	0	0	0	0	0	0	0	1.29872	0	0	0	0	0	0	0	0	0	0	0	0	0	0	0	0	0	0	0	0	0	1.29872	MASS_SPEC: Ahmed_37839510
ANXA1	0	0	0	0	0	0	0	0	0	1.29872	0	0	0	0	0	0	0	0	0	0	0	0	0	0	0	0	0	0	0	0	0	1.29872	MASS_SPEC: Ahmed_37839510
RAB10	0	0	0	0	0	0	0	0	0	1.29872	0	0	0	0	0	0	0	0	0	0	0	0	0	0	0	0	0	0	0	0	0	1.29872	MASS_SPEC: Ahmed_37839510
ANXA8	0	0	0	0	0	0	0	0	0	1.29872	0	0	0	0	0	0	0	0	0	0	0	0	0	0	0	0	0	0	0	0	0	1.29872	MASS_SPEC: Ahmed_37839510
CTBP1	0	0	0	0	0	0	0	0	0	1.29872	0	0	0	0	0	0	0	0	0	0	0	0	0	0	0	0	0	0	0	0	0	1.29872	MASS_SPEC: Ahmed_37839510
PPP4R1	0	0	0	0	0	0	0	0	0	1.29872	0	0	0	0	0	0	0	0	0	0	0	0	0	0	0	0	0	0	0	0	0	1.29872	MASS_SPEC: Ahmed_37839510
PLS1	0	0	0	0	0	0	0	0	0	1.29872	0	0	0	0	0	0	0	0	0	0	0	0	0	0	0	0	0	0	0	0	0	1.29872	MASS_SPEC: Ahmed_37839510
CAND1	0	0	0	0	0	0	0	0	0	1.29872	0	0	0	0	0	0	0	0	0	0	0	0	0	0	0	0	0	0	0	0	0	1.29872	MASS_SPEC: Ahmed_37839510
IGKV3D-20	0	0	0	0	0	0	0	0	0	1.29872	0	0	0	0	0	0	0	0	0	0	0	0	0	0	0	0	0	0	0	0	0	1.29872	MASS_SPEC: Ahmed_37839510
SORD	0	0	0	0	0	0	0	0	0	1.29872	0	0	0	0	0	0	0	0	0	0	0	0	0	0	0	0	0	0	0	0	0	1.29872	MASS_SPEC: Ahmed_37839510
IGHA2	0	0	0	0	0	0	0	0	0	1.29872	0	0	0	0	0	0	0	0	0	0	0	0	0	0	0	0	0	0	0	0	0	1.29872	MASS_SPEC: Ahmed_37839510
GALNT7	0	0	0	0	0	0	0	0	0	1.29872	0	0	0	0	0	0	0	0	0	0	0	0	0	0	0	0	0	0	0	0	0	1.29872	MASS_SPEC: Ahmed_37839510
IGKV-20	0	0	0	0	0	0	0	0	0	1.29872	0	0	0	0	0	0	0	0	0	0	0	0	0	0	0	0	0	0	0	0	0	1.29872	MASS_SPEC: Ahmed_37839510
GMPR2	0	0	0	0	0	0	0	0	0	1.29872	0	0	0	0	0	0	0	0	0	0	0	0	0	0	0	0	0	0	0	0	0	1.29872	MASS_SPEC: Ahmed_37839510
CPNE1	0	0	0	0	0	0	0	0	0	1.29872	0	0	0	0	0	0	0	0	0	0	0	0	0	0	0	0	0	0	0	0	0	1.29872	MASS_SPEC: Ahmed_37839510
TKT	0	0	0	0	0	0	0	0	0	1.29872	0	0	0	0	0	0	0	0	0	0	0	0	0	0	0	0	0	0	0	0	0	1.29872	MASS_SPEC: Ahmed_37839510
BPI	0	0	0	0	0	0	0	0	0	1.29872	0	0	0	0	0	0	0	0	0	0	0	0	0	0	0	0	0	0	0	0	0	1.29872	MASS_SPEC: Ahmed_37839510
CSTA	0	0	0	0	0	0	0	0	0	1.29872	0	0	0	0	0	0	0	0	0	0	0	0	0	0	0	0	0	0	0	0	0	1.29872	MASS_SPEC: Ahmed_37839510
LYZ	0	0	0	0	0	0	0	0	0	1.29872	0	0	0	0	0	0	0	0	0	0	0	0	0	0	0	0	0	0	0	0	0	1.29872	MASS_SPEC: Ahmed_37839510
TARS3	0	0	0	0	0	0	0	0	0	0	0	0	0	0	0	0	0	0	0	0	0	0	0	0	0	0	0	0	1.29866	0	0	1.29866	RNASEQ: Yuon_chou_37507442_deg_cord
FYN	0	0	0	0	0	0	0	0	0	0	0	0	0	0	0	0	0	0	0	0	0	0	0	0	0	0	0	0	1.25016	1.29865	0	1.29865	RNASEQ: Yuon_chou_37507442_deg_day14
CLEC10A	0	0	0	0	0	0	0	0	0	0	0	0	0	0	0	0	0	0	0	0	0	0	0	0	0	0	0	0	0	1.29844	0	1.29844	RNASEQ: Yuon_chou_37507442_deg_day14
ATP1B2	0	0	0	0	0	0	0	0	0	0	0	0	0	0	0	0	0	0	0	0	0	0	0	0	0	0	0	0	1.24495	1.29823	0	1.29823	RNASEQ: Yuon_chou_37507442_deg_day14
MAGEH1	0	0	0	0	0	0	0	0	0	0	0	0	0	0	0	0	0	0	0	0	0	0	0	0	0	0	0	0	1.29804	0	0	1.29804	RNASEQ: Yuon_chou_37507442_deg_cord
CCDC134	0	0	0	0	0	0	0	0	0	0	0	0	0	0	0	0	0	0	0	0	0	0	0	0	0	0	0	0	0	1.29802	0	1.29802	RNASEQ: Yuon_chou_37507442_deg_day14
VWCE	0	0	0	0	0	0	0	0	0	0	0	0	0	0	0	0	0	0	0	0	0	0	0	0	0	0	0	0	0	1.29781	0	1.29781	RNASEQ: Yuon_chou_37507442_deg_day14
CFAP70	0	0	0	0	0	0	0	0	0	0	0	0	0	0	0	0	0	0	0	0	0	0	0	0	0	0	0	0	0	1.2976	0	1.2976	RNASEQ: Yuon_chou_37507442_deg_day14
CFAP298	0	0	0	0	0	0	0	0	0	0	0	0	0	0	0	0	0	0	0	0	0	0	0	0	0	0	0	0	0	1.2974	0	1.2974	RNASEQ: Yuon_chou_37507442_deg_day14
LYRM2	0	0	0	0	0	0	0	0	0	0	0	0	0	0	0	0	0	0	0	0	0	0	0	0	0	0	0	1.29699	0	0	0	1.29699	RNASEQ: Yuon_chou_37507442_cpg_day28
ATP5MF	0	0	0	0	0	0	0	0	0	0	0	0	0	0	0	0	0	0	0	0	0	0	0	0	0	0	0	0	0	1.29698	0	1.29698	RNASEQ: Yuon_chou_37507442_deg_day14
GATA6	0	0	0	0	0	0	0	0	0	0	0	0	0	0	0	0	0	0	0	0	0	0	0	0	0	0	0	0	1.29682	0	0	1.29682	RNASEQ: Yuon_chou_37507442_deg_cord
RN7SL444P	0	0	0	0	0	0	0	0	0	0	0	0	0	0	0	0	0	0	0	0	0	0	0	0	0	0	0	0	0	1.29678	0	1.29678	RNASEQ: Yuon_chou_37507442_deg_day14
HMGXB4	0	0	0	0	0	0	0	0	0	0	0	0	0	0	0	0	0	0	0	0	0	0	0	0	0	0	0	0	1.22936	1.29637	0	1.29637	RNASEQ: Yuon_chou_37507442_deg_day14
SRGAP2B	0	0	0	0	0	0	0	0	0	0	0	0	0	0	0	0	0	0	0	0	0	0	0	0	0	0	0	0	1.29623	0	0	1.29623	RNASEQ: Yuon_chou_37507442_deg_cord
NRIR	0	0	0	0	0	0	0	0	0	0	0	0	0	0	0	0	0	0	0	0	0	0	0	0	0	0	1.16583	0	0	1.29617	0	1.29617	RNASEQ: Yuon_chou_37507442_deg_day14
PHF7	0	0	0	0	0	0	0	0	0	0	0	0	0	0	0	0	0	0	0	0	0	0	0	0	0	0	0	0	0	1.29597	0	1.29597	RNASEQ: Yuon_chou_37507442_deg_day14
H4C12	0	0	0	0	0	0	0	0	0	0	0	0	0	0	0	0	0	0	0	0	0	0	0	0	0	0	0	0	0	1.29577	0	1.29577	RNASEQ: Yuon_chou_37507442_deg_day14
EPHA1	0	0	0	0	0	0	0	0	0	0	0	0	0	0	0	0	0	0	0	0	0	0	0	0	0	0	0	0	1.29564	0	0	1.29564	RNASEQ: Yuon_chou_37507442_deg_cord
SETD6	0	0	0	0	0	0	0	0	0	0	0	0	0	0	0	0	0	0	0	0	0	0	0	0	0	0	0	0	0	1.29537	0	1.29537	RNASEQ: Yuon_chou_37507442_deg_day14
AC073210.3	0	0	0	0	0	0	0	0	0	0	0	0	0	0	0	0	0	0	0	0	0	0	0	0	0	0	0	0	0	1.29517	0	1.29517	RNASEQ: Yuon_chou_37507442_deg_day14
GLI3	0	0	0	0	0	0	0	0	0	0	0	0	0	0	0	0	0	0	0	0	0	0	0	0	0	0	1.16267	0	1.29505	0	0	1.29505	RNASEQ: Yuon_chou_37507442_deg_cord
RN7SL630P	0	0	0	0	0	0	0	0	0	0	0	0	0	0	0	0	0	0	0	0	0	0	0	0	0	0	0	0	0	1.29477	0	1.29477	RNASEQ: Yuon_chou_37507442_deg_day14
IFITM1	0	0	0	0	0	0	0	0	0	0	0	0	0	0	0	0	0	0	0	0	0	0	0	0	0	0	0	0	1.27437	1.29457	0	1.29457	RNASEQ: Yuon_chou_37507442_deg_day14
ATF3	0	0	0	0	0	0	0	0	0	0	0	0	0	0	0	0	0	0	0	0	0	0	0	0	0	0	0	0	1.29447	0	0	1.29447	RNASEQ: Yuon_chou_37507442_deg_cord
HOXB6	0	0	0	0	0	0	0	0	0	0	0	0	0	0	0	0	0	0	0	0	0	0	0	0	0	0	0	1.29439	0	0	0	1.29439	RNASEQ: Yuon_chou_37507442_cpg_day28
ZIK1	0	0	0	0	0	0	0	0	0	0	0	0	0	0	0	0	0	0	0	0	0	0	0	0	0	0	0	0	0	1.29438	0	1.29438	RNASEQ: Yuon_chou_37507442_deg_day14
MOSPD3	0	0	0	0	0	0	0	0	0	0	0	0	0	0	0	0	0	0	0	0	0	0	0	0	0	0	0	0	0	1.29418	0	1.29418	RNASEQ: Yuon_chou_37507442_deg_day14
CREB3L2	0	0	0	0	0	0	0	0	0	0	0	0	0	0	0	0	0	0	0	0	0	0	0	0	0	0	0	0	0	1.29398	0	1.29398	RNASEQ: Yuon_chou_37507442_deg_day14
ROM1	0	0	0	0	0	0	0	0	0	0	0	0	0	0	0	0	0	0	0	0	0	0	0	0	0	0	0	0	1.2939	0	0	1.2939	RNASEQ: Yuon_chou_37507442_deg_cord
ESPL1	0	0	0	0	0	0	0	0	0	0	0	0	0	0	0	0	0	0	0	0	0	0	0	0	0	0	0	0	0	1.29379	0	1.29379	RNASEQ: Yuon_chou_37507442_deg_day14
CPPED1	0	0	0	0	0	0	0	0	0	0	0	0	0	0	0	0	0	0	0	0	0	0	0	0	0	0	0	0	0	1.2934	0	1.2934	RNASEQ: Yuon_chou_37507442_deg_day14
NFKBIL1	0	0	0	0	0	0	0	0	0	0	0	0	0	0	0	0	0	0	0	0	0	0	0	0	0	0	0	0	1.29333	0	0	1.29333	RNASEQ: Yuon_chou_37507442_deg_cord
CHMP5	0	0	0	0	0	0	0	0	0	0	0	0	0	0	0	0	0	0	0	0	0	0	0	0	0	0	0	0	0	1.29321	0	1.29321	RNASEQ: Yuon_chou_37507442_deg_day14
AL117379.1	0	0	0	0	0	0	0	0	0	0	0	0	0	0	0	0	0	0	0	0	0	0	0	0	0	0	0	0	0	1.29302	0	1.29302	RNASEQ: Yuon_chou_37507442_deg_day14
FAIM	0	0	0	0	0	0	0	0	0	0	0	0	0	0	0	0	0	0	0	0	0	0	0	0	0	0	0	0	1.29277	0	0	1.29277	RNASEQ: Yuon_chou_37507442_deg_cord
USP54	0	0	0	0	0	0	0	0	0	0	0	0	0	0	0	0	0	0	0	0	0	0	0	0	0	0	0	0	0	1.29244	0	1.29244	RNASEQ: Yuon_chou_37507442_deg_day14
ZBTB8OS	0	0	0	0	0	0	0	0	0	0	0	0	0	0	0	0	0	0	0	0	0	0	0	0	0	0	0	0	0	1.29225	0	1.29225	RNASEQ: Yuon_chou_37507442_deg_day14
FSTL3	0	0	0	0	0	0	0	0	0	0	0	0	0	0	0	0	0	0	0	0	0	0	0	0	0	0	0	0	1.29222	0	0	1.29222	RNASEQ: Yuon_chou_37507442_deg_cord
RPUSD2	0	0	0	0	0	0	0	0	0	0	0	0	0	0	0	0	0	0	0	0	0	0	0	0	0	0	0	0	1.21462	1.29206	0	1.29206	RNASEQ: Yuon_chou_37507442_deg_day14
H3C3	0	0	0	0	0	0	0	0	0	0	0	0	0	0	0	0	0	0	0	0	0	0	0	0	0	0	0	0	0	1.29188	0	1.29188	RNASEQ: Yuon_chou_37507442_deg_day14
AP1B1	0	0	0	0	0	0	0	0	0	0	0	0	0	0	0	0	0	0	0	0	0	0	0	0	0	0	0	1.29183	0	0	0	1.29183	RNASEQ: Yuon_chou_37507442_cpg_day28
RN7SL396P	0	0	0	0	0	0	0	0	0	0	0	0	0	0	0	0	0	0	0	0	0	0	0	0	0	0	0	0	0	1.29169	0	1.29169	RNASEQ: Yuon_chou_37507442_deg_day14
AC022916.1	0	0	0	0	0	0	0	0	0	0	0	0	0	0	0	0	0	0	0	0	0	0	0	0	0	0	0	0	1.29167	0	0	1.29167	RNASEQ: Yuon_chou_37507442_deg_cord
CPVL	0	0	0	0	0	0	0	0	0	0	0	0	0	0	0	0	0	0	0	0	0	0	0	0	0	0	0	0	0	1.2915	0	1.2915	RNASEQ: Yuon_chou_37507442_deg_day14
PLCL1	0	0	0	0	0	0	0	0	0	0	0	0	0	0	0	0	0	0	0	0	0	0	0	0	0	0	1.16206	1.14578	1.21836	1.29131	0	1.29131	RNASEQ: Yuon_chou_37507442_deg_day14
NUAK1	0	0	0	0	0	1.29131	0	0	0	0	0	0	0	0	0	0	0	0	0	0	0	0	0	0	0	0	0	0	0	0	0	1.29131	GWAS: Ambalavanan_25449221
RPL3P4	0	0	0	0	0	0	0	0	0	0	0	0	0	0	0	0	0	0	0	0	0	0	0	0	0	0	0	0	1.29113	0	0	1.29113	RNASEQ: Yuon_chou_37507442_deg_cord
RN7SL3	0	0	0	0	0	0	0	0	0	0	0	0	0	0	0	0	0	0	0	0	0	0	0	0	0	0	0	0	0	1.29113	0	1.29113	RNASEQ: Yuon_chou_37507442_deg_day14
IFT122	0	0	0	0	0	0	0	0	0	0	0	0	0	0	0	0	0	0	0	0	0	0	0	0	0	0	0	0	0	1.29094	0	1.29094	RNASEQ: Yuon_chou_37507442_deg_day14
PTGER4	0	0	0	0	0	0	0	0	0	0	0	0	0	0	0	0	0	0	0	0	0	0	0	0	0	0	0	0	0	1.29076	0	1.29076	RNASEQ: Yuon_chou_37507442_deg_day14
TTC8	0	0	0	0	0	0	0	0	0	0	0	0	0	0	0	0	0	0	0	0	0	0	0	0	0	0	0	0	1.2906	0	0	1.2906	RNASEQ: Yuon_chou_37507442_deg_cord
RN7SL617P	0	0	0	0	0	0	0	0	0	0	0	0	0	0	0	0	0	0	0	0	0	0	0	0	0	0	0	0	0	1.29039	0	1.29039	RNASEQ: Yuon_chou_37507442_deg_day14
H4C13	0	0	0	0	0	0	0	0	0	0	0	0	0	0	0	0	0	0	0	0	0	0	0	0	0	0	0	0	0	1.29021	0	1.29021	RNASEQ: Yuon_chou_37507442_deg_day14
AVPR1A	0	0	0	0	0	0	0	0	0	0	0	0	0	0	0	0	0	0	0	0	0	0	0	0	0	0	0	0	1.29007	0	0	1.29007	RNASEQ: Yuon_chou_37507442_deg_cord
RN7SL735P	0	0	0	0	0	0	0	0	0	0	0	0	0	0	0	0	0	0	0	0	0	0	0	0	0	0	0	0	0	1.29002	0	1.29002	RNASEQ: Yuon_chou_37507442_deg_day14
RN7SL11P	0	0	0	0	0	0	0	0	0	0	0	0	0	0	0	0	0	0	0	0	0	0	0	0	0	0	0	0	0	1.28984	0	1.28984	RNASEQ: Yuon_chou_37507442_deg_day14
WDR41	0	0	0	0	0	0	0	0	0	0	0	0	0	0	0	0	0	0	0	0	0	0	0	0	0	0	0	0	1.28954	0	0	1.28954	RNASEQ: Yuon_chou_37507442_deg_cord
CD300LF	0	0	0	0	0	0	0	0	0	0	0	0	0	0	0	0	0	0	0	0	0	0	0	0	0	0	0	0	0	1.28948	0	1.28948	RNASEQ: Yuon_chou_37507442_deg_day14
GCAT	0	0	0	0	0	0	0	0	0	0	0	0	0	0	0	0	0	0	0	0	0	0	0	0	0	0	0	0	0	1.2893	0	1.2893	RNASEQ: Yuon_chou_37507442_deg_day14
ENSG00000288875	0	0	0	0	0	0	0	0	0	0	0	0	0	0	0	0	0	0	0	0	0	0	0	0	0	0	0	0	0	1.28912	0	1.28912	RNASEQ: Yuon_chou_37507442_deg_day14
HES6	0	0	0	0	0	0	0	0	0	0	0	0	0	0	0	0	0	0	0	0	0	0	0	0	0	0	0	0	1.28902	0	0	1.28902	RNASEQ: Yuon_chou_37507442_deg_cord
LEF1-AS1	0	0	0	0	0	0	0	0	0	0	0	0	0	0	0	0	0	0	0	0	0	0	0	0	0	0	0	0	0	1.28876	0	1.28876	RNASEQ: Yuon_chou_37507442_deg_day14
LNPK	0	0	0	0	0	0	0	0	0	0	0	0	0	0	0	0	0	0	0	0	0	0	0	0	0	0	0	0	0	1.28858	0	1.28858	RNASEQ: Yuon_chou_37507442_deg_day14
HMGN2P5	0	0	0	0	0	0	0	0	0	0	0	0	0	0	0	0	0	0	0	0	0	0	0	0	0	0	0	0	1.28851	0	0	1.28851	RNASEQ: Yuon_chou_37507442_deg_cord
TOR1A	0	0	0	0	0	0	0	0	0	0	0	0	0	0	0	0	0	0	0	0	0	0	0	0	0	0	0	0	0	1.28841	0	1.28841	RNASEQ: Yuon_chou_37507442_deg_day14
CYTOR	0	0	0	0	0	0	0	0	0	0	0	0	0	0	0	0	0	0	0	0	0	0	0	0	0	0	0	1.14363	0	1.28823	0	1.28823	RNASEQ: Yuon_chou_37507442_deg_day14
MAP3K13	0	0	0	0	0	0	0	0	0	0	0	0	0	0	0	0	0	0	0	0	0	0	0	0	0	0	0	0	0	1.28805	0	1.28805	RNASEQ: Yuon_chou_37507442_deg_day14
GPRIN3	0	0	0	0	0	0	0	0	0	0	0	0	0	0	0	0	0	0	0	0	0	0	0	0	0	0	0	0	1.288	0	0	1.288	RNASEQ: Yuon_chou_37507442_deg_cord
MT2A	0	0	0	0	0	0	0	0	0	0	0	0	0	0	0	0	0	0	0	0	0	0	0	0	0	0	0	0	0	1.28788	0	1.28788	RNASEQ: Yuon_chou_37507442_deg_day14
GMNN	0	0	0	0	0	0	0	0	0	0	0	0	0	0	0	0	0	0	0	0	0	0	0	0	0	0	0	0	0	1.2877	0	1.2877	RNASEQ: Yuon_chou_37507442_deg_day14
CIT	0	0	0	0	0	0	0	0	0	0	0	0	0	0	0	0	0	0	0	0	0	0	0	0	0	0	0	0	0	1.28753	0	1.28753	RNASEQ: Yuon_chou_37507442_deg_day14
PPP3CC	0	0	0	0	0	0	0	0	0	0	0	0	0	0	0	0	0	0	0	0	0	0	0	0	0	0	0	0	1.2875	0	0	1.2875	RNASEQ: Yuon_chou_37507442_deg_cord
PRKCQ-AS1	0	0	0	0	0	0	0	0	0	0	0	0	0	0	0	0	0	0	0	0	0	0	0	0	0	0	0	0	1.24488	1.28735	0	1.28735	RNASEQ: Yuon_chou_37507442_deg_day14
ELOCP19	0	0	0	0	0	0	0	0	0	0	0	0	0	0	0	0	0	0	0	0	0	0	0	0	0	0	0	0	0	1.28718	0	1.28718	RNASEQ: Yuon_chou_37507442_deg_day14
SMARCD3	0	0	0	0	0	0	0	0	0	0	0	0	0	0	0	0	0	0	0	0	0	0	0	0	0	0	0	0	0	1.28701	0	1.28701	RNASEQ: Yuon_chou_37507442_deg_day14
GIMAP6	0	0	0	0	0	0	0	0	0	0	0	0	0	0	0	0	0	0	0	0	0	0	0	0	0	0	0	0	1.287	0	0	1.287	RNASEQ: Yuon_chou_37507442_deg_cord
LINC01639	0	0	0	0	0	0	0	0	0	0	0	0	0	0	0	0	0	0	0	0	0	0	0	0	0	0	0	1.28685	0	0	0	1.28685	RNASEQ: Yuon_chou_37507442_cpg_day28
CNKSR2	0	0	0	0	0	0	0	0	0	0	0	0	0	0	0	0	0	0	0	0	0	0	0	0	0	0	0	0	0	1.28684	0	1.28684	RNASEQ: Yuon_chou_37507442_deg_day14
MAGED2	0	0	0	0	0	0	0	0	0	0	0	0	0	0	0	0	0	0	0	0	0	0	0	0	0	0	0	0	1.28651	0	0	1.28651	RNASEQ: Yuon_chou_37507442_deg_cord
PTTG1	0	0	0	0	0	0	0	0	0	0	0	0	0	0	0	0	0	0	0	0	0	0	0	0	0	0	0	0	0	1.28649	0	1.28649	RNASEQ: Yuon_chou_37507442_deg_day14
KCNH7	0	0	0	0	0	1.28637	0	0	0	0	0	0	0	0	0	0	0	0	0	0	0	0	0	0	0	0	0	0	0	0	0	1.28637	GWAS: Ambalavanan_25449221
NCOA7	0	0	0	0	0	0	0	0	0	0	0	0	0	0	0	0	0	0	0	0	0	0	0	0	0	0	0	0	0	1.28632	0	1.28632	RNASEQ: Yuon_chou_37507442_deg_day14
INTS12	0	0	0	0	0	0	0	0	0	0	0	0	0	0	0	0	0	0	0	0	0	0	0	0	0	0	0	0	0	1.28615	0	1.28615	RNASEQ: Yuon_chou_37507442_deg_day14
CAMK4	0	0	0	0	0	0	0	0	0	0	0	0	0	0	0	0	0	0	0	0	0	0	0	0	0	0	1.15701	0	1.21951	1.28598	0	1.28598	RNASEQ: Yuon_chou_37507442_deg_day14
CYLD-AS1	0	0	0	0	0	0	0	0	0	0	0	0	0	0	0	0	0	0	0	0	0	0	0	0	0	0	1.15283	0	0	1.28581	0	1.28581	RNASEQ: Yuon_chou_37507442_deg_day14
TRIP13	0	0	0	0	0	0	0	0	0	0	0	0	0	0	0	0	0	0	0	0	0	0	0	0	0	0	0	0	0	1.28565	0	1.28565	RNASEQ: Yuon_chou_37507442_deg_day14
PHKA1	0	0	0	0	0	0	0	0	0	0	0	0	0	0	0	0	0	0	0	0	0	0	0	0	0	0	0	0	1.28555	0	0	1.28555	RNASEQ: Yuon_chou_37507442_deg_cord
PLAC8	0	0	0	0	0	0	0	0	0	0	0	0	0	0	0	0	0	0	0	0	0	0	0	0	0	0	0	0	0	1.28548	0	1.28548	RNASEQ: Yuon_chou_37507442_deg_day14
UBALD2	0	0	0	0	0	0	0	0	0	0	0	0	0	0	0	0	0	0	0	0	0	0	0	0	0	0	0	0	0	1.28514	0	1.28514	RNASEQ: Yuon_chou_37507442_deg_day14
APOC1	0	0	0	0	0	0	0	0	0	0	0	0	0	0	0	0	0	0	0	0	0	0	0	0	0	0	0	0	1.28507	0	0	1.28507	RNASEQ: Yuon_chou_37507442_deg_cord
TOR1B	0	0	0	0	0	0	0	0	0	0	0	0	0	0	0	0	0	0	0	0	0	0	0	0	0	0	0	0	0	1.28498	0	1.28498	RNASEQ: Yuon_chou_37507442_deg_day14
RNF5	0	0	0	0	0	0	0	0	0	0	0	0	0	0	0	0	0	0	0	0	0	0	0	0	0	0	0	0	0	1.28481	0	1.28481	RNASEQ: Yuon_chou_37507442_deg_day14
TMIGD2	0	0	0	0	0	0	0	0	0	0	0	0	0	0	0	0	0	0	0	0	0	0	0	0	0	0	1.1646	0	1.2217	1.28465	0	1.28465	RNASEQ: Yuon_chou_37507442_deg_day14
ENSG00000267506	0	0	0	0	0	0	0	0	0	0	0	0	0	0	0	0	0	0	0	0	0	0	0	0	0	0	0	0	1.2846	0	0	1.2846	RNASEQ: Yuon_chou_37507442_deg_cord
WHAMMP3	0	0	0	0	0	0	0	0	0	0	0	0	0	0	0	0	0	0	0	0	0	0	0	0	0	0	0	0	0	1.28448	0	1.28448	RNASEQ: Yuon_chou_37507442_deg_day14
TBX21	0	0	0	0	0	0	0	0	0	0	0	0	0	0	0	0	0	0	0	0	0	0	0	0	0	0	0	1.28442	1.22769	0	0	1.28442	RNASEQ: Yuon_chou_37507442_cpg_day28
LINC00667	0	0	0	0	0	0	0	0	0	0	0	0	0	0	0	0	0	0	0	0	0	0	0	0	0	0	0	0	1.28414	0	0	1.28414	RNASEQ: Yuon_chou_37507442_deg_cord
GZMM	0	0	0	0	0	0	0	0	0	0	0	0	0	0	0	0	0	0	0	0	0	0	0	0	0	0	0	0	1.28368	0	0	1.28368	RNASEQ: Yuon_chou_37507442_deg_cord
ZNF587	0	0	0	0	0	0	0	0	0	0	0	0	0	0	0	0	0	0	0	0	0	0	0	0	0	0	0	1.14859	0	1.28334	0	1.28334	RNASEQ: Yuon_chou_37507442_deg_day14
DDHD2	0	0	0	0	0	0	0	0	0	0	0	0	0	0	0	0	0	0	0	0	0	0	0	0	0	0	0	0	1.28322	1.23771	0	1.28322	RNASEQ: Yuon_chou_37507442_deg_cord
TNPO1P1	0	0	0	0	0	0	0	0	0	0	0	0	0	0	0	0	0	0	0	0	0	0	0	0	0	0	0	0	0	1.28286	0	1.28286	RNASEQ: Yuon_chou_37507442_deg_day14
ANO5	0	0	0	0	0	0	0	0	0	0	0	0	0	0	0	0	0	0	0	0	0	0	0	0	0	0	0	0	1.28277	0	0	1.28277	RNASEQ: Yuon_chou_37507442_deg_cord
USP6NL	0	0	0	0	0	0	0	0	0	0	0	0	0	0	0	0	0	0	0	0	0	0	0	0	0	0	0	1.14474	0	1.2827	0	1.2827	RNASEQ: Yuon_chou_37507442_deg_day14
RN7SL230P	0	0	0	0	0	0	0	0	0	0	0	0	0	0	0	0	0	0	0	0	0	0	0	0	0	0	0	0	0	1.28254	0	1.28254	RNASEQ: Yuon_chou_37507442_deg_day14
DEPDC1B	0	0	0	0	0	0	0	0	0	0	0	0	0	0	0	0	0	0	0	0	0	0	0	0	0	0	0	0	0	1.28239	0	1.28239	RNASEQ: Yuon_chou_37507442_deg_day14
ENSG00000289424	0	0	0	0	0	0	0	0	0	0	0	0	0	0	0	0	0	0	0	0	0	0	0	0	0	0	0	0	1.28233	0	0	1.28233	RNASEQ: Yuon_chou_37507442_deg_cord
H2AC12	0	0	0	0	0	0	0	0	0	0	0	0	0	0	0	0	0	0	0	0	0	0	0	0	0	0	0	0	0	1.28223	0	1.28223	RNASEQ: Yuon_chou_37507442_deg_day14
LOC105376778	0	0	0	0	0	0	0	0	0	0	0	0	0	0	0	0	0	0	0	0	0	0	0	0	0	0	0	1.28204	0	0	0	1.28204	RNASEQ: Yuon_chou_37507442_cpg_day28
LINC02482	0	0	0	0	0	0	0	0	0	0	0	0	0	0	0	0	0	0	0	0	0	0	0	0	0	0	0	0	0	1.28191	0	1.28191	RNASEQ: Yuon_chou_37507442_deg_day14
LINC00987	0	0	0	0	0	0	0	0	0	0	0	0	0	0	0	0	0	0	0	0	0	0	0	0	0	0	0	0	1.28189	0	0	1.28189	RNASEQ: Yuon_chou_37507442_deg_cord
H2BC14	0	0	0	0	0	0	0	0	0	0	0	0	0	0	0	0	0	0	0	0	0	0	0	0	0	0	0	0	1.22069	1.2816	0	1.2816	RNASEQ: Yuon_chou_37507442_deg_day14
FNIP1	0	0	0	0	0	0	0	0	0	0	0	0	0	0	0	0	0	0	0	0	0	0	0	0	0	0	0	0	1.28145	0	0	1.28145	RNASEQ: Yuon_chou_37507442_deg_cord
GRIP1	0	0	0	0	0	1.28142	0	0	0	0	0	0	0	0	0	0	0	0	0	0	0	0	0	0	0	0	0	0	0	0	0	1.28142	GWAS: Ambalavanan_25449221
AFG1L	0	0	0	0	0	0	0	0	0	0	0	0	0	0	0	0	0	0	0	0	0	0	0	0	0	0	0	0	0	1.28129	0	1.28129	RNASEQ: Yuon_chou_37507442_deg_day14
LY6E	0	0	0	0	0	0	0	0	0	0	0	0	0	0	0	0	0	0	0	0	0	0	0	0	0	0	0	0	1.23102	1.28099	0	1.28099	RNASEQ: Yuon_chou_37507442_deg_day14
CDC6	0	0	0	0	0	0	0	0	0	0	0	0	0	0	0	0	0	0	0	0	0	0	0	0	0	0	0	0	0	1.28083	0	1.28083	RNASEQ: Yuon_chou_37507442_deg_day14
NHS	0	0	0	0	0	0	0	0	0	0	0	0	0	0	0	0	0	0	0	0	0	0	0	0	0	0	0	0	0	1.28068	0	1.28068	RNASEQ: Yuon_chou_37507442_deg_day14
PRR11	0	0	0	0	0	0	0	0	0	0	0	0	0	0	0	0	0	0	0	0	0	0	0	0	0	0	0	0	1.2806	1.27021	0	1.2806	RNASEQ: Yuon_chou_37507442_deg_cord
ZNF10	0	0	0	0	0	0	0	0	0	0	0	0	0	0	0	0	0	0	0	0	0	0	0	0	0	0	0	0	0	1.28053	0	1.28053	RNASEQ: Yuon_chou_37507442_deg_day14
ZNHIT1	0	0	0	0	0	0	0	0	0	0	0	0	0	0	0	0	0	0	0	0	0	0	0	0	0	0	0	0	0	1.28038	0	1.28038	RNASEQ: Yuon_chou_37507442_deg_day14
NSD2	0	0	0	0	0	0	0	0	0	0	0	0	0	0	0	0	0	0	0	0	0	0	0	0	0	0	0	1.14654	0	1.28022	0	1.28022	RNASEQ: Yuon_chou_37507442_deg_day14
ZSCAN26	0	0	0	0	0	0	0	0	0	0	0	0	0	0	0	0	0	0	0	0	0	0	0	0	0	0	0	0	1.28018	0	0	1.28018	RNASEQ: Yuon_chou_37507442_deg_cord
ATL1	0	0	0	0	0	0	0	0	0	0	0	0	0	0	0	0	0	0	0	0	0	0	0	0	0	0	0	0	0	1.28007	0	1.28007	RNASEQ: Yuon_chou_37507442_deg_day14
H3C8	0	0	0	0	0	0	0	0	0	0	0	0	0	0	0	0	0	0	0	0	0	0	0	0	0	0	0	0	0	1.27977	0	1.27977	RNASEQ: Yuon_chou_37507442_deg_day14
FZD10-AS1	0	0	0	0	0	0	0	0	0	0	0	0	0	0	0	0	0	0	0	0	0	0	0	0	0	0	0	1.2797	0	0	0	1.2797	RNASEQ: Yuon_chou_37507442_cpg_day28
IL16	0	0	0	0	0	0	0	0	0	0	0	0	0	0	0	0	0	0	0	0	0	0	0	0	0	0	0	0	1.23145	1.27962	0	1.27962	RNASEQ: Yuon_chou_37507442_deg_day14
FBF1	0	0	0	0	0	0	0	0	0	0	0	0	0	0	0	0	0	0	0	0	0	0	0	0	0	0	1.15527	0	1.27935	0	0	1.27935	RNASEQ: Yuon_chou_37507442_deg_cord
RELA-DT	0	0	0	0	0	0	0	0	0	0	0	0	0	0	0	0	0	0	0	0	0	0	0	0	0	0	0	0	0	1.27933	0	1.27933	RNASEQ: Yuon_chou_37507442_deg_day14
USP46	0	0	0	0	0	0	0	0	0	0	0	0	0	0	0	0	0	0	0	0	0	0	0	0	0	0	0	0	0	1.27918	0	1.27918	RNASEQ: Yuon_chou_37507442_deg_day14
WWOX	0	0	0	0	0	0	0	0	0	0	0	0	0	0	0	0	0	0	0	0	0	0	0	0	0	0	0	0	0	1.27903	0	1.27903	RNASEQ: Yuon_chou_37507442_deg_day14
CRB3	0	0	0	0	0	0	0	0	0	0	0	0	0	0	0	0	0	0	0	0	0	0	0	0	0	0	0	0	1.27894	0	0	1.27894	RNASEQ: Yuon_chou_37507442_deg_cord
SLC39A10	0	0	0	0	0	0	0	0	0	0	0	0	0	0	0	0	0	0	0	0	0	0	0	0	0	0	0	0	1.23407	1.27874	0	1.27874	RNASEQ: Yuon_chou_37507442_deg_day14
ENSG00000253924	0	0	0	0	0	0	0	0	0	0	0	0	0	0	0	0	0	0	0	0	0	0	0	0	0	0	0	0	0	1.27859	0	1.27859	RNASEQ: Yuon_chou_37507442_deg_day14
ZNF502	0	0	0	0	0	0	0	0	0	0	0	0	0	0	0	0	0	0	0	0	0	0	0	0	0	0	0	0	0	1.27844	0	1.27844	RNASEQ: Yuon_chou_37507442_deg_day14
PLK1	0	0	0	0	0	0	0	0	0	0	0	0	0	0	0	0	0	0	0	0	0	0	0	0	0	0	0	0	0	1.2783	0	1.2783	RNASEQ: Yuon_chou_37507442_deg_day14
ENSG00000228436	0	0	0	0	0	0	0	0	0	0	0	0	0	0	0	0	0	0	0	0	0	0	0	0	0	0	0	0	1.27814	0	0	1.27814	RNASEQ: Yuon_chou_37507442_deg_cord
RN7SL608P	0	0	0	0	0	0	0	0	0	0	0	0	0	0	0	0	0	0	0	0	0	0	0	0	0	0	0	0	0	1.27801	0	1.27801	RNASEQ: Yuon_chou_37507442_deg_day14
ZSCAN16-AS1	0	0	0	0	0	0	0	0	0	0	0	0	0	0	0	0	0	0	0	0	0	0	0	0	0	0	0	0	0	1.27786	0	1.27786	RNASEQ: Yuon_chou_37507442_deg_day14
NMT2	0	0	0	0	0	0	0	0	0	0	0	0	0	0	0	0	0	0	0	0	0	0	0	0	0	0	0	0	1.27774	0	0	1.27774	RNASEQ: Yuon_chou_37507442_deg_cord
ENSG00000288965	0	0	0	0	0	0	0	0	0	0	0	0	0	0	0	0	0	0	0	0	0	0	0	0	0	0	0	0	0	1.27758	0	1.27758	RNASEQ: Yuon_chou_37507442_deg_day14
LOC107987138	0	0	0	0	0	0	0	0	0	0	0	0	0	0	0	0	0	0	0	0	0	0	0	0	0	0	0	1.27739	0	0	0	1.27739	RNASEQ: Yuon_chou_37507442_cpg_day28
HELLS	0	0	0	0	0	0	0	0	0	0	0	0	0	0	0	0	0	0	0	0	0	0	0	0	0	0	0	0	1.27735	0	0	1.27735	RNASEQ: Yuon_chou_37507442_deg_cord
KDM4C	0	0	0	0	0	0	0	0	0	0	0	0	0	0	0	0	0	0	0	0	0	0	0	0	0	0	0	1.14469	0	1.27715	0	1.27715	RNASEQ: Yuon_chou_37507442_deg_day14
AP006621.1	0	0	0	0	0	0	0	0	0	0	0	0	0	0	0	0	0	0	0	0	0	0	0	0	0	0	0	0	1.27696	0	0	1.27696	RNASEQ: Yuon_chou_37507442_deg_cord
IFT20	0	0	0	0	0	0	0	0	0	0	0	0	0	0	0	0	0	0	0	0	0	0	0	0	0	0	0	0	0	1.27659	0	1.27659	RNASEQ: Yuon_chou_37507442_deg_day14
IGDCC4	0	0	0	0	0	0	0	0	0	0	0	0	0	0	0	0	0	0	0	0	0	0	0	0	0	0	0	0	1.27658	0	0	1.27658	RNASEQ: Yuon_chou_37507442_deg_cord
GALNTL6	0	0	0	0	0	1.27648	0	0	0	0	0	0	0	0	0	0	0	0	0	0	0	0	0	0	0	0	0	0	0	0	0	1.27648	GWAS: Ambalavanan_25449221
CYSTM1	0	0	0	0	0	0	0	0	0	0	0	0	0	0	0	0	0	0	0	0	0	0	0	0	0	0	0	0	0	1.27645	0	1.27645	RNASEQ: Yuon_chou_37507442_deg_day14
ENSG00000268119	0	0	0	0	0	0	0	0	0	0	0	0	0	0	0	0	0	0	0	0	0	0	0	0	0	0	0	0	1.21595	1.27631	0	1.27631	RNASEQ: Yuon_chou_37507442_deg_day14
CDC42P6	0	0	0	0	0	0	0	0	0	0	0	0	0	0	0	0	0	0	0	0	0	0	0	0	0	0	0	0	1.2762	0	0	1.2762	RNASEQ: Yuon_chou_37507442_deg_cord
CYP2R1	0	0	0	0	0	0	0	0	0	0	0	0	0	0	0	0	0	0	0	0	0	0	0	0	0	0	0	0	1.22067	1.27617	0	1.27617	RNASEQ: Yuon_chou_37507442_deg_day14
ZMYND8	0	0	0	0	0	0	0	0	0	0	0	0	0	0	0	0	0	0	0	0	0	0	0	0	0	0	0	0	0	1.27589	0	1.27589	RNASEQ: Yuon_chou_37507442_deg_day14
ZNF551	0	0	0	0	0	0	0	0	0	0	0	0	0	0	0	0	0	0	0	0	0	0	0	0	0	0	0	0	1.27583	1.27045	0	1.27583	RNASEQ: Yuon_chou_37507442_deg_cord
PDE7A	0	0	0	0	0	0	0	0	0	0	0	0	0	0	0	0	0	0	0	0	0	0	0	0	0	0	0	0	1.22703	1.27576	0	1.27576	RNASEQ: Yuon_chou_37507442_deg_day14
SEC24A	0	0	0	0	0	0	0	0	0	0	0	0	0	0	0	0	0	0	0	0	0	0	0	0	0	0	0	0	1.22089	1.27562	0	1.27562	RNASEQ: Yuon_chou_37507442_deg_day14
ZNRF1	0	0	0	0	0	0	0	0	0	0	0	0	0	0	0	0	0	0	0	0	0	0	0	0	0	0	0	0	0	1.27548	0	1.27548	RNASEQ: Yuon_chou_37507442_deg_day14
CCDC125	0	0	0	0	0	0	0	0	0	0	0	0	0	0	0	0	0	0	0	0	0	0	0	0	0	0	0	0	1.27546	0	0	1.27546	RNASEQ: Yuon_chou_37507442_deg_cord
TIAM1	0	0	0	0	0	0	0	0	0	0	0	0	0	0	0	0	0	0	0	0	0	0	0	0	0	0	1.1494	0	0	1.27521	0	1.27521	RNASEQ: Yuon_chou_37507442_deg_day14
MSX1	0	0	0	0	0	0	0	0	0	0	0	0	0	0	0	0	0	0	0	0	0	0	0	0	0	0	1.16083	1.27513	0	0	0	1.27513	RNASEQ: Yuon_chou_37507442_cpg_day28
ENSG00000289166	0	0	0	0	0	0	0	0	0	0	0	0	0	0	0	0	0	0	0	0	0	0	0	0	0	0	0	0	1.27509	0	0	1.27509	RNASEQ: Yuon_chou_37507442_deg_cord
GRK5	0	0	0	0	0	0	0	0	0	0	0	0	0	0	0	0	0	0	0	0	0	0	0	0	0	0	0	0	0	1.27507	0	1.27507	RNASEQ: Yuon_chou_37507442_deg_day14
H2BC17	0	0	0	0	0	0	0	0	0	0	0	0	0	0	0	0	0	0	0	0	0	0	0	0	0	0	0	1.14465	0	1.27494	0	1.27494	RNASEQ: Yuon_chou_37507442_deg_day14
IL15RA	0	0	0	0	0	0	0	0	0	0	0	0	0	0	0	0	0	0	0	0	0	0	0	0	0	0	0	0	0	1.2748	0	1.2748	RNASEQ: Yuon_chou_37507442_deg_day14
IFI6	0	0	0	0	0	0	0	0	0	0	0	0	0	0	0	0	0	0	0	0	0	0	0	0	0	0	0	0	0	1.27467	0	1.27467	RNASEQ: Yuon_chou_37507442_deg_day14
QRICH1	0	0	0	0	0	0	0	0	0	0	0	0	0	0	0	0	0	0	0	0	0	0	0	0	0	0	0	0	0	1.27454	0	1.27454	RNASEQ: Yuon_chou_37507442_deg_day14
POLQ	0	0	0	0	0	0	0	0	0	0	0	0	0	0	0	0	0	0	0	0	0	0	0	0	0	0	0	0	0	1.2744	0	1.2744	RNASEQ: Yuon_chou_37507442_deg_day14
SPPL3	0	0	0	0	0	0	0	0	0	0	0	0	0	0	0	0	0	0	0	0	0	0	0	0	0	0	0	0	0	1.27427	0	1.27427	RNASEQ: Yuon_chou_37507442_deg_day14
SLC22A23	0	0	0	0	0	0	0	0	0	0	0	0	0	0	0	0	0	0	0	0	0	0	0	0	0	0	0	1.14658	0	1.27414	0	1.27414	RNASEQ: Yuon_chou_37507442_deg_day14
PARP11-AS1	0	0	0	0	0	0	0	0	0	0	0	0	0	0	0	0	0	0	0	0	0	0	0	0	0	0	0	0	1.27402	0	0	1.27402	RNASEQ: Yuon_chou_37507442_deg_cord
TMEM165	0	0	0	0	0	0	0	0	0	0	0	0	0	0	0	0	0	0	0	0	0	0	0	0	0	0	0	0	0	1.274	0	1.274	RNASEQ: Yuon_chou_37507442_deg_day14
USP30	0	0	0	0	0	0	0	0	0	0	0	0	0	0	0	0	0	0	0	0	0	0	0	0	0	0	0	0	0	1.27387	0	1.27387	RNASEQ: Yuon_chou_37507442_deg_day14
TMEM241	0	0	0	0	0	0	0	0	0	0	0	0	0	0	0	0	0	0	0	0	0	0	0	0	0	0	0	0	0	1.27374	0	1.27374	RNASEQ: Yuon_chou_37507442_deg_day14
C1orf109	0	0	0	0	0	0	0	0	0	0	0	0	0	0	0	0	0	0	0	0	0	0	0	0	0	0	0	0	1.27367	0	0	1.27367	RNASEQ: Yuon_chou_37507442_deg_cord
H2BC10	0	0	0	0	0	0	0	0	0	0	0	0	0	0	0	0	0	0	0	0	0	0	0	0	0	0	0	0	1.22275	1.27361	0	1.27361	RNASEQ: Yuon_chou_37507442_deg_day14
FANCI	0	0	0	0	0	0	0	0	0	0	0	0	0	0	0	0	0	0	0	0	0	0	0	0	0	0	0	0	0	1.27348	0	1.27348	RNASEQ: Yuon_chou_37507442_deg_day14
SPSB1	0	0	0	0	0	0	0	0	0	0	0	0	0	0	0	0	0	0	0	0	0	0	0	0	0	0	1.15816	0	1.27332	0	0	1.27332	RNASEQ: Yuon_chou_37507442_deg_cord
AC134349.2	0	0	0	0	0	0	0	0	0	0	0	0	0	0	0	0	0	0	0	0	0	0	0	0	0	0	0	0	0	1.27322	0	1.27322	RNASEQ: Yuon_chou_37507442_deg_day14
MACC1	0	0	0	0	0	0	0	0	0	0	0	0	0	0	0	0	0	0	0	0	0	0	0	0	0	0	0	0	1.27298	0	0	1.27298	RNASEQ: Yuon_chou_37507442_deg_cord
RFTN1	0	0	0	0	0	0	0	0	0	0	0	0	0	0	0	0	0	0	0	0	0	0	0	0	0	0	0	0	1.2361	1.27296	0	1.27296	RNASEQ: Yuon_chou_37507442_deg_day14
KRT2	0	0	0	0	0	0	0	0	0	0	0	0	0	0	0	0	0	0	0	0	0	0	0	0	0	0	1.16423	1.27291	0	0	0	1.27291	RNASEQ: Yuon_chou_37507442_cpg_day28
IFNG-AS1	0	0	0	0	0	0	0	0	0	0	0	0	0	0	0	0	0	0	0	0	0	0	0	0	0	0	0	0	1.25744	1.27283	0	1.27283	RNASEQ: Yuon_chou_37507442_deg_day14
VOPP1	0	0	0	0	0	0	0	0	0	0	0	0	0	0	0	0	0	0	0	0	0	0	0	0	0	0	0	0	0	1.2727	0	1.2727	RNASEQ: Yuon_chou_37507442_deg_day14
BRMS1L	0	0	0	0	0	0	0	0	0	0	0	0	0	0	0	0	0	0	0	0	0	0	0	0	0	0	0	0	1.27264	0	0	1.27264	RNASEQ: Yuon_chou_37507442_deg_cord
ZNF549	0	0	0	0	0	0	0	0	0	0	0	0	0	0	0	0	0	0	0	0	0	0	0	0	0	0	0	0	0	1.27245	0	1.27245	RNASEQ: Yuon_chou_37507442_deg_day14
CD300LB	0	0	0	0	0	0	0	0	0	0	0	0	0	0	0	0	0	0	0	0	0	0	0	0	0	0	0	0	0	1.27232	0	1.27232	RNASEQ: Yuon_chou_37507442_deg_day14
GZMA	0	0	0	0	0	0	0	0	0	0	0	0	0	0	0	0	0	0	0	0	0	0	0	0	0	0	0	0	1.2723	0	0	1.2723	RNASEQ: Yuon_chou_37507442_deg_cord
GTSE1	0	0	0	0	0	0	0	0	0	0	0	0	0	0	0	0	0	0	0	0	0	0	0	0	0	0	1.16523	0	0	1.27219	0	1.27219	RNASEQ: Yuon_chou_37507442_deg_day14
ZNF229	0	0	0	0	0	0	0	0	0	0	0	0	0	0	0	0	0	0	0	0	0	0	0	0	0	0	0	0	0	1.27194	0	1.27194	RNASEQ: Yuon_chou_37507442_deg_day14
PTPRK	0	0	0	0	0	0	0	0	0	0	0	0	0	0	0	0	0	0	0	0	0	0	0	0	0	0	0	0	1.25254	1.27181	0	1.27181	RNASEQ: Yuon_chou_37507442_deg_day14
PTMS	0	0	0	0	0	0	0	0	0	0	0	0	0	0	0	0	0	0	0	0	0	0	0	0	0	0	0	0	1.23121	1.27169	0	1.27169	RNASEQ: Yuon_chou_37507442_deg_day14
ANKRD46	0	0	0	0	0	0	0	0	0	0	0	0	0	0	0	0	0	0	0	0	0	0	0	0	0	0	0	0	1.27164	0	0	1.27164	RNASEQ: Yuon_chou_37507442_deg_cord
ILKAP	0	0	0	0	0	0	0	0	0	0	0	0	0	0	0	0	0	0	0	0	0	0	0	0	0	0	0	1.14423	0	1.27156	0	1.27156	RNASEQ: Yuon_chou_37507442_deg_day14
AC009495.3	0	0	0	0	0	0	0	0	0	0	0	0	0	0	0	0	0	0	0	0	0	0	0	0	0	0	0	0	0	1.27144	0	1.27144	RNASEQ: Yuon_chou_37507442_deg_day14
KIAA1958	0	0	0	0	0	0	0	0	0	0	0	0	0	0	0	0	0	0	0	0	0	0	0	0	0	0	0	1.14462	1.23115	1.27131	0	1.27131	RNASEQ: Yuon_chou_37507442_deg_day14
ENSG00000267383	0	0	0	0	0	0	0	0	0	0	0	0	0	0	0	0	0	0	0	0	0	0	0	0	0	0	0	0	1.27131	0	0	1.27131	RNASEQ: Yuon_chou_37507442_deg_cord
PPP3CB	0	0	0	0	0	0	0	0	0	0	0	0	0	0	0	0	0	0	0	0	0	0	0	0	0	0	0	0	0	1.27119	0	1.27119	RNASEQ: Yuon_chou_37507442_deg_day14
KDELR2	0	0	0	0	0	0	0	0	0	0	0	0	0	0	0	0	0	0	0	0	0	0	0	0	0	0	0	0	0	1.27107	0	1.27107	RNASEQ: Yuon_chou_37507442_deg_day14
NCAPG2	0	0	0	0	0	0	0	0	0	0	0	0	0	0	0	0	0	0	0	0	0	0	0	0	0	0	1.16196	0	1.23656	1.27094	0	1.27094	RNASEQ: Yuon_chou_37507442_deg_day14
DRAP1	0	0	0	0	0	0	0	0	0	0	0	0	0	0	0	0	0	0	0	0	0	0	0	0	0	0	0	0	0	1.27082	0	1.27082	RNASEQ: Yuon_chou_37507442_deg_day14
LOC105376514	0	0	0	0	0	0	0	0	0	0	0	0	0	0	0	0	0	0	0	0	0	0	0	0	0	0	0	1.27073	0	0	0	1.27073	RNASEQ: Yuon_chou_37507442_cpg_day28
CKS1B	0	0	0	0	0	0	0	0	0	0	0	0	0	0	0	0	0	0	0	0	0	0	0	0	0	0	0	0	0	1.2707	0	1.2707	RNASEQ: Yuon_chou_37507442_deg_day14
ERI2	0	0	0	0	0	0	0	0	0	0	0	0	0	0	0	0	0	0	0	0	0	0	0	0	0	0	0	0	1.27067	0	0	1.27067	RNASEQ: Yuon_chou_37507442_deg_cord
RACGAP1	0	0	0	0	0	0	0	0	0	0	0	0	0	0	0	0	0	0	0	0	0	0	0	0	0	0	0	0	0	1.27058	0	1.27058	RNASEQ: Yuon_chou_37507442_deg_day14
NOSIP	0	0	0	0	0	0	0	0	0	0	0	0	0	0	0	0	0	0	0	0	0	0	0	0	0	0	0	0	1.27036	0	0	1.27036	RNASEQ: Yuon_chou_37507442_deg_cord
POLD1	0	0	0	0	0	0	0	0	0	0	0	0	0	0	0	0	0	0	0	0	0	0	1.10302	0	0	0	0	0	0	1.27033	0	1.27033	RNASEQ: Yuon_chou_37507442_deg_day14
EP300	0	0	0	0	0	0	0	0	0	0	0	0	0	0	0	0	0	0	0	0	0	0	0	0	0	0	0	0	0	1.27009	0	1.27009	RNASEQ: Yuon_chou_37507442_deg_day14
LINC01550	0	0	0	0	0	0	0	0	0	0	0	0	0	0	0	0	0	0	0	0	0	0	0	0	0	0	0	0	1.27004	0	0	1.27004	RNASEQ: Yuon_chou_37507442_deg_cord
RESF1	0	0	0	0	0	0	0	0	0	0	0	0	0	0	0	0	0	0	0	0	0	0	0	0	0	0	0	0	0	1.26997	0	1.26997	RNASEQ: Yuon_chou_37507442_deg_day14
KIF11	0	0	0	0	0	0	0	0	0	0	0	0	0	0	0	0	0	0	0	0	0	0	0	0	0	0	0	0	1.23927	1.26985	0	1.26985	RNASEQ: Yuon_chou_37507442_deg_day14
AC126773.6	0	0	0	0	0	0	0	0	0	0	0	0	0	0	0	0	0	0	0	0	0	0	0	0	0	0	0	0	1.26974	0	0	1.26974	RNASEQ: Yuon_chou_37507442_deg_cord
USP18	0	0	0	0	0	0	0	0	0	0	0	0	0	0	0	0	0	0	0	0	0	0	0	0	0	0	0	0	0	1.26973	0	1.26973	RNASEQ: Yuon_chou_37507442_deg_day14
HPCAL4	0	0	0	0	0	0	0	0	0	0	0	0	0	0	0	0	0	0	0	0	0	0	0	0	0	0	0	0	0	1.26961	0	1.26961	RNASEQ: Yuon_chou_37507442_deg_day14
CASK	0	0	0	0	0	0	0	0	0	0	0	0	0	0	0	0	0	0	0	0	0	0	0	0	0	0	0	0	1.22045	1.26949	0	1.26949	RNASEQ: Yuon_chou_37507442_deg_day14
MSH5	0	0	0	0	0	0	0	0	0	0	0	0	0	0	0	0	0	0	0	0	0	0	0	0	0	0	0	0	0	1.26937	0	1.26937	RNASEQ: Yuon_chou_37507442_deg_day14
KAT14	0	0	0	0	0	0	0	0	0	0	0	0	0	0	0	0	0	0	0	0	0	0	0	0	0	0	0	0	0	1.26925	0	1.26925	RNASEQ: Yuon_chou_37507442_deg_day14
FAM83D	0	0	0	0	0	0	0	0	0	0	0	0	0	0	0	0	0	0	0	0	0	0	0	0	0	0	0	0	0	1.26914	0	1.26914	RNASEQ: Yuon_chou_37507442_deg_day14
RN7SL752P	0	0	0	0	0	0	0	0	0	0	0	0	0	0	0	0	0	0	0	0	0	0	0	0	0	0	0	0	0	1.26902	0	1.26902	RNASEQ: Yuon_chou_37507442_deg_day14
LDLR	0	0	0	0	0	0	0	0	0	0	0	0	0	0	0	0	0	0	0	0	0	0	0	0	0	0	0	0	1.2379	1.2689	0	1.2689	RNASEQ: Yuon_chou_37507442_deg_day14
CCR4	0	0	0	0	0	0	0	0	0	0	0	0	0	0	0	0	0	0	0	0	0	0	0	0	0	0	0	0	1.26883	0	0	1.26883	RNASEQ: Yuon_chou_37507442_deg_cord
COX7B	0	0	0	0	0	0	0	0	0	0	0	0	0	0	0	0	0	0	0	0	0	0	0	0	0	0	0	0	0	1.26878	0	1.26878	RNASEQ: Yuon_chou_37507442_deg_day14
MGST3	0	0	0	0	0	0	0	0	0	0	0	0	0	0	0	0	0	0	0	0	0	0	0	0	0	0	0	0	0	1.26867	0	1.26867	RNASEQ: Yuon_chou_37507442_deg_day14
ADARB2-AS1	0	0	0	0	0	0	0	0	0	0	0	0	0	0	0	0	0	0	0	0	0	0	0	0	0	0	0	1.26858	0	0	0	1.26858	RNASEQ: Yuon_chou_37507442_cpg_day28
WDR59	0	0	0	0	0	0	0	0	0	0	0	0	0	0	0	0	0	0	0	0	0	0	0	0	0	0	0	0	0	1.26855	0	1.26855	RNASEQ: Yuon_chou_37507442_deg_day14
ZKSCAN1	0	0	0	0	0	0	0	0	0	0	0	0	0	0	0	0	0	0	0	0	0	0	0	0	0	0	0	0	0	1.26844	0	1.26844	RNASEQ: Yuon_chou_37507442_deg_day14
ATP2B1	0	0	0	0	0	0	0	0	0	0	0	0	0	0	0	0	0	0	0	0	0	0	0	0	0	0	0	0	0	1.26832	0	1.26832	RNASEQ: Yuon_chou_37507442_deg_day14
AC130456.3	0	0	0	0	0	0	0	0	0	0	0	0	0	0	0	0	0	0	0	0	0	0	0	0	0	0	0	0	0	1.26821	0	1.26821	RNASEQ: Yuon_chou_37507442_deg_day14
KCNN4	0	0	0	0	0	0	0	0	0	0	0	0	0	0	0	0	0	0	0	0	0	0	0	0	0	0	1.14942	0	0	1.26809	0	1.26809	RNASEQ: Yuon_chou_37507442_deg_day14
ENSG00000170846	0	0	0	0	0	0	0	0	0	0	0	0	0	0	0	0	0	0	0	0	0	0	0	0	0	0	0	0	1.22956	1.26798	0	1.26798	RNASEQ: Yuon_chou_37507442_deg_day14
HSPB1	0	0	0	0	0	0	0	0	0	0	0	0	0	0	0	0	0	0	0	0	0	0	0	0	0	0	0	0	1.26795	0	0	1.26795	RNASEQ: Yuon_chou_37507442_deg_cord
IFI27	0	0	0	0	0	0	0	0	0	0	0	0	0	0	0	0	0	0	0	0	0	0	0	0	0	0	0	0	0	1.26786	0	1.26786	RNASEQ: Yuon_chou_37507442_deg_day14
PLPP6	0	0	0	0	0	0	0	0	0	0	0	0	0	0	0	0	0	0	0	0	0	0	0	0	0	0	0	0	0	1.26775	0	1.26775	RNASEQ: Yuon_chou_37507442_deg_day14
VAMP5	0	0	0	0	0	0	0	0	0	0	0	0	0	0	0	0	0	0	0	0	0	0	0	0	0	0	0	0	0	1.26763	0	1.26763	RNASEQ: Yuon_chou_37507442_deg_day14
TADA3	0	0	0	0	0	0	0	0	0	0	0	0	0	0	0	0	0	0	0	0	0	0	0	0	0	0	0	0	0	1.26752	0	1.26752	RNASEQ: Yuon_chou_37507442_deg_day14
ZNF711	0	0	0	0	0	0	0	0	0	0	0	0	0	0	0	0	0	0	0	0	0	0	0	0	0	0	0	0	0	1.26741	0	1.26741	RNASEQ: Yuon_chou_37507442_deg_day14
ANP32BP1	0	0	0	0	0	0	0	0	0	0	0	0	0	0	0	0	0	0	0	0	0	0	0	0	0	0	0	0	1.26738	0	0	1.26738	RNASEQ: Yuon_chou_37507442_deg_cord
TREM1	0	0	0	0	0	0	0	0	0	0	0	0	0	0	0	0	0	0	0	0	0	0	0	0	0	0	0	0	0	1.26729	0	1.26729	RNASEQ: Yuon_chou_37507442_deg_day14
PCBP2	0	0	0	0	0	0	0	0	0	0	0	0	0	0	0	0	0	0	0	0	0	0	0	0	0	0	0	0	0	1.26718	0	1.26718	RNASEQ: Yuon_chou_37507442_deg_day14
RAPGEFL1	0	0	0	0	0	0	0	0	0	0	0	0	0	0	0	0	0	0	0	0	0	0	0	0	0	0	0	0	1.2671	0	0	1.2671	RNASEQ: Yuon_chou_37507442_deg_cord
H3C12	0	0	0	0	0	0	0	0	0	0	0	0	0	0	0	0	0	0	0	0	0	0	0	0	0	0	0	0	0	1.26707	0	1.26707	RNASEQ: Yuon_chou_37507442_deg_day14
ZNF202	0	0	0	0	0	0	0	0	0	0	0	0	0	0	0	0	0	0	0	0	0	0	0	0	0	0	0	0	0	1.26696	0	1.26696	RNASEQ: Yuon_chou_37507442_deg_day14
ADAL	0	0	0	0	0	0	0	0	0	0	0	0	0	0	0	0	0	0	0	0	0	0	0	0	0	0	0	0	0	1.26685	0	1.26685	RNASEQ: Yuon_chou_37507442_deg_day14
NLRC3	0	0	0	0	0	0	0	0	0	0	0	0	0	0	0	0	0	0	0	0	0	0	0	0	0	0	0	0	1.26682	0	0	1.26682	RNASEQ: Yuon_chou_37507442_deg_cord
ITGA6	0	0	0	0	0	0	0	0	0	0	0	0	0	0	0	0	0	0	0	0	0	0	0	0	0	0	1.15401	0	1.22338	1.26662	0	1.26662	RNASEQ: Yuon_chou_37507442_deg_day14
BCL2	0	0	0	0	0	0	0	0	0	0	0	0	0	0	0	0	0	0	0	0	0	0	0	0	0	0	0	0	1.26655	1.23603	0	1.26655	RNASEQ: Yuon_chou_37507442_deg_cord
MIR629	0	0	0	0	0	0	0	0	0	0	0	0	0	0	0	0	0	0	0	0	0	0	0	0	0	0	0	1.26647	0	0	0	1.26647	RNASEQ: Yuon_chou_37507442_cpg_day28
KIF4A	0	0	0	0	0	0	0	0	0	0	0	0	0	0	0	0	0	0	0	0	0	0	0	0	0	0	0	0	0	1.2664	0	1.2664	RNASEQ: Yuon_chou_37507442_deg_day14
IL27RA	0	0	0	0	0	0	0	0	0	0	0	0	0	0	0	0	0	0	0	0	0	0	0	0	0	0	0	0	1.23745	1.26629	0	1.26629	RNASEQ: Yuon_chou_37507442_deg_day14
IFIT3	0	0	0	0	0	0	0	0	0	0	0	0	0	0	0	0	0	0	0	0	0	0	0	0	0	0	0	0	0	1.26618	0	1.26618	RNASEQ: Yuon_chou_37507442_deg_day14
SLC37A2	0	0	0	0	0	0	0	0	0	0	0	0	0	0	0	0	0	0	0	0	0	0	0	0	0	0	0	0	0	1.26608	0	1.26608	RNASEQ: Yuon_chou_37507442_deg_day14
RPGRIP1L	0	0	0	0	0	0	0	0	0	0	0	0	0	0	0	0	0	0	0	0	0	0	0	0	0	0	0	0	1.26601	0	0	1.26601	RNASEQ: Yuon_chou_37507442_deg_cord
POLE2	0	0	0	0	0	0	0	0	0	0	0	0	0	0	0	0	0	0	0	0	0	0	0	0	0	0	0	0	0	1.26597	0	1.26597	RNASEQ: Yuon_chou_37507442_deg_day14
BRCA2	0	0	0	0	0	0	0	0	0	0	0	0	0	0	0	0	0	0	0	0	0	0	0	0	0	0	0	0	1.24428	1.26586	0	1.26586	RNASEQ: Yuon_chou_37507442_deg_day14
DAPK1	0	0	0	0	0	0	0	0	0	0	0	0	0	0	0	0	0	0	0	0	0	0	0	0	0	0	1.15504	0	0	1.26575	0	1.26575	RNASEQ: Yuon_chou_37507442_deg_day14
SNRPN	0	0	0	0	0	0	0	0	0	0	0	0	0	0	0	0	0	0	0	0	0	0	0	0	0	0	0	0	0	1.26564	0	1.26564	RNASEQ: Yuon_chou_37507442_deg_day14
SENP1	0	0	0	0	0	0	0	0	0	0	0	0	0	0	0	0	0	0	0	0	0	0	0	0	0	0	0	0	0	1.26553	0	1.26553	RNASEQ: Yuon_chou_37507442_deg_day14
SIT1	0	0	0	0	0	0	0	0	0	0	0	0	0	0	0	0	0	0	0	0	0	0	1.10302	0	0	0	0	0	1.26548	0	0	1.26548	RNASEQ: Yuon_chou_37507442_deg_cord
TIMM23	0	0	0	0	0	0	0	0	0	0	0	0	0	0	0	0	0	0	0	0	0	0	0	0	0	0	0	0	0	1.26543	0	1.26543	RNASEQ: Yuon_chou_37507442_deg_day14
DESI1	0	0	0	0	0	0	0	0	0	0	0	0	0	0	0	0	0	0	0	0	0	0	0	0	0	0	0	0	0	1.26532	0	1.26532	RNASEQ: Yuon_chou_37507442_deg_day14
TLR2	0	0	0	0	0	0	0	0	0	0	0	0	0	0	0	0	0	0	0	0	0	0	0	0	0	0	0	0	1.26522	0	0	1.26522	RNASEQ: Yuon_chou_37507442_deg_cord
RN7SL521P	0	0	0	0	0	0	0	0	0	0	0	0	0	0	0	0	0	0	0	0	0	0	0	0	0	0	0	0	0	1.26521	0	1.26521	RNASEQ: Yuon_chou_37507442_deg_day14
LYRM1	0	0	0	0	0	0	0	0	0	0	0	0	0	0	0	0	0	0	0	0	0	0	0	0	0	0	0	0	0	1.26511	0	1.26511	RNASEQ: Yuon_chou_37507442_deg_day14
TERF2	0	0	0	0	0	0	0	0	0	0	0	0	0	0	0	0	0	0	0	0	0	0	0	0	0	0	0	0	0	1.265	0	1.265	RNASEQ: Yuon_chou_37507442_deg_day14
SLA	0	0	0	0	0	0	0	0	0	0	0	0	0	0	0	0	0	0	0	0	0	0	0	0	0	0	0	0	1.26496	0	0	1.26496	RNASEQ: Yuon_chou_37507442_deg_cord
ENSG00000223509	0	0	0	0	0	0	0	0	0	0	0	0	0	0	0	0	0	0	0	0	0	0	0	0	0	0	0	0	0	1.26489	0	1.26489	RNASEQ: Yuon_chou_37507442_deg_day14
EZH2	0	0	0	0	0	0	0	0	0	0	0	0	0	0	0	0	0	0	0	0	0	0	0	0	0	0	0	0	0	1.26479	0	1.26479	RNASEQ: Yuon_chou_37507442_deg_day14
ZNF746	0	0	0	0	0	0	0	0	0	0	0	0	0	0	0	0	0	0	0	0	0	0	0	0	0	0	0	0	1.26471	0	0	1.26471	RNASEQ: Yuon_chou_37507442_deg_cord
EIF4ENIF1	0	0	0	0	0	0	0	0	0	0	0	0	0	0	0	0	0	0	0	0	0	0	0	0	0	0	0	1.15318	0	1.26468	0	1.26468	RNASEQ: Yuon_chou_37507442_deg_day14
AC124319.3	0	0	0	0	0	0	0	0	0	0	0	0	0	0	0	0	0	0	0	0	0	0	0	0	0	0	0	0	0	1.26458	0	1.26458	RNASEQ: Yuon_chou_37507442_deg_day14
AL096816.1	0	0	0	0	0	0	0	0	0	0	0	0	0	0	0	0	0	0	0	0	0	0	0	0	0	0	0	0	1.26445	0	0	1.26445	RNASEQ: Yuon_chou_37507442_deg_cord
JPH2	0	0	0	0	0	0	0	0	0	0	0	0	0	0	0	0	0	0	0	0	0	0	0	0	0	0	0	1.2644	0	0	0	1.2644	RNASEQ: Yuon_chou_37507442_cpg_day28
H2BC4	0	0	0	0	0	0	0	0	0	0	0	0	0	0	0	0	0	0	0	0	0	0	0	0	0	0	0	0	0	1.26437	0	1.26437	RNASEQ: Yuon_chou_37507442_deg_day14
TBC1D20	0	0	0	0	0	0	0	0	0	0	0	0	0	0	0	0	0	0	0	0	0	0	0	0	0	0	0	0	0	1.26426	0	1.26426	RNASEQ: Yuon_chou_37507442_deg_day14
PFKP	0	0	0	0	0	0	0	0	0	0	0	0	0	0	0	0	0	0	0	0	0	0	0	0	0	0	0	1.1472	1.2642	0	0	1.2642	RNASEQ: Yuon_chou_37507442_deg_cord
DYRK2	0	0	0	0	0	0	0	0	0	0	0	0	0	0	0	0	0	0	0	0	0	0	0	0	0	0	0	0	1.22466	1.26406	0	1.26406	RNASEQ: Yuon_chou_37507442_deg_day14
GNB1	0	0	0	0	0	0	0	0	0	0	0	0	0	0	0	0	0	0	0	0	0	0	0	0	0	0	0	0	0	1.26395	0	1.26395	RNASEQ: Yuon_chou_37507442_deg_day14
ADGRE3	0	0	0	0	0	0	0	0	0	0	0	0	0	0	0	0	0	0	0	0	0	0	0	0	0	0	0	0	0	1.26385	0	1.26385	RNASEQ: Yuon_chou_37507442_deg_day14
AP001189.4	0	0	0	0	0	0	0	0	0	0	0	0	0	0	0	0	0	0	0	0	0	0	0	0	0	0	0	0	1.26371	0	0	1.26371	RNASEQ: Yuon_chou_37507442_deg_cord
H4C9	0	0	0	0	0	0	0	0	0	0	0	0	0	0	0	0	0	0	0	0	0	0	0	0	0	0	0	0	0	1.26365	0	1.26365	RNASEQ: Yuon_chou_37507442_deg_day14
SETD7	0	0	0	0	0	0	0	0	0	0	0	0	0	0	0	0	0	0	0	0	0	0	0	0	0	0	0	0	0	1.26354	0	1.26354	RNASEQ: Yuon_chou_37507442_deg_day14
CEACAM4	0	0	0	0	0	0	0	0	0	0	0	0	0	0	0	0	0	0	0	0	0	0	0	0	0	0	0	0	1.26347	0	0	1.26347	RNASEQ: Yuon_chou_37507442_deg_cord
RN7SL151P	0	0	0	0	0	0	0	0	0	0	0	0	0	0	0	0	0	0	0	0	0	0	0	0	0	0	0	0	0	1.26344	0	1.26344	RNASEQ: Yuon_chou_37507442_deg_day14
ELAPOR2	0	0	0	0	0	0	0	0	0	0	0	0	0	0	0	0	0	0	0	0	0	0	0	0	0	0	0	0	0	1.26334	0	1.26334	RNASEQ: Yuon_chou_37507442_deg_day14
ANAPC1	0	0	0	0	0	0	0	0	0	0	0	0	0	0	0	0	0	0	0	0	0	0	0	0	0	0	0	0	1.26323	0	0	1.26323	RNASEQ: Yuon_chou_37507442_deg_cord
LINC01891	0	0	0	0	0	0	0	0	0	0	0	0	0	0	0	0	0	0	0	0	0	0	0	0	0	0	1.16325	0	0	1.26304	0	1.26304	RNASEQ: Yuon_chou_37507442_deg_day14
PRANCR	0	0	0	0	0	0	0	0	0	0	0	0	0	0	0	0	0	0	0	0	0	0	0	0	0	0	0	0	1.26299	0	0	1.26299	RNASEQ: Yuon_chou_37507442_deg_cord
HPRT1	0	0	0	0	0	0	0	0	0	0	0	0	0	0	0	0	0	0	0	0	0	0	0	0	0	0	0	0	1.23577	1.26284	0	1.26284	RNASEQ: Yuon_chou_37507442_deg_day14
REXO4	0	0	0	0	0	0	0	0	0	0	0	0	0	0	0	0	0	0	0	0	0	0	0	0	0	0	0	0	1.26276	0	0	1.26276	RNASEQ: Yuon_chou_37507442_deg_cord
RN7SL471P	0	0	0	0	0	0	0	0	0	0	0	0	0	0	0	0	0	0	0	0	0	0	0	0	0	0	0	0	1.21848	1.26274	0	1.26274	RNASEQ: Yuon_chou_37507442_deg_day14
ASB13	0	0	0	0	0	0	0	0	0	0	0	0	0	0	0	0	0	0	0	0	0	0	0	0	0	0	0	0	0	1.26264	0	1.26264	RNASEQ: Yuon_chou_37507442_deg_day14
SLC5A3	0	0	0	0	0	0	0	0	0	0	0	0	0	0	0	0	0	0	0	0	0	0	0	0	0	0	0	0	0	1.26254	0	1.26254	RNASEQ: Yuon_chou_37507442_deg_day14
RAB13	0	0	0	0	0	0	0	0	0	0	0	0	0	0	0	0	0	0	0	0	0	0	0	0	0	0	0	0	1.26253	0	0	1.26253	RNASEQ: Yuon_chou_37507442_deg_cord
AC015912.3	0	0	0	0	0	0	0	0	0	0	0	0	0	0	0	0	0	0	0	0	0	0	0	0	0	0	0	0	0	1.26244	0	1.26244	RNASEQ: Yuon_chou_37507442_deg_day14
RNVU1-27	0	0	0	0	0	0	0	0	0	0	0	0	0	0	0	0	0	0	0	0	0	0	0	0	0	0	0	0	0	1.26234	0	1.26234	RNASEQ: Yuon_chou_37507442_deg_day14
TGS1	0	0	0	0	0	0	0	0	0	0	0	0	0	0	0	0	0	0	0	0	0	0	0	0	0	0	0	0	1.2623	0	0	1.2623	RNASEQ: Yuon_chou_37507442_deg_cord
GCLM	0	0	0	0	0	0	0	0	0	0	0	0	0	0	0	0	0	0	0	0	0	0	0	0	0	0	0	0	0	1.26214	0	1.26214	RNASEQ: Yuon_chou_37507442_deg_day14
NSMCE3	0	0	0	0	0	0	0	0	0	0	0	0	0	0	0	0	0	0	0	0	0	0	0	0	0	0	0	0	1.26207	0	0	1.26207	RNASEQ: Yuon_chou_37507442_deg_cord
PTPRA	0	0	0	0	0	0	0	0	0	0	0	0	0	0	0	0	0	0	0	0	0	0	0	0	0	0	0	0	0	1.26204	0	1.26204	RNASEQ: Yuon_chou_37507442_deg_day14
RN7SL678P	0	0	0	0	0	0	0	0	0	0	0	0	0	0	0	0	0	0	0	0	0	0	0	0	0	0	0	0	0	1.26194	0	1.26194	RNASEQ: Yuon_chou_37507442_deg_day14
BAIAP2-DT	0	0	0	0	0	0	0	0	0	0	0	0	0	0	0	0	0	0	0	0	0	0	0	0	0	0	0	0	0	1.26185	0	1.26185	RNASEQ: Yuon_chou_37507442_deg_day14
MYD88	0	0	0	0	0	0	0	0	0	0	0	0	0	0	0	0	0	0	0	0	0	0	0	0	0	0	0	1.1446	0	1.26175	0	1.26175	RNASEQ: Yuon_chou_37507442_deg_day14
AC100827.2	0	0	0	0	0	0	0	0	0	0	0	0	0	0	0	0	0	0	0	0	0	0	0	0	0	0	0	0	1.26162	0	0	1.26162	RNASEQ: Yuon_chou_37507442_deg_cord
SLC25A15	0	0	0	0	0	0	0	0	0	0	0	0	0	0	0	0	0	0	0	0	0	0	0	0	0	0	0	0	0	1.26146	0	1.26146	RNASEQ: Yuon_chou_37507442_deg_day14
AC004918.3	0	0	0	0	0	0	0	0	0	0	0	0	0	0	0	0	0	0	0	0	0	0	0	0	0	0	0	0	1.2614	0	0	1.2614	RNASEQ: Yuon_chou_37507442_deg_cord
ENSG00000283674	0	0	0	0	0	0	0	0	0	0	0	0	0	0	0	0	0	0	0	0	0	0	0	0	0	0	0	0	0	1.26136	0	1.26136	RNASEQ: Yuon_chou_37507442_deg_day14
ATP23	0	0	0	0	0	0	0	0	0	0	0	0	0	0	0	0	0	0	0	0	0	0	0	0	0	0	0	0	0	1.26127	0	1.26127	RNASEQ: Yuon_chou_37507442_deg_day14
TMSB10	0	0	0	0	0	0	0	0	0	0	0	0	0	0	0	0	0	0	0	0	0	0	0	0	0	0	0	0	1.26118	0	0	1.26118	RNASEQ: Yuon_chou_37507442_deg_cord
RMI2	0	0	0	0	0	0	0	0	0	0	0	0	0	0	0	0	0	0	0	0	0	0	0	0	0	0	0	0	0	1.26117	0	1.26117	RNASEQ: Yuon_chou_37507442_deg_day14
CCRL2	0	0	0	0	0	0	0	0	0	0	0	0	0	0	0	0	0	0	0	0	0	0	0	0	0	0	0	0	0	1.26108	0	1.26108	RNASEQ: Yuon_chou_37507442_deg_day14
TMEM120B	0	0	0	0	0	0	0	0	0	0	0	0	0	0	0	0	0	0	0	0	0	0	0	0	0	0	0	0	1.26097	1.26032	0	1.26097	RNASEQ: Yuon_chou_37507442_deg_cord
LRCH1	0	0	0	0	0	0	0	0	0	0	0	0	0	0	0	0	0	0	0	0	0	0	0	0	0	0	0	0	0	1.26089	0	1.26089	RNASEQ: Yuon_chou_37507442_deg_day14
DENND1A	0	0	0	0	0	0	0	0	0	0	0	0	0	0	0	0	0	0	0	0	0	0	0	0	0	0	0	0	0	1.26079	0	1.26079	RNASEQ: Yuon_chou_37507442_deg_day14
SCML2	0	0	0	0	0	0	0	0	0	0	0	0	0	0	0	0	0	0	0	0	0	0	0	0	0	0	0	0	1.26075	0	0	1.26075	RNASEQ: Yuon_chou_37507442_deg_cord
AC092120.1	0	0	0	0	0	0	0	0	0	0	0	0	0	0	0	0	0	0	0	0	0	0	0	0	0	0	0	0	1.23798	1.2607	0	1.2607	RNASEQ: Yuon_chou_37507442_deg_day14
TADA2A	0	0	0	0	0	0	0	0	0	0	0	0	0	0	0	0	0	0	0	0	0	0	0	0	0	0	0	0	0	1.2606	0	1.2606	RNASEQ: Yuon_chou_37507442_deg_day14
TBK1	0	0	0	0	0	0	0	0	0	0	0	0	0	0	0	0	0	0	0	0	0	0	0	0	0	0	0	0	1.26054	0	0	1.26054	RNASEQ: Yuon_chou_37507442_deg_cord
KCTD6	0	0	0	0	0	0	0	0	0	0	0	0	0	0	0	0	0	0	0	0	0	0	0	0	0	0	0	0	0	1.26051	0	1.26051	RNASEQ: Yuon_chou_37507442_deg_day14
TGFBI	0	0	0	0	0	0	0	0	0	0	0	0	0	0	0	0	0	0	0	0	0	0	0	0	0	0	0	0	0	1.26041	0	1.26041	RNASEQ: Yuon_chou_37507442_deg_day14
FAF2	0	0	0	0	0	0	0	0	0	0	0	0	0	0	0	0	0	0	0	0	0	0	0	0	0	0	0	1.26037	0	0	0	1.26037	RNASEQ: Yuon_chou_37507442_cpg_day28
GIMAP2	0	0	0	0	0	0	0	0	0	0	0	0	0	0	0	0	0	0	0	0	0	0	0	0	0	0	0	0	1.26033	0	0	1.26033	RNASEQ: Yuon_chou_37507442_deg_cord
CGAS	0	0	0	0	0	0	0	0	0	0	0	0	0	0	0	0	0	0	0	0	0	0	0	0	0	0	0	0	0	1.26023	0	1.26023	RNASEQ: Yuon_chou_37507442_deg_day14
CDC16	0	0	0	0	0	0	0	0	0	0	0	0	0	0	0	0	0	0	0	0	0	0	0	0	0	0	1.15037	0	0	1.26013	0	1.26013	RNASEQ: Yuon_chou_37507442_deg_day14
ENSG00000284707	0	0	0	0	0	0	0	0	0	0	0	0	0	0	0	0	0	0	0	0	0	0	0	0	0	0	0	0	1.26012	0	0	1.26012	RNASEQ: Yuon_chou_37507442_deg_cord
BUB1B	0	0	0	0	0	0	0	0	0	0	0	0	0	0	0	0	0	0	0	0	0	0	0	0	0	0	0	0	1.23851	1.26004	0	1.26004	RNASEQ: Yuon_chou_37507442_deg_day14
Metazoa_SRP	0	0	0	0	0	0	0	0	0	0	0	0	0	0	0	0	0	0	0	0	0	0	0	0	0	0	0	0	1.21482	1.25995	0	1.25995	RNASEQ: Yuon_chou_37507442_deg_day14
CIAPIN1	0	0	0	0	0	0	0	0	0	0	0	0	0	0	0	0	0	0	0	0	0	0	0	0	0	0	0	0	1.25992	0	0	1.25992	RNASEQ: Yuon_chou_37507442_deg_cord
HDDC2	0	0	0	0	0	0	0	0	0	0	0	0	0	0	0	0	0	0	0	0	0	0	0	0	0	0	0	0	0	1.25986	0	1.25986	RNASEQ: Yuon_chou_37507442_deg_day14
HABP4	0	0	0	0	0	0	0	0	0	0	0	0	0	0	0	0	0	0	0	0	0	0	0	0	0	0	0	0	0	1.25976	0	1.25976	RNASEQ: Yuon_chou_37507442_deg_day14
ZNF32	0	0	0	0	0	0	0	0	0	0	0	0	0	0	0	0	0	0	0	0	0	0	0	0	0	0	0	0	1.25972	0	0	1.25972	RNASEQ: Yuon_chou_37507442_deg_cord
ARL13B	0	0	0	0	0	0	0	0	0	0	0	0	0	0	0	0	0	0	0	0	0	0	0	0	0	0	0	0	0	1.25967	0	1.25967	RNASEQ: Yuon_chou_37507442_deg_day14
CLMN	0	0	0	0	0	0	0	0	0	0	0	0	0	0	0	0	0	0	0	0	0	0	0	0	0	0	0	0	0	1.25958	0	1.25958	RNASEQ: Yuon_chou_37507442_deg_day14
ANO10	0	0	0	0	0	0	0	0	0	0	0	0	0	0	0	0	0	0	0	0	0	0	0	0	0	0	0	0	1.25952	0	0	1.25952	RNASEQ: Yuon_chou_37507442_deg_cord
PSMA6	0	0	0	0	0	0	0	0	0	0	0	0	0	0	0	0	0	0	0	0	0	0	0	0	0	0	0	0	1.21575	1.25949	0	1.25949	RNASEQ: Yuon_chou_37507442_deg_day14
MIEN1	0	0	0	0	0	0	0	0	0	0	0	0	0	0	0	0	0	0	0	0	0	0	0	0	0	0	0	0	0	1.2594	0	1.2594	RNASEQ: Yuon_chou_37507442_deg_day14
SLC4A7	0	0	0	0	0	0	0	0	0	0	0	0	0	0	0	0	0	0	0	0	0	0	0	0	0	0	0	0	1.2263	1.25931	0	1.25931	RNASEQ: Yuon_chou_37507442_deg_day14
CAMKMT	0	0	0	0	0	0	0	0	0	0	0	0	0	0	0	0	0	0	0	0	0	0	0	0	0	0	0	0	0	1.25913	0	1.25913	RNASEQ: Yuon_chou_37507442_deg_day14
ASS1P1	0	0	0	0	0	0	0	0	0	0	0	0	0	0	0	0	0	0	0	0	0	0	0	0	0	0	0	0	1.25912	0	0	1.25912	RNASEQ: Yuon_chou_37507442_deg_cord
LINC02328	0	0	0	0	0	0	0	0	0	0	0	0	0	0	0	0	0	0	0	0	0	0	0	0	0	0	0	0	0	1.25904	0	1.25904	RNASEQ: Yuon_chou_37507442_deg_day14
AURKB	0	0	0	0	0	0	0	0	0	0	0	0	0	0	0	0	0	0	0	0	0	0	0	0	0	0	0	0	1.23192	1.25895	0	1.25895	RNASEQ: Yuon_chou_37507442_deg_day14
NEBL	0	0	0	0	0	0	0	0	0	0	0	0	0	0	0	0	0	0	0	0	0	0	0	0	0	0	0	0	1.25892	0	0	1.25892	RNASEQ: Yuon_chou_37507442_deg_cord
ZBTB39	0	0	0	0	0	0	0	0	0	0	0	0	0	0	0	0	0	0	0	0	0	0	0	0	0	0	0	0	0	1.25886	0	1.25886	RNASEQ: Yuon_chou_37507442_deg_day14
RN7SL166P	0	0	0	0	0	0	0	0	0	0	0	0	0	0	0	0	0	0	0	0	0	0	0	0	0	0	0	0	0	1.25877	0	1.25877	RNASEQ: Yuon_chou_37507442_deg_day14
TUSC3	0	0	0	0	0	0	0	0	0	0	0	0	0	0	0	0	0	0	0	0	0	0	0	0	0	0	0	0	1.25873	0	0	1.25873	RNASEQ: Yuon_chou_37507442_deg_cord
CHRM3-AS2	0	0	0	0	0	0	0	0	0	0	0	0	0	0	0	0	0	0	0	0	0	0	0	0	0	0	0	0	1.25656	1.25859	0	1.25859	RNASEQ: Yuon_chou_37507442_deg_day14
SNHG12	0	0	0	0	0	0	0	0	0	0	0	0	0	0	0	0	0	0	0	0	0	0	0	0	0	0	0	0	0	1.2585	0	1.2585	RNASEQ: Yuon_chou_37507442_deg_day14
[truncated: 6,018 more rows]
