# Supplementary material for: Systems-Level Insights into Bronchopulmonary Dysplasia from Meta-Analysis of Genome- Scale Studies
Source: Research Square preprint supplement (doi:10.21203/rs.3.rs-8552464/v1), 2026-01-21
Supplement: Supplementary file 3 [file a8fb23e1d00a67da693af5e6.xlsx]

## Sheet: Sheet1
gene	Nichols_24571919	Chen28689251	Bao_27137150	Bhaskaran_22911455	Chao27770432	Denervaud_26353077_down_ranked	Denervaud_26353077_up_ranked	Natarajan_28851267_down	Natarajan_28851267_up	Revhaug_31454811_down_ranked	Revhaug_31454811_up_ranked	Shrestha_33446917_down_	Shrestha_33446917_up	Al_mudares_37368978_female	Al_mudares_37368978_male	Bhattacharya_25150061	Cheng_31961470	Coarfa_28818871_female_down_day21_ranked	Coarfa_28818871_female_down_day7_ranked	Coarfa_28818871_female_up_day21_ranked	Coarfa_28818871_female_up_day7_ranked	Coarfa_28818871_male_down_day21	Coarfa_28818871_male_down_day7	Coarfa_28818871_male_up_day21	Coarfa_28818871_male_up_day7	Dong_36157523	Dravet_gounot_29287116_p10	Dravet_gounot_29287116_p21	Hirani_37876024	Nitkin_32753701_24hr_unranked	Nitkin_32753701_6hr_unranked	Rao_37310763_ranked	Hurskainen_33692365_endothelial	Hurskainen_33692365_epithelial	Hurskainen_33692365_stroma	Scaffa_34417156_ranked	maic_score	contributors
RAC2	0	1.55983	0	0	0	0	1.69115	0	0	0	0	0	0	0	0	0	0	0	0	0	0	0	0	0	0	0	0	0	0	1.52158	0	1.36166	0	0	0	1.44814	6.22069	METHYLATION: Chen28689251, SCRNASEQ: Scaffa_34417156_ranked, MICROARRAY: Denervaud_26353077_up_ranked, RNASEQ: Nitkin_32753701_24hr_unranked
CXCR2	0	1.55983	0	0	0	0	1.69115	0	0	0	0	0	0	0	0	0	0	0	0	0	0	0	0	0	0	0	0	0	0	1.52158	0	1.50357	1.41356	1.41095	1.41264	0	6.18611	METHYLATION: Chen28689251, SCRNASEQ: Hurskainen_33692365_endothelial, MICROARRAY: Denervaud_26353077_up_ranked, RNASEQ: Nitkin_32753701_24hr_unranked
IL1R2	0	1.55983	0	0	0	0	1.69115	0	0	0	0	0	0	0	0	0	0	0	0	0	0	0	0	0	0	0	0	0	0	0	0	1.42459	1.41543	1.41282	1.41481	0	6.09099	METHYLATION: Chen28689251, SCRNASEQ: Hurskainen_33692365_endothelial, MICROARRAY: Denervaud_26353077_up_ranked, RNASEQ: Rao_37310763_ranked
BAX	0	0	0	0	1.52769	0	0	0	0	0	0	0	0	0	0	2.27371	0	0	0	0	0	0	0	0	0	0	0	0	1.6177	0	0	0	0	0	0	1.44552	5.24692	RNASEQ: Bhattacharya_25150061, SCRNASEQ: Scaffa_34417156_ranked, MICROARRAY: Chao27770432
CCDC3	0	0	0	0	0	2.0322	0	0	0	0	0	0	0	0	0	0	0	0	0	0	0	0	0	0	0	0	0	0	1.64349	0	0	0	1.4051	1.40261	1.40275	0	5.08079	SCRNASEQ: Hurskainen_33692365_endothelial, MICROARRAY: Denervaud_26353077_down_ranked, RNASEQ: Hirani_37876024
EGFEM1P	0	0	0	0	0	2.06642	0	0	0	0	0	0	0	0	0	0	0	0	0	0	0	0	0	0	0	0	0	0	1.55634	0	0	0	0	0	0	1.4441	5.06686	SCRNASEQ: Scaffa_34417156_ranked, MICROARRAY: Denervaud_26353077_down_ranked, RNASEQ: Hirani_37876024
PDGFRL	0	0	0	0	0	1.98086	0	0	0	0	0	0	0	0	0	0	0	0	0	0	0	0	0	0	0	0	0	0	1.57847	0	0	0	0	0	0	1.44386	5.00319	SCRNASEQ: Scaffa_34417156_ranked, MICROARRAY: Denervaud_26353077_down_ranked, RNASEQ: Hirani_37876024
FMO3	0	0	0	0	0	0	0	0	2.22869	0	0	0	0	0	0	0	0	0	0	0	0	0	0	0	0	0	0	0	0	0	0	1.36385	0	0	1.40643	0	4.99897	MICROARRAY: Natarajan_28851267_up, SCRNASEQ: Hurskainen_33692365_stroma, RNASEQ: Rao_37310763_ranked
THSD7B	0	0	0	0	0	2.04075	0	0	0	0	0	0	0	0	0	1.49302	0	0	0	0	0	0	0	0	0	0	0	0	1.43573	0	0	0	1.41068	1.40807	1.40931	0	4.94444	SCRNASEQ: Hurskainen_33692365_endothelial, RNASEQ: Bhattacharya_25150061, MICROARRAY: Denervaud_26353077_down_ranked
PTGS2	0	0	0	0	0	0	0	0	2.04101	0	0	0	0	0	0	0	0	0	0	0	0	0	0	0	0	0	0	0	1.45765	0	0	0	1.40931	1.40667	1.40769	0	4.90797	SCRNASEQ: Hurskainen_33692365_endothelial, MICROARRAY: Natarajan_28851267_up, RNASEQ: Hirani_37876024
HPGD	0	0	0	1.84727	0	0	0	0	0	0	0	0	0	0	0	1.49302	0	0	0	0	0	0	0	0	0	0	0	0	1.61179	0	0	0	0	0	0	1.44749	4.90655	RNASEQ: Hirani_37876024, SCRNASEQ: Scaffa_34417156_ranked, MICROARRAY: Bhaskaran_22911455
CYP2E1	0	0	0	0	0	1.92953	0	0	0	0	0	0	0	0	0	0	0	0	1.49187	0	0	0	0	0	0	0	0	0	1.43735	0	0	1.38913	0	0	0	1.44397	4.86537	SCRNASEQ: Scaffa_34417156_ranked, RNASEQ: Coarfa_28818871_female_down_day7_ranked, MICROARRAY: Denervaud_26353077_down_ranked
MARK1	0	0	0	0	0	1.97231	0	0	0	0	0	0	0	0	0	0	0	0	0	0	0	0	0	0	0	0	0	0	1.43947	0	0	0	1.40601	1.4035	1.40379	1.44371	4.85549	SCRNASEQ: Scaffa_34417156_ranked, MICROARRAY: Denervaud_26353077_down_ranked, RNASEQ: Hirani_37876024
NOX4	0	0	0	0	0	1.9552	0	0	0	0	0	0	0	0	0	0	0	0	0	0	0	0	0	0	0	0	0	0	0	0	0	1.44213	0	0	0	1.4468	4.84413	SCRNASEQ: Scaffa_34417156_ranked, MICROARRAY: Denervaud_26353077_down_ranked, RNASEQ: Rao_37310763_ranked
LCN2	0	0	0	1.84727	0	0	1.69115	0	0	0	1.619	0	0	0	1.44457	0	0	0	0	0	0	0	0	0	0	1.50841	0	0	1.54319	1.52158	0	0	1.40205	1.39962	1.39925	1.44898	4.83945	SCRNASEQ: Scaffa_34417156_ranked, RNASEQ: Hirani_37876024, MICROARRAY: Bhaskaran_22911455
CCDC85B	0	0	0	0	0	0	0	0	1.94553	0	0	0	0	0	0	0	0	0	0	0	0	0	0	0	0	0	0	0	1.42798	0	0	0	0	0	0	1.44954	4.82306	SCRNASEQ: Scaffa_34417156_ranked, MICROARRAY: Natarajan_28851267_up, RNASEQ: Hirani_37876024
LGALS3	0	0	0	1.84727	0	0	0	0	0	0	0	0	0	0	0	0	0	0	0	0	0	0	0	0	0	0	0	0	1.43774	1.52158	0	0	0	0	0	1.44792	4.81676	SCRNASEQ: Scaffa_34417156_ranked, RNASEQ: Nitkin_32753701_24hr_unranked, MICROARRAY: Bhaskaran_22911455
CCN2	0	0	0	1.84727	0	0	0	0	0	0	0	0	0	0	0	0	0	0	0	0	0	0	0	0	0	0	0	0	1.42599	1.52158	0	0	0	0	0	1.44538	4.81423	SCRNASEQ: Scaffa_34417156_ranked, RNASEQ: Nitkin_32753701_24hr_unranked, MICROARRAY: Bhaskaran_22911455
IGF1	0	0	0	1.84727	0	0	0	0	0	0	0	0	0	0	1.44408	0	0	0	0	0	0	0	0	0	0	0	0	0	0	1.52158	0	0	0	0	0	1.44328	4.81213	SCRNASEQ: Scaffa_34417156_ranked, RNASEQ: Nitkin_32753701_24hr_unranked, MICROARRAY: Bhaskaran_22911455
ATP1A2	0	0	0	0	0	1.85254	0	0	0	0	0	0	0	0	0	1.49302	0	0	0	0	0	0	0	0	0	0	0	0	1.48188	0	0	0	1.40699	1.40444	1.40496	0	4.75255	SCRNASEQ: Hurskainen_33692365_endothelial, RNASEQ: Bhattacharya_25150061, MICROARRAY: Denervaud_26353077_down_ranked
CD2	0	1.55983	0	0	0	0	1.69115	0	0	0	0	0	0	0	0	1.49302	0	0	0	0	0	0	0	0	0	0	0	0	0	0	0	1.47223	0	0	0	0	4.744	METHYLATION: Chen28689251, RNASEQ: Bhattacharya_25150061, MICROARRAY: Denervaud_26353077_up_ranked
TMEM176B	0	0	0	1.84727	0	0	0	0	0	0	0	0	0	0	1.44293	0	0	0	0	0	0	0	0	0	0	0	0	0	1.42452	0	0	0	0	0	0	1.44986	4.74006	SCRNASEQ: Scaffa_34417156_ranked, MICROARRAY: Bhaskaran_22911455, RNASEQ: Al_mudares_37368978_male
FABP5	0	0	0	1.84727	0	0	0	0	0	0	0	0	1.73795	0	1.44287	0	0	0	0	0	0	0	0	0	0	0	0	0	0	0	0	0	0	0	0	1.44898	4.73911	SCRNASEQ: Scaffa_34417156_ranked, MICROARRAY: Bhaskaran_22911455, RNASEQ: Al_mudares_37368978_male
GAPDH	0	0	0	1.84727	0	0	0	0	0	0	0	0	0	0	0	0	0	0	0	0	0	0	0	0	0	0	0	0	1.43879	0	0	0	0	0	0	1.4505	4.73655	SCRNASEQ: Scaffa_34417156_ranked, MICROARRAY: Bhaskaran_22911455, RNASEQ: Hirani_37876024
PRDX1	0	0	0	1.84727	0	0	0	0	0	0	0	0	0	0	0	0	0	0	0	0	0	0	0	0	0	0	0	0	1.43611	0	0	0	0	0	0	1.4501	4.73349	SCRNASEQ: Scaffa_34417156_ranked, MICROARRAY: Bhaskaran_22911455, RNASEQ: Hirani_37876024
LDHA	0	0	0	1.84727	0	0	0	0	0	0	0	0	0	0	0	0	0	0	0	0	0	0	0	0	0	0	0	0	1.42784	0	0	0	0	0	0	1.45069	4.7258	SCRNASEQ: Scaffa_34417156_ranked, MICROARRAY: Bhaskaran_22911455, RNASEQ: Hirani_37876024
ACTG2	0	0	0	1.84727	0	0	0	0	0	0	0	0	0	0	0	0	0	0	0	0	0	0	0	0	0	0	0	0	0	0	0	1.40316	0	0	0	1.4438	4.69423	SCRNASEQ: Scaffa_34417156_ranked, MICROARRAY: Bhaskaran_22911455, RNASEQ: Rao_37310763_ranked
Ifi47	0	1.55983	0	0	0	0	1.69115	0	0	0	0	0	0	0	1.44299	0	0	0	0	0	0	0	0	0	0	0	0	0	0	0	0	0	0	0	0	0	4.69397	METHYLATION: Chen28689251, MICROARRAY: Denervaud_26353077_up_ranked, RNASEQ: Al_mudares_37368978_male
DES	0	0	0	1.84727	0	0	0	0	0	0	0	0	0	0	0	0	0	0	0	0	0	0	0	0	0	0	0	0	0	0	0	1.38164	1.41304	1.41045	1.41206	1.4438	4.6727	SCRNASEQ: Scaffa_34417156_ranked, MICROARRAY: Bhaskaran_22911455, RNASEQ: Rao_37310763_ranked
MEST	0	0	1.56066	0	0	0	0	0	0	0	0	0	0	0	0	0	0	0	0	0	0	0	0	0	0	0	0	0	1.43377	0	0	1.36266	0	0	0	1.66912	4.66355	MICROARRAY: Bao_27137150, SCRNASEQ: Scaffa_34417156_ranked, RNASEQ: Hirani_37876024
TF	0	0	0	0	0	0	1.69115	0	0	0	0	0	0	0	0	1.49302	0	0	0	0	0	0	0	0	0	0	0	0	0	1.52158	0	0	0	0	0	1.44927	4.662	RNASEQ: Nitkin_32753701_24hr_unranked, SCRNASEQ: Scaffa_34417156_ranked, MICROARRAY: Denervaud_26353077_up_ranked
VSNL1	0	0	1.56066	0	0	0	0	0	0	0	0	0	0	0	0	1.49302	0	0	0	0	0	0	0	0	0	0	0	0	1.65929	0	0	1.36403	0	0	0	1.44203	4.66198	MICROARRAY: Bao_27137150, RNASEQ: Hirani_37876024, SCRNASEQ: Scaffa_34417156_ranked
SELL	0	0	0	0	0	0	1.69115	0	0	0	0	0	0	0	1.44279	0	0	0	0	0	0	0	0	0	0	0	0	0	0	1.52158	0	0	1.40816	1.40556	1.40631	1.44854	4.66127	SCRNASEQ: Scaffa_34417156_ranked, MICROARRAY: Denervaud_26353077_up_ranked, RNASEQ: Nitkin_32753701_24hr_unranked
CSF3R	0	1.55983	0	0	0	0	1.69115	0	0	0	0	0	0	0	0	0	0	0	0	0	0	0	0	0	0	0	0	0	0	0	0	1.41013	0	0	0	0	4.66111	METHYLATION: Chen28689251, MICROARRAY: Denervaud_26353077_up_ranked, RNASEQ: Rao_37310763_ranked
BASP1	0	0	0	1.84727	0	0	0	0	0	0	0	0	0	0	0	0	0	0	0	0	0	0	0	0	0	0	0	0	0	0	0	1.36317	0	0	0	1.44547	4.6559	SCRNASEQ: Scaffa_34417156_ranked, MICROARRAY: Bhaskaran_22911455, RNASEQ: Rao_37310763_ranked
C3	0	0	0	0	0	0	1.69115	0	0	0	0	0	0	0	0	0	0	0	0	0	0	0	0	0	0	1.50841	0	0	0	0	0	0	0	0	0	1.44702	4.64658	SCRNASEQ: Scaffa_34417156_ranked, RNASEQ: Dong_36157523, MICROARRAY: Denervaud_26353077_up_ranked
APLNR	0	0	0	0	0	0	0	1.59486	0	0	0	0	0	1.45234	1.44384	1.49436	0	0	0	0	0	0	0	0	0	0	0	0	1.64211	0	0	1.36184	1.39888	1.39657	1.3957	0	4.63586	SCRNASEQ: Hurskainen_33692365_endothelial, RNASEQ: Hirani_37876024, MICROARRAY: Natarajan_28851267_down
MMP14	0	0	0	0	0	0	0	0	0	0	0	0	1.73795	0	1.44431	0	0	0	0	0	0	0	0	0	0	0	0	0	0	0	0	0	0	0	0	1.45023	4.63249	SCRNASEQ: Scaffa_34417156_ranked, MICROARRAY: Shrestha_33446917_up, RNASEQ: Al_mudares_37368978_male
CHI3L1	0	0	0	0	0	0	1.69115	0	0	0	0	0	0	0	0	0	0	0	0	0	0	0	0	0	0	0	0	0	1.44028	1.52158	0	0	1.41003	1.4074	1.40856	0	4.62276	SCRNASEQ: Hurskainen_33692365_endothelial, MICROARRAY: Denervaud_26353077_up_ranked, RNASEQ: Nitkin_32753701_24hr_unranked
ANO3	0	0	1.56066	0	0	0	0	0	0	0	0	0	0	0	0	0	0	0	0	0	0	0	0	0	0	0	0	0	1.65486	0	0	0	1.39737	1.39508	1.39388	0	4.61288	MICROARRAY: Bao_27137150, SCRNASEQ: Hurskainen_33692365_endothelial, RNASEQ: Hirani_37876024
PTPRC	0	0	0	0	0	0	1.69115	0	0	0	0	0	0	0	0	0	0	0	0	0	0	0	0	0	0	1.50841	0	0	0	0	0	0	1.40956	1.40691	1.40802	0	4.60911	SCRNASEQ: Hurskainen_33692365_endothelial, RNASEQ: Dong_36157523, MICROARRAY: Denervaud_26353077_up_ranked
SLPI	0	0	0	0	0	0	1.69115	0	0	0	0	0	0	0	0	0	0	0	0	0	0	0	0	0	0	0	0	0	1.45869	1.52158	0	1.36202	1.39163	1.38945	0	0	4.60436	SCRNASEQ: Hurskainen_33692365_endothelial, MICROARRAY: Denervaud_26353077_up_ranked, RNASEQ: Nitkin_32753701_24hr_unranked
MMP9	0	0	0	0	0	0	1.69115	0	0	0	0	0	0	0	1.44272	0	0	0	0	0	0	0	0	0	0	0	0	0	0	1.52158	0	1.46074	1.39133	1.38917	0	0	4.60405	SCRNASEQ: Hurskainen_33692365_endothelial, MICROARRAY: Denervaud_26353077_up_ranked, RNASEQ: Nitkin_32753701_24hr_unranked
LSP1	0	0	1.56066	0	0	0	0	0	0	0	0	0	0	1.45132	0	0	0	0	0	0	0	0	0	0	0	0	0	0	1.5748	0	0	0	0	0	0	1.44801	4.58347	MICROARRAY: Bao_27137150, SCRNASEQ: Scaffa_34417156_ranked, RNASEQ: Hirani_37876024
Clec4a3	0	0	0	0	0	0	1.69115	0	0	0	0	0	0	0	1.44276	0	0	0	0	0	0	0	0	0	0	0	0	0	0	0	0	0	0	0	0	1.44767	4.58158	SCRNASEQ: Scaffa_34417156_ranked, MICROARRAY: Denervaud_26353077_up_ranked, RNASEQ: Al_mudares_37368978_male
TMEM37	0	0	0	0	0	0	0	0	0	0	0	0	1.73795	0	0	0	0	0	0	0	0	0	0	0	0	0	0	0	1.42331	0	0	0	1.41101	1.4084	1.4097	0	4.57226	SCRNASEQ: Hurskainen_33692365_endothelial, MICROARRAY: Shrestha_33446917_up, RNASEQ: Hirani_37876024
LEF1	0	0	0	0	0	0	0	0	0	0	0	1.65479	0	0	0	0	0	0	0	0	0	0	0	0	0	0	0	0	1.47306	0	0	0	0	0	0	1.44239	4.57025	MICROARRAY: Shrestha_33446917_down_, SCRNASEQ: Scaffa_34417156_ranked, RNASEQ: Hirani_37876024
PLEK	0	0	0	0	0	0	1.69115	0	0	0	0	0	0	0	0	0	0	0	0	0	0	0	0	0	0	0	0	0	0	0	0	1.43136	0	0	0	1.44552	4.56802	SCRNASEQ: Scaffa_34417156_ranked, MICROARRAY: Denervaud_26353077_up_ranked, RNASEQ: Rao_37310763_ranked
EMP1	0	0	0	0	0	0	0	0	0	0	0	0	1.73795	0	0	0	0	0	0	0	0	0	0	0	0	0	0	0	0	0	0	1.37929	0	0	0	1.44959	4.56683	SCRNASEQ: Scaffa_34417156_ranked, MICROARRAY: Shrestha_33446917_up, RNASEQ: Rao_37310763_ranked
CHIA	0	0	0	0	0	0	1.69115	0	0	0	0	0	0	0	0	0	0	0	0	0	0	0	0	0	0	0	0	0	1.42727	0	0	0	0	0	0	1.44729	4.56571	SCRNASEQ: Scaffa_34417156_ranked, MICROARRAY: Denervaud_26353077_up_ranked, RNASEQ: Hirani_37876024
PGLYRP1	0	0	0	0	0	0	1.69115	0	0	0	0	0	0	0	0	0	0	0	0	0	0	0	0	0	0	0	0	0	1.42445	0	0	1.3929	0	0	0	1.4475	4.56309	SCRNASEQ: Scaffa_34417156_ranked, MICROARRAY: Denervaud_26353077_up_ranked, RNASEQ: Hirani_37876024
PIGR	0	0	0	0	0	0	1.69115	0	0	0	0	0	0	0	0	0	0	0	0	0	0	0	0	0	0	0	0	0	1.44318	0	0	0	1.4106	1.40798	1.40922	0	4.54493	SCRNASEQ: Hurskainen_33692365_endothelial, MICROARRAY: Denervaud_26353077_up_ranked, RNASEQ: Hirani_37876024
KLF2	0	0	0	0	0	0	0	0	0	0	0	1.66179	0	0	0	0	0	0	0	0	0	0	0	0	0	0	0	0	1.42818	0	0	0	0	0	0	1.44746	4.53743	MICROARRAY: Shrestha_33446917_down_, SCRNASEQ: Scaffa_34417156_ranked, RNASEQ: Hirani_37876024
PRSS35	0	0	0	0	0	0	0	1.59486	0	0	0	0	0	0	0	1.49302	0	0	0	0	0	0	0	0	0	0	0	0	1.49564	0	0	0	0	0	0	1.44407	4.53457	RNASEQ: Hirani_37876024, MICROARRAY: Natarajan_28851267_down, SCRNASEQ: Scaffa_34417156_ranked
FGD4	0	1.55983	0	0	1.52769	0	0	0	0	0	0	0	0	0	1.44383	0	0	0	0	0	0	0	0	0	0	0	0	0	0	0	0	0	0	0	0	0	4.53135	METHYLATION: Chen28689251, MICROARRAY: Chao27770432, RNASEQ: Al_mudares_37368978_male
SYK	0	1.55983	0	0	0	0	0	0	0	0	0	0	0	0	0	0	0	0	0	0	0	0	0	0	0	0	0	0	0	1.52158	0	0	0	0	0	1.44821	4.52962	METHYLATION: Chen28689251, SCRNASEQ: Scaffa_34417156_ranked, RNASEQ: Nitkin_32753701_24hr_unranked
PLA2G7	0	1.55983	0	0	0	0	0	0	0	0	0	0	0	1.4444	0	0	0	0	0	0	0	0	0	0	0	0	0	0	0	1.52158	0	1.3617	0	0	0	1.44756	4.52897	METHYLATION: Chen28689251, SCRNASEQ: Scaffa_34417156_ranked, RNASEQ: Nitkin_32753701_24hr_unranked
NRCAM	0	1.55983	0	0	0	0	0	0	0	0	0	0	0	0	0	0	0	0	0	0	0	0	0	0	0	0	0	0	0	1.52158	0	0	0	0	0	1.44603	4.52744	METHYLATION: Chen28689251, SCRNASEQ: Scaffa_34417156_ranked, RNASEQ: Nitkin_32753701_24hr_unranked
MMP2	0	0	0	0	0	0	0	0	0	0	1.619	0	0	1.46163	0	0	0	0	0	0	0	0	0	0	0	0	0	0	0	0	0	0	0	0	0	1.44588	4.52651	SCRNASEQ: Scaffa_34417156_ranked, RNASEQ: Al_mudares_37368978_female, MICROARRAY: Revhaug_31454811_up_ranked
ANGPTL2	0	1.55983	0	0	0	0	0	0	0	0	0	0	0	0	0	1.49302	0	0	0	0	0	0	0	0	0	0	0	0	1.47024	1.52158	0	1.42801	1.40172	1.39931	1.39889	1.44449	4.5259	METHYLATION: Chen28689251, SCRNASEQ: Scaffa_34417156_ranked, RNASEQ: Nitkin_32753701_24hr_unranked
STAT3	0	1.55983	0	0	0	0	0	0	0	0	0	0	0	0	1.44431	0	0	0	0	0	0	0	0	0	0	0	0	0	1.43508	1.52158	0	0	0	0	0	1.4421	4.52352	METHYLATION: Chen28689251, SCRNASEQ: Scaffa_34417156_ranked, RNASEQ: Nitkin_32753701_24hr_unranked
MS4A1	0	0	0	0	0	0	1.69115	0	0	1.60759	0	0	0	0	0	0	0	0	0	0	0	0	0	0	0	0	0	0	0	0	1.37591	1.38329	0	0	0	1.44802	4.52246	MICROARRAY: Denervaud_26353077_up_ranked, SCRNASEQ: Scaffa_34417156_ranked, RNASEQ: Rao_37310763_ranked
CPM	0	1.55983	0	0	0	0	0	0	0	0	0	0	0	0	0	0	0	0	0	0	0	0	0	0	0	1.50841	0	0	0	0	0	0	0	0	0	1.44736	4.5156	METHYLATION: Chen28689251, SCRNASEQ: Scaffa_34417156_ranked, RNASEQ: Dong_36157523
ANKRD44	0	0	0	0	0	0	0	0	0	1.60757	0	0	0	0	0	1.49302	0	0	0	0	0	0	0	0	0	0	0	0	1.45349	0	0	0	1.41471	1.41214	1.41403	0	4.5153	MICROARRAY: Revhaug_31454811_down_ranked, SCRNASEQ: Hurskainen_33692365_endothelial, RNASEQ: Bhattacharya_25150061
PLAC8	0	0	0	0	0	0	1.69115	0	0	0	0	0	0	0	0	0	0	0	0	0	0	0	0	0	0	0	0	0	0	0	1.37591	0	0	0	0	1.44801	4.51507	SCRNASEQ: Scaffa_34417156_ranked, RNASEQ: Nitkin_32753701_6hr_unranked, MICROARRAY: Denervaud_26353077_up_ranked
FMO2	0	0	0	0	0	0	1.69115	0	0	0	0	0	0	0	0	0	0	0	0	0	0	0	0	0	0	0	0	0	0	0	1.37591	0	1.40827	1.40566	1.40645	1.44698	4.51404	SCRNASEQ: Scaffa_34417156_ranked, RNASEQ: Nitkin_32753701_6hr_unranked, MICROARRAY: Denervaud_26353077_up_ranked
FCRLA	0	0	0	0	0	0	1.69115	0	0	0	0	0	0	0	0	0	0	0	0	0	0	0	0	0	0	0	0	0	0	0	0	1.37367	1.40757	1.405	1.40563	1.4488	4.51362	SCRNASEQ: Scaffa_34417156_ranked, MICROARRAY: Denervaud_26353077_up_ranked, RNASEQ: Rao_37310763_ranked
BANK1	0	0	0	0	0	0	1.69115	0	0	1.60757	0	0	0	0	0	0	0	0	0	0	0	0	0	0	0	0	0	0	0	0	0	1.37039	0	0	0	1.44894	4.51048	MICROARRAY: Denervaud_26353077_up_ranked, SCRNASEQ: Scaffa_34417156_ranked, RNASEQ: Rao_37310763_ranked
IL18RAP	0	0	0	0	0	0	1.69115	0	0	0	0	0	0	0	0	0	0	0	0	0	0	0	0	0	0	0	0	0	0	0	0	1.39927	1.41536	1.41276	1.41474	0	4.50578	SCRNASEQ: Hurskainen_33692365_endothelial, MICROARRAY: Denervaud_26353077_up_ranked, RNASEQ: Rao_37310763_ranked
CD53	0	0	0	0	0	0	1.69115	0	0	0	0	0	0	0	0	0	0	0	0	0	0	0	0	0	0	0	0	0	0	0	0	1.3627	0	0	0	1.44768	4.50152	SCRNASEQ: Scaffa_34417156_ranked, MICROARRAY: Denervaud_26353077_up_ranked, RNASEQ: Rao_37310763_ranked
BHLHE40	0	1.55983	0	0	0	0	0	0	0	0	0	0	0	0	1.44345	1.49302	0	0	0	0	0	0	0	0	0	0	0	0	1.45525	0	0	0	0	0	0	1.44571	4.49856	METHYLATION: Chen28689251, RNASEQ: Bhattacharya_25150061, SCRNASEQ: Scaffa_34417156_ranked
RASGRP1	0	0	0	0	0	0	0	0	0	1.60757	0	0	0	0	0	1.49302	0	0	0	0	0	0	0	0	0	0	0	0	0	0	0	0	1.39701	1.39476	1.39346	0	4.4976	MICROARRAY: Revhaug_31454811_down_ranked, SCRNASEQ: Hurskainen_33692365_endothelial, RNASEQ: Bhattacharya_25150061
GUCY1A1	0	1.55983	0	0	0	0	0	0	0	0	0	0	0	1.44972	0	1.49302	0	0	0	0	0	0	0	0	0	0	0	0	1.44099	0	0	0	0	0	0	1.44417	4.49702	METHYLATION: Chen28689251, RNASEQ: Bhattacharya_25150061, SCRNASEQ: Scaffa_34417156_ranked
ADGRG2	0	1.55983	0	0	0	0	0	0	0	0	0	0	0	0	0	1.49302	0	0	0	0	0	0	0	0	0	0	0	0	1.42815	0	0	0	0	0	0	1.44293	4.49578	METHYLATION: Chen28689251, RNASEQ: Bhattacharya_25150061, SCRNASEQ: Scaffa_34417156_ranked
CASP8	0	1.55983	0	0	0	0	0	0	0	0	0	0	0	0	0	0	0	0	0	0	0	0	0	0	0	0	0	0	0	1.52158	0	1.36372	1.41436	1.41178	1.41361	0	4.49577	METHYLATION: Chen28689251, SCRNASEQ: Hurskainen_33692365_endothelial, RNASEQ: Nitkin_32753701_24hr_unranked
SULF1	0	1.55983	0	0	0	0	0	0	0	0	0	0	0	0	0	0	0	0	0	0	0	0	0	0	0	1.50841	0	0	0	0	0	0	1.41665	1.41401	1.41623	0	4.48489	METHYLATION: Chen28689251, SCRNASEQ: Hurskainen_33692365_endothelial, RNASEQ: Dong_36157523
CD82	0	1.55983	0	0	0	0	0	0	0	0	0	0	0	0	0	0	0	0	0	0	0	0	0	0	0	0	0	0	1.43745	1.52158	0	0	1.39813	1.39579	1.39476	0	4.47954	METHYLATION: Chen28689251, SCRNASEQ: Hurskainen_33692365_endothelial, RNASEQ: Nitkin_32753701_24hr_unranked
PDCD4	0	0	0	0	1.52769	0	0	0	0	0	0	0	0	0	0	0	0	0	0	0	0	0	0	0	0	0	0	0	1.49351	0	0	0	0	0	0	1.44811	4.46931	SCRNASEQ: Scaffa_34417156_ranked, MICROARRAY: Chao27770432, RNASEQ: Hirani_37876024
RAB7B	0	0	0	0	0	0	0	0	0	0	1.619	0	0	0	0	0	0	0	0	0	0	0	0	0	0	0	0	0	1.43425	0	0	0	1.41045	1.40786	1.40906	0	4.46371	SCRNASEQ: Hurskainen_33692365_endothelial, MICROARRAY: Revhaug_31454811_up_ranked, RNASEQ: Hirani_37876024
CD84	0	0	0	0	0	0	1.69115	0	0	0	0	0	0	0	0	0	0	0	0	0	0	0	0	0	0	0	0	0	0	0	0	1.36166	1.40714	1.40459	1.40514	0	4.45995	SCRNASEQ: Hurskainen_33692365_endothelial, MICROARRAY: Denervaud_26353077_up_ranked, RNASEQ: Rao_37310763_ranked
LARS2	0	1.55983	0	0	0	0	0	0	0	0	0	0	0	0	1.44468	0	0	0	0	0	0	0	0	0	0	0	0	0	0	0	0	0	0	0	0	1.45071	4.45522	METHYLATION: Chen28689251, SCRNASEQ: Scaffa_34417156_ranked, RNASEQ: Al_mudares_37368978_male
C15orf48	0	0	0	0	0	0	1.69115	0	0	0	0	0	0	0	0	0	0	0	0	0	0	0	0	0	0	0	0	0	0	0	0	1.36655	1.39583	1.39357	1.39207	0	4.45352	SCRNASEQ: Hurskainen_33692365_endothelial, MICROARRAY: Denervaud_26353077_up_ranked, RNASEQ: Rao_37310763_ranked
ZBTB20	0	1.55983	0	0	0	0	0	0	0	0	0	0	0	0	1.44407	0	0	0	0	0	0	0	0	0	0	0	0	0	0	0	0	0	0	0	0	1.44657	4.45047	METHYLATION: Chen28689251, SCRNASEQ: Scaffa_34417156_ranked, RNASEQ: Al_mudares_37368978_male
TSPAN18	0	1.55983	0	0	0	0	0	0	0	0	0	0	0	0	0	0	0	0	0	0	0	0	0	0	0	0	0	0	1.48984	0	0	0	1.39814	1.3958	1.39478	0	4.44781	METHYLATION: Chen28689251, SCRNASEQ: Hurskainen_33692365_endothelial, RNASEQ: Hirani_37876024
CTDSPL	0	1.55983	0	0	0	0	0	0	0	0	0	0	0	0	1.44416	0	0	0	0	0	0	0	0	0	0	0	0	0	0	0	0	0	0	0	0	1.44057	4.44456	METHYLATION: Chen28689251, SCRNASEQ: Scaffa_34417156_ranked, RNASEQ: Al_mudares_37368978_male
MAP4K4	0	1.55983	0	0	0	0	0	0	0	0	0	0	0	1.44167	0	0	0	0	0	0	0	0	0	0	0	0	0	0	0	0	0	0	1.41544	1.41284	1.41483	1.44282	4.44432	METHYLATION: Chen28689251, SCRNASEQ: Scaffa_34417156_ranked, RNASEQ: Al_mudares_37368978_female
GLCCI1	0	1.55983	0	0	0	0	0	0	0	0	0	0	0	0	0	0	0	0	0	0	0	0	0	0	0	0	0	0	1.43513	0	0	0	0	0	0	1.44855	4.44352	METHYLATION: Chen28689251, SCRNASEQ: Scaffa_34417156_ranked, RNASEQ: Hirani_37876024
SLITRK6	0	0	1.56066	0	0	0	0	0	0	0	0	0	0	0	0	0	0	0	0	0	0	0	0	0	0	0	0	0	1.4354	0	0	0	0	0	0	1.44522	4.44127	MICROARRAY: Bao_27137150, SCRNASEQ: Scaffa_34417156_ranked, RNASEQ: Hirani_37876024
GPR153	0	1.55983	0	0	0	0	0	0	0	0	0	0	0	0	0	0	0	0	0	0	0	0	0	0	0	0	0	0	1.438	0	0	0	0	0	0	1.44176	4.43959	METHYLATION: Chen28689251, SCRNASEQ: Scaffa_34417156_ranked, RNASEQ: Hirani_37876024
CREG1	0	0	0	0	1.52769	0	0	0	0	0	0	0	0	0	1.4437	1.49302	0	0	0	0	0	0	0	0	0	0	0	0	1.50379	0	0	0	1.40793	1.40535	1.40605	0	4.4394	SCRNASEQ: Hurskainen_33692365_endothelial, RNASEQ: Hirani_37876024, MICROARRAY: Chao27770432
PLSCR3	0	1.55983	0	0	0	0	0	0	0	0	0	0	0	0	0	0	0	0	0	0	0	0	0	0	0	0	0	0	1.43177	0	0	0	0	0	0	1.44488	4.43648	METHYLATION: Chen28689251, SCRNASEQ: Scaffa_34417156_ranked, RNASEQ: Hirani_37876024
FHL1	0	1.55983	0	0	0	0	0	0	0	0	0	0	0	0	0	0	0	0	0	0	0	0	0	0	0	0	0	0	1.42458	0	0	0	0	0	0	1.44821	4.43262	METHYLATION: Chen28689251, SCRNASEQ: Scaffa_34417156_ranked, RNASEQ: Hirani_37876024
RNF152	0	1.55983	0	0	0	0	0	0	0	0	0	0	0	0	0	0	0	0	0	0	0	0	0	0	0	0	0	0	1.42934	0	0	1.36329	1.41133	1.40871	1.41009	1.44274	4.43191	METHYLATION: Chen28689251, SCRNASEQ: Scaffa_34417156_ranked, RNASEQ: Hirani_37876024
GMFG	0	0	0	0	0	0	0	0	0	1.60757	0	0	0	0	0	0	0	0	0	0	0	0	0	0	0	0	0	0	0	0	0	1.37419	0	0	0	1.4481	4.42986	MICROARRAY: Revhaug_31454811_down_ranked, SCRNASEQ: Scaffa_34417156_ranked, RNASEQ: Rao_37310763_ranked
ANXA6	0	1.55983	0	0	0	0	0	0	0	0	0	0	0	0	0	0	0	0	0	0	0	0	0	0	0	0	0	0	1.42401	0	0	0	0	0	0	1.4459	4.42974	METHYLATION: Chen28689251, SCRNASEQ: Scaffa_34417156_ranked, RNASEQ: Hirani_37876024
CMTM3	0	1.55983	0	0	0	0	0	0	0	0	0	0	0	0	0	0	0	0	0	0	0	0	0	0	0	0	0	0	1.42858	0	0	0	0	0	0	1.44127	4.42969	METHYLATION: Chen28689251, SCRNASEQ: Scaffa_34417156_ranked, RNASEQ: Hirani_37876024
TSPAN14	0	1.55983	0	0	0	0	0	0	0	0	0	0	0	0	0	0	0	0	0	0	0	0	0	0	0	0	0	0	1.42132	0	0	0	0	0	0	1.44844	4.42959	METHYLATION: Chen28689251, SCRNASEQ: Scaffa_34417156_ranked, RNASEQ: Hirani_37876024
LHFPL2	0	1.55983	0	0	0	0	0	0	0	0	0	0	0	0	0	0	0	0	0	0	0	0	0	0	0	0	0	0	1.42767	0	0	0	0	0	0	1.4399	4.4274	METHYLATION: Chen28689251, SCRNASEQ: Scaffa_34417156_ranked, RNASEQ: Hirani_37876024
CENPF	0	0	1.56066	0	0	0	0	0	0	0	0	0	0	0	0	0	0	0	0	0	0	1.46029	0	0	0	0	0	0	0	0	0	0	1.40584	1.40333	1.4036	0	4.42678	MICROARRAY: Bao_27137150, SCRNASEQ: Hurskainen_33692365_endothelial, RNASEQ: Coarfa_28818871_male_down_day21
EHF	0	1.55983	0	0	0	0	0	0	0	0	0	0	0	0	0	0	0	0	0	0	0	0	0	0	0	0	0	0	1.465	0	0	0	1.39784	1.39551	1.39441	0	4.42268	METHYLATION: Chen28689251, SCRNASEQ: Hurskainen_33692365_endothelial, RNASEQ: Hirani_37876024
ATP6V1H	0	1.55983	0	0	0	0	0	0	0	0	0	0	0	0	0	0	0	0	0	0	0	0	0	0	0	0	0	0	1.44322	0	0	0	1.41689	1.41424	1.41655	0	4.41994	METHYLATION: Chen28689251, SCRNASEQ: Hurskainen_33692365_endothelial, RNASEQ: Hirani_37876024
RAPH1	0	1.55983	0	0	0	0	0	0	0	0	0	0	0	0	1.44407	0	0	0	0	0	0	0	0	0	0	0	0	0	0	0	0	0	1.41412	1.41155	1.41334	0	4.41803	METHYLATION: Chen28689251, SCRNASEQ: Hurskainen_33692365_endothelial, RNASEQ: Al_mudares_37368978_male
SKAP1	0	0	0	0	0	0	0	0	0	1.60757	0	0	0	0	0	0	0	0	0	0	0	0	0	0	0	0	0	0	0	0	0	1.36228	0	0	0	1.44813	4.41798	MICROARRAY: Revhaug_31454811_down_ranked, SCRNASEQ: Scaffa_34417156_ranked, RNASEQ: Rao_37310763_ranked
TFCP2L1	0	1.55983	0	0	0	0	0	0	0	0	0	0	0	0	1.44345	0	0	0	0	0	0	0	0	0	0	0	0	0	0	0	0	0	1.41112	1.40852	1.40984	0	4.4144	METHYLATION: Chen28689251, SCRNASEQ: Hurskainen_33692365_endothelial, RNASEQ: Al_mudares_37368978_male
RHBDD1	0	1.55983	0	0	0	0	0	0	0	0	0	0	0	0	0	0	0	0	0	0	0	0	0	0	0	0	0	0	1.44166	0	0	0	1.41272	1.41014	1.4117	0	4.41421	METHYLATION: Chen28689251, SCRNASEQ: Hurskainen_33692365_endothelial, RNASEQ: Hirani_37876024
FAM163A	0	1.55983	0	0	0	0	0	0	0	0	0	0	0	0	0	0	0	0	0	0	0	0	0	0	0	0	0	0	1.44539	0	0	0	1.40877	0	1.40709	0	4.41399	METHYLATION: Chen28689251, SCRNASEQ: Hurskainen_33692365_endothelial, RNASEQ: Hirani_37876024
DUSP19	0	1.55983	0	0	0	0	0	0	0	0	0	0	0	0	0	0	0	0	0	0	0	0	0	0	0	0	0	0	0	0	0	1.45387	1.39921	1.39686	1.39607	0	4.41291	METHYLATION: Chen28689251, SCRNASEQ: Hurskainen_33692365_endothelial, RNASEQ: Rao_37310763_ranked
ADRA1B	0	0	0	0	1.52769	0	0	0	0	0	0	0	0	0	0	0	0	0	0	0	0	0	0	0	0	0	0	0	1.43865	0	0	0	0	0	0	1.44546	4.4118	SCRNASEQ: Scaffa_34417156_ranked, MICROARRAY: Chao27770432, RNASEQ: Hirani_37876024
GLRX2	0	1.55983	0	0	0	0	0	0	0	0	0	0	0	1.44102	0	0	0	0	0	0	0	0	0	0	0	0	0	0	0	0	0	0	1.40941	1.40676	1.40782	0	4.41027	METHYLATION: Chen28689251, SCRNASEQ: Hurskainen_33692365_endothelial, RNASEQ: Al_mudares_37368978_female
GULP1	0	1.55983	0	0	0	0	0	0	0	0	0	0	0	0	0	0	0	0	0	0	0	0	0	0	0	0	0	0	1.43256	0	0	0	1.4151	1.41251	1.41445	0	4.40749	METHYLATION: Chen28689251, SCRNASEQ: Hurskainen_33692365_endothelial, RNASEQ: Hirani_37876024
ACSL3	0	1.55983	0	0	0	0	0	0	0	0	0	0	0	0	0	0	0	0	0	0	0	0	0	0	0	0	0	0	1.43304	0	0	0	1.41287	1.41029	1.41187	0	4.40575	METHYLATION: Chen28689251, SCRNASEQ: Hurskainen_33692365_endothelial, RNASEQ: Hirani_37876024
SPC25	0	0	1.56066	0	0	0	0	0	0	0	0	0	0	0	1.44476	0	0	0	0	0	0	0	0	0	0	0	0	0	0	0	0	0	1.40019	1.3978	1.39714	0	4.40562	MICROARRAY: Bao_27137150, SCRNASEQ: Hurskainen_33692365_endothelial, RNASEQ: Al_mudares_37368978_male
FAM117B	0	1.55983	0	0	0	0	0	0	0	0	0	0	0	0	0	0	0	0	0	0	0	0	0	0	0	0	0	0	1.42704	0	0	0	1.41422	1.41164	1.41344	0	4.40108	METHYLATION: Chen28689251, SCRNASEQ: Hurskainen_33692365_endothelial, RNASEQ: Hirani_37876024
TRIB3	0	0	1.56066	0	0	0	0	0	0	0	0	0	0	0	0	0	0	0	0	0	0	0	0	0	0	0	0	0	1.44445	0	0	0	1.39334	1.39114	1.3892	0	4.39845	MICROARRAY: Bao_27137150, SCRNASEQ: Hurskainen_33692365_endothelial, RNASEQ: Hirani_37876024
ZNF663	0	0	0	0	1.52769	0	0	0	0	0	0	0	0	0	0	0	0	0	0	0	0	0	0	0	0	0	0	0	1.47928	0	0	0	1.39124	0	0	0	4.39821	SCRNASEQ: Hurskainen_33692365_endothelial, MICROARRAY: Chao27770432, RNASEQ: Hirani_37876024
PTPN14	0	1.55983	0	0	0	0	0	0	0	0	0	0	0	0	0	0	0	0	0	0	0	0	0	0	0	0	0	0	1.4277	0	0	0	1.40582	1.40332	1.40359	0	4.39335	METHYLATION: Chen28689251, SCRNASEQ: Hurskainen_33692365_endothelial, RNASEQ: Hirani_37876024
LYPD6B	0	1.55983	0	0	0	0	0	0	0	0	0	0	0	0	0	0	0	0	0	0	0	0	0	0	0	0	0	0	1.43249	0	0	0	1.40094	1.39853	1.39802	0	4.39326	METHYLATION: Chen28689251, SCRNASEQ: Hurskainen_33692365_endothelial, RNASEQ: Hirani_37876024
PTPRT	0	1.55983	0	0	0	0	0	0	0	0	0	0	0	0	0	0	0	0	0	0	0	0	0	0	0	0	0	0	1.44005	0	0	0	1.39189	1.38973	0	0	4.39177	METHYLATION: Chen28689251, SCRNASEQ: Hurskainen_33692365_endothelial, RNASEQ: Hirani_37876024
LRRC4C	0	1.55983	0	0	0	0	0	0	0	0	0	0	0	0	0	0	0	0	0	0	0	0	0	0	0	0	0	0	1.43595	0	0	0	0	0	1.39462	0	4.3904	METHYLATION: Chen28689251, SCRNASEQ: Hurskainen_33692365_stroma, RNASEQ: Hirani_37876024
OSBPL6	0	1.55983	0	0	0	0	0	0	0	0	0	0	0	0	0	0	0	0	0	0	0	0	0	0	0	0	0	0	1.43093	0	0	0	1.39946	1.3971	1.39634	0	4.39022	METHYLATION: Chen28689251, SCRNASEQ: Hurskainen_33692365_endothelial, RNASEQ: Hirani_37876024
THNSL1	0	1.55983	0	0	0	0	0	0	0	0	0	0	0	0	0	0	0	0	0	0	0	0	0	0	0	0	0	0	1.42326	0	0	0	1.40436	1.40188	1.4019	0	4.38746	METHYLATION: Chen28689251, SCRNASEQ: Hurskainen_33692365_endothelial, RNASEQ: Hirani_37876024
NEK6	0	1.55983	0	0	0	0	0	0	0	0	0	0	0	0	0	0	0	0	0	0	0	0	0	0	0	0	0	0	1.42072	0	0	0	1.40121	1.3988	1.39831	0	4.38176	METHYLATION: Chen28689251, SCRNASEQ: Hurskainen_33692365_endothelial, RNASEQ: Hirani_37876024
RIN2	0	1.55983	0	0	0	0	0	0	0	0	0	0	0	0	0	0	0	0	0	0	0	0	0	0	0	0	0	0	1.42531	0	0	0	1.39393	1.39173	1.38992	0	4.37907	METHYLATION: Chen28689251, SCRNASEQ: Hurskainen_33692365_endothelial, RNASEQ: Hirani_37876024
CHD6	0	1.55983	0	0	0	0	0	0	0	0	0	0	0	0	0	0	0	0	0	0	0	0	0	0	0	0	0	0	1.42279	0	0	1.37133	1.39191	1.38974	0	0	4.37453	METHYLATION: Chen28689251, SCRNASEQ: Hurskainen_33692365_endothelial, RNASEQ: Hirani_37876024
BACH2	0	1.55983	0	0	0	0	0	0	0	0	0	0	0	0	0	0	0	0	0	0	0	0	0	0	0	0	0	0	0	0	0	1.36562	0	0	0	1.44857	4.37402	METHYLATION: Chen28689251, SCRNASEQ: Scaffa_34417156_ranked, RNASEQ: Rao_37310763_ranked
ABCD2	0	1.55983	0	0	0	0	0	0	0	0	0	0	0	0	0	0	0	0	0	0	0	0	0	0	0	0	0	0	0	0	0	1.36473	0	0	0	1.44877	4.37333	METHYLATION: Chen28689251, SCRNASEQ: Scaffa_34417156_ranked, RNASEQ: Rao_37310763_ranked
SHC4	0	0	0	0	1.52769	0	0	0	0	0	0	0	0	0	0	0	0	0	0	0	0	0	0	0	0	0	0	0	1.4472	0	0	0	1.3957	1.39343	1.39191	0	4.37058	SCRNASEQ: Hurskainen_33692365_endothelial, MICROARRAY: Chao27770432, RNASEQ: Hirani_37876024
ENC1	0	1.55983	0	0	0	0	0	0	0	0	0	0	0	0	0	0	0	0	0	0	0	0	0	0	0	0	0	0	0	0	0	1.36617	0	0	0	1.44375	4.36975	METHYLATION: Chen28689251, SCRNASEQ: Scaffa_34417156_ranked, RNASEQ: Rao_37310763_ranked
COX6A1	0	1.55983	0	0	0	0	0	0	0	0	0	0	0	0	0	0	0	0	0	0	0	0	0	0	0	0	0	0	0	0	0	1.3617	0	0	0	1.44608	4.36762	METHYLATION: Chen28689251, SCRNASEQ: Scaffa_34417156_ranked, RNASEQ: Rao_37310763_ranked
FOXJ2	0	1.55983	0	0	0	0	0	0	0	0	0	0	0	0	0	0	0	0	0	0	0	0	0	0	0	0	0	0	0	0	0	1.36183	0	0	0	1.44324	4.36491	METHYLATION: Chen28689251, SCRNASEQ: Scaffa_34417156_ranked, RNASEQ: Rao_37310763_ranked
LYAR	0	1.55983	0	0	0	0	0	0	0	0	0	0	0	0	0	0	0	0	0	0	0	0	0	0	0	0	0	0	0	0	0	1.36172	0	0	0	1.44093	4.36248	METHYLATION: Chen28689251, SCRNASEQ: Scaffa_34417156_ranked, RNASEQ: Rao_37310763_ranked
MFSD6	0	1.55983	0	0	0	0	0	0	0	0	0	0	0	0	0	0	0	0	0	0	0	0	0	0	0	0	0	0	0	0	0	1.36298	1.4149	1.41231	1.41423	0	4.33771	METHYLATION: Chen28689251, SCRNASEQ: Hurskainen_33692365_endothelial, RNASEQ: Rao_37310763_ranked
ICOS	0	1.55983	0	0	0	0	0	0	0	0	0	0	0	0	0	0	0	0	0	0	0	0	0	0	0	0	0	0	0	0	0	1.36175	1.41408	1.41151	1.41329	0	4.33566	METHYLATION: Chen28689251, SCRNASEQ: Hurskainen_33692365_endothelial, RNASEQ: Rao_37310763_ranked
HDAC4	0	1.55983	0	0	0	0	0	0	0	0	0	0	0	0	0	0	0	0	0	0	0	0	0	0	0	0	0	0	0	0	0	1.36314	1.41179	1.40917	1.41063	0	4.33477	METHYLATION: Chen28689251, SCRNASEQ: Hurskainen_33692365_endothelial, RNASEQ: Rao_37310763_ranked
TAF1A	0	1.55983	0	0	0	0	0	0	0	0	0	0	0	0	0	0	0	0	0	0	0	0	0	0	0	0	0	0	0	0	0	1.36459	1.40611	1.4036	1.4039	0	4.33053	METHYLATION: Chen28689251, SCRNASEQ: Hurskainen_33692365_endothelial, RNASEQ: Rao_37310763_ranked
ARL5A	0	1.55983	0	0	0	0	0	0	0	0	0	0	0	0	0	0	0	0	0	0	0	0	0	0	0	0	0	0	0	0	0	1.36175	1.40083	1.39841	1.39789	0	4.32241	METHYLATION: Chen28689251, SCRNASEQ: Hurskainen_33692365_endothelial, RNASEQ: Rao_37310763_ranked
HSPA12B	0	1.55983	0	0	0	0	0	0	0	0	0	0	0	0	0	0	0	0	0	0	0	0	0	0	0	0	0	0	0	0	0	1.3637	1.39472	1.39249	1.39082	0	4.31826	METHYLATION: Chen28689251, SCRNASEQ: Hurskainen_33692365_endothelial, RNASEQ: Rao_37310763_ranked
POLR3F	0	1.55983	0	0	0	0	0	0	0	0	0	0	0	0	0	0	0	0	0	0	0	0	0	0	0	0	0	0	0	0	0	1.36167	1.39403	1.39182	1.39002	0	4.31553	METHYLATION: Chen28689251, SCRNASEQ: Hurskainen_33692365_endothelial, RNASEQ: Rao_37310763_ranked
RBPJL	0	1.55983	0	0	0	0	0	0	0	0	0	0	0	0	0	0	0	0	0	0	0	0	0	0	0	0	0	0	0	0	0	1.3617	1.39161	1.38942	0	0	4.31313	METHYLATION: Chen28689251, SCRNASEQ: Hurskainen_33692365_endothelial, RNASEQ: Rao_37310763_ranked
LHX6	0	0	0	0	1.52769	0	0	0	0	0	0	0	0	0	0	0	0	0	0	0	0	0	0	0	0	0	0	0	0	0	0	1.38289	1.40139	1.39898	1.39851	0	4.31197	SCRNASEQ: Hurskainen_33692365_endothelial, RNASEQ: Rao_37310763_ranked, MICROARRAY: Chao27770432
GALNT16	0	0	0	0	0	2.02364	0	0	0	0	0	0	0	0	0	1.49302	0	0	0	0	0	0	0	0	0	0	0	0	1.46698	0	0	1.39174	0	0	0	0	3.51666	RNASEQ: Bhattacharya_25150061, MICROARRAY: Denervaud_26353077_down_ranked
SERPINA3	0	0	0	0	0	0	0	0	1.92166	0	0	0	0	0	0	0	0	0	0	0	0	0	0	0	0	0	0	0	1.57212	1.52158	0	1.40542	0	0	0	0	3.49378	MICROARRAY: Natarajan_28851267_up, RNASEQ: Hirani_37876024
ADAMTS5	0	0	0	0	0	1.99798	0	0	0	0	0	0	0	0	0	1.49302	0	0	0	0	0	0	0	0	0	0	0	0	1.43162	0	0	0	0	0	0	0	3.49099	RNASEQ: Bhattacharya_25150061, MICROARRAY: Denervaud_26353077_down_ranked
HSPA8	0	0	0	0	0	0	0	0	0	0	0	0	0	1.8623	1.44292	0	0	0	0	0	0	0	0	0	0	0	0	0	0	0	0	0	0	0	0	1.62198	3.48428	SCRNASEQ: Scaffa_34417156_ranked, RNASEQ: Al_mudares_37368978_female
ANKRD1	0	0	0	0	0	0	0	0	2.01714	0	0	0	0	1.44381	1.44295	0	0	0	0	0	0	0	0	0	0	0	0	0	1.42522	0	0	0	0	0	0	0	3.46095	MICROARRAY: Natarajan_28851267_up, RNASEQ: Al_mudares_37368978_female
Abcb1b	0	0	0	0	0	0	0	0	1.9694	0	0	0	0	0	0	0	0	0	0	0	0	0	0	0	0	0	0	0	1.49147	0	0	1.36242	0	0	0	0	3.46088	MICROARRAY: Natarajan_28851267_up, RNASEQ: Hirani_37876024
OPCML	0	0	0	0	0	2.01509	0	0	0	0	0	0	0	0	0	0	0	0	0	0	0	0	0	0	0	0	0	0	0	0	0	0	0	0	0	1.44534	3.46043	SCRNASEQ: Scaffa_34417156_ranked, MICROARRAY: Denervaud_26353077_down_ranked
GPNMB	0	0	0	1.84727	0	0	0	0	0	0	0	0	0	0	0	0	0	0	0	0	0	0	0	0	0	1.50841	0	0	1.61295	0	0	0	0	0	0	0	3.46022	RNASEQ: Hirani_37876024, MICROARRAY: Bhaskaran_22911455
CD109	0	0	0	0	0	2.00653	0	0	0	0	0	0	0	0	0	0	0	0	0	0	0	0	0	0	0	0	0	0	1.45307	0	0	1.36166	0	0	0	0	3.4596	MICROARRAY: Denervaud_26353077_down_ranked, RNASEQ: Hirani_37876024
MDGA2	0	0	0	0	0	2.04931	0	0	0	0	0	0	0	0	0	0	0	0	0	0	0	0	1.39637	0	0	0	0	0	0	0	0	0	0	0	0	0	3.44568	MICROARRAY: Denervaud_26353077_down_ranked, RNASEQ: Coarfa_28818871_male_down_day7
CH25H	0	0	0	0	0	0	0	0	2.06488	0	0	0	0	0	0	0	0	0	0	0	0	0	0	0	0	0	0	0	0	0	0	1.367	0	0	0	0	3.43188	MICROARRAY: Natarajan_28851267_up, RNASEQ: Rao_37310763_ranked
SCUBE2	0	0	0	0	0	1.98942	0	0	0	0	0	0	0	0	0	0	0	0	0	0	0	0	0	0	0	0	0	0	1.43347	0	0	0	0	0	0	0	3.42289	MICROARRAY: Denervaud_26353077_down_ranked, RNASEQ: Hirani_37876024
RRAD	0	0	0	0	0	1.96375	0	0	0	0	0	0	0	0	0	0	0	0	0	0	0	0	0	0	0	0	0	0	0	0	0	0	0	0	0	1.44209	3.40584	SCRNASEQ: Scaffa_34417156_ranked, MICROARRAY: Denervaud_26353077_down_ranked
ESR1	0	0	0	0	0	1.88676	0	0	0	0	0	0	0	0	0	0	0	0	0	0	0	0	0	0	0	0	0	0	0	0	0	1.50793	0	0	0	0	3.39468	MICROARRAY: Denervaud_26353077_down_ranked, RNASEQ: Rao_37310763_ranked
PRRG1	0	1.55983	0	0	0	0	0	0	0	0	0	0	0	0	1.83467	0	0	0	0	0	0	0	0	0	0	0	0	0	1.42455	0	0	0	0	0	0	0	3.39451	METHYLATION: Chen28689251, RNASEQ: Al_mudares_37368978_male
C4A	0	0	0	1.84727	0	0	1.69115	0	0	0	0	0	0	0	0	0	0	0	0	0	0	0	0	0	0	1.50841	0	0	0	0	0	0	0	0	0	0	3.35567	RNASEQ: Dong_36157523, MICROARRAY: Bhaskaran_22911455
TRPC3	0	0	0	0	0	1.91242	0	0	0	0	0	0	0	0	0	0	0	0	0	0	0	0	0	0	0	0	0	0	1.44117	0	0	0	0	0	0	0	3.35359	MICROARRAY: Denervaud_26353077_down_ranked, RNASEQ: Hirani_37876024
KCNJ5	0	0	0	0	0	1.92098	0	0	0	0	0	0	0	0	0	0	0	0	0	0	0	0	0	0	0	0	0	0	1.42439	0	0	0	0	0	0	0	3.34537	MICROARRAY: Denervaud_26353077_down_ranked, RNASEQ: Hirani_37876024
CCL5	0	0	0	0	0	0	1.82264	0	0	0	0	0	0	0	0	0	0	0	0	0	0	0	0	0	0	0	0	0	0	1.52158	0	0	0	0	0	0	3.34421	MICROARRAY: Denervaud_26353077_up_ranked, RNASEQ: Nitkin_32753701_24hr_unranked
C1QB	0	0	0	1.84727	0	0	1.69115	0	0	0	0	0	0	0	0	1.49302	0	0	0	0	0	0	0	0	0	0	0	0	1.42148	0	0	0	0	0	0	0	3.34029	RNASEQ: Bhattacharya_25150061, MICROARRAY: Bhaskaran_22911455
CILP	0	0	0	0	0	1.89531	0	0	0	0	0	0	0	0	0	0	0	0	0	0	0	0	0	0	0	0	0	0	1.43794	0	0	1.36355	0	0	0	0	3.33325	MICROARRAY: Denervaud_26353077_down_ranked, RNASEQ: Hirani_37876024
MMP12	0	0	0	0	0	1.80976	0	0	0	0	0	0	1.73795	0	0	0	0	0	0	0	0	0	0	0	0	0	0	0	0	1.52158	0	0	0	0	0	0	3.33134	MICROARRAY: Denervaud_26353077_down_ranked, RNASEQ: Nitkin_32753701_24hr_unranked
BEX4	0	0	0	0	0	1.86965	0	0	0	0	0	0	0	0	0	0	0	0	0	0	0	0	0	0	0	0	0	0	0	0	0	0	0	0	0	1.44937	3.31901	SCRNASEQ: Scaffa_34417156_ranked, MICROARRAY: Denervaud_26353077_down_ranked
CMA1	0	0	0	0	0	0	0	0	0	0	0	0	1.73795	0	0	1.49302	0	0	0	0	0	0	0	0	0	0	0	0	1.57941	1.52158	0	0	0	0	0	0	3.31736	RNASEQ: Hirani_37876024, MICROARRAY: Shrestha_33446917_up
MYBPHL	0	0	0	0	0	0	0	0	0	1.8376	0	0	0	1.46316	1.44256	0	0	0	0	0	0	0	0	0	0	0	0	0	0	0	0	0	0	0	0	0	3.30077	MICROARRAY: Revhaug_31454811_down_ranked, RNASEQ: Al_mudares_37368978_female
S100A10	0	0	0	1.84727	0	0	0	0	0	0	0	0	0	0	0	0	0	0	0	0	0	0	0	0	0	0	0	0	0	0	0	0	0	0	0	1.45098	3.29825	SCRNASEQ: Scaffa_34417156_ranked, MICROARRAY: Bhaskaran_22911455
VIM	0	0	0	1.84727	0	0	0	0	0	0	0	0	0	0	0	0	0	0	0	0	0	0	0	0	0	0	0	0	0	0	0	0	1.40468	1.4022	1.40228	1.45032	3.29759	SCRNASEQ: Scaffa_34417156_ranked, MICROARRAY: Bhaskaran_22911455
GPR182	0	0	0	1.84727	0	0	0	0	0	0	0	0	0	0	0	0	0	0	0	0	0	0	0	0	0	0	0	0	1.44807	0	0	0	0	0	0	0	3.29534	MICROARRAY: Bhaskaran_22911455, RNASEQ: Hirani_37876024
S100A1	0	0	0	1.84727	0	0	0	0	0	0	0	0	0	0	0	0	0	0	0	0	0	0	0	0	0	0	0	0	0	0	0	0	0	0	0	1.44593	3.2932	SCRNASEQ: Scaffa_34417156_ranked, MICROARRAY: Bhaskaran_22911455
ATP1B1	0	0	0	1.84727	0	0	0	0	0	0	0	0	0	0	0	0	0	0	0	0	0	0	0	0	0	0	0	0	0	0	0	0	1.40807	1.40549	1.40621	1.44582	3.29309	SCRNASEQ: Scaffa_34417156_ranked, MICROARRAY: Bhaskaran_22911455
TIMP1	0	0	0	1.84727	0	0	1.69115	0	0	0	0	0	1.73795	0	0	0	0	0	0	0	0	0	0	0	0	0	0	0	1.43638	0	0	1.44555	0	0	0	0	3.29282	MICROARRAY: Bhaskaran_22911455, RNASEQ: Rao_37310763_ranked
SFTPD	0	0	0	1.84727	0	0	0	0	0	0	0	0	0	0	1.44389	0	0	0	0	0	0	0	0	0	0	0	0	0	0	0	0	0	0	0	0	0	3.29116	MICROARRAY: Bhaskaran_22911455, RNASEQ: Al_mudares_37368978_male
SOD2	0	0	0	1.84727	0	0	0	0	0	0	0	0	0	0	1.44347	0	0	0	0	0	0	0	0	0	0	0	0	0	1.43019	0	0	1.43215	0	0	0	0	3.29074	MICROARRAY: Bhaskaran_22911455, RNASEQ: Al_mudares_37368978_male
PGK1	0	0	0	1.84727	0	0	0	0	0	0	0	0	0	0	0	0	0	0	0	0	0	0	0	0	0	0	0	0	1.43499	0	0	0	0	0	0	0	3.28226	MICROARRAY: Bhaskaran_22911455, RNASEQ: Hirani_37876024
PRKAA2	0	0	0	1.84727	0	0	0	0	0	0	0	0	0	0	0	0	0	0	0	0	0	0	0	0	0	0	0	0	1.42967	0	0	0	0	0	0	0	3.27694	MICROARRAY: Bhaskaran_22911455, RNASEQ: Hirani_37876024
MAPK13	0	0	0	1.84727	0	0	0	0	0	0	0	0	0	0	0	0	0	0	0	0	0	0	0	0	0	0	0	0	1.42405	0	0	0	0	0	0	0	3.27132	MICROARRAY: Bhaskaran_22911455, RNASEQ: Hirani_37876024
SP4	0	0	0	1.84727	0	0	0	0	0	0	0	0	0	0	0	0	0	0	0	0	0	0	0	0	0	0	0	0	1.42189	0	0	0	0	0	0	0	3.26916	MICROARRAY: Bhaskaran_22911455, RNASEQ: Hirani_37876024
HOMER1	0	0	0	1.84727	0	0	0	0	0	0	0	0	0	0	0	0	0	0	0	0	0	0	0	0	0	0	0	0	1.42106	0	0	0	0	0	0	0	3.26833	MICROARRAY: Bhaskaran_22911455, RNASEQ: Hirani_37876024
GSTP1	0	0	0	1.84727	0	0	0	0	0	0	0	0	0	0	0	0	0	0	0	0	0	0	0	0	0	0	0	0	0	0	0	1.41784	0	0	0	0	3.26511	MICROARRAY: Bhaskaran_22911455, RNASEQ: Rao_37310763_ranked
GJB2	0	0	0	0	0	0	0	0	0	0	0	1.82602	0	0	0	0	0	0	0	0	0	0	0	0	0	0	0	0	1.43765	0	0	1.36235	0	0	0	0	3.26367	MICROARRAY: Shrestha_33446917_down_, RNASEQ: Hirani_37876024
CSF1	0	0	0	0	0	0	0	0	0	0	0	0	1.73795	0	0	0	0	0	0	0	0	0	0	0	0	0	0	0	0	1.52158	0	1.36366	0	0	0	0	3.25953	MICROARRAY: Shrestha_33446917_up, RNASEQ: Nitkin_32753701_24hr_unranked
CCL2	0	0	0	0	0	0	0	0	0	0	0	0	1.73795	0	0	0	0	0	0	0	0	0	0	0	0	0	0	0	0	1.52158	0	1.39885	0	0	0	0	3.25953	MICROARRAY: Shrestha_33446917_up, RNASEQ: Nitkin_32753701_24hr_unranked
HSPA5	0	0	0	0	0	0	0	0	0	0	0	0	0	1.80442	1.44341	0	0	0	0	0	0	0	0	0	0	0	0	0	0	0	0	0	1.40163	1.3992	1.39878	1.45089	3.25531	SCRNASEQ: Scaffa_34417156_ranked, RNASEQ: Al_mudares_37368978_female
AOC1	0	1.55983	0	0	0	0	1.69115	0	0	0	0	0	0	0	0	0	0	0	0	0	0	0	0	0	0	0	0	0	0	0	0	0	0	0	0	0	3.25098	METHYLATION: Chen28689251, MICROARRAY: Denervaud_26353077_up_ranked
S1PR5	0	0	0	0	0	0	0	0	0	0	0	1.72396	0	0	0	0	0	0	0	0	0	0	0	0	0	0	0	0	0	1.52158	0	0	0	0	0	0	3.24554	MICROARRAY: Shrestha_33446917_down_, RNASEQ: Nitkin_32753701_24hr_unranked
COL3A1	0	0	0	0	0	0	0	0	0	0	0	0	0	0	0	0	1.78878	0	0	0	0	0	0	0	0	1.50841	0	0	0	0	0	0	1.41508	1.41249	1.41444	1.44887	3.23765	RNASEQ: Cheng_31961470, SCRNASEQ: Scaffa_34417156_ranked
HSP90AB1	0	0	0	0	0	0	0	0	0	0	0	0	0	1.61697	0	0	0	0	0	0	0	0	0	0	0	0	0	0	0	0	0	0	0	0	0	1.60239	3.21936	SCRNASEQ: Scaffa_34417156_ranked, RNASEQ: Al_mudares_37368978_female
CDKN1A	0	0	1.56066	0	0	0	0	0	0	0	0	0	0	0	0	1.49302	0	0	0	0	0	0	0	0	0	0	0	0	1.6578	0	0	0	0	0	0	0	3.21846	MICROARRAY: Bao_27137150, RNASEQ: Hirani_37876024
PRKCB	0	0	0	0	0	0	1.69115	0	0	0	0	0	0	0	0	0	0	0	0	0	0	0	0	0	0	0	0	0	0	1.52158	0	0	0	0	0	0	3.21273	MICROARRAY: Denervaud_26353077_up_ranked, RNASEQ: Nitkin_32753701_24hr_unranked
C3AR1	0	0	0	0	0	0	1.69115	0	0	0	0	0	0	0	0	0	0	0	0	0	0	0	0	0	0	0	0	0	0	1.52158	0	0	0	0	0	0	3.21273	MICROARRAY: Denervaud_26353077_up_ranked, RNASEQ: Nitkin_32753701_24hr_unranked
S100A9	0	0	0	0	0	0	1.69115	0	0	0	0	0	0	1.44575	1.44264	0	0	0	0	0	0	0	0	0	0	0	0	0	0	1.52158	0	1.50303	0	0	0	0	3.21273	RNASEQ: Nitkin_32753701_24hr_unranked, MICROARRAY: Denervaud_26353077_up_ranked
ITGAM	0	0	0	0	1.52769	0	1.69115	0	0	0	0	0	0	0	0	0	0	0	0	0	0	0	0	0	0	0	0	0	0	1.52158	0	1.46573	0	0	0	0	3.21273	MICROARRAY: Denervaud_26353077_up_ranked, RNASEQ: Nitkin_32753701_24hr_unranked
C1QA	0	0	0	0	0	0	1.69115	0	0	0	0	0	0	0	0	0	0	0	0	0	0	0	0	0	0	0	0	0	1.4209	1.52158	0	0	0	0	0	0	3.21273	MICROARRAY: Denervaud_26353077_up_ranked, RNASEQ: Nitkin_32753701_24hr_unranked
MMP8	0	0	0	0	0	0	1.69115	0	0	0	0	0	0	0	0	0	0	0	0	0	0	0	0	0	0	0	0	0	0	1.52158	0	1.49373	0	0	0	0	3.21273	MICROARRAY: Denervaud_26353077_up_ranked, RNASEQ: Nitkin_32753701_24hr_unranked
Ngp	0	0	0	0	0	0	1.69115	0	0	0	0	0	0	0	0	0	0	0	0	0	0	0	0	0	0	0	0	0	0	1.52158	0	1.48551	0	0	0	0	3.21273	MICROARRAY: Denervaud_26353077_up_ranked, RNASEQ: Nitkin_32753701_24hr_unranked
S100A8	0	0	0	0	0	0	1.69115	0	0	0	0	0	0	0	1.4426	0	0	0	0	0	0	0	0	0	0	0	0	0	0	1.52158	0	1.49986	0	0	0	0	3.21273	MICROARRAY: Denervaud_26353077_up_ranked, RNASEQ: Nitkin_32753701_24hr_unranked
HAPLN1	0	1.55983	0	0	0	0	0	0	0	0	0	0	0	0	0	0	0	0	0	0	0	0	0	0	0	0	0	0	1.65052	0	0	0	0	0	0	0	3.21035	METHYLATION: Chen28689251, RNASEQ: Hirani_37876024
CCL7	0	0	0	0	0	0	0	0	0	0	0	0	1.73795	0	0	0	0	0	0	0	0	0	0	0	0	0	0	0	1.44453	0	0	1.47139	0	0	0	0	3.20935	MICROARRAY: Shrestha_33446917_up, RNASEQ: Rao_37310763_ranked
CRABP1	0	0	0	0	0	0	1.69115	0	0	0	0	0	0	0	0	0	0	0	0	0	0	0	0	0	0	0	0	0	1.51765	0	0	0	0	0	0	0	3.20879	MICROARRAY: Denervaud_26353077_up_ranked, RNASEQ: Hirani_37876024
TREML4	0	0	0	0	0	0	0	0	0	0	0	1.76312	0	0	1.44266	0	0	0	0	0	0	0	0	0	0	0	0	0	0	0	0	1.37083	0	0	0	0	3.20578	MICROARRAY: Shrestha_33446917_down_, RNASEQ: Al_mudares_37368978_male
ETNK2	0	0	0	0	0	1.79265	0	0	0	0	0	0	0	0	0	0	0	0	0	0	0	0	0	0	0	0	0	0	0	0	0	0	1.41016	1.40754	1.4087	0	3.20281	SCRNASEQ: Hurskainen_33692365_endothelial, MICROARRAY: Denervaud_26353077_down_ranked
Ccl9	0	0	0	0	0	0	1.69115	0	0	0	0	0	0	0	0	0	0	0	0	0	0	0	0	0	0	1.50841	0	0	1.43993	0	0	1.41087	0	0	0	0	3.19955	RNASEQ: Dong_36157523, MICROARRAY: Denervaud_26353077_up_ranked
Stfa3	0	0	0	0	0	0	1.69115	0	0	0	0	0	0	0	0	0	0	0	0	0	0	0	0	0	0	0	0	0	0	0	1.37591	1.50628	0	0	0	0	3.19742	RNASEQ: Rao_37310763_ranked, MICROARRAY: Denervaud_26353077_up_ranked
DGLUCY	0	1.55983	0	0	0	0	0	0	0	0	0	0	0	0	0	0	0	0	0	0	0	0	0	0	0	0	0	0	1.63537	0	0	1.36871	0	0	0	0	3.1952	METHYLATION: Chen28689251, RNASEQ: Hirani_37876024
Retnlg	0	0	0	0	0	0	1.69115	0	0	0	0	0	0	0	1.44275	0	0	0	0	0	0	0	0	0	0	0	0	0	0	0	0	1.50197	0	0	0	0	3.19311	MICROARRAY: Denervaud_26353077_up_ranked, RNASEQ: Rao_37310763_ranked
GDF15	0	0	1.56066	0	0	0	0	0	0	0	0	0	0	0	0	1.49302	0	0	0	0	0	0	0	0	1.29775	0	0	0	1.62886	0	0	0	0	0	0	0	3.18952	MICROARRAY: Bao_27137150, RNASEQ: Hirani_37876024
ADGRE1	0	0	0	0	0	0	1.69115	0	0	0	0	0	0	0	0	1.49339	0	0	0	0	0	0	0	0	0	0	0	0	0	0	0	0	0	0	0	0	3.18454	RNASEQ: Bhattacharya_25150061, MICROARRAY: Denervaud_26353077_up_ranked
GLIPR1	0	0	0	0	0	0	1.69115	0	0	0	0	0	0	0	0	1.49302	0	0	0	0	0	0	0	0	0	0	0	0	1.43301	0	0	0	0	0	0	0	3.18417	RNASEQ: Bhattacharya_25150061, MICROARRAY: Denervaud_26353077_up_ranked
LILRB4	0	0	0	0	0	0	1.69115	0	0	0	0	0	0	0	0	1.49302	0	0	0	0	0	0	0	0	0	0	0	0	1.43881	0	0	1.43856	0	0	0	0	3.18417	RNASEQ: Bhattacharya_25150061, MICROARRAY: Denervaud_26353077_up_ranked
GP2	0	0	0	0	0	0	1.69115	0	0	0	0	0	0	0	0	0	0	0	0	0	0	0	0	1.49201	0	0	0	0	0	0	0	0	0	0	0	0	3.18316	MICROARRAY: Denervaud_26353077_up_ranked, RNASEQ: Coarfa_28818871_male_up_day21
Ifitm6	0	0	0	0	0	0	1.69115	0	0	0	0	0	0	0	1.44269	0	0	0	0	0	0	0	0	0	0	0	0	0	0	0	0	1.49175	0	0	0	0	3.1829	MICROARRAY: Denervaud_26353077_up_ranked, RNASEQ: Rao_37310763_ranked
VTN	0	1.55983	0	0	0	0	0	0	0	0	0	0	0	0	1.4432	1.49302	0	0	0	0	0	0	0	0	0	0	0	0	1.62134	0	0	1.38703	0	0	0	0	3.18117	METHYLATION: Chen28689251, RNASEQ: Hirani_37876024
FPR1	0	0	0	0	0	0	1.69115	0	0	0	0	0	0	0	0	0	0	0	0	0	0	0	0	0	0	0	0	0	0	0	0	1.48835	0	0	0	0	3.1795	MICROARRAY: Denervaud_26353077_up_ranked, RNASEQ: Rao_37310763_ranked
ATP1B2	0	1.55983	0	0	0	0	0	0	0	0	0	0	0	0	0	1.49302	0	0	0	0	0	0	0	0	0	0	0	0	1.60948	0	0	0	0	0	0	0	3.16932	METHYLATION: Chen28689251, RNASEQ: Hirani_37876024
CDC42SE2	0	1.55983	0	0	0	0	0	0	0	1.60757	0	0	0	0	0	0	0	0	0	0	0	0	0	0	0	0	0	0	0	0	0	0	0	0	0	0	3.1674	METHYLATION: Chen28689251, MICROARRAY: Revhaug_31454811_down_ranked
SYNDIG1	0	0	0	0	0	0	0	0	0	0	0	0	0	0	0	0	0	0	1.77436	0	0	0	0	0	0	0	0	0	0	0	0	0	0	1.3915	1.38963	0	3.16586	SCRNASEQ: Hurskainen_33692365_epithelial, RNASEQ: Coarfa_28818871_female_down_day7_ranked
CD14	0	0	0	0	0	0	1.69115	0	0	0	0	0	0	0	0	0	0	0	0	0	0	0	0	0	0	0	0	0	1.43479	0	0	1.46934	0	0	0	0	3.16048	MICROARRAY: Denervaud_26353077_up_ranked, RNASEQ: Rao_37310763_ranked
OLFM4	0	0	0	0	0	0	1.69115	0	0	0	0	0	0	0	0	0	0	0	0	0	0	0	0	0	0	0	0	0	0	0	1.37591	1.4634	0	0	0	0	3.15455	RNASEQ: Rao_37310763_ranked, MICROARRAY: Denervaud_26353077_up_ranked
CLEC4D	0	0	0	0	0	0	1.69115	0	0	0	0	0	0	0	0	0	0	0	0	0	0	0	0	0	0	0	0	0	0	0	0	1.46263	0	0	0	0	3.15378	MICROARRAY: Denervaud_26353077_up_ranked, RNASEQ: Rao_37310763_ranked
ACTG1	0	1.55983	0	0	0	0	0	0	0	0	0	0	0	0	0	0	0	0	0	0	0	0	0	0	0	0	0	0	0	0	0	0	0	0	0	1.59345	3.15329	METHYLATION: Chen28689251, SCRNASEQ: Scaffa_34417156_ranked
NRP2	0	0	0	0	0	0	0	0	0	0	0	0	1.73795	0	0	0	0	0	0	0	0	0	0	0	0	0	0	0	0	0	0	0	1.41406	1.41149	1.41326	0	3.15201	SCRNASEQ: Hurskainen_33692365_endothelial, MICROARRAY: Shrestha_33446917_up
ACTC1	0	0	0	0	0	0	0	0	0	0	0	0	0	1.75472	1.44274	0	0	0	0	0	0	0	0	0	0	0	0	0	0	0	0	0	1.39712	1.39486	1.39357	0	3.15184	SCRNASEQ: Hurskainen_33692365_endothelial, RNASEQ: Al_mudares_37368978_female
FCGR2B	0	0	0	0	0	0	1.69115	0	0	0	0	0	1.73795	0	0	0	0	0	0	0	0	0	0	0	0	0	0	0	0	0	0	0	1.40756	1.40499	1.40561	0	3.14551	SCRNASEQ: Hurskainen_33692365_endothelial, MICROARRAY: Shrestha_33446917_up
DGKA	0	0	0	0	0	0	0	0	0	0	0	1.62017	0	0	0	0	0	0	0	0	0	0	0	0	0	0	0	0	1.43269	1.52158	0	0	0	0	0	0	3.14175	MICROARRAY: Shrestha_33446917_down_, RNASEQ: Nitkin_32753701_24hr_unranked
RETN	0	0	0	0	0	0	0	0	0	1.69639	0	0	0	1.4452	0	0	0	0	0	0	0	0	0	0	0	0	0	0	0	0	0	0	0	0	0	0	3.14159	MICROARRAY: Revhaug_31454811_down_ranked, RNASEQ: Al_mudares_37368978_female
C6	0	0	0	0	0	0	0	0	0	0	1.619	0	0	0	0	0	0	0	0	0	0	0	0	0	0	0	0	0	1.4306	1.52158	0	0	0	0	0	0	3.14058	RNASEQ: Nitkin_32753701_24hr_unranked, MICROARRAY: Revhaug_31454811_up_ranked
FCMR	0	0	0	0	0	0	1.69115	0	0	0	0	0	0	0	0	0	0	0	0	0	0	0	0	0	0	0	0	0	0	0	0	0	1.41058	1.40797	1.40921	1.44893	3.14008	SCRNASEQ: Scaffa_34417156_ranked, MICROARRAY: Denervaud_26353077_up_ranked
CD69	0	0	0	0	0	0	1.69115	0	0	0	0	0	0	0	0	0	0	0	0	0	0	0	0	0	0	0	0	0	0	0	0	0	0	0	0	1.44877	3.13991	SCRNASEQ: Scaffa_34417156_ranked, MICROARRAY: Denervaud_26353077_up_ranked
SEPTIN1	0	0	0	0	0	0	1.69115	0	0	0	0	0	0	0	0	0	0	0	0	0	0	0	0	0	0	0	0	0	0	0	0	0	0	0	0	1.44815	3.1393	SCRNASEQ: Scaffa_34417156_ranked, MICROARRAY: Denervaud_26353077_up_ranked
MZB1	0	0	0	0	0	0	1.69115	0	0	1.60757	0	0	0	0	0	0	0	0	0	0	0	0	0	0	0	0	0	0	0	0	0	0	0	0	0	1.448	3.13915	MICROARRAY: Denervaud_26353077_up_ranked, SCRNASEQ: Scaffa_34417156_ranked
NDUFB4	0	0	0	0	0	0	1.69115	0	0	0	0	0	0	0	0	0	0	0	0	0	0	0	0	0	0	0	0	0	0	0	0	0	0	0	0	1.44712	3.13827	SCRNASEQ: Scaffa_34417156_ranked, MICROARRAY: Denervaud_26353077_up_ranked
Gsta1	0	0	0	0	0	0	1.69115	0	0	0	0	0	0	0	0	0	0	0	0	0	0	0	0	0	0	0	0	0	0	0	0	0	0	0	0	1.44626	3.13741	SCRNASEQ: Scaffa_34417156_ranked, MICROARRAY: Denervaud_26353077_up_ranked
CD7	0	0	0	0	0	0	1.69115	0	0	0	0	0	0	0	0	0	0	0	0	0	0	0	0	0	0	0	0	0	0	0	0	0	0	0	0	1.44571	3.13685	SCRNASEQ: Scaffa_34417156_ranked, MICROARRAY: Denervaud_26353077_up_ranked
CYTIP	0	0	0	0	0	0	1.69115	0	0	0	0	0	0	0	0	0	0	0	0	0	0	0	0	0	0	0	0	0	0	0	0	0	1.40069	1.39827	1.39772	1.44566	3.13681	SCRNASEQ: Scaffa_34417156_ranked, MICROARRAY: Denervaud_26353077_up_ranked
PTPRCAP	0	0	0	0	0	0	1.69115	0	0	0	0	0	0	0	1.44472	0	0	0	0	0	0	0	0	0	0	0	0	0	0	0	0	0	0	0	0	0	3.13587	MICROARRAY: Denervaud_26353077_up_ranked, RNASEQ: Al_mudares_37368978_male
CD177	0	0	0	0	0	0	1.69115	0	0	0	0	0	0	0	0	0	0	0	0	0	0	0	0	0	0	0	0	0	1.44381	0	1.37591	1.36175	0	0	0	0	3.13496	RNASEQ: Hirani_37876024, MICROARRAY: Denervaud_26353077_up_ranked
CORO1A	0	0	0	0	0	0	1.69115	0	0	0	0	0	0	0	1.44319	0	0	0	0	0	0	0	0	0	0	0	0	0	0	0	0	0	0	0	0	0	3.13434	MICROARRAY: Denervaud_26353077_up_ranked, RNASEQ: Al_mudares_37368978_male
ZNF705A	0	0	0	0	0	0	1.69115	0	0	0	0	0	0	0	1.4431	0	0	0	0	0	0	0	0	0	0	0	0	0	0	0	0	1.36901	0	0	0	0	3.13424	MICROARRAY: Denervaud_26353077_up_ranked, RNASEQ: Al_mudares_37368978_male
CCL3L3	0	0	0	0	0	0	1.69115	0	0	0	0	0	0	0	0	0	0	0	0	0	0	0	0	0	0	0	0	0	0	0	0	1.42954	0	0	0	0	3.12068	MICROARRAY: Denervaud_26353077_up_ranked, RNASEQ: Rao_37310763_ranked
ZMAT4	0	1.55983	1.56066	0	0	0	0	0	0	0	0	0	0	0	0	0	0	0	0	0	0	0	0	0	0	0	0	0	0	0	0	0	0	0	0	0	3.12049	METHYLATION: Chen28689251, MICROARRAY: Bao_27137150
TAFA4	0	1.55983	1.56066	0	0	0	0	0	0	0	0	0	0	0	0	0	0	0	0	0	0	0	0	0	0	0	0	0	0	0	0	0	0	0	0	0	3.12049	METHYLATION: Chen28689251, MICROARRAY: Bao_27137150
IFITM1	0	0	0	0	0	0	1.69115	0	0	0	0	0	0	0	0	0	0	0	0	0	0	0	0	0	0	0	0	0	1.42594	0	1.37591	1.38202	0	0	0	0	3.11708	RNASEQ: Hirani_37876024, MICROARRAY: Denervaud_26353077_up_ranked
ENPP3	0	0	0	0	0	0	0	0	0	0	0	0	1.73795	0	0	0	0	0	0	0	0	0	0	0	0	0	0	0	0	0	0	1.37896	0	0	0	0	3.11691	MICROARRAY: Shrestha_33446917_up, RNASEQ: Rao_37310763_ranked
MS4A7	0	0	0	0	0	0	0	0	0	0	1.619	0	0	0	0	1.49302	0	0	0	0	0	0	0	0	0	0	0	0	0	0	0	0	0	0	0	0	3.11202	RNASEQ: Bhattacharya_25150061, MICROARRAY: Revhaug_31454811_up_ranked
TREM2	0	0	0	0	0	0	0	0	0	0	1.619	0	0	0	0	1.49302	0	0	0	0	0	0	0	0	0	0	0	0	1.4361	0	0	0	0	0	0	0	3.11202	RNASEQ: Bhattacharya_25150061, MICROARRAY: Revhaug_31454811_up_ranked
ALOX15	0	0	0	0	0	0	0	0	0	0	0	1.60238	0	0	0	0	0	0	0	0	0	0	0	0	0	1.50841	0	0	0	0	0	1.36177	0	0	0	0	3.11079	MICROARRAY: Shrestha_33446917_down_, RNASEQ: Dong_36157523
STAT4	0	0	0	0	0	0	1.69115	0	0	0	0	0	0	0	0	0	0	0	0	0	0	0	0	0	0	0	0	0	0	0	0	0	1.41496	1.41238	1.41431	0	3.10611	SCRNASEQ: Hurskainen_33692365_endothelial, MICROARRAY: Denervaud_26353077_up_ranked
RGS18	0	0	0	0	0	0	1.69115	0	0	0	0	0	0	0	0	0	0	0	0	0	0	0	0	0	0	0	0	0	0	0	0	0	1.40934	1.4067	1.40773	0	3.10048	SCRNASEQ: Hurskainen_33692365_endothelial, MICROARRAY: Denervaud_26353077_up_ranked
Stfa1	0	0	0	0	0	0	0	1.59486	0	0	0	0	0	0	0	0	0	0	0	0	0	0	0	0	0	0	0	0	0	0	1.37591	1.49934	0	0	0	0	3.0942	MICROARRAY: Natarajan_28851267_down, RNASEQ: Rao_37310763_ranked
ARHGAP15	0	0	0	0	0	0	1.69115	0	0	0	0	0	0	0	0	0	0	0	0	0	0	0	0	0	0	0	0	0	0	0	0	0	1.40106	1.39864	1.39815	0	3.09221	SCRNASEQ: Hurskainen_33692365_endothelial, MICROARRAY: Denervaud_26353077_up_ranked
MFAP2	0	0	0	0	0	0	0	0	0	0	0	0	0	0	0	1.49302	0	0	0	0	0	0	0	0	0	0	0	0	1.63939	0	0	0	0	0	0	1.44956	3.08895	RNASEQ: Hirani_37876024, SCRNASEQ: Scaffa_34417156_ranked
ATP8B4	0	0	0	0	0	0	1.69115	0	0	0	0	0	0	0	0	0	0	0	0	0	0	0	0	0	0	0	0	0	0	0	0	0	1.39559	1.39334	1.39179	0	3.08674	SCRNASEQ: Hurskainen_33692365_endothelial, MICROARRAY: Denervaud_26353077_up_ranked
ART3	0	0	0	0	0	0	0	0	0	1.60955	0	0	0	0	0	0	0	0	0	0	0	0	0	0	0	0	0	0	1.47569	0	0	0	0	0	0	0	3.08524	MICROARRAY: Revhaug_31454811_down_ranked, RNASEQ: Hirani_37876024
BPIFB1	0	0	0	0	0	0	1.69115	0	0	0	0	0	0	0	0	0	0	0	0	0	0	0	0	0	0	0	0	0	0	0	0	0	1.39295	1.3908	1.38874	0	3.08409	SCRNASEQ: Hurskainen_33692365_endothelial, MICROARRAY: Denervaud_26353077_up_ranked
CXCL10	0	0	1.56066	0	0	0	0	0	0	0	0	0	0	0	0	0	0	0	0	0	0	0	0	0	0	0	0	0	1.44752	1.52158	0	0	0	0	0	0	3.08224	MICROARRAY: Bao_27137150, RNASEQ: Nitkin_32753701_24hr_unranked
PTK2B	0	1.55983	0	0	0	0	0	0	0	0	0	0	0	0	0	0	0	0	0	0	0	0	0	0	0	0	0	0	0	1.52158	0	0	0	0	0	0	3.08141	METHYLATION: Chen28689251, RNASEQ: Nitkin_32753701_24hr_unranked
PHLDA3	0	0	0	0	0	0	0	0	0	0	0	0	0	0	0	1.49302	0	0	0	0	0	0	0	0	0	0	0	0	1.63015	0	0	0	1.40972	1.40708	1.40819	1.44598	3.07612	SCRNASEQ: Scaffa_34417156_ranked, RNASEQ: Hirani_37876024
TMPRSS2	0	1.55983	0	0	0	0	0	0	0	0	0	0	0	0	0	0	0	0	0	0	0	0	0	0	0	0	0	0	1.51513	0	0	0	0	0	0	0	3.07497	METHYLATION: Chen28689251, RNASEQ: Hirani_37876024
CRIP1	0	0	0	0	0	0	0	0	0	0	0	0	0	0	0	0	0	0	0	0	0	0	0	0	0	1.50841	0	0	0	0	0	0	0	0	0	1.5627	3.0711	SCRNASEQ: Scaffa_34417156_ranked, RNASEQ: Dong_36157523
CHST4	0	1.55983	0	0	0	0	0	0	0	0	0	0	0	0	0	0	0	0	0	0	0	0	0	0	0	1.50841	0	0	0	0	0	1.36837	0	0	0	0	3.06824	METHYLATION: Chen28689251, RNASEQ: Dong_36157523
STEAP4	0	1.55983	0	0	0	0	0	0	0	0	0	0	0	0	0	1.49302	0	0	0	0	0	0	0	0	0	1.50841	0	0	1.49785	0	0	1.47736	0	0	0	0	3.06824	METHYLATION: Chen28689251, RNASEQ: Dong_36157523
ADGRF5	0	1.55983	0	0	0	0	0	0	0	0	0	0	0	0	0	0	0	0	0	0	0	0	0	0	0	1.50841	0	0	0	0	0	0	0	0	0	0	3.06824	METHYLATION: Chen28689251, RNASEQ: Dong_36157523
PPFIBP1	0	1.55983	0	0	0	0	0	0	0	0	0	0	0	0	0	0	0	0	0	0	0	0	0	0	0	1.50841	0	0	0	0	0	0	0	0	0	0	3.06824	METHYLATION: Chen28689251, RNASEQ: Dong_36157523
FN1	0	0	0	0	0	0	0	0	0	0	1.619	0	0	0	0	0	0	0	0	0	0	0	0	0	0	0	0	0	0	0	0	0	1.4137	1.4111	1.41281	1.44859	3.06759	SCRNASEQ: Scaffa_34417156_ranked, MICROARRAY: Revhaug_31454811_up_ranked
PHF11	0	0	0	0	0	0	1.69115	0	0	0	0	0	0	0	0	0	0	0	0	0	0	0	0	0	0	0	0	0	0	0	1.37591	0	0	0	0	0	3.06706	RNASEQ: Nitkin_32753701_6hr_unranked, MICROARRAY: Denervaud_26353077_up_ranked
SLC16A7	0	1.55983	0	0	0	0	0	0	0	0	0	0	0	0	0	1.49302	0	0	0	0	0	0	0	0	0	0	0	0	1.50721	0	0	0	0	0	0	0	3.06704	METHYLATION: Chen28689251, RNASEQ: Hirani_37876024
SLIT2	0	0	0	0	0	0	0	0	0	0	1.619	0	0	0	0	0	0	0	0	0	0	0	0	0	0	0	0	0	0	0	0	0	0	0	0	1.44696	3.06596	SCRNASEQ: Scaffa_34417156_ranked, MICROARRAY: Revhaug_31454811_up_ranked
RPL15	0	1.55983	0	0	0	0	0	0	0	0	0	0	0	0	0	0	0	0	0	0	0	0	0	0	0	0	0	0	0	0	0	0	0	0	0	1.50491	3.06474	METHYLATION: Chen28689251, SCRNASEQ: Scaffa_34417156_ranked
NEO1	0	0	0	0	0	0	0	0	0	0	1.619	0	0	0	0	0	0	0	0	0	0	0	0	0	0	0	0	0	0	0	0	0	0	0	0	1.44428	3.06328	SCRNASEQ: Scaffa_34417156_ranked, MICROARRAY: Revhaug_31454811_up_ranked
VAMP5	0	0	0	0	0	0	1.69115	0	0	0	0	0	0	0	0	0	0	0	0	0	0	0	0	0	0	0	0	0	0	0	0	1.37046	0	0	0	0	3.0616	MICROARRAY: Denervaud_26353077_up_ranked, RNASEQ: Rao_37310763_ranked
SGCG	0	1.55983	0	0	0	0	0	0	0	0	0	0	0	0	0	1.49302	0	0	0	0	0	0	0	0	0	0	0	0	1.50094	0	0	0	0	0	0	0	3.06077	METHYLATION: Chen28689251, RNASEQ: Hirani_37876024
SLC14A1	0	0	0	0	0	0	1.69115	0	0	0	0	0	0	0	0	0	0	0	0	0	0	0	0	0	0	0	0	0	0	0	0	1.36842	0	0	0	0	3.05957	MICROARRAY: Denervaud_26353077_up_ranked, RNASEQ: Rao_37310763_ranked
CTSW	0	0	0	0	0	0	1.69115	0	0	0	0	0	0	0	0	0	0	0	0	0	0	0	0	0	0	0	0	0	0	0	0	1.36758	0	0	0	0	3.05872	MICROARRAY: Denervaud_26353077_up_ranked, RNASEQ: Rao_37310763_ranked
CXCL2	0	0	1.56066	0	0	0	0	0	0	0	0	0	0	0	0	0	0	0	0	0	0	0	0	0	0	0	0	0	1.43246	0	0	1.49676	0	0	0	0	3.05742	MICROARRAY: Bao_27137150, RNASEQ: Rao_37310763_ranked
SATB1	0	0	0	0	0	0	0	0	0	0	0	1.62466	0	0	0	0	0	0	0	0	0	0	0	0	0	0	0	0	1.4324	0	0	0	0	0	0	0	3.05706	MICROARRAY: Shrestha_33446917_down_, RNASEQ: Hirani_37876024
GPR65	0	0	0	0	0	0	1.69115	0	0	0	0	0	0	0	0	0	0	0	0	0	0	0	0	0	0	0	0	0	0	0	0	1.36287	0	0	0	0	3.05402	MICROARRAY: Denervaud_26353077_up_ranked, RNASEQ: Rao_37310763_ranked
GZMA	0	0	0	0	0	0	1.69115	0	0	0	0	0	0	0	0	0	0	0	0	0	0	0	0	0	0	0	0	0	0	0	0	1.36246	0	0	0	0	3.05361	MICROARRAY: Denervaud_26353077_up_ranked, RNASEQ: Rao_37310763_ranked
KLRC1	0	0	0	0	0	0	1.69115	0	0	0	0	0	0	0	0	0	0	0	0	0	0	0	0	0	0	0	0	0	0	0	0	1.36203	0	0	0	0	3.05318	MICROARRAY: Denervaud_26353077_up_ranked, RNASEQ: Rao_37310763_ranked
CD96	0	0	0	0	0	0	1.69115	0	0	0	0	0	0	0	0	0	0	0	0	0	0	0	0	0	0	0	0	0	0	0	0	1.36178	0	0	0	0	3.05293	MICROARRAY: Denervaud_26353077_up_ranked, RNASEQ: Rao_37310763_ranked
APOBEC1	0	0	0	0	0	0	1.69115	0	0	0	0	0	0	0	0	0	0	0	0	0	0	0	0	0	0	0	0	0	0	0	0	1.36177	0	0	0	0	3.05292	MICROARRAY: Denervaud_26353077_up_ranked, RNASEQ: Rao_37310763_ranked
PRICKLE2	0	1.55983	0	0	0	0	0	0	0	0	0	0	0	0	0	1.49302	0	0	0	0	0	0	0	0	0	0	0	0	0	0	0	0	0	0	0	0	3.05285	METHYLATION: Chen28689251, RNASEQ: Bhattacharya_25150061
SCUBE1	0	1.55983	0	0	0	0	0	0	0	0	0	0	0	1.45048	0	1.49302	0	0	0	0	0	0	0	0	0	0	0	0	1.43803	0	0	0	0	0	0	0	3.05285	METHYLATION: Chen28689251, RNASEQ: Bhattacharya_25150061
SORBS2	0	1.55983	0	0	0	0	0	0	0	0	0	0	0	0	0	1.49302	0	0	0	0	0	0	0	0	0	0	0	0	1.43234	0	0	0	0	0	0	0	3.05285	METHYLATION: Chen28689251, RNASEQ: Bhattacharya_25150061
FANCC	0	1.55983	0	0	0	0	0	0	0	0	0	0	0	0	0	1.49302	0	0	0	0	0	0	0	0	0	0	0	0	1.43828	0	0	0	0	0	0	0	3.05285	METHYLATION: Chen28689251, RNASEQ: Bhattacharya_25150061
APC2	0	1.55983	0	0	0	0	0	0	0	0	0	0	0	0	0	1.49302	0	0	0	0	0	0	0	0	0	0	0	0	0	0	0	0	0	0	0	0	3.05285	METHYLATION: Chen28689251, RNASEQ: Bhattacharya_25150061
MNDA	0	1.55983	0	0	0	0	0	0	0	0	0	0	0	0	0	1.49302	0	0	0	0	0	0	0	0	0	0	0	0	1.43424	0	0	0	0	0	0	0	3.05285	METHYLATION: Chen28689251, RNASEQ: Bhattacharya_25150061
CXCR5	0	0	0	0	0	0	1.69115	0	0	1.60757	0	0	0	0	0	0	0	0	0	0	0	0	0	0	0	0	0	0	0	0	0	1.3617	0	0	0	0	3.05284	MICROARRAY: Denervaud_26353077_up_ranked, RNASEQ: Rao_37310763_ranked
FABP1	0	0	1.56066	0	0	0	0	0	0	0	0	0	0	0	0	0	0	0	1.49188	0	0	0	0	0	0	0	0	0	0	0	0	0	0	0	0	0	3.05254	MICROARRAY: Bao_27137150, RNASEQ: Coarfa_28818871_female_down_day7_ranked
ERN2	0	1.55983	0	0	0	0	0	0	0	0	0	0	0	0	0	0	0	0	0	0	0	0	0	1.49201	0	0	0	0	0	0	0	0	0	0	0	0	3.05185	METHYLATION: Chen28689251, RNASEQ: Coarfa_28818871_male_up_day21
PI16	0	0	0	0	0	0	0	0	0	1.60787	0	0	0	0	1.44334	0	0	0	0	0	0	0	0	0	0	0	0	0	0	0	0	1.36229	0	0	0	0	3.0512	MICROARRAY: Revhaug_31454811_down_ranked, RNASEQ: Al_mudares_37368978_male
CYFIP2	0	0	0	0	0	0	0	0	0	1.60757	0	0	0	0	1.44333	0	0	0	0	0	0	0	0	0	0	0	0	0	0	0	0	0	0	0	0	0	3.0509	MICROARRAY: Revhaug_31454811_down_ranked, RNASEQ: Al_mudares_37368978_male
BCL11A	0	0	0	0	0	0	0	0	0	1.60757	0	0	0	0	0	0	0	0	0	0	0	0	0	0	0	0	0	0	0	0	0	0	0	0	0	1.44077	3.04835	MICROARRAY: Revhaug_31454811_down_ranked, SCRNASEQ: Scaffa_34417156_ranked
ITIH1	0	0	0	0	0	0	0	0	0	0	1.619	0	0	0	0	0	0	0	0	0	0	0	0	0	0	0	0	0	1.42843	0	0	0	0	0	0	0	3.04742	MICROARRAY: Revhaug_31454811_up_ranked, RNASEQ: Hirani_37876024
Saa3	0	0	1.56066	0	0	0	0	0	0	0	0	0	0	0	0	0	0	0	0	0	0	0	0	0	0	0	0	0	1.45799	0	0	1.48645	0	0	0	0	3.04711	MICROARRAY: Bao_27137150, RNASEQ: Rao_37310763_ranked
SLC19A2	0	0	0	0	0	0	0	0	0	0	0	0	0	0	1.445	1.49302	0	0	0	0	0	0	0	0	0	0	0	0	1.63804	0	0	0	1.40813	1.40554	1.40627	0	3.04617	SCRNASEQ: Hurskainen_33692365_endothelial, RNASEQ: Hirani_37876024
SOX11	0	0	0	0	0	0	0	0	0	0	0	0	0	0	0	1.49302	0	0	0	0	0	0	0	0	0	0	0	0	1.60275	0	0	0	0	0	0	1.44312	3.04587	RNASEQ: Hirani_37876024, SCRNASEQ: Scaffa_34417156_ranked
ATP5IF1	0	0	0	0	0	0	0	0	0	0	0	0	0	0	0	0	0	0	0	0	0	0	0	0	0	0	0	0	0	1.52158	0	1.36171	0	0	0	1.52401	3.04559	SCRNASEQ: Scaffa_34417156_ranked, RNASEQ: Nitkin_32753701_24hr_unranked
STAB2	0	0	0	0	0	0	0	0	0	0	1.619	0	0	0	0	0	0	0	0	0	0	0	0	0	0	0	0	0	1.42649	0	0	0	0	0	0	0	3.04549	MICROARRAY: Revhaug_31454811_up_ranked, RNASEQ: Hirani_37876024
AGTR1	0	1.55983	0	0	0	0	0	0	0	0	0	0	0	0	0	0	0	0	0	0	0	0	0	0	0	0	0	0	1.48553	0	0	1.36195	0	0	0	0	3.04536	METHYLATION: Chen28689251, RNASEQ: Hirani_37876024
FREM1	0	0	0	0	0	0	0	1.59486	0	0	0	0	0	0	0	0	0	0	0	0	0	0	0	0	0	0	0	0	0	0	0	0	0	0	0	1.44708	3.04194	MICROARRAY: Natarajan_28851267_down, SCRNASEQ: Scaffa_34417156_ranked
SLC27A6	0	0	0	0	0	0	0	1.59486	0	0	0	0	0	0	0	0	0	0	0	0	0	0	0	0	0	0	0	0	0	0	0	0	0	0	0	1.44707	3.04193	MICROARRAY: Natarajan_28851267_down, SCRNASEQ: Scaffa_34417156_ranked
UBA52	0	0	0	0	0	0	0	0	0	0	0	0	0	0	0	0	0	0	0	0	0	0	0	0	0	1.50841	0	0	0	0	0	0	0	0	0	1.53344	3.04184	SCRNASEQ: Scaffa_34417156_ranked, RNASEQ: Dong_36157523
RBFOX1	0	0	0	0	0	0	0	0	0	0	0	0	0	0	0	0	0	0	0	0	0	0	0	0	0	0	0	0	1.59736	0	0	0	0	0	0	1.44126	3.03861	SCRNASEQ: Scaffa_34417156_ranked, RNASEQ: Hirani_37876024
CD24	0	0	0	0	0	0	0	0	0	1.60757	0	0	0	0	0	0	0	0	0	0	0	0	0	0	0	0	0	0	1.42645	0	0	0	0	0	0	0	3.03402	MICROARRAY: Revhaug_31454811_down_ranked, RNASEQ: Hirani_37876024
CXCR4	0	0	0	0	0	0	0	0	0	0	0	0	0	0	0	0	0	0	0	0	0	0	0	0	0	0	0	0	1.58514	1.52158	0	0	1.41069	1.40808	1.40932	1.44786	3.033	SCRNASEQ: Scaffa_34417156_ranked, RNASEQ: Hirani_37876024
SLC10A6	0	0	1.56066	0	0	0	0	0	0	0	0	0	0	0	0	0	0	0	0	0	0	0	0	0	0	0	0	0	0	0	0	1.47181	0	0	0	0	3.03247	MICROARRAY: Bao_27137150, RNASEQ: Rao_37310763_ranked
MUC20	0	0	0	0	0	0	0	0	0	1.60757	0	0	0	0	0	0	0	0	0	0	0	0	0	0	0	0	0	0	1.42426	0	0	0	0	0	0	0	3.03184	MICROARRAY: Revhaug_31454811_down_ranked, RNASEQ: Hirani_37876024
PTPRN	0	0	0	0	0	0	0	0	0	0	0	0	0	0	0	1.49302	0	0	0	0	0	0	0	0	0	0	0	0	1.61531	0	0	0	1.41308	1.41049	1.4121	0	3.02839	SCRNASEQ: Hurskainen_33692365_endothelial, RNASEQ: Hirani_37876024
TNFRSF19	0	0	0	0	0	0	0	0	0	0	0	0	0	0	0	0	0	0	0	0	0	0	0	0	0	0	0	0	1.58417	0	0	0	0	0	0	1.44345	3.02762	SCRNASEQ: Scaffa_34417156_ranked, RNASEQ: Hirani_37876024
EPHX1	0	0	0	0	0	0	0	0	0	0	0	0	0	0	0	1.49302	0	0	0	0	0	0	0	0	0	0	0	0	1.62012	0	0	1.36807	1.40635	1.40384	1.40419	0	3.02647	SCRNASEQ: Hurskainen_33692365_endothelial, RNASEQ: Hirani_37876024
SLAMF9	0	0	0	0	0	0	0	0	0	0	1.619	0	0	0	0	0	0	0	0	0	0	0	0	0	0	0	0	0	0	0	0	0	1.40695	1.4044	1.40492	0	3.02595	SCRNASEQ: Hurskainen_33692365_endothelial, MICROARRAY: Revhaug_31454811_up_ranked
BATF3	0	0	0	0	0	0	0	0	0	0	1.619	0	0	0	0	0	0	0	0	0	0	0	0	0	0	0	0	0	0	0	0	0	1.40572	1.40322	1.40347	0	3.02472	SCRNASEQ: Hurskainen_33692365_endothelial, MICROARRAY: Revhaug_31454811_up_ranked
FOXF2	0	0	0	0	0	0	0	0	0	0	0	0	0	0	0	0	0	0	0	0	0	0	0	0	0	0	0	0	1.58035	0	0	0	0	0	0	1.44339	3.02374	SCRNASEQ: Scaffa_34417156_ranked, RNASEQ: Hirani_37876024
CCND1	0	0	0	0	0	0	0	0	0	0	0	0	0	0	0	1.49302	0	0	0	0	0	0	0	0	0	0	0	0	1.57301	1.52158	0	0	0	0	0	1.44957	3.02258	RNASEQ: Hirani_37876024, SCRNASEQ: Scaffa_34417156_ranked
VMP1	0	1.55983	0	0	0	0	0	0	0	0	0	0	0	0	0	0	0	0	0	0	0	0	0	0	0	0	0	0	1.46217	0	0	0	0	0	0	0	3.022	METHYLATION: Chen28689251, RNASEQ: Hirani_37876024
CHRM3	0	1.55983	0	0	0	0	0	0	0	0	0	0	0	0	0	0	0	0	0	0	0	0	0	0	0	0	0	0	0	0	0	1.46112	0	0	0	0	3.02095	METHYLATION: Chen28689251, RNASEQ: Rao_37310763_ranked
LRR1	0	0	1.56066	0	0	0	0	0	0	0	0	0	0	0	0	0	0	0	0	0	0	1.46029	0	0	0	0	0	0	0	0	0	0	0	0	0	0	3.02095	MICROARRAY: Bao_27137150, RNASEQ: Coarfa_28818871_male_down_day21
PZP	0	0	1.56066	0	0	0	0	0	0	0	0	0	0	0	0	0	0	0	0	0	0	0	0	0	0	0	0	0	1.45954	0	0	0	0	0	0	0	3.0202	MICROARRAY: Bao_27137150, RNASEQ: Hirani_37876024
PRSS41	0	1.55983	0	0	0	0	0	0	0	0	0	0	0	0	0	0	0	0	0	0	0	1.46029	0	0	0	0	0	0	0	0	0	0	0	0	0	0	3.02012	METHYLATION: Chen28689251, RNASEQ: Coarfa_28818871_male_down_day21
HMGB2	0	0	0	0	0	0	0	0	0	0	0	0	0	0	0	0	0	0	0	0	0	0	0	0	0	0	0	0	0	1.52158	0	0	0	0	0	1.49595	3.01753	SCRNASEQ: Scaffa_34417156_ranked, RNASEQ: Nitkin_32753701_24hr_unranked
PRCP	0	0	0	0	0	0	0	0	0	0	0	0	0	0	0	1.49302	0	0	0	0	0	0	0	0	0	0	0	0	1.56691	0	0	1.37513	0	0	0	1.44969	3.0166	RNASEQ: Hirani_37876024, SCRNASEQ: Scaffa_34417156_ranked
RGCC	0	0	0	0	0	0	0	0	0	0	0	0	0	0	0	0	0	0	0	0	0	0	0	0	0	0	0	0	0	0	1.37591	1.40269	0	0	0	1.61189	3.01458	SCRNASEQ: Scaffa_34417156_ranked, RNASEQ: Rao_37310763_ranked
SULF2	0	0	0	0	0	0	0	0	0	0	0	0	0	0	0	1.49302	0	0	0	0	0	0	0	0	0	0	0	0	1.62257	0	0	0	1.39116	1.38899	0	0	3.01373	SCRNASEQ: Hurskainen_33692365_endothelial, RNASEQ: Hirani_37876024
PC	0	1.55983	0	0	0	0	0	0	0	0	0	0	0	0	0	0	0	0	0	0	0	0	0	0	0	0	0	0	1.45281	0	0	1.39008	0	0	0	0	3.01265	METHYLATION: Chen28689251, RNASEQ: Hirani_37876024
COX6B1	0	1.55983	0	0	0	0	0	0	0	0	0	0	0	0	0	0	0	0	0	0	0	0	0	0	0	0	0	0	0	0	0	0	0	0	0	1.45102	3.01086	METHYLATION: Chen28689251, SCRNASEQ: Scaffa_34417156_ranked
GIMAP4	0	0	0	0	0	0	0	0	0	0	0	1.64884	0	0	0	0	0	0	0	0	0	0	0	0	0	0	0	0	0	0	0	1.36172	0	0	0	0	3.01056	MICROARRAY: Shrestha_33446917_down_, RNASEQ: Rao_37310763_ranked
RALY	0	1.55983	0	0	0	0	0	0	0	0	0	0	0	0	0	0	0	0	0	0	0	0	0	0	0	0	0	0	0	0	0	0	1.3928	1.39066	1.38858	1.45054	3.01037	METHYLATION: Chen28689251, SCRNASEQ: Scaffa_34417156_ranked
UQCRHL	0	1.55983	0	0	0	0	0	0	0	0	0	0	0	0	0	0	0	0	0	0	0	0	0	0	0	0	0	0	0	0	0	0	0	0	0	1.45041	3.01024	METHYLATION: Chen28689251, SCRNASEQ: Scaffa_34417156_ranked
HMGCS2	0	1.55983	0	0	0	0	0	0	0	0	0	0	0	1.45028	0	0	0	0	0	0	0	0	0	0	0	0	0	0	0	0	0	0	0	0	0	0	3.01011	METHYLATION: Chen28689251, RNASEQ: Al_mudares_37368978_female
GNAS	0	1.55983	0	0	0	0	0	0	0	0	0	0	0	0	0	0	0	0	0	0	0	0	0	0	0	0	0	0	0	0	0	0	0	0	0	1.45021	3.01004	METHYLATION: Chen28689251, SCRNASEQ: Scaffa_34417156_ranked
RAP1A	0	1.55983	0	0	0	0	0	0	0	0	0	0	0	0	0	0	0	0	0	0	0	0	0	0	0	0	0	0	0	0	0	0	0	0	0	1.45003	3.00987	METHYLATION: Chen28689251, SCRNASEQ: Scaffa_34417156_ranked
ATP6V1A	0	1.55983	0	0	0	0	0	0	0	0	0	0	0	0	0	0	0	0	0	0	0	0	0	0	0	0	0	0	1.44991	0	0	0	0	0	0	0	3.00974	METHYLATION: Chen28689251, RNASEQ: Hirani_37876024
HOXA5	0	0	0	0	0	0	0	0	0	0	0	0	0	0	0	1.49302	0	0	0	0	0	0	0	0	0	0	0	0	1.5603	0	0	0	0	0	0	1.44847	3.00877	RNASEQ: Hirani_37876024, SCRNASEQ: Scaffa_34417156_ranked
CREB1	0	1.55983	0	0	0	0	0	0	0	0	0	0	0	0	0	0	0	0	0	0	0	0	0	0	0	0	0	0	0	0	0	0	1.41394	1.41137	1.41312	1.44849	3.00832	METHYLATION: Chen28689251, SCRNASEQ: Scaffa_34417156_ranked
DNAJB4	0	1.55983	0	0	0	0	0	0	0	0	0	0	0	0	0	0	0	0	0	0	0	0	0	0	0	0	0	0	0	0	0	0	0	0	0	1.44835	3.00819	METHYLATION: Chen28689251, SCRNASEQ: Scaffa_34417156_ranked
SERPINE2	0	1.55983	0	0	0	0	0	0	0	0	0	0	0	0	0	0	0	0	0	0	0	0	0	0	0	0	0	0	0	0	0	0	1.41278	1.4102	1.41177	1.44826	3.00809	METHYLATION: Chen28689251, SCRNASEQ: Scaffa_34417156_ranked
KIF1A	0	0	0	0	0	0	0	0	0	0	0	0	0	1.44808	0	1.49302	0	0	0	0	0	0	0	0	0	0	0	0	1.5963	0	0	0	1.41168	1.40904	1.41048	0	3.00798	SCRNASEQ: Hurskainen_33692365_endothelial, RNASEQ: Hirani_37876024
Hba1	0	1.55983	0	0	0	0	0	0	0	0	0	0	0	0	0	0	0	0	0	0	0	0	0	0	0	0	0	0	0	0	0	0	0	0	0	1.44799	3.00783	METHYLATION: Chen28689251, SCRNASEQ: Scaffa_34417156_ranked
LYN	0	1.55983	0	0	0	0	0	0	0	0	0	0	0	0	0	0	0	0	0	0	0	0	0	0	0	0	0	0	0	0	0	0	0	0	0	1.44796	3.0078	METHYLATION: Chen28689251, SCRNASEQ: Scaffa_34417156_ranked
DDX6	0	1.55983	0	0	0	0	0	0	0	0	0	0	0	0	0	0	0	0	0	0	0	0	0	0	0	0	0	0	0	0	0	0	0	0	0	1.44781	3.00764	METHYLATION: Chen28689251, SCRNASEQ: Scaffa_34417156_ranked
ATP2B1	0	1.55983	0	0	0	0	0	0	0	0	0	0	0	0	0	0	0	0	0	0	0	0	0	0	0	0	0	0	0	0	0	0	0	0	0	1.4478	3.00763	METHYLATION: Chen28689251, SCRNASEQ: Scaffa_34417156_ranked
CPT1A	0	1.55983	0	0	0	0	0	0	0	0	0	0	0	1.44778	1.4441	0	0	0	0	0	0	0	0	0	0	0	0	0	0	0	0	0	0	0	0	0	3.00762	METHYLATION: Chen28689251, RNASEQ: Al_mudares_37368978_female
LRP2	0	1.55983	0	0	0	0	0	0	0	0	0	0	0	0	0	0	0	0	0	0	0	0	0	0	0	0	0	0	0	0	0	0	1.40015	1.39778	1.39709	1.44739	3.00722	METHYLATION: Chen28689251, SCRNASEQ: Scaffa_34417156_ranked
ZBTB16	0	0	1.56066	0	0	0	0	0	0	0	0	0	0	0	1.44458	0	0	0	0	1.15029	0	0	0	0	0	0	0	0	0	0	1.37591	1.44651	0	0	0	0	3.00717	MICROARRAY: Bao_27137150, RNASEQ: Rao_37310763_ranked
MAGED1	0	1.55983	0	0	0	0	0	0	0	0	0	0	0	0	0	0	0	0	0	0	0	0	0	0	0	0	0	0	0	0	0	0	0	0	0	1.44701	3.00684	METHYLATION: Chen28689251, SCRNASEQ: Scaffa_34417156_ranked
PAFAH1B1	0	1.55983	0	0	0	0	0	0	0	0	0	0	0	0	0	0	0	0	0	0	0	0	0	0	0	0	0	0	0	0	0	0	0	0	0	1.44624	3.00608	METHYLATION: Chen28689251, SCRNASEQ: Scaffa_34417156_ranked
HBA1	0	0	0	0	0	0	0	0	0	0	0	0	0	0	0	0	0	0	0	0	0	0	0	0	0	0	0	0	0	0	0	1.36179	0	0	0	1.64411	3.0059	SCRNASEQ: Scaffa_34417156_ranked, RNASEQ: Rao_37310763_ranked
AGPAT4	0	1.55983	0	0	0	0	0	0	0	0	0	0	0	0	0	0	0	0	0	0	0	0	0	0	0	0	0	0	0	0	0	0	0	0	0	1.44604	3.00587	METHYLATION: Chen28689251, SCRNASEQ: Scaffa_34417156_ranked
NSD1	0	1.55983	0	0	0	0	0	0	0	0	0	0	0	0	0	0	0	0	0	0	0	0	0	0	0	0	0	0	0	0	0	0	0	0	0	1.446	3.00583	METHYLATION: Chen28689251, SCRNASEQ: Scaffa_34417156_ranked
CDH11	0	1.55983	0	0	0	0	0	0	0	0	0	0	0	0	0	0	0	0	0	0	0	0	0	0	0	0	0	0	0	0	0	0	0	0	0	1.44586	3.00569	METHYLATION: Chen28689251, SCRNASEQ: Scaffa_34417156_ranked
MECOM	0	1.55983	0	0	0	0	0	0	0	0	0	0	0	0	0	0	0	0	0	0	0	0	0	0	0	0	0	0	0	0	0	0	0	0	0	1.44574	3.00557	METHYLATION: Chen28689251, SCRNASEQ: Scaffa_34417156_ranked
KCNS3	0	1.55983	0	0	0	0	0	0	0	0	0	0	0	0	0	0	0	0	0	0	0	0	0	0	0	0	0	0	1.44557	0	0	0	0	0	0	0	3.0054	METHYLATION: Chen28689251, RNASEQ: Hirani_37876024
SERPINB10	0	0	0	0	0	0	0	0	0	0	0	1.6157	0	0	0	0	0	0	0	0	0	0	0	0	0	0	0	0	0	0	0	1.38965	0	0	0	0	3.00536	MICROARRAY: Shrestha_33446917_down_, RNASEQ: Rao_37310763_ranked
CDH2	0	1.55983	0	0	0	0	0	0	0	0	0	0	0	0	0	0	0	0	0	0	0	0	0	0	0	0	0	0	1.44526	0	0	0	0	0	0	0	3.0051	METHYLATION: Chen28689251, RNASEQ: Hirani_37876024
PCM1	0	1.55983	0	0	0	0	0	0	0	0	0	0	0	0	0	0	0	0	0	0	0	0	0	0	0	0	0	0	0	0	0	0	0	0	0	1.44502	3.00485	METHYLATION: Chen28689251, SCRNASEQ: Scaffa_34417156_ranked
SPATS2L	0	1.55983	0	0	0	0	0	0	0	0	0	0	0	0	0	0	0	0	0	0	0	0	0	0	0	0	0	0	0	0	0	0	1.41454	1.41196	1.41383	1.44485	3.00468	METHYLATION: Chen28689251, SCRNASEQ: Scaffa_34417156_ranked
MEF2D	0	1.55983	0	0	0	0	0	0	0	0	0	0	0	1.44485	0	0	0	0	0	0	0	0	0	0	0	0	0	0	0	0	0	0	0	0	0	0	3.00468	METHYLATION: Chen28689251, RNASEQ: Al_mudares_37368978_female
C5AR2	0	1.55983	0	0	0	0	0	0	0	0	0	0	0	0	1.44477	0	0	0	0	0	0	0	0	0	0	0	0	0	0	0	0	0	0	0	0	0	3.0046	METHYLATION: Chen28689251, RNASEQ: Al_mudares_37368978_male
HADHB	0	1.55983	0	0	0	0	0	0	0	0	0	0	0	0	1.44474	0	0	0	0	0	0	0	0	0	0	0	0	0	0	0	0	1.36279	0	0	0	0	3.00457	METHYLATION: Chen28689251, RNASEQ: Al_mudares_37368978_male
BAZ2B	0	1.55983	0	0	0	0	0	0	0	0	0	0	0	0	0	0	0	0	0	0	0	0	0	0	0	0	0	0	0	0	0	0	1.40058	1.39816	1.39759	1.44468	3.00451	METHYLATION: Chen28689251, SCRNASEQ: Scaffa_34417156_ranked
THOC2	0	1.55983	0	0	0	0	0	0	0	0	0	0	0	0	0	0	0	0	0	0	0	0	0	0	0	0	0	0	0	0	0	0	0	0	0	1.44443	3.00427	METHYLATION: Chen28689251, SCRNASEQ: Scaffa_34417156_ranked
ABHD17B	0	1.55983	0	0	0	0	0	0	0	0	0	0	0	0	1.44441	0	0	0	0	0	0	0	0	0	0	0	0	0	0	0	0	0	0	0	0	0	3.00424	METHYLATION: Chen28689251, RNASEQ: Al_mudares_37368978_male
NUTF2	0	1.55983	0	0	0	0	0	0	0	0	0	0	0	0	0	0	0	0	0	0	0	0	0	0	0	0	0	0	0	0	0	0	0	0	0	1.44435	3.00418	METHYLATION: Chen28689251, SCRNASEQ: Scaffa_34417156_ranked
FAT3	0	1.55983	0	0	0	0	0	0	0	0	0	0	0	0	0	0	0	0	0	0	0	0	0	0	0	0	0	0	0	0	0	0	0	0	0	1.44432	3.00415	METHYLATION: Chen28689251, SCRNASEQ: Scaffa_34417156_ranked
DEF8	0	1.55983	0	0	0	0	0	0	0	0	0	0	0	0	1.4441	0	0	0	0	0	0	0	0	0	0	0	0	0	0	0	0	1.36168	0	0	0	0	3.00393	METHYLATION: Chen28689251, RNASEQ: Al_mudares_37368978_male
FGD1	0	1.55983	0	0	0	0	0	0	0	0	0	0	0	1.44405	0	0	0	0	0	0	0	0	0	0	0	0	0	0	1.42153	0	0	0	0	0	0	0	3.00389	METHYLATION: Chen28689251, RNASEQ: Al_mudares_37368978_female
GPC4	0	1.55983	0	0	0	0	0	0	0	0	0	0	0	0	0	0	0	0	0	0	0	0	0	0	0	0	0	0	0	0	0	0	0	0	0	1.44402	3.00385	METHYLATION: Chen28689251, SCRNASEQ: Scaffa_34417156_ranked
C1QTNF7	0	0	0	0	0	0	0	0	0	0	0	0	0	0	0	1.49302	0	0	0	0	0	0	0	0	0	0	0	0	1.56356	0	0	1.36516	0	0	0	1.44027	3.00382	RNASEQ: Hirani_37876024, SCRNASEQ: Scaffa_34417156_ranked
TDG	0	1.55983	0	0	0	0	0	0	0	0	0	0	0	0	1.44392	0	0	0	0	0	0	0	0	0	0	0	0	0	0	0	0	0	0	0	0	0	3.00375	METHYLATION: Chen28689251, RNASEQ: Al_mudares_37368978_male
RCN1	0	1.55983	0	0	0	0	0	0	0	0	0	0	0	0	0	0	0	0	0	0	0	0	0	0	0	0	0	0	0	0	0	0	1.39758	1.39526	1.39411	1.44389	3.00372	METHYLATION: Chen28689251, SCRNASEQ: Scaffa_34417156_ranked
USP49	0	1.55983	0	0	0	0	0	0	0	0	0	0	0	0	1.44389	0	0	0	0	0	0	0	0	0	0	0	0	0	0	0	0	0	0	0	0	0	3.00372	METHYLATION: Chen28689251, RNASEQ: Al_mudares_37368978_male
ATXN1	0	1.55983	0	0	0	0	0	0	0	0	0	0	0	0	1.44385	0	0	0	0	0	0	0	0	0	0	0	0	0	0	0	0	0	0	0	0	0	3.00369	METHYLATION: Chen28689251, RNASEQ: Al_mudares_37368978_male
GNG12	0	1.55983	0	0	0	0	0	0	0	0	0	0	0	0	0	0	0	0	0	0	0	0	0	0	0	0	0	0	0	0	0	0	0	0	0	1.44382	3.00365	METHYLATION: Chen28689251, SCRNASEQ: Scaffa_34417156_ranked
FYN	0	1.55983	0	0	0	0	0	0	0	0	0	0	0	0	1.44367	0	0	0	0	0	0	0	0	0	0	0	0	0	0	0	0	1.43885	0	0	0	0	3.0035	METHYLATION: Chen28689251, RNASEQ: Al_mudares_37368978_male
ENTPD5	0	1.55983	0	0	0	0	0	0	0	0	0	0	0	0	0	0	0	0	0	0	0	0	0	0	0	0	0	0	1.44349	0	0	0	0	0	0	0	3.00332	METHYLATION: Chen28689251, RNASEQ: Hirani_37876024
TFPI	0	1.55983	0	0	0	0	0	0	0	0	0	0	0	0	0	0	0	0	0	0	0	0	0	0	0	0	0	0	0	0	0	0	1.39912	1.39678	1.39598	1.44345	3.00328	METHYLATION: Chen28689251, SCRNASEQ: Scaffa_34417156_ranked
SEMA6D	0	1.55983	0	0	0	0	0	0	0	0	0	0	0	0	0	0	0	0	0	0	0	0	0	0	0	0	0	0	0	0	0	0	1.39577	1.39352	1.39201	1.44344	3.00327	METHYLATION: Chen28689251, SCRNASEQ: Scaffa_34417156_ranked
ALPL	0	1.55983	0	0	0	0	0	0	0	0	0	0	0	0	0	0	0	0	0	0	0	0	0	0	0	0	0	0	1.44339	0	0	0	0	0	0	0	3.00322	METHYLATION: Chen28689251, RNASEQ: Hirani_37876024
EIF4E2	0	1.55983	0	0	0	0	0	0	0	0	0	0	0	0	0	0	0	0	0	0	0	0	0	0	0	0	0	0	0	0	0	0	1.41228	1.4097	1.41125	1.44336	3.00319	METHYLATION: Chen28689251, SCRNASEQ: Scaffa_34417156_ranked
TMEM175	0	1.55983	0	0	0	0	0	0	0	0	0	0	0	0	1.44327	0	0	0	0	0	0	0	0	0	0	0	0	0	0	0	0	0	0	0	0	0	3.0031	METHYLATION: Chen28689251, RNASEQ: Al_mudares_37368978_male
IDUA	0	0	0	0	1.52769	0	0	0	0	0	0	0	0	1.47539	0	0	0	0	0	0	0	0	0	0	0	0	0	0	0	0	0	0	0	0	0	0	3.00308	RNASEQ: Al_mudares_37368978_female, MICROARRAY: Chao27770432
ARHGEF7	0	1.55983	0	0	0	0	0	0	0	0	0	0	0	0	0	0	0	0	0	0	0	0	0	0	0	0	0	0	0	0	0	0	0	0	0	1.44319	3.00302	METHYLATION: Chen28689251, SCRNASEQ: Scaffa_34417156_ranked
LARP4B	0	1.55983	0	0	0	0	0	0	0	0	0	0	0	0	1.44307	0	0	0	0	0	0	0	0	0	0	0	0	0	1.43702	0	0	0	0	0	0	0	3.0029	METHYLATION: Chen28689251, RNASEQ: Al_mudares_37368978_male
GHR	0	1.55983	0	0	0	0	0	0	0	0	0	0	0	0	0	0	0	0	0	0	0	0	0	0	0	0	0	0	0	0	0	0	0	0	0	1.44301	3.00284	METHYLATION: Chen28689251, SCRNASEQ: Scaffa_34417156_ranked
IFT43	0	1.55983	0	0	0	0	0	0	0	0	0	0	0	0	0	0	0	0	0	0	0	0	0	0	0	0	0	0	0	0	0	0	0	0	0	1.44284	3.00267	METHYLATION: Chen28689251, SCRNASEQ: Scaffa_34417156_ranked
FAM83B	0	1.55983	0	0	0	0	0	0	0	0	0	0	0	0	1.44282	0	0	0	0	0	0	0	0	0	0	0	0	0	1.42173	0	0	0	0	0	0	0	3.00265	METHYLATION: Chen28689251, RNASEQ: Al_mudares_37368978_male
PPCS	0	1.55983	0	0	0	0	0	0	0	0	0	0	0	0	1.44261	0	0	0	0	0	0	0	0	0	0	0	0	0	0	0	0	0	0	0	0	0	3.00244	METHYLATION: Chen28689251, RNASEQ: Al_mudares_37368978_male
LPAR1	0	1.55983	0	0	0	0	0	0	0	0	0	0	0	0	1.4425	0	0	0	0	0	0	0	0	0	0	0	0	0	0	0	0	0	0	0	0	0	3.00233	METHYLATION: Chen28689251, RNASEQ: Al_mudares_37368978_male
BICD1	0	1.55983	0	0	0	0	0	0	0	0	0	0	0	0	0	0	0	0	0	0	0	0	0	0	0	0	0	0	1.4423	0	0	1.36184	0	0	0	0	3.00213	METHYLATION: Chen28689251, RNASEQ: Hirani_37876024
CANX	0	1.55983	0	0	0	0	0	0	0	0	0	0	0	0	0	0	0	0	0	0	0	0	0	0	0	0	0	0	0	0	0	0	0	0	0	1.4422	3.00203	METHYLATION: Chen28689251, SCRNASEQ: Scaffa_34417156_ranked
NCOA1	0	1.55983	0	0	0	0	0	0	0	0	0	0	0	0	0	0	0	0	0	0	0	0	0	0	0	0	0	0	0	0	0	0	0	0	0	1.44219	3.00202	METHYLATION: Chen28689251, SCRNASEQ: Scaffa_34417156_ranked
COL8A1	0	1.55983	0	0	0	0	0	0	0	0	0	0	0	0	0	0	0	0	0	0	0	0	0	0	0	0	0	0	1.44218	0	0	0	0	0	0	0	3.00201	METHYLATION: Chen28689251, RNASEQ: Hirani_37876024
BCL9L	0	1.55983	0	0	0	0	0	0	0	0	0	0	0	0	0	0	0	0	0	0	0	0	0	0	0	0	0	0	0	0	0	0	0	0	0	1.4421	3.00193	METHYLATION: Chen28689251, SCRNASEQ: Scaffa_34417156_ranked
CPQ	0	1.55983	0	0	0	0	0	0	0	0	0	0	0	0	0	0	0	0	0	0	0	0	0	0	0	0	0	0	0	0	0	0	0	0	0	1.44199	3.00182	METHYLATION: Chen28689251, SCRNASEQ: Scaffa_34417156_ranked
RERE	0	1.55983	0	0	0	0	0	0	0	0	0	0	0	0	0	0	0	0	0	0	0	0	0	0	0	0	0	0	0	0	0	0	0	0	0	1.44184	3.00167	METHYLATION: Chen28689251, SCRNASEQ: Scaffa_34417156_ranked
CGNL1	0	1.55983	0	0	0	0	0	0	0	0	0	0	0	0	0	0	0	0	0	0	0	0	0	0	0	0	0	0	0	0	0	0	0	0	0	1.44158	3.00141	METHYLATION: Chen28689251, SCRNASEQ: Scaffa_34417156_ranked
MPZ	0	0	0	0	0	0	0	0	0	0	0	0	0	1.59379	0	0	0	0	0	0	0	0	0	0	0	0	0	0	0	0	0	0	1.40749	1.40492	1.40554	0	3.00128	SCRNASEQ: Hurskainen_33692365_endothelial, RNASEQ: Al_mudares_37368978_female
RPS27L	0	0	0	0	0	0	0	0	0	0	0	0	0	0	0	1.49302	0	0	0	0	0	0	0	0	0	0	0	0	1.55103	0	0	0	0	0	0	1.4499	3.00093	RNASEQ: Hirani_37876024, SCRNASEQ: Scaffa_34417156_ranked
PHOSPHO1	0	1.55983	0	0	0	0	0	0	0	0	0	0	0	0	0	0	0	0	0	0	0	0	0	0	0	0	0	0	1.44054	0	0	1.36181	0	0	0	0	3.00037	METHYLATION: Chen28689251, RNASEQ: Hirani_37876024
PAFAH1B2	0	1.55983	0	0	0	0	0	0	0	0	0	0	0	0	0	0	0	0	0	0	0	0	0	0	0	0	0	0	0	0	0	0	0	0	0	1.4403	3.00013	METHYLATION: Chen28689251, SCRNASEQ: Scaffa_34417156_ranked
LRRFIP2	0	1.55983	0	0	0	0	0	0	0	0	0	0	0	0	0	0	0	0	0	0	0	0	0	0	0	0	0	0	0	0	0	0	0	0	0	1.44019	3.00003	METHYLATION: Chen28689251, SCRNASEQ: Scaffa_34417156_ranked
ST6GALNAC3	0	1.55983	0	0	0	0	0	0	0	0	0	0	0	0	0	0	0	0	0	0	0	0	0	0	0	0	0	0	1.44	0	0	0	0	0	0	0	2.99983	METHYLATION: Chen28689251, RNASEQ: Hirani_37876024
LOX	0	1.55983	0	0	0	0	0	0	0	0	0	0	0	0	0	0	0	0	0	0	0	0	0	0	0	0	0	0	0	0	0	0	0	0	0	1.43996	2.9998	METHYLATION: Chen28689251, SCRNASEQ: Scaffa_34417156_ranked
CEP83	0	1.55983	0	0	0	0	0	0	0	0	0	0	0	0	0	0	0	0	0	0	0	0	0	0	0	0	0	0	0	0	0	0	0	0	0	1.43994	2.99977	METHYLATION: Chen28689251, SCRNASEQ: Scaffa_34417156_ranked
DCAF8	0	1.55983	0	0	0	0	0	0	0	0	0	0	0	0	0	0	0	0	0	0	0	0	0	0	0	0	0	0	0	0	0	0	1.40706	1.4045	1.40503	1.43994	2.99977	METHYLATION: Chen28689251, SCRNASEQ: Scaffa_34417156_ranked
SPINK5	0	0	0	0	0	0	0	0	0	0	0	0	0	0	0	0	0	0	0	0	0	0	0	0	0	0	0	0	1.5503	1.52158	0	0	0	0	0	1.44909	2.99938	SCRNASEQ: Scaffa_34417156_ranked, RNASEQ: Hirani_37876024
GSR	0	1.55983	0	0	0	0	0	0	0	0	0	0	0	0	0	0	0	0	0	0	0	0	0	0	0	0	0	0	1.43887	0	0	0	0	0	0	0	2.9987	METHYLATION: Chen28689251, RNASEQ: Hirani_37876024
CNTN1	0	1.55983	0	0	0	0	0	0	0	0	0	0	0	0	0	0	0	0	0	0	0	0	0	0	0	0	0	0	1.43859	0	0	0	0	0	0	0	2.99842	METHYLATION: Chen28689251, RNASEQ: Hirani_37876024
LLGL1	0	1.55983	0	0	0	0	0	0	0	0	0	0	0	0	0	0	0	0	0	0	0	0	0	0	0	0	0	0	1.43857	0	0	0	0	0	0	0	2.9984	METHYLATION: Chen28689251, RNASEQ: Hirani_37876024
CD163L1	0	0	0	0	0	0	0	0	0	0	1.619	0	0	0	0	0	0	0	0	0	0	0	0	0	0	0	0	0	0	0	0	1.37909	0	0	0	0	2.99809	RNASEQ: Rao_37310763_ranked, MICROARRAY: Revhaug_31454811_up_ranked
P2RY14	0	0	0	0	0	0	0	0	0	0	0	0	0	0	0	1.49555	0	0	0	0	0	0	0	0	0	0	0	0	1.55328	0	0	1.36235	0	0	0	1.44403	2.99731	RNASEQ: Hirani_37876024, SCRNASEQ: Scaffa_34417156_ranked
MPZL2	0	1.55983	0	0	0	0	0	0	0	0	0	0	0	0	0	0	0	0	0	0	0	0	0	0	0	0	0	0	1.43681	0	0	0	0	0	0	0	2.99664	METHYLATION: Chen28689251, RNASEQ: Hirani_37876024
C4orf33	0	0	0	0	1.52769	0	0	0	0	0	0	0	0	0	0	0	0	0	0	0	0	0	0	0	0	0	0	0	0	0	0	1.46893	0	0	0	0	2.99662	RNASEQ: Rao_37310763_ranked, MICROARRAY: Chao27770432
MPP6	0	1.55983	0	0	0	0	0	0	0	0	0	0	0	0	0	0	0	0	0	0	0	0	0	0	0	0	0	0	1.43676	0	0	0	0	0	0	0	2.99659	METHYLATION: Chen28689251, RNASEQ: Hirani_37876024
DCX	0	1.55983	0	0	0	0	0	0	0	0	0	0	0	0	0	0	0	0	0	0	0	0	0	0	0	0	0	0	1.43646	0	0	0	0	0	0	0	2.99629	METHYLATION: Chen28689251, RNASEQ: Hirani_37876024
PKNOX2	0	1.55983	0	0	0	0	0	0	0	0	0	0	0	0	0	0	0	0	0	0	0	0	0	0	0	0	0	0	1.43636	0	0	0	0	0	0	0	2.99619	METHYLATION: Chen28689251, RNASEQ: Hirani_37876024
HMG20A	0	1.55983	0	0	0	0	0	0	0	0	0	0	0	0	0	0	0	0	0	0	0	0	0	0	0	0	0	0	1.4362	0	0	0	0	0	0	0	2.99603	METHYLATION: Chen28689251, RNASEQ: Hirani_37876024
TIMM8A	0	1.55983	0	0	0	0	0	0	0	0	0	0	0	0	0	0	0	0	0	0	0	0	0	0	0	0	0	0	1.4353	0	0	0	0	0	0	0	2.99513	METHYLATION: Chen28689251, RNASEQ: Hirani_37876024
FOSB	0	1.55983	0	0	0	0	0	0	0	0	0	0	0	0	0	0	0	0	0	0	0	0	0	0	0	0	0	0	1.43502	0	0	1.38581	0	0	0	0	2.99485	METHYLATION: Chen28689251, RNASEQ: Hirani_37876024
HSPA1A	0	1.55983	0	0	0	0	0	0	0	0	0	0	0	0	0	0	0	0	0	0	0	0	0	0	0	0	0	0	1.43497	0	0	0	0	0	0	0	2.99481	METHYLATION: Chen28689251, RNASEQ: Hirani_37876024
ZDHHC2	0	1.55983	0	0	0	0	0	0	0	0	0	0	0	0	0	0	0	0	0	0	0	0	0	0	0	0	0	0	1.43442	0	0	0	0	0	0	0	2.99425	METHYLATION: Chen28689251, RNASEQ: Hirani_37876024
DENND2B	0	1.55983	0	0	0	0	0	0	0	0	0	0	0	0	0	0	0	0	0	0	0	0	0	0	0	0	0	0	1.43441	0	0	0	0	0	0	0	2.99424	METHYLATION: Chen28689251, RNASEQ: Hirani_37876024
DNAJA1	0	0	0	0	0	0	0	0	0	0	0	0	0	1.5421	0	0	0	0	0	0	0	0	0	0	0	0	0	0	0	0	0	0	0	0	0	1.45191	2.99401	SCRNASEQ: Scaffa_34417156_ranked, RNASEQ: Al_mudares_37368978_female
Serpina3i	0	0	1.56066	0	0	0	0	0	0	0	0	0	0	0	0	0	0	0	0	0	0	0	0	0	0	0	0	0	1.43319	0	0	0	0	0	0	0	2.99385	MICROARRAY: Bao_27137150, RNASEQ: Hirani_37876024
NFIX	0	0	0	0	0	0	0	0	0	0	0	0	0	0	0	0	0	0	0	0	0	0	0	0	0	0	0	0	1.54956	0	0	0	0	0	0	1.44347	2.99303	SCRNASEQ: Scaffa_34417156_ranked, RNASEQ: Hirani_37876024
COX4I2	0	0	0	0	0	0	0	0	0	0	0	0	0	0	0	1.49302	0	0	0	0	0	0	0	0	0	0	0	0	1.59949	0	0	0	1.39321	1.39104	1.38905	0	2.9927	SCRNASEQ: Hurskainen_33692365_endothelial, RNASEQ: Hirani_37876024
C4orf19	0	1.55983	0	0	0	0	0	0	0	0	0	0	0	0	0	0	0	0	0	0	0	0	0	0	0	0	0	0	1.43287	0	0	1.36177	0	0	0	0	2.9927	METHYLATION: Chen28689251, RNASEQ: Hirani_37876024
CYP26B1	0	0	0	0	0	0	0	0	0	0	0	0	0	0	0	0	0	0	0	0	0	0	0	0	0	0	0	0	1.54183	0	0	1.48457	0	0	0	1.45018	2.99201	SCRNASEQ: Scaffa_34417156_ranked, RNASEQ: Hirani_37876024
GALNT11	0	1.55983	0	0	0	0	0	0	0	0	0	0	0	0	0	0	0	0	0	0	0	0	0	0	0	0	0	0	0	0	0	1.43162	0	0	0	0	2.99145	METHYLATION: Chen28689251, RNASEQ: Rao_37310763_ranked
CXCL17	0	0	1.56066	0	0	0	0	0	0	0	0	0	0	0	0	0	0	0	0	0	0	0	0	0	0	0	0	0	1.42973	0	0	0	0	0	0	0	2.99039	MICROARRAY: Bao_27137150, RNASEQ: Hirani_37876024
SOX6	0	1.55983	0	0	0	0	0	0	0	0	0	0	0	0	0	0	0	0	0	0	0	0	0	0	0	0	0	0	1.42988	0	0	0	0	0	0	0	2.98971	METHYLATION: Chen28689251, RNASEQ: Hirani_37876024
CA2	0	0	0	0	0	0	0	0	0	0	0	0	0	0	0	0	0	0	0	0	0	0	0	0	0	0	0	0	1.53916	0	0	0	0	0	0	1.45035	2.98951	SCRNASEQ: Scaffa_34417156_ranked, RNASEQ: Hirani_37876024
LARGE1	0	1.55983	0	0	0	0	0	0	0	0	0	0	0	0	0	0	0	0	0	0	0	0	0	0	0	0	0	0	1.42956	0	0	0	0	0	0	0	2.98939	METHYLATION: Chen28689251, RNASEQ: Hirani_37876024
TMEM200A	0	1.55983	0	0	0	0	0	0	0	0	0	0	0	0	0	0	0	0	0	0	0	0	0	0	0	0	0	0	1.42927	0	0	1.38693	0	0	0	0	2.9891	METHYLATION: Chen28689251, RNASEQ: Hirani_37876024
TOM1L2	0	1.55983	0	0	0	0	0	0	0	0	0	0	0	0	0	0	0	0	0	0	0	0	0	0	0	0	0	0	1.42913	0	0	0	0	0	0	0	2.98896	METHYLATION: Chen28689251, RNASEQ: Hirani_37876024
CYRIA	0	1.55983	0	0	0	0	0	0	0	0	0	0	0	0	0	0	0	0	0	0	0	0	0	0	0	0	0	0	1.4291	0	0	1.36272	0	0	0	0	2.98893	METHYLATION: Chen28689251, RNASEQ: Hirani_37876024
CNKSR2	0	1.55983	0	0	0	0	0	0	0	0	0	0	0	0	0	0	0	0	0	0	0	0	0	0	0	0	0	0	1.42888	0	0	0	0	0	0	0	2.98872	METHYLATION: Chen28689251, RNASEQ: Hirani_37876024
TNRC6B	0	1.55983	0	0	0	0	0	0	0	0	0	0	0	0	0	0	0	0	0	0	0	0	0	0	0	0	0	0	1.42881	0	0	0	0	0	0	0	2.98864	METHYLATION: Chen28689251, RNASEQ: Hirani_37876024
ANGPTL7	0	0	1.56066	0	0	0	0	0	0	0	0	0	0	0	0	0	0	0	0	0	0	0	0	0	0	0	0	0	0	0	0	1.42751	0	0	0	0	2.98817	MICROARRAY: Bao_27137150, RNASEQ: Rao_37310763_ranked
SRXN1	0	0	0	0	0	0	0	0	0	0	0	0	0	0	0	0	0	0	0	0	0	0	0	0	0	0	0	0	1.59421	0	0	0	1.39341	1.3912	1.38927	0	2.98761	SCRNASEQ: Hurskainen_33692365_endothelial, RNASEQ: Hirani_37876024
CLEC12B	0	1.55983	0	0	0	0	0	0	0	0	0	0	0	0	0	0	0	0	0	0	0	0	0	0	0	0	0	0	1.42742	0	0	0	0	0	0	0	2.98725	METHYLATION: Chen28689251, RNASEQ: Hirani_37876024
ACSL4	0	1.55983	0	0	0	0	0	0	0	0	0	0	0	0	0	0	0	0	0	0	0	0	0	0	0	0	0	0	1.42735	0	0	0	0	0	0	0	2.98718	METHYLATION: Chen28689251, RNASEQ: Hirani_37876024
BDH1	0	1.55983	0	0	0	0	0	0	0	0	0	0	0	0	0	0	0	0	0	0	0	0	0	0	0	0	0	0	1.42717	0	0	0	0	0	0	0	2.987	METHYLATION: Chen28689251, RNASEQ: Hirani_37876024
DAGLA	0	1.55983	0	0	0	0	0	0	0	0	0	0	0	0	0	0	0	0	0	0	0	0	0	0	0	0	0	0	1.42691	0	0	0	0	0	0	0	2.98674	METHYLATION: Chen28689251, RNASEQ: Hirani_37876024
FILIP1	0	1.55983	0	0	0	0	0	0	0	0	0	0	0	0	0	0	0	0	0	0	0	0	0	0	0	0	0	0	1.42681	0	0	1.36214	0	0	0	0	2.98664	METHYLATION: Chen28689251, RNASEQ: Hirani_37876024
LY6D	0	0	0	0	0	0	0	0	0	1.60758	0	0	0	0	0	0	0	0	0	0	0	0	0	0	0	0	0	0	0	0	0	1.37889	0	0	0	0	2.98647	MICROARRAY: Revhaug_31454811_down_ranked, RNASEQ: Rao_37310763_ranked
TMEFF1	0	0	0	0	0	0	0	0	0	0	0	0	0	0	0	1.49302	0	0	0	0	0	0	0	0	0	0	0	0	1.54388	0	0	0	0	0	0	1.44258	2.98646	RNASEQ: Hirani_37876024, SCRNASEQ: Scaffa_34417156_ranked
CDC42EP2	0	1.55983	0	0	0	0	0	0	0	0	0	0	0	0	0	0	0	0	0	0	0	0	0	0	0	0	0	0	1.42561	0	0	0	0	0	0	0	2.98544	METHYLATION: Chen28689251, RNASEQ: Hirani_37876024
OSBPL2	0	1.55983	0	0	0	0	0	0	0	0	0	0	0	0	0	0	0	0	0	0	0	0	0	0	0	0	0	0	1.42538	0	0	0	0	0	0	0	2.98521	METHYLATION: Chen28689251, RNASEQ: Hirani_37876024
PCBP3	0	1.55983	0	0	0	0	0	0	0	0	0	0	0	0	0	0	0	0	0	0	0	0	0	0	0	0	0	0	1.42525	0	0	0	0	0	0	0	2.98508	METHYLATION: Chen28689251, RNASEQ: Hirani_37876024
KLHL29	0	1.55983	0	0	0	0	0	0	0	0	0	0	0	0	0	0	0	0	0	0	0	0	0	0	0	0	0	0	1.42456	0	0	0	0	0	0	0	2.98439	METHYLATION: Chen28689251, RNASEQ: Hirani_37876024
AK1	0	0	0	0	0	0	0	0	0	0	0	0	0	0	0	1.49302	0	0	0	0	0	0	0	0	0	0	0	0	1.58224	0	0	0	1.40193	1.39951	1.39912	0	2.98417	SCRNASEQ: Hurskainen_33692365_endothelial, RNASEQ: Hirani_37876024
TNFRSF12A	0	0	0	0	0	0	0	0	0	0	0	0	0	0	0	0	0	0	0	0	0	0	0	0	0	0	0	0	1.54251	0	0	0	0	0	0	1.44068	2.98319	SCRNASEQ: Scaffa_34417156_ranked, RNASEQ: Hirani_37876024
HAVCR2	0	0	0	0	0	0	0	0	0	0	1.619	0	0	0	0	0	0	0	0	0	0	0	0	0	0	0	0	0	0	0	0	1.36342	0	0	0	0	2.98242	RNASEQ: Rao_37310763_ranked, MICROARRAY: Revhaug_31454811_up_ranked
CDH4	0	0	0	0	0	0	0	0	0	0	0	0	0	0	0	0	0	0	0	0	0	0	0	0	0	0	0	0	1.5385	0	0	0	0	0	0	1.44347	2.98198	SCRNASEQ: Scaffa_34417156_ranked, RNASEQ: Hirani_37876024
OTUD5	0	1.55983	0	0	0	0	0	0	0	0	0	0	0	0	0	0	0	0	0	0	0	0	0	0	0	0	0	0	1.42168	0	0	1.36347	0	0	0	0	2.98151	METHYLATION: Chen28689251, RNASEQ: Hirani_37876024
B3GNT2	0	1.55983	0	0	0	0	0	0	0	0	0	0	0	0	0	0	0	0	0	0	0	0	0	0	0	0	0	0	1.42123	0	0	0	0	0	0	0	2.98107	METHYLATION: Chen28689251, RNASEQ: Hirani_37876024
NPBWR1	0	0	1.56066	0	0	0	0	0	0	0	0	0	0	0	0	0	0	0	0	0	0	0	0	0	0	0	0	0	0	0	0	0	0	0	1.41654	0	2.9772	MICROARRAY: Bao_27137150, SCRNASEQ: Hurskainen_33692365_stroma
OSBPL8	0	1.55983	0	0	0	0	0	0	0	0	0	0	0	0	0	0	0	0	0	0	0	0	0	0	0	0	0	0	0	0	0	1.41699	0	0	0	0	2.97683	METHYLATION: Chen28689251, RNASEQ: Rao_37310763_ranked
PPP1R42	0	1.55983	0	0	0	0	0	0	0	0	0	0	0	0	0	0	0	0	0	0	0	0	0	0	0	0	0	0	0	0	0	0	1.41673	1.41409	1.41634	0	2.97656	METHYLATION: Chen28689251, SCRNASEQ: Hurskainen_33692365_endothelial
LACTB2	0	1.55983	0	0	0	0	0	0	0	0	0	0	0	0	0	0	0	0	0	0	0	0	0	0	0	0	0	0	0	0	0	0	1.41658	1.41396	1.41616	0	2.97641	METHYLATION: Chen28689251, SCRNASEQ: Hurskainen_33692365_endothelial
COL9A1	0	1.55983	0	0	0	0	0	0	0	0	0	0	0	0	0	0	0	0	0	0	0	0	0	0	0	0	0	0	0	0	0	0	0	1.41354	1.41567	0	2.9755	METHYLATION: Chen28689251, SCRNASEQ: Hurskainen_33692365_stroma
CFH	0	0	0	0	1.52769	0	0	0	0	0	0	0	0	0	0	0	0	0	0	0	0	0	0	0	0	0	0	0	0	0	0	0	1.40947	1.4068	1.40787	1.44771	2.9754	SCRNASEQ: Scaffa_34417156_ranked, MICROARRAY: Chao27770432
CIRBP	0	0	0	0	1.52769	0	0	0	0	0	0	0	0	1.44768	1.44424	0	0	0	0	0	0	0	0	0	0	0	0	0	0	0	0	0	0	0	0	0	2.97537	RNASEQ: Al_mudares_37368978_female, MICROARRAY: Chao27770432
NPAS2	0	1.55983	0	0	0	0	0	0	0	0	0	0	0	0	0	0	0	0	0	0	0	0	0	0	0	0	0	0	0	0	0	0	1.41552	1.41291	1.41493	0	2.97535	METHYLATION: Chen28689251, SCRNASEQ: Hurskainen_33692365_endothelial
SEMA4C	0	0	0	0	0	0	0	0	0	0	0	0	0	1.45221	0	0	0	0	0	0	0	0	0	0	0	0	0	0	1.53403	0	0	0	1.41579	1.41319	1.41525	1.44038	2.97442	SCRNASEQ: Scaffa_34417156_ranked, RNASEQ: Hirani_37876024
CFLAR	0	1.55983	0	0	0	0	0	0	0	0	0	0	0	0	0	0	0	0	0	0	0	0	0	0	0	0	0	0	0	0	0	0	1.41437	1.41179	1.41363	0	2.9742	METHYLATION: Chen28689251, SCRNASEQ: Hurskainen_33692365_endothelial
CARF	0	1.55983	0	0	0	0	0	0	0	0	0	0	0	0	0	0	0	0	0	0	0	0	0	0	0	0	0	0	0	0	0	0	1.41418	1.4116	1.41339	0	2.97401	METHYLATION: Chen28689251, SCRNASEQ: Hurskainen_33692365_endothelial
KLF7	0	1.55983	0	0	0	0	0	0	0	0	0	0	0	0	0	0	0	0	0	0	0	0	0	0	0	0	0	0	0	0	0	0	1.41395	1.41138	1.41313	0	2.97378	METHYLATION: Chen28689251, SCRNASEQ: Hurskainen_33692365_endothelial
MAP2	0	1.55983	0	0	0	0	0	0	0	0	0	0	0	0	0	0	0	0	0	0	0	0	0	0	0	0	0	0	0	0	0	0	1.41385	1.41126	1.41299	0	2.97368	METHYLATION: Chen28689251, SCRNASEQ: Hurskainen_33692365_endothelial
RNF25	0	1.55983	0	0	0	0	0	0	0	0	0	0	0	0	0	0	0	0	0	0	0	0	0	0	0	0	0	0	0	0	0	0	1.41336	1.41075	1.41241	0	2.97319	METHYLATION: Chen28689251, SCRNASEQ: Hurskainen_33692365_endothelial
WNT11	0	0	0	0	0	0	0	0	0	0	0	0	0	0	0	0	0	0	0	0	0	0	0	0	0	0	0	0	1.52918	1.52158	0	0	0	0	0	1.44398	2.97316	SCRNASEQ: Scaffa_34417156_ranked, RNASEQ: Hirani_37876024
WDFY1	0	1.55983	0	0	0	0	0	0	0	0	0	0	0	0	0	0	0	0	0	0	0	0	0	0	0	0	0	0	0	0	0	0	1.41281	1.41022	1.4118	0	2.97264	METHYLATION: Chen28689251, SCRNASEQ: Hurskainen_33692365_endothelial
IRS1	0	1.55983	0	0	0	0	0	0	0	0	0	0	0	0	0	0	0	0	0	0	0	0	0	0	0	0	0	0	0	0	0	0	1.41273	1.41015	1.41171	0	2.97256	METHYLATION: Chen28689251, SCRNASEQ: Hurskainen_33692365_endothelial
COL4A4	0	1.55983	0	0	0	0	0	0	0	0	0	0	0	0	0	0	0	0	0	0	0	0	0	0	0	0	0	0	0	0	0	0	1.4127	1.41012	1.41168	0	2.97253	METHYLATION: Chen28689251, SCRNASEQ: Hurskainen_33692365_endothelial
TRIP12	0	1.55983	0	0	0	0	0	0	0	0	0	0	0	0	0	0	0	0	0	0	0	0	0	0	0	0	0	0	0	0	0	0	1.41256	1.40997	1.41155	0	2.97239	METHYLATION: Chen28689251, SCRNASEQ: Hurskainen_33692365_endothelial
CAB39	0	1.55983	0	0	0	0	0	0	0	0	0	0	0	0	0	0	0	0	0	0	0	0	0	0	0	0	0	0	0	0	0	0	1.41248	1.40989	1.41147	0	2.97231	METHYLATION: Chen28689251, SCRNASEQ: Hurskainen_33692365_endothelial
SPARCL1	0	0	0	0	0	0	0	0	0	0	0	0	0	0	0	0	0	0	0	0	0	0	0	0	0	0	0	0	1.52131	0	0	1.48136	0	0	0	1.45084	2.97215	SCRNASEQ: Scaffa_34417156_ranked, RNASEQ: Hirani_37876024
UBE2F	0	1.55983	0	0	0	0	0	0	0	0	0	0	0	0	0	0	0	0	0	0	0	0	0	0	0	0	0	0	0	0	0	0	1.41191	1.40929	1.41077	0	2.97175	METHYLATION: Chen28689251, SCRNASEQ: Hurskainen_33692365_endothelial
MTCH1	0	0	0	0	0	0	0	0	0	0	0	0	0	0	0	0	0	0	0	0	0	0	0	0	0	0	0	0	0	1.52158	0	0	0	0	0	1.45013	2.97171	SCRNASEQ: Scaffa_34417156_ranked, RNASEQ: Nitkin_32753701_24hr_unranked
PKM	0	0	0	0	0	0	0	0	0	0	0	0	0	0	0	0	0	0	0	0	0	0	0	0	0	0	0	0	0	1.52158	0	0	0	0	0	1.45011	2.97169	SCRNASEQ: Scaffa_34417156_ranked, RNASEQ: Nitkin_32753701_24hr_unranked
VPREB3	0	0	0	0	0	0	0	0	0	1.60757	0	0	0	0	0	0	0	0	0	0	0	0	0	0	0	0	0	0	0	0	0	1.36389	0	0	0	0	2.97147	MICROARRAY: Revhaug_31454811_down_ranked, RNASEQ: Rao_37310763_ranked
FAM171A1	0	0	0	0	0	0	0	0	0	0	0	0	0	0	0	0	0	0	0	0	0	0	0	0	0	0	0	0	1.52515	0	0	0	1.40531	1.40282	1.40302	1.44614	2.97129	SCRNASEQ: Scaffa_34417156_ranked, RNASEQ: Hirani_37876024
GPC3	0	0	0	0	0	0	0	0	0	0	0	0	0	0	0	0	0	0	0	0	0	0	0	0	0	1.50841	0	0	0	1.52158	0	0	0	0	0	1.4494	2.97098	SCRNASEQ: Scaffa_34417156_ranked, RNASEQ: Nitkin_32753701_24hr_unranked
PAK3	0	1.55983	0	0	0	0	0	0	0	0	0	0	0	0	0	0	0	0	0	0	0	0	0	0	0	0	0	0	0	0	0	1.41106	0	0	0	0	2.97089	METHYLATION: Chen28689251, RNASEQ: Rao_37310763_ranked
EGFL6	0	0	0	0	0	0	0	0	0	0	0	0	0	0	0	0	0	0	0	0	0	0	0	0	0	0	0	0	0	1.52158	0	0	0	0	0	1.44916	2.97074	SCRNASEQ: Scaffa_34417156_ranked, RNASEQ: Nitkin_32753701_24hr_unranked
NFE2L2	0	0	0	0	0	0	0	0	0	0	0	0	0	0	1.4436	0	0	0	0	0	0	0	0	0	0	0	0	0	0	1.52158	0	0	1.39955	1.39719	1.39644	1.44904	2.97062	SCRNASEQ: Scaffa_34417156_ranked, RNASEQ: Nitkin_32753701_24hr_unranked
R3HDM1	0	1.55983	0	0	0	0	0	0	0	0	0	0	0	0	0	0	0	0	0	0	0	0	0	0	0	0	0	0	0	0	0	0	1.41076	1.40814	1.4094	0	2.97059	METHYLATION: Chen28689251, SCRNASEQ: Hurskainen_33692365_endothelial
BTG1	0	0	0	0	0	0	0	0	0	0	0	0	0	0	0	0	0	0	0	0	0	0	0	0	0	0	0	0	0	1.52158	0	0	0	0	0	1.44901	2.97059	SCRNASEQ: Scaffa_34417156_ranked, RNASEQ: Nitkin_32753701_24hr_unranked
LGALS1	0	0	0	0	0	0	0	0	0	0	0	0	0	0	0	0	0	0	0	0	0	0	0	0	0	0	0	0	0	1.52158	0	1.36175	0	0	0	1.4489	2.97047	SCRNASEQ: Scaffa_34417156_ranked, RNASEQ: Nitkin_32753701_24hr_unranked
COL1A1	0	0	0	0	0	0	0	0	0	0	0	0	0	0	0	0	0	0	0	0	0	0	0	0	0	0	0	0	0	1.52158	0	0	0	0	0	1.44889	2.97047	SCRNASEQ: Scaffa_34417156_ranked, RNASEQ: Nitkin_32753701_24hr_unranked
COL1A2	0	0	0	0	0	0	0	0	0	0	0	0	0	0	0	0	0	0	0	0	0	0	0	0	0	0	0	0	0	1.52158	0	0	0	0	0	1.44875	2.97033	SCRNASEQ: Scaffa_34417156_ranked, RNASEQ: Nitkin_32753701_24hr_unranked
PTPRJ	0	0	0	0	0	0	0	0	0	0	0	0	0	0	0	0	0	0	0	0	0	0	0	0	0	0	0	0	0	1.52158	0	0	1.39869	1.39634	1.39539	1.44874	2.97032	SCRNASEQ: Scaffa_34417156_ranked, RNASEQ: Nitkin_32753701_24hr_unranked
PML	0	0	0	0	0	0	0	0	0	0	0	0	0	0	0	0	0	0	0	0	0	0	0	0	0	0	0	0	0	1.52158	0	0	0	0	0	1.44873	2.9703	SCRNASEQ: Scaffa_34417156_ranked, RNASEQ: Nitkin_32753701_24hr_unranked
SLC26A9	0	1.55983	0	0	0	0	0	0	0	0	0	0	0	0	0	0	0	0	0	0	0	0	0	0	0	0	0	0	0	0	0	0	1.41044	1.40784	1.40905	0	2.97027	METHYLATION: Chen28689251, SCRNASEQ: Hurskainen_33692365_endothelial
MDK	0	0	0	0	0	0	0	0	0	0	0	0	0	0	1.44439	0	0	0	0	0	0	0	0	0	0	0	0	0	1.44174	1.52158	0	0	1.39833	1.39598	1.39498	1.44863	2.9702	SCRNASEQ: Scaffa_34417156_ranked, RNASEQ: Nitkin_32753701_24hr_unranked
ACMSD	0	0	1.56066	0	0	0	0	0	0	0	0	0	0	0	0	0	0	0	0	0	0	0	0	0	0	0	0	0	0	0	0	0	0	1.4082	1.40947	0	2.97013	MICROARRAY: Bao_27137150, SCRNASEQ: Hurskainen_33692365_stroma
TNC	0	0	0	0	0	0	0	0	0	0	0	0	0	0	0	0	0	0	0	0	0	0	0	0	0	0	0	0	0	1.52158	0	0	0	0	0	1.44848	2.97006	SCRNASEQ: Scaffa_34417156_ranked, RNASEQ: Nitkin_32753701_24hr_unranked
EPAS1	0	0	0	0	0	0	0	0	0	0	0	0	0	0	0	1.49302	0	0	0	0	0	0	0	0	0	0	0	0	0	1.52158	0	0	0	0	0	1.44845	2.97003	RNASEQ: Nitkin_32753701_24hr_unranked, SCRNASEQ: Scaffa_34417156_ranked
FBLN5	0	0	0	0	0	0	0	0	0	0	0	0	0	0	0	0	0	0	0	0	0	0	0	0	0	0	0	0	0	1.52158	0	0	0	0	0	1.44834	2.96991	SCRNASEQ: Scaffa_34417156_ranked, RNASEQ: Nitkin_32753701_24hr_unranked
EMP3	0	0	0	0	0	0	0	0	0	0	0	0	0	0	0	0	0	0	0	0	0	0	0	0	0	0	0	0	0	1.52158	0	0	0	0	0	1.44812	2.9697	SCRNASEQ: Scaffa_34417156_ranked, RNASEQ: Nitkin_32753701_24hr_unranked
GPX1	0	0	0	0	0	0	0	0	0	0	0	0	0	0	0	0	0	0	0	0	0	0	0	0	0	0	0	0	0	1.52158	0	0	0	0	0	1.44807	2.96965	SCRNASEQ: Scaffa_34417156_ranked, RNASEQ: Nitkin_32753701_24hr_unranked
Oacyl	0	0	0	0	1.52769	0	0	0	0	0	0	0	0	0	0	0	0	0	0	0	0	0	0	0	0	0	0	0	1.44191	0	0	1.36328	0	0	0	0	2.9696	RNASEQ: Hirani_37876024, MICROARRAY: Chao27770432
LTB4R	0	0	0	0	0	0	0	0	0	0	0	0	0	0	0	0	0	0	0	0	0	0	0	0	0	0	0	0	0	1.52158	0	1.37757	0	0	0	1.44799	2.96957	SCRNASEQ: Scaffa_34417156_ranked, RNASEQ: Nitkin_32753701_24hr_unranked
MYZAP	0	0	0	0	0	0	0	0	0	0	0	0	0	0	0	0	0	0	0	0	0	0	0	0	0	0	0	0	1.51972	0	0	0	0	0	0	1.44975	2.96947	SCRNASEQ: Scaffa_34417156_ranked, RNASEQ: Hirani_37876024
FPR2	0	0	0	0	0	0	0	0	0	0	0	0	0	0	0	0	0	0	0	0	0	0	0	0	0	0	0	0	0	1.52158	0	1.47605	0	0	0	1.44789	2.96947	SCRNASEQ: Scaffa_34417156_ranked, RNASEQ: Nitkin_32753701_24hr_unranked
FMO1	0	0	0	0	0	0	0	0	0	0	0	0	0	0	0	1.49302	0	0	0	0	0	0	0	0	0	0	0	0	1.5611	0	0	0	1.40828	1.40568	1.40647	0	2.96939	SCRNASEQ: Hurskainen_33692365_endothelial, RNASEQ: Hirani_37876024
CD44	0	0	0	0	0	0	0	0	0	0	0	0	0	0	0	0	0	0	0	0	0	0	0	0	0	0	0	0	0	1.52158	0	0	1.39788	1.39555	1.39446	1.44779	2.96937	SCRNASEQ: Scaffa_34417156_ranked, RNASEQ: Nitkin_32753701_24hr_unranked
UCHL5	0	1.55983	0	0	0	0	0	0	0	0	0	0	0	0	0	0	0	0	0	0	0	0	0	0	0	0	0	0	0	0	0	0	1.40939	1.40673	1.40779	0	2.96922	METHYLATION: Chen28689251, SCRNASEQ: Hurskainen_33692365_endothelial
CTSB	0	0	0	0	0	0	0	0	0	0	0	0	0	0	0	1.49302	0	0	0	0	0	0	0	0	0	0	0	0	1.42333	1.52158	0	0	0	0	0	1.44756	2.96914	RNASEQ: Nitkin_32753701_24hr_unranked, SCRNASEQ: Scaffa_34417156_ranked
LRG1	0	0	0	0	0	0	0	0	0	0	0	0	0	0	0	0	0	0	0	0	0	0	0	0	0	0	0	0	1.43197	1.52158	1.37591	0	0	0	0	1.44725	2.96883	SCRNASEQ: Scaffa_34417156_ranked, RNASEQ: Nitkin_32753701_24hr_unranked
GSN	0	0	0	0	0	0	0	0	0	0	0	0	0	0	0	0	0	0	0	0	0	0	0	0	0	0	0	0	0	1.52158	0	0	1.40148	1.39906	1.39862	1.4472	2.96878	SCRNASEQ: Scaffa_34417156_ranked, RNASEQ: Nitkin_32753701_24hr_unranked
SMO	0	0	0	0	1.52769	0	0	0	0	0	0	0	0	0	0	0	0	0	0	0	0	0	0	0	0	0	0	0	0	0	0	0	0	0	0	1.44104	2.96873	SCRNASEQ: Scaffa_34417156_ranked, MICROARRAY: Chao27770432
NFASC	0	1.55983	0	0	0	0	0	0	0	0	0	0	0	0	0	0	0	0	0	0	0	0	0	0	0	0	0	0	0	0	0	0	0	1.40764	1.40882	0	2.96865	METHYLATION: Chen28689251, SCRNASEQ: Hurskainen_33692365_stroma
RASAL2	0	1.55983	0	0	0	0	0	0	0	0	0	0	0	0	0	0	0	0	0	0	0	0	0	0	0	0	0	0	0	0	0	0	1.40864	1.40607	1.40693	0	2.96847	METHYLATION: Chen28689251, SCRNASEQ: Hurskainen_33692365_endothelial
SEC16B	0	1.55983	0	0	0	0	0	0	0	0	0	0	0	0	0	0	0	0	0	0	0	0	0	0	0	0	0	0	0	0	0	0	1.40863	1.40606	1.40692	0	2.96846	METHYLATION: Chen28689251, SCRNASEQ: Hurskainen_33692365_endothelial
WNT2	0	0	0	0	0	0	0	0	0	0	0	0	0	0	0	0	0	0	0	0	0	0	0	0	0	0	0	0	0	1.52158	0	0	0	0	0	1.44675	2.96833	SCRNASEQ: Scaffa_34417156_ranked, RNASEQ: Nitkin_32753701_24hr_unranked
EFEMP2	0	0	0	0	0	0	0	0	0	0	0	0	0	0	0	0	0	0	0	0	0	0	0	0	0	0	0	0	0	1.52158	0	0	0	0	0	1.44645	2.96803	SCRNASEQ: Scaffa_34417156_ranked, RNASEQ: Nitkin_32753701_24hr_unranked
ENPEP	0	0	0	0	0	0	0	0	0	0	0	0	0	0	0	1.49302	0	0	0	0	0	0	0	0	0	0	0	0	1.44239	1.52158	0	0	0	0	0	1.44595	2.96753	RNASEQ: Nitkin_32753701_24hr_unranked, SCRNASEQ: Scaffa_34417156_ranked
UAP1	0	1.55983	0	0	0	0	0	0	0	0	0	0	0	0	0	0	0	0	0	0	0	0	0	0	0	0	0	0	0	0	0	0	1.40768	1.40512	1.40576	0	2.96751	METHYLATION: Chen28689251, SCRNASEQ: Hurskainen_33692365_endothelial
CRYAB	0	0	0	0	0	0	0	0	0	0	0	0	0	0	0	0	0	0	0	0	0	0	0	0	0	0	0	0	0	1.52158	0	0	0	0	0	1.44589	2.96747	SCRNASEQ: Scaffa_34417156_ranked, RNASEQ: Nitkin_32753701_24hr_unranked
PLAUR	0	0	0	0	0	0	0	0	0	0	0	0	0	0	0	1.49302	0	0	0	0	0	0	0	0	0	0	0	0	1.44477	1.52158	0	1.39255	0	0	0	1.44568	2.96726	RNASEQ: Nitkin_32753701_24hr_unranked, SCRNASEQ: Scaffa_34417156_ranked
PRKCD	0	0	0	0	0	0	0	0	0	0	0	0	0	0	0	0	0	0	0	0	0	0	0	0	0	0	0	0	0	1.52158	0	0	0	0	0	1.44568	2.96726	SCRNASEQ: Scaffa_34417156_ranked, RNASEQ: Nitkin_32753701_24hr_unranked
GLRX	0	0	0	0	0	0	0	0	0	0	0	0	0	0	1.44343	0	0	0	0	0	0	0	0	0	0	0	0	0	0	1.52158	0	1.3644	0	0	0	1.44557	2.96714	SCRNASEQ: Scaffa_34417156_ranked, RNASEQ: Nitkin_32753701_24hr_unranked
ANXA1	0	0	0	0	0	0	0	0	0	0	0	0	0	0	0	0	0	0	0	0	0	0	0	0	0	0	0	0	1.42449	1.52158	0	1.36181	0	0	0	1.44555	2.96713	SCRNASEQ: Scaffa_34417156_ranked, RNASEQ: Nitkin_32753701_24hr_unranked
CLU	0	0	0	0	0	0	0	0	0	0	0	0	0	0	0	0	0	0	0	0	0	0	0	0	0	1.50841	0	0	1.52293	0	0	0	0	0	0	1.44407	2.967	SCRNASEQ: Scaffa_34417156_ranked, RNASEQ: Hirani_37876024
TEAD2	0	0	0	0	0	0	0	0	0	0	0	0	0	0	0	0	0	0	0	0	0	0	0	0	0	0	0	0	1.52185	0	0	1.36702	0	0	0	1.44482	2.96666	SCRNASEQ: Scaffa_34417156_ranked, RNASEQ: Hirani_37876024
SNAI2	0	0	0	0	0	0	0	0	0	0	0	0	0	0	0	0	0	0	0	0	0	0	0	0	0	0	0	0	1.4517	1.52158	0	0	0	0	0	1.44493	2.96651	SCRNASEQ: Scaffa_34417156_ranked, RNASEQ: Nitkin_32753701_24hr_unranked
FNDC3B	0	0	0	0	0	0	0	0	0	0	0	0	0	0	0	0	1.52323	0	0	0	0	0	0	0	0	0	0	0	0	0	0	0	0	0	0	1.44322	2.96645	RNASEQ: Cheng_31961470, SCRNASEQ: Scaffa_34417156_ranked
AHCTF1	0	1.55983	0	0	0	0	0	0	0	0	0	0	0	0	0	0	0	0	0	0	0	0	0	0	0	0	0	0	0	0	0	0	1.40653	1.40402	1.40441	0	2.96637	METHYLATION: Chen28689251, SCRNASEQ: Hurskainen_33692365_endothelial
VEGFD	0	0	0	0	0	0	0	0	0	0	0	0	0	0	0	0	0	0	0	0	0	0	0	0	0	0	0	0	0	1.52158	0	0	0	0	0	1.44441	2.96599	SCRNASEQ: Scaffa_34417156_ranked, RNASEQ: Nitkin_32753701_24hr_unranked
NHLH1	0	0	1.56066	0	0	0	0	0	0	0	0	0	0	0	0	0	0	0	0	0	0	0	0	0	0	0	0	0	0	0	0	0	0	1.40456	1.40509	0	2.96575	MICROARRAY: Bao_27137150, SCRNASEQ: Hurskainen_33692365_stroma
ESRRG	0	1.55983	0	0	0	0	0	0	0	0	0	0	0	0	0	0	0	0	0	0	0	0	0	0	0	0	0	0	0	0	0	0	1.40588	0	1.40364	0	2.96571	METHYLATION: Chen28689251, SCRNASEQ: Hurskainen_33692365_endothelial
DCN	0	0	0	0	0	0	0	0	0	0	0	0	0	0	1.44275	0	0	0	0	0	0	0	0	0	0	0	0	0	0	1.52158	0	0	0	0	0	1.44411	2.96569	SCRNASEQ: Scaffa_34417156_ranked, RNASEQ: Nitkin_32753701_24hr_unranked
LOXL2	0	0	0	0	0	0	0	0	0	0	0	0	0	0	0	0	0	0	0	0	0	0	0	0	0	0	0	0	0	1.52158	0	0	0	0	0	1.44408	2.96566	SCRNASEQ: Scaffa_34417156_ranked, RNASEQ: Nitkin_32753701_24hr_unranked
MYH10	0	0	0	0	0	0	0	0	0	0	0	0	0	0	0	0	0	0	0	0	0	0	0	0	0	0	0	0	0	1.52158	0	0	0	0	0	1.44406	2.96564	SCRNASEQ: Scaffa_34417156_ranked, RNASEQ: Nitkin_32753701_24hr_unranked
ENPP2	0	0	0	0	0	0	0	0	0	0	0	0	0	0	0	0	0	0	0	0	0	0	0	0	0	0	0	0	1.46016	1.52158	0	0	0	0	0	1.444	2.96558	SCRNASEQ: Scaffa_34417156_ranked, RNASEQ: Nitkin_32753701_24hr_unranked
XDH	0	0	0	0	0	0	0	0	0	0	0	0	0	0	0	0	0	0	0	0	0	0	0	0	0	0	0	0	0	1.52158	0	1.39062	0	0	0	1.44399	2.96557	SCRNASEQ: Scaffa_34417156_ranked, RNASEQ: Nitkin_32753701_24hr_unranked
ROBO1	0	0	0	0	0	0	0	0	0	0	0	0	0	0	0	0	0	0	0	0	0	0	0	0	0	0	0	0	0	1.52158	0	0	0	0	0	1.44364	2.96522	SCRNASEQ: Scaffa_34417156_ranked, RNASEQ: Nitkin_32753701_24hr_unranked
FBLN1	0	0	0	0	0	0	0	0	0	0	0	0	0	0	0	0	0	0	0	0	0	0	0	0	0	0	0	0	0	1.52158	0	0	0	0	0	1.44348	2.96506	SCRNASEQ: Scaffa_34417156_ranked, RNASEQ: Nitkin_32753701_24hr_unranked
GJC1	0	0	0	0	0	0	0	0	0	0	0	0	0	0	0	0	0	0	0	0	0	0	0	0	0	0	0	0	0	1.52158	0	0	0	0	0	1.44337	2.96495	SCRNASEQ: Scaffa_34417156_ranked, RNASEQ: Nitkin_32753701_24hr_unranked
NTF3	0	1.55983	0	0	0	0	0	0	0	0	0	0	0	0	0	0	0	0	0	0	0	0	0	0	0	0	0	0	0	0	0	1.40509	0	0	0	0	2.96492	METHYLATION: Chen28689251, RNASEQ: Rao_37310763_ranked
USP6NL	0	1.55983	0	0	0	0	0	0	0	0	0	0	0	0	0	0	0	0	0	0	0	0	0	0	0	0	0	0	0	0	0	0	1.40498	1.40249	1.40261	0	2.96481	METHYLATION: Chen28689251, SCRNASEQ: Hurskainen_33692365_endothelial
FGF18	0	0	0	0	0	0	0	0	0	0	0	0	0	0	0	0	0	0	0	0	0	0	0	0	0	0	0	0	0	1.52158	0	1.36426	0	0	0	1.44304	2.96461	SCRNASEQ: Scaffa_34417156_ranked, RNASEQ: Nitkin_32753701_24hr_unranked
RGS7	0	1.55983	0	0	0	0	0	0	0	0	0	0	0	0	0	0	0	0	0	0	0	0	0	0	0	0	0	0	0	0	0	0	0	1.40428	1.40472	0	2.96455	METHYLATION: Chen28689251, SCRNASEQ: Hurskainen_33692365_stroma
FHL2	0	0	0	0	0	0	0	0	0	0	0	0	0	1.44938	0	0	0	0	0	0	0	0	0	0	0	0	0	0	0	1.52158	0	0	1.41524	1.41265	1.41461	1.44291	2.96449	SCRNASEQ: Scaffa_34417156_ranked, RNASEQ: Nitkin_32753701_24hr_unranked
COL4A2	0	0	0	0	0	0	0	0	0	0	0	0	0	0	0	0	0	0	0	0	0	0	0	0	0	1.50841	0	0	0	0	0	0	0	0	0	1.45485	2.96326	SCRNASEQ: Scaffa_34417156_ranked, RNASEQ: Dong_36157523
KCNQ5	0	0	0	0	0	0	0	0	0	0	0	0	0	0	0	1.49302	0	0	0	0	0	0	0	0	0	0	0	0	1.5474	0	0	0	0	1.41363	1.41578	0	2.96318	SCRNASEQ: Hurskainen_33692365_stroma, RNASEQ: Hirani_37876024
PTH1R	0	0	0	0	0	0	0	0	0	0	0	0	0	0	0	0	0	0	0	0	0	0	0	0	0	0	0	0	1.44824	1.52158	0	1.36537	0	0	0	1.44101	2.96259	SCRNASEQ: Scaffa_34417156_ranked, RNASEQ: Nitkin_32753701_24hr_unranked
USP20	0	1.55983	0	0	0	0	0	0	0	0	0	0	0	0	0	0	0	0	0	0	0	0	0	0	0	0	0	0	0	0	0	0	1.40235	1.39992	1.3996	0	2.96218	METHYLATION: Chen28689251, SCRNASEQ: Hurskainen_33692365_endothelial
ACER2	0	0	0	0	0	0	0	0	0	0	0	0	0	0	0	0	0	0	0	0	0	0	0	0	0	0	0	0	1.51367	0	0	1.42225	0	0	0	1.44851	2.96218	SCRNASEQ: Scaffa_34417156_ranked, RNASEQ: Hirani_37876024
ZFPM2	0	0	0	0	0	0	0	0	0	0	0	0	0	0	0	0	0	0	0	0	0	0	0	0	0	0	0	0	1.43826	1.52158	0	0	0	0	0	1.44038	2.96196	SCRNASEQ: Scaffa_34417156_ranked, RNASEQ: Nitkin_32753701_24hr_unranked
ACOXL	0	0	0	0	0	0	0	0	0	0	0	0	0	0	0	0	0	0	0	0	0	0	0	0	0	0	0	0	1.56606	0	0	1.36602	1.39524	1.39297	1.3914	0	2.9613	SCRNASEQ: Hurskainen_33692365_endothelial, RNASEQ: Hirani_37876024
GTDC1	0	1.55983	0	0	0	0	0	0	0	0	0	0	0	0	0	0	0	0	0	0	0	0	0	0	0	0	0	0	0	0	0	0	1.40105	1.39863	1.39814	0	2.96088	METHYLATION: Chen28689251, SCRNASEQ: Hurskainen_33692365_endothelial
TANK	0	1.55983	0	0	0	0	0	0	0	0	0	0	0	0	0	0	0	0	0	0	0	0	0	0	0	0	0	0	0	0	0	0	1.40048	1.39807	1.39749	0	2.96032	METHYLATION: Chen28689251, SCRNASEQ: Hurskainen_33692365_endothelial
PSMD14	0	1.55983	0	0	0	0	0	0	0	0	0	0	0	0	0	0	0	0	0	0	0	0	0	0	0	0	0	0	0	0	0	0	1.40047	1.39806	1.39747	0	2.9603	METHYLATION: Chen28689251, SCRNASEQ: Hurskainen_33692365_endothelial
XIRP2	0	1.55983	0	0	0	0	0	0	0	0	0	0	0	0	0	0	0	0	0	0	0	0	0	0	0	0	0	0	0	0	0	0	1.40026	0	1.39721	0	2.96009	METHYLATION: Chen28689251, SCRNASEQ: Hurskainen_33692365_endothelial
ATF2	0	1.55983	0	0	0	0	0	0	0	0	0	0	0	0	0	0	0	0	0	0	0	0	0	0	0	0	0	0	0	0	0	0	1.39964	1.39728	1.39653	0	2.95947	METHYLATION: Chen28689251, SCRNASEQ: Hurskainen_33692365_endothelial
PLEKHO1	0	0	0	0	0	0	0	0	0	0	0	0	0	0	0	0	0	0	0	0	0	0	0	0	0	0	0	0	1.51613	0	0	1.36188	0	0	0	1.44318	2.95931	SCRNASEQ: Scaffa_34417156_ranked, RNASEQ: Hirani_37876024
SESTD1	0	1.55983	0	0	0	0	0	0	0	0	0	0	0	0	0	0	0	0	0	0	0	0	0	0	0	0	0	0	0	0	0	0	1.39937	1.39701	1.39624	0	2.9592	METHYLATION: Chen28689251, SCRNASEQ: Hurskainen_33692365_endothelial
COL4A1	0	0	0	0	0	0	0	0	0	0	0	0	0	1.47217	1.44384	0	0	0	0	0	0	0	0	0	0	1.50841	0	0	0	0	0	0	0	0	0	1.45039	2.95879	SCRNASEQ: Scaffa_34417156_ranked, RNASEQ: Dong_36157523
PRDM11	0	1.55983	0	0	0	0	0	0	0	0	0	0	0	0	0	0	0	0	0	0	0	0	0	0	0	0	0	0	0	0	0	0	1.39817	1.39583	1.39481	0	2.958	METHYLATION: Chen28689251, SCRNASEQ: Hurskainen_33692365_endothelial
C11orf74	0	1.55983	0	0	0	0	0	0	0	0	0	0	0	0	0	0	0	0	0	0	0	0	0	0	0	0	0	0	0	0	0	0	1.39801	1.39568	1.3946	0	2.95784	METHYLATION: Chen28689251, SCRNASEQ: Hurskainen_33692365_endothelial
TRAF6	0	1.55983	0	0	0	0	0	0	0	0	0	0	0	0	0	0	0	0	0	0	0	0	0	0	0	0	0	0	0	0	0	0	1.39798	1.39565	1.39457	0	2.95782	METHYLATION: Chen28689251, SCRNASEQ: Hurskainen_33692365_endothelial
CD59	0	1.55983	0	0	0	0	0	0	0	0	0	0	0	0	0	0	0	0	0	0	0	0	0	0	0	0	0	0	0	0	0	0	1.39773	1.39541	1.3943	0	2.95757	METHYLATION: Chen28689251, SCRNASEQ: Hurskainen_33692365_endothelial
C11orf91	0	1.55983	0	0	0	0	0	0	0	0	0	0	0	0	0	0	0	0	0	0	0	0	0	0	0	0	0	0	0	0	0	0	1.39772	0	1.39428	0	2.95755	METHYLATION: Chen28689251, SCRNASEQ: Hurskainen_33692365_endothelial
QSER1	0	1.55983	0	0	0	0	0	0	0	0	0	0	0	0	0	0	0	0	0	0	0	0	0	0	0	0	0	0	0	0	0	0	1.39764	1.39532	1.39418	0	2.95747	METHYLATION: Chen28689251, SCRNASEQ: Hurskainen_33692365_endothelial
ELN	0	0	0	0	0	0	0	0	0	0	0	0	0	0	0	1.49302	0	0	0	0	0	0	0	0	0	1.50841	0	0	1.43778	0	0	0	0	0	0	1.44888	2.95729	RNASEQ: Dong_36157523, SCRNASEQ: Scaffa_34417156_ranked
BDNF	0	1.55983	0	0	0	0	0	0	0	0	0	0	0	0	0	0	0	0	0	0	0	0	0	0	0	0	0	0	0	0	0	0	1.39746	1.39514	1.39397	0	2.95729	METHYLATION: Chen28689251, SCRNASEQ: Hurskainen_33692365_endothelial
NUSAP1	0	0	1.56066	0	0	0	0	0	0	0	0	0	0	0	0	0	0	0	0	0	0	0	0	0	0	0	0	0	0	0	0	0	1.39654	1.3943	1.39292	0	2.9572	MICROARRAY: Bao_27137150, SCRNASEQ: Hurskainen_33692365_endothelial
SFTPA1	0	0	0	0	0	0	0	0	0	0	0	0	0	0	0	0	0	0	0	0	0	0	0	0	0	1.50841	0	0	0	0	0	0	0	0	0	1.44878	2.95719	SCRNASEQ: Scaffa_34417156_ranked, RNASEQ: Dong_36157523
PTPRB	0	0	0	0	0	0	0	0	0	0	0	0	0	0	0	1.49302	0	0	0	0	0	0	0	0	0	1.50841	0	0	1.43834	0	0	0	0	0	0	1.44828	2.95669	RNASEQ: Dong_36157523, SCRNASEQ: Scaffa_34417156_ranked
ITM2A	0	0	0	0	0	0	0	0	0	0	0	0	0	0	0	0	0	0	0	0	0	0	0	0	0	1.50841	0	0	0	0	0	0	0	0	0	1.44815	2.95656	SCRNASEQ: Scaffa_34417156_ranked, RNASEQ: Dong_36157523
Ccl6	0	0	0	0	0	0	0	0	0	0	0	0	0	0	0	0	0	0	0	0	0	0	0	0	0	1.50841	0	0	1.4463	0	0	0	0	0	0	1.44795	2.95636	SCRNASEQ: Scaffa_34417156_ranked, RNASEQ: Dong_36157523
RTF1	0	1.55983	0	0	0	0	0	0	0	0	0	0	0	0	0	0	0	0	0	0	0	0	0	0	0	0	0	0	0	0	0	0	1.39651	1.39427	1.39289	0	2.95634	METHYLATION: Chen28689251, SCRNASEQ: Hurskainen_33692365_endothelial
RPAP1	0	1.55983	0	0	0	0	0	0	0	0	0	0	0	0	0	0	0	0	0	0	0	0	0	0	0	0	0	0	0	0	0	0	1.39647	1.39424	1.39285	0	2.9563	METHYLATION: Chen28689251, SCRNASEQ: Hurskainen_33692365_endothelial
CTSD	0	0	0	0	0	0	0	0	0	0	0	0	0	0	0	1.49302	0	0	0	0	0	0	0	0	0	1.50841	0	0	0	0	0	0	0	0	0	1.44783	2.95624	RNASEQ: Dong_36157523, SCRNASEQ: Scaffa_34417156_ranked
SOX8	0	1.55983	0	0	0	0	0	0	0	0	0	0	0	0	0	0	0	0	0	0	0	0	1.39637	0	0	0	0	0	0	0	0	1.3674	0	0	0	0	2.9562	METHYLATION: Chen28689251, RNASEQ: Coarfa_28818871_male_down_day7
TTBK2	0	1.55983	0	0	0	0	0	0	0	0	0	0	0	0	0	0	0	0	0	0	0	0	0	0	0	0	0	0	0	0	0	0	1.39625	1.39402	1.39259	0	2.95608	METHYLATION: Chen28689251, SCRNASEQ: Hurskainen_33692365_endothelial
LCP1	0	0	0	0	0	0	0	0	0	0	0	0	0	0	0	0	0	0	0	0	0	0	0	0	0	1.50841	0	0	0	0	0	0	0	0	0	1.44759	2.95599	SCRNASEQ: Scaffa_34417156_ranked, RNASEQ: Dong_36157523
MACF1	0	0	0	0	0	0	0	0	0	0	0	0	0	0	0	0	0	0	0	0	0	0	0	0	0	1.50841	0	0	0	0	0	0	0	0	0	1.44752	2.95593	SCRNASEQ: Scaffa_34417156_ranked, RNASEQ: Dong_36157523
BUB1	0	0	1.56066	0	0	0	0	0	0	0	0	0	0	0	0	0	0	0	0	0	0	0	0	0	0	0	0	0	0	0	0	0	1.39525	1.39299	1.39142	0	2.95591	MICROARRAY: Bao_27137150, SCRNASEQ: Hurskainen_33692365_endothelial
SLC34A2	0	0	0	0	0	0	0	0	0	0	0	0	0	0	0	0	0	0	0	0	0	0	0	0	0	1.50841	0	0	0	0	0	0	0	0	0	1.44743	2.95584	SCRNASEQ: Scaffa_34417156_ranked, RNASEQ: Dong_36157523
SQOR	0	1.55983	0	0	0	0	0	0	0	0	0	0	0	0	0	0	0	0	0	0	0	0	0	0	0	0	0	0	0	0	0	0	1.39579	1.39354	1.39202	0	2.95562	METHYLATION: Chen28689251, SCRNASEQ: Hurskainen_33692365_endothelial
CCDC80	0	0	0	0	0	0	0	0	0	0	0	0	0	0	0	0	0	0	0	0	0	0	0	0	0	1.50841	0	0	0	0	0	0	0	0	0	1.44689	2.9553	SCRNASEQ: Scaffa_34417156_ranked, RNASEQ: Dong_36157523
IGFBP6	0	0	0	0	0	0	0	0	0	0	0	0	0	0	1.44346	0	0	0	0	0	0	0	0	0	0	1.50841	0	0	0	0	0	1.36879	0	0	0	1.44665	2.95506	SCRNASEQ: Scaffa_34417156_ranked, RNASEQ: Dong_36157523
ANAPC1	0	1.55983	0	0	0	0	0	0	0	0	0	0	0	0	0	0	0	0	0	0	0	0	0	0	0	0	0	0	0	0	0	0	1.39521	1.39295	1.39137	0	2.95504	METHYLATION: Chen28689251, SCRNASEQ: Hurskainen_33692365_endothelial
EFEMP1	0	0	0	0	0	0	0	0	0	0	0	0	0	0	0	0	0	0	0	0	0	0	0	0	0	1.50841	0	0	0	0	0	0	0	0	0	1.44647	2.95487	SCRNASEQ: Scaffa_34417156_ranked, RNASEQ: Dong_36157523
SRPX	0	0	0	0	0	0	0	0	0	0	0	0	0	0	0	1.51013	0	0	0	0	0	0	0	0	0	0	0	0	1.45544	0	0	1.36242	0	0	0	1.44473	2.95486	RNASEQ: Bhattacharya_25150061, SCRNASEQ: Scaffa_34417156_ranked
HOXB5	0	0	0	0	0	0	0	0	0	0	0	0	0	0	0	1.49302	0	0	0	0	0	0	0	0	0	0	0	0	1.51036	0	0	0	0	0	0	1.44384	2.95421	RNASEQ: Hirani_37876024, SCRNASEQ: Scaffa_34417156_ranked
PAK5	0	1.55983	0	0	0	0	0	0	0	0	0	0	0	0	0	0	0	0	0	0	0	0	0	0	0	0	0	0	0	0	0	0	1.39433	0	1.39039	0	2.95416	METHYLATION: Chen28689251, SCRNASEQ: Hurskainen_33692365_endothelial
MICOS10-NBL1	0	0	0	0	0	0	0	0	0	0	0	0	0	0	0	0	0	0	0	0	0	0	0	0	0	1.50841	0	0	0	0	0	0	0	0	0	1.4455	2.95391	SCRNASEQ: Scaffa_34417156_ranked, RNASEQ: Dong_36157523
PTGIS	0	0	0	0	0	0	0	0	0	0	0	0	0	0	0	0	0	0	0	0	0	0	0	0	0	1.50841	0	0	1.42438	0	0	0	1.39105	1.38889	0	1.44548	2.95388	SCRNASEQ: Scaffa_34417156_ranked, RNASEQ: Dong_36157523
NKAIN4	0	0	0	0	0	0	0	0	0	0	0	0	0	0	0	0	0	0	0	0	0	0	0	0	0	1.50841	0	0	0	0	0	0	0	0	0	1.44547	2.95388	SCRNASEQ: Scaffa_34417156_ranked, RNASEQ: Dong_36157523
ITGA8	0	0	0	0	0	0	0	0	0	0	0	0	0	0	0	0	0	0	0	0	0	0	0	0	0	1.50841	0	0	0	0	0	1.36257	1.40477	1.40229	1.40238	1.44529	2.95369	SCRNASEQ: Scaffa_34417156_ranked, RNASEQ: Dong_36157523
KITLG	0	0	0	0	0	0	0	0	0	0	0	0	0	0	0	0	0	0	0	0	0	0	0	0	0	1.50841	0	0	0	0	0	0	0	0	0	1.44515	2.95356	SCRNASEQ: Scaffa_34417156_ranked, RNASEQ: Dong_36157523
SOX17	0	0	0	0	0	0	0	0	0	0	0	0	0	0	0	1.49302	0	0	0	0	0	0	0	0	0	0	0	0	1.53656	0	0	0	1.41695	1.4143	1.41663	0	2.95351	SCRNASEQ: Hurskainen_33692365_endothelial, RNASEQ: Hirani_37876024
SLC12A1	0	1.55983	0	0	0	0	0	0	0	0	0	0	0	0	0	0	0	0	0	0	0	0	0	0	0	0	0	0	0	0	0	0	0	1.39348	1.39197	0	2.95332	METHYLATION: Chen28689251, SCRNASEQ: Hurskainen_33692365_epithelial
PDRG1	0	1.55983	0	0	0	0	0	0	0	0	0	0	0	0	0	0	0	0	0	0	0	0	0	0	0	0	0	0	0	0	0	0	1.39314	1.39097	1.38895	0	2.95298	METHYLATION: Chen28689251, SCRNASEQ: Hurskainen_33692365_endothelial
KIF3B	0	1.55983	0	0	0	0	0	0	0	0	0	0	0	0	0	0	0	0	0	0	0	0	0	0	0	0	0	0	0	0	0	0	1.39305	1.39089	1.38885	0	2.95288	METHYLATION: Chen28689251, SCRNASEQ: Hurskainen_33692365_endothelial
CAVIN3	0	0	0	0	0	0	0	0	0	0	0	0	0	0	0	0	0	0	0	0	0	0	0	0	0	1.50841	0	0	0	0	0	0	0	0	0	1.44415	2.95256	SCRNASEQ: Scaffa_34417156_ranked, RNASEQ: Dong_36157523
GLA	0	0	0	0	1.52769	0	0	0	0	0	0	0	0	0	0	0	0	0	0	0	0	0	0	0	0	0	0	0	1.42465	0	1.37591	0	0	0	0	0	2.95234	RNASEQ: Hirani_37876024, MICROARRAY: Chao27770432
IGFBP5	0	0	0	0	0	0	0	0	0	0	0	0	0	0	0	0	0	0	0	0	0	0	0	0	0	1.50841	0	0	0	0	0	0	1.4136	1.41099	1.41268	1.44377	2.95217	SCRNASEQ: Scaffa_34417156_ranked, RNASEQ: Dong_36157523
ZNF384	0	1.55983	0	0	0	0	0	0	0	0	0	0	0	0	0	0	0	0	0	0	0	0	0	0	0	0	0	0	0	0	0	1.3922	0	0	0	0	2.95203	METHYLATION: Chen28689251, RNASEQ: Rao_37310763_ranked
SLC8A3	0	0	0	0	1.52769	0	0	0	0	0	0	0	0	0	0	0	0	0	0	0	0	0	0	0	0	0	0	0	1.42395	0	0	0	0	0	0	0	2.95164	MICROARRAY: Chao27770432, RNASEQ: Hirani_37876024
ACE	0	0	0	0	0	0	0	0	0	0	0	0	0	0	0	1.49302	0	0	0	0	0	0	0	0	0	1.50841	0	0	1.42978	0	0	0	0	0	0	1.44288	2.95129	RNASEQ: Dong_36157523, SCRNASEQ: Scaffa_34417156_ranked
PTPN7	0	0	0	0	0	0	0	0	0	0	0	0	0	0	0	0	0	0	0	0	0	0	0	0	0	0	0	0	1.54116	0	0	0	1.40986	1.40722	1.40835	0	2.95102	SCRNASEQ: Hurskainen_33692365_endothelial, RNASEQ: Hirani_37876024
ENG	0	0	0	0	0	0	0	0	0	0	0	0	0	0	0	0	0	0	0	0	0	0	0	0	0	1.50841	0	0	0	0	0	0	1.40192	1.3995	1.39911	1.44242	2.95082	SCRNASEQ: Scaffa_34417156_ranked, RNASEQ: Dong_36157523
POSTN	0	0	0	0	0	0	0	0	0	0	0	0	0	0	0	0	0	0	0	0	0	0	0	0	0	1.50841	0	0	0	0	0	1.39386	0	0	0	1.44149	2.9499	SCRNASEQ: Scaffa_34417156_ranked, RNASEQ: Dong_36157523
UAP1L1	0	0	0	0	0	0	0	0	0	0	0	0	0	0	0	0	0	0	0	0	0	0	0	0	0	0	0	0	1.54598	0	0	0	1.40386	1.40136	1.40131	0	2.94984	SCRNASEQ: Hurskainen_33692365_endothelial, RNASEQ: Hirani_37876024
TRIM67	0	0	0	0	0	0	0	0	0	0	0	0	0	0	0	0	0	0	0	0	0	0	0	0	0	0	0	0	1.50505	0	0	0	0	0	0	1.44392	2.94897	SCRNASEQ: Scaffa_34417156_ranked, RNASEQ: Hirani_37876024
PCOLCE	0	0	0	0	0	0	0	0	0	0	0	0	0	0	0	0	0	0	0	0	0	0	0	0	0	1.50841	0	0	0	0	0	0	0	0	0	1.43985	2.94825	SCRNASEQ: Scaffa_34417156_ranked, RNASEQ: Dong_36157523
PRAG1	0	0	0	0	0	0	0	0	0	0	0	0	0	0	0	0	0	0	0	0	0	0	0	0	0	0	0	0	1.5042	0	0	0	0	0	0	1.44381	2.94801	SCRNASEQ: Scaffa_34417156_ranked, RNASEQ: Hirani_37876024
PGBD5	0	0	0	0	0	0	0	0	0	0	0	0	0	0	0	0	0	0	0	0	0	0	0	0	0	0	0	0	1.5059	0	0	0	0	0	0	1.4409	2.9468	SCRNASEQ: Scaffa_34417156_ranked, RNASEQ: Hirani_37876024
SEMA3D	0	1.55983	0	0	0	0	0	0	0	0	0	0	0	0	0	0	0	0	0	0	0	0	0	0	0	0	0	0	0	0	0	1.38627	0	0	0	0	2.9461	METHYLATION: Chen28689251, RNASEQ: Rao_37310763_ranked
ECM1	0	0	0	0	0	0	0	0	0	0	0	0	0	0	1.44339	1.49302	0	0	0	0	0	0	0	0	0	0	0	0	1.49976	0	0	0	0	0	0	1.44539	2.94516	RNASEQ: Hirani_37876024, SCRNASEQ: Scaffa_34417156_ranked
ZFP36	0	0	0	0	0	0	0	0	0	0	0	0	0	0	0	0	0	0	0	0	0	0	0	0	0	0	0	0	0	0	0	1.4983	0	0	0	1.44615	2.94446	SCRNASEQ: Scaffa_34417156_ranked, RNASEQ: Rao_37310763_ranked
CEBPB	0	0	0	0	0	0	0	0	0	0	0	0	0	0	0	0	0	0	0	0	0	0	0	0	0	0	0	0	0	0	0	1.49574	1.39095	0	0	1.44772	2.94347	SCRNASEQ: Scaffa_34417156_ranked, RNASEQ: Rao_37310763_ranked
RPL34	0	0	0	0	0	0	0	0	0	0	0	0	0	0	0	0	0	0	0	0	0	0	0	0	0	0	0	0	0	0	0	1.48883	0	0	0	1.45423	2.94306	SCRNASEQ: Scaffa_34417156_ranked, RNASEQ: Rao_37310763_ranked
FTH1	0	0	0	0	0	0	0	0	0	0	0	0	0	0	0	1.49302	0	0	0	0	0	0	0	0	0	0	0	0	1.4337	0	0	0	0	0	0	1.44996	2.94298	RNASEQ: Bhattacharya_25150061, SCRNASEQ: Scaffa_34417156_ranked
CTSH	0	0	0	0	0	0	0	0	0	0	0	0	0	0	0	1.49302	0	0	0	0	0	0	0	0	0	0	0	0	1.46516	0	0	0	0	0	0	1.44944	2.94246	RNASEQ: Bhattacharya_25150061, SCRNASEQ: Scaffa_34417156_ranked
CRLF1	0	0	0	0	0	0	0	0	0	0	0	0	0	0	0	1.49302	0	0	0	0	0	0	0	0	0	0	0	0	1.43989	0	0	0	0	0	0	1.4492	2.94222	RNASEQ: Bhattacharya_25150061, SCRNASEQ: Scaffa_34417156_ranked
CSTB	0	0	0	0	0	0	0	0	0	0	0	0	0	0	0	1.49302	0	0	0	0	0	0	0	0	0	0	0	0	1.43409	0	0	0	0	0	0	1.44908	2.9421	RNASEQ: Bhattacharya_25150061, SCRNASEQ: Scaffa_34417156_ranked
STK4	0	0	0	0	0	0	0	0	0	0	0	0	0	0	0	1.49302	0	0	0	0	0	0	0	0	0	0	0	0	1.42339	0	0	0	1.39166	1.38948	0	1.44891	2.94193	SCRNASEQ: Scaffa_34417156_ranked, RNASEQ: Bhattacharya_25150061
ST8SIA4	0	0	0	0	0	0	0	0	0	0	0	0	0	0	0	1.49305	0	0	0	0	0	0	0	0	0	0	0	0	1.43995	0	0	0	1.41143	1.40879	1.41019	1.44886	2.94191	SCRNASEQ: Scaffa_34417156_ranked, RNASEQ: Bhattacharya_25150061
PDZD2	0	0	0	0	0	0	0	0	0	0	0	0	0	0	0	1.49302	0	0	0	0	0	0	0	0	0	0	0	0	1.48381	0	0	0	0	0	0	1.44861	2.94163	RNASEQ: Bhattacharya_25150061, SCRNASEQ: Scaffa_34417156_ranked
SCN3B	0	0	0	0	0	0	0	0	0	0	0	0	0	0	0	1.49302	0	0	0	0	0	0	0	0	0	0	0	0	1.43551	0	0	0	0	0	0	1.44848	2.9415	RNASEQ: Bhattacharya_25150061, SCRNASEQ: Scaffa_34417156_ranked
EVL	0	0	0	0	0	0	0	0	0	0	0	0	0	0	0	0	0	0	0	0	0	0	0	0	0	0	0	0	1.50054	0	0	0	0	0	0	1.4408	2.94135	SCRNASEQ: Scaffa_34417156_ranked, RNASEQ: Hirani_37876024
CDK15	0	0	0	0	1.52769	0	0	0	0	0	0	0	0	0	0	0	0	0	0	0	0	0	0	0	0	0	0	0	0	0	0	0	0	0	1.41352	0	2.94121	SCRNASEQ: Hurskainen_33692365_stroma, MICROARRAY: Chao27770432
MIF	0	0	0	0	0	0	0	0	0	0	0	0	0	0	0	1.49302	0	0	0	0	0	0	0	0	0	0	0	0	1.44012	0	0	0	0	0	0	1.44811	2.94113	RNASEQ: Bhattacharya_25150061, SCRNASEQ: Scaffa_34417156_ranked
TYROBP	0	0	0	0	0	0	0	0	0	0	0	0	0	0	0	1.49302	0	0	0	0	0	0	0	0	0	0	0	0	0	0	0	0	0	0	0	1.44794	2.94096	RNASEQ: Bhattacharya_25150061, SCRNASEQ: Scaffa_34417156_ranked
TNFAIP2	0	0	0	0	0	0	0	0	0	0	0	0	0	0	0	1.49302	0	0	0	0	0	0	0	0	0	0	0	0	1.47413	0	0	0	0	0	0	1.44761	2.94062	RNASEQ: Bhattacharya_25150061, SCRNASEQ: Scaffa_34417156_ranked
APRT	0	0	0	0	0	0	0	0	0	0	0	0	0	0	0	1.49302	0	0	0	0	0	0	0	0	0	0	0	0	0	0	0	0	0	0	0	1.44752	2.94054	RNASEQ: Bhattacharya_25150061, SCRNASEQ: Scaffa_34417156_ranked
SPON2	0	0	0	0	0	0	0	0	0	0	0	0	0	0	0	1.49302	0	0	0	0	0	0	0	0	0	0	0	0	1.49492	0	0	1.3972	0	0	0	1.44538	2.9403	RNASEQ: Hirani_37876024, SCRNASEQ: Scaffa_34417156_ranked
PCOLCE2	0	0	0	0	0	0	0	0	0	0	0	0	0	0	0	1.49302	0	0	0	0	0	0	0	0	0	0	0	0	1.43465	0	0	0	0	0	0	1.44719	2.9402	RNASEQ: Bhattacharya_25150061, SCRNASEQ: Scaffa_34417156_ranked
PDGFRA	0	0	0	0	0	0	0	0	0	0	0	0	0	1.44962	1.44442	1.49302	0	0	0	0	0	0	0	0	0	0	0	0	1.48108	0	0	1.36939	0	0	0	1.44715	2.94017	RNASEQ: Bhattacharya_25150061, SCRNASEQ: Scaffa_34417156_ranked
PRKCQ	0	0	0	0	0	0	0	0	0	0	0	0	0	0	0	1.49302	0	0	0	0	0	0	0	0	0	0	0	0	1.53529	0	0	0	1.40486	1.40238	1.40248	0	2.94015	SCRNASEQ: Hurskainen_33692365_endothelial, RNASEQ: Hirani_37876024
CHST2	0	0	0	0	0	0	0	0	0	0	0	0	0	0	0	1.49302	0	0	0	0	0	0	0	0	0	0	0	0	1.42581	0	0	1.38371	0	0	0	1.44705	2.94007	RNASEQ: Bhattacharya_25150061, SCRNASEQ: Scaffa_34417156_ranked
SCN7A	0	0	0	0	0	0	0	0	0	0	0	0	0	0	1.44444	1.49302	0	0	0	0	0	0	0	0	0	0	0	0	1.4214	0	0	1.36204	1.40027	1.39787	1.39723	1.44694	2.93996	SCRNASEQ: Scaffa_34417156_ranked, RNASEQ: Bhattacharya_25150061
SEMA6A	0	0	0	0	0	0	0	0	0	0	0	0	0	0	0	1.49302	0	0	0	0	0	0	0	0	0	0	0	0	1.47202	0	0	0	0	0	0	1.44676	2.93978	RNASEQ: Bhattacharya_25150061, SCRNASEQ: Scaffa_34417156_ranked
HMCN1	0	0	0	0	0	0	0	0	0	0	0	0	0	1.44147	0	1.49302	0	0	0	0	0	0	0	0	0	0	0	0	0	0	0	0	1.40926	1.40662	1.40763	1.44656	2.93957	SCRNASEQ: Scaffa_34417156_ranked, RNASEQ: Bhattacharya_25150061
TTYH3	0	0	0	0	0	0	0	0	0	0	0	0	0	0	0	1.49302	0	0	0	0	0	0	0	0	0	0	0	0	1.43958	0	0	0	0	0	0	1.44649	2.93951	RNASEQ: Bhattacharya_25150061, SCRNASEQ: Scaffa_34417156_ranked
PIGN	0	0	0	0	1.52769	0	0	0	0	0	0	0	0	0	0	0	0	0	0	0	0	0	0	0	0	0	0	0	0	0	0	0	1.41132	1.4087	1.41008	0	2.93901	SCRNASEQ: Hurskainen_33692365_endothelial, MICROARRAY: Chao27770432
ETV1	0	0	0	0	0	0	0	0	0	0	0	0	0	0	0	1.49302	0	0	0	0	0	0	0	0	0	0	0	0	1.43998	0	0	0	0	0	0	1.44594	2.93896	RNASEQ: Bhattacharya_25150061, SCRNASEQ: Scaffa_34417156_ranked
Clec4a4	0	0	0	0	0	0	1.69115	0	0	0	0	0	0	0	0	0	0	0	0	0	1.24778	0	0	0	0	0	0	0	0	0	0	0	0	0	0	0	2.93893	RNASEQ: Coarfa_28818871_female_up_day7_ranked, MICROARRAY: Denervaud_26353077_up_ranked
CD81	0	0	0	0	0	0	0	0	0	0	0	0	0	0	0	0	0	0	0	0	0	0	0	0	0	0	0	0	0	0	0	1.3617	0	0	0	1.57714	2.93884	SCRNASEQ: Scaffa_34417156_ranked, RNASEQ: Rao_37310763_ranked
GCLC	0	0	0	0	0	0	0	0	0	0	0	0	0	0	0	1.49302	0	0	0	0	0	0	0	0	0	0	0	0	1.45052	0	0	1.42412	0	0	0	1.44574	2.93876	RNASEQ: Bhattacharya_25150061, SCRNASEQ: Scaffa_34417156_ranked
MARCO	0	0	0	0	0	0	0	0	0	0	0	0	0	1.4509	0	1.49302	0	0	0	0	0	0	0	0	0	0	0	0	1.45688	0	0	0	1.41095	1.40834	1.40964	1.44551	2.93853	SCRNASEQ: Scaffa_34417156_ranked, RNASEQ: Bhattacharya_25150061
LTBP2	0	0	0	0	0	0	0	0	0	0	0	0	0	0	0	1.49302	0	0	0	0	0	0	0	0	0	0	0	0	0	0	0	0	0	0	0	1.44545	2.93847	RNASEQ: Bhattacharya_25150061, SCRNASEQ: Scaffa_34417156_ranked
EGFLAM	0	0	0	0	0	0	0	0	0	0	0	0	0	0	0	1.49302	0	0	0	0	0	0	0	0	0	0	0	0	1.44346	0	0	0	0	0	0	1.44539	2.93841	RNASEQ: Bhattacharya_25150061, SCRNASEQ: Scaffa_34417156_ranked
AKAP6	0	1.55983	0	0	0	0	0	0	0	0	0	0	0	0	0	0	0	0	0	0	0	0	0	0	0	0	0	0	0	0	0	1.37838	0	0	0	0	2.93821	METHYLATION: Chen28689251, RNASEQ: Rao_37310763_ranked
MAPT	0	0	0	0	0	0	0	0	0	0	0	0	0	0	0	1.49302	0	0	0	0	0	0	0	0	0	0	0	0	1.4225	0	0	0	0	0	0	1.44512	2.93814	RNASEQ: Bhattacharya_25150061, SCRNASEQ: Scaffa_34417156_ranked
SLC38A5	0	0	0	0	0	0	0	0	0	0	0	0	0	0	0	1.49302	0	0	0	0	0	0	0	0	0	0	0	0	1.46485	0	0	0	0	0	0	1.44507	2.93809	RNASEQ: Bhattacharya_25150061, SCRNASEQ: Scaffa_34417156_ranked
PODXL2	0	0	0	0	0	0	0	0	0	0	0	0	0	0	0	1.49302	0	0	0	0	0	0	0	0	0	0	0	0	1.47708	0	0	0	0	0	0	1.44482	2.93784	RNASEQ: Bhattacharya_25150061, SCRNASEQ: Scaffa_34417156_ranked
ARHGAP20	0	0	0	0	0	0	0	0	0	0	0	0	0	0	0	1.49302	0	0	0	0	0	0	0	0	0	0	0	0	0	0	0	0	0	0	0	1.4445	2.93752	RNASEQ: Bhattacharya_25150061, SCRNASEQ: Scaffa_34417156_ranked
PDLIM3	0	0	0	0	0	0	0	0	0	0	0	0	0	0	0	1.49302	0	0	0	0	0	0	0	0	0	0	0	0	1.45448	0	0	0	0	0	0	1.4441	2.93711	RNASEQ: Bhattacharya_25150061, SCRNASEQ: Scaffa_34417156_ranked
PDE5A	0	0	0	0	0	0	0	0	0	0	0	0	0	0	0	1.49302	0	0	0	0	0	0	0	0	0	0	0	0	1.43982	0	0	0	0	0	0	1.44409	2.93711	RNASEQ: Bhattacharya_25150061, SCRNASEQ: Scaffa_34417156_ranked
CD248	0	0	0	0	0	0	0	0	0	0	0	0	0	0	0	1.49302	0	0	0	0	0	0	0	0	0	0	0	0	1.44597	0	0	0	0	0	0	1.44399	2.937	RNASEQ: Bhattacharya_25150061, SCRNASEQ: Scaffa_34417156_ranked
ADGRG6	0	0	0	0	0	0	0	0	0	0	0	0	0	0	0	1.49302	0	0	0	0	0	0	0	0	0	0	0	0	1.43519	0	0	0	0	0	0	1.44388	2.9369	RNASEQ: Bhattacharya_25150061, SCRNASEQ: Scaffa_34417156_ranked
RFLNB	0	0	0	0	0	0	0	0	0	0	0	0	0	0	0	0	0	0	0	0	0	0	0	0	0	0	0	0	0	0	0	1.49323	0	0	0	1.44357	2.93681	SCRNASEQ: Scaffa_34417156_ranked, RNASEQ: Rao_37310763_ranked
STAT1	0	0	0	0	0	0	0	0	0	0	0	0	0	0	1.4435	0	0	0	0	0	0	0	0	0	0	0	0	0	0	1.52158	0	0	1.41495	1.41237	1.41429	0	2.93653	SCRNASEQ: Hurskainen_33692365_endothelial, RNASEQ: Nitkin_32753701_24hr_unranked
SH3PXD2A	0	0	0	0	0	0	0	0	0	0	0	0	0	0	0	1.49302	0	0	0	0	0	0	0	0	0	0	0	0	0	0	0	0	0	0	0	1.44334	2.93636	RNASEQ: Bhattacharya_25150061, SCRNASEQ: Scaffa_34417156_ranked
NIBAN1	0	0	0	0	0	0	0	0	0	0	0	0	0	0	0	1.49302	0	0	0	0	0	0	0	0	0	0	0	0	1.43196	0	0	0	1.40919	1.40656	1.40756	1.44314	2.93616	SCRNASEQ: Scaffa_34417156_ranked, RNASEQ: Bhattacharya_25150061
NR1D1	0	0	0	0	0	0	0	0	0	0	0	0	0	0	1.44329	0	0	0	0	0	0	0	0	0	0	0	0	0	1.48672	0	0	0	0	0	0	1.44928	2.936	SCRNASEQ: Scaffa_34417156_ranked, RNASEQ: Hirani_37876024
TMEM252	0	1.55983	0	0	0	0	0	0	0	0	0	0	0	0	0	0	0	0	0	0	0	0	0	0	0	0	0	0	0	0	1.37591	0	0	0	0	0	2.93575	METHYLATION: Chen28689251, RNASEQ: Nitkin_32753701_6hr_unranked
RNF180	0	1.55983	0	0	0	0	0	0	0	0	0	0	0	0	0	0	0	0	0	0	0	0	0	0	0	0	0	0	0	0	0	1.3757	0	0	0	0	2.93553	METHYLATION: Chen28689251, RNASEQ: Rao_37310763_ranked
NR1I3	0	0	0	0	1.52769	0	0	0	0	0	0	0	0	0	0	0	0	0	0	0	0	0	0	0	0	0	0	0	0	0	0	0	1.40747	1.4049	1.40551	0	2.93516	SCRNASEQ: Hurskainen_33692365_endothelial, MICROARRAY: Chao27770432
FMN2	0	0	0	0	1.52769	0	0	0	0	0	0	0	0	0	0	0	0	0	0	0	0	0	0	0	0	0	0	0	0	0	0	0	1.40682	0	1.40474	0	2.93451	SCRNASEQ: Hurskainen_33692365_endothelial, MICROARRAY: Chao27770432
DCHS1	0	0	0	0	0	0	0	0	0	0	0	0	0	0	0	1.49302	0	0	0	0	0	0	0	0	0	0	0	0	0	0	0	0	0	0	0	1.44113	2.93414	RNASEQ: Bhattacharya_25150061, SCRNASEQ: Scaffa_34417156_ranked
SP100	0	0	0	0	0	0	0	0	0	0	0	0	0	0	0	0	0	0	0	0	0	0	0	0	0	0	0	0	0	1.52158	0	0	1.41251	1.40992	1.4115	0	2.93408	SCRNASEQ: Hurskainen_33692365_endothelial, RNASEQ: Nitkin_32753701_24hr_unranked
MARCHF1	0	0	0	0	1.52769	0	0	0	0	0	0	0	0	0	0	0	0	0	0	0	0	0	0	0	0	0	0	0	0	0	0	0	1.40605	1.40354	1.40383	0	2.93374	SCRNASEQ: Hurskainen_33692365_endothelial, MICROARRAY: Chao27770432
ENPP1	0	0	0	0	0	0	0	0	0	0	0	0	0	0	0	1.49302	0	0	0	0	0	0	0	0	0	0	0	0	1.46986	0	0	1.40526	0	0	0	1.44065	2.93367	RNASEQ: Bhattacharya_25150061, SCRNASEQ: Scaffa_34417156_ranked
GPC1	0	0	0	0	0	0	0	0	0	0	0	0	0	0	0	0	0	0	0	0	0	0	0	0	0	0	0	0	0	1.52158	0	0	1.41174	1.40912	1.41057	0	2.93332	SCRNASEQ: Hurskainen_33692365_endothelial, RNASEQ: Nitkin_32753701_24hr_unranked
MAPKAPK2	0	0	0	0	0	0	0	0	0	0	0	0	0	0	0	0	0	0	0	0	0	0	0	0	0	0	0	0	0	1.52158	0	0	1.41056	1.40796	1.40918	0	2.93214	SCRNASEQ: Hurskainen_33692365_endothelial, RNASEQ: Nitkin_32753701_24hr_unranked
PIP5K1B	0	1.55983	0	0	0	0	0	0	0	0	0	0	0	0	0	0	0	0	0	0	0	0	0	0	0	0	0	0	0	0	0	1.37182	0	0	0	0	2.93166	METHYLATION: Chen28689251, RNASEQ: Rao_37310763_ranked
ZNF444	0	1.55983	0	0	0	0	0	0	0	0	0	0	0	0	0	0	0	0	0	0	0	0	0	0	0	0	0	0	0	0	0	1.37148	0	0	0	0	2.93131	METHYLATION: Chen28689251, RNASEQ: Rao_37310763_ranked
PLA2G4A	0	0	0	0	0	0	0	0	0	0	0	0	0	1.44336	0	0	0	0	0	0	0	0	0	0	0	0	0	0	1.44497	1.52158	0	0	1.40932	1.40668	1.4077	0	2.9309	SCRNASEQ: Hurskainen_33692365_endothelial, RNASEQ: Nitkin_32753701_24hr_unranked
FIBIN	0	0	0	0	0	0	0	0	0	0	0	0	0	0	0	0	0	0	0	0	0	0	0	0	0	0	0	0	1.48353	0	0	0	1.39739	1.39509	1.39389	1.44714	2.93067	SCRNASEQ: Scaffa_34417156_ranked, RNASEQ: Hirani_37876024
CEBPD	0	0	0	0	0	0	0	0	0	0	0	0	0	0	0	0	0	0	0	0	0	0	0	0	0	0	0	0	0	0	0	1.48365	0	0	0	1.44573	2.92938	SCRNASEQ: Scaffa_34417156_ranked, RNASEQ: Rao_37310763_ranked
SH3GL3	0	1.55983	0	0	0	0	0	0	0	0	0	0	0	0	0	0	0	0	0	0	0	0	0	0	0	0	0	0	0	0	0	1.36951	0	0	0	0	2.92934	METHYLATION: Chen28689251, RNASEQ: Rao_37310763_ranked
RABGAP1	0	0	0	0	1.52769	0	0	0	0	0	0	0	0	0	0	0	0	0	0	0	0	0	0	0	0	0	0	0	0	0	0	0	1.40129	1.39887	1.3984	0	2.92897	SCRNASEQ: Hurskainen_33692365_endothelial, MICROARRAY: Chao27770432
MEGF10	0	0	0	0	0	0	0	0	0	0	0	0	0	0	0	0	0	0	0	0	0	0	0	0	0	0	0	0	1.48825	0	0	0	0	0	0	1.44062	2.92887	SCRNASEQ: Scaffa_34417156_ranked, RNASEQ: Hirani_37876024
ADD3	0	1.55983	0	0	0	0	0	0	0	0	0	0	0	0	0	0	0	0	0	0	0	0	0	0	0	0	0	0	0	0	0	1.36893	0	0	0	0	2.92876	METHYLATION: Chen28689251, RNASEQ: Rao_37310763_ranked
LYVE1	0	0	0	0	0	0	0	0	0	0	0	0	0	0	0	0	0	0	0	0	0	0	0	0	0	0	0	0	1.4682	0	0	0	0	0	0	1.4604	2.9286	SCRNASEQ: Scaffa_34417156_ranked, RNASEQ: Hirani_37876024
FKBP4	0	0	0	0	0	0	0	0	0	0	0	0	0	1.47915	1.44335	0	0	0	0	0	0	0	0	0	0	0	0	0	0	0	0	0	0	0	0	1.44913	2.92827	SCRNASEQ: Scaffa_34417156_ranked, RNASEQ: Al_mudares_37368978_female
PSEN2	0	0	0	0	0	0	0	0	0	0	0	0	0	0	0	0	0	0	0	0	0	0	0	0	0	0	0	0	0	1.52158	0	1.37477	1.40649	1.40398	1.40437	0	2.92807	SCRNASEQ: Hurskainen_33692365_endothelial, RNASEQ: Nitkin_32753701_24hr_unranked
VASH2	0	0	0	0	0	0	0	0	0	0	0	0	0	0	0	0	0	0	0	0	0	0	0	0	0	0	0	0	1.44021	1.52158	0	0	1.40577	1.40327	1.40353	0	2.92735	SCRNASEQ: Hurskainen_33692365_endothelial, RNASEQ: Nitkin_32753701_24hr_unranked
CCL20	0	0	0	0	0	0	0	0	0	0	0	0	0	0	0	0	0	0	0	0	0	0	0	0	0	0	0	0	1.51415	0	0	0	1.41261	1.41003	1.41161	0	2.92676	SCRNASEQ: Hurskainen_33692365_endothelial, RNASEQ: Hirani_37876024
CD55	0	0	0	0	0	0	0	0	0	0	0	0	0	0	0	1.49302	0	0	0	0	0	0	0	0	0	0	0	0	1.51563	0	0	0	1.41066	1.40806	1.40929	0	2.92629	SCRNASEQ: Hurskainen_33692365_endothelial, RNASEQ: Hirani_37876024
AGGF1	0	0	0	0	0	0	0	0	0	0	0	0	0	1.44724	0	0	0	0	0	0	0	0	0	0	0	0	0	0	0	0	0	0	0	0	0	1.47871	2.92595	SCRNASEQ: Scaffa_34417156_ranked, RNASEQ: Al_mudares_37368978_female
IL1RN	0	0	0	0	0	0	0	0	0	0	0	0	0	0	0	0	0	0	0	0	0	0	0	0	0	0	0	0	0	1.52158	0	1.49028	1.40422	1.40173	1.40173	0	2.9258	SCRNASEQ: Hurskainen_33692365_endothelial, RNASEQ: Nitkin_32753701_24hr_unranked
TIFA	0	1.55983	0	0	0	0	0	0	0	0	0	0	0	0	0	0	0	0	0	0	0	0	0	0	0	0	0	0	0	0	0	1.36571	0	0	0	0	2.92554	METHYLATION: Chen28689251, RNASEQ: Rao_37310763_ranked
COMMD3	0	0	0	0	0	0	0	0	0	0	0	0	0	0	0	0	0	0	0	0	0	0	0	0	0	0	0	0	1.48215	0	0	0	1.4045	1.40202	1.40205	1.44335	2.92551	SCRNASEQ: Scaffa_34417156_ranked, RNASEQ: Hirani_37876024
MXRA8	0	0	0	0	0	0	0	0	0	0	0	0	0	0	0	0	0	0	0	0	0	0	0	0	0	0	0	0	1.48437	0	0	0	0	0	0	1.44108	2.92545	SCRNASEQ: Scaffa_34417156_ranked, RNASEQ: Hirani_37876024
PSTK	0	1.55983	0	0	0	0	0	0	0	0	0	0	0	0	0	0	0	0	0	0	0	0	0	0	0	0	0	0	0	0	0	1.36534	0	0	0	0	2.92517	METHYLATION: Chen28689251, RNASEQ: Rao_37310763_ranked
SMIM3	0	1.55983	0	0	0	0	0	0	0	0	0	0	0	0	0	0	0	0	0	0	0	0	0	0	0	0	0	0	0	0	0	1.36479	0	0	0	0	2.92462	METHYLATION: Chen28689251, RNASEQ: Rao_37310763_ranked
BMP2	0	0	0	0	0	0	0	0	0	0	0	0	0	0	0	0	0	0	0	0	0	0	0	0	0	0	0	0	1.48297	0	0	0	1.39439	1.39217	1.39046	1.44163	2.9246	SCRNASEQ: Scaffa_34417156_ranked, RNASEQ: Hirani_37876024
SAMD14	0	0	0	0	0	0	0	0	0	0	0	0	0	0	0	0	0	0	0	0	0	0	0	0	0	0	0	0	1.48135	0	0	1.36753	0	0	0	1.44267	2.92402	SCRNASEQ: Scaffa_34417156_ranked, RNASEQ: Hirani_37876024
SNAP23	0	0	0	0	1.52769	0	0	0	0	0	0	0	0	0	0	0	0	0	0	0	0	0	0	0	0	0	0	0	0	0	0	0	1.39631	1.39408	1.39266	0	2.924	SCRNASEQ: Hurskainen_33692365_endothelial, MICROARRAY: Chao27770432
YEATS2	0	1.55983	0	0	0	0	0	0	0	0	0	0	0	0	0	0	0	0	0	0	0	0	0	0	0	0	0	0	0	0	0	1.36353	0	0	0	0	2.92336	METHYLATION: Chen28689251, RNASEQ: Rao_37310763_ranked
TMEM45A	0	1.55983	0	0	0	0	0	0	0	0	0	0	0	0	0	0	0	0	0	0	0	0	0	0	0	0	0	0	0	0	0	1.36343	0	0	0	0	2.92326	METHYLATION: Chen28689251, RNASEQ: Rao_37310763_ranked
OCLN	0	1.55983	0	0	0	0	0	0	0	0	0	0	0	0	0	0	0	0	0	0	0	0	0	0	0	0	0	0	0	0	0	1.36327	0	0	0	0	2.9231	METHYLATION: Chen28689251, RNASEQ: Rao_37310763_ranked
PIK3C2G	0	1.55983	0	0	0	0	0	0	0	0	0	0	0	0	0	0	0	0	0	0	0	0	0	0	0	0	0	0	0	0	0	1.3629	0	0	0	0	2.92273	METHYLATION: Chen28689251, RNASEQ: Rao_37310763_ranked
ARAP1	0	0	0	0	0	0	0	0	0	0	0	0	0	0	0	0	0	0	0	0	0	0	0	0	0	0	0	0	1.47592	0	0	0	0	0	0	1.44644	2.92236	SCRNASEQ: Scaffa_34417156_ranked, RNASEQ: Hirani_37876024
FOXC1	0	1.55983	0	0	0	0	0	0	0	0	0	0	0	0	0	0	0	0	0	0	0	0	0	0	0	0	0	0	0	0	0	1.36248	0	0	0	0	2.92231	METHYLATION: Chen28689251, RNASEQ: Rao_37310763_ranked
NR4A2	0	0	0	0	0	0	0	0	0	0	0	0	0	0	0	0	0	0	0	0	0	0	0	0	0	0	0	0	0	1.52158	0	0	1.40072	1.39831	1.39776	0	2.9223	SCRNASEQ: Hurskainen_33692365_endothelial, RNASEQ: Nitkin_32753701_24hr_unranked
Cmtm2a	0	1.55983	0	0	0	0	0	0	0	0	0	0	0	0	0	0	0	0	0	0	0	0	0	0	0	0	0	0	0	0	0	1.36234	0	0	0	0	2.92217	METHYLATION: Chen28689251, RNASEQ: Rao_37310763_ranked
MARCKSL1	0	0	0	0	0	0	0	0	0	0	0	0	0	0	0	0	0	0	0	0	0	0	0	0	0	0	0	0	1.46767	0	0	0	0	0	0	1.45442	2.92209	SCRNASEQ: Scaffa_34417156_ranked, RNASEQ: Hirani_37876024
RAB3C	0	1.55983	0	0	0	0	0	0	0	0	0	0	0	0	0	0	0	0	0	0	0	0	0	0	0	0	0	0	0	0	0	1.36225	0	0	0	0	2.92208	METHYLATION: Chen28689251, RNASEQ: Rao_37310763_ranked
SNAP25	0	0	0	0	1.52769	0	0	0	0	0	0	0	0	0	0	0	0	0	0	0	0	0	0	0	0	0	0	0	0	0	0	0	1.39431	1.39211	1.39036	0	2.922	SCRNASEQ: Hurskainen_33692365_endothelial, MICROARRAY: Chao27770432
PRELID2	0	1.55983	0	0	0	0	0	0	0	0	0	0	0	0	0	0	0	0	0	0	0	0	0	0	0	0	0	0	0	0	0	1.36203	0	0	0	0	2.92186	METHYLATION: Chen28689251, RNASEQ: Rao_37310763_ranked
WDR37	0	1.55983	0	0	0	0	0	0	0	0	0	0	0	0	0	0	0	0	0	0	0	0	0	0	0	0	0	0	0	0	0	1.36189	0	0	0	0	2.92173	METHYLATION: Chen28689251, RNASEQ: Rao_37310763_ranked
TNPO2	0	1.55983	0	0	0	0	0	0	0	0	0	0	0	0	0	0	0	0	0	0	0	0	0	0	0	0	0	0	0	0	0	1.36187	0	0	0	0	2.9217	METHYLATION: Chen28689251, RNASEQ: Rao_37310763_ranked
MTSS2	0	0	0	0	0	0	0	0	0	0	0	0	0	0	0	0	0	0	0	0	0	0	0	0	0	0	0	0	1.47457	0	0	0	0	0	0	1.44713	2.9217	SCRNASEQ: Scaffa_34417156_ranked, RNASEQ: Hirani_37876024
ARMC1	0	1.55983	0	0	0	0	0	0	0	0	0	0	0	0	0	0	0	0	0	0	0	0	0	0	0	0	0	0	0	0	0	1.36184	0	0	0	0	2.92167	METHYLATION: Chen28689251, RNASEQ: Rao_37310763_ranked
THNSL2	0	1.55983	0	0	0	0	0	0	0	0	0	0	0	0	0	0	0	0	0	0	0	0	0	0	0	0	0	0	0	0	0	1.36182	0	0	0	0	2.92165	METHYLATION: Chen28689251, RNASEQ: Rao_37310763_ranked
NAT1	0	1.55983	0	0	0	0	0	0	0	0	0	0	0	0	0	0	0	0	0	0	0	0	0	0	0	0	0	0	0	0	0	1.36178	0	0	0	0	2.92162	METHYLATION: Chen28689251, RNASEQ: Rao_37310763_ranked
PLCXD2	0	1.55983	0	0	0	0	0	0	0	0	0	0	0	0	0	0	0	0	0	0	0	0	0	0	0	0	0	0	0	0	0	1.36174	0	0	0	0	2.92157	METHYLATION: Chen28689251, RNASEQ: Rao_37310763_ranked
ELAVL2	0	1.55983	0	0	0	0	0	0	0	0	0	0	0	0	0	0	0	0	0	0	0	0	0	0	0	0	0	0	0	0	0	1.36174	0	0	0	0	2.92157	METHYLATION: Chen28689251, RNASEQ: Rao_37310763_ranked
MAPK8	0	1.55983	0	0	0	0	0	0	0	0	0	0	0	0	0	0	0	0	0	0	0	0	0	0	0	0	0	0	0	0	0	1.36171	0	0	0	0	2.92154	METHYLATION: Chen28689251, RNASEQ: Rao_37310763_ranked
ZNF778	0	1.55983	0	0	0	0	0	0	0	0	0	0	0	0	0	0	0	0	0	0	0	0	0	0	0	0	0	0	0	0	0	1.36168	0	0	0	0	2.92151	METHYLATION: Chen28689251, RNASEQ: Rao_37310763_ranked
ACKR3	0	0	0	0	0	0	0	0	0	0	0	0	0	0	0	0	0	0	0	0	0	0	0	0	0	1.50841	0	0	1.44257	0	0	1.39511	1.41203	1.40941	1.4109	0	2.92044	SCRNASEQ: Hurskainen_33692365_endothelial, RNASEQ: Dong_36157523
NAPSA	0	0	0	0	0	0	0	0	0	0	0	0	0	0	0	0	0	0	0	0	0	0	0	0	0	0	0	0	1.47063	0	0	0	0	0	0	1.44933	2.91996	SCRNASEQ: Scaffa_34417156_ranked, RNASEQ: Hirani_37876024
RGS2	0	0	0	0	0	0	0	0	0	0	0	0	0	0	0	0	0	0	0	0	0	0	0	0	0	0	0	0	1.47243	0	0	1.36691	1.40937	1.40672	1.40777	1.4471	2.91953	SCRNASEQ: Scaffa_34417156_ranked, RNASEQ: Hirani_37876024
SHISA2	0	0	0	0	0	0	0	0	0	0	0	0	0	0	0	0	0	0	0	0	0	0	0	0	0	0	0	0	1.47348	0	0	0	0	0	0	1.4454	2.91888	SCRNASEQ: Scaffa_34417156_ranked, RNASEQ: Hirani_37876024
GREM1	0	0	0	0	0	0	0	0	0	0	0	0	0	0	0	0	0	0	0	0	0	0	0	0	0	0	0	0	0	1.52158	0	1.44429	1.39716	1.3949	1.39362	0	2.91873	SCRNASEQ: Hurskainen_33692365_endothelial, RNASEQ: Nitkin_32753701_24hr_unranked
PLTP	0	0	0	0	0	0	0	0	0	0	0	0	0	0	0	0	0	0	0	0	0	0	0	0	0	0	0	0	0	0	0	1.36218	1.39137	1.3892	0	1.55611	2.91829	SCRNASEQ: Scaffa_34417156_ranked, RNASEQ: Rao_37310763_ranked
IGF2R	0	0	0	0	0	0	0	0	0	0	0	0	0	0	0	0	0	0	0	0	0	0	0	0	0	0	0	0	1.47391	0	0	0	0	0	0	1.44429	2.9182	SCRNASEQ: Scaffa_34417156_ranked, RNASEQ: Hirani_37876024
PAPPA2	0	0	0	0	0	0	0	0	0	0	0	0	0	0	0	0	0	0	0	0	0	0	0	0	0	1.50841	0	0	0	0	0	0	1.40861	1.40602	1.40687	0	2.91702	SCRNASEQ: Hurskainen_33692365_endothelial, RNASEQ: Dong_36157523
EFNB1	0	0	0	0	0	0	0	0	0	0	0	0	0	0	0	0	0	0	0	0	0	0	0	0	0	0	0	0	1.47685	0	0	0	0	0	0	1.44	2.91685	SCRNASEQ: Scaffa_34417156_ranked, RNASEQ: Hirani_37876024
MERTK	0	0	0	0	0	0	0	0	0	0	0	0	0	0	0	0	0	0	0	0	0	0	0	0	0	0	0	0	0	1.52158	0	0	1.3952	1.39294	1.39136	0	2.91677	SCRNASEQ: Hurskainen_33692365_endothelial, RNASEQ: Nitkin_32753701_24hr_unranked
INMT	0	0	0	0	0	0	0	0	0	0	0	0	0	0	0	0	0	0	0	0	0	0	0	0	0	0	0	0	1.43008	0	0	1.46772	0	0	0	1.44896	2.91668	SCRNASEQ: Scaffa_34417156_ranked, RNASEQ: Rao_37310763_ranked
ISLR	0	0	0	0	0	0	0	0	0	0	0	0	0	0	0	0	0	0	0	0	0	0	0	0	0	0	0	0	1.47122	0	0	0	0	0	0	1.44543	2.91665	SCRNASEQ: Scaffa_34417156_ranked, RNASEQ: Hirani_37876024
IL1B	0	0	0	0	0	0	0	0	0	0	0	0	0	0	1.44259	0	0	1.28849	0	0	0	0	0	0	0	0	0	0	0	1.52158	0	1.50144	1.39505	1.3928	1.3912	0	2.91663	SCRNASEQ: Hurskainen_33692365_endothelial, RNASEQ: Nitkin_32753701_24hr_unranked
SFT2D2	0	0	0	0	0	0	0	0	0	0	0	0	0	0	0	0	0	0	0	0	0	0	0	0	0	1.50841	0	0	0	0	0	0	1.40803	1.40545	1.40616	0	2.91644	SCRNASEQ: Hurskainen_33692365_endothelial, RNASEQ: Dong_36157523
SMOX	0	0	0	0	0	0	0	0	0	0	0	0	0	0	0	0	0	0	0	0	0	0	0	0	0	0	0	0	0	1.52158	1.37591	1.36607	1.3946	1.39238	1.39069	0	2.91618	SCRNASEQ: Hurskainen_33692365_endothelial, RNASEQ: Nitkin_32753701_24hr_unranked
ISM1	0	0	0	0	0	0	0	0	0	0	0	0	0	0	0	0	0	0	0	0	0	0	0	0	0	0	0	0	0	1.52158	0	0	1.39425	1.39203	1.39027	0	2.91583	SCRNASEQ: Hurskainen_33692365_endothelial, RNASEQ: Nitkin_32753701_24hr_unranked
RBM3	0	0	0	0	0	0	0	0	0	0	0	0	0	1.46494	0	0	0	0	0	0	0	0	0	0	0	0	0	0	0	0	0	0	0	0	0	1.45073	2.91567	SCRNASEQ: Scaffa_34417156_ranked, RNASEQ: Al_mudares_37368978_female
CCN4	0	0	0	0	0	0	0	0	0	0	0	0	0	0	0	0	0	0	0	0	0	0	0	0	0	0	0	0	0	0	0	1.47306	0	0	0	1.44238	2.91545	SCRNASEQ: Scaffa_34417156_ranked, RNASEQ: Rao_37310763_ranked
HCK	0	0	0	0	0	0	0	0	0	0	0	0	0	0	0	0	0	0	0	0	0	0	0	0	0	0	0	0	0	1.52158	0	0	1.39312	1.39095	1.38892	0	2.9147	SCRNASEQ: Hurskainen_33692365_endothelial, RNASEQ: Nitkin_32753701_24hr_unranked
FCER2	0	0	0	0	0	0	0	0	0	0	0	0	0	0	0	0	0	0	0	0	0	0	0	0	0	0	0	0	0	0	0	1.46495	0	0	0	1.44895	2.9139	SCRNASEQ: Scaffa_34417156_ranked, RNASEQ: Rao_37310763_ranked
TGM2	0	0	0	0	0	0	0	0	0	0	0	0	0	0	0	0	0	0	0	0	0	0	0	0	0	0	0	0	0	1.52158	0	0	1.39211	1.38994	1.38772	0	2.91368	SCRNASEQ: Hurskainen_33692365_endothelial, RNASEQ: Nitkin_32753701_24hr_unranked
FERMT1	0	0	0	0	0	0	0	0	0	0	0	0	0	0	0	0	0	0	0	0	0	0	0	0	0	0	0	0	1.51919	0	0	0	1.39441	1.39218	1.39047	0	2.9136	SCRNASEQ: Hurskainen_33692365_endothelial, RNASEQ: Hirani_37876024
MRC1	0	0	0	0	0	0	0	0	0	0	0	0	0	0	0	0	0	0	0	0	0	0	0	0	0	1.50841	0	0	1.42688	0	0	0	1.40461	1.40213	1.40221	0	2.91302	SCRNASEQ: Hurskainen_33692365_endothelial, RNASEQ: Dong_36157523
CACNB3	0	0	0	0	0	0	0	0	0	0	0	0	0	0	0	0	0	0	0	0	0	0	0	0	0	0	0	0	1.46911	0	0	0	0	0	0	1.44351	2.91263	SCRNASEQ: Scaffa_34417156_ranked, RNASEQ: Hirani_37876024
NFIL3	0	0	0	0	0	0	0	0	0	0	0	0	0	0	0	0	0	0	0	0	0	0	0	0	0	0	0	0	0	0	0	1.47057	0	0	0	1.44164	2.91221	SCRNASEQ: Scaffa_34417156_ranked, RNASEQ: Rao_37310763_ranked
DYNLL1	0	0	0	0	0	0	0	0	0	0	0	0	0	1.44918	1.44322	0	0	0	0	0	0	0	0	0	0	0	0	0	0	0	0	0	0	0	0	1.46294	2.91212	SCRNASEQ: Scaffa_34417156_ranked, RNASEQ: Al_mudares_37368978_female
NT5DC2	0	0	0	0	0	0	0	0	0	0	0	0	0	0	0	0	0	0	0	0	0	0	0	0	0	0	0	0	1.46581	0	0	0	0	0	0	1.44618	2.91199	SCRNASEQ: Scaffa_34417156_ranked, RNASEQ: Hirani_37876024
DUSP10	0	0	0	0	0	0	0	0	0	0	0	0	0	0	0	0	0	0	0	0	0	0	0	0	0	0	0	0	1.4675	0	0	0	1.40609	1.40357	1.40388	1.4437	2.9112	SCRNASEQ: Scaffa_34417156_ranked, RNASEQ: Hirani_37876024
DPP4	0	0	0	0	0	0	0	0	0	0	0	0	0	0	0	0	0	0	0	0	0	0	0	0	0	0	0	0	1.46438	0	0	0	1.40044	1.39803	1.39744	1.4458	2.91018	SCRNASEQ: Scaffa_34417156_ranked, RNASEQ: Hirani_37876024
PRRG4	0	0	0	0	0	0	0	0	0	0	0	0	0	0	0	0	0	0	0	0	0	0	0	0	0	0	0	0	1.51223	0	0	0	1.39763	1.39531	1.39417	0	2.90986	SCRNASEQ: Hurskainen_33692365_endothelial, RNASEQ: Hirani_37876024
ADHFE1	0	0	0	0	0	0	0	0	0	0	0	0	0	0	0	1.49302	0	0	0	0	0	0	0	0	0	0	0	0	1.43839	0	0	1.36598	1.41681	1.41417	1.41644	0	2.90982	SCRNASEQ: Hurskainen_33692365_endothelial, RNASEQ: Bhattacharya_25150061
MYBL1	0	0	0	0	0	0	0	0	0	0	0	0	0	0	0	1.49302	0	0	0	0	0	0	0	0	0	0	0	0	0	0	0	0	1.41679	1.41416	1.41642	0	2.90981	SCRNASEQ: Hurskainen_33692365_endothelial, RNASEQ: Bhattacharya_25150061
PKHD1	0	0	0	0	0	0	0	0	0	0	0	0	0	0	0	0	0	0	0	0	0	0	0	0	0	0	0	0	1.49248	0	0	0	1.41635	1.41373	0	0	2.90883	SCRNASEQ: Hurskainen_33692365_endothelial, RNASEQ: Hirani_37876024
AGT	0	0	0	0	0	0	0	0	0	0	0	0	0	0	0	0	0	0	0	0	0	0	0	0	0	0	0	0	1.46469	0	0	0	0	0	0	1.44412	2.90881	SCRNASEQ: Scaffa_34417156_ranked, RNASEQ: Hirani_37876024
MANF	0	0	0	0	0	0	0	0	0	0	0	0	0	1.45917	0	0	0	0	0	0	0	0	0	0	0	0	0	0	0	0	0	1.37144	0	0	0	1.44904	2.90821	SCRNASEQ: Scaffa_34417156_ranked, RNASEQ: Al_mudares_37368978_female
BSCL2	0	0	0	0	0	0	0	0	0	0	0	0	0	0	1.45943	0	0	0	0	0	0	0	0	0	0	0	0	0	0	0	0	0	1.39241	1.39024	1.38807	1.44825	2.90769	SCRNASEQ: Scaffa_34417156_ranked, RNASEQ: Al_mudares_37368978_male
AOX1	0	0	0	0	0	0	0	0	0	0	0	0	0	0	0	1.49302	0	0	0	0	0	0	0	0	0	0	0	0	1.44233	0	0	0	1.41452	1.41193	1.4138	0	2.90753	SCRNASEQ: Hurskainen_33692365_endothelial, RNASEQ: Bhattacharya_25150061
CD28	0	0	0	0	0	0	0	0	0	0	0	0	0	0	0	1.49302	0	0	0	0	0	0	0	0	0	0	0	0	0	0	0	0	1.41411	1.41154	1.41332	0	2.90713	SCRNASEQ: Hurskainen_33692365_endothelial, RNASEQ: Bhattacharya_25150061
CREG2	0	0	0	0	0	0	0	0	0	0	0	0	0	0	0	0	0	0	0	0	0	0	0	1.49201	0	0	0	0	0	0	0	0	0	1.41285	1.41486	0	2.90687	SCRNASEQ: Hurskainen_33692365_stroma, RNASEQ: Coarfa_28818871_male_up_day21
SLC11A1	0	0	0	0	0	0	0	0	0	0	0	0	0	0	0	1.49302	0	0	0	0	0	0	0	0	0	0	0	0	0	0	0	0	1.41347	1.41085	1.41252	0	2.90648	SCRNASEQ: Hurskainen_33692365_endothelial, RNASEQ: Bhattacharya_25150061
PLCD4	0	0	0	0	0	0	0	0	0	0	0	0	0	0	0	1.49302	0	0	0	0	0	0	0	0	0	0	0	0	0	0	0	0	1.4134	1.41079	1.41245	0	2.90642	SCRNASEQ: Hurskainen_33692365_endothelial, RNASEQ: Bhattacharya_25150061
FAM124B	0	0	0	0	0	0	0	0	0	0	0	0	0	0	0	1.49302	0	0	0	0	0	0	0	0	0	0	0	0	1.44112	0	0	0	1.41277	1.41019	1.41176	0	2.90579	SCRNASEQ: Hurskainen_33692365_endothelial, RNASEQ: Bhattacharya_25150061
ADAMTS10	0	0	0	0	0	0	0	0	0	0	0	0	0	0	1.44462	0	0	0	0	0	0	0	0	0	0	0	0	0	1.46303	0	0	0	0	0	0	1.44248	2.90551	SCRNASEQ: Scaffa_34417156_ranked, RNASEQ: Hirani_37876024
TBX4	0	0	0	0	0	0	0	0	0	0	0	0	0	1.44291	0	0	0	0	0	0	0	0	0	0	0	0	0	0	1.46176	0	0	0	0	0	0	1.44363	2.90539	SCRNASEQ: Scaffa_34417156_ranked, RNASEQ: Hirani_37876024
CKMT1A	0	0	0	0	0	0	0	0	0	0	0	0	0	0	0	0	0	0	0	0	0	0	0	0	0	0	0	0	1.50899	0	0	0	1.39609	1.39385	1.3924	0	2.90508	SCRNASEQ: Hurskainen_33692365_endothelial, RNASEQ: Hirani_37876024
TMPO	0	0	0	0	0	0	0	0	0	0	0	0	0	1.45411	0	0	0	0	0	0	0	0	0	0	0	0	0	0	0	0	0	0	0	0	0	1.4497	2.90381	SCRNASEQ: Scaffa_34417156_ranked, RNASEQ: Al_mudares_37368978_female
MEX3B	0	0	0	0	0	0	0	0	0	0	0	0	0	0	0	0	0	0	0	0	0	0	0	0	0	0	0	0	1.46068	0	0	0	0	0	0	1.443	2.90368	SCRNASEQ: Scaffa_34417156_ranked, RNASEQ: Hirani_37876024
HSP90AA1	0	0	0	0	0	0	0	0	0	0	0	0	0	1.45302	0	0	0	0	0	0	0	0	0	0	0	0	0	0	1.43538	0	0	0	0	0	0	1.45056	2.90358	SCRNASEQ: Scaffa_34417156_ranked, RNASEQ: Al_mudares_37368978_female
SIRPA	0	0	0	0	0	0	0	0	0	0	0	0	0	0	0	0	0	0	0	0	0	0	0	0	0	1.50841	0	0	0	0	0	0	1.39504	1.39278	1.39118	0	2.90344	SCRNASEQ: Hurskainen_33692365_endothelial, RNASEQ: Dong_36157523
CDH20	0	0	0	0	0	0	0	0	0	0	0	0	0	0	0	0	0	0	0	0	0	0	0	1.49201	0	0	0	0	0	0	0	0	1.41135	0	1.41011	0	2.90336	SCRNASEQ: Hurskainen_33692365_endothelial, RNASEQ: Coarfa_28818871_male_up_day21
SOX13	0	0	0	0	0	0	0	0	0	0	0	0	0	0	0	1.49302	0	0	0	0	0	0	0	0	0	0	0	0	1.4511	0	0	0	1.41015	1.40752	1.40869	0	2.90317	SCRNASEQ: Hurskainen_33692365_endothelial, RNASEQ: Bhattacharya_25150061
C1QTNF2	0	0	0	0	0	0	0	0	0	0	0	0	0	0	0	0	0	0	0	0	0	0	0	0	0	0	0	0	0	0	0	1.46301	0	0	0	1.44007	2.90309	SCRNASEQ: Scaffa_34417156_ranked, RNASEQ: Rao_37310763_ranked
HMOX1	0	0	0	0	0	0	0	0	0	0	0	0	0	0	0	0	0	0	0	0	0	0	0	0	0	0	0	0	1.45534	0	0	0	0	0	0	1.44753	2.90288	SCRNASEQ: Scaffa_34417156_ranked, RNASEQ: Hirani_37876024
TAOK2	0	0	0	0	0	0	0	0	0	0	0	0	0	0	1.44448	0	1.4545	0	0	0	0	0	0	0	0	0	0	0	1.42774	0	0	0	0	0	0	1.44837	2.90287	RNASEQ: Cheng_31961470, SCRNASEQ: Scaffa_34417156_ranked
LRRN4	0	0	0	0	0	0	0	0	0	0	0	0	0	0	0	0	0	0	0	0	0	0	0	0	0	1.50841	0	0	0	0	0	1.36457	1.39442	1.3922	1.39049	0	2.90283	SCRNASEQ: Hurskainen_33692365_endothelial, RNASEQ: Dong_36157523
ATF5	0	0	0	0	0	0	0	0	0	0	0	0	0	0	0	0	0	0	0	0	0	0	0	0	0	0	0	0	1.45732	0	0	0	0	0	0	1.44525	2.90257	SCRNASEQ: Scaffa_34417156_ranked, RNASEQ: Hirani_37876024
SDC2	0	0	0	0	0	0	0	0	0	0	0	0	0	0	0	0	0	0	0	0	0	0	0	0	0	0	0	0	1.45845	0	0	0	0	0	0	1.44397	2.90243	SCRNASEQ: Scaffa_34417156_ranked, RNASEQ: Hirani_37876024
NMNAT2	0	0	0	0	0	0	0	0	0	0	0	0	0	0	0	1.49302	0	0	0	0	0	0	0	0	0	0	0	0	1.47756	0	0	1.41454	1.40906	1.40644	1.40741	0	2.90208	SCRNASEQ: Hurskainen_33692365_endothelial, RNASEQ: Bhattacharya_25150061
SERPINH1	0	0	0	0	0	0	0	0	0	0	0	0	0	1.45126	0	0	0	0	0	0	0	0	0	0	0	0	0	0	0	0	0	0	0	0	0	1.45069	2.90194	SCRNASEQ: Scaffa_34417156_ranked, RNASEQ: Al_mudares_37368978_female
NREP	0	0	0	0	0	0	0	0	0	0	0	0	0	0	1.44394	0	0	0	0	0	0	0	0	0	0	0	0	0	1.44841	0	0	0	0	0	0	1.45326	2.90167	SCRNASEQ: Scaffa_34417156_ranked, RNASEQ: Hirani_37876024
CALCRL	0	0	0	0	0	0	0	0	0	0	0	0	0	0	0	1.50207	0	0	0	0	0	0	0	0	0	0	0	0	1.4464	0	0	0	1.39913	1.3968	1.39599	0	2.9012	SCRNASEQ: Hurskainen_33692365_endothelial, RNASEQ: Bhattacharya_25150061
CXCL14	0	0	0	0	0	0	0	0	0	0	0	0	0	0	0	0	0	0	0	0	0	0	0	0	0	0	0	0	0	0	0	1.45352	0	0	0	1.44715	2.90067	SCRNASEQ: Scaffa_34417156_ranked, RNASEQ: Rao_37310763_ranked
C11orf96	0	0	0	0	0	0	0	0	0	0	0	0	0	0	0	0	0	0	0	0	0	0	0	0	0	0	0	0	1.45032	0	0	0	1.39809	1.39575	1.3947	1.45034	2.90065	SCRNASEQ: Scaffa_34417156_ranked, RNASEQ: Hirani_37876024
RGS8	0	0	0	0	0	0	0	0	0	0	0	0	0	0	0	1.49302	0	0	0	0	0	0	0	0	0	0	0	0	1.42262	0	0	0	0	0	1.40732	0	2.90034	RNASEQ: Bhattacharya_25150061, SCRNASEQ: Hurskainen_33692365_stroma
ADSS1	0	0	0	0	0	0	0	0	0	0	0	0	0	0	0	1.49302	0	0	0	0	0	0	0	0	0	0	0	0	1.43407	0	0	0	1.40667	1.40415	1.40456	0	2.89968	SCRNASEQ: Hurskainen_33692365_endothelial, RNASEQ: Bhattacharya_25150061
OBSL1	0	0	0	0	0	0	0	0	0	0	0	0	0	0	0	0	0	0	0	0	0	0	0	0	0	0	0	0	1.48612	0	0	1.45852	1.41299	1.4104	1.412	0	2.89911	SCRNASEQ: Hurskainen_33692365_endothelial, RNASEQ: Hirani_37876024
ATF3	0	0	0	0	0	0	0	0	0	0	0	0	0	0	0	1.49302	0	0	0	0	0	0	0	0	0	0	0	0	1.44263	0	0	0	1.40569	1.40319	1.40344	0	2.89871	SCRNASEQ: Hurskainen_33692365_endothelial, RNASEQ: Bhattacharya_25150061
LAMB3	0	0	0	0	0	0	0	0	0	0	0	0	0	0	0	1.49302	0	0	0	0	0	0	0	0	0	0	0	0	0	0	0	0	1.40543	1.40294	1.40315	0	2.89845	SCRNASEQ: Hurskainen_33692365_endothelial, RNASEQ: Bhattacharya_25150061
BEND7	0	0	0	0	0	0	0	0	0	0	0	0	0	0	0	1.49302	0	0	0	0	0	0	0	0	0	0	0	0	1.43843	0	0	0	1.40517	1.40267	1.40283	0	2.89818	SCRNASEQ: Hurskainen_33692365_endothelial, RNASEQ: Bhattacharya_25150061
MEX3A	0	0	0	0	0	0	0	0	0	0	0	0	0	0	0	0	0	0	0	0	0	0	0	0	0	0	0	0	1.45439	0	0	1.36175	0	0	0	1.44361	2.898	SCRNASEQ: Scaffa_34417156_ranked, RNASEQ: Hirani_37876024
CACYBP	0	0	0	0	0	0	0	0	0	0	0	0	0	1.45282	1.44326	0	0	0	0	0	0	0	0	0	0	0	0	0	0	0	0	0	1.40855	1.40596	1.40679	1.44514	2.89795	SCRNASEQ: Scaffa_34417156_ranked, RNASEQ: Al_mudares_37368978_female
MAGED2	0	0	0	0	0	0	0	0	0	0	0	0	0	0	0	0	0	0	0	0	0	0	0	0	0	0	0	0	1.45117	0	0	0	0	0	0	1.44672	2.89789	SCRNASEQ: Scaffa_34417156_ranked, RNASEQ: Hirani_37876024
RPS16	0	0	0	0	0	0	0	0	0	0	0	0	0	1.44734	0	0	0	0	0	0	0	0	0	0	0	0	0	0	0	0	0	0	0	0	0	1.45028	2.89761	SCRNASEQ: Scaffa_34417156_ranked, RNASEQ: Al_mudares_37368978_female
G0S2	0	0	0	0	0	0	0	0	0	0	0	0	0	0	0	0	0	0	0	0	0	0	0	0	0	0	0	0	1.45332	0	0	0	1.4054	1.40291	1.40312	1.44413	2.89745	SCRNASEQ: Scaffa_34417156_ranked, RNASEQ: Hirani_37876024
HSPD1	0	0	0	0	0	0	0	0	0	0	0	0	0	1.45178	1.44357	0	0	0	0	0	0	0	0	0	0	0	0	0	1.4298	0	0	0	1.41468	1.4121	1.41399	1.44554	2.89732	SCRNASEQ: Scaffa_34417156_ranked, RNASEQ: Al_mudares_37368978_female
SLC25A3	0	0	0	0	0	0	0	0	0	0	0	0	0	1.44744	1.44268	0	0	0	0	0	0	0	0	0	0	0	0	0	0	0	0	0	0	0	0	1.44955	2.89699	SCRNASEQ: Scaffa_34417156_ranked, RNASEQ: Al_mudares_37368978_female
RSPO4	0	0	0	0	0	0	0	0	0	0	0	0	0	0	0	0	0	0	0	0	0	0	0	0	0	0	0	0	1.50337	0	0	0	1.39346	1.39125	1.38933	0	2.89683	SCRNASEQ: Hurskainen_33692365_endothelial, RNASEQ: Hirani_37876024
GTF2A2	0	0	0	0	0	0	0	0	0	0	0	0	0	1.4535	0	0	0	0	0	0	0	0	0	0	0	0	0	0	0	0	0	0	0	0	0	1.44324	2.89673	SCRNASEQ: Scaffa_34417156_ranked, RNASEQ: Al_mudares_37368978_female
UCP2	0	0	0	0	0	0	0	0	0	0	0	0	0	1.44654	0	0	0	0	0	0	0	0	0	0	0	0	0	0	0	0	0	0	0	0	0	1.45017	2.89671	SCRNASEQ: Scaffa_34417156_ranked, RNASEQ: Al_mudares_37368978_female
Cbr2	0	0	0	0	0	0	0	0	0	0	0	0	0	1.44868	1.44356	0	0	0	0	0	0	0	0	0	0	0	0	0	0	0	0	0	0	0	0	1.44743	2.89611	SCRNASEQ: Scaffa_34417156_ranked, RNASEQ: Al_mudares_37368978_female
TXNIP	0	0	0	0	0	0	0	0	0	0	0	0	0	1.44759	1.444	0	0	0	0	0	0	0	0	0	0	0	0	0	0	0	0	0	0	0	0	1.44827	2.89585	SCRNASEQ: Scaffa_34417156_ranked, RNASEQ: Al_mudares_37368978_female
SFPQ	0	0	0	0	0	0	0	0	0	0	0	0	0	1.44594	1.44352	0	0	0	0	0	0	0	0	0	0	0	0	0	0	0	0	0	0	0	0	1.44989	2.89584	SCRNASEQ: Scaffa_34417156_ranked, RNASEQ: Al_mudares_37368978_female
TRABD2B	0	0	0	0	0	0	0	0	0	0	0	0	0	1.45017	0	0	0	0	0	0	0	0	0	0	0	0	0	0	0	0	0	1.36258	0	0	0	1.44537	2.89555	SCRNASEQ: Scaffa_34417156_ranked, RNASEQ: Al_mudares_37368978_female
ASS1	0	0	0	0	0	0	0	0	0	0	0	0	0	0	0	1.49302	0	0	0	0	0	0	0	0	0	0	0	0	1.46231	0	0	1.36193	1.40229	1.39985	1.39953	0	2.8953	SCRNASEQ: Hurskainen_33692365_endothelial, RNASEQ: Bhattacharya_25150061
KLHL23	0	0	0	0	0	0	0	0	0	0	0	0	0	0	0	0	0	0	0	0	0	0	0	0	0	0	0	0	1.45132	0	0	0	1.40006	1.39769	1.39699	1.44391	2.89523	SCRNASEQ: Scaffa_34417156_ranked, RNASEQ: Hirani_37876024
RPSA	0	0	0	0	0	0	0	0	0	0	0	0	0	0	1.44338	0	0	0	0	0	0	0	0	0	0	0	0	0	0	0	0	0	0	0	0	1.45166	2.89504	SCRNASEQ: Scaffa_34417156_ranked, RNASEQ: Al_mudares_37368978_male
TP53I11	0	0	0	0	0	0	0	0	0	0	0	0	0	0	0	0	0	0	0	0	0	0	0	0	0	0	0	0	1.44625	0	0	1.37288	1.39816	1.39582	1.39479	1.44878	2.89503	SCRNASEQ: Scaffa_34417156_ranked, RNASEQ: Hirani_37876024
MYH9	0	0	0	0	0	0	0	0	0	0	0	0	0	0	1.44464	0	0	0	0	0	0	0	0	0	0	0	0	0	0	0	0	0	0	0	0	1.45038	2.89502	SCRNASEQ: Scaffa_34417156_ranked, RNASEQ: Al_mudares_37368978_male
NOP58	0	0	0	0	0	0	0	0	0	0	0	0	0	0	0	0	1.45374	0	0	0	0	0	0	0	0	0	0	0	1.44254	0	0	0	1.41424	1.41166	1.41347	1.44123	2.89497	RNASEQ: Cheng_31961470, SCRNASEQ: Scaffa_34417156_ranked
TCIM	0	0	0	0	0	0	0	0	0	0	0	0	0	0	0	0	0	0	0	0	0	0	0	0	0	0	0	0	1.44441	0	0	1.38732	0	0	0	1.45029	2.8947	SCRNASEQ: Scaffa_34417156_ranked, RNASEQ: Hirani_37876024
IGFBP3	0	0	0	0	0	0	0	0	0	0	0	0	0	1.44749	0	0	0	0	0	0	0	0	0	0	0	0	0	0	0	0	0	0	0	0	0	1.44706	2.89455	SCRNASEQ: Scaffa_34417156_ranked, RNASEQ: Al_mudares_37368978_female
RHOBTB3	0	0	0	0	0	0	0	0	0	0	0	0	0	0	0	0	0	0	0	0	0	0	0	0	0	0	0	0	1.44939	0	0	0	0	0	0	1.44505	2.89444	SCRNASEQ: Scaffa_34417156_ranked, RNASEQ: Hirani_37876024
LXN	0	0	0	0	0	0	0	0	0	0	0	0	0	0	1.44456	0	0	0	0	0	0	0	0	0	0	0	0	0	1.43724	0	0	0	0	0	0	1.44982	2.89438	SCRNASEQ: Scaffa_34417156_ranked, RNASEQ: Al_mudares_37368978_male
PTGS1	0	0	0	0	0	0	0	0	0	0	0	0	0	0	0	1.49302	0	0	0	0	0	0	0	0	0	0	0	0	1.46004	0	0	0	1.40135	1.39894	1.39847	0	2.89437	SCRNASEQ: Hurskainen_33692365_endothelial, RNASEQ: Bhattacharya_25150061
MPZL1	0	0	0	0	0	0	0	0	0	0	0	0	0	1.44386	0	0	0	0	0	0	0	0	0	0	0	0	0	0	1.45059	0	0	0	1.40795	1.40537	1.40608	1.44373	2.89433	SCRNASEQ: Scaffa_34417156_ranked, RNASEQ: Hirani_37876024
EIF4H	0	0	0	0	0	0	0	0	0	0	0	0	0	1.44957	0	0	0	0	0	0	0	0	0	0	0	0	0	0	0	0	0	0	0	0	0	1.44465	2.89422	SCRNASEQ: Scaffa_34417156_ranked, RNASEQ: Al_mudares_37368978_female
COX7B	0	0	0	0	0	0	0	0	0	0	0	0	0	0	1.44358	0	0	0	0	0	0	0	0	0	0	0	0	0	0	0	0	0	0	0	0	1.45061	2.89419	SCRNASEQ: Scaffa_34417156_ranked, RNASEQ: Al_mudares_37368978_male
MGMT	1.40112	0	0	0	0	0	0	0	0	0	0	0	0	0	0	1.49302	0	0	0	0	0	0	0	0	0	0	0	0	1.49214	0	0	0	0	0	0	0	2.89414	RNASEQ: Bhattacharya_25150061, GWAS: Nichols_24571919
HNRNPF	0	0	0	0	0	0	0	0	0	0	0	0	0	0	1.4444	0	0	0	0	0	0	0	0	0	0	0	0	0	0	0	0	0	0	0	0	1.44965	2.89405	SCRNASEQ: Scaffa_34417156_ranked, RNASEQ: Al_mudares_37368978_male
RPL10	0	0	0	0	0	0	0	0	0	0	0	0	0	0	1.44336	0	0	0	0	0	0	0	0	0	0	0	0	0	0	0	0	0	0	0	0	1.45063	2.89398	SCRNASEQ: Scaffa_34417156_ranked, RNASEQ: Al_mudares_37368978_male
ARPC2	0	0	0	0	0	0	0	0	0	0	0	0	0	0	1.44346	0	0	0	0	0	0	0	0	0	0	0	0	0	0	0	0	0	1.41354	1.41093	1.41261	1.45042	2.89388	SCRNASEQ: Scaffa_34417156_ranked, RNASEQ: Al_mudares_37368978_male
Acot1	0	0	0	0	0	0	0	0	0	0	0	0	0	0	1.44421	0	0	0	0	0	0	0	0	0	0	0	0	0	0	0	0	0	0	0	0	1.44939	2.89359	SCRNASEQ: Scaffa_34417156_ranked, RNASEQ: Al_mudares_37368978_male
S100A16	0	0	0	0	0	0	0	0	0	0	0	0	0	0	1.44386	0	0	0	0	0	0	0	0	0	0	0	0	0	1.43496	0	0	0	0	0	0	1.44964	2.8935	SCRNASEQ: Scaffa_34417156_ranked, RNASEQ: Al_mudares_37368978_male
SIPA1	0	0	0	0	0	0	0	0	0	0	0	0	0	1.44495	0	0	0	0	0	0	0	0	0	0	0	0	0	0	1.43754	0	0	0	0	0	0	1.44855	2.8935	SCRNASEQ: Scaffa_34417156_ranked, RNASEQ: Al_mudares_37368978_female
SLC43A3	0	0	0	0	0	0	0	0	0	0	0	0	0	1.4448	0	0	0	0	0	0	0	0	0	0	0	0	0	0	1.44374	0	1.37591	0	1.39893	1.39661	1.39576	1.4485	2.8933	SCRNASEQ: Scaffa_34417156_ranked, RNASEQ: Al_mudares_37368978_female
PTMS	0	0	0	0	0	0	0	0	0	0	0	0	0	0	0	0	0	0	0	0	0	0	0	0	0	0	0	0	1.43099	0	0	1.36482	0	0	0	1.46225	2.89323	SCRNASEQ: Scaffa_34417156_ranked, RNASEQ: Hirani_37876024
NOSTRIN	0	0	0	0	0	0	0	0	0	0	0	0	0	0	0	1.49302	0	0	0	0	0	0	0	0	0	0	0	0	1.42282	0	0	1.37275	1.40021	1.39782	1.39715	0	2.89322	SCRNASEQ: Hurskainen_33692365_endothelial, RNASEQ: Bhattacharya_25150061
GNB1	0	0	0	0	0	0	0	0	0	0	0	0	0	0	1.44349	0	0	0	0	0	0	0	0	0	0	0	0	0	0	0	0	0	0	0	0	1.44973	2.89322	SCRNASEQ: Scaffa_34417156_ranked, RNASEQ: Al_mudares_37368978_male
MFAP4	0	0	0	0	0	0	0	0	0	0	0	0	0	0	1.44429	0	0	0	0	0	0	0	0	0	0	0	0	0	1.42845	0	0	0	0	0	0	1.44883	2.89312	SCRNASEQ: Scaffa_34417156_ranked, RNASEQ: Al_mudares_37368978_male
LYZ	0	0	0	0	0	0	0	0	0	0	0	0	0	0	1.44367	0	0	0	0	0	0	0	0	0	0	0	0	0	1.43117	0	0	0	0	0	0	1.44943	2.89311	SCRNASEQ: Scaffa_34417156_ranked, RNASEQ: Al_mudares_37368978_male
TPM1	0	0	0	0	0	0	0	0	0	0	0	0	0	1.44435	1.44255	0	0	0	0	0	0	0	0	0	0	0	0	0	1.43077	0	0	0	0	0	0	1.44874	2.89309	SCRNASEQ: Scaffa_34417156_ranked, RNASEQ: Al_mudares_37368978_female
SH3GLB1	0	0	0	0	0	0	0	0	0	0	0	0	0	0	1.44265	0	0	0	0	0	0	0	0	0	0	0	0	0	1.42471	0	0	1.36192	0	0	0	1.45044	2.89309	SCRNASEQ: Scaffa_34417156_ranked, RNASEQ: Al_mudares_37368978_male
SCGB1A1	0	0	0	0	0	0	0	0	0	0	0	0	0	0	1.44366	0	0	0	0	0	0	0	0	0	0	0	0	0	0	0	0	0	0	0	0	1.44942	2.89308	SCRNASEQ: Scaffa_34417156_ranked, RNASEQ: Al_mudares_37368978_male
Aox3	0	0	0	0	0	0	0	0	0	0	0	0	0	0	1.44368	0	0	0	0	0	0	0	0	0	0	0	0	0	0	0	0	0	1.4145	1.41192	1.41379	1.44927	2.89295	SCRNASEQ: Scaffa_34417156_ranked, RNASEQ: Al_mudares_37368978_male
TRIL	0	0	0	0	0	0	0	0	0	0	0	0	0	0	0	0	0	0	0	0	0	0	0	0	0	0	0	0	1.44659	0	0	1.36211	0	0	0	1.44631	2.89291	SCRNASEQ: Scaffa_34417156_ranked, RNASEQ: Hirani_37876024
TPT1	0	0	0	0	0	0	0	0	0	0	0	0	0	0	1.44316	0	0	0	0	0	0	0	0	0	0	0	0	0	0	0	0	0	0	0	0	1.44963	2.8928	SCRNASEQ: Scaffa_34417156_ranked, RNASEQ: Al_mudares_37368978_male
PHF12	0	0	0	0	0	0	0	0	0	0	0	0	0	1.44401	0	0	0	0	0	0	0	0	0	0	0	0	0	0	1.43086	0	0	1.36658	0	0	0	1.44869	2.8927	SCRNASEQ: Scaffa_34417156_ranked, RNASEQ: Al_mudares_37368978_female
AHNAK	0	0	0	0	0	0	0	0	0	0	0	0	0	0	1.44466	0	0	0	0	0	0	0	0	0	0	0	0	0	0	0	0	0	0	0	0	1.44804	2.89269	SCRNASEQ: Scaffa_34417156_ranked, RNASEQ: Al_mudares_37368978_male
COL27A1	0	0	0	0	0	0	0	0	0	0	0	0	0	1.44873	0	0	0	0	0	0	0	0	0	0	0	0	0	0	0	0	0	0	0	0	0	1.44393	2.89266	SCRNASEQ: Scaffa_34417156_ranked, RNASEQ: Al_mudares_37368978_female
BGN	0	0	0	0	0	0	0	0	0	0	0	0	0	0	1.44439	0	0	0	0	0	0	0	0	0	0	0	0	0	0	0	0	0	0	0	0	1.44827	2.89266	SCRNASEQ: Scaffa_34417156_ranked, RNASEQ: Al_mudares_37368978_male
RUNX1	0	0	0	0	0	0	0	0	0	0	0	0	0	0	0	0	0	0	0	0	0	0	0	0	0	0	0	0	1.45216	0	0	0	0	0	0	1.43995	2.89212	SCRNASEQ: Scaffa_34417156_ranked, RNASEQ: Hirani_37876024
UNC93B1	0	0	0	0	0	0	0	0	0	0	0	0	0	0	1.44364	0	0	0	0	0	0	0	0	0	0	0	0	0	0	0	0	0	0	0	0	1.44842	2.89207	SCRNASEQ: Scaffa_34417156_ranked, RNASEQ: Al_mudares_37368978_male
STK17B	0	0	0	0	0	0	0	0	0	0	0	0	0	1.44246	1.44344	0	0	0	0	0	0	0	0	0	0	0	0	0	0	0	0	0	1.41478	1.4122	1.4141	1.4486	2.89204	SCRNASEQ: Scaffa_34417156_ranked, RNASEQ: Al_mudares_37368978_male
GSPT1	0	0	0	0	0	0	0	0	0	0	0	0	0	1.44928	0	0	0	0	0	0	0	0	0	0	0	0	0	0	0	0	0	0	0	0	0	1.44275	2.89202	SCRNASEQ: Scaffa_34417156_ranked, RNASEQ: Al_mudares_37368978_female
DACH1	0	0	0	0	0	0	0	0	0	0	0	0	0	1.45043	0	0	0	0	0	0	0	0	0	0	0	0	0	0	0	0	0	0	0	0	0	1.44157	2.892	SCRNASEQ: Scaffa_34417156_ranked, RNASEQ: Al_mudares_37368978_female
STMN1	0	0	0	0	0	0	0	0	0	0	0	0	0	0	0	0	0	0	0	0	0	0	0	0	0	0	0	0	1.44221	0	0	0	0	0	0	1.44977	2.89198	SCRNASEQ: Scaffa_34417156_ranked, RNASEQ: Hirani_37876024
TBX2	0	0	0	0	0	0	0	0	0	0	0	0	0	0	0	0	0	0	0	0	0	0	0	0	0	0	0	0	1.44865	0	0	0	0	0	0	1.44317	2.89182	SCRNASEQ: Scaffa_34417156_ranked, RNASEQ: Hirani_37876024
DIAPH1	0	0	0	0	0	0	0	0	0	0	0	0	0	0	1.44404	0	0	0	0	0	0	0	0	0	0	0	0	0	0	0	0	0	0	0	0	1.44778	2.89182	SCRNASEQ: Scaffa_34417156_ranked, RNASEQ: Al_mudares_37368978_male
FOXO1	0	0	0	0	0	0	0	0	0	0	0	0	0	0	0	0	0	0	0	0	0	0	0	0	0	0	0	0	1.44273	0	0	0	0	0	0	1.44881	2.89154	SCRNASEQ: Scaffa_34417156_ranked, RNASEQ: Hirani_37876024
ITGA4	0	0	0	0	0	0	0	0	0	0	0	0	0	0	1.44355	0	0	0	0	0	0	0	0	0	0	0	0	0	0	0	0	0	1.39931	1.39696	1.39618	1.44775	2.8913	SCRNASEQ: Scaffa_34417156_ranked, RNASEQ: Al_mudares_37368978_male
MPEG1	0	0	0	0	0	0	0	0	0	0	0	0	0	0	1.44351	0	0	0	0	0	0	0	0	0	0	0	0	0	0	0	0	0	0	0	0	1.44775	2.89126	SCRNASEQ: Scaffa_34417156_ranked, RNASEQ: Al_mudares_37368978_male
CAT	0	0	0	0	0	0	0	0	0	0	0	0	0	0	1.44374	0	0	0	0	0	0	0	0	0	0	0	0	0	0	0	0	0	1.39781	1.39548	1.39439	1.44742	2.89116	SCRNASEQ: Scaffa_34417156_ranked, RNASEQ: Al_mudares_37368978_male
ADAMTS17	0	0	0	0	0	0	0	0	0	0	0	0	0	0	1.44436	0	0	0	0	0	0	0	0	0	0	0	0	0	0	0	0	0	0	0	0	1.4467	2.89107	SCRNASEQ: Scaffa_34417156_ranked, RNASEQ: Al_mudares_37368978_male
ALDOA	0	0	0	0	0	0	0	0	0	0	0	0	0	0	0	0	0	0	0	0	0	0	0	0	0	0	0	0	1.44315	0	0	0	0	0	0	1.44781	2.89096	SCRNASEQ: Scaffa_34417156_ranked, RNASEQ: Hirani_37876024
FLNA	0	0	0	0	0	0	0	0	0	0	0	0	0	0	1.44251	0	0	0	0	0	0	0	0	0	0	0	0	0	0	0	0	0	0	0	0	1.44844	2.89096	SCRNASEQ: Scaffa_34417156_ranked, RNASEQ: Al_mudares_37368978_male
HEG1	0	0	0	0	0	0	0	0	0	0	0	0	0	0	1.44435	0	0	0	0	0	0	0	0	0	0	0	0	0	0	0	0	0	0	0	0	1.44651	2.89086	SCRNASEQ: Scaffa_34417156_ranked, RNASEQ: Al_mudares_37368978_male
FCER1G	0	0	0	0	0	0	0	0	0	0	0	0	0	0	1.44294	0	0	0	0	0	0	0	0	0	0	0	0	0	0	0	0	1.38061	1.40743	1.40486	1.40547	1.4479	2.89084	SCRNASEQ: Scaffa_34417156_ranked, RNASEQ: Al_mudares_37368978_male
CYP4B1	0	0	0	0	0	0	0	0	0	0	0	0	0	0	1.44338	0	0	0	0	0	0	0	0	0	0	0	0	0	1.42162	0	0	0	0	0	0	1.44744	2.89082	SCRNASEQ: Scaffa_34417156_ranked, RNASEQ: Al_mudares_37368978_male
C7	0	0	0	0	0	0	0	0	0	0	0	0	0	0	1.44381	0	0	0	0	0	0	0	0	0	0	0	0	0	0	0	0	0	0	0	0	1.447	2.8908	SCRNASEQ: Scaffa_34417156_ranked, RNASEQ: Al_mudares_37368978_male
PSMA3	0	0	0	0	0	0	0	0	0	0	0	0	0	0	1.44341	0	0	0	0	0	0	0	0	0	0	0	0	0	0	0	0	0	0	0	0	1.44733	2.89074	SCRNASEQ: Scaffa_34417156_ranked, RNASEQ: Al_mudares_37368978_male
NCOR1	0	0	0	0	0	0	0	0	0	0	0	0	0	0	1.44479	0	0	0	0	0	0	0	0	0	0	0	0	0	0	0	0	0	0	0	0	1.44591	2.89071	SCRNASEQ: Scaffa_34417156_ranked, RNASEQ: Al_mudares_37368978_male
ACOT7	0	0	0	0	0	0	0	0	0	0	0	0	0	1.44207	1.44332	0	0	0	0	0	0	0	0	0	0	0	0	0	0	0	0	0	0	0	0	1.44736	2.89068	SCRNASEQ: Scaffa_34417156_ranked, RNASEQ: Al_mudares_37368978_male
OAZ2	0	0	0	0	0	0	0	0	0	0	0	0	0	0	0	0	0	0	0	0	0	0	0	0	0	0	0	0	1.44602	0	0	0	0	0	0	1.44466	2.89068	SCRNASEQ: Scaffa_34417156_ranked, RNASEQ: Hirani_37876024
MTNR1B	0	0	0	0	0	0	0	0	0	0	0	0	0	1.4449	0	0	0	0	0	0	0	0	0	0	0	0	0	0	0	0	0	0	0	0	0	1.44576	2.89066	SCRNASEQ: Scaffa_34417156_ranked, RNASEQ: Al_mudares_37368978_female
FCGRT	0	0	0	0	0	0	0	0	0	0	0	0	0	0	0	0	0	0	0	0	0	0	0	0	0	0	0	0	1.44859	0	0	0	0	0	0	1.44199	2.89058	SCRNASEQ: Scaffa_34417156_ranked, RNASEQ: Hirani_37876024
PSAP	0	0	0	0	0	0	0	0	0	0	0	0	0	0	1.44322	0	0	0	0	0	0	0	0	0	0	0	0	0	0	0	0	0	0	0	0	1.44735	2.89058	SCRNASEQ: Scaffa_34417156_ranked, RNASEQ: Al_mudares_37368978_male
PILRA	0	0	0	0	0	0	0	0	0	0	0	0	0	0	1.44284	0	0	0	0	0	0	0	0	0	0	0	0	0	0	0	0	0	0	0	0	1.44773	2.89057	SCRNASEQ: Scaffa_34417156_ranked, RNASEQ: Al_mudares_37368978_male
EIF4G1	0	0	0	0	0	0	0	0	0	0	0	0	0	0	1.44436	0	0	0	0	0	0	0	0	0	0	0	0	0	0	0	0	0	0	0	0	1.44613	2.89048	SCRNASEQ: Scaffa_34417156_ranked, RNASEQ: Al_mudares_37368978_male
GSTM5	0	0	0	0	0	0	0	0	0	0	0	0	0	0	1.44344	0	0	0	0	0	0	0	0	0	0	0	0	0	1.42621	0	0	0	0	0	0	1.44699	2.89043	SCRNASEQ: Scaffa_34417156_ranked, RNASEQ: Al_mudares_37368978_male
RCAN1	0	0	0	0	0	0	0	0	0	0	0	0	0	0	1.44396	0	0	0	0	0	0	0	0	0	0	0	0	0	0	0	0	0	0	0	0	1.4463	2.89026	SCRNASEQ: Scaffa_34417156_ranked, RNASEQ: Al_mudares_37368978_male
LAMA5	0	0	0	0	0	0	0	0	0	0	0	0	0	0	1.44386	0	0	0	0	0	0	0	0	0	0	0	0	0	0	0	0	1.36423	0	0	0	1.4464	2.89026	SCRNASEQ: Scaffa_34417156_ranked, RNASEQ: Al_mudares_37368978_male
CALR	0	0	0	0	0	0	0	0	0	0	0	0	0	1.4442	0	0	0	0	0	0	0	0	0	0	0	0	0	0	0	0	0	0	0	0	0	1.44603	2.89024	SCRNASEQ: Scaffa_34417156_ranked, RNASEQ: Al_mudares_37368978_female
CCN5	0	0	0	0	0	0	0	0	0	0	0	0	0	0	1.44301	0	0	0	0	0	0	0	0	0	0	0	0	0	0	0	0	1.37354	1.39172	1.38953	0	1.44716	2.89018	SCRNASEQ: Scaffa_34417156_ranked, RNASEQ: Al_mudares_37368978_male
CACNA1D	0	0	0	0	0	0	0	0	0	0	0	0	0	1.44376	1.44432	0	0	0	0	0	0	0	0	0	0	0	0	0	0	0	0	1.36441	0	0	0	1.44585	2.89017	SCRNASEQ: Scaffa_34417156_ranked, RNASEQ: Al_mudares_37368978_male
DBN1	0	0	0	0	0	0	0	0	0	0	0	0	0	0	1.44467	0	0	0	0	0	0	0	0	0	0	0	0	0	1.44128	0	0	0	0	0	0	1.4453	2.88997	SCRNASEQ: Scaffa_34417156_ranked, RNASEQ: Al_mudares_37368978_male
RAMP2	0	0	0	0	0	0	0	0	0	0	0	0	0	0	0	0	0	0	0	0	0	0	0	0	0	0	0	0	1.44042	0	0	0	0	0	0	1.44949	2.88991	SCRNASEQ: Scaffa_34417156_ranked, RNASEQ: Hirani_37876024
Ms4a4d	0	0	0	0	0	0	0	0	0	0	0	0	0	0	1.44296	0	0	0	0	0	0	0	0	0	0	0	0	0	0	0	0	0	0	0	0	1.4469	2.88986	SCRNASEQ: Scaffa_34417156_ranked, RNASEQ: Al_mudares_37368978_male
TMEM59	0	0	0	0	0	0	0	0	0	0	0	0	0	1.44584	0	0	0	0	0	0	0	0	0	0	0	0	0	0	0	0	0	0	0	0	0	1.444	2.88985	SCRNASEQ: Scaffa_34417156_ranked, RNASEQ: Al_mudares_37368978_female
ANP32A	0	0	0	0	0	0	0	0	0	0	0	0	0	0	0	0	0	0	0	0	0	0	0	0	0	0	0	0	1.44016	0	0	0	0	0	0	1.44957	2.88973	SCRNASEQ: Scaffa_34417156_ranked, RNASEQ: Hirani_37876024
DPEP1	0	0	0	0	0	0	0	0	0	0	0	0	0	1.44445	0	0	0	0	0	0	0	0	0	0	0	0	0	0	0	0	0	0	0	0	0	1.44512	2.88957	SCRNASEQ: Scaffa_34417156_ranked, RNASEQ: Al_mudares_37368978_female
DHX9	0	0	0	0	0	0	0	0	0	0	0	0	0	0	1.44472	0	0	0	0	0	0	0	0	0	0	0	0	0	0	0	0	0	1.40901	1.40639	1.40735	1.4448	2.88952	SCRNASEQ: Scaffa_34417156_ranked, RNASEQ: Al_mudares_37368978_male
CYB5A	0	0	0	0	0	0	0	0	0	0	0	0	0	0	1.44366	0	0	0	0	0	0	0	0	0	0	0	0	0	0	0	0	0	0	0	0	1.44584	2.8895	SCRNASEQ: Scaffa_34417156_ranked, RNASEQ: Al_mudares_37368978_male
THRA	0	0	0	0	0	0	0	0	0	0	0	0	0	0	0	0	0	0	0	0	0	0	0	0	0	0	0	0	1.44342	0	0	0	0	0	0	1.44607	2.8895	SCRNASEQ: Scaffa_34417156_ranked, RNASEQ: Hirani_37876024
Chil4	0	0	0	0	0	0	0	0	0	0	0	0	0	1.44356	0	0	0	0	0	0	0	0	0	0	0	0	0	0	0	0	0	0	0	0	0	1.4457	2.88926	SCRNASEQ: Scaffa_34417156_ranked, RNASEQ: Al_mudares_37368978_female
CD47	0	0	0	0	0	0	0	0	0	0	0	0	0	1.44351	0	0	0	0	0	0	0	0	0	0	0	0	0	0	0	0	0	0	0	0	0	1.44564	2.88915	SCRNASEQ: Scaffa_34417156_ranked, RNASEQ: Al_mudares_37368978_female
TIMP3	0	0	0	0	0	0	0	0	0	0	0	0	0	0	0	0	0	0	0	0	0	0	0	0	0	0	0	0	1.44188	0	0	0	0	0	0	1.44718	2.88907	SCRNASEQ: Scaffa_34417156_ranked, RNASEQ: Hirani_37876024
FKBP10	0	0	0	0	0	0	0	0	0	0	0	0	0	0	1.44446	0	0	0	0	0	0	0	0	0	0	0	0	0	0	0	0	0	0	0	0	1.44453	2.889	SCRNASEQ: Scaffa_34417156_ranked, RNASEQ: Al_mudares_37368978_male
STOX2	0	0	0	0	0	0	0	0	0	0	0	0	0	0	1.44388	0	0	0	0	0	0	0	0	0	0	0	0	0	1.43875	0	0	0	0	0	0	1.44506	2.88894	SCRNASEQ: Scaffa_34417156_ranked, RNASEQ: Al_mudares_37368978_male
GRHL1	0	0	0	0	0	0	0	0	0	0	0	0	0	0	1.4446	0	0	0	0	0	0	0	0	0	0	0	0	0	1.42399	0	0	0	0	0	0	1.44431	2.88891	SCRNASEQ: Scaffa_34417156_ranked, RNASEQ: Al_mudares_37368978_male
GFRA2	0	0	0	0	0	0	0	0	0	0	0	0	0	0	0	0	0	0	0	0	0	0	0	0	0	0	0	0	1.44422	0	0	0	0	0	0	1.44432	2.88853	SCRNASEQ: Scaffa_34417156_ranked, RNASEQ: Hirani_37876024
C1orf54	0	0	0	0	0	0	0	0	0	0	0	0	0	0	0	0	0	0	0	0	0	0	0	0	0	0	0	0	1.44773	0	0	0	0	0	0	1.44079	2.88852	SCRNASEQ: Scaffa_34417156_ranked, RNASEQ: Hirani_37876024
MBOAT2	0	0	0	0	0	0	0	0	0	0	0	0	0	0	1.4439	0	0	0	0	0	0	0	0	0	0	0	0	0	0	0	0	0	0	0	0	1.44462	2.88852	SCRNASEQ: Scaffa_34417156_ranked, RNASEQ: Al_mudares_37368978_male
BPTF	0	0	0	0	0	0	0	0	0	0	0	0	0	1.4453	0	0	0	0	0	0	0	0	0	0	0	0	0	0	0	0	0	0	0	0	0	1.44317	2.88846	SCRNASEQ: Scaffa_34417156_ranked, RNASEQ: Al_mudares_37368978_female
BAMBI	0	0	0	0	0	0	0	0	0	0	0	0	0	0	1.44365	0	0	0	0	0	0	0	0	0	0	0	0	0	0	0	0	0	0	0	0	1.44447	2.88812	SCRNASEQ: Scaffa_34417156_ranked, RNASEQ: Al_mudares_37368978_male
ILF3	0	0	0	0	0	0	0	0	0	0	0	0	0	1.44719	0	0	0	0	0	0	0	0	0	0	0	0	0	0	0	0	0	0	0	0	0	1.44075	2.88794	SCRNASEQ: Scaffa_34417156_ranked, RNASEQ: Al_mudares_37368978_female
ILK	0	0	0	0	0	0	0	0	0	0	0	0	0	1.44714	0	0	0	0	0	0	0	0	0	0	0	0	0	0	0	0	0	0	0	0	0	1.4408	2.88793	SCRNASEQ: Scaffa_34417156_ranked, RNASEQ: Al_mudares_37368978_female
CASP6	0	0	0	0	0	0	0	0	0	0	0	0	0	0	0	0	0	0	0	0	0	0	0	0	0	0	0	0	1.4473	0	0	0	0	0	0	1.44052	2.88783	SCRNASEQ: Scaffa_34417156_ranked, RNASEQ: Hirani_37876024
ADAM33	0	0	0	0	0	0	0	0	0	0	0	0	0	0	0	1.49302	0	0	0	0	0	0	0	0	0	0	0	0	1.44847	0	0	0	1.39475	1.3925	1.39085	0	2.88777	SCRNASEQ: Hurskainen_33692365_endothelial, RNASEQ: Bhattacharya_25150061
TGFBI	0	0	0	0	0	0	0	0	0	0	0	0	0	0	0	0	0	0	0	0	0	0	0	0	0	0	0	0	1.43934	0	0	0	0	0	0	1.44831	2.88765	SCRNASEQ: Scaffa_34417156_ranked, RNASEQ: Hirani_37876024
CTSV	0	0	0	0	0	0	0	0	0	0	0	0	0	1.44391	0	0	0	0	0	0	0	0	0	0	0	0	0	0	0	0	0	0	0	0	0	1.4436	2.88751	SCRNASEQ: Scaffa_34417156_ranked, RNASEQ: Al_mudares_37368978_female
PLCB1	0	0	0	0	0	0	0	0	0	0	0	0	0	0	0	1.49302	0	0	0	0	0	0	0	0	0	0	0	0	1.45554	0	0	0	1.39435	1.39213	1.39042	0	2.88737	SCRNASEQ: Hurskainen_33692365_endothelial, RNASEQ: Bhattacharya_25150061
P4HA3	0	0	0	0	0	0	0	0	0	0	0	0	0	0	0	0	0	0	0	0	0	0	0	0	0	0	0	0	1.44378	0	0	1.36197	0	0	0	1.44348	2.88726	SCRNASEQ: Scaffa_34417156_ranked, RNASEQ: Hirani_37876024
ZNF644	0	0	0	0	0	0	0	0	0	0	0	0	0	1.445	0	0	0	0	0	0	0	0	0	0	0	0	0	0	0	0	0	0	0	0	0	1.44223	2.88723	SCRNASEQ: Scaffa_34417156_ranked, RNASEQ: Al_mudares_37368978_female
HP	0	0	0	0	0	0	0	0	0	0	0	0	0	0	0	0	0	0	0	0	0	0	0	0	0	0	0	0	1.4398	0	0	0	0	0	0	1.44742	2.88722	SCRNASEQ: Scaffa_34417156_ranked, RNASEQ: Hirani_37876024
LTBP3	0	0	0	0	0	0	0	0	0	0	0	0	0	1.44162	1.4443	0	0	0	0	0	0	0	0	0	0	0	0	0	1.43392	0	0	0	0	0	0	1.44284	2.88715	SCRNASEQ: Scaffa_34417156_ranked, RNASEQ: Al_mudares_37368978_male
HMG20B	0	0	0	0	0	0	0	0	0	0	0	0	0	1.44599	0	0	0	0	0	0	0	0	0	0	0	0	0	0	0	0	0	0	0	0	0	1.44114	2.88714	SCRNASEQ: Scaffa_34417156_ranked, RNASEQ: Al_mudares_37368978_female
GIMAP1-GIMAP5	0	0	0	0	0	0	0	0	0	0	0	0	0	0	0	0	0	0	0	0	0	0	0	0	0	0	0	0	1.43807	0	0	0	0	0	0	1.44894	2.88701	SCRNASEQ: Scaffa_34417156_ranked, RNASEQ: Hirani_37876024
VEGFA	0	0	0	0	0	0	0	0	0	0	0	0	0	1.44674	0	0	0	0	0	0	0	0	0	0	0	0	0	0	0	0	0	1.3617	0	0	0	1.44024	2.88698	SCRNASEQ: Scaffa_34417156_ranked, RNASEQ: Al_mudares_37368978_female
ITGB6	0	0	0	0	0	0	0	0	0	0	0	0	0	0	0	0	0	0	0	0	0	0	0	0	0	0	0	0	1.48642	0	0	0	1.40051	1.3981	1.39751	0	2.88693	SCRNASEQ: Hurskainen_33692365_endothelial, RNASEQ: Hirani_37876024
PSMD8	0	0	0	0	0	0	0	0	0	0	0	0	0	0	0	0	0	0	0	0	0	0	0	0	0	0	0	0	1.43889	0	0	0	0	0	0	1.44802	2.88691	SCRNASEQ: Scaffa_34417156_ranked, RNASEQ: Hirani_37876024
SPTAN1	0	0	0	0	0	0	0	0	0	0	0	0	0	0	1.44455	0	0	0	0	0	0	0	0	0	0	0	0	0	0	0	0	0	1.40272	1.40027	1.40001	1.44229	2.88684	SCRNASEQ: Scaffa_34417156_ranked, RNASEQ: Al_mudares_37368978_male
THBD	0	0	0	0	0	0	0	0	0	0	0	0	0	0	0	1.49302	0	0	0	0	0	0	0	0	0	0	0	0	1.43485	0	0	1.36764	1.3938	1.39161	1.38976	0	2.88682	SCRNASEQ: Hurskainen_33692365_endothelial, RNASEQ: Bhattacharya_25150061
EVA1B	0	0	0	0	0	0	0	0	0	0	0	0	0	1.44212	0	0	0	0	0	0	0	0	0	0	0	0	0	0	0	0	0	0	0	0	0	1.44454	2.88666	SCRNASEQ: Scaffa_34417156_ranked, RNASEQ: Al_mudares_37368978_female
PHGR1	0	0	0	0	0	0	0	0	0	0	0	0	0	0	0	0	0	0	0	0	0	0	0	1.49201	0	0	0	0	0	0	0	0	0	1.39461	1.39327	0	2.88662	SCRNASEQ: Hurskainen_33692365_epithelial, RNASEQ: Coarfa_28818871_male_up_day21
IL36G	0	0	0	0	0	0	0	0	0	0	0	0	0	0	1.44267	0	0	0	0	0	0	0	0	0	0	0	0	0	0	0	0	1.48227	1.40423	1.40174	1.40175	0	2.8865	SCRNASEQ: Hurskainen_33692365_endothelial, RNASEQ: Rao_37310763_ranked
GOLGB1	0	0	0	0	0	0	0	0	0	0	0	0	0	0	1.44412	0	0	0	0	0	0	0	0	0	0	0	0	0	0	0	0	0	0	0	0	1.44225	2.88637	SCRNASEQ: Scaffa_34417156_ranked, RNASEQ: Al_mudares_37368978_male
ILF2	0	0	0	0	0	0	0	0	0	0	0	0	0	0	1.44397	0	0	0	0	0	0	0	0	0	0	0	0	0	0	0	0	0	0	0	0	1.44233	2.8863	SCRNASEQ: Scaffa_34417156_ranked, RNASEQ: Al_mudares_37368978_male
TNFAIP8	0	0	0	0	0	0	0	0	0	0	0	0	0	1.44256	0	0	0	0	0	0	0	0	0	0	0	0	0	0	0	0	0	0	0	0	0	1.44355	2.88611	SCRNASEQ: Scaffa_34417156_ranked, RNASEQ: Al_mudares_37368978_female
CYTH3	0	0	0	0	0	0	0	0	0	0	0	0	0	0	1.4446	0	0	0	0	0	0	0	0	0	0	0	0	0	0	0	0	0	0	0	0	1.44151	2.88611	SCRNASEQ: Scaffa_34417156_ranked, RNASEQ: Al_mudares_37368978_male
WNT5A	0	0	0	0	0	0	0	0	0	0	0	0	0	0	0	0	0	0	0	0	0	0	0	0	0	0	0	0	1.43911	0	0	1.36273	0	0	0	1.44694	2.88606	SCRNASEQ: Scaffa_34417156_ranked, RNASEQ: Hirani_37876024
ESD	0	0	0	0	0	0	0	0	0	0	0	0	0	0	0	0	0	0	0	0	0	0	0	0	0	0	0	0	1.43924	0	0	0	0	0	0	1.44674	2.88597	SCRNASEQ: Scaffa_34417156_ranked, RNASEQ: Hirani_37876024
RDX	0	0	0	0	0	0	0	0	0	0	0	0	0	0	1.44313	0	0	0	0	0	0	0	0	0	0	0	0	0	0	0	0	0	0	0	0	1.44282	2.88595	SCRNASEQ: Scaffa_34417156_ranked, RNASEQ: Al_mudares_37368978_male
JPT1	0	0	0	0	0	0	0	0	0	0	0	0	0	0	0	0	0	0	0	0	0	0	0	0	0	0	0	0	1.43522	0	0	0	0	0	0	1.45073	2.88595	SCRNASEQ: Scaffa_34417156_ranked, RNASEQ: Hirani_37876024
NKD1	0	0	0	0	0	0	0	0	0	0	0	0	0	0	1.44326	0	0	0	0	0	0	0	0	0	0	0	0	0	0	0	0	0	0	0	0	1.44265	2.88592	SCRNASEQ: Scaffa_34417156_ranked, RNASEQ: Al_mudares_37368978_male
CCDC141	0	0	0	0	0	0	0	0	0	0	0	0	0	0	1.44403	0	0	0	0	0	0	0	0	0	0	0	0	0	1.42728	0	0	0	1.39938	1.39703	1.39625	1.44179	2.88582	SCRNASEQ: Scaffa_34417156_ranked, RNASEQ: Al_mudares_37368978_male
TCF7L1	0	0	0	0	0	0	0	0	0	0	0	0	0	0	0	0	0	0	0	0	0	0	0	0	0	0	0	0	1.44203	0	0	0	0	0	0	1.44358	2.88561	SCRNASEQ: Scaffa_34417156_ranked, RNASEQ: Hirani_37876024
SLC12A2	0	0	0	0	0	0	0	0	0	0	0	0	0	0	0	0	0	0	0	0	0	0	0	0	0	0	0	0	1.43767	0	0	0	0	0	0	1.44791	2.88558	SCRNASEQ: Scaffa_34417156_ranked, RNASEQ: Hirani_37876024
UBE2M	0	0	0	0	0	0	0	0	0	0	0	0	0	1.44222	0	0	0	0	0	0	0	0	0	0	0	0	0	0	0	0	0	0	0	0	0	1.44333	2.88554	SCRNASEQ: Scaffa_34417156_ranked, RNASEQ: Al_mudares_37368978_female
PDIA4	0	0	0	0	0	0	0	0	0	0	0	0	0	1.44097	0	0	0	0	0	0	0	0	0	0	0	0	0	0	0	0	0	0	0	0	0	1.44456	2.88553	SCRNASEQ: Scaffa_34417156_ranked, RNASEQ: Al_mudares_37368978_female
IGFBP7	0	0	0	0	0	0	0	0	0	0	0	0	0	0	0	0	0	0	0	0	0	0	0	0	0	0	0	0	1.43603	0	0	0	0	0	0	1.44946	2.8855	SCRNASEQ: Scaffa_34417156_ranked, RNASEQ: Hirani_37876024
DBP	0	0	0	0	0	0	0	0	0	0	0	0	0	0	1.44306	0	0	0	0	0	0	0	0	0	0	0	0	0	0	0	0	0	0	0	0	1.44243	2.88549	SCRNASEQ: Scaffa_34417156_ranked, RNASEQ: Al_mudares_37368978_male
PTPRD	0	0	0	0	0	0	0	0	0	0	0	0	0	0	0	0	0	0	0	0	0	0	0	0	0	0	0	0	1.44071	0	0	0	0	0	0	1.44471	2.88542	SCRNASEQ: Scaffa_34417156_ranked, RNASEQ: Hirani_37876024
DKK3	0	0	0	0	0	0	0	0	0	0	0	0	0	0	0	0	0	0	0	0	0	0	0	0	0	0	0	0	1.44209	0	0	0	0	0	0	1.44333	2.88542	SCRNASEQ: Scaffa_34417156_ranked, RNASEQ: Hirani_37876024
CNN3	0	0	0	0	0	0	0	0	0	0	0	0	0	0	0	0	0	0	0	0	0	0	0	0	0	0	0	0	1.43574	0	0	1.36774	0	0	0	1.44966	2.88541	SCRNASEQ: Scaffa_34417156_ranked, RNASEQ: Hirani_37876024
HBP1	0	0	0	0	0	0	0	0	0	0	0	0	0	0	0	0	0	0	0	0	0	0	0	0	0	0	0	0	1.43491	0	0	0	0	0	0	1.45043	2.88534	SCRNASEQ: Scaffa_34417156_ranked, RNASEQ: Hirani_37876024
ARID4B	0	0	0	0	0	0	0	0	0	0	0	0	0	0	1.4445	0	0	0	0	0	0	0	0	0	0	0	0	0	0	0	0	0	0	0	0	1.44078	2.88529	SCRNASEQ: Scaffa_34417156_ranked, RNASEQ: Al_mudares_37368978_male
KLK8	0	0	0	0	0	0	0	0	0	0	0	0	0	0	0	0	0	0	0	0	0	0	0	0	0	0	0	0	1.43648	0	0	0	0	0	0	1.44819	2.88467	SCRNASEQ: Scaffa_34417156_ranked, RNASEQ: Hirani_37876024
ERLEC1	0	0	0	0	0	0	0	0	0	0	0	0	0	1.44286	0	0	0	0	0	0	0	0	0	0	0	0	0	0	0	0	0	0	0	0	0	1.44176	2.88462	SCRNASEQ: Scaffa_34417156_ranked, RNASEQ: Al_mudares_37368978_female
NAPA	0	0	0	0	0	0	0	0	0	0	0	0	0	0	1.44418	0	0	0	0	0	0	0	0	0	0	0	0	0	0	0	0	0	0	0	0	1.44034	2.88452	SCRNASEQ: Scaffa_34417156_ranked, RNASEQ: Al_mudares_37368978_male
KLHDC8B	0	0	0	0	0	0	0	0	0	0	0	0	0	0	1.44423	0	0	0	0	0	0	0	0	0	0	0	0	0	0	0	0	0	0	0	0	1.44029	2.88451	SCRNASEQ: Scaffa_34417156_ranked, RNASEQ: Al_mudares_37368978_male
LRRC58	0	0	0	0	0	0	0	0	0	0	0	0	0	0	1.44382	0	0	0	0	0	0	0	0	0	0	0	0	0	0	0	0	0	0	0	0	1.44057	2.88439	SCRNASEQ: Scaffa_34417156_ranked, RNASEQ: Al_mudares_37368978_male
VPS35	0	0	0	0	0	0	0	0	0	0	0	0	0	0	1.44376	0	0	0	0	0	0	0	0	0	0	0	0	0	0	0	0	1.36315	0	0	0	1.4406	2.88436	SCRNASEQ: Scaffa_34417156_ranked, RNASEQ: Al_mudares_37368978_male
IGFBP4	0	0	0	0	0	0	0	0	0	0	0	0	0	0	0	0	0	0	0	0	0	0	0	0	0	0	0	0	1.43474	0	0	0	0	0	0	1.44954	2.88428	SCRNASEQ: Scaffa_34417156_ranked, RNASEQ: Hirani_37876024
EYA2	0	0	0	0	0	0	0	0	0	0	0	0	0	0	0	1.49302	0	0	0	0	0	0	0	0	0	0	0	0	1.43592	0	0	0	1.3912	1.38903	0	0	2.88422	SCRNASEQ: Hurskainen_33692365_endothelial, RNASEQ: Bhattacharya_25150061
PMVK	0	0	0	0	0	0	0	0	0	0	0	0	0	0	1.44348	0	0	0	0	0	0	0	0	0	0	0	0	0	0	0	0	0	0	0	0	1.44072	2.8842	SCRNASEQ: Scaffa_34417156_ranked, RNASEQ: Al_mudares_37368978_male
TUSC3	0	0	0	0	0	0	0	0	0	0	0	0	0	1.44361	0	0	0	0	0	0	0	0	0	0	0	0	0	0	0	0	0	1.36643	0	0	0	1.44058	2.88419	SCRNASEQ: Scaffa_34417156_ranked, RNASEQ: Al_mudares_37368978_female
FOS	0	0	0	0	0	0	0	0	0	0	0	0	0	0	0	0	0	0	0	0	0	0	0	0	0	0	0	0	1.43822	0	0	1.38674	0	0	0	1.4459	2.88412	SCRNASEQ: Scaffa_34417156_ranked, RNASEQ: Hirani_37876024
DCUN1D1	0	0	0	0	0	0	0	0	0	0	0	0	0	0	1.44283	0	0	0	0	0	0	0	0	0	0	0	0	0	0	0	0	0	0	0	0	1.44122	2.88405	SCRNASEQ: Scaffa_34417156_ranked, RNASEQ: Al_mudares_37368978_male
TCF21	0	0	0	0	0	0	0	0	0	0	0	0	0	0	0	0	0	0	0	0	0	0	0	0	0	0	0	0	1.43666	0	0	1.42089	0	0	0	1.44709	2.88375	SCRNASEQ: Scaffa_34417156_ranked, RNASEQ: Hirani_37876024
EPCAM	0	0	0	0	0	0	0	0	0	0	0	0	0	0	0	0	0	0	0	0	0	0	0	0	0	0	0	0	1.43406	0	0	0	0	0	0	1.44937	2.88343	SCRNASEQ: Scaffa_34417156_ranked, RNASEQ: Hirani_37876024
CCAR1	0	0	0	0	0	0	0	0	0	0	0	0	0	0	1.44305	0	0	0	0	0	0	0	0	0	0	0	0	0	0	0	0	1.36182	0	0	0	1.44037	2.88341	SCRNASEQ: Scaffa_34417156_ranked, RNASEQ: Al_mudares_37368978_male
LOXL1	0	0	0	0	0	0	0	0	0	0	0	0	0	0	0	0	0	0	0	0	0	0	0	0	0	0	0	0	1.44035	0	0	0	0	0	0	1.443	2.88334	SCRNASEQ: Scaffa_34417156_ranked, RNASEQ: Hirani_37876024
CSRP2	0	0	0	0	0	0	0	0	0	0	0	0	0	0	0	0	0	0	0	0	0	0	0	0	0	0	0	0	0	0	0	1.43323	0	0	0	1.44998	2.8832	SCRNASEQ: Scaffa_34417156_ranked, RNASEQ: Rao_37310763_ranked
MMD	0	0	0	0	0	0	0	0	0	0	0	0	0	0	0	0	0	0	0	0	0	0	0	0	0	0	0	0	1.43686	0	0	1.36863	0	0	0	1.44612	2.88298	SCRNASEQ: Scaffa_34417156_ranked, RNASEQ: Hirani_37876024
SOX4	0	0	0	0	0	0	0	0	0	0	0	0	0	0	0	0	0	0	0	0	0	0	0	0	0	0	0	0	1.43447	0	0	0	0	0	0	1.44836	2.88283	SCRNASEQ: Scaffa_34417156_ranked, RNASEQ: Hirani_37876024
HSD17B12	0	0	0	0	0	0	0	0	0	0	0	0	0	0	0	0	0	0	0	0	0	0	0	0	0	0	0	0	1.43707	0	0	0	1.39806	1.39573	1.39468	1.44567	2.88274	SCRNASEQ: Scaffa_34417156_ranked, RNASEQ: Hirani_37876024
JADE1	0	0	0	0	0	0	0	0	0	0	0	0	0	0	0	0	0	0	0	0	0	0	0	0	0	0	0	0	1.44115	0	0	0	0	0	0	1.44154	2.88269	SCRNASEQ: Scaffa_34417156_ranked, RNASEQ: Hirani_37876024
LMNA	0	0	0	0	0	0	0	0	0	0	0	0	0	0	0	0	0	0	0	0	0	0	0	0	0	0	0	0	1.43953	0	0	0	0	0	0	1.44272	2.88226	SCRNASEQ: Scaffa_34417156_ranked, RNASEQ: Hirani_37876024
CYCS	0	0	0	0	0	0	0	0	0	0	0	0	0	0	0	0	0	0	0	0	0	0	0	0	0	0	0	0	1.43546	0	0	0	0	0	0	1.44678	2.88224	SCRNASEQ: Scaffa_34417156_ranked, RNASEQ: Hirani_37876024
HTRA1	0	0	0	0	0	0	0	0	0	0	0	0	0	0	0	0	0	0	0	0	0	0	0	0	0	0	0	0	1.43364	0	0	0	0	0	0	1.44829	2.88193	SCRNASEQ: Scaffa_34417156_ranked, RNASEQ: Hirani_37876024
PRDM6	0	0	0	0	0	0	0	0	0	0	0	0	0	0	0	0	0	0	0	0	0	0	0	0	0	0	0	0	1.44102	0	0	0	0	0	0	1.44083	2.88185	SCRNASEQ: Scaffa_34417156_ranked, RNASEQ: Hirani_37876024
GIMAP1	0	0	0	0	0	0	0	0	0	0	0	0	0	0	0	0	0	0	0	0	0	0	0	0	0	0	0	0	1.43194	0	0	0	0	0	0	1.44984	2.88178	SCRNASEQ: Scaffa_34417156_ranked, RNASEQ: Hirani_37876024
CCND2	0	0	0	0	0	0	0	0	0	0	0	0	0	0	0	0	0	0	0	0	0	0	0	0	0	0	0	0	1.43451	0	0	0	0	0	0	1.44681	2.88132	SCRNASEQ: Scaffa_34417156_ranked, RNASEQ: Hirani_37876024
RALB	0	0	0	0	0	0	0	0	0	0	0	0	0	0	0	0	0	0	0	0	0	0	0	0	0	0	0	0	1.43349	0	0	0	1.41108	1.40848	1.4098	1.44746	2.88095	SCRNASEQ: Scaffa_34417156_ranked, RNASEQ: Hirani_37876024
ELK3	0	0	0	0	0	0	0	0	0	0	0	0	0	0	0	0	0	0	0	0	0	0	0	0	0	0	0	0	1.44076	0	0	1.36722	0	0	0	1.44001	2.88078	SCRNASEQ: Scaffa_34417156_ranked, RNASEQ: Hirani_37876024
CACNB2	0	0	0	0	0	0	0	0	0	0	0	0	0	0	0	0	0	0	0	0	0	0	0	0	0	0	0	0	1.43855	0	0	0	1.4046	1.40212	1.40218	1.44216	2.88071	SCRNASEQ: Scaffa_34417156_ranked, RNASEQ: Hirani_37876024
FAM89B	0	0	0	0	0	0	0	0	0	0	0	0	0	0	0	0	0	0	0	0	0	0	0	0	0	0	0	0	1.4325	0	0	0	0	0	0	1.44778	2.88028	SCRNASEQ: Scaffa_34417156_ranked, RNASEQ: Hirani_37876024
MTHFD1	0	0	0	0	0	0	0	0	0	0	0	0	0	0	0	0	0	0	0	0	0	0	0	0	0	0	0	0	1.43385	0	0	0	0	0	0	1.44581	2.87966	SCRNASEQ: Scaffa_34417156_ranked, RNASEQ: Hirani_37876024
PDXP	0	0	0	0	0	0	0	0	0	0	0	0	0	0	0	0	0	0	0	0	0	0	0	0	0	0	0	0	1.43303	0	0	0	0	0	0	1.44659	2.87961	SCRNASEQ: Scaffa_34417156_ranked, RNASEQ: Hirani_37876024
BMP1	0	0	0	0	0	0	0	0	0	0	0	0	0	0	0	0	0	0	0	0	0	0	0	0	0	0	0	0	1.43669	0	0	0	0	0	0	1.44249	2.87918	SCRNASEQ: Scaffa_34417156_ranked, RNASEQ: Hirani_37876024
NME1	0	0	0	0	0	0	0	0	0	0	0	0	0	0	0	0	0	0	0	0	0	0	0	0	0	0	0	0	1.43091	0	0	0	0	0	0	1.44816	2.87907	SCRNASEQ: Scaffa_34417156_ranked, RNASEQ: Hirani_37876024
MEX3D	0	0	0	0	0	0	0	0	0	0	0	0	0	0	0	0	0	0	0	0	0	0	0	0	0	0	0	0	1.43683	0	0	1.36288	0	0	0	1.44217	2.879	SCRNASEQ: Scaffa_34417156_ranked, RNASEQ: Hirani_37876024
GLRX3	0	0	0	0	0	0	0	0	0	0	0	0	0	0	0	0	0	0	0	0	0	0	0	0	0	0	0	0	1.43419	0	0	0	0	0	0	1.44478	2.87898	SCRNASEQ: Scaffa_34417156_ranked, RNASEQ: Hirani_37876024
GRB10	0	0	0	0	0	0	0	0	0	0	0	0	0	0	0	0	0	0	0	0	0	0	0	0	0	0	0	0	1.4347	0	0	0	0	0	0	1.44419	2.87888	SCRNASEQ: Scaffa_34417156_ranked, RNASEQ: Hirani_37876024
RBMS3	0	0	0	0	0	0	0	0	0	0	0	0	0	0	0	0	0	0	0	0	0	0	0	0	0	0	0	0	1.43685	0	0	0	0	0	0	1.44202	2.87887	SCRNASEQ: Scaffa_34417156_ranked, RNASEQ: Hirani_37876024
EPRS1	0	0	0	0	0	0	0	0	0	0	0	0	0	0	0	0	0	0	0	0	0	0	0	0	0	0	0	0	1.4357	0	0	0	1.40596	1.40345	1.40373	1.44311	2.87881	SCRNASEQ: Scaffa_34417156_ranked, RNASEQ: Hirani_37876024
RUNX1T1	0	0	0	0	0	0	0	0	0	0	0	0	0	0	0	0	0	0	0	0	0	0	0	0	0	0	0	0	1.43587	0	0	0	0	0	0	1.44279	2.87867	SCRNASEQ: Scaffa_34417156_ranked, RNASEQ: Hirani_37876024
PPP1R14C	0	0	0	0	0	0	0	0	0	0	0	0	0	0	0	0	0	0	0	0	0	0	0	0	0	0	0	0	1.42924	0	0	0	0	0	0	1.44921	2.87845	SCRNASEQ: Scaffa_34417156_ranked, RNASEQ: Hirani_37876024
SMARCE1	0	0	0	0	0	0	0	0	0	0	0	0	0	0	0	0	0	0	0	0	0	0	0	0	0	0	0	0	1.43336	0	0	0	0	0	0	1.44509	2.87844	SCRNASEQ: Scaffa_34417156_ranked, RNASEQ: Hirani_37876024
B4GALT4	0	0	0	0	0	0	0	0	0	0	0	0	0	0	0	0	0	0	0	0	0	0	0	0	0	0	0	0	1.43315	0	0	0	0	0	0	1.44511	2.87826	SCRNASEQ: Scaffa_34417156_ranked, RNASEQ: Hirani_37876024
MXD4	0	0	0	0	0	0	0	0	0	0	0	0	0	0	0	0	0	0	0	0	0	0	0	0	0	0	0	0	1.43373	0	0	0	0	0	0	1.44452	2.87825	SCRNASEQ: Scaffa_34417156_ranked, RNASEQ: Hirani_37876024
NFIA	0	0	0	0	0	0	0	0	0	0	0	0	0	0	0	0	0	0	0	0	0	0	0	0	0	0	0	0	1.4299	0	0	0	0	0	0	1.44832	2.87823	SCRNASEQ: Scaffa_34417156_ranked, RNASEQ: Hirani_37876024
TMCC3	0	0	0	0	0	0	0	0	0	0	0	0	0	0	0	0	0	0	0	0	0	0	0	0	0	0	0	0	1.4329	0	0	1.36177	0	0	0	1.44532	2.87822	SCRNASEQ: Scaffa_34417156_ranked, RNASEQ: Hirani_37876024
TGFB3	0	0	0	0	0	0	0	0	0	0	0	0	0	0	0	0	0	0	0	0	0	0	0	0	0	0	0	0	1.43543	0	0	0	0	0	0	1.44243	2.87786	SCRNASEQ: Scaffa_34417156_ranked, RNASEQ: Hirani_37876024
PRG4	0	0	0	0	0	0	0	0	0	0	0	0	0	0	0	0	0	0	0	0	0	0	0	0	0	0	0	0	0	0	0	1.46853	1.40927	1.40663	1.40764	0	2.8778	SCRNASEQ: Hurskainen_33692365_endothelial, RNASEQ: Rao_37310763_ranked
CLK1	0	0	0	0	0	0	0	0	0	0	0	0	0	0	0	0	0	0	0	0	0	0	0	0	0	0	0	0	1.43119	0	0	0	1.41447	1.41187	1.41373	1.44658	2.87777	SCRNASEQ: Scaffa_34417156_ranked, RNASEQ: Hirani_37876024
PLEKHG1	0	0	0	0	0	0	0	0	0	0	0	0	0	0	0	0	0	0	0	0	0	0	0	0	0	0	0	0	1.43549	0	0	0	0	0	0	1.44226	2.87775	SCRNASEQ: Scaffa_34417156_ranked, RNASEQ: Hirani_37876024
GATA2	0	0	0	0	0	0	0	0	0	0	0	0	0	0	0	0	0	0	0	0	0	0	0	0	0	0	0	0	1.42878	0	0	0	0	0	0	1.44881	2.87759	SCRNASEQ: Scaffa_34417156_ranked, RNASEQ: Hirani_37876024
RGS16	0	0	0	0	0	0	0	0	0	0	0	0	0	0	0	0	0	0	0	0	0	0	0	0	0	0	0	0	1.43668	0	0	1.3625	1.40898	1.40636	1.40731	1.44089	2.87757	SCRNASEQ: Scaffa_34417156_ranked, RNASEQ: Hirani_37876024
ADRA1A	0	0	0	0	0	0	0	0	0	0	0	0	0	0	0	0	0	0	0	0	0	0	1.39637	0	0	0	0	0	1.432	0	0	0	0	0	0	1.44549	2.8775	SCRNASEQ: Scaffa_34417156_ranked, RNASEQ: Hirani_37876024
VCAM1	0	0	0	0	0	0	0	0	0	0	0	0	0	0	0	0	0	0	0	0	0	0	0	0	0	0	0	0	1.43327	0	0	0	0	0	0	1.44422	2.87748	SCRNASEQ: Scaffa_34417156_ranked, RNASEQ: Hirani_37876024
Marcks	0	0	0	0	0	0	0	0	0	0	0	0	0	0	0	0	0	0	0	0	0	0	0	0	0	0	0	0	1.42772	0	0	0	0	0	0	1.44967	2.8774	SCRNASEQ: Scaffa_34417156_ranked, RNASEQ: Hirani_37876024
BRD3	0	0	0	0	0	0	0	0	0	0	0	0	0	0	0	0	0	0	0	0	0	0	0	0	0	0	0	0	1.43625	0	0	0	1.40315	1.40067	1.40049	1.44113	2.87738	SCRNASEQ: Scaffa_34417156_ranked, RNASEQ: Hirani_37876024
H2AZ2	0	0	0	0	0	0	0	0	0	0	0	0	0	0	0	0	0	0	0	0	0	0	0	0	0	0	0	0	1.42552	0	0	0	0	0	0	1.45175	2.87727	SCRNASEQ: Scaffa_34417156_ranked, RNASEQ: Hirani_37876024
DPT	0	0	0	0	0	0	0	0	0	0	0	0	0	0	0	0	0	0	0	0	0	0	0	0	0	0	0	0	1.43029	0	0	0	1.40806	1.40547	1.40619	1.44693	2.87723	SCRNASEQ: Scaffa_34417156_ranked, RNASEQ: Hirani_37876024
ABHD17A	0	0	0	0	0	0	0	0	0	0	0	0	0	0	0	0	0	0	0	0	0	0	0	0	0	0	0	0	1.42689	0	0	0	0	0	0	1.44979	2.87669	SCRNASEQ: Scaffa_34417156_ranked, RNASEQ: Hirani_37876024
ZNF536	0	0	0	0	0	0	0	0	0	0	0	0	0	0	0	0	0	0	0	0	0	0	0	0	0	0	0	0	1.43284	0	0	0	0	0	0	1.44373	2.87656	SCRNASEQ: Scaffa_34417156_ranked, RNASEQ: Hirani_37876024
SUN2	0	0	0	0	0	0	0	0	0	0	0	0	0	0	0	0	0	0	0	0	0	0	0	0	0	0	0	0	1.43324	0	0	0	0	0	0	1.44269	2.87593	SCRNASEQ: Scaffa_34417156_ranked, RNASEQ: Hirani_37876024
PAG1	0	0	0	0	0	0	0	0	0	0	0	0	0	0	0	0	0	0	0	0	0	0	0	0	0	0	0	0	1.42828	0	0	0	0	0	0	1.44758	2.87586	SCRNASEQ: Scaffa_34417156_ranked, RNASEQ: Hirani_37876024
BNIP3L	0	0	0	0	0	0	0	0	0	0	0	0	0	0	0	0	0	0	0	0	0	0	0	0	0	0	0	0	1.4279	0	0	0	0	0	0	1.44777	2.87567	SCRNASEQ: Scaffa_34417156_ranked, RNASEQ: Hirani_37876024
TENM4	0	0	0	0	0	0	0	0	0	0	0	0	0	0	0	0	0	0	0	0	0	0	0	0	0	0	0	0	1.43193	0	0	0	0	0	0	1.44371	2.87564	SCRNASEQ: Scaffa_34417156_ranked, RNASEQ: Hirani_37876024
ANP32E	0	0	0	0	0	0	0	0	0	0	0	0	0	0	0	0	0	0	0	0	0	0	0	0	0	0	0	0	1.42591	0	0	0	0	0	0	1.44968	2.87559	SCRNASEQ: Scaffa_34417156_ranked, RNASEQ: Hirani_37876024
CDO1	0	0	0	0	0	0	0	0	0	0	0	0	0	0	0	0	0	0	0	0	0	0	0	0	0	0	0	0	1.43003	0	0	1.3671	0	0	0	1.44548	2.87552	SCRNASEQ: Scaffa_34417156_ranked, RNASEQ: Hirani_37876024
NET1	0	0	0	0	0	0	0	0	0	0	0	0	0	0	0	0	0	0	0	0	0	0	0	0	0	0	0	0	1.43339	0	0	0	0	0	0	1.44211	2.8755	SCRNASEQ: Scaffa_34417156_ranked, RNASEQ: Hirani_37876024
SERPINB6	0	0	0	0	0	0	0	0	0	0	0	0	0	0	0	0	0	0	0	0	0	0	0	0	0	0	0	0	1.42794	0	0	0	0	0	0	1.44755	2.87548	SCRNASEQ: Scaffa_34417156_ranked, RNASEQ: Hirani_37876024
NUPR1	0	0	0	0	0	0	0	0	0	0	0	0	0	0	0	0	0	0	0	0	0	0	0	0	0	0	0	0	1.42642	0	0	0	0	0	0	1.44899	2.87541	SCRNASEQ: Scaffa_34417156_ranked, RNASEQ: Hirani_37876024
ALDH1A1	0	0	0	0	0	0	0	0	0	0	0	0	0	0	0	0	0	0	0	0	0	0	0	0	0	0	0	0	1.42629	0	0	0	0	0	0	1.44884	2.87514	SCRNASEQ: Scaffa_34417156_ranked, RNASEQ: Hirani_37876024
IFNGR1	0	0	0	0	0	0	0	0	0	0	0	0	0	0	0	0	0	0	0	0	0	0	0	0	0	0	0	0	1.42751	0	0	1.36168	0	0	0	1.44755	2.87506	SCRNASEQ: Scaffa_34417156_ranked, RNASEQ: Hirani_37876024
LRRC17	0	0	0	0	0	0	0	0	0	0	0	0	0	0	0	0	0	0	0	0	0	0	0	0	0	0	0	0	1.42946	0	0	0	0	0	0	1.44524	2.8747	SCRNASEQ: Scaffa_34417156_ranked, RNASEQ: Hirani_37876024
CSNK1E	0	0	0	0	0	0	0	0	0	0	0	0	0	0	0	0	0	0	0	0	0	0	0	0	0	0	0	0	1.43068	0	0	0	0	0	0	1.44384	2.87452	SCRNASEQ: Scaffa_34417156_ranked, RNASEQ: Hirani_37876024
IL1R1	0	0	0	0	0	0	0	0	0	0	0	0	0	0	0	0	0	0	0	0	0	0	0	0	0	0	0	0	1.45905	0	0	0	1.41541	1.41281	1.4148	0	2.87446	SCRNASEQ: Hurskainen_33692365_endothelial, RNASEQ: Hirani_37876024
C1orf115	0	0	0	0	0	0	0	0	0	0	0	0	0	0	0	0	0	0	0	0	0	0	0	0	0	0	0	0	1.46838	0	0	1.36257	1.40602	1.40351	1.4038	0	2.8744	SCRNASEQ: Hurskainen_33692365_endothelial, RNASEQ: Hirani_37876024
NR2F6	0	0	0	0	0	0	0	0	0	0	0	0	0	0	0	0	0	0	0	0	0	0	0	0	0	0	0	0	1.43444	0	0	0	0	0	0	1.43991	2.87435	SCRNASEQ: Scaffa_34417156_ranked, RNASEQ: Hirani_37876024
MAP7D1	0	0	0	0	0	0	0	0	0	0	0	0	0	0	0	0	0	0	0	0	0	0	0	0	0	0	0	0	1.43388	0	0	0	0	0	0	1.44034	2.87421	SCRNASEQ: Scaffa_34417156_ranked, RNASEQ: Hirani_37876024
RPL7L1	0	0	0	0	0	0	0	0	0	0	0	0	0	0	0	0	0	0	0	0	0	0	0	0	0	0	0	0	1.43247	0	0	0	0	0	0	1.44155	2.87402	SCRNASEQ: Scaffa_34417156_ranked, RNASEQ: Hirani_37876024
KCNE4	0	0	0	0	0	0	0	0	0	0	0	0	0	0	0	0	0	0	0	0	0	0	0	0	0	0	0	0	1.46108	0	0	0	1.41285	1.41026	1.41184	0	2.87393	SCRNASEQ: Hurskainen_33692365_endothelial, RNASEQ: Hirani_37876024
SMTN	0	0	0	0	0	0	0	0	0	0	0	0	0	0	0	0	0	0	0	0	0	0	0	0	0	0	0	0	1.43067	0	0	0	0	0	0	1.4432	2.87387	SCRNASEQ: Scaffa_34417156_ranked, RNASEQ: Hirani_37876024
TUBB4B	0	0	0	0	0	0	0	0	0	0	0	0	0	0	0	0	0	0	0	0	0	0	0	0	0	0	0	0	1.42381	0	0	0	1.40401	1.40151	1.4015	1.44977	2.87357	SCRNASEQ: Scaffa_34417156_ranked, RNASEQ: Hirani_37876024
PGAM1	0	0	0	0	0	0	0	0	0	0	0	0	0	0	0	0	0	0	0	0	0	0	0	0	0	0	0	0	1.43285	0	0	0	0	0	0	1.4407	2.87355	SCRNASEQ: Scaffa_34417156_ranked, RNASEQ: Hirani_37876024
ADGRA3	0	0	0	0	0	0	0	0	0	0	0	0	0	0	0	0	0	0	0	0	0	0	0	0	0	0	0	0	1.43096	0	0	0	0	0	0	1.44256	2.87352	SCRNASEQ: Scaffa_34417156_ranked, RNASEQ: Hirani_37876024
TSHZ1	0	0	0	0	0	0	0	0	0	0	0	0	0	0	0	0	0	0	0	0	0	0	0	0	0	0	0	0	1.42943	0	0	0	0	0	0	1.44367	2.8731	SCRNASEQ: Scaffa_34417156_ranked, RNASEQ: Hirani_37876024
P3H3	0	0	0	0	0	0	0	0	0	0	0	0	0	0	0	0	0	0	0	0	0	0	0	0	0	0	0	0	1.43011	0	0	0	0	0	0	1.44295	2.87306	SCRNASEQ: Scaffa_34417156_ranked, RNASEQ: Hirani_37876024
NIN	0	0	0	0	0	0	0	0	0	0	0	0	0	0	0	0	0	0	0	0	0	0	0	0	0	0	0	0	1.42446	0	0	0	0	0	0	1.44837	2.87283	SCRNASEQ: Scaffa_34417156_ranked, RNASEQ: Hirani_37876024
MACROH2A2	0	0	0	0	0	0	0	0	0	0	0	0	0	0	0	0	0	0	0	0	0	0	0	0	0	0	0	0	1.42795	0	0	0	0	0	0	1.44469	2.87265	SCRNASEQ: Scaffa_34417156_ranked, RNASEQ: Hirani_37876024
ADAMTS1	0	0	0	0	0	0	0	0	0	0	0	0	0	0	0	0	0	0	0	0	0	0	0	0	0	0	0	0	1.42356	0	0	0	0	0	0	1.44897	2.87254	SCRNASEQ: Scaffa_34417156_ranked, RNASEQ: Hirani_37876024
KDELR3	0	0	0	0	0	0	0	0	0	0	0	0	0	0	0	0	0	0	0	0	0	0	0	0	0	0	0	0	1.4287	0	0	0	0	0	0	1.44383	2.87253	SCRNASEQ: Scaffa_34417156_ranked, RNASEQ: Hirani_37876024
SMARCA5	0	0	0	0	0	0	0	0	0	0	0	0	0	0	0	0	0	0	0	0	0	0	0	0	0	0	0	0	1.42573	0	0	0	0	0	0	1.44673	2.87246	SCRNASEQ: Scaffa_34417156_ranked, RNASEQ: Hirani_37876024
ZFP36L1	0	0	0	0	0	0	0	0	0	0	0	0	0	0	0	0	0	0	0	0	0	0	0	0	0	0	0	0	1.42576	0	0	0	0	0	0	1.44669	2.87245	SCRNASEQ: Scaffa_34417156_ranked, RNASEQ: Hirani_37876024
MEF2C	0	0	0	0	0	0	0	0	0	0	0	0	0	0	0	0	0	0	0	0	0	0	0	0	0	0	0	0	1.42801	0	0	1.37301	0	0	0	1.44427	2.87228	SCRNASEQ: Scaffa_34417156_ranked, RNASEQ: Hirani_37876024
GNG11	0	0	0	0	0	0	0	0	0	0	0	0	0	0	0	0	0	0	0	0	0	0	0	0	0	0	0	0	1.42142	0	0	0	0	0	0	1.45076	2.87218	SCRNASEQ: Scaffa_34417156_ranked, RNASEQ: Hirani_37876024
LMNB1	0	0	0	0	0	0	0	0	0	0	0	0	0	0	0	0	0	0	0	0	0	0	0	0	0	0	0	0	1.43102	0	0	1.36177	0	0	0	1.44096	2.87198	SCRNASEQ: Scaffa_34417156_ranked, RNASEQ: Hirani_37876024
MDH2	0	0	0	0	0	0	0	0	0	0	0	0	0	0	0	0	0	0	0	0	0	0	0	0	0	0	0	0	1.43174	0	0	0	0	0	0	1.44022	2.87196	SCRNASEQ: Scaffa_34417156_ranked, RNASEQ: Hirani_37876024
PREX2	0	0	0	0	0	0	0	0	0	0	0	0	0	0	0	0	0	0	0	0	0	0	0	0	0	0	0	0	1.42443	0	0	0	1.41667	1.41403	1.41626	1.44745	2.87189	SCRNASEQ: Scaffa_34417156_ranked, RNASEQ: Hirani_37876024
ARHGAP42	0	0	0	0	0	0	0	0	0	0	0	0	0	0	0	0	0	0	0	0	0	0	0	0	0	0	0	0	1.42917	0	0	0	0	0	0	1.44266	2.87183	SCRNASEQ: Scaffa_34417156_ranked, RNASEQ: Hirani_37876024
ADAM23	0	0	0	0	0	0	0	0	0	0	0	0	0	0	0	0	0	0	0	0	0	0	0	0	0	0	0	0	1.45776	0	0	0	1.41399	1.41142	1.41319	0	2.87176	SCRNASEQ: Hurskainen_33692365_endothelial, RNASEQ: Hirani_37876024
OLA1	0	0	0	0	0	0	0	0	0	0	0	0	0	0	0	0	0	0	0	0	0	0	0	0	0	0	0	0	1.43057	0	0	0	1.39975	1.39738	1.39665	1.44114	2.87171	SCRNASEQ: Scaffa_34417156_ranked, RNASEQ: Hirani_37876024
TET3	0	0	0	0	0	0	0	0	0	0	0	0	0	0	0	0	0	0	0	0	0	0	0	0	0	0	0	0	1.43125	0	0	1.36168	0	0	0	1.4404	2.87164	SCRNASEQ: Scaffa_34417156_ranked, RNASEQ: Hirani_37876024
ATP5F1B	0	0	0	0	0	0	0	0	0	0	0	0	0	0	0	0	0	0	0	0	0	0	0	0	0	0	0	0	1.42108	0	0	0	0	0	0	1.45044	2.87151	SCRNASEQ: Scaffa_34417156_ranked, RNASEQ: Hirani_37876024
AXL	0	0	0	0	0	0	0	0	0	0	0	0	0	0	0	0	0	0	0	0	0	0	0	0	0	0	0	0	1.42303	0	0	0	0	0	0	1.44841	2.87144	SCRNASEQ: Scaffa_34417156_ranked, RNASEQ: Hirani_37876024
CCT7	0	0	0	0	0	0	0	0	0	0	0	0	0	0	0	0	0	0	0	0	0	0	0	0	0	0	0	0	1.43109	0	0	0	0	0	0	1.44015	2.87124	SCRNASEQ: Scaffa_34417156_ranked, RNASEQ: Hirani_37876024
TGIF2	0	0	0	0	0	0	0	0	0	0	0	0	0	0	0	0	0	0	0	0	0	0	0	0	0	0	0	0	1.47878	0	0	0	1.39234	1.39017	1.388	0	2.87112	SCRNASEQ: Hurskainen_33692365_endothelial, RNASEQ: Hirani_37876024
MYO6	0	0	0	0	0	0	0	0	0	0	0	0	0	0	0	0	0	0	0	0	0	0	0	0	0	0	0	0	1.42605	0	0	0	0	0	0	1.445	2.87105	SCRNASEQ: Scaffa_34417156_ranked, RNASEQ: Hirani_37876024
CFTR	0	0	0	0	0	0	0	0	0	0	0	0	0	0	0	0	0	0	0	0	0	0	0	0	0	0	0	0	1.42521	0	0	0	0	0	0	1.44582	2.87103	SCRNASEQ: Scaffa_34417156_ranked, RNASEQ: Hirani_37876024
JMY	0	0	0	0	0	0	0	0	0	0	0	0	0	0	0	0	0	0	0	0	0	0	0	0	0	0	0	0	1.43012	0	0	0	0	0	0	1.44088	2.871	SCRNASEQ: Scaffa_34417156_ranked, RNASEQ: Hirani_37876024
SH3PXD2B	0	0	0	0	0	0	0	0	0	0	0	0	0	0	0	0	0	0	0	0	0	0	0	0	0	0	0	0	1.42619	0	0	0	0	0	0	1.44463	2.87082	SCRNASEQ: Scaffa_34417156_ranked, RNASEQ: Hirani_37876024
PTPRS	0	0	0	0	0	0	0	0	0	0	0	0	0	0	0	0	0	0	0	0	0	0	0	0	0	0	0	0	1.42469	0	0	0	0	0	0	1.44584	2.87053	SCRNASEQ: Scaffa_34417156_ranked, RNASEQ: Hirani_37876024
CLIP3	0	0	0	0	0	0	0	0	0	0	0	0	0	0	0	0	0	0	0	0	0	0	0	0	0	0	0	0	1.42995	0	0	0	0	0	0	1.44039	2.87034	SCRNASEQ: Scaffa_34417156_ranked, RNASEQ: Hirani_37876024
WT1	0	0	0	0	0	0	0	0	0	0	0	0	0	0	0	0	0	0	0	0	0	0	0	0	0	0	0	0	0	0	0	1.47264	1.39759	1.39527	1.39412	0	2.87023	SCRNASEQ: Hurskainen_33692365_endothelial, RNASEQ: Rao_37310763_ranked
RERG	0	0	0	0	0	0	0	0	0	0	0	0	0	0	0	0	0	0	0	0	0	0	0	0	0	0	0	0	1.42745	0	0	0	0	0	0	1.44269	2.87014	SCRNASEQ: Scaffa_34417156_ranked, RNASEQ: Hirani_37876024
TCF7	0	0	0	0	0	0	0	0	0	0	0	0	0	0	0	0	0	0	0	0	0	0	0	0	0	0	0	0	1.42668	0	0	0	0	0	0	1.44335	2.87003	SCRNASEQ: Scaffa_34417156_ranked, RNASEQ: Hirani_37876024
PRR14	0	0	0	0	0	0	0	0	0	0	0	0	0	0	0	0	0	0	0	0	0	0	0	0	0	0	0	0	1.42133	0	0	1.36203	0	0	0	1.44868	2.87002	SCRNASEQ: Scaffa_34417156_ranked, RNASEQ: Hirani_37876024
ID2	0	0	0	0	0	0	0	0	0	0	0	0	0	0	0	0	0	0	0	0	0	0	0	0	0	0	0	0	1.42428	0	0	0	0	0	0	1.44572	2.87	SCRNASEQ: Scaffa_34417156_ranked, RNASEQ: Hirani_37876024
RRAS2	0	0	0	0	0	0	0	0	0	0	0	0	0	0	0	0	0	0	0	0	0	0	0	0	0	0	0	0	1.42556	0	0	0	0	0	0	1.44438	2.86994	SCRNASEQ: Scaffa_34417156_ranked, RNASEQ: Hirani_37876024
ST3GAL5	0	0	0	0	0	0	0	0	0	0	0	0	0	0	0	0	0	0	0	0	0	0	0	0	0	0	0	0	1.42225	0	0	0	0	0	0	1.44769	2.86994	SCRNASEQ: Scaffa_34417156_ranked, RNASEQ: Hirani_37876024
PTOV1	0	0	0	0	0	0	0	0	0	0	0	0	0	0	0	0	0	0	0	0	0	0	0	0	0	0	0	0	1.42306	0	0	0	0	0	0	1.44652	2.86958	SCRNASEQ: Scaffa_34417156_ranked, RNASEQ: Hirani_37876024
IL1A	0	0	0	0	0	0	0	0	0	0	0	0	0	0	0	0	0	0	0	0	0	0	0	0	0	0	0	0	0	0	0	1.47434	1.39506	1.39281	1.39121	0	2.8694	SCRNASEQ: Hurskainen_33692365_endothelial, RNASEQ: Rao_37310763_ranked
CEBPA	0	0	0	0	0	0	0	0	0	0	0	0	0	0	0	0	0	0	0	0	0	0	0	0	0	0	0	0	1.42353	0	0	0	0	0	0	1.44578	2.86931	SCRNASEQ: Scaffa_34417156_ranked, RNASEQ: Hirani_37876024
CCDC8	0	0	0	0	0	0	0	0	0	0	0	0	0	0	0	0	0	0	0	0	0	0	0	0	0	0	0	0	1.42812	0	0	0	0	0	0	1.44099	2.86912	SCRNASEQ: Scaffa_34417156_ranked, RNASEQ: Hirani_37876024
PLS3	0	0	0	0	0	0	0	0	0	0	0	0	0	0	0	0	0	0	0	0	0	0	0	0	0	0	0	0	1.42291	0	0	0	0	0	0	1.44621	2.86911	SCRNASEQ: Scaffa_34417156_ranked, RNASEQ: Hirani_37876024
TMA7	0	0	0	0	0	0	0	0	0	0	0	0	0	0	0	0	0	0	0	0	0	0	0	0	0	0	0	0	0	0	0	1.40746	0	0	0	1.46159	2.86905	SCRNASEQ: Scaffa_34417156_ranked, RNASEQ: Rao_37310763_ranked
GAS1	0	0	0	0	0	0	0	0	0	0	0	0	0	0	0	0	0	0	0	0	0	0	0	0	0	0	0	0	1.42513	0	0	0	0	0	0	1.44387	2.86901	SCRNASEQ: Scaffa_34417156_ranked, RNASEQ: Hirani_37876024
ZNF703	0	0	0	0	0	0	0	0	0	0	0	0	0	0	0	0	0	0	0	0	0	0	0	0	0	0	0	0	1.42631	0	0	0	0	0	0	1.44264	2.86894	SCRNASEQ: Scaffa_34417156_ranked, RNASEQ: Hirani_37876024
FBN2	0	0	0	0	0	0	0	0	0	0	0	0	0	0	0	0	0	0	0	0	0	0	0	0	0	0	0	0	1.42499	0	0	1.4218	0	0	0	1.44394	2.86894	SCRNASEQ: Scaffa_34417156_ranked, RNASEQ: Hirani_37876024
IFITM2	0	0	0	0	0	0	0	0	0	0	0	0	0	0	0	0	0	0	0	0	0	0	0	0	0	0	0	0	0	0	0	1.41935	0	0	0	1.44956	2.8689	SCRNASEQ: Scaffa_34417156_ranked, RNASEQ: Rao_37310763_ranked
LMCD1	0	0	0	0	0	0	0	0	0	0	0	0	0	0	0	0	0	0	0	0	0	0	0	0	0	0	0	0	1.42571	0	0	1.36427	0	0	0	1.44315	2.86885	SCRNASEQ: Scaffa_34417156_ranked, RNASEQ: Hirani_37876024
HOXB4	0	0	0	0	0	0	0	0	0	0	0	0	0	0	0	0	0	0	0	0	0	0	0	0	0	0	0	0	1.42508	0	0	1.36189	0	0	0	1.44368	2.86876	SCRNASEQ: Scaffa_34417156_ranked, RNASEQ: Hirani_37876024
GLT8D1	0	0	0	0	0	0	0	0	0	0	0	0	0	0	0	0	0	0	0	0	0	0	0	0	0	0	0	0	1.42844	0	0	0	0	0	0	1.44021	2.86865	SCRNASEQ: Scaffa_34417156_ranked, RNASEQ: Hirani_37876024
GYG1	0	0	0	0	0	0	0	0	0	0	0	0	0	0	0	0	0	0	0	0	0	0	0	0	0	0	0	0	1.42263	0	0	0	0	0	0	1.44598	2.86862	SCRNASEQ: Scaffa_34417156_ranked, RNASEQ: Hirani_37876024
RSU1	0	0	0	0	0	0	0	0	0	0	0	0	0	0	0	0	0	0	0	0	0	0	0	0	0	0	0	0	1.42432	0	0	0	1.40472	1.40224	1.40233	1.44422	2.86854	SCRNASEQ: Scaffa_34417156_ranked, RNASEQ: Hirani_37876024
MPC1	0	0	0	0	0	0	0	0	0	0	0	0	0	0	0	0	0	0	0	0	0	0	0	0	0	0	0	0	1.42283	0	0	0	0	0	0	1.44554	2.86838	SCRNASEQ: Scaffa_34417156_ranked, RNASEQ: Hirani_37876024
FKBP7	0	0	0	0	0	0	0	0	0	0	0	0	0	0	0	0	0	0	0	0	0	0	0	0	0	0	0	0	1.42694	0	0	0	1.39942	1.39706	1.3963	1.44143	2.86837	SCRNASEQ: Scaffa_34417156_ranked, RNASEQ: Hirani_37876024
PAM	0	0	0	0	0	0	0	0	0	0	0	0	0	0	0	0	0	0	0	0	0	0	0	0	0	0	0	0	1.42739	0	0	1.36738	1.41136	1.40872	1.41012	1.44058	2.86798	SCRNASEQ: Scaffa_34417156_ranked, RNASEQ: Hirani_37876024
SEPTIN9	0	0	0	0	0	0	0	0	0	0	0	0	0	0	0	0	0	0	0	0	0	0	0	0	0	0	0	0	1.42592	0	0	0	0	0	0	1.44173	2.86765	SCRNASEQ: Scaffa_34417156_ranked, RNASEQ: Hirani_37876024
PHF14	0	0	0	0	0	0	0	0	0	0	0	0	0	0	0	0	0	0	0	0	0	0	0	0	0	0	0	0	1.42113	0	0	0	0	0	0	1.4462	2.86734	SCRNASEQ: Scaffa_34417156_ranked, RNASEQ: Hirani_37876024
FAM178B	0	0	0	0	0	0	0	0	0	0	0	0	0	0	0	0	0	0	0	0	0	0	0	0	0	0	0	0	1.45154	0	0	0	1.41578	1.41318	1.41523	0	2.86732	SCRNASEQ: Hurskainen_33692365_endothelial, RNASEQ: Hirani_37876024
ADCY7	0	0	0	0	0	0	0	0	0	0	0	0	0	0	0	0	0	0	0	0	0	0	0	0	0	0	0	0	1.42685	0	0	0	0	0	0	1.44041	2.86726	SCRNASEQ: Scaffa_34417156_ranked, RNASEQ: Hirani_37876024
CTXN1	0	0	0	0	0	0	0	0	0	0	0	0	0	0	0	0	0	0	0	0	0	0	0	0	0	0	0	0	1.42342	0	0	0	0	0	0	1.44365	2.86707	SCRNASEQ: Scaffa_34417156_ranked, RNASEQ: Hirani_37876024
HIC1	0	0	0	0	0	0	0	0	0	0	0	0	0	0	0	0	0	0	0	0	0	0	0	0	0	0	0	0	1.42655	0	0	1.40396	0	0	0	1.44046	2.86701	SCRNASEQ: Scaffa_34417156_ranked, RNASEQ: Hirani_37876024
PLK2	0	0	0	0	0	0	0	0	0	0	0	0	0	0	0	0	0	0	0	0	0	0	0	0	0	0	0	0	1.42082	0	0	0	0	0	0	1.44609	2.86691	SCRNASEQ: Scaffa_34417156_ranked, RNASEQ: Hirani_37876024
HPRT1	0	0	0	0	0	0	0	0	0	0	0	0	0	0	0	0	0	0	0	0	0	0	0	0	0	0	0	0	1.42115	0	0	0	0	0	0	1.44565	2.8668	SCRNASEQ: Scaffa_34417156_ranked, RNASEQ: Hirani_37876024
KDM7A	0	0	0	0	0	0	0	0	0	0	0	0	0	0	0	0	0	0	0	0	0	0	0	0	0	0	0	0	1.42188	0	0	0	0	0	0	1.44492	2.86679	SCRNASEQ: Scaffa_34417156_ranked, RNASEQ: Hirani_37876024
SEPTIN11	0	0	0	0	0	0	0	0	0	0	0	0	0	0	0	0	0	0	0	0	0	0	0	0	0	0	0	0	1.42301	0	0	0	0	0	0	1.44376	2.86676	SCRNASEQ: Scaffa_34417156_ranked, RNASEQ: Hirani_37876024
CERK	0	0	0	0	0	0	0	0	0	0	0	0	0	0	0	0	0	0	0	0	0	0	0	0	0	0	0	0	1.42152	0	0	0	0	0	0	1.44517	2.86669	SCRNASEQ: Scaffa_34417156_ranked, RNASEQ: Hirani_37876024
ZMYND8	0	0	0	0	0	0	0	0	0	0	0	0	0	0	0	0	0	0	0	0	0	0	0	0	0	0	0	0	1.47524	0	0	0	1.39118	1.38901	0	0	2.86642	SCRNASEQ: Hurskainen_33692365_endothelial, RNASEQ: Hirani_37876024
PLXNA2	0	0	0	0	0	0	0	0	0	0	0	0	0	0	0	0	0	0	0	0	0	0	0	0	0	0	0	0	1.42468	0	0	0	1.40538	1.40289	1.40309	1.4416	2.86627	SCRNASEQ: Scaffa_34417156_ranked, RNASEQ: Hirani_37876024
COLGALT1	0	0	0	0	0	0	0	0	0	0	0	0	0	0	0	0	0	0	0	0	0	0	0	0	0	0	0	0	1.42486	0	0	0	0	0	0	1.44087	2.86574	SCRNASEQ: Scaffa_34417156_ranked, RNASEQ: Hirani_37876024
ERF	0	0	0	0	0	0	0	0	0	0	0	0	0	0	0	0	0	0	0	0	0	0	0	0	0	0	0	0	1.42393	0	0	0	0	0	0	1.44178	2.86571	SCRNASEQ: Scaffa_34417156_ranked, RNASEQ: Hirani_37876024
ANTXR1	0	0	0	0	0	0	0	0	0	0	0	0	0	0	0	0	0	0	0	0	0	0	0	0	0	0	0	0	1.42425	0	0	0	0	0	0	1.44126	2.86551	SCRNASEQ: Scaffa_34417156_ranked, RNASEQ: Hirani_37876024
UBE2E3	0	0	0	0	0	0	0	0	0	0	0	0	0	0	0	0	0	0	0	0	0	0	0	0	0	0	0	0	1.42086	0	0	0	1.39933	1.39698	1.3962	1.4446	2.86547	SCRNASEQ: Scaffa_34417156_ranked, RNASEQ: Hirani_37876024
TRAF7	0	0	0	0	0	0	0	0	0	0	0	0	0	0	0	0	0	0	0	0	0	0	0	0	0	0	0	0	1.42288	0	0	0	0	0	0	1.44239	2.86526	SCRNASEQ: Scaffa_34417156_ranked, RNASEQ: Hirani_37876024
EMILIN1	0	0	0	0	0	0	0	0	0	0	0	0	0	0	0	0	0	0	0	0	0	0	0	0	0	0	0	0	1.42112	0	0	0	0	0	0	1.44383	2.86495	SCRNASEQ: Scaffa_34417156_ranked, RNASEQ: Hirani_37876024
ADAM19	0	0	0	0	0	0	0	0	0	0	0	0	0	0	0	0	0	0	0	0	0	0	0	0	0	0	0	0	1.42109	0	0	0	0	0	0	1.44385	2.86494	SCRNASEQ: Scaffa_34417156_ranked, RNASEQ: Hirani_37876024
SLC30A1	0	0	0	0	0	0	0	0	0	0	0	0	0	0	0	0	0	0	0	0	0	0	0	0	0	0	0	0	0	0	0	1.45888	1.40559	1.40309	1.40332	0	2.86447	SCRNASEQ: Hurskainen_33692365_endothelial, RNASEQ: Rao_37310763_ranked
TSPAN6	0	0	0	0	0	0	0	0	0	0	0	0	0	0	0	0	0	0	0	0	0	0	0	0	0	0	0	0	1.42122	0	0	0	0	0	0	1.44318	2.8644	SCRNASEQ: Scaffa_34417156_ranked, RNASEQ: Hirani_37876024
SLC4A4	0	0	0	0	0	0	0	0	0	0	0	0	0	0	0	0	0	0	0	0	0	0	0	0	0	0	0	0	1.42366	0	0	0	0	0	0	1.44063	2.86429	SCRNASEQ: Scaffa_34417156_ranked, RNASEQ: Hirani_37876024
HNRNPA1	0	0	0	0	0	0	0	0	0	0	0	0	0	0	0	0	0	0	0	0	0	0	0	0	0	0	0	0	0	0	0	1.41434	0	0	0	1.4499	2.86424	SCRNASEQ: Scaffa_34417156_ranked, RNASEQ: Rao_37310763_ranked
STOM	0	0	0	0	0	0	0	0	0	0	0	0	0	1.45074	0	0	0	0	0	0	0	0	0	0	0	0	0	0	1.46245	0	0	0	1.40147	1.39905	1.3986	0	2.86392	SCRNASEQ: Hurskainen_33692365_endothelial, RNASEQ: Hirani_37876024
MYLK	0	0	0	0	0	0	0	0	0	0	0	0	0	0	0	0	0	0	0	0	0	0	0	0	0	0	0	0	1.42235	0	0	0	0	0	0	1.44144	2.86379	SCRNASEQ: Scaffa_34417156_ranked, RNASEQ: Hirani_37876024
ZNF260	0	0	0	0	0	0	0	0	0	0	0	0	0	0	0	0	0	0	0	0	0	0	0	0	0	0	0	0	1.42138	0	0	0	0	0	0	1.44231	2.86369	SCRNASEQ: Scaffa_34417156_ranked, RNASEQ: Hirani_37876024
CYC1	0	0	0	0	0	0	0	0	0	0	0	0	0	0	0	0	0	0	0	0	0	0	0	0	0	0	0	0	1.42195	0	0	0	0	0	0	1.44137	2.86332	SCRNASEQ: Scaffa_34417156_ranked, RNASEQ: Hirani_37876024
INPP5D	0	0	0	0	0	0	0	0	0	0	0	0	0	1.45085	0	0	0	0	0	0	0	0	0	0	0	0	0	0	0	0	0	0	1.4122	1.40963	1.41115	0	2.86305	SCRNASEQ: Hurskainen_33692365_endothelial, RNASEQ: Al_mudares_37368978_female
IKBKE	0	0	0	0	0	0	0	0	0	0	0	0	0	0	0	0	0	0	0	0	0	0	0	0	0	0	0	0	0	0	0	1.45249	1.41051	1.40791	1.40912	0	2.86299	SCRNASEQ: Hurskainen_33692365_endothelial, RNASEQ: Rao_37310763_ranked
RFTN2	0	0	0	0	0	0	0	0	0	0	0	0	0	0	0	0	0	0	0	0	0	0	0	0	0	0	0	0	1.44795	0	0	0	1.41464	1.41206	1.41394	0	2.86259	SCRNASEQ: Hurskainen_33692365_endothelial, RNASEQ: Hirani_37876024
VPS72	0	0	0	0	0	0	0	0	0	0	0	0	0	0	0	0	0	0	0	0	0	0	0	0	0	0	0	0	1.42199	0	0	0	0	0	0	1.44055	2.86254	SCRNASEQ: Scaffa_34417156_ranked, RNASEQ: Hirani_37876024
LRRN2	0	0	0	0	0	0	0	0	0	0	0	0	0	0	0	0	0	0	0	0	0	0	0	0	0	0	0	0	1.45088	0	0	1.36169	1.41023	1.40763	1.4088	0	2.86111	SCRNASEQ: Hurskainen_33692365_endothelial, RNASEQ: Hirani_37876024
TNNT2	0	0	0	0	0	0	0	0	0	0	0	0	0	1.45139	1.4427	0	0	0	0	0	0	0	0	0	0	0	0	0	0	0	0	0	1.40968	1.40704	1.40815	0	2.86107	SCRNASEQ: Hurskainen_33692365_endothelial, RNASEQ: Al_mudares_37368978_female
MGAT1	0	0	0	0	0	0	0	0	0	0	0	0	0	0	0	0	0	0	0	0	0	0	0	0	0	0	0	0	1.42088	0	0	0	0	0	0	1.44013	2.86101	SCRNASEQ: Scaffa_34417156_ranked, RNASEQ: Hirani_37876024
ZNF451	0	0	0	0	0	0	0	0	0	0	0	0	0	1.4447	0	0	0	0	0	0	0	0	0	0	0	0	0	0	0	0	0	0	1.41606	1.41344	1.41554	0	2.86076	SCRNASEQ: Hurskainen_33692365_endothelial, RNASEQ: Al_mudares_37368978_female
IL1RL2	0	0	0	0	0	0	0	0	0	0	0	0	0	0	1.44454	0	0	0	0	0	0	0	0	0	0	0	0	0	0	0	0	0	1.4154	1.4128	1.41479	0	2.85994	SCRNASEQ: Hurskainen_33692365_endothelial, RNASEQ: Al_mudares_37368978_male
METTL21EP	0	0	0	0	0	0	0	0	0	0	0	0	0	0	1.44437	0	0	0	0	0	0	0	0	0	0	0	0	0	0	0	0	0	1.41511	1.41252	1.41447	0	2.85948	SCRNASEQ: Hurskainen_33692365_endothelial, RNASEQ: Al_mudares_37368978_male
GSTA3	0	0	0	0	0	0	0	0	0	0	0	0	0	1.44117	1.44303	0	0	0	0	0	0	0	0	0	0	0	0	0	1.42509	0	0	0	1.41624	1.41364	1.4158	0	2.85927	SCRNASEQ: Hurskainen_33692365_endothelial, RNASEQ: Al_mudares_37368978_male
UGGT1	0	0	0	0	0	0	0	0	0	0	0	0	0	0	1.44254	0	0	0	0	0	0	0	0	0	0	0	0	0	0	0	0	0	1.41592	1.41331	1.41539	0	2.85846	SCRNASEQ: Hurskainen_33692365_endothelial, RNASEQ: Al_mudares_37368978_male
TNS1	0	0	0	0	0	0	0	0	0	0	0	0	0	0	1.44467	0	0	0	0	0	0	0	0	0	0	0	0	0	0	0	0	0	1.41358	1.41098	1.41267	0	2.85825	SCRNASEQ: Hurskainen_33692365_endothelial, RNASEQ: Al_mudares_37368978_male
IGFBP2	0	0	0	0	0	0	0	0	0	0	0	0	0	0	1.44428	0	0	0	0	0	0	0	0	0	0	0	0	0	1.42386	0	0	1.36167	1.41361	1.411	1.4127	0	2.85789	SCRNASEQ: Hurskainen_33692365_endothelial, RNASEQ: Al_mudares_37368978_male
DNAJB2	0	0	0	0	0	0	0	0	0	0	0	0	0	0	1.44465	0	0	0	0	0	0	0	0	0	0	0	0	0	1.42286	0	0	0	1.4131	1.41051	1.41212	0	2.85775	SCRNASEQ: Hurskainen_33692365_endothelial, RNASEQ: Al_mudares_37368978_male
LMBRD1	0	0	0	0	0	0	0	0	0	0	0	0	0	1.44152	0	0	0	0	0	0	0	0	0	0	0	0	0	0	0	0	0	0	1.41614	1.41352	1.41565	0	2.85765	SCRNASEQ: Hurskainen_33692365_endothelial, RNASEQ: Al_mudares_37368978_female
TUBB2A	0	0	0	0	0	0	0	0	0	0	0	0	0	0	0	0	0	0	0	0	0	0	0	0	0	0	0	0	0	0	0	1.41143	0	0	0	1.44613	2.85756	SCRNASEQ: Scaffa_34417156_ranked, RNASEQ: Rao_37310763_ranked
CARD9	0	0	0	0	0	0	0	0	0	0	0	0	0	0	0	0	0	0	0	0	0	0	0	0	0	0	0	0	1.45341	0	0	0	1.40348	1.40099	1.40091	0	2.85689	SCRNASEQ: Hurskainen_33692365_endothelial, RNASEQ: Hirani_37876024
ADAMTS13	0	0	0	0	0	0	0	0	0	0	0	0	0	0	0	0	0	0	0	0	0	0	0	0	0	0	0	0	0	0	0	1.45318	1.40325	1.40076	1.40063	0	2.85642	SCRNASEQ: Hurskainen_33692365_endothelial, RNASEQ: Rao_37310763_ranked
PACC1	0	0	0	0	0	0	0	0	0	0	0	0	0	0	0	0	0	0	0	0	0	0	0	0	0	0	0	0	1.45067	0	0	0	1.40567	1.40317	1.40341	0	2.85633	SCRNASEQ: Hurskainen_33692365_endothelial, RNASEQ: Hirani_37876024
COQ10B	0	0	0	0	0	0	0	0	0	0	0	0	0	0	0	0	0	0	0	0	0	0	0	0	0	0	0	0	1.4416	0	0	0	1.41469	1.41211	1.414	0	2.85629	SCRNASEQ: Hurskainen_33692365_endothelial, RNASEQ: Hirani_37876024
ABI1	0	0	0	0	0	0	0	0	0	0	0	0	0	1.45161	0	0	0	0	0	0	0	0	0	0	0	0	0	0	0	0	0	0	1.40432	1.40183	1.40185	0	2.85593	SCRNASEQ: Hurskainen_33692365_endothelial, RNASEQ: Al_mudares_37368978_female
AGAP1	0	0	0	0	0	0	0	0	0	0	0	0	0	0	1.44378	0	0	0	0	0	0	0	0	0	0	0	0	0	1.42965	0	0	0	1.41206	1.40943	1.41093	0	2.85584	SCRNASEQ: Hurskainen_33692365_endothelial, RNASEQ: Al_mudares_37368978_male
QSOX1	0	0	0	0	0	0	0	0	0	0	0	0	0	1.44699	0	0	0	0	0	0	0	0	0	0	0	0	0	0	0	0	1.37591	1.44092	1.40882	1.40624	1.40715	0	2.85581	SCRNASEQ: Hurskainen_33692365_endothelial, RNASEQ: Al_mudares_37368978_female
CEP170	0	0	0	0	0	0	0	0	0	0	0	0	0	1.44903	0	0	0	0	0	0	0	0	0	0	0	0	0	0	0	0	0	0	1.40672	1.4042	1.40463	0	2.85575	SCRNASEQ: Hurskainen_33692365_endothelial, RNASEQ: Al_mudares_37368978_female
LRRFIP1	0	0	0	0	0	0	0	0	0	0	0	0	0	0	0	0	0	0	0	0	0	0	0	0	0	0	0	0	1.4436	0	0	0	1.41195	1.40933	1.41082	0	2.85555	SCRNASEQ: Hurskainen_33692365_endothelial, RNASEQ: Hirani_37876024
ODR4	0	0	0	0	0	0	0	0	0	0	0	0	0	1.44604	0	0	0	0	0	0	0	0	0	0	0	0	0	0	0	0	0	1.41514	1.4093	1.40666	1.40767	0	2.85534	SCRNASEQ: Hurskainen_33692365_endothelial, RNASEQ: Al_mudares_37368978_female
ADORA1	0	0	0	0	0	0	0	0	0	0	0	0	0	0	0	0	0	0	0	0	0	0	0	0	0	0	0	0	1.44531	0	0	0	1.41002	1.40737	1.40853	0	2.85533	SCRNASEQ: Hurskainen_33692365_endothelial, RNASEQ: Hirani_37876024
PHLPP1	0	0	0	0	0	0	0	0	0	0	0	0	0	0	1.44364	0	0	0	0	0	0	0	0	0	0	0	0	0	0	0	0	0	1.41127	1.40864	1.41002	0	2.85491	SCRNASEQ: Hurskainen_33692365_endothelial, RNASEQ: Al_mudares_37368978_male
PLEKHA6	0	0	0	0	0	0	0	0	0	0	0	0	0	0	0	0	0	0	0	0	0	0	0	0	0	0	0	0	1.44457	0	0	0	1.41018	1.40757	1.40874	0	2.85474	SCRNASEQ: Hurskainen_33692365_endothelial, RNASEQ: Hirani_37876024
ARMC9	0	0	0	0	0	0	0	0	0	0	0	0	0	1.44197	0	0	0	0	0	0	0	0	0	0	0	0	0	0	0	0	0	0	1.4124	1.40982	1.41138	0	2.85437	SCRNASEQ: Hurskainen_33692365_endothelial, RNASEQ: Al_mudares_37368978_female
GALNT3	0	0	0	0	0	0	0	0	0	0	0	0	0	0	0	0	0	0	0	0	0	0	0	0	0	0	0	0	1.45394	0	0	0	1.40031	1.39791	1.39728	0	2.85425	SCRNASEQ: Hurskainen_33692365_endothelial, RNASEQ: Hirani_37876024
PHF21A	0	0	0	0	0	0	0	0	0	0	0	0	0	0	0	0	0	0	0	0	0	0	0	0	0	0	0	0	1.45584	0	0	1.40886	1.39829	1.39594	1.39494	0	2.85413	SCRNASEQ: Hurskainen_33692365_endothelial, RNASEQ: Hirani_37876024
SSTR4	0	0	0	0	0	0	0	0	0	0	0	0	0	0	0	0	0	0	0	0	0	1.46029	0	0	0	0	0	0	1.43558	0	0	0	1.39382	0	1.38978	0	2.8541	SCRNASEQ: Hurskainen_33692365_endothelial, RNASEQ: Coarfa_28818871_male_down_day21
GATA3	0	0	0	0	0	0	0	0	0	0	0	0	0	0	0	0	0	0	0	0	0	0	0	0	0	0	0	0	1.44907	0	0	0	1.40496	1.40247	1.40259	0	2.85403	SCRNASEQ: Hurskainen_33692365_endothelial, RNASEQ: Hirani_37876024
TMEM163	0	0	0	0	0	0	0	0	0	0	0	0	0	0	0	0	0	0	0	0	0	0	0	0	0	0	0	0	1.44312	0	0	0	1.41082	1.40821	1.40948	0	2.85394	SCRNASEQ: Hurskainen_33692365_endothelial, RNASEQ: Hirani_37876024
VASP	0	0	0	0	0	0	0	0	0	0	0	0	0	0	0	0	0	0	0	0	0	0	0	0	0	0	0	0	0	0	0	1.41277	0	0	0	1.44115	2.85392	SCRNASEQ: Scaffa_34417156_ranked, RNASEQ: Rao_37310763_ranked
KCTD12	0	0	0	0	0	0	0	0	0	0	0	0	0	0	0	0	0	0	0	0	0	0	0	0	0	0	0	0	0	0	0	1.40609	0	0	0	1.44769	2.85378	SCRNASEQ: Scaffa_34417156_ranked, RNASEQ: Rao_37310763_ranked
TMCC2	0	0	0	0	0	0	0	0	0	0	0	0	0	0	1.44331	0	0	0	0	0	0	0	0	0	0	0	0	0	0	0	0	0	1.41028	1.40769	1.40887	0	2.85359	SCRNASEQ: Hurskainen_33692365_endothelial, RNASEQ: Al_mudares_37368978_male
ZNF207	0	0	0	0	0	0	0	0	0	0	0	0	0	0	0	0	0	0	0	0	0	0	0	0	0	0	0	0	0	0	0	1.40559	0	0	0	1.44785	2.85343	SCRNASEQ: Scaffa_34417156_ranked, RNASEQ: Rao_37310763_ranked
SCYL3	0	0	0	0	0	0	0	0	0	0	0	0	0	1.4451	0	0	0	0	0	0	0	0	0	0	0	0	0	0	0	0	0	0	1.40822	1.4056	1.40637	0	2.85332	SCRNASEQ: Hurskainen_33692365_endothelial, RNASEQ: Al_mudares_37368978_female
CNNM4	0	0	0	0	0	0	0	0	0	0	0	0	0	0	0	0	0	0	0	0	0	0	0	0	0	0	0	0	1.43729	0	0	0	1.41585	1.41324	1.41531	0	2.85314	SCRNASEQ: Hurskainen_33692365_endothelial, RNASEQ: Hirani_37876024
LAMC2	0	0	0	0	0	0	0	0	0	0	0	0	0	0	1.44406	0	0	0	0	0	0	0	0	0	0	0	0	0	0	0	0	0	1.40905	1.40643	1.4074	0	2.85311	SCRNASEQ: Hurskainen_33692365_endothelial, RNASEQ: Al_mudares_37368978_male
SFMBT2	0	0	0	0	0	0	0	0	0	0	0	0	0	1.44788	0	0	0	0	0	0	0	0	0	0	0	0	0	0	0	0	0	0	1.40488	1.40239	1.4025	0	2.85276	SCRNASEQ: Hurskainen_33692365_endothelial, RNASEQ: Al_mudares_37368978_female
XRCC5	0	0	0	0	0	0	0	0	0	0	0	0	0	0	0	0	0	0	0	0	0	0	0	0	0	0	0	0	1.43885	0	0	0	1.41366	1.41105	1.41276	0	2.85251	SCRNASEQ: Hurskainen_33692365_endothelial, RNASEQ: Hirani_37876024
CYB5R1	0	0	0	0	0	0	0	0	0	0	0	0	0	0	0	0	0	0	0	0	0	0	0	0	0	0	0	0	1.44251	0	0	0	1.40998	1.40733	1.40848	0	2.85249	SCRNASEQ: Hurskainen_33692365_endothelial, RNASEQ: Hirani_37876024
PRR13	0	0	0	0	0	0	0	0	0	0	0	0	0	0	0	0	0	0	0	0	0	0	0	0	0	0	0	0	0	0	0	1.4046	0	0	0	1.44772	2.85232	SCRNASEQ: Scaffa_34417156_ranked, RNASEQ: Rao_37310763_ranked
TMEM9	0	0	0	0	0	0	0	0	0	0	0	0	0	1.44227	0	0	0	0	0	0	0	0	0	0	0	0	0	0	0	0	0	1.36195	1.40966	1.40703	1.40813	0	2.85193	SCRNASEQ: Hurskainen_33692365_endothelial, RNASEQ: Al_mudares_37368978_female
LGR6	0	0	0	0	0	0	0	0	0	0	0	0	0	0	0	0	0	0	0	0	0	0	0	0	0	0	0	0	0	0	0	1.44183	1.40987	1.40723	1.40837	0	2.8517	SCRNASEQ: Hurskainen_33692365_endothelial, RNASEQ: Rao_37310763_ranked
BMF	0	0	0	0	0	0	0	0	0	0	0	0	0	1.44609	0	0	0	0	0	0	0	0	0	0	0	0	0	0	1.45477	0	0	0	1.39693	1.39468	1.39337	0	2.8517	SCRNASEQ: Hurskainen_33692365_endothelial, RNASEQ: Hirani_37876024
PDLIM5	0	0	0	0	0	0	0	0	0	0	0	0	0	0	0	0	0	0	0	0	0	0	0	0	0	0	0	0	0	0	0	1.40285	0	0	0	1.44873	2.85158	SCRNASEQ: Scaffa_34417156_ranked, RNASEQ: Rao_37310763_ranked
HTR2B	0	0	0	0	0	0	0	0	0	0	0	0	0	0	0	0	0	0	0	0	0	0	0	0	0	0	0	0	1.43907	0	0	0	1.41241	1.40983	1.41139	0	2.85148	SCRNASEQ: Hurskainen_33692365_endothelial, RNASEQ: Hirani_37876024
RALGDS	0	0	0	0	0	0	0	0	0	0	0	0	0	0	0	0	0	0	0	0	0	0	0	0	0	0	0	0	1.4483	0	0	1.39362	1.40305	1.40057	1.40035	0	2.85134	SCRNASEQ: Hurskainen_33692365_endothelial, RNASEQ: Hirani_37876024
PRRX1	0	0	0	0	0	0	0	0	0	0	0	0	0	0	1.44292	0	0	0	0	0	0	0	0	0	0	0	0	0	0	0	0	0	1.40826	1.40565	1.40641	0	2.85117	SCRNASEQ: Hurskainen_33692365_endothelial, RNASEQ: Al_mudares_37368978_male
ITPKB	0	0	0	0	0	0	0	0	0	0	0	0	0	0	1.44461	0	0	0	0	0	0	0	0	0	0	0	0	0	0	0	0	0	1.40648	1.40397	1.40435	0	2.85109	SCRNASEQ: Hurskainen_33692365_endothelial, RNASEQ: Al_mudares_37368978_male
OPTN	0	0	0	0	0	0	0	0	0	0	0	0	0	0	0	0	0	0	0	0	0	0	0	0	0	0	0	0	1.44588	0	0	0	1.40511	1.40262	1.40276	0	2.85099	SCRNASEQ: Hurskainen_33692365_endothelial, RNASEQ: Hirani_37876024
TOR3A	0	0	0	0	0	0	0	0	0	0	0	0	0	0	0	0	0	0	0	0	0	0	0	0	0	0	0	0	1.442	0	0	0	1.4087	1.40612	1.407	0	2.8507	SCRNASEQ: Hurskainen_33692365_endothelial, RNASEQ: Hirani_37876024
NDFIP1	0	0	0	0	0	0	0	0	0	0	0	0	0	0	0	0	0	0	0	0	0	0	0	0	0	0	0	0	0	0	0	1.40592	0	0	0	1.44478	2.8507	SCRNASEQ: Scaffa_34417156_ranked, RNASEQ: Rao_37310763_ranked
ARHGAP30	0	0	0	0	0	0	0	0	0	0	0	0	0	0	1.44336	0	0	0	0	0	0	0	0	0	0	0	0	0	0	0	0	0	1.40727	1.40471	1.4053	0	2.85063	SCRNASEQ: Hurskainen_33692365_endothelial, RNASEQ: Al_mudares_37368978_male
PHYH	0	0	0	0	0	0	0	0	0	0	0	0	0	0	0	0	0	0	0	0	0	0	0	0	0	0	0	0	1.44548	0	0	0	1.40514	1.40264	1.4028	0	2.85062	SCRNASEQ: Hurskainen_33692365_endothelial, RNASEQ: Hirani_37876024
ARFGEF1	0	0	0	0	0	0	0	0	0	0	0	0	0	0	0	0	0	0	0	0	0	0	0	0	0	0	0	0	1.43374	0	0	0	1.41669	1.41405	1.41629	0	2.85043	SCRNASEQ: Hurskainen_33692365_endothelial, RNASEQ: Hirani_37876024
NFKBIA	0	0	0	0	0	0	0	0	0	0	0	0	0	0	0	0	0	0	0	0	0	0	0	0	0	0	0	0	0	0	0	1.40976	0	0	0	1.44048	2.85024	SCRNASEQ: Scaffa_34417156_ranked, RNASEQ: Rao_37310763_ranked
RRS1	0	0	0	0	0	0	0	0	0	0	0	0	0	0	0	0	0	0	0	0	0	0	0	0	0	0	0	0	1.433	0	0	0	1.41682	1.41419	1.41645	0	2.84982	SCRNASEQ: Hurskainen_33692365_endothelial, RNASEQ: Hirani_37876024
CYP27A1	0	0	0	0	0	0	0	0	0	0	0	0	0	0	0	0	0	0	0	0	0	0	0	0	0	0	0	0	1.43634	0	0	0	1.41332	1.41071	1.41237	0	2.84966	SCRNASEQ: Hurskainen_33692365_endothelial, RNASEQ: Hirani_37876024
RXRG	0	0	0	0	0	0	0	0	0	0	0	0	0	0	0	0	0	0	0	0	0	0	0	0	0	0	0	0	1.44183	0	0	0	1.40777	0	1.40587	0	2.8496	SCRNASEQ: Hurskainen_33692365_endothelial, RNASEQ: Hirani_37876024
WDR75	0	0	0	0	0	0	0	0	0	0	0	0	0	0	0	0	0	0	0	0	0	0	0	0	0	0	0	0	1.43433	0	0	0	1.41506	1.41247	1.41441	0	2.84939	SCRNASEQ: Hurskainen_33692365_endothelial, RNASEQ: Hirani_37876024
FMOD	0	0	0	0	0	0	0	0	0	0	0	0	0	0	0	0	0	0	0	0	0	0	0	0	0	0	0	0	1.43873	0	0	1.36173	1.41006	1.40743	1.40858	0	2.84879	SCRNASEQ: Hurskainen_33692365_endothelial, RNASEQ: Hirani_37876024
AIDA	0	0	0	0	0	0	0	0	0	0	0	0	0	0	1.44251	0	0	0	0	0	0	0	0	0	0	0	0	0	0	0	0	1.36391	1.40614	1.40363	1.40393	0	2.84864	SCRNASEQ: Hurskainen_33692365_endothelial, RNASEQ: Al_mudares_37368978_male
ITLN1	0	0	0	0	0	0	0	0	0	0	0	0	0	1.44331	0	0	0	0	0	0	0	0	0	0	0	0	0	0	0	0	0	0	0	0	1.40522	0	2.84853	RNASEQ: Al_mudares_37368978_female, SCRNASEQ: Hurskainen_33692365_stroma
SPINT1	0	0	0	0	0	0	0	0	0	0	0	0	0	0	1.44361	0	0	0	0	0	0	0	0	0	0	0	0	0	1.45147	0	0	0	1.39666	1.39441	1.39305	0	2.84813	SCRNASEQ: Hurskainen_33692365_endothelial, RNASEQ: Hirani_37876024
UQCC1	0	0	0	0	0	0	0	0	0	0	0	0	0	1.45539	0	0	0	0	0	0	0	0	0	0	0	0	0	0	0	0	0	1.36179	1.39259	1.39041	1.38829	0	2.84798	SCRNASEQ: Hurskainen_33692365_endothelial, RNASEQ: Al_mudares_37368978_female
HLX	0	0	0	0	0	0	0	0	0	0	0	0	0	0	0	0	0	0	0	0	0	0	0	0	0	0	0	0	1.44186	0	0	0	1.40606	1.40355	1.40385	0	2.84792	SCRNASEQ: Hurskainen_33692365_endothelial, RNASEQ: Hirani_37876024
FJX1	0	0	0	0	0	0	0	0	0	0	0	0	0	1.44997	1.44403	0	0	0	0	0	0	0	0	0	0	0	0	0	0	0	0	0	1.39792	1.39559	1.3945	0	2.84789	SCRNASEQ: Hurskainen_33692365_endothelial, RNASEQ: Al_mudares_37368978_female
ATIC	0	0	0	0	0	0	0	0	0	0	0	0	0	0	0	0	0	0	0	0	0	0	0	0	0	0	0	0	1.43391	0	0	1.36184	1.41372	1.41112	1.41283	0	2.84762	SCRNASEQ: Hurskainen_33692365_endothelial, RNASEQ: Hirani_37876024
ADAMTSL2	0	0	0	0	0	0	0	0	0	0	0	0	0	0	1.44427	0	0	0	0	0	0	0	0	0	0	0	0	0	0	0	0	0	1.40321	1.40072	1.40057	0	2.84748	SCRNASEQ: Hurskainen_33692365_endothelial, RNASEQ: Al_mudares_37368978_male
APBB1IP	0	0	0	0	0	0	0	0	0	0	0	0	0	1.44276	0	0	0	0	0	0	0	0	0	0	0	0	0	0	0	0	0	0	1.40435	1.40185	1.40188	0	2.84711	SCRNASEQ: Hurskainen_33692365_endothelial, RNASEQ: Al_mudares_37368978_female
SLC23A1	0	0	0	0	0	0	0	0	0	0	0	0	0	0	0	0	0	0	0	0	0	0	0	0	0	0	0	0	1.45209	0	0	1.36304	1.39456	1.39234	1.39065	0	2.84665	SCRNASEQ: Hurskainen_33692365_endothelial, RNASEQ: Hirani_37876024
DSTYK	0	0	0	0	0	0	0	0	0	0	0	0	0	0	0	0	0	0	0	0	0	0	0	0	0	0	0	0	1.43618	0	0	0	1.41027	1.40768	1.40886	0	2.84645	SCRNASEQ: Hurskainen_33692365_endothelial, RNASEQ: Hirani_37876024
GARNL3	0	0	0	0	0	0	0	0	0	0	0	0	0	0	1.44433	0	0	0	0	0	0	0	0	0	0	0	0	0	1.42433	0	0	0	1.40175	1.39933	1.39892	0	2.84607	SCRNASEQ: Hurskainen_33692365_endothelial, RNASEQ: Al_mudares_37368978_male
CNTRL	0	0	0	0	0	0	0	0	0	0	0	0	0	0	1.44452	0	0	0	0	0	0	0	0	0	0	0	0	0	0	0	0	1.3625	1.40151	1.39909	1.39865	0	2.84603	SCRNASEQ: Hurskainen_33692365_endothelial, RNASEQ: Al_mudares_37368978_male
TRAF5	0	0	0	0	0	0	0	0	0	0	0	0	0	0	0	0	0	0	0	0	0	0	0	0	0	0	0	0	1.44037	0	0	0	1.40556	1.40306	1.4033	0	2.84593	SCRNASEQ: Hurskainen_33692365_endothelial, RNASEQ: Hirani_37876024
DDR2	0	0	0	0	0	0	0	0	0	0	0	0	0	0	0	0	0	0	0	0	0	0	0	0	0	0	0	0	1.43815	0	0	0	1.40769	1.40513	1.40577	0	2.84584	SCRNASEQ: Hurskainen_33692365_endothelial, RNASEQ: Hirani_37876024
KCNH1	0	0	0	0	0	0	0	0	0	0	0	0	0	0	0	0	0	0	0	0	0	0	0	0	0	0	0	0	0	0	0	1.44003	1.40553	1.40304	1.40327	0	2.84556	SCRNASEQ: Hurskainen_33692365_endothelial, RNASEQ: Rao_37310763_ranked
RNASEL	0	0	0	0	0	0	0	0	0	0	0	0	0	0	0	0	0	0	0	0	0	0	0	0	0	0	0	0	1.43653	0	0	0	1.40897	1.40635	1.40729	0	2.84549	SCRNASEQ: Hurskainen_33692365_endothelial, RNASEQ: Hirani_37876024
PLEKHB2	0	0	0	0	0	0	0	0	0	0	0	0	0	0	0	0	0	0	0	0	0	0	0	0	0	0	0	0	1.42936	0	0	0	1.41595	1.41333	1.41542	0	2.84531	SCRNASEQ: Hurskainen_33692365_endothelial, RNASEQ: Hirani_37876024
FAM163B	0	0	0	0	0	0	0	0	0	0	0	0	0	0	1.44466	0	0	0	0	0	0	0	0	0	0	0	0	0	0	0	0	0	0	0	1.40056	0	2.84522	SCRNASEQ: Hurskainen_33692365_stroma, RNASEQ: Al_mudares_37368978_male
ALOX5AP	0	0	0	0	0	0	0	0	0	0	0	0	0	0	0	0	0	0	0	0	0	0	0	0	0	0	0	0	0	0	0	1.39706	0	0	0	1.44796	2.84502	SCRNASEQ: Scaffa_34417156_ranked, RNASEQ: Rao_37310763_ranked
TIMM17A	0	0	0	0	0	0	0	0	0	0	0	0	0	0	0	0	0	0	0	0	0	0	0	0	0	0	0	0	1.43514	0	0	0	1.4098	1.40715	1.40828	0	2.84494	SCRNASEQ: Hurskainen_33692365_endothelial, RNASEQ: Hirani_37876024
PHLDA1	0	0	0	0	0	0	0	0	0	0	0	0	0	0	0	0	0	0	0	0	0	0	0	0	0	0	0	0	0	0	0	1.39871	0	0	0	1.44602	2.84473	SCRNASEQ: Scaffa_34417156_ranked, RNASEQ: Rao_37310763_ranked
TNFRSF11A	0	0	0	0	0	0	0	0	0	0	0	0	0	0	0	0	0	0	0	0	0	0	0	0	0	0	0	0	1.43325	0	0	0	1.4113	1.40867	1.41005	0	2.84455	SCRNASEQ: Hurskainen_33692365_endothelial, RNASEQ: Hirani_37876024
MREG	0	0	0	0	0	0	0	0	0	0	0	0	0	0	0	0	0	0	0	0	0	0	0	0	0	0	0	0	1.43083	0	0	0	1.41369	1.41109	1.4128	0	2.84452	SCRNASEQ: Hurskainen_33692365_endothelial, RNASEQ: Hirani_37876024
OGFRL1	0	0	0	0	0	0	0	0	0	0	0	0	0	0	0	0	0	0	0	0	0	0	0	0	0	0	0	0	1.4281	0	0	1.36217	1.4162	1.4136	1.41574	0	2.8443	SCRNASEQ: Hurskainen_33692365_endothelial, RNASEQ: Hirani_37876024
KLHDC8A	0	0	0	0	0	0	0	0	0	0	0	0	0	0	0	0	0	0	0	0	0	0	0	0	0	0	0	0	1.43398	0	0	0	1.41031	1.40771	1.4089	0	2.84429	SCRNASEQ: Hurskainen_33692365_endothelial, RNASEQ: Hirani_37876024
CERS6	0	0	0	0	0	0	0	0	0	0	0	0	0	0	1.44375	0	0	0	0	0	0	0	0	0	0	0	0	0	0	0	0	0	1.40022	1.39783	1.39717	0	2.84397	SCRNASEQ: Hurskainen_33692365_endothelial, RNASEQ: Al_mudares_37368978_male
NOXA1	0	0	0	0	0	0	0	0	0	0	0	0	0	0	0	0	0	0	0	0	0	0	0	0	0	0	0	0	1.43975	0	0	0	1.40407	1.40157	1.40157	0	2.84383	SCRNASEQ: Hurskainen_33692365_endothelial, RNASEQ: Hirani_37876024
TUBA4A	0	0	0	0	0	0	0	0	0	0	0	0	0	0	0	0	0	0	0	0	0	0	0	0	0	0	0	0	1.43039	0	0	0	1.41311	1.41052	1.41213	0	2.8435	SCRNASEQ: Hurskainen_33692365_endothelial, RNASEQ: Hirani_37876024
HJURP	0	0	0	0	0	0	0	0	0	0	0	0	0	0	0	0	0	0	0	0	0	0	0	0	0	0	0	0	1.43126	0	0	0	1.41211	1.40949	1.41099	0	2.84337	SCRNASEQ: Hurskainen_33692365_endothelial, RNASEQ: Hirani_37876024
LANCL1	0	0	0	0	0	0	0	0	0	0	0	0	0	0	0	0	0	0	0	0	0	0	0	0	0	0	0	0	1.42952	0	0	0	1.41377	1.41118	1.4129	0	2.84328	SCRNASEQ: Hurskainen_33692365_endothelial, RNASEQ: Hirani_37876024
BPNT1	0	0	0	0	0	0	0	0	0	0	0	0	0	0	0	0	0	0	0	0	0	0	0	0	0	0	0	0	1.43731	0	0	0	1.40597	1.40346	1.40374	0	2.84328	SCRNASEQ: Hurskainen_33692365_endothelial, RNASEQ: Hirani_37876024
COQ8A	0	0	0	0	0	0	0	0	0	0	0	0	0	0	0	0	0	0	0	0	0	0	0	0	0	0	0	0	1.43664	0	0	0	1.40651	1.40399	1.40438	0	2.84315	SCRNASEQ: Hurskainen_33692365_endothelial, RNASEQ: Hirani_37876024
CAMK1G	0	0	0	0	0	0	0	0	0	0	0	0	0	0	0	0	0	0	0	0	0	0	0	0	0	0	0	0	1.43763	0	0	1.36195	1.40539	1.4029	1.40311	0	2.84302	SCRNASEQ: Hurskainen_33692365_endothelial, RNASEQ: Hirani_37876024
SH2D3C	0	0	0	0	0	0	0	0	0	0	0	0	0	0	0	0	0	0	0	0	0	0	0	0	0	0	0	0	1.44089	0	0	0	1.40188	1.39946	1.39907	0	2.84277	SCRNASEQ: Hurskainen_33692365_endothelial, RNASEQ: Hirani_37876024
RGS4	0	0	0	0	0	0	0	0	0	0	0	0	0	0	0	0	0	0	0	0	0	0	0	0	0	0	0	0	1.43493	0	0	0	1.40772	1.40517	1.40582	0	2.84265	SCRNASEQ: Hurskainen_33692365_endothelial, RNASEQ: Hirani_37876024
FBXO3	0	0	0	0	0	0	0	0	0	0	0	0	0	0	1.44471	0	0	0	0	0	0	0	0	0	0	0	0	0	0	0	0	0	1.39775	1.39542	1.39431	0	2.84246	SCRNASEQ: Hurskainen_33692365_endothelial, RNASEQ: Al_mudares_37368978_male
TCF24	0	0	0	0	0	0	0	0	0	0	0	0	0	0	0	0	0	0	0	0	0	0	0	0	0	0	0	0	1.42608	0	0	0	0	1.4141	1.41635	0	2.84243	SCRNASEQ: Hurskainen_33692365_stroma, RNASEQ: Hirani_37876024
WDR12	0	0	0	0	0	0	0	0	0	0	0	0	0	0	0	0	0	0	0	0	0	0	0	0	0	0	0	0	1.42823	0	0	0	1.41419	1.41161	1.41341	0	2.84241	SCRNASEQ: Hurskainen_33692365_endothelial, RNASEQ: Hirani_37876024
SNHG6	0	0	0	0	0	0	0	0	0	0	0	0	0	0	0	0	0	0	0	0	0	0	0	0	0	0	0	0	1.42566	0	0	0	1.41674	1.41411	1.41636	0	2.8424	SCRNASEQ: Hurskainen_33692365_endothelial, RNASEQ: Hirani_37876024
TTN	0	0	0	0	0	0	0	0	0	0	0	0	0	0	1.44257	0	0	0	0	0	0	0	0	0	0	0	0	0	0	0	0	0	1.39939	1.39704	1.39627	0	2.84197	SCRNASEQ: Hurskainen_33692365_endothelial, RNASEQ: Al_mudares_37368978_male
RALGAPB	0	0	0	0	0	0	0	0	0	0	0	0	0	1.44982	0	0	0	0	0	0	0	0	0	0	0	0	0	0	0	0	0	0	1.39205	1.38989	0	0	2.84188	SCRNASEQ: Hurskainen_33692365_endothelial, RNASEQ: Al_mudares_37368978_female
NR1H3	0	0	0	0	0	0	0	0	0	0	0	0	0	0	1.44332	0	0	0	0	0	0	0	0	0	0	0	0	0	0	0	0	0	1.3985	1.39615	1.39517	0	2.84181	SCRNASEQ: Hurskainen_33692365_endothelial, RNASEQ: Al_mudares_37368978_male
SOAT1	0	0	0	0	0	0	0	0	0	0	0	0	0	0	0	0	0	0	0	0	0	0	0	0	0	0	0	0	1.43307	0	0	0	1.40873	1.40615	1.40703	0	2.8418	SCRNASEQ: Hurskainen_33692365_endothelial, RNASEQ: Hirani_37876024
BCL2L11	0	0	0	0	0	0	0	0	0	0	0	0	0	0	0	0	0	0	0	0	0	0	0	0	0	0	0	0	1.44649	0	0	0	1.39522	1.39296	1.39139	0	2.84172	SCRNASEQ: Hurskainen_33692365_endothelial, RNASEQ: Hirani_37876024
GOLT1A	0	0	0	0	0	0	0	0	0	0	0	0	0	0	0	0	0	0	0	0	0	0	0	0	0	0	0	0	1.43294	0	0	0	0	1.40756	1.40873	0	2.84167	SCRNASEQ: Hurskainen_33692365_stroma, RNASEQ: Hirani_37876024
HDHD2	0	0	0	0	0	0	0	0	0	0	0	0	0	0	0	0	0	0	0	0	0	0	0	0	0	0	0	0	0	0	0	1.39679	0	0	0	1.44472	2.84152	SCRNASEQ: Scaffa_34417156_ranked, RNASEQ: Rao_37310763_ranked
MEIS2	0	0	0	0	0	0	0	0	0	0	0	0	0	0	1.44432	0	0	0	0	0	0	0	0	0	0	0	0	0	0	0	0	0	1.39705	1.3948	1.3935	0	2.84137	SCRNASEQ: Hurskainen_33692365_endothelial, RNASEQ: Al_mudares_37368978_male
NDUFA10	0	0	0	0	0	0	0	0	0	0	0	0	0	0	0	0	0	0	0	0	0	0	0	0	0	0	0	0	1.42939	0	0	0	1.41178	1.40915	1.41061	0	2.84117	SCRNASEQ: Hurskainen_33692365_endothelial, RNASEQ: Hirani_37876024
PAMR1	0	0	0	0	0	0	0	0	0	0	0	0	0	0	1.44315	0	0	0	0	0	0	0	0	0	0	0	0	0	0	0	0	1.36921	1.39791	1.39557	1.39449	0	2.84106	SCRNASEQ: Hurskainen_33692365_endothelial, RNASEQ: Al_mudares_37368978_male
MYBPC3	0	0	0	0	0	0	0	0	0	0	0	0	0	0	1.44249	0	0	0	0	0	0	0	0	0	0	0	0	0	0	0	0	0	1.39852	1.39617	1.3952	0	2.84101	SCRNASEQ: Hurskainen_33692365_endothelial, RNASEQ: Al_mudares_37368978_male
ACP2	0	0	0	0	0	0	0	0	0	0	0	0	0	0	1.44248	0	0	0	0	0	0	0	0	0	0	0	0	0	0	0	0	0	1.39848	1.39613	1.39515	0	2.84097	SCRNASEQ: Hurskainen_33692365_endothelial, RNASEQ: Al_mudares_37368978_male
SPEG	0	0	0	0	0	0	0	0	0	0	0	0	0	0	0	0	0	0	0	0	0	0	0	0	0	0	0	0	1.42775	0	0	0	1.41303	1.41044	1.41205	0	2.84078	SCRNASEQ: Hurskainen_33692365_endothelial, RNASEQ: Hirani_37876024
PPIP5K1	0	0	0	0	0	0	0	0	0	0	0	0	0	0	0	0	0	0	0	0	0	0	0	0	0	0	0	0	1.44449	0	0	0	1.3961	1.39387	1.39242	0	2.84059	SCRNASEQ: Hurskainen_33692365_endothelial, RNASEQ: Hirani_37876024
UXS1	0	0	0	0	0	0	0	0	0	0	0	0	0	0	0	0	0	0	0	0	0	0	0	0	0	0	0	0	1.42533	0	0	0	1.4152	1.41261	1.41457	0	2.84054	SCRNASEQ: Hurskainen_33692365_endothelial, RNASEQ: Hirani_37876024
TMEM87A	0	0	0	0	0	0	0	0	0	0	0	0	0	0	1.44417	0	0	0	0	0	0	0	0	0	0	0	0	0	0	0	0	0	1.39637	1.39413	1.39272	0	2.84053	SCRNASEQ: Hurskainen_33692365_endothelial, RNASEQ: Al_mudares_37368978_male
SLCO5A1	0	0	0	0	0	0	0	0	0	0	0	0	0	0	0	0	0	0	0	0	0	0	0	0	0	0	0	0	1.42373	0	0	0	1.41664	0	1.41622	0	2.84037	SCRNASEQ: Hurskainen_33692365_endothelial, RNASEQ: Hirani_37876024
ANKRD45	0	0	0	0	0	0	0	0	0	0	0	0	0	0	0	0	0	0	0	0	0	0	0	0	0	0	0	0	1.43186	0	0	0	1.40844	1.40585	1.40667	0	2.8403	SCRNASEQ: Hurskainen_33692365_endothelial, RNASEQ: Hirani_37876024
ELF3	0	0	0	0	0	0	0	0	0	0	0	0	0	0	0	0	0	0	0	0	0	0	0	0	0	0	0	0	1.43044	0	0	0	1.40982	1.40718	1.40831	0	2.84026	SCRNASEQ: Hurskainen_33692365_endothelial, RNASEQ: Hirani_37876024
USF1	0	0	0	0	0	0	0	0	0	0	0	0	0	0	0	0	0	0	0	0	0	0	0	0	0	0	0	0	1.43296	0	0	0	1.40726	1.4047	1.40528	0	2.84021	SCRNASEQ: Hurskainen_33692365_endothelial, RNASEQ: Hirani_37876024
VPS39	0	0	0	0	0	0	0	0	0	0	0	0	0	0	1.44383	0	0	0	0	0	0	0	0	0	0	0	0	0	0	0	0	0	1.39638	1.39415	1.39273	0	2.84021	SCRNASEQ: Hurskainen_33692365_endothelial, RNASEQ: Al_mudares_37368978_male
ANKRD63	0	0	0	0	0	0	0	0	0	0	0	0	0	0	1.4433	0	0	0	0	0	0	0	0	0	0	0	0	0	1.42686	0	0	0	1.39691	0	1.39333	0	2.84021	SCRNASEQ: Hurskainen_33692365_endothelial, RNASEQ: Al_mudares_37368978_male
RABGAP1L	0	0	0	0	0	0	0	0	0	0	0	0	0	0	0	0	0	0	0	0	0	0	0	0	0	0	0	0	1.43155	0	0	0	1.40853	1.40594	1.40677	0	2.84009	SCRNASEQ: Hurskainen_33692365_endothelial, RNASEQ: Hirani_37876024
TNFSF18	0	0	0	0	0	0	0	0	0	0	0	0	0	0	0	0	0	0	0	0	0	0	0	0	0	0	0	0	1.43142	0	0	0	1.40841	1.40583	1.40663	0	2.83984	SCRNASEQ: Hurskainen_33692365_endothelial, RNASEQ: Hirani_37876024
CD247	0	0	0	0	0	0	0	0	0	0	0	0	0	0	0	0	0	0	0	0	0	0	0	0	0	0	0	0	1.43192	0	0	0	1.40791	1.40533	1.40603	0	2.83983	SCRNASEQ: Hurskainen_33692365_endothelial, RNASEQ: Hirani_37876024
GPSM1	0	0	0	0	0	0	0	0	0	0	0	0	0	0	0	0	0	0	0	0	0	0	0	0	0	0	0	0	1.43628	0	0	0	1.40351	1.40101	1.40093	0	2.83979	SCRNASEQ: Hurskainen_33692365_endothelial, RNASEQ: Hirani_37876024
GLUL	0	0	0	0	0	0	0	0	0	0	0	0	0	0	0	0	0	0	0	0	0	0	0	0	0	0	0	0	1.43061	0	0	1.36277	1.40894	1.40633	1.40727	0	2.83955	SCRNASEQ: Hurskainen_33692365_endothelial, RNASEQ: Hirani_37876024
NPHP1	0	0	0	0	0	0	0	0	0	0	0	0	0	0	1.44424	0	0	0	0	0	0	0	0	0	0	0	0	0	0	0	0	0	1.39526	1.393	1.39143	0	2.83951	SCRNASEQ: Hurskainen_33692365_endothelial, RNASEQ: Al_mudares_37368978_male
LRP4	0	0	0	0	0	0	0	0	0	0	0	0	0	0	0	0	0	0	0	0	0	0	0	0	0	0	0	0	0	0	0	1.39399	1.39842	1.39607	1.39508	1.44532	2.8393	SCRNASEQ: Scaffa_34417156_ranked, RNASEQ: Rao_37310763_ranked
SLC5A12	0	0	0	0	0	0	0	0	0	0	0	0	0	0	0	0	0	0	0	0	0	0	0	0	0	0	0	0	1.44149	0	0	0	1.39738	0	0	0	2.83887	SCRNASEQ: Hurskainen_33692365_endothelial, RNASEQ: Hirani_37876024
SCRN3	0	0	0	0	0	0	0	0	0	0	0	0	0	0	0	0	0	0	0	0	0	0	0	0	0	0	0	0	1.43891	0	0	1.39733	1.39971	1.39734	1.3966	0	2.83861	SCRNASEQ: Hurskainen_33692365_endothelial, RNASEQ: Hirani_37876024
MALL	0	0	0	0	0	0	0	0	0	0	0	0	0	0	1.44304	0	0	0	0	0	0	0	0	0	0	0	0	0	0	0	0	0	1.39528	1.39301	1.39144	0	2.83832	SCRNASEQ: Hurskainen_33692365_endothelial, RNASEQ: Al_mudares_37368978_male
BPIFA1	0	0	0	0	0	0	0	0	0	0	0	0	0	1.44535	1.44272	0	0	0	0	0	0	0	0	0	0	0	0	0	0	0	0	0	1.39296	1.39081	1.38875	0	2.83831	SCRNASEQ: Hurskainen_33692365_endothelial, RNASEQ: Al_mudares_37368978_female
NUAK2	0	0	0	0	0	0	0	0	0	0	0	0	0	0	0	0	0	0	0	0	0	0	0	0	0	0	0	0	1.428	0	0	0	1.4103	1.4077	1.40889	0	2.83829	SCRNASEQ: Hurskainen_33692365_endothelial, RNASEQ: Hirani_37876024
SLC4A11	0	0	0	0	0	0	0	0	0	0	0	0	0	0	0	0	0	0	0	0	0	0	0	0	0	0	0	0	0	0	0	1.44336	1.3948	1.39255	1.39091	0	2.83816	SCRNASEQ: Hurskainen_33692365_endothelial, RNASEQ: Rao_37310763_ranked
KIF21B	0	0	0	0	0	0	0	0	0	0	0	0	0	0	0	0	0	0	0	0	0	0	0	0	0	0	0	0	1.4285	0	0	0	1.40965	1.407	1.40812	0	2.83815	SCRNASEQ: Hurskainen_33692365_endothelial, RNASEQ: Hirani_37876024
FOXA2	0	0	0	0	0	0	0	0	0	0	0	0	0	0	0	0	0	0	0	0	0	0	0	0	0	0	0	0	1.4443	0	0	0	1.39383	1.39162	1.38979	0	2.83812	SCRNASEQ: Hurskainen_33692365_endothelial, RNASEQ: Hirani_37876024
RNF149	0	0	0	0	0	0	0	0	0	0	0	0	0	0	0	0	0	0	0	0	0	0	0	0	0	0	0	0	1.42243	0	0	1.40162	1.41546	1.41286	1.41487	0	2.8379	SCRNASEQ: Hurskainen_33692365_endothelial, RNASEQ: Hirani_37876024
ACBD5	0	0	0	0	0	0	0	0	0	0	0	0	0	0	0	0	0	0	0	0	0	0	0	0	0	0	0	0	1.43358	0	0	0	1.40431	1.40182	1.40183	0	2.83789	SCRNASEQ: Hurskainen_33692365_endothelial, RNASEQ: Hirani_37876024
SLC20A1	0	0	0	0	0	0	0	0	0	0	0	0	0	0	0	0	0	0	0	0	0	0	0	0	0	0	0	0	1.4426	0	0	0	1.39509	1.39283	1.39124	0	2.83769	SCRNASEQ: Hurskainen_33692365_endothelial, RNASEQ: Hirani_37876024
SNRPA	0	0	0	0	0	0	0	0	0	0	0	0	0	0	0	0	0	0	0	0	0	0	0	0	0	0	0	0	0	0	0	1.39562	0	0	0	1.44196	2.83758	SCRNASEQ: Scaffa_34417156_ranked, RNASEQ: Rao_37310763_ranked
TAGLN	0	0	0	0	0	0	0	0	0	0	0	0	0	0	0	0	0	0	0	0	0	0	0	0	0	0	0	0	0	0	0	1.38892	0	0	0	1.44858	2.8375	SCRNASEQ: Scaffa_34417156_ranked, RNASEQ: Rao_37310763_ranked
NSMF	0	0	0	0	0	0	0	0	0	0	0	0	0	0	0	0	0	0	0	0	0	0	0	0	0	0	0	0	1.4333	0	0	0	1.4041	1.4016	1.4016	0	2.8374	SCRNASEQ: Hurskainen_33692365_endothelial, RNASEQ: Hirani_37876024
KCNK2	0	0	0	0	0	0	0	0	0	0	0	0	0	0	0	0	0	0	0	0	0	0	0	0	0	0	0	0	1.43152	0	0	0	1.40585	1.40335	1.40361	0	2.83737	SCRNASEQ: Hurskainen_33692365_endothelial, RNASEQ: Hirani_37876024
MGST3	0	0	0	0	0	0	0	0	0	0	0	0	0	0	0	0	0	0	0	0	0	0	0	0	0	0	0	0	1.42953	0	0	0	1.40778	1.40522	1.40589	0	2.83731	SCRNASEQ: Hurskainen_33692365_endothelial, RNASEQ: Hirani_37876024
PSMF1	0	0	0	0	0	0	0	0	0	0	0	0	0	0	1.44347	0	0	0	0	0	0	0	0	0	0	0	0	0	0	0	0	1.37533	1.39347	1.39127	1.38934	0	2.83694	SCRNASEQ: Hurskainen_33692365_endothelial, RNASEQ: Al_mudares_37368978_male
UNC80	0	0	0	0	0	0	0	0	0	0	0	0	0	0	0	0	0	0	0	0	0	0	0	0	0	0	0	0	1.42305	0	0	0	1.41383	1.41124	1.41297	0	2.83688	SCRNASEQ: Hurskainen_33692365_endothelial, RNASEQ: Hirani_37876024
ACADL	0	0	0	0	0	0	0	0	0	0	0	0	0	0	0	0	0	0	0	0	0	0	0	0	0	0	0	0	1.42265	0	0	0	1.41379	1.41121	1.41293	0	2.83644	SCRNASEQ: Hurskainen_33692365_endothelial, RNASEQ: Hirani_37876024
NCK2	0	0	0	0	0	0	0	0	0	0	0	0	0	0	0	0	0	0	0	0	0	0	0	0	0	0	0	0	1.42118	0	0	0	1.41523	1.41263	1.4146	0	2.8364	SCRNASEQ: Hurskainen_33692365_endothelial, RNASEQ: Hirani_37876024
ZHX3	0	0	0	0	0	0	0	0	0	0	0	0	0	0	1.4444	0	0	0	0	0	0	0	0	0	0	0	0	0	0	0	0	0	1.39193	1.38976	0	0	2.83634	SCRNASEQ: Hurskainen_33692365_endothelial, RNASEQ: Al_mudares_37368978_male
ORMDL1	0	0	0	0	0	0	0	0	0	0	0	0	0	0	0	0	0	0	0	0	0	0	0	0	0	0	0	0	1.42136	0	0	0	1.41483	1.41225	1.41416	0	2.8362	SCRNASEQ: Hurskainen_33692365_endothelial, RNASEQ: Hirani_37876024
ABCA2	0	0	0	0	0	0	0	0	0	0	0	0	0	0	0	0	0	0	0	0	0	0	0	0	0	0	0	0	1.43238	0	0	0	1.4038	1.40129	1.40125	0	2.83618	SCRNASEQ: Hurskainen_33692365_endothelial, RNASEQ: Hirani_37876024
LMO2	0	0	0	0	0	0	0	0	0	0	0	0	0	0	0	0	0	0	0	0	0	0	0	0	0	0	0	0	1.43802	0	0	0	1.39776	1.39543	1.39433	0	2.83578	SCRNASEQ: Hurskainen_33692365_endothelial, RNASEQ: Hirani_37876024
TRAF3IP1	0	0	0	0	0	0	0	0	0	0	0	0	0	0	0	0	0	0	0	0	0	0	0	0	0	0	0	0	1.42383	0	0	0	1.41183	1.40921	1.41067	0	2.83567	SCRNASEQ: Hurskainen_33692365_endothelial, RNASEQ: Hirani_37876024
TMX2	0	0	0	0	0	0	0	0	0	0	0	0	0	0	0	0	0	0	0	0	0	0	0	0	0	0	0	0	1.43621	0	0	0	1.39906	1.39673	1.39592	0	2.83528	SCRNASEQ: Hurskainen_33692365_endothelial, RNASEQ: Hirani_37876024
EMC4	0	0	0	0	0	0	0	0	0	0	0	0	0	0	0	0	0	0	0	0	0	0	0	0	0	0	0	0	1.43789	0	0	1.36957	1.39723	1.39497	1.3937	0	2.83512	SCRNASEQ: Hurskainen_33692365_endothelial, RNASEQ: Hirani_37876024
EID1	0	0	0	0	0	0	0	0	0	0	0	0	0	0	0	0	0	0	0	0	0	0	0	0	0	0	0	0	0	0	0	1.38841	1.39568	1.39342	1.39189	1.44661	2.83502	SCRNASEQ: Scaffa_34417156_ranked, RNASEQ: Rao_37310763_ranked
C1orf226	0	0	0	0	0	0	0	0	0	0	0	0	0	0	0	0	0	0	0	0	0	0	0	0	0	0	0	0	1.42737	0	0	1.3617	1.40764	1.40508	1.40572	0	2.835	SCRNASEQ: Hurskainen_33692365_endothelial, RNASEQ: Hirani_37876024
KCNB1	0	0	0	0	0	0	0	0	0	0	0	0	0	0	1.44391	0	0	0	0	0	0	0	0	0	0	0	0	0	1.4379	0	0	1.38075	1.39107	1.3889	0	0	2.83497	SCRNASEQ: Hurskainen_33692365_endothelial, RNASEQ: Al_mudares_37368978_male
LAD1	0	0	0	0	0	0	0	0	0	0	0	0	0	0	0	0	0	0	0	0	0	0	0	0	0	0	0	0	1.42481	0	0	0	1.40969	1.40705	1.40816	0	2.8345	SCRNASEQ: Hurskainen_33692365_endothelial, RNASEQ: Hirani_37876024
ACIN1	0	0	0	0	0	0	0	0	0	0	0	0	0	0	0	0	0	0	0	0	0	0	0	0	0	0	0	0	0	0	0	1.38791	0	0	0	1.44637	2.83427	SCRNASEQ: Scaffa_34417156_ranked, RNASEQ: Rao_37310763_ranked
4833423E24Rik	0	0	0	0	0	0	0	0	0	0	0	0	0	0	0	0	0	0	0	0	0	0	0	0	0	0	0	0	1.43541	0	0	0	1.39885	1.39654	1.39567	0	2.83426	SCRNASEQ: Hurskainen_33692365_endothelial, RNASEQ: Hirani_37876024
IRF6	0	0	0	0	0	0	0	0	0	0	0	0	0	0	0	0	0	0	0	0	0	0	0	0	0	0	0	0	1.42877	0	0	0	1.40547	1.40298	1.40319	0	2.83424	SCRNASEQ: Hurskainen_33692365_endothelial, RNASEQ: Hirani_37876024
PEA15	0	0	0	0	0	0	0	0	0	0	0	0	0	0	0	0	0	0	0	0	0	0	0	0	0	0	0	0	1.42718	0	0	0	1.40705	1.40449	1.40502	0	2.83423	SCRNASEQ: Hurskainen_33692365_endothelial, RNASEQ: Hirani_37876024
ZER1	0	0	0	0	0	0	0	0	0	0	0	0	0	0	0	0	0	0	0	0	0	0	0	0	0	0	0	0	1.4309	0	0	0	1.40265	1.40021	1.39993	0	2.83355	SCRNASEQ: Hurskainen_33692365_endothelial, RNASEQ: Hirani_37876024
ARFGEF2	0	0	0	0	0	0	0	0	0	0	0	0	0	0	0	0	0	0	0	0	0	0	0	0	0	0	0	0	1.44242	0	0	0	1.39113	1.38896	0	0	2.83355	SCRNASEQ: Hurskainen_33692365_endothelial, RNASEQ: Hirani_37876024
PIK3C2B	0	0	0	0	0	0	0	0	0	0	0	0	0	0	0	0	0	0	0	0	0	0	0	0	0	0	0	0	1.42309	0	0	0	1.4102	1.4076	1.40877	0	2.83329	SCRNASEQ: Hurskainen_33692365_endothelial, RNASEQ: Hirani_37876024
ACCS	0	0	0	0	0	0	0	0	0	0	0	0	0	0	0	0	0	0	0	0	0	0	0	0	0	0	0	0	1.43504	0	0	0	1.3981	1.39576	1.39472	0	2.83314	SCRNASEQ: Hurskainen_33692365_endothelial, RNASEQ: Hirani_37876024
GSS	0	0	0	0	0	0	0	0	0	0	0	0	0	0	0	0	0	0	0	0	0	0	0	0	0	0	0	0	1.44044	0	0	0	1.39266	1.39052	1.3884	0	2.8331	SCRNASEQ: Hurskainen_33692365_endothelial, RNASEQ: Hirani_37876024
GPR39	0	0	0	0	0	0	0	0	0	0	0	0	0	0	0	0	0	0	0	0	0	0	0	0	0	0	0	0	1.42203	0	0	0	1.41087	1.40826	1.40954	0	2.83291	SCRNASEQ: Hurskainen_33692365_endothelial, RNASEQ: Hirani_37876024
SHF	0	0	0	0	0	0	0	0	0	0	0	0	0	0	0	0	0	0	0	0	0	0	0	0	0	0	0	0	1.43695	0	0	0	1.39587	1.39361	1.39211	0	2.83281	SCRNASEQ: Hurskainen_33692365_endothelial, RNASEQ: Hirani_37876024
LBR	0	0	0	0	0	0	0	0	0	0	0	0	0	0	0	0	0	0	0	0	0	0	0	0	0	0	0	0	1.42646	0	0	0	1.40628	1.40377	1.40409	0	2.83275	SCRNASEQ: Hurskainen_33692365_endothelial, RNASEQ: Hirani_37876024
GLE1	0	0	0	0	0	0	0	0	0	0	0	0	0	0	0	0	0	0	0	0	0	0	0	0	0	0	0	0	1.42972	0	0	0	1.40273	1.40029	1.40002	0	2.83245	SCRNASEQ: Hurskainen_33692365_endothelial, RNASEQ: Hirani_37876024
C1orf21	0	0	0	0	0	0	0	0	0	0	0	0	0	0	0	0	0	0	0	0	0	0	0	0	0	0	0	0	1.42316	0	0	0	1.40916	1.40653	1.40753	0	2.83233	SCRNASEQ: Hurskainen_33692365_endothelial, RNASEQ: Hirani_37876024
PMPCA	0	0	0	0	0	0	0	0	0	0	0	0	0	0	0	0	0	0	0	0	0	0	0	0	0	0	0	0	1.42804	0	0	0	1.40344	1.40095	1.40086	0	2.83148	SCRNASEQ: Hurskainen_33692365_endothelial, RNASEQ: Hirani_37876024
GCA	0	0	0	0	0	0	0	0	0	0	0	0	0	0	0	0	0	0	0	0	0	0	0	0	0	0	0	0	1.4308	0	0	0	1.4004	1.39799	1.3974	0	2.8312	SCRNASEQ: Hurskainen_33692365_endothelial, RNASEQ: Hirani_37876024
TLE3	0	0	0	0	0	0	0	0	0	0	0	0	0	0	0	0	0	0	0	0	0	0	0	0	0	0	0	0	0	0	0	1.38944	0	0	0	1.44175	2.83119	SCRNASEQ: Scaffa_34417156_ranked, RNASEQ: Rao_37310763_ranked
Bpifb5	0	0	0	0	0	0	0	0	0	0	0	0	0	0	0	0	0	0	0	0	0	0	0	0	0	0	0	0	1.43809	0	0	0	1.39293	1.39078	1.38872	0	2.83102	SCRNASEQ: Hurskainen_33692365_endothelial, RNASEQ: Hirani_37876024
NTNG2	0	0	0	0	0	0	0	0	0	0	0	0	0	0	0	0	0	0	0	0	0	0	0	0	0	0	0	0	1.42814	0	0	0	1.40288	0	1.40017	0	2.83102	SCRNASEQ: Hurskainen_33692365_endothelial, RNASEQ: Hirani_37876024
DNM3	0	0	0	0	0	0	0	0	0	0	0	0	0	0	0	0	0	0	0	0	0	0	0	0	0	0	0	0	1.42245	0	0	0	1.40836	1.40577	1.40656	0	2.83081	SCRNASEQ: Hurskainen_33692365_endothelial, RNASEQ: Hirani_37876024
SPAG6	0	0	0	0	0	0	0	0	0	0	0	0	0	0	0	0	0	0	0	0	0	0	0	0	0	0	0	0	1.42545	0	0	0	1.40447	1.40199	1.40202	0	2.82992	SCRNASEQ: Hurskainen_33692365_endothelial, RNASEQ: Hirani_37876024
PPP1R13B	0	0	0	0	0	0	0	0	0	0	0	0	0	0	0	0	0	0	0	0	0	0	0	0	0	0	0	0	0	0	0	1.42365	1.40622	1.4037	1.40402	0	2.82986	SCRNASEQ: Hurskainen_33692365_endothelial, RNASEQ: Rao_37310763_ranked
TRO	0	0	0	0	0	0	0	0	0	0	0	0	0	0	0	0	0	0	0	0	0	0	0	0	0	0	0	0	1.4208	0	0	0	1.40857	1.40598	1.40682	0	2.82938	SCRNASEQ: Hurskainen_33692365_endothelial, RNASEQ: Hirani_37876024
ITIH5	0	0	0	0	0	0	0	0	0	0	0	0	0	0	0	0	0	0	0	0	0	0	0	0	0	0	0	0	0	0	0	1.38636	1.40489	1.4024	1.40251	1.44286	2.82922	SCRNASEQ: Scaffa_34417156_ranked, RNASEQ: Rao_37310763_ranked
HBB	0	0	0	0	0	0	0	0	0	0	0	0	0	0	0	0	0	0	0	0	0	0	0	0	0	0	0	0	0	0	0	1.38046	0	0	0	1.44871	2.82918	SCRNASEQ: Scaffa_34417156_ranked, RNASEQ: Rao_37310763_ranked
FH	0	0	0	0	0	0	0	0	0	0	0	0	0	0	0	0	0	0	0	0	0	0	0	0	0	0	0	0	1.42218	0	0	0	1.4068	1.40426	1.4047	0	2.82897	SCRNASEQ: Hurskainen_33692365_endothelial, RNASEQ: Hirani_37876024
ST8SIA6	0	0	0	0	0	0	0	0	0	0	0	0	0	0	0	0	0	0	0	0	0	0	0	0	0	0	0	0	1.42408	0	0	0	1.40467	1.40219	1.40227	0	2.82874	SCRNASEQ: Hurskainen_33692365_endothelial, RNASEQ: Hirani_37876024
PLCB2	0	0	0	0	0	0	0	0	0	0	0	0	0	0	0	0	0	0	0	0	0	0	0	0	0	0	0	0	1.43183	0	0	0	1.39689	1.39464	1.39331	0	2.82872	SCRNASEQ: Hurskainen_33692365_endothelial, RNASEQ: Hirani_37876024
PROKR2	0	0	0	0	0	0	0	0	0	0	0	0	0	0	0	0	0	0	0	0	0	0	0	0	0	0	0	0	1.43403	0	0	0	1.39451	1.39229	1.39059	0	2.82854	SCRNASEQ: Hurskainen_33692365_endothelial, RNASEQ: Hirani_37876024
H2AJ	0	0	0	0	0	0	0	0	0	0	0	0	0	0	0	0	0	0	0	0	0	0	0	0	0	0	0	0	0	0	0	1.37942	0	0	0	1.44911	2.82854	SCRNASEQ: Scaffa_34417156_ranked, RNASEQ: Rao_37310763_ranked
TSPY26P	0	0	0	0	0	0	0	0	0	0	0	0	0	0	0	0	0	0	0	0	0	0	0	0	0	0	0	0	1.43516	0	0	0	1.39309	1.39092	1.38889	0	2.82825	SCRNASEQ: Hurskainen_33692365_endothelial, RNASEQ: Hirani_37876024
SLC1A2	0	0	0	0	0	0	0	0	0	0	0	0	0	0	0	0	0	0	0	0	0	0	0	0	0	0	0	0	1.42979	0	0	0	1.39789	1.39556	1.39447	0	2.82768	SCRNASEQ: Hurskainen_33692365_endothelial, RNASEQ: Hirani_37876024
TCF15	0	0	0	0	0	0	0	0	0	0	0	0	0	0	0	0	0	0	0	0	0	0	0	0	0	0	0	0	1.43395	0	0	0	1.39339	1.39119	1.38926	0	2.82735	SCRNASEQ: Hurskainen_33692365_endothelial, RNASEQ: Hirani_37876024
PKN3	0	0	0	0	0	0	0	0	0	0	0	0	0	0	0	0	0	0	0	0	0	0	0	0	0	0	0	0	0	0	0	1.42435	1.40268	1.40024	1.39996	0	2.82703	SCRNASEQ: Hurskainen_33692365_endothelial, RNASEQ: Rao_37310763_ranked
APOE	0	0	0	0	0	0	0	0	0	0	0	0	0	0	0	0	0	0	0	0	0	0	0	0	0	0	0	0	0	0	0	1.38004	0	0	0	1.44695	2.82699	SCRNASEQ: Scaffa_34417156_ranked, RNASEQ: Rao_37310763_ranked
DGKZ	0	0	0	0	0	0	0	0	0	0	0	0	0	0	0	0	0	0	0	0	0	0	0	0	0	0	0	0	1.4286	0	0	0	1.39831	1.39597	1.39497	0	2.82691	SCRNASEQ: Hurskainen_33692365_endothelial, RNASEQ: Hirani_37876024
ABTB2	0	0	0	0	0	0	0	0	0	0	0	0	0	0	0	0	0	0	0	0	0	0	0	0	0	0	0	0	1.429	0	0	0	1.3978	1.39547	1.39437	0	2.8268	SCRNASEQ: Hurskainen_33692365_endothelial, RNASEQ: Hirani_37876024
PTRH1	0	0	0	0	0	0	0	0	0	0	0	0	0	0	0	0	0	0	0	0	0	0	0	0	0	0	0	0	1.42491	0	0	0	1.40184	1.39942	1.39902	0	2.82674	SCRNASEQ: Hurskainen_33692365_endothelial, RNASEQ: Hirani_37876024
GALK2	0	0	0	0	0	0	0	0	0	0	0	0	0	0	0	0	0	0	0	0	0	0	0	0	0	0	0	0	1.43097	0	0	0	1.39564	1.39338	1.39185	0	2.82662	SCRNASEQ: Hurskainen_33692365_endothelial, RNASEQ: Hirani_37876024
PXMP4	0	0	0	0	0	0	0	0	0	0	0	0	0	0	0	0	0	0	0	0	0	0	0	0	0	0	0	0	1.43343	0	0	0	1.39284	1.39069	1.38862	0	2.82627	SCRNASEQ: Hurskainen_33692365_endothelial, RNASEQ: Hirani_37876024
SNX5	0	0	0	0	0	0	0	0	0	0	0	0	0	0	0	0	0	0	0	0	0	0	0	0	0	0	0	0	1.4319	0	0	0	1.39409	1.39188	1.3901	0	2.82599	SCRNASEQ: Hurskainen_33692365_endothelial, RNASEQ: Hirani_37876024
SRGN	0	0	0	0	0	0	0	0	0	0	0	0	0	0	0	0	0	0	0	0	0	0	0	0	0	0	0	0	0	0	1.37591	0	0	0	0	1.44992	2.82584	SCRNASEQ: Scaffa_34417156_ranked, RNASEQ: Nitkin_32753701_6hr_unranked
CCDC187	0	0	0	0	0	0	0	0	0	0	0	0	0	0	0	0	0	0	0	0	0	0	0	0	0	0	0	0	1.4222	0	0	0	1.40352	1.40103	1.40095	0	2.82573	SCRNASEQ: Hurskainen_33692365_endothelial, RNASEQ: Hirani_37876024
EGFL7	0	0	0	0	0	0	0	0	0	0	0	0	0	0	0	0	0	0	0	0	0	0	0	0	0	0	0	0	1.42099	0	0	0	1.40339	1.4009	1.4008	0	2.82438	SCRNASEQ: Hurskainen_33692365_endothelial, RNASEQ: Hirani_37876024
RALGAPA2	0	0	0	0	0	0	0	0	0	0	0	0	0	0	0	0	0	0	0	0	0	0	0	0	0	0	0	0	1.43041	0	0	0	1.39387	1.39166	1.38985	0	2.82428	SCRNASEQ: Hurskainen_33692365_endothelial, RNASEQ: Hirani_37876024
TIMM10B	0	0	0	0	0	0	0	0	0	0	0	0	0	0	0	0	0	0	0	0	0	0	0	0	0	0	0	0	0	0	0	1.37345	0	0	0	1.45065	2.8241	SCRNASEQ: Scaffa_34417156_ranked, RNASEQ: Rao_37310763_ranked
BCL2L1	0	0	0	0	0	0	0	0	0	0	0	0	0	0	0	0	0	0	0	0	0	0	0	0	0	0	0	0	1.43063	0	0	1.37438	1.3932	1.39103	1.38904	0	2.82382	SCRNASEQ: Hurskainen_33692365_endothelial, RNASEQ: Hirani_37876024
NCS1	0	0	0	0	0	0	0	0	0	0	0	0	0	0	0	0	0	0	0	0	0	0	0	0	0	0	0	0	1.42139	0	0	0	1.40231	1.39988	1.39956	0	2.8237	SCRNASEQ: Hurskainen_33692365_endothelial, RNASEQ: Hirani_37876024
SAMHD1	0	0	0	0	0	0	0	0	0	0	0	0	0	0	0	0	0	0	0	0	0	0	0	0	0	0	0	0	0	0	1.37591	0	1.39226	1.3901	1.38791	1.44771	2.82362	SCRNASEQ: Scaffa_34417156_ranked, RNASEQ: Nitkin_32753701_6hr_unranked
PREX1	0	0	0	0	0	0	0	0	0	0	0	0	0	0	0	0	0	0	0	0	0	0	0	0	0	0	0	0	1.43235	0	0	0	1.39115	1.38897	0	0	2.8235	SCRNASEQ: Hurskainen_33692365_endothelial, RNASEQ: Hirani_37876024
EFHD2	0	0	0	0	0	0	0	0	0	0	0	0	0	0	0	0	0	0	0	0	0	0	0	0	0	0	0	0	0	0	1.37591	0	0	0	0	1.44753	2.82344	SCRNASEQ: Scaffa_34417156_ranked, RNASEQ: Nitkin_32753701_6hr_unranked
PTGES3	0	0	0	0	0	0	0	0	0	0	0	0	0	0	0	0	0	0	0	0	0	0	0	0	0	0	0	0	1.42078	0	0	0	1.4024	1.39997	1.39966	0	2.82318	SCRNASEQ: Hurskainen_33692365_endothelial, RNASEQ: Hirani_37876024
SEC23B	0	0	0	0	0	0	0	0	0	0	0	0	0	0	0	0	0	0	0	0	0	0	0	0	0	0	0	0	1.42901	0	0	0	1.394	1.39179	1.39	0	2.82301	SCRNASEQ: Hurskainen_33692365_endothelial, RNASEQ: Hirani_37876024
NPR3	0	0	0	0	0	0	0	0	0	0	0	0	0	0	0	0	0	0	0	0	0	0	0	0	0	0	0	0	0	0	0	1.37782	0	0	0	1.44508	2.8229	SCRNASEQ: Scaffa_34417156_ranked, RNASEQ: Rao_37310763_ranked
Zeb2os	0	0	0	0	0	0	0	0	0	0	0	0	0	0	0	0	0	0	0	0	0	0	0	0	0	0	0	0	1.42129	0	0	1.39448	1.40102	1.39861	1.39811	0	2.82231	SCRNASEQ: Hurskainen_33692365_endothelial, RNASEQ: Hirani_37876024
GPR176	0	0	0	0	0	0	0	0	0	0	0	0	0	0	0	0	0	0	0	0	0	0	0	0	0	0	0	0	1.42518	0	0	1.36417	1.39697	1.39472	1.39341	0	2.82215	SCRNASEQ: Hurskainen_33692365_endothelial, RNASEQ: Hirani_37876024
NOP56	0	0	0	0	0	0	0	0	0	0	0	0	0	0	0	0	0	0	0	0	0	0	0	0	0	0	0	0	1.42695	0	0	0	1.39497	1.39273	1.39111	0	2.82192	SCRNASEQ: Hurskainen_33692365_endothelial, RNASEQ: Hirani_37876024
RYR3	0	0	0	0	0	0	0	0	0	0	0	0	0	0	0	0	0	0	0	0	0	0	0	0	0	0	0	0	1.42391	0	0	0	1.39718	1.39492	1.39365	0	2.82109	SCRNASEQ: Hurskainen_33692365_endothelial, RNASEQ: Hirani_37876024
PMEPA1	0	0	0	0	0	0	0	0	0	0	0	0	0	0	0	0	0	0	0	0	0	0	0	0	0	0	0	0	0	0	0	1.37704	0	0	0	1.44396	2.82099	SCRNASEQ: Scaffa_34417156_ranked, RNASEQ: Rao_37310763_ranked
THBS1	0	0	0	0	0	0	0	0	0	0	0	0	0	0	0	0	0	0	0	0	0	0	0	0	0	0	0	0	1.42372	0	0	0	1.397	1.39475	1.39344	0	2.82072	SCRNASEQ: Hurskainen_33692365_endothelial, RNASEQ: Hirani_37876024
ACTA2	0	0	0	0	0	0	0	0	0	0	0	0	0	0	0	0	0	0	0	0	0	0	0	0	0	0	0	0	0	0	0	1.37179	0	0	0	1.44866	2.82045	SCRNASEQ: Scaffa_34417156_ranked, RNASEQ: Rao_37310763_ranked
KLF13	0	0	0	0	0	0	0	0	0	0	0	0	0	0	0	0	0	0	0	0	0	0	0	0	0	0	0	0	0	0	0	1.37218	0	0	0	1.44782	2.82	SCRNASEQ: Scaffa_34417156_ranked, RNASEQ: Rao_37310763_ranked
CHST1	0	0	0	0	0	0	0	0	0	0	0	0	0	0	0	0	0	0	0	0	0	0	0	0	0	0	0	0	1.42143	0	0	0	1.3982	1.39585	1.39483	0	2.81963	SCRNASEQ: Hurskainen_33692365_endothelial, RNASEQ: Hirani_37876024
NAT10	0	0	0	0	0	0	0	0	0	0	0	0	0	0	0	0	0	0	0	0	0	0	0	0	0	0	0	0	1.4218	0	0	0	1.39779	1.39546	1.39436	0	2.81959	SCRNASEQ: Hurskainen_33692365_endothelial, RNASEQ: Hirani_37876024
TOX2	0	0	0	0	0	0	0	0	0	0	0	0	0	0	0	0	0	0	0	0	0	0	0	0	0	0	0	0	1.42725	0	0	0	1.39183	1.38966	0	0	2.81908	SCRNASEQ: Hurskainen_33692365_endothelial, RNASEQ: Hirani_37876024
WFDC3	0	0	0	0	0	0	0	0	0	0	0	0	0	0	0	0	0	0	0	0	0	0	0	0	0	0	0	0	1.42752	0	0	0	1.39151	1.38933	0	0	2.81904	SCRNASEQ: Hurskainen_33692365_endothelial, RNASEQ: Hirani_37876024
MYH7B	0	0	0	0	0	0	0	0	0	0	0	0	0	0	0	0	0	0	0	0	0	0	0	0	0	0	0	0	1.42848	0	0	0	0	1.3905	1.38839	0	2.81899	SCRNASEQ: Hurskainen_33692365_epithelial, RNASEQ: Hirani_37876024
CHMP4B	0	0	0	0	0	0	0	0	0	0	0	0	0	0	0	0	0	0	0	0	0	0	0	0	0	0	0	0	0	0	1.37591	0	1.39282	1.39067	1.38859	1.44299	2.8189	SCRNASEQ: Scaffa_34417156_ranked, RNASEQ: Nitkin_32753701_6hr_unranked
EGR1	0	0	0	0	0	0	0	0	0	0	0	0	0	0	0	0	0	0	0	0	0	0	0	0	0	0	0	0	0	0	0	1.37202	0	0	0	1.44682	2.81883	SCRNASEQ: Scaffa_34417156_ranked, RNASEQ: Rao_37310763_ranked
GLIPR2	0	0	0	0	0	0	0	0	0	0	0	0	0	0	0	0	0	0	0	0	0	0	0	0	0	0	0	0	0	0	1.37591	0	0	0	0	1.44272	2.81863	SCRNASEQ: Scaffa_34417156_ranked, RNASEQ: Nitkin_32753701_6hr_unranked
FBLN7	0	0	0	0	0	0	0	0	0	0	0	0	0	0	0	0	0	0	0	0	0	0	0	0	0	0	0	0	0	0	0	1.42318	1.39517	1.39291	1.39133	0	2.81835	SCRNASEQ: Hurskainen_33692365_endothelial, RNASEQ: Rao_37310763_ranked
PFDN2	0	0	0	0	0	0	0	0	0	0	0	0	0	0	0	0	0	0	0	0	0	0	0	0	0	0	0	0	0	0	0	1.37727	1.40731	1.40475	1.40534	1.44101	2.81829	SCRNASEQ: Scaffa_34417156_ranked, RNASEQ: Rao_37310763_ranked
DRAP1	0	0	0	0	0	0	0	0	0	0	0	0	0	0	0	0	0	0	0	0	0	0	0	0	0	0	0	0	0	0	0	1.36597	0	0	0	1.4515	2.81746	SCRNASEQ: Scaffa_34417156_ranked, RNASEQ: Rao_37310763_ranked
CDH22	0	0	0	0	0	0	0	0	0	0	0	0	0	0	0	0	0	0	0	0	0	0	0	0	0	0	0	0	1.42601	0	0	0	1.39128	1.38911	0	0	2.81728	SCRNASEQ: Hurskainen_33692365_endothelial, RNASEQ: Hirani_37876024
VIL1	0	0	0	0	0	0	0	0	0	0	0	0	0	0	0	0	0	0	0	0	0	0	0	0	0	0	0	0	0	0	0	1.40364	1.41344	1.41082	1.4125	0	2.81708	SCRNASEQ: Hurskainen_33692365_endothelial, RNASEQ: Rao_37310763_ranked
ADGRL2	0	0	0	0	0	0	0	0	0	0	0	0	0	0	0	0	0	0	0	0	0	0	0	0	0	0	0	0	0	0	0	1.37327	0	0	0	1.44306	2.81633	SCRNASEQ: Scaffa_34417156_ranked, RNASEQ: Rao_37310763_ranked
DSTN	0	0	0	0	0	0	0	0	0	0	0	0	0	0	0	0	0	0	0	0	0	0	0	0	0	0	0	0	1.42208	0	0	0	1.39412	1.3919	1.39013	0	2.81619	SCRNASEQ: Hurskainen_33692365_endothelial, RNASEQ: Hirani_37876024
SCN3A	0	0	0	0	0	0	0	0	0	0	0	0	0	0	0	0	0	0	0	0	0	0	0	0	0	0	0	0	0	0	0	1.36858	1.40034	1.39793	1.39733	1.447	2.81558	SCRNASEQ: Scaffa_34417156_ranked, RNASEQ: Rao_37310763_ranked
SDC4	0	0	0	0	0	0	0	0	0	0	0	0	0	0	0	0	0	0	0	0	0	0	0	0	0	0	0	0	0	0	0	1.37284	1.39159	1.38941	0	1.44255	2.81539	SCRNASEQ: Scaffa_34417156_ranked, RNASEQ: Rao_37310763_ranked
KLHDC2	0	0	0	0	0	0	0	0	0	0	0	0	0	0	0	0	0	0	0	0	0	0	0	0	0	0	0	0	0	0	0	1.37323	0	0	0	1.44212	2.81534	SCRNASEQ: Scaffa_34417156_ranked, RNASEQ: Rao_37310763_ranked
MACROH2A1	0	0	0	0	0	0	0	0	0	0	0	0	0	0	0	0	0	0	0	0	0	0	0	0	0	0	0	0	0	0	0	1.36706	0	0	0	1.44806	2.81512	SCRNASEQ: Scaffa_34417156_ranked, RNASEQ: Rao_37310763_ranked
LMO4	0	0	0	0	0	0	0	0	0	0	0	0	0	0	0	0	0	0	0	0	0	0	0	0	0	0	0	0	0	0	0	1.3684	0	0	0	1.44666	2.81505	SCRNASEQ: Scaffa_34417156_ranked, RNASEQ: Rao_37310763_ranked
IL18R1	0	0	0	0	0	0	0	0	0	0	0	0	0	0	0	0	0	0	0	0	0	0	0	0	0	0	0	0	0	0	0	1.39942	1.41537	1.41277	1.41476	0	2.81479	SCRNASEQ: Hurskainen_33692365_endothelial, RNASEQ: Rao_37310763_ranked
COL13A1	0	0	0	0	0	0	0	0	0	0	0	0	0	0	0	0	0	0	0	0	0	0	0	0	0	0	0	0	0	0	0	1.36972	0	0	0	1.44488	2.81459	SCRNASEQ: Scaffa_34417156_ranked, RNASEQ: Rao_37310763_ranked
GNG10	0	0	0	0	0	0	0	0	0	0	0	0	0	0	0	0	0	0	0	0	0	0	0	0	0	0	0	0	0	0	0	1.36651	0	0	0	1.44805	2.81456	SCRNASEQ: Scaffa_34417156_ranked, RNASEQ: Rao_37310763_ranked
TMEM258	0	0	0	0	0	0	0	0	0	0	0	0	0	0	0	0	0	0	0	0	0	0	0	0	0	0	0	0	0	0	0	1.36358	0	0	0	1.45092	2.81451	SCRNASEQ: Scaffa_34417156_ranked, RNASEQ: Rao_37310763_ranked
DEDD	0	0	0	0	0	0	0	0	0	0	0	0	0	0	0	0	0	0	0	0	0	0	0	0	0	0	0	0	0	0	0	1.40694	1.40734	1.40477	1.40537	0	2.81427	SCRNASEQ: Hurskainen_33692365_endothelial, RNASEQ: Rao_37310763_ranked
CIZ1	0	0	0	0	0	0	0	0	0	0	0	0	0	0	0	0	0	0	0	0	0	0	0	0	0	0	0	0	0	0	0	1.412	1.40208	1.39965	1.39928	0	2.81407	SCRNASEQ: Hurskainen_33692365_endothelial, RNASEQ: Rao_37310763_ranked
POLR1D	0	0	0	0	0	0	0	0	0	0	0	0	0	0	0	0	0	0	0	0	0	0	0	0	0	0	0	0	0	0	0	1.36247	0	0	0	1.45137	2.81384	SCRNASEQ: Scaffa_34417156_ranked, RNASEQ: Rao_37310763_ranked
FLI1	0	0	0	0	0	0	0	0	0	0	0	0	0	0	0	0	0	0	0	0	0	0	0	0	0	0	0	0	0	0	0	1.36523	0	0	0	1.4486	2.81382	SCRNASEQ: Scaffa_34417156_ranked, RNASEQ: Rao_37310763_ranked
EIF4EBP1	0	0	0	0	0	0	0	0	0	0	0	0	0	0	0	0	0	0	0	0	0	0	0	0	0	0	0	0	0	0	0	1.3672	0	0	0	1.44628	2.81349	SCRNASEQ: Scaffa_34417156_ranked, RNASEQ: Rao_37310763_ranked
RPL41	0	0	0	0	0	0	0	0	0	0	0	0	0	0	0	0	0	0	0	0	0	0	0	0	0	0	0	0	0	0	0	1.36289	0	0	0	1.45048	2.81337	SCRNASEQ: Scaffa_34417156_ranked, RNASEQ: Rao_37310763_ranked
PARD6B	0	0	0	0	0	0	0	0	0	0	0	0	0	0	0	0	0	0	0	0	0	0	0	0	0	0	0	0	1.42213	0	0	0	1.39091	0	0	0	2.81304	SCRNASEQ: Hurskainen_33692365_endothelial, RNASEQ: Hirani_37876024
NDUFA13	0	0	0	0	0	0	0	0	0	0	0	0	0	0	0	0	0	0	0	0	0	0	0	0	0	0	0	0	0	0	0	1.36238	0	0	0	1.45055	2.81293	SCRNASEQ: Scaffa_34417156_ranked, RNASEQ: Rao_37310763_ranked
H2AZ1	0	0	0	0	0	0	0	0	0	0	0	0	0	0	0	0	0	0	0	0	0	0	0	0	0	0	0	0	0	0	0	1.36213	0	0	0	1.4508	2.81293	SCRNASEQ: Scaffa_34417156_ranked, RNASEQ: Rao_37310763_ranked
RILPL2	0	0	0	0	0	0	0	0	0	0	0	0	0	0	0	0	0	0	0	0	0	0	0	0	0	0	0	0	0	0	0	1.36481	0	0	0	1.44807	2.81288	SCRNASEQ: Scaffa_34417156_ranked, RNASEQ: Rao_37310763_ranked
TRIR	0	0	0	0	0	0	0	0	0	0	0	0	0	0	0	0	0	0	0	0	0	0	0	0	0	0	0	0	0	0	0	1.36284	0	0	0	1.44997	2.81281	SCRNASEQ: Scaffa_34417156_ranked, RNASEQ: Rao_37310763_ranked
NES	0	0	0	0	0	0	0	0	0	0	0	0	0	0	0	0	0	0	0	0	0	0	0	0	0	0	0	0	0	0	0	1.36218	0	0	0	1.45059	2.81277	SCRNASEQ: Scaffa_34417156_ranked, RNASEQ: Rao_37310763_ranked
PAX5	0	0	0	0	0	0	0	0	0	0	0	0	0	0	0	0	0	0	0	0	0	0	0	0	0	0	0	0	0	0	0	1.36395	0	0	0	1.44864	2.81258	SCRNASEQ: Scaffa_34417156_ranked, RNASEQ: Rao_37310763_ranked
NEAT1	0	0	0	0	0	0	0	0	0	0	0	0	0	0	0	0	0	0	0	0	0	0	0	0	0	0	0	0	0	0	0	1.3648	0	0	0	1.44748	2.81228	SCRNASEQ: Scaffa_34417156_ranked, RNASEQ: Rao_37310763_ranked
IER5	0	0	0	0	0	0	0	0	0	0	0	0	0	0	0	0	0	0	0	0	0	0	0	0	0	0	0	0	0	0	0	1.36367	1.40891	1.40631	1.40724	1.44843	2.8121	SCRNASEQ: Scaffa_34417156_ranked, RNASEQ: Rao_37310763_ranked
RPL31	0	0	0	0	0	0	0	0	0	0	0	0	0	0	0	0	0	0	0	0	0	0	0	0	0	0	0	0	0	0	0	1.36189	1.4155	1.4129	1.41492	1.45013	2.81202	SCRNASEQ: Scaffa_34417156_ranked, RNASEQ: Rao_37310763_ranked
ECSCR	0	0	0	0	0	0	0	0	0	0	0	0	0	0	0	0	0	0	0	0	0	0	0	0	0	0	0	0	0	0	0	1.36219	0	0	0	1.44979	2.81197	SCRNASEQ: Scaffa_34417156_ranked, RNASEQ: Rao_37310763_ranked
S1PR1	0	0	0	0	0	0	0	0	0	0	0	0	0	0	0	0	0	0	0	0	0	0	0	0	0	0	0	0	0	0	0	1.3666	0	0	0	1.44534	2.81194	SCRNASEQ: Scaffa_34417156_ranked, RNASEQ: Rao_37310763_ranked
CD34	0	0	0	0	0	0	0	0	0	0	0	0	0	0	0	0	0	0	0	0	0	0	0	0	0	0	0	0	0	0	0	1.36216	1.40536	1.40287	1.40308	1.44978	2.81194	SCRNASEQ: Scaffa_34417156_ranked, RNASEQ: Rao_37310763_ranked
MAMDC2	0	0	0	0	0	0	0	0	0	0	0	0	0	0	0	0	0	0	0	0	0	0	0	0	0	0	0	0	0	0	0	1.36474	0	0	0	1.44703	2.81177	SCRNASEQ: Scaffa_34417156_ranked, RNASEQ: Rao_37310763_ranked
NEURL3	0	0	0	0	0	0	0	0	0	0	0	0	0	0	0	0	0	0	0	0	0	0	0	0	0	0	0	0	0	0	0	1.36263	1.41591	1.4133	1.41538	1.44896	2.81158	SCRNASEQ: Scaffa_34417156_ranked, RNASEQ: Rao_37310763_ranked
USP19	0	0	0	0	0	0	0	0	0	0	0	0	0	0	0	0	0	0	0	0	0	0	0	0	0	0	0	0	0	0	0	1.36292	0	0	0	1.44856	2.81148	SCRNASEQ: Scaffa_34417156_ranked, RNASEQ: Rao_37310763_ranked
TMEM178A	0	0	0	0	0	0	0	0	0	0	0	0	0	0	0	0	0	0	0	0	0	0	0	0	0	0	0	0	0	0	0	1.36769	0	0	0	1.4435	2.81119	SCRNASEQ: Scaffa_34417156_ranked, RNASEQ: Rao_37310763_ranked
CYBA	0	0	0	0	0	0	0	0	0	0	0	0	0	0	0	0	0	0	0	0	0	0	0	0	0	0	0	0	0	0	0	1.36202	0	0	0	1.44905	2.81107	SCRNASEQ: Scaffa_34417156_ranked, RNASEQ: Rao_37310763_ranked
GPX4	0	0	0	0	0	0	0	0	0	0	0	0	0	0	0	0	0	0	0	0	0	0	0	0	0	0	0	0	0	0	0	1.36217	0	0	0	1.44852	2.81069	SCRNASEQ: Scaffa_34417156_ranked, RNASEQ: Rao_37310763_ranked
RASSF3	0	0	0	0	0	0	0	0	0	0	0	0	0	0	0	0	0	0	0	0	0	0	0	0	0	0	0	0	0	0	0	1.36191	0	0	0	1.44868	2.81059	SCRNASEQ: Scaffa_34417156_ranked, RNASEQ: Rao_37310763_ranked
ATP6V1F	0	0	0	0	0	0	0	0	0	0	0	0	0	0	0	0	0	0	0	0	0	0	0	0	0	0	0	0	0	0	0	1.36394	0	0	0	1.4466	2.81054	SCRNASEQ: Scaffa_34417156_ranked, RNASEQ: Rao_37310763_ranked
PCMTD1	0	0	0	0	0	0	0	0	0	0	0	0	0	0	0	0	0	0	0	0	0	0	0	0	0	0	0	0	0	0	0	1.36174	1.41683	1.4142	1.41648	1.44867	2.81041	SCRNASEQ: Scaffa_34417156_ranked, RNASEQ: Rao_37310763_ranked
LIMD2	0	0	0	0	0	0	0	0	0	0	0	0	0	0	0	0	0	0	0	0	0	0	0	0	0	0	0	0	0	0	0	1.36222	0	0	0	1.44818	2.8104	SCRNASEQ: Scaffa_34417156_ranked, RNASEQ: Rao_37310763_ranked
PRELP	0	0	0	0	0	0	0	0	0	0	0	0	0	0	0	0	0	0	0	0	0	0	0	0	0	0	0	0	0	0	0	1.36169	1.41007	1.40745	1.4086	1.44867	2.81036	SCRNASEQ: Scaffa_34417156_ranked, RNASEQ: Rao_37310763_ranked
GPX3	0	0	0	0	0	0	0	0	0	0	0	0	0	0	0	0	0	0	0	0	0	0	0	0	0	0	0	0	0	0	0	1.36175	0	0	0	1.44852	2.81028	SCRNASEQ: Scaffa_34417156_ranked, RNASEQ: Rao_37310763_ranked
Abca8a	0	0	0	0	0	0	0	0	0	0	0	0	0	0	0	0	0	0	0	0	0	0	0	0	0	0	0	0	0	0	0	1.36313	0	0	0	1.44712	2.81024	SCRNASEQ: Scaffa_34417156_ranked, RNASEQ: Rao_37310763_ranked
UFM1	0	0	0	0	0	0	0	0	0	0	0	0	0	0	0	0	0	0	0	0	0	0	0	0	0	0	0	0	0	0	0	1.3676	0	0	0	1.44257	2.81017	SCRNASEQ: Scaffa_34417156_ranked, RNASEQ: Rao_37310763_ranked
SRSF9	0	0	0	0	0	0	0	0	0	0	0	0	0	0	0	0	0	0	0	0	0	0	0	0	0	0	0	0	0	0	0	1.36364	0	0	0	1.44653	2.81016	SCRNASEQ: Scaffa_34417156_ranked, RNASEQ: Rao_37310763_ranked
CALD1	0	0	0	0	0	0	0	0	0	0	0	0	0	0	0	0	0	0	0	0	0	0	0	0	0	0	0	0	0	0	0	1.36178	0	0	0	1.44835	2.81013	SCRNASEQ: Scaffa_34417156_ranked, RNASEQ: Rao_37310763_ranked
CLEC7A	0	0	0	0	0	0	0	0	0	0	0	0	0	0	0	0	0	0	0	0	0	0	0	0	0	0	0	0	0	0	0	1.36231	0	0	0	1.44751	2.80983	SCRNASEQ: Scaffa_34417156_ranked, RNASEQ: Rao_37310763_ranked
MYH11	0	0	0	0	0	0	0	0	0	0	0	0	0	0	0	0	0	0	0	0	0	0	0	0	0	0	0	0	0	0	0	1.36557	0	0	0	1.44404	2.80962	SCRNASEQ: Scaffa_34417156_ranked, RNASEQ: Rao_37310763_ranked
CDKN1C	0	0	0	0	0	0	0	0	0	0	0	0	0	0	0	0	0	0	0	0	0	0	0	0	0	0	0	0	0	0	0	1.3627	0	0	0	1.44683	2.80953	SCRNASEQ: Scaffa_34417156_ranked, RNASEQ: Rao_37310763_ranked
PTPN1	0	0	0	0	0	0	0	0	0	0	0	0	0	0	0	0	0	0	0	0	0	0	0	0	0	0	0	0	0	0	0	1.36182	1.39093	0	0	1.44763	2.80945	SCRNASEQ: Scaffa_34417156_ranked, RNASEQ: Rao_37310763_ranked
SRRM2	0	0	0	0	0	0	0	0	0	0	0	0	0	0	0	0	0	0	0	0	0	0	0	0	0	0	0	0	0	0	0	1.36214	0	0	0	1.44723	2.80937	SCRNASEQ: Scaffa_34417156_ranked, RNASEQ: Rao_37310763_ranked
OLFML2B	0	0	0	0	0	0	0	0	0	0	0	0	0	0	0	0	0	0	0	0	0	0	0	0	0	0	0	0	0	0	0	1.36532	1.40761	1.40505	1.40569	1.44378	2.80911	SCRNASEQ: Scaffa_34417156_ranked, RNASEQ: Rao_37310763_ranked
PDAP1	0	0	0	0	0	0	0	0	0	0	0	0	0	0	0	0	0	0	0	0	0	0	0	0	0	0	0	0	0	0	0	1.36221	0	0	0	1.44676	2.80897	SCRNASEQ: Scaffa_34417156_ranked, RNASEQ: Rao_37310763_ranked
LRAT	0	0	0	0	0	0	0	0	0	0	0	0	0	0	0	0	0	0	0	0	0	0	0	0	0	0	0	0	0	0	0	1.36175	0	0	0	1.44717	2.80893	SCRNASEQ: Scaffa_34417156_ranked, RNASEQ: Rao_37310763_ranked
MYL9	0	0	0	0	0	0	0	0	0	0	0	0	0	0	0	0	0	0	0	0	0	0	0	0	0	0	0	0	0	0	0	1.36171	1.39236	1.39018	1.38801	1.44704	2.80875	SCRNASEQ: Scaffa_34417156_ranked, RNASEQ: Rao_37310763_ranked
NDUFB7	0	0	0	0	0	0	0	0	0	0	0	0	0	0	0	0	0	0	0	0	0	0	0	0	0	0	0	0	0	0	0	1.36189	0	0	0	1.44684	2.80874	SCRNASEQ: Scaffa_34417156_ranked, RNASEQ: Rao_37310763_ranked
MRPS16	0	0	0	0	0	0	0	0	0	0	0	0	0	0	0	0	0	0	0	0	0	0	0	0	0	0	0	0	0	0	0	1.36262	0	0	0	1.44605	2.80868	SCRNASEQ: Scaffa_34417156_ranked, RNASEQ: Rao_37310763_ranked
ST8SIA2	0	0	0	0	0	0	0	0	0	0	0	0	0	0	0	0	0	0	0	0	0	0	0	0	0	0	0	0	0	0	0	1.36187	0	0	0	1.44636	2.80823	SCRNASEQ: Scaffa_34417156_ranked, RNASEQ: Rao_37310763_ranked
SCAND1	0	0	0	0	0	0	0	0	0	0	0	0	0	0	0	0	0	0	0	0	0	0	0	0	0	0	0	0	0	0	0	1.36168	1.39243	1.39026	1.3881	1.44641	2.80809	SCRNASEQ: Scaffa_34417156_ranked, RNASEQ: Rao_37310763_ranked
SKP1	0	0	0	0	0	0	0	0	0	0	0	0	0	0	0	0	0	0	0	0	0	0	0	0	0	0	0	0	0	0	0	1.36271	0	0	0	1.44513	2.80783	SCRNASEQ: Scaffa_34417156_ranked, RNASEQ: Rao_37310763_ranked
CREB3L1	0	0	0	0	0	0	0	0	0	0	0	0	0	0	0	0	0	0	0	0	0	0	0	0	0	0	0	0	0	0	0	1.36332	1.3983	1.39596	1.39495	1.44444	2.80776	SCRNASEQ: Scaffa_34417156_ranked, RNASEQ: Rao_37310763_ranked
DBI	0	0	0	0	0	0	0	0	0	0	0	0	0	0	0	0	0	0	0	0	0	0	0	0	0	0	0	0	0	0	0	1.36173	1.41099	1.40839	1.40969	1.44595	2.80768	SCRNASEQ: Scaffa_34417156_ranked, RNASEQ: Rao_37310763_ranked
HIGD1A	0	0	0	0	0	0	0	0	0	0	0	0	0	0	0	0	0	0	0	0	0	0	0	0	0	0	0	0	0	0	0	1.36193	0	0	0	1.44572	2.80765	SCRNASEQ: Scaffa_34417156_ranked, RNASEQ: Rao_37310763_ranked
METTL9	0	0	0	0	0	0	0	0	0	0	0	0	0	0	0	0	0	0	0	0	0	0	0	0	0	0	0	0	0	0	0	1.36326	0	0	0	1.44433	2.80759	SCRNASEQ: Scaffa_34417156_ranked, RNASEQ: Rao_37310763_ranked
SMAP2	0	0	0	0	0	0	0	0	0	0	0	0	0	0	0	0	0	0	0	0	0	0	0	0	0	0	0	0	0	0	0	1.362	0	0	0	1.44555	2.80755	SCRNASEQ: Scaffa_34417156_ranked, RNASEQ: Rao_37310763_ranked
FUNDC2	0	0	0	0	0	0	0	0	0	0	0	0	0	0	0	0	0	0	0	0	0	0	0	0	0	0	0	0	0	0	0	1.36243	0	0	0	1.44499	2.80742	SCRNASEQ: Scaffa_34417156_ranked, RNASEQ: Rao_37310763_ranked
MYDGF	0	0	0	0	0	0	0	0	0	0	0	0	0	0	0	0	0	0	0	0	0	0	0	0	0	0	0	0	0	0	0	1.36629	0	0	0	1.44111	2.8074	SCRNASEQ: Scaffa_34417156_ranked, RNASEQ: Rao_37310763_ranked
UNC5C	0	0	0	0	0	0	0	0	0	0	0	0	0	0	0	0	0	0	0	0	0	0	0	0	0	0	0	0	0	0	0	1.36282	0	0	0	1.44457	2.80739	SCRNASEQ: Scaffa_34417156_ranked, RNASEQ: Rao_37310763_ranked
UBALD2	0	0	0	0	0	0	0	0	0	0	0	0	0	0	0	0	0	0	0	0	0	0	0	0	0	0	0	0	0	0	0	1.36178	0	0	0	1.44558	2.80736	SCRNASEQ: Scaffa_34417156_ranked, RNASEQ: Rao_37310763_ranked
GNB4	0	0	0	0	0	0	0	0	0	0	0	0	0	0	0	0	0	0	0	0	0	0	0	0	0	0	0	0	0	0	0	1.36495	0	0	0	1.44237	2.80732	SCRNASEQ: Scaffa_34417156_ranked, RNASEQ: Rao_37310763_ranked
SNHG18	0	0	0	0	0	0	0	0	0	0	0	0	0	0	0	0	0	0	0	0	0	0	0	0	0	0	0	0	0	0	0	1.36299	0	0	0	1.44424	2.80724	SCRNASEQ: Scaffa_34417156_ranked, RNASEQ: Rao_37310763_ranked
MXRA7	0	0	0	0	0	0	0	0	0	0	0	0	0	0	0	0	0	0	0	0	0	0	0	0	0	0	0	0	0	0	0	1.36211	0	0	0	1.44499	2.8071	SCRNASEQ: Scaffa_34417156_ranked, RNASEQ: Rao_37310763_ranked
PSMC2	0	0	0	0	0	0	0	0	0	0	0	0	0	0	0	0	0	0	0	0	0	0	0	0	0	0	0	0	0	0	0	1.36514	0	0	0	1.44193	2.80708	SCRNASEQ: Scaffa_34417156_ranked, RNASEQ: Rao_37310763_ranked
MAPRE1	0	0	0	0	0	0	0	0	0	0	0	0	0	0	0	0	0	0	0	0	0	0	0	0	0	0	0	0	0	0	0	1.36234	1.39299	1.39082	1.38878	1.44453	2.80687	SCRNASEQ: Scaffa_34417156_ranked, RNASEQ: Rao_37310763_ranked
ANAPC13	0	0	0	0	0	0	0	0	0	0	0	0	0	0	0	0	0	0	0	0	0	0	0	0	0	0	0	0	0	0	0	1.36172	0	0	0	1.44491	2.80663	SCRNASEQ: Scaffa_34417156_ranked, RNASEQ: Rao_37310763_ranked
SEC11A	0	0	0	0	0	0	0	0	0	0	0	0	0	0	0	0	0	0	0	0	0	0	0	0	0	0	0	0	0	0	0	1.36186	0	0	0	1.44472	2.80657	SCRNASEQ: Scaffa_34417156_ranked, RNASEQ: Rao_37310763_ranked
UNC5B	0	0	0	0	0	0	0	0	0	0	0	0	0	0	0	0	0	0	0	0	0	0	0	0	0	0	0	0	0	0	0	1.36331	0	0	0	1.44304	2.80635	SCRNASEQ: Scaffa_34417156_ranked, RNASEQ: Rao_37310763_ranked
SNED1	0	0	0	0	0	0	0	0	0	0	0	0	0	0	0	0	0	0	0	0	0	0	0	0	0	0	0	0	0	0	0	1.36205	1.41164	1.409	1.41044	1.4442	2.80625	SCRNASEQ: Scaffa_34417156_ranked, RNASEQ: Rao_37310763_ranked
HIGD2A	0	0	0	0	0	0	0	0	0	0	0	0	0	0	0	0	0	0	0	0	0	0	0	0	0	0	0	0	0	0	0	1.3641	0	0	0	1.44208	2.80618	SCRNASEQ: Scaffa_34417156_ranked, RNASEQ: Rao_37310763_ranked
SELENBP1	0	0	0	0	0	0	0	0	0	0	0	0	0	0	0	0	0	0	0	0	0	0	0	0	0	0	0	0	0	0	0	1.36478	0	0	0	1.44134	2.80611	SCRNASEQ: Scaffa_34417156_ranked, RNASEQ: Rao_37310763_ranked
PHLDB2	0	0	0	0	0	0	0	0	0	0	0	0	0	0	0	0	0	0	0	0	0	0	0	0	0	0	0	0	0	0	0	1.36184	0	0	0	1.4442	2.80605	SCRNASEQ: Scaffa_34417156_ranked, RNASEQ: Rao_37310763_ranked
CCDC88A	0	0	0	0	0	0	0	0	0	0	0	0	0	0	0	0	0	0	0	0	0	0	0	0	0	0	0	0	0	0	0	1.36179	0	0	0	1.44423	2.80602	SCRNASEQ: Scaffa_34417156_ranked, RNASEQ: Rao_37310763_ranked
VDAC3	0	0	0	0	0	0	0	0	0	0	0	0	0	0	0	0	0	0	0	0	0	0	0	0	0	0	0	0	0	0	0	1.36174	0	0	0	1.44424	2.80598	SCRNASEQ: Scaffa_34417156_ranked, RNASEQ: Rao_37310763_ranked
GREM2	0	0	0	0	0	0	0	0	0	0	0	0	0	0	0	0	0	0	0	0	0	0	0	0	0	0	0	0	0	0	0	1.36191	1.40681	1.40429	1.40473	1.44404	2.80595	SCRNASEQ: Scaffa_34417156_ranked, RNASEQ: Rao_37310763_ranked
LSM8	0	0	0	0	0	0	0	0	0	0	0	0	0	0	0	0	0	0	0	0	0	0	0	0	0	0	0	0	0	0	0	1.36259	0	0	0	1.44309	2.80568	SCRNASEQ: Scaffa_34417156_ranked, RNASEQ: Rao_37310763_ranked
RTN4	0	0	0	0	0	0	0	0	0	0	0	0	0	0	0	0	0	0	0	0	0	0	0	0	0	0	0	0	0	0	0	1.362	0	0	0	1.44356	2.80556	SCRNASEQ: Scaffa_34417156_ranked, RNASEQ: Rao_37310763_ranked
AARD	0	0	0	0	0	0	0	0	0	0	0	0	0	0	0	0	0	0	0	0	0	0	0	0	0	0	0	0	0	0	0	1.36167	0	0	0	1.44354	2.80522	SCRNASEQ: Scaffa_34417156_ranked, RNASEQ: Rao_37310763_ranked
PLAT	0	0	0	0	0	0	0	0	0	0	0	0	0	0	0	0	0	0	0	0	0	0	0	0	0	0	0	0	0	0	0	1.36202	0	0	0	1.44278	2.80479	SCRNASEQ: Scaffa_34417156_ranked, RNASEQ: Rao_37310763_ranked
EIF3M	0	0	0	0	0	0	0	0	0	0	0	0	0	0	0	0	0	0	0	0	0	0	0	0	0	0	0	0	0	0	0	1.36199	1.3976	1.39528	1.39414	1.44266	2.80465	SCRNASEQ: Scaffa_34417156_ranked, RNASEQ: Rao_37310763_ranked
GOLIM4	0	0	0	0	0	0	0	0	0	0	0	0	0	0	0	0	0	0	0	0	0	0	0	0	0	0	0	0	0	0	0	1.36177	0	0	0	1.44287	2.80464	SCRNASEQ: Scaffa_34417156_ranked, RNASEQ: Rao_37310763_ranked
TRAPPC4	0	0	0	0	0	0	0	0	0	0	0	0	0	0	0	0	0	0	0	0	0	0	0	0	0	0	0	0	0	0	0	1.362	1.39353	1.39131	1.3894	1.44254	2.80454	SCRNASEQ: Scaffa_34417156_ranked, RNASEQ: Rao_37310763_ranked
BMP5	0	0	0	0	0	0	0	0	0	0	0	0	0	0	0	0	0	0	0	0	0	0	0	0	0	0	0	0	0	0	0	1.36179	0	0	0	1.44271	2.8045	SCRNASEQ: Scaffa_34417156_ranked, RNASEQ: Rao_37310763_ranked
BET1	0	0	0	0	0	0	0	0	0	0	0	0	0	0	0	0	0	0	0	0	0	0	0	0	0	0	0	0	0	0	0	1.36172	0	0	0	1.44273	2.80445	SCRNASEQ: Scaffa_34417156_ranked, RNASEQ: Rao_37310763_ranked
MAP4	0	0	0	0	0	0	0	0	0	0	0	0	0	0	0	0	0	0	0	0	0	0	0	0	0	0	0	0	0	0	0	1.3618	0	0	0	1.44259	2.80439	SCRNASEQ: Scaffa_34417156_ranked, RNASEQ: Rao_37310763_ranked
SRGAP1	0	0	0	0	0	0	0	0	0	0	0	0	0	0	0	0	0	0	0	0	0	0	0	0	0	0	0	0	0	0	0	1.3619	0	0	0	1.44248	2.80438	SCRNASEQ: Scaffa_34417156_ranked, RNASEQ: Rao_37310763_ranked
SEPTIN2	0	0	0	0	0	0	0	0	0	0	0	0	0	0	0	0	0	0	0	0	0	0	0	0	0	0	0	0	0	0	0	1.36172	1.41156	1.40894	1.41037	1.44262	2.80434	SCRNASEQ: Scaffa_34417156_ranked, RNASEQ: Rao_37310763_ranked
IMMP1L	0	0	0	0	0	0	0	0	0	0	0	0	0	0	0	0	0	0	0	0	0	0	0	0	0	0	0	0	0	0	0	1.36211	1.39754	1.39522	1.39407	1.44201	2.80412	SCRNASEQ: Scaffa_34417156_ranked, RNASEQ: Rao_37310763_ranked
TMEM132A	0	0	0	0	0	0	0	0	0	0	0	0	0	0	0	0	0	0	0	0	0	0	0	0	0	0	0	0	0	0	0	1.36185	0	0	0	1.44224	2.80409	SCRNASEQ: Scaffa_34417156_ranked, RNASEQ: Rao_37310763_ranked
ADAMTS6	0	0	0	0	0	0	0	0	0	0	0	0	0	0	0	0	0	0	0	0	0	0	0	0	0	0	0	0	0	0	0	1.3618	0	0	0	1.44221	2.80401	SCRNASEQ: Scaffa_34417156_ranked, RNASEQ: Rao_37310763_ranked
VPS29	0	0	0	0	0	0	0	0	0	0	0	0	0	0	0	0	0	0	0	0	0	0	0	0	0	0	0	0	0	0	0	1.36169	0	0	0	1.44231	2.804	SCRNASEQ: Scaffa_34417156_ranked, RNASEQ: Rao_37310763_ranked
DPH3	0	0	0	0	0	0	0	0	0	0	0	0	0	0	0	0	0	0	0	0	0	0	0	0	0	0	0	0	0	0	0	1.36181	0	0	0	1.44213	2.80394	SCRNASEQ: Scaffa_34417156_ranked, RNASEQ: Rao_37310763_ranked
OAF	0	0	0	0	0	0	0	0	0	0	0	0	0	0	0	0	0	0	0	0	0	0	0	0	0	0	0	0	0	0	0	1.36172	0	0	0	1.44213	2.80385	SCRNASEQ: Scaffa_34417156_ranked, RNASEQ: Rao_37310763_ranked
ADPRH	0	0	0	0	0	0	0	0	0	0	0	0	0	0	0	0	0	0	0	0	0	0	0	0	0	0	0	0	0	0	0	1.36338	0	0	0	1.44044	2.80383	SCRNASEQ: Scaffa_34417156_ranked, RNASEQ: Rao_37310763_ranked
SNX6	0	0	0	0	0	0	0	0	0	0	0	0	0	0	0	0	0	0	0	0	0	0	0	0	0	0	0	0	0	0	0	1.36271	0	0	0	1.44088	2.8036	SCRNASEQ: Scaffa_34417156_ranked, RNASEQ: Rao_37310763_ranked
PIGK	0	0	0	0	0	0	0	0	0	0	0	0	0	0	0	0	0	0	0	0	0	0	0	0	0	0	0	0	0	0	0	1.36178	0	0	0	1.44147	2.80325	SCRNASEQ: Scaffa_34417156_ranked, RNASEQ: Rao_37310763_ranked
SLCO3A1	0	0	0	0	0	0	0	0	0	0	0	0	0	0	0	0	0	0	0	0	0	0	0	0	0	0	0	0	0	0	0	1.36341	0	0	0	1.43983	2.80324	SCRNASEQ: Scaffa_34417156_ranked, RNASEQ: Rao_37310763_ranked
SCAF1	0	0	0	0	0	0	0	0	0	0	0	0	0	0	0	0	0	0	0	0	0	0	0	0	0	0	0	0	0	0	0	1.36293	0	0	0	1.44031	2.80323	SCRNASEQ: Scaffa_34417156_ranked, RNASEQ: Rao_37310763_ranked
PLA2R1	0	0	0	0	0	0	0	0	0	0	0	0	0	0	0	0	0	0	0	0	0	0	0	0	0	0	0	0	0	0	0	1.36199	1.40052	1.39811	1.39753	1.44091	2.8029	SCRNASEQ: Scaffa_34417156_ranked, RNASEQ: Rao_37310763_ranked
CKS1B	0	0	0	0	0	0	0	0	0	0	0	0	0	0	0	0	0	0	0	0	0	0	0	0	0	0	0	0	0	0	0	1.36168	0	0	0	1.44098	2.80266	SCRNASEQ: Scaffa_34417156_ranked, RNASEQ: Rao_37310763_ranked
SKIL	0	0	0	0	0	0	0	0	0	0	0	0	0	0	0	0	0	0	0	0	0	0	0	0	0	0	0	0	0	0	0	1.36202	0	0	0	1.44051	2.80253	SCRNASEQ: Scaffa_34417156_ranked, RNASEQ: Rao_37310763_ranked
RAB18	0	0	0	0	0	0	0	0	0	0	0	0	0	0	0	0	0	0	0	0	0	0	0	0	0	0	0	0	0	0	0	1.36235	0	0	0	1.44014	2.80248	SCRNASEQ: Scaffa_34417156_ranked, RNASEQ: Rao_37310763_ranked
Alyref2	0	0	0	0	0	0	0	0	0	0	0	0	0	0	0	0	0	0	0	0	0	0	0	0	0	0	0	0	0	0	0	1.39523	1.40722	1.40466	1.40524	0	2.80245	SCRNASEQ: Hurskainen_33692365_endothelial, RNASEQ: Rao_37310763_ranked
NCBP2	0	0	0	0	0	0	0	0	0	0	0	0	0	0	0	0	0	0	0	0	0	0	0	0	0	0	0	0	0	0	0	1.36255	0	0	0	1.43989	2.80244	SCRNASEQ: Scaffa_34417156_ranked, RNASEQ: Rao_37310763_ranked
JKAMP	0	0	0	0	0	0	0	0	0	0	0	0	0	0	0	0	0	0	0	0	0	0	0	0	0	0	0	0	0	0	0	1.36173	0	0	0	1.4405	2.80222	SCRNASEQ: Scaffa_34417156_ranked, RNASEQ: Rao_37310763_ranked
UBE2T	0	0	0	0	0	0	0	0	0	0	0	0	0	0	0	0	0	0	0	0	0	0	0	0	0	0	0	0	0	0	0	1.39232	1.40989	1.40724	1.40838	0	2.80221	SCRNASEQ: Hurskainen_33692365_endothelial, RNASEQ: Rao_37310763_ranked
TATDN3	0	0	0	0	0	0	0	0	0	0	0	0	0	0	0	0	0	0	0	0	0	0	0	0	0	0	0	0	0	0	0	1.39614	1.40574	1.40324	1.4035	0	2.80188	SCRNASEQ: Hurskainen_33692365_endothelial, RNASEQ: Rao_37310763_ranked
SLMAP	0	0	0	0	0	0	0	0	0	0	0	0	0	0	0	0	0	0	0	0	0	0	0	0	0	0	0	0	0	0	0	1.36168	0	0	0	1.44008	2.80175	SCRNASEQ: Scaffa_34417156_ranked, RNASEQ: Rao_37310763_ranked
LBP	0	0	0	0	0	0	0	0	0	0	0	0	0	0	0	0	0	0	0	0	0	0	0	0	0	0	0	0	0	0	0	1.40301	1.39208	1.38992	1.38769	0	2.79509	SCRNASEQ: Hurskainen_33692365_endothelial, RNASEQ: Rao_37310763_ranked
RUFY4	0	0	0	0	0	0	0	0	0	0	0	0	0	0	0	0	0	0	0	0	0	0	0	0	0	0	0	0	0	0	0	1.37976	1.41357	1.41096	1.41266	0	2.79333	SCRNASEQ: Hurskainen_33692365_endothelial, RNASEQ: Rao_37310763_ranked
STUM	0	0	0	0	0	0	0	0	0	0	0	0	0	0	0	0	0	0	0	0	0	0	0	0	0	0	0	0	0	0	0	1.38482	1.40647	1.40396	1.40434	0	2.79129	SCRNASEQ: Hurskainen_33692365_endothelial, RNASEQ: Rao_37310763_ranked
HIBCH	0	0	0	0	0	0	0	0	0	0	0	0	0	0	0	0	0	0	0	0	0	0	0	0	0	0	0	0	0	0	0	1.37559	1.41487	1.41229	1.41421	0	2.79047	SCRNASEQ: Hurskainen_33692365_endothelial, RNASEQ: Rao_37310763_ranked
CCDC9B	0	0	0	0	0	0	0	0	0	0	0	0	0	0	0	0	0	0	0	0	0	0	0	0	0	0	0	0	0	0	0	1.39302	1.39687	1.39462	1.39328	0	2.78989	SCRNASEQ: Hurskainen_33692365_endothelial, RNASEQ: Rao_37310763_ranked
RAG1	0	0	0	0	0	0	0	0	0	0	0	0	0	0	0	0	0	0	0	0	0	0	0	0	0	0	0	0	0	0	0	1.39152	1.398	1.39566	1.39459	0	2.78951	SCRNASEQ: Hurskainen_33692365_endothelial, RNASEQ: Rao_37310763_ranked
PYGB	0	0	0	0	0	0	0	0	0	0	0	0	0	0	0	0	0	0	0	0	0	0	0	0	0	0	0	0	0	0	0	1.39536	1.39362	1.39139	1.3895	0	2.78898	SCRNASEQ: Hurskainen_33692365_endothelial, RNASEQ: Rao_37310763_ranked
SBSPON	0	0	0	0	0	0	0	0	0	0	0	0	0	0	0	0	0	0	0	0	0	0	0	0	0	0	0	0	0	0	0	1.37198	1.41652	1.41389	1.41609	0	2.7885	SCRNASEQ: Hurskainen_33692365_endothelial, RNASEQ: Rao_37310763_ranked
ILDR2	0	0	0	0	0	0	0	0	0	0	0	0	0	0	0	0	0	0	0	0	0	0	0	0	0	0	0	0	0	0	0	1.37963	1.40788	1.40531	1.40599	0	2.7875	SCRNASEQ: Hurskainen_33692365_endothelial, RNASEQ: Rao_37310763_ranked
SPI1	0	0	0	0	0	0	0	0	0	0	0	0	0	0	0	0	0	0	0	0	0	0	0	0	0	0	0	0	0	0	0	1.38861	1.39854	1.39619	1.39521	0	2.78715	SCRNASEQ: Hurskainen_33692365_endothelial, RNASEQ: Rao_37310763_ranked
NPL	0	0	0	0	0	0	0	0	0	0	0	0	0	0	0	0	0	0	0	0	0	0	0	0	0	0	0	0	0	0	0	1.37813	1.40899	1.40638	1.40734	0	2.78712	SCRNASEQ: Hurskainen_33692365_endothelial, RNASEQ: Rao_37310763_ranked
EHMT1	0	0	0	0	0	0	0	0	0	0	0	0	0	0	0	0	0	0	0	0	0	0	0	0	0	0	0	0	0	0	0	1.38273	1.40418	1.40168	1.40169	0	2.78691	SCRNASEQ: Hurskainen_33692365_endothelial, RNASEQ: Rao_37310763_ranked
C1orf116	0	0	0	0	0	0	0	0	0	0	0	0	0	0	0	0	0	0	0	0	0	0	0	0	0	0	0	0	0	0	1.37591	1.37175	1.41061	1.40801	1.40924	0	2.78653	SCRNASEQ: Hurskainen_33692365_endothelial, RNASEQ: Nitkin_32753701_6hr_unranked
AFF3	0	0	0	0	0	0	0	0	0	0	0	0	0	0	0	0	0	0	0	0	0	0	0	0	0	0	0	0	0	0	0	1.3708	1.41557	1.41296	1.41499	0	2.78637	SCRNASEQ: Hurskainen_33692365_endothelial, RNASEQ: Rao_37310763_ranked
GPR35	0	0	0	0	0	0	0	0	0	0	0	0	0	0	0	0	0	0	0	0	0	0	0	0	0	0	0	0	0	0	0	1.37443	1.41169	1.40905	1.4105	0	2.78612	SCRNASEQ: Hurskainen_33692365_endothelial, RNASEQ: Rao_37310763_ranked
CHGB	0	0	0	0	0	0	0	0	0	0	0	0	0	0	0	0	0	0	0	0	0	0	0	0	0	0	0	0	0	0	0	1.39118	1.39447	1.39225	1.39055	0	2.78565	SCRNASEQ: Hurskainen_33692365_endothelial, RNASEQ: Rao_37310763_ranked
GIN1	0	0	0	0	0	0	0	0	0	0	0	0	0	0	0	0	0	0	0	0	0	0	0	0	0	0	0	0	0	0	0	1.37424	1.41137	1.40873	1.41013	0	2.78561	SCRNASEQ: Hurskainen_33692365_endothelial, RNASEQ: Rao_37310763_ranked
BFSP1	0	0	0	0	0	0	0	0	0	0	0	0	0	0	0	0	0	0	0	0	0	0	0	0	0	0	0	0	0	0	0	1.3914	1.39413	1.39192	1.39014	0	2.78553	SCRNASEQ: Hurskainen_33692365_endothelial, RNASEQ: Rao_37310763_ranked
TXNDC9	0	0	0	0	0	0	0	0	0	0	0	0	0	0	0	0	0	0	0	0	0	0	0	0	0	0	0	0	0	0	0	1.36882	1.41561	1.413	1.41503	0	2.78443	SCRNASEQ: Hurskainen_33692365_endothelial, RNASEQ: Rao_37310763_ranked
SDHAF4	0	0	0	0	0	0	0	0	0	0	0	0	0	0	0	0	0	0	0	0	0	0	0	0	0	0	0	0	0	0	0	1.36762	1.41616	1.41356	1.4157	0	2.78378	SCRNASEQ: Hurskainen_33692365_endothelial, RNASEQ: Rao_37310763_ranked
FCGR2A	0	0	0	0	0	0	0	0	0	0	0	0	0	0	0	0	0	0	0	0	0	0	0	0	0	0	0	0	0	0	1.37591	0	1.40753	1.40496	1.40558	0	2.78345	SCRNASEQ: Hurskainen_33692365_endothelial, RNASEQ: Nitkin_32753701_6hr_unranked
C1orf112	0	0	0	0	0	0	0	0	0	0	0	0	0	0	0	0	0	0	0	0	0	0	0	0	0	0	0	0	0	0	0	1.37487	1.4082	1.40559	1.40635	0	2.78308	SCRNASEQ: Hurskainen_33692365_endothelial, RNASEQ: Rao_37310763_ranked
TTLL4	0	0	0	0	0	0	0	0	0	0	0	0	0	0	0	0	0	0	0	0	0	0	0	0	0	0	0	0	0	0	0	1.36829	1.41333	1.41072	1.41238	0	2.78163	SCRNASEQ: Hurskainen_33692365_endothelial, RNASEQ: Rao_37310763_ranked
NEMP2	0	0	0	0	0	0	0	0	0	0	0	0	0	0	0	0	0	0	0	0	0	0	0	0	0	0	0	0	0	0	0	1.36535	1.41491	1.41233	1.41425	0	2.78026	SCRNASEQ: Hurskainen_33692365_endothelial, RNASEQ: Rao_37310763_ranked
CYP2J2	1.40112	0	0	0	0	0	0	0	0	0	0	0	0	0	0	0	0	0	0	0	0	0	0	0	0	0	0	0	0	0	0	1.37883	0	0	0	0	2.77995	GWAS: Nichols_24571919, RNASEQ: Rao_37310763_ranked
A630001G21Rik	0	0	0	0	0	0	0	0	0	0	0	0	0	0	0	0	0	0	0	0	0	0	0	0	0	0	0	0	0	0	0	1.36718	1.41249	1.40991	1.41148	0	2.77967	SCRNASEQ: Hurskainen_33692365_endothelial, RNASEQ: Rao_37310763_ranked
MSRB2	0	0	0	0	0	0	0	0	0	0	0	0	0	0	0	0	0	0	0	0	0	0	0	0	0	0	0	0	0	0	0	1.37518	1.40443	1.40196	1.40198	0	2.77961	SCRNASEQ: Hurskainen_33692365_endothelial, RNASEQ: Rao_37310763_ranked
STAU2	0	0	0	0	0	0	0	0	0	0	0	0	0	0	0	0	0	0	0	0	0	0	0	0	0	0	0	0	0	0	0	1.36286	1.41646	1.41384	1.41603	0	2.77933	SCRNASEQ: Hurskainen_33692365_endothelial, RNASEQ: Rao_37310763_ranked
CAMSAP1	0	0	0	0	0	0	0	0	0	0	0	0	0	0	0	0	0	0	0	0	0	0	0	0	0	0	0	0	0	0	0	1.37549	1.40359	1.40109	1.40101	0	2.77908	SCRNASEQ: Hurskainen_33692365_endothelial, RNASEQ: Rao_37310763_ranked
KIF5C	0	0	0	0	0	0	0	0	0	0	0	0	0	0	0	0	0	0	0	0	0	0	0	0	0	0	0	0	0	0	0	1.37751	1.40096	1.39854	1.39804	0	2.77847	SCRNASEQ: Hurskainen_33692365_endothelial, RNASEQ: Rao_37310763_ranked
ARID5A	0	0	0	0	0	0	0	0	0	0	0	0	0	0	0	0	0	0	0	0	0	0	0	0	0	0	0	0	0	0	0	1.36169	1.4159	1.41328	1.41536	0	2.77759	SCRNASEQ: Hurskainen_33692365_endothelial, RNASEQ: Rao_37310763_ranked
CNNM3	0	0	0	0	0	0	0	0	0	0	0	0	0	0	0	0	0	0	0	0	0	0	0	0	0	0	0	0	0	0	0	1.36167	1.41583	1.41323	1.41529	0	2.7775	SCRNASEQ: Hurskainen_33692365_endothelial, RNASEQ: Rao_37310763_ranked
RTN4RL2	0	0	0	0	0	0	0	0	0	0	0	0	0	0	0	0	0	0	0	0	0	0	0	0	0	0	0	0	0	0	0	1.37844	1.39894	0	1.39578	0	2.77739	SCRNASEQ: Hurskainen_33692365_endothelial, RNASEQ: Rao_37310763_ranked
DNER	0	0	0	0	0	0	0	0	0	0	0	0	0	0	0	0	0	0	0	0	0	0	0	0	0	0	0	0	0	0	0	1.36466	1.41257	1.40998	1.41157	0	2.77723	SCRNASEQ: Hurskainen_33692365_endothelial, RNASEQ: Rao_37310763_ranked
OPN3	0	0	0	0	0	0	0	0	0	0	0	0	0	0	0	0	0	0	0	0	0	0	0	0	0	0	0	0	0	0	0	1.37026	1.40677	1.40424	1.40467	0	2.77703	SCRNASEQ: Hurskainen_33692365_endothelial, RNASEQ: Rao_37310763_ranked
SLC9A2	0	0	0	0	0	0	0	0	0	0	0	0	0	0	0	0	0	0	0	0	0	0	0	0	0	0	0	0	0	0	0	1.36405	0	1.41273	0	0	2.77679	SCRNASEQ: Hurskainen_33692365_epithelial, RNASEQ: Rao_37310763_ranked
FMNL2	0	0	0	0	0	0	0	0	0	0	0	0	0	0	0	0	0	0	0	0	0	0	0	0	0	0	0	0	0	0	1.37591	0	1.40079	1.39838	1.39785	0	2.7767	SCRNASEQ: Hurskainen_33692365_endothelial, RNASEQ: Nitkin_32753701_6hr_unranked
GIGYF2	0	0	0	0	0	0	0	0	0	0	0	0	0	0	0	0	0	0	0	0	0	0	0	0	0	0	0	0	0	0	0	1.36424	1.41226	1.40968	1.41122	0	2.77649	SCRNASEQ: Hurskainen_33692365_endothelial, RNASEQ: Rao_37310763_ranked
HECW2	0	0	0	0	0	0	0	0	0	0	0	0	0	0	0	0	0	0	0	0	0	0	0	0	0	0	0	0	0	0	0	1.36167	1.41477	1.41219	1.41409	0	2.77644	SCRNASEQ: Hurskainen_33692365_endothelial, RNASEQ: Rao_37310763_ranked
ASTN1	0	0	0	0	0	0	0	0	0	0	0	0	0	0	0	0	0	0	0	0	0	0	0	0	0	0	0	0	0	0	0	1.36936	0	1.40603	1.40689	0	2.77625	SCRNASEQ: Hurskainen_33692365_stroma, RNASEQ: Rao_37310763_ranked
DHRS9	0	0	0	0	0	0	0	0	0	0	0	0	0	0	0	0	0	0	0	0	0	0	0	0	0	0	0	0	0	0	1.37591	0	1.40017	1.39779	1.39711	0	2.77608	SCRNASEQ: Hurskainen_33692365_endothelial, RNASEQ: Nitkin_32753701_6hr_unranked
IKZF2	0	0	0	0	0	0	0	0	0	0	0	0	0	0	0	0	0	0	0	0	0	0	0	0	0	0	0	0	0	0	0	1.36213	1.41375	1.41115	1.41287	0	2.77589	SCRNASEQ: Hurskainen_33692365_endothelial, RNASEQ: Rao_37310763_ranked
ATG9A	0	0	0	0	0	0	0	0	0	0	0	0	0	0	0	0	0	0	0	0	0	0	0	0	0	0	0	0	0	0	0	1.36244	1.41316	1.41057	1.41219	0	2.7756	SCRNASEQ: Hurskainen_33692365_endothelial, RNASEQ: Rao_37310763_ranked
VPS4B	0	0	0	0	0	0	0	0	0	0	0	0	0	0	0	0	0	0	0	0	0	0	0	0	0	0	0	0	0	0	0	1.36433	1.41123	1.40861	1.40997	0	2.77556	SCRNASEQ: Hurskainen_33692365_endothelial, RNASEQ: Rao_37310763_ranked
SLC19A3	0	0	0	0	0	0	0	0	0	0	0	0	0	0	0	0	0	0	0	0	0	0	0	0	0	0	0	0	0	0	0	1.36275	1.41264	1.41006	1.41163	0	2.77539	SCRNASEQ: Hurskainen_33692365_endothelial, RNASEQ: Rao_37310763_ranked
ERFE	0	0	0	0	0	0	0	0	0	0	0	0	0	0	0	0	0	0	0	0	0	0	0	0	0	0	0	0	0	0	0	1.363	1.41189	1.40926	1.41073	0	2.77489	SCRNASEQ: Hurskainen_33692365_endothelial, RNASEQ: Rao_37310763_ranked
CCM2L	0	0	0	0	0	0	0	0	0	0	0	0	0	0	0	0	0	0	0	0	0	0	0	0	0	0	0	0	0	0	0	1.38156	1.39313	1.39096	1.38894	0	2.77469	SCRNASEQ: Hurskainen_33692365_endothelial, RNASEQ: Rao_37310763_ranked
DIS3L2	0	0	0	0	0	0	0	0	0	0	0	0	0	0	0	0	0	0	0	0	0	0	0	0	0	0	0	0	0	0	0	1.36223	1.41231	1.40973	1.41128	0	2.77454	SCRNASEQ: Hurskainen_33692365_endothelial, RNASEQ: Rao_37310763_ranked
CUL3	0	0	0	0	0	0	0	0	0	0	0	0	0	0	0	0	0	0	0	0	0	0	0	0	0	0	0	0	0	0	0	1.3617	1.41276	1.41017	1.41174	0	2.77445	SCRNASEQ: Hurskainen_33692365_endothelial, RNASEQ: Rao_37310763_ranked
PER2	0	0	0	0	0	0	0	0	0	0	0	0	0	0	0	0	0	0	0	0	0	0	0	0	0	0	0	0	0	0	0	1.36236	1.41185	1.40922	1.41068	0	2.77421	SCRNASEQ: Hurskainen_33692365_endothelial, RNASEQ: Rao_37310763_ranked
STEAP3	0	0	0	0	0	0	0	0	0	0	0	0	0	0	0	0	0	0	0	0	0	0	0	0	0	0	0	0	0	0	0	1.36286	1.41097	1.40836	1.40966	0	2.77382	SCRNASEQ: Hurskainen_33692365_endothelial, RNASEQ: Rao_37310763_ranked
BCL2	0	0	0	0	0	0	0	0	0	0	0	0	0	0	0	0	0	0	0	0	0	0	0	0	0	0	0	0	0	0	0	1.3624	1.41126	1.40863	1.41	0	2.77365	SCRNASEQ: Hurskainen_33692365_endothelial, RNASEQ: Rao_37310763_ranked
ARL8A	0	0	0	0	0	0	0	0	0	0	0	0	0	0	0	0	0	0	0	0	0	0	0	0	0	0	0	0	0	0	0	1.36369	1.40985	1.40721	1.40834	0	2.77353	SCRNASEQ: Hurskainen_33692365_endothelial, RNASEQ: Rao_37310763_ranked
MGAT5	0	0	0	0	0	0	0	0	0	0	0	0	0	0	0	0	0	0	0	0	0	0	0	0	0	0	0	0	0	0	0	1.36256	1.41083	1.40822	1.4095	0	2.77339	SCRNASEQ: Hurskainen_33692365_endothelial, RNASEQ: Rao_37310763_ranked
BTG2	0	0	0	0	0	0	0	0	0	0	0	0	0	0	0	0	0	0	0	0	0	0	0	0	0	0	0	0	0	0	0	1.36272	1.41005	1.40742	1.40857	0	2.77277	SCRNASEQ: Hurskainen_33692365_endothelial, RNASEQ: Rao_37310763_ranked
FRZB	0	0	0	0	0	0	0	0	0	0	0	0	0	0	0	0	0	0	0	0	0	0	0	0	0	0	0	0	0	0	0	1.37349	1.39923	1.39689	1.3961	0	2.77273	SCRNASEQ: Hurskainen_33692365_endothelial, RNASEQ: Rao_37310763_ranked
MFSD4A	0	0	0	0	0	0	0	0	0	0	0	0	0	0	0	0	0	0	0	0	0	0	0	0	0	0	0	0	0	0	0	1.3619	1.41035	1.40775	1.40895	0	2.77225	SCRNASEQ: Hurskainen_33692365_endothelial, RNASEQ: Rao_37310763_ranked
B4GALT3	0	0	0	0	0	0	0	0	0	0	0	0	0	0	0	0	0	0	0	0	0	0	0	0	0	0	0	0	0	0	0	1.36465	1.40739	1.40482	1.40543	0	2.77204	SCRNASEQ: Hurskainen_33692365_endothelial, RNASEQ: Rao_37310763_ranked
MAMDC4	0	0	0	0	0	0	0	0	0	0	0	0	0	0	0	0	0	0	0	0	0	0	0	0	0	0	0	0	0	0	0	1.36809	1.40369	1.40119	1.40114	0	2.77179	SCRNASEQ: Hurskainen_33692365_endothelial, RNASEQ: Rao_37310763_ranked
BLOC1S6	0	0	0	0	0	0	0	0	0	0	0	0	0	0	0	0	0	0	0	0	0	0	0	0	0	0	0	0	0	0	0	1.37591	1.3958	1.39355	1.39204	0	2.77172	SCRNASEQ: Hurskainen_33692365_endothelial, RNASEQ: Rao_37310763_ranked
CD244	0	0	0	0	0	0	0	0	0	0	0	0	0	0	0	0	0	0	0	0	0	0	0	0	0	0	0	0	0	0	0	1.3645	1.4072	1.40464	1.40521	0	2.7717	SCRNASEQ: Hurskainen_33692365_endothelial, RNASEQ: Rao_37310763_ranked
IGSF8	0	0	0	0	0	0	0	0	0	0	0	0	0	0	0	0	0	0	0	0	0	0	0	0	0	0	0	0	0	0	0	1.36468	1.40701	1.40445	1.40498	0	2.77169	SCRNASEQ: Hurskainen_33692365_endothelial, RNASEQ: Rao_37310763_ranked
SELP	0	0	0	0	0	0	0	0	0	0	0	0	0	0	0	0	0	0	0	0	0	0	0	0	0	0	0	0	0	0	0	1.36282	1.40815	1.40555	1.40629	0	2.77097	SCRNASEQ: Hurskainen_33692365_endothelial, RNASEQ: Rao_37310763_ranked
KIFAP3	0	0	0	0	0	0	0	0	0	0	0	0	0	0	0	0	0	0	0	0	0	0	0	0	0	0	0	0	0	0	0	1.36213	1.40823	1.40561	1.40638	0	2.77036	SCRNASEQ: Hurskainen_33692365_endothelial, RNASEQ: Rao_37310763_ranked
KCNAB2	0	0	0	0	0	0	0	0	0	0	0	0	0	0	0	0	0	0	0	0	0	0	0	0	0	0	0	0	0	0	0	1.36197	1.40814	0	1.40628	0	2.77011	SCRNASEQ: Hurskainen_33692365_endothelial, RNASEQ: Rao_37310763_ranked
GPR161	0	0	0	0	0	0	0	0	0	0	0	0	0	0	0	0	0	0	0	0	0	0	0	0	0	0	0	0	0	0	0	1.36204	1.40801	1.40542	1.40614	0	2.77005	SCRNASEQ: Hurskainen_33692365_endothelial, RNASEQ: Rao_37310763_ranked
EXO1	0	0	0	0	0	0	0	0	0	0	0	0	0	0	0	0	0	0	0	0	0	0	0	0	0	0	0	0	0	0	0	1.36297	1.40674	1.40421	1.40464	0	2.76972	SCRNASEQ: Hurskainen_33692365_endothelial, RNASEQ: Rao_37310763_ranked
LAMC3	0	0	0	0	0	0	0	0	0	0	0	0	0	0	0	0	0	0	0	0	0	0	0	0	0	0	0	0	0	0	0	1.36744	1.40222	1.39979	1.39944	0	2.76966	SCRNASEQ: Hurskainen_33692365_endothelial, RNASEQ: Rao_37310763_ranked
SLC43A1	0	0	0	0	0	0	0	0	0	0	0	0	0	0	0	0	0	0	0	0	0	0	0	0	0	0	0	0	0	0	0	1.37052	1.39896	1.39662	1.39579	0	2.76948	SCRNASEQ: Hurskainen_33692365_endothelial, RNASEQ: Rao_37310763_ranked
SUV39H2	0	0	0	0	0	0	0	0	0	0	0	0	0	0	0	0	0	0	0	0	0	0	0	0	0	0	0	0	0	0	0	1.36386	1.40524	1.40275	1.40292	0	2.7691	SCRNASEQ: Hurskainen_33692365_endothelial, RNASEQ: Rao_37310763_ranked
FAM107B	0	0	0	0	0	0	0	0	0	0	0	0	0	0	0	0	0	0	0	0	0	0	0	0	0	0	0	0	0	0	0	1.36365	1.40521	1.40271	1.40288	0	2.76885	SCRNASEQ: Hurskainen_33692365_endothelial, RNASEQ: Rao_37310763_ranked
REXO4	0	0	0	0	0	0	0	0	0	0	0	0	0	0	0	0	0	0	0	0	0	0	0	0	0	0	0	0	0	0	0	1.36545	1.40326	1.40077	1.40064	0	2.76871	SCRNASEQ: Hurskainen_33692365_endothelial, RNASEQ: Rao_37310763_ranked
MAPKBP1	0	0	0	0	0	0	0	0	0	0	0	0	0	0	0	0	0	0	0	0	0	0	0	0	0	0	0	0	0	0	0	1.37159	1.39643	1.3942	1.39281	0	2.76803	SCRNASEQ: Hurskainen_33692365_endothelial, RNASEQ: Rao_37310763_ranked
SNAI1	0	0	0	0	0	0	0	0	0	0	0	0	0	0	0	0	0	0	0	0	0	0	0	0	0	0	0	0	0	0	0	1.37681	1.39099	0	0	0	2.76779	SCRNASEQ: Hurskainen_33692365_endothelial, RNASEQ: Rao_37310763_ranked
SURF2	0	0	0	0	0	0	0	0	0	0	0	0	0	0	0	0	0	0	0	0	0	0	0	0	0	0	0	0	0	0	0	1.36448	1.40329	1.40081	1.40069	0	2.76776	SCRNASEQ: Hurskainen_33692365_endothelial, RNASEQ: Rao_37310763_ranked
CDNF	0	0	0	0	0	0	0	0	0	0	0	0	0	0	0	0	0	0	0	0	0	0	0	0	0	0	0	0	0	0	0	1.36198	1.40522	1.40272	1.40289	0	2.7672	SCRNASEQ: Hurskainen_33692365_endothelial, RNASEQ: Rao_37310763_ranked
PTER	0	0	0	0	0	0	0	0	0	0	0	0	0	0	0	0	0	0	0	0	0	0	0	0	0	0	0	0	0	0	0	1.3624	1.40475	1.40226	1.40235	0	2.76714	SCRNASEQ: Hurskainen_33692365_endothelial, RNASEQ: Rao_37310763_ranked
ANKRD16	0	0	0	0	0	0	0	0	0	0	0	0	0	0	0	0	0	0	0	0	0	0	0	0	0	0	0	0	0	0	0	1.36169	1.40478	1.4023	1.4024	0	2.76648	SCRNASEQ: Hurskainen_33692365_endothelial, RNASEQ: Rao_37310763_ranked
DPP7	0	0	0	0	0	0	0	0	0	0	0	0	0	0	0	0	0	0	0	0	0	0	0	0	0	0	0	0	0	0	0	1.3623	1.40388	1.40137	1.40133	0	2.76618	SCRNASEQ: Hurskainen_33692365_endothelial, RNASEQ: Rao_37310763_ranked
NRARP	0	0	0	0	0	0	0	0	0	0	0	0	0	0	0	0	0	0	0	0	0	0	0	0	0	0	0	0	0	0	0	1.36184	1.40406	1.40156	1.40156	0	2.7659	SCRNASEQ: Hurskainen_33692365_endothelial, RNASEQ: Rao_37310763_ranked
FBXW5	0	0	0	0	0	0	0	0	0	0	0	0	0	0	0	0	0	0	0	0	0	0	0	0	0	0	0	0	0	0	0	1.36176	1.40373	1.40123	1.40118	0	2.76549	SCRNASEQ: Hurskainen_33692365_endothelial, RNASEQ: Rao_37310763_ranked
C8G	0	0	0	0	0	0	0	0	0	0	0	0	0	0	0	0	0	0	0	0	0	0	0	0	0	0	0	0	0	0	0	1.36168	1.40375	1.40124	1.40119	0	2.76543	SCRNASEQ: Hurskainen_33692365_endothelial, RNASEQ: Rao_37310763_ranked
SURF6	0	0	0	0	0	0	0	0	0	0	0	0	0	0	0	0	0	0	0	0	0	0	0	0	0	0	0	0	0	0	0	1.36172	1.40334	1.40086	1.40075	0	2.76505	SCRNASEQ: Hurskainen_33692365_endothelial, RNASEQ: Rao_37310763_ranked
ZBTB6	0	0	0	0	0	0	0	0	0	0	0	0	0	0	0	0	0	0	0	0	0	0	0	0	0	0	0	0	0	0	0	1.36359	1.40131	1.3989	1.39843	0	2.7649	SCRNASEQ: Hurskainen_33692365_endothelial, RNASEQ: Rao_37310763_ranked
CERCAM	0	0	0	0	0	0	0	0	0	0	0	0	0	0	0	0	0	0	0	0	0	0	0	0	0	0	0	0	0	0	0	1.36167	1.40276	1.40031	1.40005	0	2.76443	SCRNASEQ: Hurskainen_33692365_endothelial, RNASEQ: Rao_37310763_ranked
PHYHD1	0	0	0	0	0	0	0	0	0	0	0	0	0	0	0	0	0	0	0	0	0	0	0	0	0	0	0	0	0	0	0	1.36169	1.40257	1.40013	1.39985	0	2.76426	SCRNASEQ: Hurskainen_33692365_endothelial, RNASEQ: Rao_37310763_ranked
ASB6	0	0	0	0	0	0	0	0	0	0	0	0	0	0	0	0	0	0	0	0	0	0	0	0	0	0	0	0	0	0	0	1.36169	1.40243	1.39999	1.39969	0	2.76412	SCRNASEQ: Hurskainen_33692365_endothelial, RNASEQ: Rao_37310763_ranked
MYO3B	0	0	0	0	0	0	0	0	0	0	0	0	0	0	0	0	0	0	0	0	0	0	0	0	0	0	0	0	0	0	0	1.36411	1.40001	1.39764	1.39694	0	2.76412	SCRNASEQ: Hurskainen_33692365_endothelial, RNASEQ: Rao_37310763_ranked
POMT1	0	0	0	0	0	0	0	0	0	0	0	0	0	0	0	0	0	0	0	0	0	0	0	0	0	0	0	0	0	0	0	1.36179	1.40214	1.39971	1.39935	0	2.76393	SCRNASEQ: Hurskainen_33692365_endothelial, RNASEQ: Rao_37310763_ranked
DCAF17	0	0	0	0	0	0	0	0	0	0	0	0	0	0	0	0	0	0	0	0	0	0	0	0	0	0	0	0	0	0	0	1.36388	1.39992	1.39755	1.39683	0	2.76379	SCRNASEQ: Hurskainen_33692365_endothelial, RNASEQ: Rao_37310763_ranked
VPS18	0	0	0	0	0	0	0	0	0	0	0	0	0	0	0	0	0	0	0	0	0	0	0	0	0	0	0	0	0	0	0	1.36716	1.39663	1.39439	1.39302	0	2.76379	SCRNASEQ: Hurskainen_33692365_endothelial, RNASEQ: Rao_37310763_ranked
GOLGA2	0	0	0	0	0	0	0	0	0	0	0	0	0	0	0	0	0	0	0	0	0	0	0	0	0	0	0	0	0	0	0	1.36166	1.4021	1.39968	1.39931	0	2.76377	SCRNASEQ: Hurskainen_33692365_endothelial, RNASEQ: Rao_37310763_ranked
HOXD8	0	0	0	0	0	0	0	0	0	0	0	0	0	0	0	0	0	0	0	0	0	0	0	0	0	0	0	0	0	0	0	1.364	1.39959	1.39723	1.39649	0	2.76359	SCRNASEQ: Hurskainen_33692365_endothelial, RNASEQ: Rao_37310763_ranked
TTLL11	0	0	0	0	0	0	0	0	0	0	0	0	0	0	0	0	0	0	0	0	0	0	0	0	0	0	0	0	0	0	0	1.36195	1.40143	1.39901	1.39856	0	2.76338	SCRNASEQ: Hurskainen_33692365_endothelial, RNASEQ: Rao_37310763_ranked
SCN2A	0	0	0	0	0	0	0	0	0	0	0	0	0	0	0	0	0	0	0	0	0	0	0	0	0	0	0	0	0	0	0	1.36542	0	1.39792	1.39731	0	2.76334	SCRNASEQ: Hurskainen_33692365_epithelial, RNASEQ: Rao_37310763_ranked
SNHG11	0	0	0	0	0	0	0	0	0	0	0	0	0	0	0	0	0	0	0	0	0	0	0	0	0	0	0	0	0	0	0	1.37115	1.39207	1.3899	0	0	2.76322	SCRNASEQ: Hurskainen_33692365_endothelial, RNASEQ: Rao_37310763_ranked
ACVR1	0	0	0	0	0	0	0	0	0	0	0	0	0	0	0	0	0	0	0	0	0	0	0	0	0	0	0	0	0	0	0	1.36206	1.40067	1.39825	1.39769	0	2.76272	SCRNASEQ: Hurskainen_33692365_endothelial, RNASEQ: Rao_37310763_ranked
KAT14	0	0	0	0	0	0	0	0	0	0	0	0	0	0	0	0	0	0	0	0	0	0	0	0	0	0	0	0	0	0	0	1.3685	1.39405	1.39184	1.39005	0	2.76255	SCRNASEQ: Hurskainen_33692365_endothelial, RNASEQ: Rao_37310763_ranked
FAP	0	0	0	0	0	0	0	0	0	0	0	0	0	0	0	0	0	0	0	0	0	0	0	0	0	0	0	0	0	0	0	1.36169	1.40043	1.39802	1.39743	0	2.76212	SCRNASEQ: Hurskainen_33692365_endothelial, RNASEQ: Rao_37310763_ranked
GPR155	0	0	0	0	0	0	0	0	0	0	0	0	0	0	0	0	0	0	0	0	0	0	0	0	0	0	0	0	0	0	0	1.36171	1.39969	1.39733	1.39659	0	2.76141	SCRNASEQ: Hurskainen_33692365_endothelial, RNASEQ: Rao_37310763_ranked
PRKRA	0	0	0	0	0	0	0	0	0	0	0	0	0	0	0	0	0	0	0	0	0	0	0	0	0	0	0	0	0	0	0	1.36192	1.39944	1.39709	1.39633	0	2.76137	SCRNASEQ: Hurskainen_33692365_endothelial, RNASEQ: Rao_37310763_ranked
TTC30B	0	0	0	0	0	0	0	0	0	0	0	0	0	0	0	0	0	0	0	0	0	0	0	0	0	0	0	0	0	0	0	1.36181	1.39952	1.39717	1.39641	0	2.76134	SCRNASEQ: Hurskainen_33692365_endothelial, RNASEQ: Rao_37310763_ranked
GALNT5	0	0	0	0	0	0	0	0	0	0	0	0	0	0	0	0	0	0	0	0	0	0	0	0	0	0	0	0	0	0	0	1.36277	0	1.39829	1.39773	0	2.76106	SCRNASEQ: Hurskainen_33692365_epithelial, RNASEQ: Rao_37310763_ranked
EBF4	0	0	0	0	0	0	0	0	0	0	0	0	0	0	0	0	0	0	0	0	0	0	0	0	0	0	0	0	0	0	0	1.36605	1.39495	1.39271	1.39108	0	2.76099	SCRNASEQ: Hurskainen_33692365_endothelial, RNASEQ: Rao_37310763_ranked
NCKAP1	0	0	0	0	0	0	0	0	0	0	0	0	0	0	0	0	0	0	0	0	0	0	0	0	0	0	0	0	0	0	0	1.36173	1.39922	1.39687	1.39608	0	2.76096	SCRNASEQ: Hurskainen_33692365_endothelial, RNASEQ: Rao_37310763_ranked
MED19	0	0	0	0	0	0	0	0	0	0	0	0	0	0	0	0	0	0	0	0	0	0	0	0	0	0	0	0	0	0	0	1.36183	1.39905	1.39672	1.39591	0	2.76088	SCRNASEQ: Hurskainen_33692365_endothelial, RNASEQ: Rao_37310763_ranked
PLPPR3	0	0	0	0	0	0	0	0	0	0	0	0	0	0	0	0	0	0	0	0	0	0	0	0	0	0	0	0	0	0	0	1.36182	1.39892	0	0	0	2.76074	SCRNASEQ: Hurskainen_33692365_endothelial, RNASEQ: Rao_37310763_ranked
BUB1B	0	0	0	0	0	0	0	0	0	0	0	0	0	0	0	0	0	0	0	0	0	0	0	0	0	0	0	0	0	0	0	1.36373	1.39692	1.39467	1.39336	0	2.76065	SCRNASEQ: Hurskainen_33692365_endothelial, RNASEQ: Rao_37310763_ranked
SLC35C1	0	0	0	0	0	0	0	0	0	0	0	0	0	0	0	0	0	0	0	0	0	0	0	0	0	0	0	0	0	0	0	1.36222	1.39821	1.39587	1.39485	0	2.76043	SCRNASEQ: Hurskainen_33692365_endothelial, RNASEQ: Rao_37310763_ranked
PLA2G4F	0	0	0	0	0	0	0	0	0	0	0	0	0	0	0	0	0	0	0	0	0	0	0	0	0	0	0	0	0	0	0	1.36365	1.39639	1.39416	1.39275	0	2.76005	SCRNASEQ: Hurskainen_33692365_endothelial, RNASEQ: Rao_37310763_ranked
JMJD7	0	0	0	0	0	0	0	0	0	0	0	0	0	0	0	0	0	0	0	0	0	0	0	0	0	0	0	0	0	0	0	1.36308	1.39642	1.39418	1.39279	0	2.7595	SCRNASEQ: Hurskainen_33692365_endothelial, RNASEQ: Rao_37310763_ranked
CCDC34	0	0	0	0	0	0	0	0	0	0	0	0	0	0	0	0	0	0	0	0	0	0	0	0	0	0	0	0	0	0	0	1.36169	1.39742	1.3951	1.39392	0	2.75911	SCRNASEQ: Hurskainen_33692365_endothelial, RNASEQ: Rao_37310763_ranked
GATM	0	0	0	0	0	0	0	0	0	0	0	0	0	0	0	0	0	0	0	0	0	0	0	0	0	0	0	0	0	0	0	1.36322	1.39584	1.39359	1.39208	0	2.75906	SCRNASEQ: Hurskainen_33692365_endothelial, RNASEQ: Rao_37310763_ranked
HAUS2	0	0	0	0	0	0	0	0	0	0	0	0	0	0	0	0	0	0	0	0	0	0	0	0	0	0	0	0	0	0	0	1.36221	1.39629	1.39406	1.39263	0	2.75849	SCRNASEQ: Hurskainen_33692365_endothelial, RNASEQ: Rao_37310763_ranked
OIP5	0	0	0	0	0	0	0	0	0	0	0	0	0	0	0	0	0	0	0	0	0	0	0	0	0	0	0	0	0	0	0	1.36188	1.39655	1.39431	1.39294	0	2.75843	SCRNASEQ: Hurskainen_33692365_endothelial, RNASEQ: Rao_37310763_ranked
CEP152	0	0	0	0	0	0	0	0	0	0	0	0	0	0	0	0	0	0	0	0	0	0	0	0	0	0	0	0	0	0	0	1.36229	1.39571	1.39345	1.39192	0	2.758	SCRNASEQ: Hurskainen_33692365_endothelial, RNASEQ: Rao_37310763_ranked
AP5S1	0	0	0	0	0	0	0	0	0	0	0	0	0	0	0	0	0	0	0	0	0	0	0	0	0	0	0	0	0	0	0	1.36309	1.39466	1.39243	1.39075	0	2.75774	SCRNASEQ: Hurskainen_33692365_endothelial, RNASEQ: Rao_37310763_ranked
UBOX5	0	0	0	0	0	0	0	0	0	0	0	0	0	0	0	0	0	0	0	0	0	0	0	0	0	0	0	0	0	0	0	1.36275	1.39487	1.39262	1.39098	0	2.75762	SCRNASEQ: Hurskainen_33692365_endothelial, RNASEQ: Rao_37310763_ranked
HDC	0	0	0	0	0	0	0	0	0	0	0	0	0	0	0	0	0	0	0	0	0	0	0	0	0	0	0	0	0	0	0	1.36185	1.39556	1.39332	1.39178	0	2.75742	SCRNASEQ: Hurskainen_33692365_endothelial, RNASEQ: Rao_37310763_ranked
DUSP2	0	0	0	0	0	0	0	0	0	0	0	0	0	0	0	0	0	0	0	0	0	0	0	0	0	0	0	0	0	0	0	1.3617	1.39538	1.39314	1.39157	0	2.75708	SCRNASEQ: Hurskainen_33692365_endothelial, RNASEQ: Rao_37310763_ranked
PANK2	0	0	0	0	0	0	0	0	0	0	0	0	0	0	0	0	0	0	0	0	0	0	0	0	0	0	0	0	0	0	0	1.36245	1.39463	1.3924	1.39072	0	2.75708	SCRNASEQ: Hurskainen_33692365_endothelial, RNASEQ: Rao_37310763_ranked
SOX12	0	0	0	0	0	0	0	0	0	0	0	0	0	0	0	0	0	0	0	0	0	0	0	0	0	0	0	0	0	0	0	1.36291	1.39332	1.39113	1.38917	0	2.75623	SCRNASEQ: Hurskainen_33692365_endothelial, RNASEQ: Rao_37310763_ranked
SLC24A3	0	0	0	0	0	0	0	0	0	0	0	0	0	0	0	0	0	0	0	0	0	0	0	0	0	0	0	0	0	0	0	1.36218	1.39395	1.39174	1.38994	0	2.75613	SCRNASEQ: Hurskainen_33692365_endothelial, RNASEQ: Rao_37310763_ranked
CNBD2	0	0	0	0	0	0	0	0	0	0	0	0	0	0	0	0	0	0	0	0	0	0	0	0	0	0	0	0	0	0	0	1.36351	1.39242	1.39025	1.38808	0	2.75593	SCRNASEQ: Hurskainen_33692365_endothelial, RNASEQ: Rao_37310763_ranked
ZFP90	0	0	0	0	0	0	0	0	0	0	0	0	0	0	0	0	0	0	0	0	0	0	0	0	0	0	0	0	0	0	0	1.36508	1.39082	0	0	0	2.75589	SCRNASEQ: Hurskainen_33692365_endothelial, RNASEQ: Rao_37310763_ranked
OVOL2	0	0	0	0	0	0	0	0	0	0	0	0	0	0	0	0	0	0	0	0	0	0	0	0	0	0	0	0	0	0	0	1.3618	1.39407	1.39185	1.39007	0	2.75587	SCRNASEQ: Hurskainen_33692365_endothelial, RNASEQ: Rao_37310763_ranked
Zfp120	0	0	0	0	0	0	0	0	0	0	0	0	0	0	0	0	0	0	0	0	0	0	0	0	0	0	0	0	0	0	0	1.36186	1.3937	1.39148	1.38962	0	2.75556	SCRNASEQ: Hurskainen_33692365_endothelial, RNASEQ: Rao_37310763_ranked
ENTPD6	0	0	0	0	0	0	0	0	0	0	0	0	0	0	0	0	0	0	0	0	0	0	0	0	0	0	0	0	0	0	0	1.36177	1.39363	1.39141	1.38952	0	2.7554	SCRNASEQ: Hurskainen_33692365_endothelial, RNASEQ: Rao_37310763_ranked
PLAGL2	0	0	0	0	0	0	0	0	0	0	0	0	0	0	0	0	0	0	0	0	0	0	0	0	0	0	0	0	0	0	0	1.36208	1.39308	1.39091	1.38888	0	2.75516	SCRNASEQ: Hurskainen_33692365_endothelial, RNASEQ: Rao_37310763_ranked
MAFB	0	0	0	0	0	0	0	0	0	0	0	0	0	0	0	0	0	0	0	0	0	0	0	0	0	0	0	0	0	0	0	1.36171	1.39197	1.3898	0	0	2.75369	SCRNASEQ: Hurskainen_33692365_endothelial, RNASEQ: Rao_37310763_ranked
ADA	0	0	0	0	0	0	0	0	0	0	0	0	0	0	0	0	0	0	0	0	0	0	0	0	0	0	0	0	0	0	0	1.36185	1.39174	1.38955	0	0	2.75359	SCRNASEQ: Hurskainen_33692365_endothelial, RNASEQ: Rao_37310763_ranked
SLC39A12	0	0	0	0	0	0	0	0	0	0	0	0	0	0	0	0	0	0	0	0	0	0	0	0	1.29576	0	0	0	0	0	0	0	0	0	1.40219	0	2.69795	SCRNASEQ: Hurskainen_33692365_stroma, RNASEQ: Coarfa_28818871_male_up_day7
SELE	0	0	0	0	0	0	0	0	0	0	0	0	0	0	0	0	0	1.28849	0	0	0	0	0	0	0	0	0	0	0	0	0	0	1.40818	0	1.40632	0	2.69667	RNASEQ: Coarfa_28818871_female_down_day21_ranked, SCRNASEQ: Hurskainen_33692365_endothelial
SCN1A	0	0	0	0	0	0	0	0	0	0	0	0	0	0	0	0	0	1.28849	0	0	0	0	0	0	0	0	0	0	0	0	0	0	0	1.39788	1.39725	0	2.68637	SCRNASEQ: Hurskainen_33692365_epithelial, RNASEQ: Coarfa_28818871_female_down_day21_ranked
GHRH	0	0	0	0	0	0	0	0	0	0	0	0	0	0	0	0	0	0	0	0	1.24778	0	0	0	0	0	0	0	0	0	0	0	1.39221	1.39004	1.38785	0	2.63999	RNASEQ: Coarfa_28818871_female_up_day7_ranked, SCRNASEQ: Hurskainen_33692365_endothelial
UNC79	0	0	0	0	0	2.05786	0	0	0	0	0	0	0	0	0	0	0	0	0	0	0	0	0	0	0	0	0	0	0	0	0	0	0	0	0	0	2.05786	MICROARRAY: Denervaud_26353077_down_ranked
MMP3	0	0	0	0	0	0	0	0	1.99327	0	0	0	0	0	0	0	0	0	0	0	0	0	0	0	0	0	0	0	0	0	0	0	0	0	0	0	1.99327	MICROARRAY: Natarajan_28851267_up
LRRTM1	0	0	0	0	0	1.94664	0	0	0	0	0	0	0	0	0	0	0	0	0	0	0	0	0	0	0	0	0	0	0	0	0	0	0	0	0	0	1.94664	MICROARRAY: Denervaud_26353077_down_ranked
MYPN	0	0	0	0	0	1.93809	0	0	0	0	0	0	0	0	0	0	0	0	0	0	0	0	0	0	0	0	0	0	0	0	0	0	0	0	0	0	1.93809	MICROARRAY: Denervaud_26353077_down_ranked
FXYD5	0	0	0	0	0	0	0	0	0	0	0	0	0	0	0	1.90602	0	0	0	0	0	0	0	0	0	0	0	0	1.49636	0	0	0	0	0	0	0	1.90602	RNASEQ: Bhattacharya_25150061
FAM3B	0	0	0	0	0	1.90387	0	0	0	0	0	0	0	0	0	0	0	0	0	0	0	0	0	0	0	0	0	0	0	0	0	0	0	0	0	0	1.90387	MICROARRAY: Denervaud_26353077_down_ranked
Chil5	0	0	0	0	0	0	0	0	1.89779	0	0	0	0	0	0	0	0	0	0	0	0	0	0	0	0	0	0	0	0	0	0	0	0	0	0	0	1.89779	MICROARRAY: Natarajan_28851267_up
GSTA2	0	0	0	0	0	1.8782	0	0	0	0	0	0	0	0	0	0	0	0	0	0	0	0	0	0	0	0	0	0	0	0	0	0	0	0	0	0	1.8782	MICROARRAY: Denervaud_26353077_down_ranked
OSTN	0	0	0	0	0	1.86109	0	0	0	0	0	0	0	0	0	0	0	0	0	0	0	0	0	0	0	0	0	0	0	0	0	0	0	0	0	0	1.86109	MICROARRAY: Denervaud_26353077_down_ranked
MT2A	0	0	0	1.84727	0	0	1.69115	0	0	0	0	0	0	0	0	0	0	0	0	0	0	0	0	0	0	0	0	0	0	0	0	0	0	0	0	0	1.84727	MICROARRAY: Bhaskaran_22911455
MT3	0	0	0	1.84727	0	0	0	0	0	0	0	0	0	0	0	0	0	0	0	0	0	0	0	0	0	0	0	0	0	0	0	0	0	0	0	0	1.84727	MICROARRAY: Bhaskaran_22911455
Retnla	0	0	0	1.84727	0	0	1.69115	0	0	0	0	0	0	0	0	0	0	0	0	0	0	0	0	0	0	0	0	0	0	0	0	0	0	0	0	0	1.84727	MICROARRAY: Bhaskaran_22911455
FETUB	0	0	0	1.84727	0	0	0	0	0	0	0	0	0	0	0	0	0	0	0	0	0	0	0	0	0	0	0	0	0	0	0	0	0	0	0	0	1.84727	MICROARRAY: Bhaskaran_22911455
CLCA2	0	0	0	1.84727	0	0	0	0	0	0	0	0	0	0	0	0	0	0	0	0	0	0	0	0	0	0	0	0	0	0	0	0	0	0	0	0	1.84727	MICROARRAY: Bhaskaran_22911455
TAS2R1	0	0	0	1.84727	0	0	0	0	0	0	0	0	0	0	0	0	0	0	0	0	0	0	0	0	0	0	0	0	0	0	0	0	0	0	0	0	1.84727	MICROARRAY: Bhaskaran_22911455
AOC3	0	0	0	1.84727	0	0	0	0	0	0	0	0	0	0	0	0	0	0	0	0	0	0	0	0	0	0	0	0	0	0	0	0	0	0	0	0	1.84727	MICROARRAY: Bhaskaran_22911455
EBF1	0	0	0	1.84727	0	0	0	0	0	0	0	1.60682	0	0	0	0	0	0	0	0	0	0	0	0	0	0	0	0	0	0	0	0	0	0	0	0	1.84727	MICROARRAY: Bhaskaran_22911455
SEPTIN3	0	0	0	1.84727	0	0	0	0	0	0	0	0	0	0	0	0	0	0	0	0	0	0	0	0	0	0	0	0	0	0	0	0	0	0	0	0	1.84727	MICROARRAY: Bhaskaran_22911455
RAB3B	0	0	0	0	0	1.84398	0	0	0	0	0	0	0	0	0	0	0	0	0	0	0	0	0	0	0	0	0	0	0	0	0	0	0	0	0	0	1.84398	MICROARRAY: Denervaud_26353077_down_ranked
PLPPR1	0	0	0	0	0	1.83542	0	0	0	0	0	0	0	0	0	0	0	0	0	0	0	0	0	0	0	0	0	0	0	0	0	0	0	0	0	0	1.83542	MICROARRAY: Denervaud_26353077_down_ranked
Olfr1347	0	0	0	0	0	1.82687	0	0	0	0	0	0	0	0	0	0	0	0	0	0	0	0	0	0	0	0	0	0	0	0	0	0	0	0	0	0	1.82687	MICROARRAY: Denervaud_26353077_down_ranked
MINAR2	0	0	0	0	0	1.81831	0	0	0	0	0	0	0	0	0	0	0	0	0	0	0	0	0	0	0	0	0	0	0	0	0	0	0	0	0	0	1.81831	MICROARRAY: Denervaud_26353077_down_ranked
Olfr115	0	0	0	0	0	1.8012	0	0	0	0	0	0	0	0	0	0	0	0	0	0	0	0	0	0	0	0	0	0	0	0	0	0	0	0	0	0	1.8012	MICROARRAY: Denervaud_26353077_down_ranked
RBP7	0	0	0	0	0	1.78409	0	0	0	0	0	0	0	0	0	0	0	0	0	0	0	0	0	0	0	0	0	0	0	0	0	0	0	0	0	0	1.78409	MICROARRAY: Denervaud_26353077_down_ranked
CLIC2	0	0	0	0	0	1.77554	0	0	0	0	0	0	0	0	0	0	0	0	0	0	0	0	0	0	0	0	0	0	0	0	0	0	0	0	0	0	1.77554	MICROARRAY: Denervaud_26353077_down_ranked
Olr1418	0	0	0	0	0	1.76698	0	0	0	0	0	0	0	0	0	0	0	0	0	0	0	0	0	0	0	0	0	0	0	0	0	0	0	0	0	0	1.76698	MICROARRAY: Denervaud_26353077_down_ranked
CLEC10A	0	0	0	0	0	0	0	0	0	0	0	0	1.73795	0	0	0	0	0	0	0	0	0	0	0	0	0	0	0	0	0	0	0	0	0	0	0	1.73795	MICROARRAY: Shrestha_33446917_up
SGPP1	0	0	0	0	0	0	0	0	0	0	0	0	1.73795	0	0	0	0	0	0	0	0	0	0	0	0	0	0	0	0	0	0	0	0	0	0	0	1.73795	MICROARRAY: Shrestha_33446917_up
DCSTAMP	0	0	0	0	0	0	0	0	0	0	0	0	1.73795	0	0	0	0	0	0	0	0	0	0	0	0	0	0	0	0	0	0	0	0	0	0	0	1.73795	MICROARRAY: Shrestha_33446917_up
CCL17	0	0	0	0	0	0	0	0	0	0	1.619	0	1.73795	0	0	0	0	0	0	0	0	0	0	0	0	0	0	0	0	0	0	0	0	0	0	0	1.73795	MICROARRAY: Shrestha_33446917_up
A3GALT2	0	0	0	0	0	0	0	0	0	0	0	0	1.73795	0	0	0	0	0	0	0	0	0	0	0	0	0	0	0	0	0	0	0	0	0	0	0	1.73795	MICROARRAY: Shrestha_33446917_up
CCL22	0	0	0	0	0	0	0	0	0	0	0	0	1.73795	0	0	0	0	0	0	0	0	0	0	0	0	0	0	0	0	0	0	0	0	0	0	0	1.73795	MICROARRAY: Shrestha_33446917_up
MYL4	0	0	0	0	0	0	0	0	0	0	0	0	0	1.71206	1.44285	0	0	0	0	0	0	0	0	0	0	0	0	0	0	0	0	0	0	0	0	0	1.71206	RNASEQ: Al_mudares_37368978_female
ZMAT3	0	0	0	0	0	0	0	0	0	0	0	0	0	0	0	1.71151	0	0	0	0	0	0	0	0	0	0	0	0	1.6165	0	0	0	0	0	0	0	1.71151	RNASEQ: Bhattacharya_25150061
CD3E	0	0	0	0	0	0	0	0	0	0	0	1.69891	0	0	0	0	0	0	0	0	0	0	0	0	0	0	0	0	0	0	0	0	0	0	0	0	1.69891	MICROARRAY: Shrestha_33446917_down_
NKG7	0	0	0	0	0	0	1.69115	0	0	0	0	0	0	0	0	0	0	0	0	0	0	0	0	0	0	0	0	0	0	0	0	0	0	0	0	0	1.69115	MICROARRAY: Denervaud_26353077_up_ranked
PRF1	0	0	0	0	0	0	1.69115	0	0	0	0	0	0	0	0	0	0	0	0	0	0	0	0	0	0	0	0	0	0	0	0	0	0	0	0	0	1.69115	MICROARRAY: Denervaud_26353077_up_ranked
GZMK	0	0	0	0	0	0	1.69115	0	0	0	0	0	0	0	0	0	0	0	0	0	0	0	0	0	0	0	0	0	0	0	0	0	0	0	0	0	1.69115	MICROARRAY: Denervaud_26353077_up_ranked
Klri1	0	0	0	0	0	0	1.69115	0	0	0	0	0	0	0	0	0	0	0	0	0	0	0	0	0	0	0	0	0	0	0	0	0	0	0	0	0	1.69115	MICROARRAY: Denervaud_26353077_up_ranked
NCKAP1L	0	0	0	0	0	0	1.69115	0	0	0	0	0	0	0	0	0	0	0	0	0	0	0	0	0	0	0	0	0	0	0	0	0	0	0	0	0	1.69115	MICROARRAY: Denervaud_26353077_up_ranked
KLRK1	0	0	0	0	0	0	1.69115	0	0	0	0	0	0	0	0	0	0	0	0	0	0	0	0	0	0	0	0	0	0	0	0	0	0	0	0	0	1.69115	MICROARRAY: Denervaud_26353077_up_ranked
SPN	0	0	0	0	0	0	1.69115	0	0	1.60757	0	0	0	0	0	0	0	0	0	0	0	0	0	0	0	0	0	0	0	0	0	0	0	0	0	0	1.69115	MICROARRAY: Denervaud_26353077_up_ranked
IL12RB2	0	0	0	0	0	0	1.69115	0	0	0	0	0	0	0	0	0	0	0	0	0	0	0	0	0	0	0	0	0	0	0	0	0	0	0	0	0	1.69115	MICROARRAY: Denervaud_26353077_up_ranked
CD4	0	0	0	0	0	0	1.69115	0	0	0	0	0	0	0	0	0	0	0	0	0	0	0	0	0	0	0	0	0	0	0	0	0	0	0	0	0	1.69115	MICROARRAY: Denervaud_26353077_up_ranked
CXCR6	0	0	0	0	0	0	1.69115	0	0	0	0	0	0	0	0	0	0	0	0	0	0	0	0	0	0	0	0	0	0	0	0	0	0	0	0	0	1.69115	MICROARRAY: Denervaud_26353077_up_ranked
CD37	0	0	0	0	0	0	1.69115	0	0	0	0	0	0	0	0	0	0	0	0	0	0	0	0	0	0	0	0	0	0	0	0	0	0	0	0	0	1.69115	MICROARRAY: Denervaud_26353077_up_ranked
DOK2	0	0	0	0	0	0	1.69115	0	0	0	0	0	0	0	0	0	0	0	0	0	0	0	0	0	0	0	0	0	0	0	0	0	0	0	0	0	1.69115	MICROARRAY: Denervaud_26353077_up_ranked
CD8A	0	0	0	0	0	0	1.69115	0	0	0	0	1.63855	0	0	0	0	0	0	0	0	0	0	0	0	0	0	0	0	0	0	0	0	0	0	0	0	1.69115	MICROARRAY: Denervaud_26353077_up_ranked
Klrb1f	0	0	0	0	0	0	1.69115	0	0	0	0	0	0	0	0	0	0	0	0	0	0	0	0	0	0	0	0	0	0	0	0	0	0	0	0	0	1.69115	MICROARRAY: Denervaud_26353077_up_ranked
GZMM	0	0	0	0	0	0	1.69115	0	0	1.60762	0	0	0	0	0	0	0	0	0	0	0	0	0	0	0	0	0	0	0	0	0	0	0	0	0	0	1.69115	MICROARRAY: Denervaud_26353077_up_ranked
ACAP1	0	0	0	0	0	0	1.69115	0	0	0	0	0	0	0	0	0	0	0	0	0	0	0	0	0	0	0	0	0	0	0	0	0	0	0	0	0	1.69115	MICROARRAY: Denervaud_26353077_up_ranked
WAS	0	0	0	0	0	0	1.69115	0	0	0	0	0	0	0	0	0	0	0	0	0	0	0	0	0	0	0	0	0	0	0	0	0	0	0	0	0	1.69115	MICROARRAY: Denervaud_26353077_up_ranked
SLA	0	0	0	0	0	0	1.69115	0	0	0	0	0	0	0	0	0	0	0	0	0	0	0	0	0	0	0	0	0	0	0	0	0	0	0	0	0	1.69115	MICROARRAY: Denervaud_26353077_up_ranked
GPR171	0	0	0	0	0	0	1.69115	0	0	0	0	0	0	0	0	0	0	0	0	0	0	0	0	0	0	0	0	0	0	0	0	0	0	0	0	0	1.69115	MICROARRAY: Denervaud_26353077_up_ranked
CMAHP	0	0	0	0	0	0	1.69115	0	0	0	0	0	0	0	0	0	0	0	0	0	0	0	0	0	0	0	0	0	0	0	0	0	0	0	0	0	1.69115	MICROARRAY: Denervaud_26353077_up_ranked
CLNK	0	0	0	0	0	0	1.69115	0	0	0	0	0	0	0	0	0	0	0	0	0	0	0	0	0	0	0	0	0	0	0	0	0	0	0	0	0	1.69115	MICROARRAY: Denervaud_26353077_up_ranked
CD79B	0	0	0	0	0	0	1.69115	0	0	1.60757	0	0	0	0	0	0	0	0	0	0	0	0	0	0	0	0	0	0	0	0	0	0	0	0	0	0	1.69115	MICROARRAY: Denervaud_26353077_up_ranked
Gm4758	0	0	0	0	0	0	1.69115	0	0	0	0	0	0	0	0	0	0	0	0	0	0	0	0	0	0	0	0	0	0	0	0	0	0	0	0	0	1.69115	MICROARRAY: Denervaud_26353077_up_ranked
KLRD1	0	0	0	0	0	0	1.69115	0	0	0	0	0	0	0	0	0	0	0	0	0	0	0	0	0	0	0	0	0	0	0	0	0	0	0	0	0	1.69115	MICROARRAY: Denervaud_26353077_up_ranked
KLRG1	0	0	0	0	0	0	1.69115	0	0	0	0	0	0	0	0	0	0	0	0	0	0	0	0	0	0	0	0	0	0	0	0	0	0	0	0	0	1.69115	MICROARRAY: Denervaud_26353077_up_ranked
TBX21	0	0	0	0	0	0	1.69115	0	0	0	0	0	0	0	0	0	0	0	0	0	0	0	0	0	0	0	0	0	0	0	0	0	0	0	0	0	1.69115	MICROARRAY: Denervaud_26353077_up_ranked
PRTN3	0	0	0	0	0	0	1.69115	0	0	0	0	0	0	0	0	0	0	0	0	0	0	0	0	0	0	0	0	0	0	0	0	0	0	0	0	0	1.69115	MICROARRAY: Denervaud_26353077_up_ranked
Gm12253	0	0	0	0	0	0	1.69115	0	0	0	0	0	0	0	0	0	0	0	0	0	0	0	0	0	0	0	0	0	0	0	0	0	0	0	0	0	1.69115	MICROARRAY: Denervaud_26353077_up_ranked
F5	0	0	0	0	0	0	1.69115	0	0	0	0	0	0	0	0	0	0	0	0	0	0	0	0	0	0	0	0	0	0	0	0	0	0	0	0	0	1.69115	MICROARRAY: Denervaud_26353077_up_ranked
C1S	0	0	0	0	0	0	1.69115	0	0	0	0	0	0	0	0	0	0	0	0	0	0	0	0	0	0	0	0	0	0	0	0	0	0	0	0	0	1.69115	MICROARRAY: Denervaud_26353077_up_ranked
LCK	0	0	0	0	0	0	1.69115	0	0	0	0	0	0	0	0	0	0	0	0	0	0	0	0	0	0	0	0	0	0	0	0	0	0	0	0	0	1.69115	MICROARRAY: Denervaud_26353077_up_ranked
TXK	0	0	0	0	0	0	1.69115	0	0	1.60757	0	0	0	0	0	0	0	0	0	0	0	0	0	0	0	0	0	0	0	0	0	0	0	0	0	0	1.69115	MICROARRAY: Denervaud_26353077_up_ranked
JCHAIN	0	0	0	0	0	0	1.69115	0	0	0	0	0	0	0	0	0	0	0	0	0	0	0	0	0	0	0	0	0	0	0	0	0	0	0	0	0	1.69115	MICROARRAY: Denervaud_26353077_up_ranked
KLRC3	0	0	0	0	0	0	1.69115	0	0	0	0	0	0	0	0	0	0	0	0	0	0	0	0	0	0	0	0	0	0	0	0	0	0	0	0	0	1.69115	MICROARRAY: Denervaud_26353077_up_ranked
STAP1	0	0	0	0	0	0	1.69115	0	0	0	0	0	0	0	0	0	0	0	0	0	0	0	0	0	0	0	0	0	0	0	0	0	0	0	0	0	1.69115	MICROARRAY: Denervaud_26353077_up_ranked
IKZF3	0	0	0	0	0	0	1.69115	0	0	0	0	0	0	0	0	0	0	0	0	0	0	0	0	0	0	0	0	0	0	0	0	0	0	0	0	0	1.69115	MICROARRAY: Denervaud_26353077_up_ranked
SH2D1A	0	0	0	0	0	0	1.69115	0	0	0	0	0	0	0	0	0	0	0	0	0	0	0	0	0	0	0	0	0	0	0	0	0	0	0	0	0	1.69115	MICROARRAY: Denervaud_26353077_up_ranked
FOLR2	0	0	0	0	0	0	1.69115	0	0	0	0	0	0	0	0	0	0	0	0	0	0	0	0	0	0	0	0	0	0	0	0	0	0	0	0	0	1.69115	MICROARRAY: Denervaud_26353077_up_ranked
EBI3	0	0	0	0	0	0	1.69115	0	0	0	0	0	0	0	0	0	0	0	0	0	0	0	0	0	0	0	0	0	0	0	0	0	0	0	0	0	1.69115	MICROARRAY: Denervaud_26353077_up_ranked
FCGR1A	0	0	0	0	0	0	1.69115	0	0	0	0	0	0	0	0	0	0	0	0	0	0	0	0	0	0	0	0	0	0	0	0	0	0	0	0	0	1.69115	MICROARRAY: Denervaud_26353077_up_ranked
ORM1	0	0	0	0	0	0	1.69115	0	0	0	0	0	0	0	0	0	0	0	0	0	0	0	0	0	0	0	0	0	0	0	0	0	0	0	0	0	1.69115	MICROARRAY: Denervaud_26353077_up_ranked
MS4A3	0	0	0	0	0	0	1.69115	0	0	0	0	0	0	0	0	0	0	0	0	0	0	0	0	0	0	0	0	0	0	0	0	0	0	0	0	0	1.69115	MICROARRAY: Denervaud_26353077_up_ranked
MS4A12	0	0	0	0	0	0	1.69115	0	0	0	0	0	0	0	0	0	0	0	0	0	0	0	0	0	0	0	0	0	0	0	0	0	0	0	0	0	1.69115	MICROARRAY: Denervaud_26353077_up_ranked
PLA2G2A	0	0	0	0	0	0	1.69115	0	0	0	0	0	0	0	0	0	0	0	0	0	0	0	0	0	0	0	0	0	0	0	0	0	0	0	0	0	1.69115	MICROARRAY: Denervaud_26353077_up_ranked
CEACAM4	0	0	0	0	0	0	1.69115	0	0	0	0	0	0	0	0	0	0	0	0	0	0	0	0	0	0	0	0	0	0	0	0	0	0	0	0	0	1.69115	MICROARRAY: Denervaud_26353077_up_ranked
Fcrls	0	0	0	0	0	0	1.69115	0	0	0	0	0	0	0	0	0	0	0	0	0	0	0	0	0	0	0	0	0	0	0	0	0	0	0	0	0	1.69115	MICROARRAY: Denervaud_26353077_up_ranked
CLCA3P	0	0	0	0	0	0	1.69115	0	0	0	0	0	0	0	0	0	0	0	0	0	0	0	0	0	0	0	0	0	0	0	0	0	0	0	0	0	1.69115	MICROARRAY: Denervaud_26353077_up_ranked
CYP2A6	0	0	0	0	0	0	1.69115	0	0	0	0	0	0	0	0	0	0	0	0	0	0	0	0	0	0	0	0	0	0	0	0	0	0	0	0	0	1.69115	MICROARRAY: Denervaud_26353077_up_ranked
Defa11	0	0	0	0	0	0	1.69115	0	0	0	0	0	0	0	0	0	0	0	0	0	0	0	0	0	0	0	0	0	0	0	0	0	0	0	0	0	1.69115	MICROARRAY: Denervaud_26353077_up_ranked
Klri2	0	0	0	0	0	0	1.69115	0	0	0	0	0	0	0	0	0	0	0	0	0	0	0	0	0	0	0	0	0	0	0	0	0	0	0	0	0	1.69115	MICROARRAY: Denervaud_26353077_up_ranked
RHAG	0	0	0	0	0	0	1.69115	0	0	0	0	0	0	0	0	0	0	0	0	0	0	0	0	0	0	0	0	0	0	0	0	0	0	0	0	0	1.69115	MICROARRAY: Denervaud_26353077_up_ranked
CD163	0	0	0	0	0	0	1.69115	0	0	0	0	0	0	0	0	0	0	0	0	0	0	0	0	0	0	0	0	0	0	0	0	0	0	0	0	0	1.69115	MICROARRAY: Denervaud_26353077_up_ranked
Kng1	0	0	1.56066	0	0	0	1.69115	0	0	0	0	0	0	0	0	0	0	0	0	0	0	0	0	0	0	0	0	0	0	0	0	0	0	0	0	0	1.69115	MICROARRAY: Denervaud_26353077_up_ranked
F2RL2	0	0	0	0	0	0	1.69115	0	0	0	0	0	0	0	0	0	0	0	0	0	0	0	0	0	0	0	0	0	0	0	0	0	0	0	0	0	1.69115	MICROARRAY: Denervaud_26353077_up_ranked
CA1	0	0	0	0	0	0	1.69115	0	0	0	0	0	0	0	0	0	0	0	0	0	0	0	0	0	0	0	0	0	0	0	0	0	0	0	0	0	1.69115	MICROARRAY: Denervaud_26353077_up_ranked
MUC5B	0	0	0	0	0	0	1.69115	0	0	0	0	0	0	0	0	0	0	0	0	0	0	0	0	0	0	0	0	0	0	0	0	0	0	0	0	0	1.69115	MICROARRAY: Denervaud_26353077_up_ranked
ACTB	0	0	0	0	0	0	0	0	0	0	0	0	0	0	0	0	0	0	0	0	0	0	0	0	0	0	0	0	0	0	0	0	0	0	0	1.68281	1.68281	SCRNASEQ: Scaffa_34417156_ranked
CD27	0	0	0	0	0	0	0	0	0	0	0	1.68223	0	0	0	0	0	0	0	0	0	0	0	0	0	0	0	0	0	0	0	0	0	0	0	0	1.68223	MICROARRAY: Shrestha_33446917_down_
SYTL2	0	0	0	0	0	0	0	0	0	0	0	0	0	1.67542	0	0	0	0	0	0	0	0	0	0	0	0	0	0	0	0	0	1.36264	0	0	0	0	1.67542	RNASEQ: Al_mudares_37368978_female
TRB	0	0	0	0	0	0	0	0	0	0	0	1.67053	0	0	0	0	0	0	0	0	0	0	0	0	0	0	0	0	0	0	0	0	0	0	0	0	1.67053	MICROARRAY: Shrestha_33446917_down_
AEN	0	0	0	0	0	0	0	0	0	0	0	0	0	0	0	0	0	0	0	0	0	0	0	0	0	0	0	0	1.65632	0	0	0	0	0	0	0	1.65632	RNASEQ: Hirani_37876024
B2M	0	0	0	0	0	0	0	0	0	0	0	0	0	0	0	0	0	0	0	0	0	0	0	0	0	0	0	0	0	0	0	0	1.39591	1.39368	1.39218	1.65623	1.65623	SCRNASEQ: Scaffa_34417156_ranked
PSRC1	0	0	0	0	0	0	0	0	0	0	0	0	0	0	0	1.49302	0	0	0	0	0	0	0	0	0	0	0	0	1.6534	0	0	0	0	0	0	0	1.6534	RNASEQ: Hirani_37876024
CCNG1	0	0	0	0	0	0	0	0	0	0	0	0	0	0	0	1.49302	0	0	0	0	0	0	0	0	0	0	0	0	1.65196	0	0	0	0	0	0	0	1.65196	RNASEQ: Hirani_37876024
EDA2R	0	0	0	0	0	0	0	0	0	0	0	0	0	0	0	1.49302	0	0	0	0	0	0	0	0	0	0	0	0	1.6491	0	0	0	0	0	0	0	1.6491	RNASEQ: Hirani_37876024
KIT	0	0	0	0	0	0	0	0	0	0	0	0	0	0	1.44337	1.52537	0	0	0	0	0	0	0	0	0	0	0	0	1.64768	1.52158	0	0	0	0	0	0	1.64768	RNASEQ: Hirani_37876024
KCNK3	0	0	0	0	0	0	0	0	0	0	0	0	0	0	0	1.49302	0	0	0	0	0	0	0	0	0	0	0	0	1.64627	0	0	1.36278	0	0	0	0	1.64627	RNASEQ: Hirani_37876024
FAM81A	0	0	0	0	0	0	0	0	0	0	0	0	0	0	0	0	0	0	0	0	0	0	0	0	0	0	0	0	1.64488	0	0	0	0	0	0	0	1.64488	RNASEQ: Hirani_37876024
P4HA1	0	0	0	0	0	0	0	0	0	0	0	0	0	1.64397	0	0	0	0	0	0	0	0	0	0	0	0	0	0	0	0	0	0	0	0	0	0	1.64397	RNASEQ: Al_mudares_37368978_female
QRFPR	0	0	0	0	0	0	0	0	0	0	0	1.64351	0	0	0	0	0	0	0	0	0	0	0	0	0	0	0	0	0	0	0	0	0	0	0	0	1.64351	MICROARRAY: Shrestha_33446917_down_
HAMP	0	0	0	0	0	0	0	0	0	1.64187	0	0	0	0	0	0	0	0	0	0	0	0	0	0	0	0	0	0	0	0	0	0	0	0	0	0	1.64187	MICROARRAY: Revhaug_31454811_down_ranked
SERPINE1	0	0	0	0	0	0	0	0	0	0	0	0	0	0	0	0	0	0	0	0	0	0	0	0	0	0	0	0	1.64075	0	0	0	0	0	0	0	1.64075	RNASEQ: Hirani_37876024
RRAGD	0	0	0	0	0	0	0	0	0	0	0	0	0	0	0	0	0	0	0	0	0	0	0	0	0	0	0	0	1.6367	0	0	0	0	0	0	0	1.6367	RNASEQ: Hirani_37876024
TMEM255A	0	0	0	0	0	0	0	0	0	0	0	0	0	0	0	0	0	0	0	0	0	0	0	0	0	0	0	0	1.63405	0	0	1.36309	0	0	0	0	1.63405	RNASEQ: Hirani_37876024
MAL	0	0	0	0	0	0	0	0	0	0	0	1.63381	0	0	0	0	0	0	0	0	0	0	0	0	0	0	0	0	0	0	0	0	0	0	0	0	1.63381	MICROARRAY: Shrestha_33446917_down_
HLF	0	0	0	0	0	0	0	0	0	0	0	0	0	0	0	0	0	0	0	0	0	0	0	0	0	0	0	0	1.63274	0	0	1.37056	0	0	0	0	1.63274	RNASEQ: Hirani_37876024
TPM4	0	0	0	0	0	0	0	0	0	0	0	0	0	0	0	0	0	0	0	0	0	0	0	0	0	0	0	0	0	0	0	0	0	0	0	1.63271	1.63271	SCRNASEQ: Scaffa_34417156_ranked
COL5A3	0	0	0	0	0	0	0	0	0	0	0	0	0	0	0	1.49302	0	0	0	0	0	0	0	0	0	0	0	0	1.63144	0	0	1.37448	0	0	0	0	1.63144	RNASEQ: Hirani_37876024
Gimap9	0	0	0	0	0	0	0	0	0	0	0	1.62919	0	0	0	0	0	0	0	0	0	0	0	0	0	0	0	0	0	0	0	0	0	0	0	0	1.62919	MICROARRAY: Shrestha_33446917_down_
MMP10	0	0	0	0	0	0	0	0	0	0	0	0	0	0	0	0	0	0	0	0	0	0	0	0	0	0	0	0	1.62759	0	0	1.4078	0	0	0	0	1.62759	RNASEQ: Hirani_37876024
AKR1B10	0	0	0	0	0	0	0	0	0	0	0	0	0	0	0	0	0	0	0	0	0	0	0	0	0	0	0	0	1.62632	0	1.37591	0	0	0	0	0	1.62632	RNASEQ: Hirani_37876024
POLK	0	0	0	0	0	0	0	0	0	0	0	0	0	0	0	0	0	0	0	0	0	0	0	0	0	0	0	0	1.62506	0	0	0	0	0	0	0	1.62506	RNASEQ: Hirani_37876024
INHBA	0	0	0	0	0	0	0	0	0	0	0	0	0	0	0	0	0	0	0	0	0	0	0	0	0	0	0	0	1.62381	0	0	0	0	0	0	0	1.62381	RNASEQ: Hirani_37876024
IGSF1	0	0	0	0	0	0	0	0	0	1.62081	0	0	0	0	0	0	0	0	0	0	0	0	0	0	0	0	0	0	0	0	0	0	0	0	0	0	1.62081	MICROARRAY: Revhaug_31454811_down_ranked
CD207	0	0	0	0	0	0	0	0	0	0	1.619	0	0	0	0	0	0	0	0	0	0	0	0	0	0	0	0	0	0	0	0	0	0	0	0	0	1.619	MICROARRAY: Revhaug_31454811_up_ranked
GNG8	0	0	0	0	0	0	0	0	0	0	1.619	0	0	0	0	0	0	0	0	0	0	0	0	0	0	0	0	0	0	0	0	0	0	0	0	0	1.619	MICROARRAY: Revhaug_31454811_up_ranked
Prl2c5	0	0	0	0	0	0	0	0	0	0	1.619	0	0	0	0	0	0	0	0	0	0	0	0	0	0	0	0	0	0	0	0	0	0	0	0	0	1.619	MICROARRAY: Revhaug_31454811_up_ranked
ART4	0	0	0	0	0	0	0	0	0	0	1.619	0	0	0	0	0	0	0	0	0	0	0	0	0	0	0	0	0	0	0	0	0	0	0	0	0	1.619	MICROARRAY: Revhaug_31454811_up_ranked
IL12B	0	0	0	0	0	0	0	0	0	0	1.619	0	0	0	0	0	0	0	0	0	0	0	0	0	0	0	0	0	0	0	0	0	0	0	0	0	1.619	MICROARRAY: Revhaug_31454811_up_ranked
CD86	0	0	0	0	0	0	0	0	0	0	1.619	0	0	0	0	0	0	0	0	0	0	0	0	0	0	0	0	0	0	0	0	0	0	0	0	0	1.619	MICROARRAY: Revhaug_31454811_up_ranked
ITGAE	0	0	0	0	0	0	0	0	0	0	1.619	0	0	0	0	0	0	0	0	0	0	0	0	0	0	0	0	0	0	0	0	0	0	0	0	0	1.619	MICROARRAY: Revhaug_31454811_up_ranked
RAET1E	0	0	0	0	0	0	0	0	0	0	1.619	0	0	0	0	0	0	0	0	0	0	0	0	0	0	0	0	0	0	0	0	0	0	0	0	0	1.619	MICROARRAY: Revhaug_31454811_up_ranked
SCRN1	0	0	0	0	0	0	0	0	0	0	1.619	0	0	0	0	0	0	0	0	0	0	0	0	0	0	0	0	0	0	0	0	0	0	0	0	0	1.619	MICROARRAY: Revhaug_31454811_up_ranked
IRF8	0	0	0	0	0	0	0	0	0	0	1.619	0	0	0	0	0	0	0	0	0	0	0	0	0	0	0	0	0	0	0	0	0	0	0	0	0	1.619	MICROARRAY: Revhaug_31454811_up_ranked
CLEC2D	0	0	0	0	0	0	0	0	0	0	0	0	0	0	0	1.49302	0	0	0	0	0	0	0	0	0	0	0	0	1.6189	0	0	0	0	0	0	0	1.6189	RNASEQ: Hirani_37876024
ADCY8	0	0	0	0	0	0	0	0	0	0	0	0	0	0	0	1.49307	0	0	0	0	0	0	0	0	0	0	0	0	1.61413	0	0	0	0	0	0	0	1.61413	RNASEQ: Hirani_37876024
ART1	0	0	0	0	0	0	0	0	0	1.61269	0	0	0	0	0	0	0	0	0	0	0	0	0	0	0	0	0	0	0	0	0	0	0	0	0	0	1.61269	MICROARRAY: Revhaug_31454811_down_ranked
ENO3	0	0	0	0	0	0	0	0	0	0	0	1.61125	0	0	0	0	0	0	0	0	0	0	0	0	0	0	0	0	0	0	0	0	0	0	0	0	1.61125	MICROARRAY: Shrestha_33446917_down_
LIF	0	0	0	0	0	0	0	0	0	0	0	0	0	0	0	0	0	0	0	0	0	0	0	0	0	0	0	0	1.61063	0	0	0	0	0	0	0	1.61063	RNASEQ: Hirani_37876024
SLC66A3	0	0	0	0	0	0	0	0	0	0	0	0	0	0	0	1.6086	0	0	0	0	0	0	0	0	0	0	0	0	1.46785	0	0	0	0	0	0	0	1.6086	RNASEQ: Bhattacharya_25150061
CDK19	0	0	0	0	0	0	0	0	0	0	0	0	0	1.4441	0	0	0	0	0	0	0	0	0	0	0	0	0	0	1.60834	0	0	0	0	0	0	0	1.60834	RNASEQ: Hirani_37876024
FGF12	0	0	0	0	0	0	0	0	0	1.60834	0	0	0	0	0	0	0	0	0	0	0	0	0	0	0	0	0	0	0	0	0	0	0	0	0	0	1.60834	MICROARRAY: Revhaug_31454811_down_ranked
IGLC3	0	0	0	0	0	0	0	0	0	1.60769	0	0	0	0	0	0	0	0	0	0	0	0	0	0	0	0	0	0	0	0	0	0	0	0	0	0	1.60769	MICROARRAY: Revhaug_31454811_down_ranked
ASB11	0	0	0	0	0	0	0	0	0	1.60758	0	0	0	0	0	0	0	0	0	0	0	0	0	0	0	0	0	0	0	0	0	0	0	0	0	0	1.60758	MICROARRAY: Revhaug_31454811_down_ranked
POU2AF1	0	0	0	0	0	0	0	0	0	1.60757	0	0	0	0	0	0	0	0	0	0	0	0	0	0	0	0	0	0	0	0	0	0	0	0	0	0	1.60757	MICROARRAY: Revhaug_31454811_down_ranked
ASB10	0	0	0	0	0	0	0	0	0	1.60757	0	0	0	0	0	0	0	0	0	0	0	0	0	0	0	0	0	0	0	0	0	0	0	0	0	0	1.60757	MICROARRAY: Revhaug_31454811_down_ranked
CD19	0	0	0	0	0	0	0	0	0	1.60757	0	0	0	0	0	0	0	0	0	0	0	0	0	0	0	0	0	0	0	0	0	0	0	0	0	0	1.60757	MICROARRAY: Revhaug_31454811_down_ranked
MGST2	0	0	0	0	0	0	0	0	0	1.60757	0	0	0	0	0	0	0	0	0	0	0	0	0	0	0	0	0	0	0	0	0	0	0	0	0	0	1.60757	MICROARRAY: Revhaug_31454811_down_ranked
HCST	0	0	0	0	0	0	0	0	0	1.60757	0	0	0	0	0	0	0	0	0	0	0	0	0	0	0	0	0	0	0	0	0	0	0	0	0	0	1.60757	MICROARRAY: Revhaug_31454811_down_ranked
BLNK	0	0	0	0	0	0	0	0	0	1.60757	0	0	0	0	0	0	0	0	0	0	0	0	0	0	0	0	0	0	0	0	0	0	0	0	0	0	1.60757	MICROARRAY: Revhaug_31454811_down_ranked
EPOR	0	0	0	0	0	0	0	0	0	1.60757	0	0	0	0	0	0	0	0	0	0	0	0	0	0	0	0	0	0	0	0	0	0	0	0	0	0	1.60757	MICROARRAY: Revhaug_31454811_down_ranked
PRDM8	0	0	0	0	0	0	0	0	0	0	0	0	0	0	0	0	0	0	0	0	0	0	0	0	0	0	0	0	1.60721	0	0	0	0	0	0	0	1.60721	RNASEQ: Hirani_37876024
TBCEL	0	0	0	0	0	0	0	0	0	0	0	0	0	0	1.44426	0	1.60653	0	0	0	0	0	0	0	0	0	0	0	0	0	0	0	0	0	0	0	1.60653	RNASEQ: Cheng_31961470
CCNG2	0	0	0	0	0	0	0	0	0	0	0	0	0	1.44415	1.44409	0	0	0	0	0	0	0	0	0	0	0	0	0	1.60608	0	0	0	0	0	0	0	1.60608	RNASEQ: Hirani_37876024
SLC7A10	0	0	0	0	0	0	0	0	0	0	0	0	0	0	0	0	0	0	0	0	0	0	0	0	0	0	0	0	1.60497	0	0	0	0	0	0	0	1.60497	RNASEQ: Hirani_37876024
TEK	0	0	0	0	0	0	0	0	0	0	0	0	0	0	0	1.49302	0	0	0	0	0	0	0	0	0	0	0	0	1.60386	1.52158	0	1.39107	0	0	0	0	1.60386	RNASEQ: Hirani_37876024
CSPG4	0	0	0	0	0	0	0	0	0	0	0	0	0	0	0	0	0	0	0	0	0	0	0	0	0	0	0	0	1.60166	0	0	0	0	0	0	0	1.60166	RNASEQ: Hirani_37876024
DDIT3	0	0	0	0	0	0	0	0	0	0	0	0	0	0	0	0	0	0	0	0	0	0	0	0	0	0	0	0	1.60057	0	0	0	0	0	0	0	1.60057	RNASEQ: Hirani_37876024
MUSTN1	0	0	0	0	0	0	0	0	0	0	0	0	0	0	0	0	0	0	0	0	0	0	0	0	0	0	0	0	1.59842	0	0	0	0	0	0	0	1.59842	RNASEQ: Hirani_37876024
SEMA6C	0	0	0	0	0	0	0	0	0	0	0	0	0	0	0	0	0	0	0	0	0	0	0	0	0	0	0	0	1.59525	0	0	0	0	0	0	0	1.59525	RNASEQ: Hirani_37876024
MKI67	0	0	0	0	0	0	0	1.59486	0	0	0	0	0	0	0	0	0	0	0	0	0	0	0	0	0	0	0	0	0	0	0	0	0	0	0	0	1.59486	MICROARRAY: Natarajan_28851267_down
H2AC7	0	0	0	0	0	0	0	1.59486	0	0	0	0	0	0	0	0	0	0	0	0	0	0	0	0	0	0	0	0	0	0	0	0	0	0	0	0	1.59486	MICROARRAY: Natarajan_28851267_down
DEPDC1	0	0	0	0	0	0	0	1.59486	0	0	0	0	0	0	0	0	0	0	0	0	0	0	0	0	0	0	0	0	0	0	0	0	0	0	0	0	1.59486	MICROARRAY: Natarajan_28851267_down
H2AC4	0	0	0	0	0	0	0	1.59486	0	0	0	0	0	0	0	0	0	0	0	0	0	0	0	0	0	0	0	0	0	0	0	0	0	0	0	0	1.59486	MICROARRAY: Natarajan_28851267_down
GYPA	0	0	1.56066	0	0	0	0	1.59486	0	0	0	0	0	0	0	0	0	0	0	0	0	0	0	0	0	0	0	0	0	0	0	0	0	0	0	0	1.59486	MICROARRAY: Natarajan_28851267_down
LOXL4	0	0	0	0	0	0	0	0	0	0	0	0	0	0	0	1.49302	0	0	0	0	0	0	0	0	0	0	0	0	1.59317	0	0	1.37624	0	0	0	0	1.59317	RNASEQ: Hirani_37876024
CHODL	0	0	0	0	0	0	0	0	0	0	0	0	0	0	0	0	0	0	0	0	0	0	0	0	0	0	0	0	1.59214	0	0	0	0	0	0	0	1.59214	RNASEQ: Hirani_37876024
MDM2	0	0	0	0	0	0	0	0	0	0	0	0	0	0	0	1.49302	0	0	0	0	0	0	0	0	0	0	0	0	1.59112	0	0	0	0	0	0	0	1.59112	RNASEQ: Hirani_37876024
DDIT4L	0	0	0	0	0	0	0	0	0	0	0	0	0	0	0	0	0	0	0	0	0	0	0	0	0	0	0	0	1.59011	0	0	0	0	0	0	0	1.59011	RNASEQ: Hirani_37876024
CPA3	0	0	0	0	0	0	0	0	0	0	0	0	0	0	0	0	0	0	0	0	0	0	0	0	0	0	0	0	1.5891	0	0	0	0	0	0	0	1.5891	RNASEQ: Hirani_37876024
Tnfrsf26	0	0	0	0	0	0	0	0	0	0	0	0	0	0	0	0	0	0	0	0	0	0	0	0	0	0	0	0	1.5881	0	0	0	0	0	0	0	1.5881	RNASEQ: Hirani_37876024
NR2F1	0	0	0	0	0	0	0	0	0	0	0	0	0	0	0	1.49302	0	0	0	0	0	0	0	0	0	0	0	0	1.58711	0	0	0	0	0	0	0	1.58711	RNASEQ: Hirani_37876024
PLAU	0	0	0	0	0	0	0	0	0	0	0	0	0	0	0	0	0	0	0	0	0	0	0	0	0	0	0	0	1.58612	1.52158	0	0	0	0	0	0	1.58612	RNASEQ: Hirani_37876024
RPS7	0	0	0	0	0	0	0	0	0	0	0	0	0	0	0	0	0	0	0	0	0	0	0	0	0	0	0	0	0	0	0	0	0	0	0	1.58505	1.58505	SCRNASEQ: Scaffa_34417156_ranked
PLXDC1	0	0	0	0	0	0	0	0	0	0	0	0	0	0	0	1.49302	0	0	0	0	0	0	0	0	0	0	0	0	1.5832	0	0	0	0	0	0	0	1.5832	RNASEQ: Hirani_37876024
APLN	0	0	0	0	0	0	0	0	0	0	0	0	0	0	0	1.49302	0	0	0	0	0	0	0	0	0	0	0	0	1.58129	1.52158	0	0	0	0	0	0	1.58129	RNASEQ: Hirani_37876024
GPIHBP1	0	0	0	0	0	0	0	0	0	0	0	0	0	0	0	1.49302	0	0	0	0	0	0	0	0	0	0	0	0	1.57755	0	0	0	0	0	0	0	1.57755	RNASEQ: Hirani_37876024
CD1D	0	0	0	0	0	0	0	0	0	0	0	0	0	0	1.44434	0	0	0	0	0	0	0	0	0	0	0	0	0	1.57663	0	0	0	0	0	0	0	1.57663	RNASEQ: Hirani_37876024
NUP210	0	0	0	0	0	0	0	0	0	0	0	0	0	0	0	1.49302	0	0	0	0	0	0	0	0	0	0	0	0	1.57571	0	0	0	0	0	0	0	1.57571	RNASEQ: Hirani_37876024
DDHD1	0	0	0	0	0	0	0	0	0	0	0	0	0	0	1.57526	0	0	0	0	0	0	0	0	0	0	0	0	0	0	0	0	1.38872	0	0	0	0	1.57526	RNASEQ: Al_mudares_37368978_male
FAM162B	0	0	0	0	0	0	0	0	0	0	0	0	0	0	0	0	0	0	0	0	0	0	0	0	0	0	0	0	1.5739	0	0	0	0	0	0	0	1.5739	RNASEQ: Hirani_37876024
ZNF175	0	0	0	0	0	0	0	0	0	0	0	0	0	1.57388	0	0	0	0	0	0	0	0	0	0	0	0	0	0	0	0	0	0	0	0	0	0	1.57388	RNASEQ: Al_mudares_37368978_female
NPTX1	0	0	0	0	0	0	0	0	0	0	0	0	0	0	0	0	0	0	0	0	0	0	0	0	0	0	0	0	1.57124	0	0	0	0	0	0	0	1.57124	RNASEQ: Hirani_37876024
FAM13C	0	0	0	0	0	0	0	0	0	0	0	0	0	0	0	1.49302	0	0	0	0	0	0	0	0	0	0	0	0	1.57036	0	0	0	0	0	0	0	1.57036	RNASEQ: Hirani_37876024
Gm15483	0	0	0	0	0	0	0	0	0	0	0	0	0	0	0	0	0	0	0	0	0	0	0	0	0	0	0	0	0	0	0	0	0	0	0	1.5697	1.5697	SCRNASEQ: Scaffa_34417156_ranked
SLC7A11	0	0	0	0	0	0	0	0	0	0	0	0	0	0	0	0	0	0	0	0	0	0	0	0	0	0	0	0	1.56949	0	0	1.41956	0	0	0	0	1.56949	RNASEQ: Hirani_37876024
CXCL6	0	0	0	0	0	0	0	0	0	0	0	0	0	0	0	0	0	0	0	0	0	0	0	0	0	0	0	0	1.56862	0	0	1.36204	0	0	0	0	1.56862	RNASEQ: Hirani_37876024
EMID1	0	0	0	0	0	0	0	0	0	0	0	0	0	0	0	1.49302	0	0	0	0	0	0	0	0	0	0	0	0	1.56776	0	0	0	0	0	0	0	1.56776	RNASEQ: Hirani_37876024
TC2N	0	0	0	0	0	0	0	0	0	0	0	0	0	0	0	0	0	0	0	0	0	0	0	0	0	0	0	0	1.56522	0	0	0	0	0	0	0	1.56522	RNASEQ: Hirani_37876024
MAT1A	0	0	0	0	0	0	0	0	0	0	0	0	0	0	0	1.49302	0	0	0	0	0	0	0	0	0	0	0	0	1.56439	0	0	0	0	0	0	0	1.56439	RNASEQ: Hirani_37876024
SALL1	0	0	0	0	0	0	0	0	0	0	0	0	0	0	0	0	0	0	0	0	0	0	0	0	0	0	0	0	1.56273	0	0	0	0	0	0	0	1.56273	RNASEQ: Hirani_37876024
NTRK2	0	0	0	0	0	0	0	0	0	0	0	0	0	0	1.44408	0	0	0	0	0	0	0	0	0	0	0	0	0	1.56192	1.52158	0	0	0	0	0	0	1.56192	RNASEQ: Hirani_37876024
CYP3A4	0	0	1.56066	0	0	0	0	0	0	0	0	0	0	0	0	0	0	0	0	0	0	0	0	0	0	0	0	0	0	0	0	0	0	0	0	0	1.56066	MICROARRAY: Bao_27137150
SLC22A24	0	0	1.56066	0	0	0	0	0	0	0	0	0	0	0	0	0	0	0	0	0	0	0	0	0	0	0	0	0	0	0	0	0	0	0	0	0	1.56066	MICROARRAY: Bao_27137150
AMBP	0	0	1.56066	0	0	0	0	0	0	0	0	0	0	0	0	0	0	0	0	0	0	0	0	0	0	0	0	0	0	0	0	0	0	0	0	0	1.56066	MICROARRAY: Bao_27137150
AFP	0	0	1.56066	0	0	0	0	0	0	0	0	0	0	0	0	0	0	0	0	0	0	0	0	0	0	0	0	0	0	0	0	0	0	0	0	0	1.56066	MICROARRAY: Bao_27137150
AADAC	0	0	1.56066	0	0	0	0	0	0	0	0	0	0	0	0	0	0	0	0	0	0	0	0	0	0	0	0	0	0	0	0	0	0	0	0	0	1.56066	MICROARRAY: Bao_27137150
AKR1C4	0	0	1.56066	0	0	0	0	0	0	0	0	0	0	0	0	0	0	0	0	0	0	0	0	0	0	0	0	0	0	0	0	0	0	0	0	0	1.56066	MICROARRAY: Bao_27137150
Cyp4a14	0	0	1.56066	0	0	0	0	0	0	0	0	0	0	0	0	0	0	0	0	0	0	0	0	0	0	0	0	0	0	0	0	0	0	0	0	0	1.56066	MICROARRAY: Bao_27137150
OXGR1	0	0	1.56066	0	0	0	0	0	0	0	0	0	0	0	0	0	0	0	0	0	0	0	0	0	0	0	0	0	0	0	0	0	0	0	0	0	1.56066	MICROARRAY: Bao_27137150
AHSG	0	0	1.56066	0	0	0	0	0	0	0	0	0	0	0	0	0	0	0	0	0	0	0	0	0	0	0	0	0	0	0	0	0	0	0	0	0	1.56066	MICROARRAY: Bao_27137150
ALB	0	0	1.56066	0	0	0	0	0	0	0	0	0	0	0	0	0	0	0	0	0	0	0	0	0	0	0	0	0	0	0	0	0	0	0	0	0	1.56066	MICROARRAY: Bao_27137150
PCLAF	0	0	1.56066	0	0	0	0	0	0	0	0	0	0	0	0	0	0	0	0	0	0	0	0	0	0	0	0	0	0	0	0	0	0	0	0	0	1.56066	MICROARRAY: Bao_27137150
DSCC1	0	0	1.56066	0	0	0	0	0	0	0	0	0	0	0	0	0	0	0	0	0	0	0	0	0	0	0	0	0	0	0	0	0	0	0	0	0	1.56066	MICROARRAY: Bao_27137150
HIST1H1A	0	0	1.56066	0	0	0	0	0	0	0	0	0	0	0	0	0	0	0	0	0	0	0	0	0	0	0	0	0	0	0	0	0	0	0	0	0	1.56066	MICROARRAY: Bao_27137150
PBK	0	0	1.56066	0	0	0	0	0	0	0	0	0	0	0	0	0	0	0	0	0	0	0	0	0	0	0	0	0	0	0	0	0	0	0	0	0	1.56066	MICROARRAY: Bao_27137150
OR51E1	0	0	1.56066	0	0	0	0	0	0	0	0	0	0	0	0	0	0	0	0	0	0	0	0	0	0	0	0	0	0	0	0	0	0	0	0	0	1.56066	MICROARRAY: Bao_27137150
H3C13	0	0	1.56066	0	0	0	0	0	0	0	0	0	0	0	0	0	0	0	0	0	0	0	0	0	0	0	0	0	0	0	0	0	0	0	0	0	1.56066	MICROARRAY: Bao_27137150
CCNE2	0	0	1.56066	0	0	0	0	0	0	0	0	0	0	0	0	0	0	0	0	0	0	0	0	0	0	0	0	0	0	0	0	0	0	0	0	0	1.56066	MICROARRAY: Bao_27137150
VEPH1	0	0	1.56066	0	0	0	0	0	0	0	0	0	0	0	0	0	0	0	0	0	0	0	0	0	0	0	0	0	0	0	0	0	0	0	0	0	1.56066	MICROARRAY: Bao_27137150
NCAN	0	0	1.56066	0	0	0	0	0	0	0	0	0	0	0	0	0	0	0	0	0	0	0	0	0	0	0	0	0	0	0	0	0	0	0	0	0	1.56066	MICROARRAY: Bao_27137150
LRMDA	0	0	1.56066	0	0	0	0	0	0	0	0	0	0	0	0	0	0	0	0	0	0	0	0	0	0	0	0	0	0	0	0	0	0	0	0	0	1.56066	MICROARRAY: Bao_27137150
SMIM18	0	0	1.56066	0	0	0	0	0	0	0	0	0	0	0	0	0	0	0	0	0	0	0	0	0	0	0	0	0	0	0	0	0	0	0	0	0	1.56066	MICROARRAY: Bao_27137150
CBLN2	0	0	1.56066	0	0	0	0	0	0	0	0	0	0	0	0	0	0	0	0	0	0	0	0	0	0	0	0	0	0	0	0	0	0	0	0	0	1.56066	MICROARRAY: Bao_27137150
REG3G	0	0	1.56066	0	0	0	0	0	0	0	0	0	0	0	0	0	0	0	0	0	0	0	0	0	0	0	0	0	0	0	0	0	0	0	0	0	1.56066	MICROARRAY: Bao_27137150
BMERB1	0	0	1.56066	0	0	0	0	0	0	0	0	0	0	0	0	0	0	0	0	0	0	0	0	0	0	0	0	0	0	0	0	0	0	0	0	0	1.56066	MICROARRAY: Bao_27137150
BARHL2	0	0	1.56066	0	0	0	0	0	0	0	0	0	0	0	0	0	0	0	0	0	0	0	0	0	0	0	0	0	0	0	0	0	0	0	0	0	1.56066	MICROARRAY: Bao_27137150
NEUROD1	0	0	1.56066	0	0	0	0	0	0	0	0	0	0	0	0	0	0	0	0	0	0	0	0	0	0	0	0	0	0	0	0	0	0	0	0	0	1.56066	MICROARRAY: Bao_27137150
SAA1	0	0	1.56066	0	0	0	0	0	0	0	0	0	0	0	0	0	0	0	0	0	0	0	0	0	0	0	0	0	0	0	0	0	0	0	0	0	1.56066	MICROARRAY: Bao_27137150
FEZF1	0	0	1.56066	0	0	0	0	0	0	0	0	0	0	0	0	0	0	0	0	0	0	0	0	0	0	0	0	0	0	0	0	0	0	0	0	0	1.56066	MICROARRAY: Bao_27137150
NEUROD6	0	0	1.56066	0	0	0	0	0	0	0	0	0	0	0	0	0	0	0	0	0	0	0	0	0	0	0	0	0	0	0	0	0	0	0	0	0	1.56066	MICROARRAY: Bao_27137150
Cryge	0	0	1.56066	0	0	0	0	0	0	0	0	0	0	0	0	0	0	0	0	0	0	0	0	0	0	0	0	0	0	0	0	0	0	0	0	0	1.56066	MICROARRAY: Bao_27137150
SGK1	0	1.55983	0	0	0	0	0	0	0	0	0	0	0	0	0	0	0	0	0	0	0	0	0	0	0	0	0	0	0	0	0	0	0	0	0	0	1.55983	METHYLATION: Chen28689251
ECHDC1	0	1.55983	0	0	0	0	0	0	0	0	0	0	0	0	0	0	0	0	0	0	0	0	0	0	0	0	0	0	0	0	0	0	0	0	0	0	1.55983	METHYLATION: Chen28689251
RGS17	0	1.55983	0	0	0	0	0	0	0	0	0	0	0	0	0	0	0	0	0	0	0	0	0	0	0	0	0	0	0	0	0	0	0	0	0	0	1.55983	METHYLATION: Chen28689251
FBXO46	0	1.55983	0	0	0	0	0	0	0	0	0	0	0	0	0	0	0	0	0	0	0	0	0	0	0	0	0	0	0	0	0	0	0	0	0	0	1.55983	METHYLATION: Chen28689251
CERS3	0	1.55983	0	0	0	0	0	0	0	0	0	0	0	0	0	0	0	0	0	0	0	0	0	0	0	0	0	0	0	0	0	0	0	0	0	0	1.55983	METHYLATION: Chen28689251
FAM168A	0	1.55983	0	0	0	0	0	0	0	0	0	0	0	0	0	0	0	0	0	0	0	0	0	0	0	0	0	0	0	0	0	0	0	0	0	0	1.55983	METHYLATION: Chen28689251
PGAP2	0	1.55983	0	0	0	0	0	0	0	0	0	0	0	0	0	0	0	0	0	0	0	0	0	0	0	0	0	0	0	0	0	0	0	0	0	0	1.55983	METHYLATION: Chen28689251
TRIM6-TRIM34	0	1.55983	0	0	0	0	0	0	0	0	0	0	0	0	0	0	0	0	0	0	0	0	0	0	0	0	0	0	0	0	0	0	0	0	0	0	1.55983	METHYLATION: Chen28689251
SLC5A11	0	1.55983	0	0	0	0	0	0	0	0	0	0	0	0	0	0	0	0	0	0	0	0	0	0	0	0	0	0	0	0	0	0	0	0	0	0	1.55983	METHYLATION: Chen28689251
RCE1	0	1.55983	0	0	0	0	0	0	0	0	0	0	0	0	0	0	0	0	0	0	0	0	0	0	0	0	0	0	0	0	0	0	0	0	0	0	1.55983	METHYLATION: Chen28689251
SGMS1	0	1.55983	0	0	0	0	0	0	0	0	0	0	0	0	0	0	0	0	0	0	0	0	0	0	0	0	0	0	0	0	0	0	0	0	0	0	1.55983	METHYLATION: Chen28689251
GSTO2	0	1.55983	0	0	0	0	0	0	0	0	0	0	0	0	0	0	0	0	0	0	0	0	0	0	0	0	0	0	0	0	0	0	0	0	0	0	1.55983	METHYLATION: Chen28689251
SMNDC1	0	1.55983	0	0	0	0	0	0	0	0	0	0	0	0	0	0	0	0	0	0	0	0	0	0	0	0	0	0	0	0	0	0	0	0	0	0	1.55983	METHYLATION: Chen28689251
FBXW11	0	1.55983	0	0	0	0	0	0	0	0	0	0	0	0	0	0	0	0	0	0	0	0	0	0	0	0	0	0	0	0	0	0	0	0	0	0	1.55983	METHYLATION: Chen28689251
TENM2	0	1.55983	0	0	0	0	0	0	0	0	0	0	0	0	0	0	0	0	0	0	0	0	0	0	0	0	0	0	0	0	0	0	0	0	0	0	1.55983	METHYLATION: Chen28689251
DBIL5P	0	1.55983	0	0	0	0	0	0	0	0	0	0	0	0	0	0	0	0	0	0	0	0	0	0	0	0	0	0	0	0	0	0	0	0	0	0	1.55983	METHYLATION: Chen28689251
TNFAIP1	0	1.55983	0	0	0	0	0	0	0	0	0	0	0	0	0	0	0	0	0	0	0	0	0	0	0	0	0	0	0	0	0	0	0	0	0	0	1.55983	METHYLATION: Chen28689251
DUSP14	0	1.55983	0	0	0	0	0	0	0	0	0	0	0	0	0	0	0	0	0	0	0	0	0	0	0	0	0	0	0	0	0	0	0	0	0	0	1.55983	METHYLATION: Chen28689251
TTC25	0	1.55983	0	0	0	0	0	0	0	0	0	0	0	0	0	0	0	0	0	0	0	0	0	0	0	0	0	0	0	0	0	0	0	0	0	0	1.55983	METHYLATION: Chen28689251
HELZ	0	1.55983	0	0	0	0	0	0	0	0	0	0	0	0	0	0	0	0	0	0	0	0	0	0	0	0	0	0	0	0	0	0	0	0	0	0	1.55983	METHYLATION: Chen28689251
GRB2	0	1.55983	0	0	0	0	0	0	0	0	0	0	0	0	0	0	0	0	0	0	0	0	0	0	0	0	0	0	0	0	0	0	0	0	0	0	1.55983	METHYLATION: Chen28689251
IFNAR1	0	1.55983	0	0	0	0	0	0	0	0	0	0	0	0	0	0	0	0	0	0	0	0	0	0	0	0	0	0	0	0	0	0	0	0	0	0	1.55983	METHYLATION: Chen28689251
TMEM30C	0	1.55983	0	0	0	0	0	0	0	0	0	0	0	0	0	0	0	0	0	0	0	0	0	0	0	0	0	0	0	0	0	0	0	0	0	0	1.55983	METHYLATION: Chen28689251
IL1RAP	0	1.55983	0	0	0	0	0	0	0	0	0	0	0	0	0	0	0	0	0	0	0	0	0	0	0	0	0	0	0	0	0	0	0	0	0	0	1.55983	METHYLATION: Chen28689251
ELAVL1	0	1.55983	0	0	0	0	0	0	0	0	0	0	0	0	0	0	0	0	0	0	0	0	0	0	0	0	0	0	0	0	0	0	0	0	0	0	1.55983	METHYLATION: Chen28689251
GPR146	0	1.55983	0	0	0	0	0	0	0	0	0	0	0	0	0	0	0	0	0	0	0	0	0	0	0	0	0	0	0	0	0	0	0	0	0	0	1.55983	METHYLATION: Chen28689251
RPH3A	0	1.55983	0	0	0	0	0	0	0	0	0	0	0	0	0	0	0	0	0	0	0	0	0	0	0	0	0	0	0	0	0	0	0	0	0	0	1.55983	METHYLATION: Chen28689251
TPST2	0	1.55983	0	0	0	0	0	0	0	0	0	0	0	0	0	0	0	0	0	0	0	0	0	0	0	0	0	0	0	0	0	0	0	0	0	0	1.55983	METHYLATION: Chen28689251
PELI1	0	1.55983	0	0	0	0	0	0	0	0	0	0	0	0	0	0	0	0	0	0	0	0	0	0	0	0	0	0	0	0	0	0	0	0	0	0	1.55983	METHYLATION: Chen28689251
ABHD6	0	1.55983	0	0	0	0	0	0	0	0	0	0	0	0	0	0	0	0	0	0	0	0	0	0	0	0	0	0	0	0	0	0	0	0	0	0	1.55983	METHYLATION: Chen28689251
PNMA2	0	1.55983	0	0	0	0	0	0	0	0	0	0	0	0	0	0	0	0	0	0	0	0	0	0	0	0	0	0	0	0	0	0	0	0	0	0	1.55983	METHYLATION: Chen28689251
CBY2	0	1.55983	0	0	0	0	0	0	0	0	0	0	0	0	0	0	0	0	0	0	0	0	0	0	0	0	0	0	0	0	0	0	0	0	0	0	1.55983	METHYLATION: Chen28689251
ANXA11	0	1.55983	0	0	0	0	0	0	0	0	0	0	0	0	0	0	0	0	0	0	0	0	0	0	0	0	0	0	0	0	0	0	0	0	0	0	1.55983	METHYLATION: Chen28689251
NCOA4	0	1.55983	0	0	0	0	0	0	0	0	0	0	0	0	0	0	0	0	0	0	0	0	0	0	0	0	0	0	0	0	0	0	0	0	0	0	1.55983	METHYLATION: Chen28689251
SHLD2	0	1.55983	0	0	0	0	0	0	0	0	0	0	0	0	0	0	0	0	0	0	0	0	0	0	0	0	0	0	0	0	0	0	0	0	0	0	1.55983	METHYLATION: Chen28689251
RIPK1	0	1.55983	0	0	0	0	0	0	0	0	0	0	0	0	0	0	0	0	0	0	0	0	0	0	0	0	0	0	0	0	0	0	0	0	0	0	1.55983	METHYLATION: Chen28689251
LOC100505841	0	1.55983	0	0	0	0	0	0	0	0	0	0	0	0	0	0	0	0	0	0	0	0	0	0	0	0	0	0	0	0	0	0	0	0	0	0	1.55983	METHYLATION: Chen28689251
CTXN3	0	1.55983	0	0	0	0	0	0	0	0	0	0	0	0	0	0	0	0	0	0	0	0	0	0	0	0	0	0	0	0	0	0	0	0	0	0	1.55983	METHYLATION: Chen28689251
SLC14A2	0	1.55983	0	0	0	0	0	0	0	0	0	0	0	0	0	0	0	0	0	0	0	0	0	0	0	0	0	0	0	0	0	0	0	0	0	0	1.55983	METHYLATION: Chen28689251
SMAD1	0	1.55983	0	0	0	0	0	0	0	0	0	0	0	0	0	0	0	0	0	0	0	0	0	0	0	0	0	0	0	0	0	0	0	0	0	0	1.55983	METHYLATION: Chen28689251
TXNL4B	0	1.55983	0	0	0	0	0	0	0	0	0	0	0	0	0	0	0	0	0	0	0	0	0	0	0	0	0	0	0	0	0	0	0	0	0	0	1.55983	METHYLATION: Chen28689251
RGD1561161	0	1.55983	0	0	0	0	0	0	0	0	0	0	0	0	0	0	0	0	0	0	0	0	0	0	0	0	0	0	0	0	0	0	0	0	0	0	1.55983	METHYLATION: Chen28689251
CDH6	0	1.55983	0	0	0	0	0	0	0	0	0	0	0	0	0	0	0	0	0	0	0	0	0	0	0	0	0	0	0	0	0	0	0	0	0	0	1.55983	METHYLATION: Chen28689251
CSDE1	0	1.55983	0	0	0	0	0	0	0	0	0	0	0	0	0	0	0	0	0	0	0	0	0	0	0	0	0	0	0	0	0	0	0	0	0	0	1.55983	METHYLATION: Chen28689251
USP53	0	1.55983	0	0	0	0	0	0	0	0	0	0	0	0	0	0	0	0	0	0	0	0	0	0	0	0	0	0	0	0	0	0	0	0	0	0	1.55983	METHYLATION: Chen28689251
SPATA1	0	1.55983	0	0	0	0	0	0	0	0	0	0	0	0	0	0	0	0	0	0	0	0	0	0	0	0	0	0	0	0	0	0	0	0	0	0	1.55983	METHYLATION: Chen28689251
LRRIQ3	0	1.55983	0	0	0	0	0	0	0	0	0	0	0	0	0	0	0	0	0	0	0	0	0	0	0	0	0	0	0	0	0	0	0	0	0	0	1.55983	METHYLATION: Chen28689251
AGPAT3	0	1.55983	0	0	0	0	0	0	0	0	0	0	0	0	0	0	0	0	0	0	0	0	0	0	0	0	0	0	0	0	0	0	0	0	0	0	1.55983	METHYLATION: Chen28689251
CDC40	0	1.55983	0	0	0	0	0	0	0	0	0	0	0	0	0	0	0	0	0	0	0	0	0	0	0	0	0	0	0	0	0	0	0	0	0	0	1.55983	METHYLATION: Chen28689251
PCIF1	0	1.55983	0	0	0	0	0	0	0	0	0	0	0	0	0	0	0	0	0	0	0	0	0	0	0	0	0	0	0	0	0	0	0	0	0	0	1.55983	METHYLATION: Chen28689251
FAM126A	0	1.55983	0	0	0	0	0	0	0	0	0	0	0	0	0	0	0	0	0	0	0	0	0	0	0	0	0	0	0	0	0	0	0	0	0	0	1.55983	METHYLATION: Chen28689251
SPAM1	0	1.55983	0	0	0	0	0	0	0	0	0	0	0	0	0	0	0	0	0	0	0	0	0	0	0	0	0	0	0	0	0	0	0	0	0	0	1.55983	METHYLATION: Chen28689251
KBTBD2	0	1.55983	0	0	0	0	0	0	0	0	0	0	0	0	0	0	0	0	0	0	0	0	0	0	0	0	0	0	0	0	0	0	0	0	0	0	1.55983	METHYLATION: Chen28689251
ZNF638	0	1.55983	0	0	0	0	0	0	0	0	0	0	0	0	0	0	0	0	0	0	0	0	0	0	0	0	0	0	0	0	0	0	0	0	0	0	1.55983	METHYLATION: Chen28689251
KIAA0319L	0	1.55983	0	0	0	0	0	0	0	0	0	0	0	0	0	0	0	0	0	0	0	0	0	0	0	0	0	0	0	0	0	0	0	0	0	0	1.55983	METHYLATION: Chen28689251
HMGCL	0	1.55983	0	0	0	0	0	0	0	0	0	0	0	0	0	0	0	0	0	0	0	0	0	0	0	0	0	0	0	0	0	0	0	0	0	0	1.55983	METHYLATION: Chen28689251
HDAC9	0	1.55983	0	0	0	0	0	0	0	0	0	0	0	0	0	0	0	0	0	0	0	0	0	0	0	0	0	0	0	0	0	0	0	0	0	0	1.55983	METHYLATION: Chen28689251
TRAF3	0	1.55983	0	0	0	0	0	0	0	0	0	0	0	0	0	0	0	0	0	0	0	0	0	0	0	0	0	0	0	0	0	0	0	0	0	0	1.55983	METHYLATION: Chen28689251
CDK17	0	1.55983	0	0	0	0	0	0	0	0	0	0	0	0	0	0	0	0	0	0	0	0	0	0	0	0	0	0	0	0	0	0	0	0	0	0	1.55983	METHYLATION: Chen28689251
ALX1	0	1.55983	0	0	0	0	0	0	0	0	0	0	0	0	0	0	0	0	0	0	0	0	0	0	0	0	0	0	0	0	0	0	0	0	0	0	1.55983	METHYLATION: Chen28689251
SYT1	0	1.55983	0	0	0	0	0	0	0	0	0	0	0	0	0	0	0	0	0	0	0	0	0	0	0	0	0	0	0	0	0	0	0	0	0	0	1.55983	METHYLATION: Chen28689251
CNOT2	0	1.55983	0	0	0	0	0	0	0	0	0	0	0	0	0	0	0	0	0	0	0	0	0	0	0	0	0	0	0	0	0	0	0	0	0	0	1.55983	METHYLATION: Chen28689251
LRRC24	0	1.55983	0	0	0	0	0	0	0	0	0	0	0	0	0	0	0	0	0	0	0	0	0	0	0	0	0	0	0	0	0	0	0	0	0	0	1.55983	METHYLATION: Chen28689251
SOX10	0	1.55983	0	0	0	0	0	0	0	0	0	0	0	0	0	0	0	0	0	0	0	0	0	0	0	0	0	0	0	0	0	0	0	0	0	0	1.55983	METHYLATION: Chen28689251
TMEM184B	0	1.55983	0	0	0	0	0	0	0	0	0	0	0	0	0	0	0	0	0	0	0	0	0	0	0	0	0	0	0	0	0	0	0	0	0	0	1.55983	METHYLATION: Chen28689251
RANGAP1	0	1.55983	0	0	0	0	0	0	0	0	0	0	0	0	0	0	0	0	0	0	0	0	0	0	0	0	0	0	0	0	0	0	0	0	0	0	1.55983	METHYLATION: Chen28689251
TMEM45B	0	1.55983	0	0	0	0	0	0	0	0	0	0	0	0	0	0	0	0	0	0	0	0	0	0	0	0	0	0	0	0	0	0	0	0	0	0	1.55983	METHYLATION: Chen28689251
USP2	0	1.55983	0	0	0	0	0	0	0	0	0	0	0	0	0	0	0	0	0	0	0	0	0	0	0	0	0	0	0	0	0	0	0	0	0	0	1.55983	METHYLATION: Chen28689251
RAB27A	0	1.55983	0	0	0	0	0	0	0	0	0	0	0	0	0	0	0	0	0	0	0	0	0	0	0	0	0	0	0	0	0	0	0	0	0	0	1.55983	METHYLATION: Chen28689251
NMNAT3	0	1.55983	0	0	0	0	0	0	0	0	0	0	0	0	0	0	0	0	0	0	0	0	0	0	0	0	0	0	0	0	0	0	0	0	0	0	1.55983	METHYLATION: Chen28689251
MON1A	0	1.55983	0	0	0	0	0	0	0	0	0	0	0	0	0	0	0	0	0	0	0	0	0	0	0	0	0	0	0	0	0	0	0	0	0	0	1.55983	METHYLATION: Chen28689251
QRICH1	0	1.55983	0	0	0	0	0	0	0	0	0	0	0	0	0	0	0	0	0	0	0	0	0	0	0	0	0	0	0	0	0	0	0	0	0	0	1.55983	METHYLATION: Chen28689251
CCDC51	0	1.55983	0	0	0	0	0	0	0	0	0	0	0	0	0	0	0	0	0	0	0	0	0	0	0	0	0	0	0	0	0	0	0	0	0	0	1.55983	METHYLATION: Chen28689251
SCAP	0	1.55983	0	0	0	0	0	0	0	0	0	0	0	0	0	0	0	0	0	0	0	0	0	0	0	0	0	0	0	0	0	0	0	0	0	0	1.55983	METHYLATION: Chen28689251
CCDC12	0	1.55983	0	0	0	0	0	0	0	0	0	0	0	0	0	0	0	0	0	0	0	0	0	0	0	0	0	0	0	0	0	0	0	0	0	0	1.55983	METHYLATION: Chen28689251
TBC1D5	0	1.55983	0	0	0	0	0	0	0	0	0	0	0	0	0	0	0	0	0	0	0	0	0	0	0	0	0	0	0	0	0	0	0	0	0	0	1.55983	METHYLATION: Chen28689251
RCAN2	0	1.55983	0	0	0	0	0	0	0	0	0	0	0	0	0	0	0	0	0	0	0	0	0	0	0	0	0	0	0	0	0	0	0	0	0	0	1.55983	METHYLATION: Chen28689251
TRPM8	0	1.55983	0	0	0	0	0	0	0	0	0	0	0	0	0	0	0	0	0	0	0	0	0	0	0	0	0	0	0	0	0	0	0	0	0	0	1.55983	METHYLATION: Chen28689251
AA414768	0	1.55983	0	0	0	0	0	0	0	0	0	0	0	0	0	0	0	0	0	0	0	0	0	0	0	0	0	0	0	0	0	0	0	0	0	0	1.55983	METHYLATION: Chen28689251
BCOR	0	1.55983	0	0	0	0	0	0	0	0	0	0	0	0	0	0	0	0	0	0	0	0	0	0	0	0	0	0	0	0	0	0	0	0	0	0	1.55983	METHYLATION: Chen28689251
SMPX	0	1.55983	0	0	0	0	0	0	0	0	0	0	0	0	0	0	0	0	0	0	0	0	0	0	0	0	0	0	0	0	0	0	0	0	0	0	1.55983	METHYLATION: Chen28689251
DRP2	0	1.55983	0	0	0	0	0	0	0	0	0	0	0	0	0	0	0	0	0	0	0	0	0	0	0	0	0	0	0	0	0	0	0	0	0	0	1.55983	METHYLATION: Chen28689251
CLDN2	0	1.55983	0	0	0	0	0	0	0	0	0	0	0	0	0	0	0	0	0	0	0	0	0	0	0	0	0	0	0	0	0	0	0	0	0	0	1.55983	METHYLATION: Chen28689251
TENT4A	0	1.55983	0	0	0	0	0	0	0	0	0	0	0	0	0	0	0	0	0	0	0	0	0	0	0	0	0	0	0	0	0	0	0	0	0	0	1.55983	METHYLATION: Chen28689251
PAK4	0	1.55983	0	0	0	0	0	0	0	0	0	0	0	0	0	0	0	0	0	0	0	0	0	0	0	0	0	0	0	0	0	0	0	0	0	0	1.55983	METHYLATION: Chen28689251
SELENOV	0	1.55983	0	0	0	0	0	0	0	0	0	0	0	0	0	0	0	0	0	0	0	0	0	0	0	0	0	0	0	0	0	0	0	0	0	0	1.55983	METHYLATION: Chen28689251
CYFIP1	0	1.55983	0	0	0	0	0	0	0	0	0	0	0	0	0	0	0	0	0	0	0	0	0	0	0	0	0	0	0	0	0	0	0	0	0	0	1.55983	METHYLATION: Chen28689251
PGM2L1	0	1.55983	0	0	0	0	0	0	0	0	0	0	0	0	0	0	0	0	0	0	0	0	0	0	0	0	0	0	0	0	0	0	0	0	0	0	1.55983	METHYLATION: Chen28689251
FCHSD2	0	1.55983	0	0	0	0	0	0	0	0	0	0	0	0	0	0	0	0	0	0	0	0	0	0	0	0	0	0	0	0	0	0	0	0	0	0	1.55983	METHYLATION: Chen28689251
GANAB	0	1.55983	0	0	0	0	0	0	0	0	0	0	0	0	0	0	0	0	0	0	0	0	0	0	0	0	0	0	0	0	0	0	0	0	0	0	1.55983	METHYLATION: Chen28689251
TNIP1	0	1.55983	0	0	0	0	0	0	0	0	0	0	0	0	0	0	0	0	0	0	0	0	0	0	0	0	0	0	0	0	0	0	0	0	0	0	1.55983	METHYLATION: Chen28689251
LLGL2	0	1.55983	0	0	0	0	0	0	0	0	0	0	0	0	0	0	0	0	0	0	0	0	0	0	0	0	0	0	0	0	0	0	0	0	0	0	1.55983	METHYLATION: Chen28689251
ALCAM	0	1.55983	0	0	0	0	0	0	0	0	0	0	0	0	0	0	0	0	0	0	0	0	0	0	0	0	0	0	0	0	0	0	0	0	0	0	1.55983	METHYLATION: Chen28689251
PP2D1	0	1.55983	0	0	0	0	0	0	0	0	0	0	0	0	0	0	0	0	0	0	0	0	0	0	0	0	0	0	0	0	0	0	0	0	0	0	1.55983	METHYLATION: Chen28689251
CHD8	0	1.55983	0	0	0	0	0	0	0	0	0	0	0	0	0	0	0	0	0	0	0	0	0	0	0	0	0	0	0	0	0	0	0	0	0	0	1.55983	METHYLATION: Chen28689251
BMPR1A	0	1.55983	0	0	0	0	0	0	0	0	0	0	0	0	0	0	0	0	0	0	0	0	0	0	0	0	0	0	0	0	0	0	0	0	0	0	1.55983	METHYLATION: Chen28689251
OCEL1	0	1.55983	0	0	0	0	0	0	0	0	0	0	0	0	0	0	0	0	0	0	0	0	0	0	0	0	0	0	0	0	0	0	0	0	0	0	1.55983	METHYLATION: Chen28689251
DYM	0	1.55983	0	0	0	0	0	0	0	0	0	0	0	0	0	0	0	0	0	0	0	0	0	0	0	0	0	0	0	0	0	0	0	0	0	0	1.55983	METHYLATION: Chen28689251
DDX19B	0	1.55983	0	0	0	0	0	0	0	0	0	0	0	0	0	0	0	0	0	0	0	0	0	0	0	0	0	0	0	0	0	0	0	0	0	0	1.55983	METHYLATION: Chen28689251
SEMA5A	0	1.55983	0	0	0	0	0	0	0	0	0	0	0	0	0	0	0	0	0	0	0	0	0	0	0	0	0	0	0	0	0	0	0	0	0	0	1.55983	METHYLATION: Chen28689251
TBL1XR1	0	1.55983	0	0	0	0	0	0	0	0	0	0	0	0	0	0	0	0	0	0	0	0	0	0	0	0	0	0	0	0	0	0	0	0	0	0	1.55983	METHYLATION: Chen28689251
KCNA10	0	1.55983	0	0	0	0	0	0	0	0	0	0	0	0	0	0	0	0	0	0	0	0	0	0	0	0	0	0	0	0	0	0	0	0	0	0	1.55983	METHYLATION: Chen28689251
PHYHIPL	0	1.55983	0	0	0	0	0	0	0	0	0	0	0	0	0	0	0	0	0	0	0	0	0	0	0	0	0	0	0	0	0	0	0	0	0	0	1.55983	METHYLATION: Chen28689251
HS3ST5	0	1.55983	0	0	0	0	0	0	0	0	0	0	0	0	0	0	0	0	0	0	0	0	0	0	0	0	0	0	0	0	0	0	0	0	0	0	1.55983	METHYLATION: Chen28689251
SLC25A40	0	1.55983	0	0	0	0	0	0	0	0	0	0	0	0	0	0	0	0	0	0	0	0	0	0	0	0	0	0	0	0	0	0	0	0	0	0	1.55983	METHYLATION: Chen28689251
CDK14	0	1.55983	0	0	0	0	0	0	0	0	0	0	0	0	0	0	0	0	0	0	0	0	0	0	0	0	0	0	0	0	0	0	0	0	0	0	1.55983	METHYLATION: Chen28689251
SNX30	0	1.55983	0	0	0	0	0	0	0	0	0	0	0	0	0	0	0	0	0	0	0	0	0	0	0	0	0	0	0	0	0	0	0	0	0	0	1.55983	METHYLATION: Chen28689251
TM2D1	0	1.55983	0	0	0	0	0	0	0	0	0	0	0	0	0	0	0	0	0	0	0	0	0	0	0	0	0	0	0	0	0	0	0	0	0	0	1.55983	METHYLATION: Chen28689251
KANK4	0	1.55983	0	0	0	0	0	0	0	0	0	0	0	0	0	0	0	0	0	0	0	0	0	0	0	0	0	0	0	0	0	0	0	0	0	0	1.55983	METHYLATION: Chen28689251
EFCAB14	0	1.55983	0	0	0	0	0	0	0	0	0	0	0	0	0	0	0	0	0	0	0	0	0	0	0	0	0	0	0	0	0	0	0	0	0	0	1.55983	METHYLATION: Chen28689251
DLGAP3	0	1.55983	0	0	0	0	0	0	0	0	0	0	0	0	0	0	0	0	0	0	0	0	0	0	0	0	0	0	0	0	0	0	0	0	0	0	1.55983	METHYLATION: Chen28689251
EYA3	0	1.55983	0	0	0	0	0	0	0	0	0	0	0	0	0	0	0	0	0	0	0	0	0	0	0	0	0	0	0	0	0	0	0	0	0	0	1.55983	METHYLATION: Chen28689251
AHDC1	0	1.55983	0	0	0	0	0	0	0	0	0	0	0	0	0	0	0	0	0	0	0	0	0	0	0	0	0	0	0	0	0	0	0	0	0	0	1.55983	METHYLATION: Chen28689251
KIF1B	0	1.55983	0	0	0	0	0	0	0	0	0	0	0	0	0	0	0	0	0	0	0	0	0	0	0	0	0	0	0	0	0	0	0	0	0	0	1.55983	METHYLATION: Chen28689251
CAPN13	0	1.55983	0	0	0	0	0	0	0	0	0	0	0	0	0	0	0	0	0	0	0	0	0	0	0	0	0	0	0	0	0	0	0	0	0	0	1.55983	METHYLATION: Chen28689251
DUS4L	0	1.55983	0	0	0	0	0	0	0	0	0	0	0	0	0	0	0	0	0	0	0	0	0	0	0	0	0	0	0	0	0	0	0	0	0	0	1.55983	METHYLATION: Chen28689251
LRRN3	0	1.55983	0	0	0	0	0	0	0	0	0	0	0	0	0	0	0	0	0	0	0	0	0	0	0	0	0	0	0	0	0	0	0	0	0	0	1.55983	METHYLATION: Chen28689251
FAM71D	0	1.55983	0	0	0	0	0	0	0	0	0	0	0	0	0	0	0	0	0	0	0	0	0	0	0	0	0	0	0	0	0	0	0	0	0	0	1.55983	METHYLATION: Chen28689251
TAC3	0	1.55983	0	0	0	0	0	0	0	0	0	0	0	0	0	0	0	0	0	0	0	0	0	0	0	0	0	0	0	0	0	0	0	0	0	0	1.55983	METHYLATION: Chen28689251
CYRIB	0	1.55983	0	0	0	0	0	0	0	0	0	0	0	0	0	0	0	0	0	0	0	0	0	0	0	0	0	0	0	0	0	0	0	0	0	0	1.55983	METHYLATION: Chen28689251
EFR3A	0	1.55983	0	0	0	0	0	0	0	0	0	0	0	0	0	0	0	0	0	0	0	0	0	0	0	0	0	0	0	0	0	0	0	0	0	0	1.55983	METHYLATION: Chen28689251
KLHL31	0	1.55983	0	0	0	0	0	0	0	0	0	0	0	0	0	0	0	0	0	0	0	0	0	0	0	0	0	0	0	0	0	0	0	0	0	0	1.55983	METHYLATION: Chen28689251
FOXP3	0	1.55983	0	0	0	0	0	0	0	0	0	0	0	0	0	0	0	0	0	0	0	0	0	0	0	0	0	0	0	0	0	0	0	0	0	0	1.55983	METHYLATION: Chen28689251
PIR	0	1.55983	0	0	0	0	0	0	0	0	0	0	0	0	0	0	0	0	0	0	0	0	0	0	0	0	0	0	0	0	0	0	0	0	0	0	1.55983	METHYLATION: Chen28689251
CITED1	0	1.55983	0	0	0	0	0	0	0	0	0	0	0	0	0	0	0	0	0	0	0	0	0	0	0	0	0	0	0	0	0	0	0	0	0	0	1.55983	METHYLATION: Chen28689251
Gm732	0	1.55983	0	0	0	0	0	0	0	0	0	0	0	0	0	0	0	0	0	0	0	0	0	0	0	0	0	0	0	0	0	0	0	0	0	0	1.55983	METHYLATION: Chen28689251
6030498E09Rik	0	1.55983	0	0	0	0	0	0	0	0	0	0	0	0	0	0	0	0	0	0	0	0	0	0	0	0	0	0	0	0	0	0	0	0	0	0	1.55983	METHYLATION: Chen28689251
STAG2	0	1.55983	0	0	0	0	0	0	0	0	0	0	0	0	0	0	0	0	0	0	0	0	0	0	0	0	0	0	0	0	0	0	0	0	0	0	1.55983	METHYLATION: Chen28689251
ZDHHC9	0	1.55983	0	0	0	0	0	0	0	0	0	0	0	0	0	0	0	0	0	0	0	0	0	0	0	0	0	0	0	0	0	0	0	0	0	0	1.55983	METHYLATION: Chen28689251
BRS3	0	1.55983	0	0	0	0	0	0	0	0	0	0	0	0	0	0	0	0	0	0	0	0	0	0	0	0	0	0	0	0	0	0	0	0	0	0	1.55983	METHYLATION: Chen28689251
TBPL1	0	1.55983	0	0	0	0	0	0	0	0	0	0	0	0	0	0	0	0	0	0	0	0	0	0	0	0	0	0	0	0	0	0	0	0	0	0	1.55983	METHYLATION: Chen28689251
PAK1	0	1.55983	0	0	0	0	0	0	0	0	0	0	0	0	0	0	0	0	0	0	0	0	0	0	0	0	0	0	0	0	0	0	0	0	0	0	1.55983	METHYLATION: Chen28689251
DHX32	0	1.55983	0	0	0	0	0	0	0	0	0	0	0	0	0	0	0	0	0	0	0	0	0	0	0	0	0	0	0	0	0	0	0	0	0	0	1.55983	METHYLATION: Chen28689251
ABCA5	0	1.55983	0	0	0	0	0	0	0	0	0	0	0	0	0	0	0	0	0	0	0	0	0	0	0	0	0	0	0	0	0	0	0	0	0	0	1.55983	METHYLATION: Chen28689251
IQCG	0	1.55983	0	0	0	0	0	0	0	0	0	0	0	0	0	0	0	0	0	0	0	0	0	0	0	0	0	0	0	0	0	0	0	0	0	0	1.55983	METHYLATION: Chen28689251
ANKRD17	0	1.55983	0	0	0	0	0	0	0	0	0	0	0	0	0	0	0	0	0	0	0	0	0	0	0	0	0	0	0	0	0	0	0	0	0	0	1.55983	METHYLATION: Chen28689251
MTMR3	0	1.55983	0	0	0	0	0	0	0	0	0	0	0	0	0	0	0	0	0	0	0	0	0	0	0	0	0	0	0	0	0	0	0	0	0	0	1.55983	METHYLATION: Chen28689251
IMPA1	0	1.55983	0	0	0	0	0	0	0	0	0	0	0	0	0	0	0	0	0	0	0	0	0	0	0	0	0	0	0	0	0	0	0	0	0	0	1.55983	METHYLATION: Chen28689251
DNAJC5B	0	1.55983	0	0	0	0	0	0	0	0	0	0	0	0	0	0	0	0	0	0	0	0	0	0	0	0	0	0	0	0	0	0	0	0	0	0	1.55983	METHYLATION: Chen28689251
PKIB	0	1.55983	0	0	0	0	0	0	0	0	0	0	0	0	0	0	0	0	0	0	0	0	0	0	0	0	0	0	0	0	0	0	0	0	0	0	1.55983	METHYLATION: Chen28689251
MYT1L	0	1.55983	0	0	0	0	0	0	0	0	0	0	0	0	0	0	0	0	0	0	0	0	0	0	0	0	0	0	0	0	0	0	0	0	0	0	1.55983	METHYLATION: Chen28689251
SETD2	0	1.55983	0	0	0	0	0	0	0	0	0	0	0	0	0	0	0	0	0	0	0	0	0	0	0	0	0	0	0	0	0	0	0	0	0	0	1.55983	METHYLATION: Chen28689251
OPHN1	0	1.55983	0	0	0	0	0	0	0	0	0	0	0	0	0	0	0	0	0	0	0	0	0	0	0	0	0	0	0	0	0	0	0	0	0	0	1.55983	METHYLATION: Chen28689251
PANK3	0	1.55983	0	0	0	0	0	0	0	0	0	0	0	0	0	0	0	0	0	0	0	0	0	0	0	0	0	0	0	0	0	0	0	0	0	0	1.55983	METHYLATION: Chen28689251
CELF4	0	1.55983	0	0	0	0	0	0	0	0	0	0	0	0	0	0	0	0	0	0	0	0	0	0	0	0	0	0	0	0	0	0	0	0	0	0	1.55983	METHYLATION: Chen28689251
ZBED4	0	1.55983	0	0	0	0	0	0	0	0	0	0	0	0	0	0	0	0	0	0	0	0	0	0	0	0	0	0	0	0	0	0	0	0	0	0	1.55983	METHYLATION: Chen28689251
JAKMIP2	0	1.55983	0	0	0	0	0	0	0	0	0	0	0	0	0	0	0	0	0	0	0	0	0	0	0	0	0	0	0	0	0	0	0	0	0	0	1.55983	METHYLATION: Chen28689251
ANKIB1	0	1.55983	0	0	0	0	0	0	0	0	0	0	0	0	0	0	0	0	0	0	0	0	0	0	0	0	0	0	0	0	0	0	0	0	0	0	1.55983	METHYLATION: Chen28689251
NLGN3	0	1.55983	0	0	0	0	0	0	0	0	0	0	0	0	0	0	0	0	0	0	0	0	0	0	0	0	0	0	0	0	0	0	0	0	0	0	1.55983	METHYLATION: Chen28689251
Tsx	0	1.55983	0	0	0	0	0	0	0	0	0	0	0	0	0	0	0	0	0	0	0	0	0	0	0	0	0	0	0	0	0	0	0	0	0	0	1.55983	METHYLATION: Chen28689251
ASB12	0	1.55983	0	0	0	0	0	0	0	0	0	0	0	0	0	0	0	0	0	0	0	0	0	0	0	0	0	0	0	0	0	0	0	0	0	0	1.55983	METHYLATION: Chen28689251
SINHCAF	0	1.55983	0	0	0	0	0	0	0	0	0	0	0	0	0	0	0	0	0	0	0	0	0	0	0	0	0	0	0	0	0	0	0	0	0	0	1.55983	METHYLATION: Chen28689251
UTP14A	0	1.55983	0	0	0	0	0	0	0	0	0	0	0	0	0	0	0	0	0	0	0	0	0	0	0	0	0	0	0	0	0	0	0	0	0	0	1.55983	METHYLATION: Chen28689251
TMLHE	0	1.55983	0	0	0	0	0	0	0	0	0	0	0	0	0	0	0	0	0	0	0	0	0	0	0	0	0	0	0	0	0	0	0	0	0	0	1.55983	METHYLATION: Chen28689251
CCDC22	0	1.55983	0	0	0	0	0	0	0	0	0	0	0	0	0	0	0	0	0	0	0	0	0	0	0	0	0	0	0	0	0	0	0	0	0	0	1.55983	METHYLATION: Chen28689251
F8A1	0	1.55983	0	0	0	0	0	0	0	0	0	0	0	0	0	0	0	0	0	0	0	0	0	0	0	0	0	0	0	0	0	0	0	0	0	0	1.55983	METHYLATION: Chen28689251
ARMCX3	0	1.55983	0	0	0	0	0	0	0	0	0	0	0	0	0	0	0	0	0	0	0	0	0	0	0	0	0	0	0	0	0	0	0	0	0	0	1.55983	METHYLATION: Chen28689251
MSL3	0	1.55983	0	0	0	0	0	0	0	0	0	0	0	0	0	0	0	0	0	0	0	0	0	0	0	0	0	0	0	0	0	0	0	0	0	0	1.55983	METHYLATION: Chen28689251
TSHZ3	0	1.55983	0	0	0	0	0	0	0	0	0	0	0	0	0	0	0	0	0	0	0	0	0	0	0	0	0	0	0	0	0	0	0	0	0	0	1.55983	METHYLATION: Chen28689251
AKAP13	0	1.55983	0	0	0	0	0	0	0	0	0	0	0	0	0	0	0	0	0	0	0	0	0	0	0	0	0	0	0	0	0	0	0	0	0	0	1.55983	METHYLATION: Chen28689251
TEAD1	0	1.55983	0	0	0	0	0	0	0	0	0	0	0	0	0	0	0	0	0	0	0	0	0	0	0	0	0	0	0	0	0	0	0	0	0	0	1.55983	METHYLATION: Chen28689251
APBA1	0	1.55983	0	0	0	0	0	0	0	0	0	0	0	0	0	0	0	0	0	0	0	0	0	0	0	0	0	0	0	0	0	0	0	0	0	0	1.55983	METHYLATION: Chen28689251
RFX3	0	1.55983	0	0	0	0	0	0	0	0	0	0	0	0	0	0	0	0	0	0	0	0	0	0	0	0	0	0	0	0	0	0	0	0	0	0	1.55983	METHYLATION: Chen28689251
PLCE1	0	1.55983	0	0	0	0	0	0	0	0	0	0	0	0	0	0	0	0	0	0	0	0	0	0	0	0	0	0	0	0	0	0	0	0	0	0	1.55983	METHYLATION: Chen28689251
SPSB3	0	1.55983	0	0	0	0	0	0	0	0	0	0	0	0	0	0	0	0	0	0	0	0	0	0	0	0	0	0	0	0	0	0	0	0	0	0	1.55983	METHYLATION: Chen28689251
MAPK9	0	1.55983	0	0	0	0	0	0	0	0	0	0	0	0	0	0	0	0	0	0	0	0	0	0	0	0	0	0	0	0	0	0	0	0	0	0	1.55983	METHYLATION: Chen28689251
RPH3AL	0	1.55983	0	0	0	0	0	0	0	0	0	0	0	0	0	0	0	0	0	0	0	0	0	0	0	0	0	0	0	0	0	0	0	0	0	0	1.55983	METHYLATION: Chen28689251
RAB5C	0	1.55983	0	0	0	0	0	0	0	0	0	0	0	0	0	0	0	0	0	0	0	0	0	0	0	0	0	0	0	0	0	0	0	0	0	0	1.55983	METHYLATION: Chen28689251
Sectm1b	0	1.55983	0	0	0	0	0	0	0	0	0	0	0	0	0	0	0	0	0	0	0	0	0	0	0	0	0	0	0	0	0	0	0	0	0	0	1.55983	METHYLATION: Chen28689251
KCNJ6	0	1.55983	0	0	0	0	0	0	0	0	0	0	0	0	0	0	0	0	0	0	0	0	0	0	0	0	0	0	0	0	0	0	0	0	0	0	1.55983	METHYLATION: Chen28689251
B3GALT5	0	1.55983	0	0	0	0	0	0	0	0	0	0	0	0	0	0	0	0	0	0	0	0	0	0	0	0	0	0	0	0	0	0	0	0	0	0	1.55983	METHYLATION: Chen28689251
LPP	0	1.55983	0	0	0	0	0	0	0	0	0	0	0	0	0	0	0	0	0	0	0	0	0	0	0	0	0	0	0	0	0	0	0	0	0	0	1.55983	METHYLATION: Chen28689251
ARVCF	0	1.55983	0	0	0	0	0	0	0	0	0	0	0	0	0	0	0	0	0	0	0	0	0	0	0	0	0	0	0	0	0	0	0	0	0	0	1.55983	METHYLATION: Chen28689251
FKBP6	0	1.55983	0	0	0	0	0	0	0	0	0	0	0	0	0	0	0	0	0	0	0	0	0	0	0	0	0	0	0	0	0	0	0	0	0	0	1.55983	METHYLATION: Chen28689251
RIMBP2	0	1.55983	0	0	0	0	0	0	0	0	0	0	0	0	0	0	0	0	0	0	0	0	0	0	0	0	0	0	0	0	0	0	0	0	0	0	1.55983	METHYLATION: Chen28689251
FAM222A	0	1.55983	0	0	0	0	0	0	0	0	0	0	0	0	0	0	0	0	0	0	0	0	0	0	0	0	0	0	0	0	0	0	0	0	0	0	1.55983	METHYLATION: Chen28689251
AMBN	0	1.55983	0	0	0	0	0	0	0	0	0	0	0	0	0	0	0	0	0	0	0	0	0	0	0	0	0	0	0	0	0	0	0	0	0	0	1.55983	METHYLATION: Chen28689251
KCNIP4	0	1.55983	0	0	0	0	0	0	0	0	0	0	0	0	0	0	0	0	0	0	0	0	0	0	0	0	0	0	0	0	0	0	0	0	0	0	1.55983	METHYLATION: Chen28689251
FIGNL1	0	1.55983	0	0	0	0	0	0	0	0	0	0	0	0	0	0	0	0	0	0	0	0	0	0	0	0	0	0	0	0	0	0	0	0	0	0	1.55983	METHYLATION: Chen28689251
PUS10	0	1.55983	0	0	0	0	0	0	0	0	0	0	0	0	0	0	0	0	0	0	0	0	0	0	0	0	0	0	0	0	0	0	0	0	0	0	1.55983	METHYLATION: Chen28689251
THRB	0	1.55983	0	0	0	0	0	0	0	0	0	0	0	0	0	0	0	0	0	0	0	0	0	0	0	0	0	0	0	0	0	0	0	0	0	0	1.55983	METHYLATION: Chen28689251
FAM3D	0	1.55983	0	0	0	0	0	0	0	0	0	0	0	0	0	0	0	0	0	0	0	0	0	0	0	0	0	0	0	0	0	0	0	0	0	0	1.55983	METHYLATION: Chen28689251
FDFT1	0	1.55983	0	0	0	0	0	0	0	0	0	0	0	0	0	0	0	0	0	0	0	0	0	0	0	0	0	0	0	0	0	0	0	0	0	0	1.55983	METHYLATION: Chen28689251
KLF12	0	1.55983	0	0	0	0	0	0	0	0	0	0	0	0	0	0	0	0	0	0	0	0	0	0	0	0	0	0	0	0	0	0	0	0	0	0	1.55983	METHYLATION: Chen28689251
BTD	0	1.55983	0	0	0	0	0	0	0	0	0	0	0	0	0	0	0	0	0	0	0	0	0	0	0	0	0	0	0	0	0	0	0	0	0	0	1.55983	METHYLATION: Chen28689251
FCHO1	0	1.55983	0	0	0	0	0	0	0	0	0	0	0	0	0	0	0	0	0	0	0	0	0	0	0	0	0	0	0	0	0	0	0	0	0	0	1.55983	METHYLATION: Chen28689251
ABHD13	0	1.55983	0	0	0	0	0	0	0	0	0	0	0	0	0	0	0	0	0	0	0	0	0	0	0	0	0	0	0	0	0	0	0	0	0	0	1.55983	METHYLATION: Chen28689251
[truncated: 5,637 more rows]
