# Supplementary material for: Systems-Level Insights into Bronchopulmonary Dysplasia from Meta-Analysis of Genome- Scale Studies
Source: Research Square preprint supplement (doi:10.21203/rs.3.rs-8552464/v1), 2026-01-21
Supplement: Supplementary file 4 [file ecc6e65eadad0ead5dde0adf.xlsx]

## Sheet: rodent_gsea_go
ONTOLOGY	ID	Description	setSize	enrichmentScore	NES	pvalue	p.adjust	qvalue	rank	leading_edge	core_enrichment
MF	GO:1903231	mRNA base-pairing translational repressor activity	49	-0.997952	-8.77486	1e-10	2.82095e-08	2.12481e-08	65	tags=100%	list=1%	signal=100%	574411/554213/100126333/574030/406952/406933/407035/406919/407004/406940/406938/574450/407018/442900/406892/693121/406936/619556/406927/406990/406942/494337/406959/407014/442909/406996/494335/574501/407006/406983/406987/406966/407007/406895/664613/442901/574457/574441/442893/406946/406932/406954/406931/406914/407015/574031/574448/407042
CC	GO:0016442	RISC complex	57	-0.791978	-7.72497	1e-10	2.82095e-08	2.12481e-08	65	tags=86%	list=1%	signal=86%	407034/407011/574030/406952/406933/407035/406919/407004/406940/406938/407018/442900/406892/693121/406936/619556/406927/406942/494337/406959/407014/406906/442909/406996/494335/574501/407006/406983/406987/406966/407007/406895/494326/664617/664613/442901/574441/406946/406932/574034/406954/100126319/100126308/406931/406914/100302149/406960/407015/574448
CC	GO:0031332	RNAi effector complex	57	-0.791978	-7.72497	1e-10	2.82095e-08	2.12481e-08	65	tags=86%	list=1%	signal=86%	407034/407011/574030/406952/406933/407035/406919/407004/406940/406938/407018/442900/406892/693121/406936/619556/406927/406942/494337/406959/407014/406906/442909/406996/494335/574501/407006/406983/406987/406966/407007/406895/494326/664617/664613/442901/574441/406946/406932/574034/406954/100126319/100126308/406931/406914/100302149/406960/407015/574448
BP	GO:0035195	miRNA-mediated post-transcriptional gene silencing	84	-0.621126	-7.63601	1e-10	2.82095e-08	2.12481e-08	65	tags=71%	list=1%	signal=72%	407034/407011/574411/554213/100126333/574030/406952/406933/407035/406919/407004/406940/406938/574450/407018/442900/406892/574433/693121/406936/619556/406927/406990/406942/494337/406959/407014/406906/442909/406996/494335/574501/407006/406983/406987/406966/693124/407007/406895/494326/664617/664613/442901/574457/574441/442893/406946/406932/574034/406954/100126319/100126308/406931/406914/100302149/40…
BP	GO:0035194	regulatory ncRNA-mediated post-transcriptional gene silencing	91	-0.576763	-7.60179	1e-10	2.82095e-08	2.12481e-08	65	tags=66%	list=1%	signal=66%	407034/407011/574411/554213/100126333/574030/406952/406933/407035/406919/407004/406940/406938/574450/407018/442900/406892/574433/693121/406936/619556/406927/406990/406942/494337/406959/407014/406906/442909/406996/494335/574501/407006/406983/406987/406966/693124/407007/406895/494326/664617/664613/442901/574457/574441/442893/406946/406932/574034/406954/100126319/100126308/406931/406914/100302149/40…
MF	GO:0030371	translation repressor activity	66	-0.721278	-7.35404	1e-10	2.82095e-08	2.12481e-08	275	tags=79%	list=4%	signal=77%	5914/64506/22849/407034/574411/554213/100126333/574030/406952/406933/407035/406919/407004/406940/406938/574450/407018/442900/406892/693121/406936/619556/406927/406990/406942/494337/406959/407014/442909/406996/494335/574501/407006/406983/406987/406966/407007/406895/664613/442901/574457/574441/442893/406946/406932/406954/406931/406914/407015/574031/574448/407042
BP	GO:0016441	post-transcriptional gene silencing	92	-0.565602	-7.11732	1e-10	2.82095e-08	2.12481e-08	65	tags=65%	list=1%	signal=65%	407034/407011/574411/554213/100126333/574030/406952/406933/407035/406919/407004/406940/406938/574450/407018/442900/406892/574433/693121/406936/619556/406927/406990/406942/494337/406959/407014/406906/442909/406996/494335/574501/407006/406983/406987/406966/693124/407007/406895/494326/664617/664613/442901/574457/574441/442893/406946/406932/574034/406954/100126319/100126308/406931/406914/100302149/40…
MF	GO:0045182	translation regulator activity	80	-0.59659	-7.0523	1e-10	2.82095e-08	2.12481e-08	275	tags=68%	list=4%	signal=66%	5914/64506/9811/57409/22849/407034/574411/554213/100126333/574030/406952/406933/407035/406919/407004/406940/406938/574450/407018/442900/406892/693121/406936/619556/406927/406990/406942/494337/406959/407014/442909/406996/494335/574501/407006/406983/406987/406966/407007/406895/664613/442901/574457/574441/442893/406946/406932/406954/406931/406914/407015/574031/574448/407042
BP	GO:0035279	miRNA-mediated gene silencing by mRNA destabilization	16	-0.994019	-4.92275	1e-10	2.82095e-08	2.12481e-08	61	tags=100%	list=1%	signal=99%	406919/406938/407018/442900/406892/442909/406996/494335/406987/406966/664613/574457/442893/406932/406954
CC	GO:0062023	collagen-containing extracellular matrix	284	0.393956	2.39222	1e-10	2.82095e-08	2.12481e-08	1384	tags=39%	list=19%	signal=33%	3958/1490/6590/4318/4313/23452/23213/309/12/11096/713/8483/1215/6281/7076/1281/6280/712/4317/6279/1404/9518/7448/4237/2335/3697/158326/5858/5270/1000/2239/1295/4015/10218/1297/1286/8404/5315/2719/25975/3956/1277/1278/4192/3371/10516/1508/7472/30008/301/1191/1634/4017/2192/1284/1282/2006/1509/151887/2202/8406/10631/5118/1893/1512/1476/83872/8685/4053/133584/2817/26585/7052/183/81794/3320/6383/871/…
CC	GO:0030312	external encapsulating structure	353	0.383189	2.35951	1e-10	2.82095e-08	2.12481e-08	1746	tags=43%	list=24%	signal=35%	3958/1490/4323/1116/6590/4318/4313/23452/23213/309/12/11096/713/8483/4321/1215/6281/7076/1281/6280/712/4317/6279/1404/9518/7448/4237/2335/3697/158326/5858/5270/1000/2239/249/1295/162466/4015/10218/1297/7481/1286/8404/5315/2719/25975/3956/1277/1278/4192/3371/10516/1508/7472/30008/301/1191/1634/4017/2192/1284/1282/2006/1509/151887/2202/8406/10631/5118/1893/1512/1476/10417/83872/8685/4053/133584/571…
CC	GO:0031012	extracellular matrix	353	0.383189	2.35951	1e-10	2.82095e-08	2.12481e-08	1746	tags=43%	list=24%	signal=35%	3958/1490/4323/1116/6590/4318/4313/23452/23213/309/12/11096/713/8483/4321/1215/6281/7076/1281/6280/712/4317/6279/1404/9518/7448/4237/2335/3697/158326/5858/5270/1000/2239/249/1295/162466/4015/10218/1297/7481/1286/8404/5315/2719/25975/3956/1277/1278/4192/3371/10516/1508/7472/30008/301/1191/1634/4017/2192/1284/1282/2006/1509/151887/2202/8406/10631/5118/1893/1512/1476/10417/83872/8685/4053/133584/571…
BP	GO:0006954	inflammatory response	472	0.363857	2.2649	1e-10	2.82095e-08	2.12481e-08	2227	tags=50%	list=30%	signal=37%	3579/7850/5743/50507/3479/718/1116/5788/4318/27159/8993/6850/7941/6774/8807/10125/841/27250/90139/225/9759/12/3312/2099/720/6352/1215/7076/5603/2950/1435/6347/719/6280/3684/712/4317/6279/6354/11006/2357/929/2213/414062/5169/54209/246/3627/10164/2335/3001/10225/80274/185/7852/3148/5547/2778/4067/27202/2534/56603/284340/9215/747/84868/4780/3956/4192/3371/2876/1241/2358/960/6608/5580/301/1191/5740/1…
CC	GO:0009986	cell surface	486	0.363383	2.26317	1e-10	2.82095e-08	2.12481e-08	1732	tags=41%	list=23%	signal=34%	3579/7850/3958/477/914/7018/6402/1441/718/5788/4897/931/1368/84824/8807/963/10149/23213/8832/84189/81619/11122/135228/57758/6281/3309/3326/3684/285852/2015/11006/2813/482/929/338339/2213/5169/3627/221395/9353/4756/10791/3821/80274/643/93974/55576/100133941/7852/89886/55959/4036/1000/2239/7035/80031/2690/1902/2936/283316/387837/8581/84868/2719/5795/115019/960/1508/2028/1410/5329/301/1191/4628/6091…
BP	GO:0048514	blood vessel morphogenesis	438	0.353829	2.19744	1e-10	2.82095e-08	2.12481e-08	2424	tags=53%	list=33%	signal=38%	3579/581/5743/3248/1490/718/187/4323/1116/51176/10365/6850/4897/4313/6774/841/23213/90139/54453/55810/10457/1215/6271/5230/6347/1281/5579/719/71/8828/3627/2185/221395/2335/9353/93974/55576/185/7852/5547/28984/5906/3202/4036/1000/2534/1295/4015/11005/284340/51330/7481/5315/4780/694/5795/5371/4192/2034/2876/116844/6608/30008/2028/301/8463/2277/1634/4017/7498/6091/10052/8817/1284/23414/1386/1282/578…
BP	GO:0001568	blood vessel development	491	0.349174	2.17468	1e-10	2.82095e-08	2.12481e-08	2424	tags=52%	list=33%	signal=38%	3579/581/5743/3248/1490/718/187/4323/1116/51176/10365/6850/4897/4313/6774/841/23213/90139/54453/55810/10457/1215/6271/5230/6347/1281/5579/719/71/8828/3627/2185/221395/2335/9353/93974/55576/185/7852/5547/28984/5906/3202/4036/1000/2534/1295/4015/11005/284340/9215/51330/8837/7481/5315/2719/4780/694/1277/1278/5795/5371/4192/2034/2876/116844/6608/7472/30008/2028/301/8463/2277/1634/4017/7498/6091/10052…
BP	GO:0002252	immune effector process	343	0.352468	2.16546	1e-10	2.82095e-08	2.12481e-08	2220	tags=50%	list=30%	signal=37%	5880/3958/914/5052/718/5788/51176/8993/6850/6774/8807/10125/8832/29851/720/713/6280/3684/712/11006/338339/2213/729/9214/969/51237/924/57126/11151/5169/54209/6775/2185/3821/10225/28984/4067/2534/80031/11005/387837/84868/3075/3956/4192/5580/301/1191/7189/966/653509/9452/3936/1636/1051/1512/4282/7305/10417/975/9261/1604/8773/3553/3055/2208/11221/940/6556/3329/56892/9865/81622/2207/730/7474/7043/2624…
BP	GO:0050865	regulation of cell activation	348	0.35108	2.15969	1e-10	2.82095e-08	2.12481e-08	1686	tags=39%	list=23%	signal=32%	5880/3958/3479/914/4323/5788/51176/5341/8993/6850/55024/10125/8832/29851/10457/6352/6441/6347/1026/4317/11006/338339/2213/969/51237/11151/5169/54209/221395/2335/3821/4332/6664/100133941/5270/4067/7704/2534/11005/56603/84868/3956/5795/4192/5580/301/7189/4254/1051/4282/7305/5156/5588/975/2729/8654/9572/5321/1604/1947/10461/3553/11221/1803/940/140885/9580/3329/7356/861/2316/2207/961/7056/7474/6659/6…
BP	GO:0009617	response to bacterium	370	0.340368	2.10031	1e-10	2.82095e-08	2.12481e-08	2301	tags=49%	list=31%	signal=36%	5743/3248/1571/3934/7018/718/6590/4318/8993/6850/931/51316/55024/841/27250/84419/57048/225/11096/27063/7431/6441/6648/2950/2706/6347/6280/3684/4317/6279/929/338339/2213/54209/3627/2920/3001/10225/55576/100133941/3148/3158/4067/3032/249/11005/84868/55593/2719/2876/2358/2326/116844/5580/2277/7189/151887/1636/7538/1051/4282/10417/6332/83872/9572/9261/6364/1604/650/5599/3553/3055/4360/11221/6556/1408…
CC	GO:0098552	side of membrane	369	0.338816	2.09015	1e-10	2.82095e-08	2.12481e-08	1732	tags=40%	list=23%	signal=32%	3579/914/6402/1441/5788/4897/931/1368/84824/8832/130576/3312/4978/135228/161357/3684/2015/11006/2813/482/929/338339/2213/57126/5169/246/419/3627/3821/80274/643/55576/100133941/7852/89886/360226/2778/4067/4036/2239/55970/7035/249/2690/821/2936/1272/283316/3301/387837/622/8581/9885/2719/100820829/1508/2028/5329/7189/966/8516/1636/5778/2022/9244/5156/57124/2817/1604/92154/57007/5997/3055/2208/5314/9…
BP	GO:0030155	regulation of cell adhesion	452	0.321301	1.99669	1e-10	2.82095e-08	2.12481e-08	2216	tags=46%	list=30%	signal=34%	5880/3958/3479/4323/5788/51176/6850/4313/10125/9448/8631/54453/29851/10457/6352/4321/6281/6441/1435/6347/11006/7448/10562/71/969/9595/11151/246/2185/10164/2335/100133941/7852/28984/5270/4067/7704/2534/8874/1295/11005/51201/84868/25975/3956/1277/5795/5371/4192/3371/960/30008/5329/5580/301/6591/2192/340485/7189/23499/151887/4254/2022/10631/1051/6789/5588/9435/57556/975/133584/8654/84466/1604/3557/6…
CC	GO:0022625	cytosolic large ribosomal subunit	49	0.590367	2.90504	1.46997e-10	3.95823e-08	2.98144e-08	2919	tags=98%	list=40%	signal=60%	6138/7311/6164/6134/285855/6171/6160/4736/6122/6152/6159/6173/6146/9349/6135/6132/6137/6166/9045/6155/6154/11224/6141/6158/6128/6133/6161/6175/6144/6129/6139/25873/6130/6181/6143/6165/6167/6142/6156/6168/6169/6124/6157/6170/6125/23521/6136/6176
CC	GO:0022626	cytosolic ribosome	87	0.491204	2.66035	1.78939e-10	4.60884e-08	3.47149e-08	2919	tags=86%	list=40%	signal=53%	6138/7311/51065/64320/6164/6217/3921/6134/2935/285855/6171/6160/6201/4736/6122/6152/6159/6210/6173/6146/9349/6223/6135/6132/6137/6166/9045/6155/6193/6154/11224/6205/6141/6158/6128/6133/6231/6161/6175/6144/6129/6202/6139/25873/6187/6130/6188/1915/6224/6181/6229/6143/6165/6203/6192/6167/6142/6156/6168/6169/6124/6228/6227/2197/6232/6235/6157/6206/6170/6125/6208/23521/6136/6218/6176
BP	GO:0001525	angiogenesis	389	0.332006	2.05338	3.32769e-10	8.21384e-08	6.18687e-08	2424	tags=51%	list=33%	signal=36%	3579/5743/1490/718/187/4323/1116/51176/10365/6850/4897/4313/6774/841/23213/90139/55810/10457/1215/6271/5230/6347/5579/719/71/8828/3627/2185/2335/9353/93974/55576/185/7852/5547/28984/3202/2534/1295/11005/284340/51330/5315/4780/694/5795/5371/4192/2034/2876/116844/2028/301/2277/1634/4017/6091/8817/1284/1386/1282/5787/5740/64321/1636/2022/1893/1512/6789/7127/5156/57556/6772/6672/79805/55109/2296/5700…
BP	GO:0046649	lymphocyte activation	433	0.317755	1.97194	5.26354e-10	1.24725e-07	9.39459e-08	1689	tags=36%	list=23%	signal=30%	5880/581/3958/3479/914/5052/718/4323/5788/51176/8993/6850/6774/931/55024/10125/841/8832/29851/9759/10457/6352/6441/6347/1026/5579/11006/338339/2213/969/51237/924/11151/54209/6775/2185/3821/4332/643/6664/100133941/89886/4067/7704/2534/80031/11005/56603/8581/84868/3956/5795/4192/960/2934/5580/301/1386/7189/9452/3936/4254/1051/4282/7305/5588/975/8654/1604/1947/10461/3553/4783/11221/1803/940/6556/140…
BP	GO:0050900	leukocyte migration	232	0.373952	2.24609	6.37164e-10	1.45175e-07	1.0935e-07	1653	tags=41%	list=22%	signal=32%	5880/3579/3958/6402/1441/4323/6850/7941/4313/9023/6352/6441/1435/6347/719/6280/6279/6354/9518/2813/969/57126/11151/151647/54209/3627/2185/10164/9353/643/7852/4067/5048/27202/2534/284340/5795/4192/2358/301/2277/100532736/4254/1893/4282/9435/975/50512/10894/6364/26585/3553/3055/1803/140885/3162/4627/3676/2207/811/1800/961/23236/7422/7474/6558/7412/3554/3552/11117/134/2625/8792/8995/57580/7057/1901/…
BP	GO:0045807	positive regulation of endocytosis	78	0.501276	2.6695	6.78533e-10	1.48875e-07	1.12137e-07	1827	tags=59%	list=25%	signal=45%	7018/718/187/5788/6850/55646/720/6441/6347/7448/929/2213/54209/636/2719/5795/2358/1191/4908/26585/10461/6556/140885/2207/811/961/7422/7474/2624/558/25999/348/1535/64581/2212/6401/3071/26228/2209/567/57817/5054/8862/197/5873/9779
BP	GO:0001819	positive regulation of cytokine production	276	0.353145	2.14162	1.10563e-09	2.25854e-07	1.70119e-07	2240	tags=50%	list=30%	signal=36%	5743/914/2597/718/1116/5788/27159/6850/6774/841/23213/338382/26137/10621/4321/5603/719/4317/929/2213/924/54209/3148/28984/55959/3303/284340/84868/7481/5795/4192/6675/301/1191/10010/1386/7189/10631/1051/4282/7305/10417/5588/975/6772/9261/1604/3553/55612/183/940/6556/3320/3162/3329/861/81622/57493/2207/1660/23236/7474/3459/3554/3552/9641/8808/64170/2625/3357/10564/7057/1958/8809/947/1535/64581/5714…
BP	GO:0030335	positive regulation of cell migration	355	0.332509	2.0495	1.07382e-09	2.25854e-07	1.70119e-07	2406	tags=50%	list=33%	signal=36%	5880/3579/5743/3958/3479/4323/5788/4318/51176/7941/4313/6774/841/9448/54453/3312/10457/6352/6648/1435/6347/3309/719/6354/7448/71/8828/11151/414062/54209/3627/2185/2335/7852/4067/80031/8874/1902/284340/54910/4780/1277/5795/4192/2358/6608/301/6591/2277/5168/2192/4908/8817/4254/3488/10631/223117/1512/6789/5156/57556/10894/6364/650/57007/3553/8840/55612/183/3162/3676/2316/811/961/7422/7474/5962/55749…
BP	GO:0001816	cytokine production	440	0.31333	1.94603	1.31244e-09	2.59163e-07	1.95208e-07	2357	tags=47%	list=32%	signal=34%	7850/5743/3479/914/2597/718/1116/5788/51176/27159/8993/10365/6850/6774/55024/841/23213/27250/338382/8832/26137/225/10621/10457/4321/1215/6441/5603/2950/1281/719/4317/11006/929/2213/924/54209/2335/10225/100133941/3148/28984/55959/4067/490/27202/3303/284340/84868/55593/7481/5795/5371/4192/6675/301/1191/6591/2192/10010/1386/7189/10631/7538/1051/4282/7305/10417/5588/975/6772/9261/1604/10461/3553/8840…
BP	GO:0002274	myeloid leukocyte activation	135	0.427697	2.4477	1.43094e-09	2.67913e-07	2.01799e-07	2264	tags=59%	list=31%	signal=42%	5880/3579/914/5788/6850/8807/10125/8832/6352/1435/3684/712/4317/11006/338339/2213/57126/5169/54209/221395/2335/55509/4067/84868/5580/301/1191/7189/4282/7305/4137/9572/5321/8773/2208/6556/3329/2207/3694/7474/2624/3459/1050/10062/57580/7057/3929/6688/81501/116449/26228/5320/3815/57817/6372/6338/199/728/820/729230/1437/2242/2268/2896/3600/3606/90865/3566/3689/4853/5294/5724/5777/6813/7097/7098/7124/…
BP	GO:0050867	positive regulation of cell activation	205	0.382686	2.27362	1.53515e-09	2.67913e-07	2.01799e-07	2236	tags=53%	list=30%	signal=38%	3479/914/4323/5788/51176/5341/6850/10125/29851/6352/6347/1026/4317/11006/338339/11151/54209/100133941/4067/7704/2534/84868/3956/5795/4192/301/7189/4254/4282/7305/5588/975/5321/1604/1947/3553/11221/1803/940/140885/9580/3329/861/2316/961/7474/6659/6605/7412/4208/558/3552/1050/3635/8808/3485/2625/3707/3142/4921/8440/7057/59/64581/3929/5896/6688/596/26258/6403/6666/100/916/3071/22914/6693/920/30009/3…
BP	GO:0045229	external encapsulating structure organization	207	0.377027	2.24173	1.55106e-09	2.67913e-07	2.01799e-07	1411	tags=39%	list=19%	signal=32%	4323/4318/4313/23213/11096/4321/1215/1281/4317/7448/2295/28984/55959/1295/4015/11005/9215/10218/1297/8837/1286/25975/1277/1278/10516/30008/4017/2192/1284/1282/2006/3936/151887/8516/2022/10631/5156/83872/133584/650/2296/26585/55612/1803/183/81794/871/4239/85301/861/170691/10266/60681/7045/1515/283208/4016/51144/649/1805/9510/285590/7490/79709/84168/11117/11093/5768/2331/6692/9719/4921/1999/6939/13…
MF	GO:0038023	signaling receptor activity	486	0.308397	1.92072	1.58288e-09	2.67913e-07	2.01799e-07	2446	tags=49%	list=33%	signal=35%	3579/7850/5157/3248/914/1441/187/5788/8993/5284/6774/84824/8807/2982/10149/387509/147/11122/29851/2099/11318/53637/719/285852/2015/11006/2357/929/338339/8828/2213/9214/969/924/54209/221395/4756/8477/3821/643/185/7852/55504/1131/27202/2239/2690/1902/9934/2831/1241/2358/960/6608/5329/2104/6091/5745/5787/2202/2022/1512/9244/5156/6332/8685/57211/9572/9970/10894/4929/57007/3482/10461/2208/4360/5314/94…
MF	GO:0060089	molecular transducer activity	486	0.308397	1.92072	1.58288e-09	2.67913e-07	2.01799e-07	2446	tags=49%	list=33%	signal=35%	3579/7850/5157/3248/914/1441/187/5788/8993/5284/6774/84824/8807/2982/10149/387509/147/11122/29851/2099/11318/53637/719/285852/2015/11006/2357/929/338339/8828/2213/9214/969/924/54209/221395/4756/8477/3821/643/185/7852/55504/1131/27202/2239/2690/1902/9934/2831/1241/2358/960/6608/5329/2104/6091/5745/5787/2202/2022/1512/9244/5156/6332/8685/57211/9572/9970/10894/4929/57007/3482/10461/2208/4360/5314/94…
BP	GO:0001906	cell killing	112	0.449862	2.50678	1.69387e-09	2.78735e-07	2.0995e-07	2227	tags=62%	list=30%	signal=44%	3958/914/2597/5052/718/5788/8993/8807/10125/3684/2213/729/11151/3627/2920/3001/3821/387837/84868/3075/966/1512/7305/6364/1604/5599/9547/4069/730/10383/3251/3635/6688/2212/733/6361/6367/4818/5551/3071/22914/3004/3824/3823/26228/4068/2209/5320/6957/567/57817/3593/135250/10870/912/6372/2885/5873/51571/9390/6338/383/820/634/3606/146850/5777/6813/6357
BP	GO:0045087	innate immune response	474	0.306634	1.90944	1.9664e-09	3.14836e-07	2.37142e-07	2226	tags=44%	list=30%	signal=33%	3934/3958/914/2597/5052/718/6590/8993/6850/8807/10125/841/338382/8832/55646/9759/10621/3312/9023/2099/720/6352/713/4321/7431/481/6441/1435/6347/6280/3684/712/6279/285852/2813/929/338339/71/2213/729/57126/11151/8519/54209/92747/3627/3821/10225/4332/3148/4067/1374/2534/9470/3303/387837/8577/10435/84868/3075/57590/5063/4780/5371/2358/2934/6675/301/1191/10868/10010/7189/4282/7305/10417/8685/6772/9572…
BP	GO:0030198	extracellular matrix organization	206	0.378935	2.25115	2.19021e-09	3.2437e-07	2.44324e-07	1411	tags=39%	list=19%	signal=32%	4323/4318/4313/23213/11096/4321/1215/1281/4317/7448/2295/28984/55959/1295/4015/11005/9215/10218/1297/8837/1286/25975/1277/1278/10516/30008/4017/2192/1284/1282/2006/3936/151887/8516/2022/10631/5156/83872/133584/650/2296/26585/55612/1803/183/81794/871/4239/85301/861/170691/10266/60681/7045/1515/283208/4016/51144/649/1805/9510/285590/7490/79709/84168/11117/11093/5768/2331/6692/9719/4921/1999/6939/13…
BP	GO:0043062	extracellular structure organization	206	0.378935	2.25115	2.19021e-09	3.2437e-07	2.44324e-07	1411	tags=39%	list=19%	signal=32%	4323/4318/4313/23213/11096/4321/1215/1281/4317/7448/2295/28984/55959/1295/4015/11005/9215/10218/1297/8837/1286/25975/1277/1278/10516/30008/4017/2192/1284/1282/2006/3936/151887/8516/2022/10631/5156/83872/133584/650/2296/26585/55612/1803/183/81794/871/4239/85301/861/170691/10266/60681/7045/1515/283208/4016/51144/649/1805/9510/285590/7490/79709/84168/11117/11093/5768/2331/6692/9719/4921/1999/6939/13…
BP	GO:0002694	regulation of leukocyte activation	313	0.342284	2.08841	2.09429e-09	3.2437e-07	2.44324e-07	1686	tags=39%	list=23%	signal=31%	5880/3958/3479/914/4323/5788/51176/8993/6850/55024/10125/8832/29851/10457/6352/6441/6347/1026/4317/11006/338339/2213/969/51237/11151/5169/54209/221395/2335/3821/4332/6664/100133941/4067/7704/2534/11005/56603/84868/3956/4192/301/7189/4254/1051/4282/7305/5588/975/8654/9572/5321/1604/1947/10461/3553/11221/1803/940/140885/9580/3329/7356/861/961/7474/6659/6605/7412/55824/677/4208/558/6932/3398/3552/10…
BP	GO:0022603	regulation of anatomical structure morphogenesis	471	0.30871	1.92078	2.60586e-09	3.76515e-07	2.83601e-07	2406	tags=48%	list=33%	signal=35%	5880/3579/718/187/1116/10365/121512/6774/23213/90139/57689/55810/10457/2099/1215/6271/5230/1435/6347/5579/719/6354/56990/11151/55843/3627/2185/2335/9353/53335/7852/28984/3202/547/9500/5048/2245/2534/80031/8874/1902/283149/11005/10435/1002/4133/5315/221061/5063/4780/694/5371/4192/960/116844/6608/7472/301/6591/1634/4628/5168/6091/8817/1284/1386/51177/627/30812/23499/5740/2717/2022/157285/1893/1512/…
BP	GO:0002443	leukocyte mediated immunity	210	0.372362	2.2168	2.99253e-09	4.11111e-07	3.09659e-07	2216	tags=53%	list=30%	signal=38%	5880/914/5052/718/5788/6850/8807/10125/8832/720/713/3684/712/11006/2213/729/9214/924/57126/11151/54209/3821/10225/4067/387837/84868/5580/1191/7189/1636/1512/7305/10417/975/1604/8773/3553/2208/940/3329/81622/2207/730/2624/3554/10383/3251/3635/64170/2625/80762/8809/64581/6688/2212/10865/9156/733/4818/5551/3071/22914/6693/925/3004/7454/116449/3824/30009/716/3823/26228/4068/2209/939/6957/567/3815/359…
BP	GO:0006935	chemotaxis	260	0.353401	2.13391	3.05349e-09	4.11111e-07	3.09659e-07	2487	tags=55%	list=34%	signal=38%	5880/3579/3958/1441/4046/51176/6850/7941/4313/123920/10457/9023/6352/6441/1435/6347/719/6280/6279/6354/2357/8828/11151/414062/151647/54209/3627/2185/9353/2920/643/185/7852/3148/4067/27202/1902/4015/284340/54910/5795/4192/2358/5329/5580/301/2277/5168/6091/4908/8817/100532736/2022/223117/4282/5156/5588/6364/5288/57007/26585/3553/1803/9547/2207/811/1800/7422/7474/6558/7412/59352/8792/8995/57580/7057…
BP	GO:0042330	taxis	260	0.353401	2.13391	3.05349e-09	4.11111e-07	3.09659e-07	2487	tags=55%	list=34%	signal=38%	5880/3579/3958/1441/4046/51176/6850/7941/4313/123920/10457/9023/6352/6441/1435/6347/719/6280/6279/6354/2357/8828/11151/414062/151647/54209/3627/2185/9353/2920/643/185/7852/3148/4067/27202/1902/4015/284340/54910/5795/4192/2358/5329/5580/301/2277/5168/6091/4908/8817/100532736/2022/223117/4282/5156/5588/6364/5288/57007/26585/3553/1803/9547/2207/811/1800/7422/7474/6558/7412/59352/8792/8995/57580/7057…
BP	GO:0040017	positive regulation of locomotion	374	0.323933	1.99924	3.82369e-09	5.03367e-07	3.79149e-07	2447	tags=50%	list=33%	signal=35%	5880/3579/5743/3958/3479/7018/4323/5788/4318/51176/7941/4313/6774/841/9448/54453/3312/10457/6352/6648/1435/6347/3309/719/6354/7448/71/8828/11151/414062/54209/3627/2185/2335/9353/7852/4067/80031/8874/1902/284340/54910/4780/1277/5795/4192/2358/6608/301/6591/2277/5168/2192/4908/8817/4254/3488/10631/223117/1512/6789/5156/57556/10894/6364/650/57007/3553/8840/55612/183/3162/3676/2316/811/961/7422/7474/…
BP	GO:0009611	response to wounding	325	0.335938	2.0541	4.01647e-09	5.17252e-07	3.89607e-07	2279	tags=49%	list=31%	signal=35%	581/1490/3479/5341/6850/4313/23452/6774/135228/5638/4321/6281/7076/6648/1281/1026/7448/71/1606/54209/246/2335/4756/80274/7852/5547/55959/2778/5270/4067/7035/10218/51330/8837/4780/5795/4192/3371/2876/960/116844/5329/5580/301/2192/966/23499/2717/2022/7538/7305/5156/5588/5321/10894/100506658/10461/8840/55612/79056/6556/3162/9315/4627/7168/79026/2316/2207/60681/79630/3611/7422/3694/7056/7474/6558/112…
BP	GO:0001817	regulation of cytokine production	433	0.30968	1.92183	4.20926e-09	5.30546e-07	3.99621e-07	2220	tags=44%	list=30%	signal=33%	7850/5743/3479/914/2597/718/1116/5788/51176/27159/8993/10365/6850/6774/55024/841/23213/27250/338382/8832/26137/225/10621/10457/4321/6441/5603/2950/719/4317/11006/929/2213/924/54209/2335/10225/100133941/3148/28984/55959/4067/490/27202/3303/284340/84868/55593/7481/5795/5371/4192/6675/301/1191/6591/2192/10010/1386/7189/10631/7538/1051/4282/7305/10417/5588/975/6772/9261/1604/10461/3553/8840/55612/183…
CC	GO:0009897	external side of plasma membrane	221	0.368848	2.20679	4.66376e-09	5.75585e-07	4.33545e-07	1716	tags=43%	list=23%	signal=34%	3579/914/6402/1441/5788/4897/931/84824/8832/3684/2015/2813/482/929/338339/2213/5169/3627/3821/80274/643/55576/100133941/7852/89886/4036/2239/2690/2936/283316/387837/1508/2028/5329/966/8516/1636/2022/9244/5156/57124/57007/2208/5314/940/3676/57493/2207/2217/811/2675/3694/7056/7412/3554/166647/84168/8792/7057/1901/947/2212/349667/460/51744/6403/100/6401/10462/916/22914/6693/3595/920/10663/925/974/38…
BP	GO:0002696	positive regulation of leukocyte activation	195	0.376845	2.23664	7.16851e-09	8.49324e-07	6.39732e-07	2236	tags=53%	list=30%	signal=38%	3479/914/4323/5788/51176/6850/10125/29851/6352/6347/1026/4317/11006/338339/11151/54209/100133941/4067/7704/2534/84868/3956/4192/301/7189/4254/4282/7305/5588/975/5321/1604/1947/3553/11221/1803/940/140885/9580/3329/861/961/7474/6659/6605/7412/4208/558/3552/1050/3635/8808/3485/2625/3707/3142/8440/7057/64581/3929/5896/6688/596/26258/6666/100/916/3071/22914/6693/920/30009/3932/26228/10148/60/939/567/5…
BP	GO:2000147	positive regulation of cell motility	370	0.322902	1.99253	7.03935e-09	8.49324e-07	6.39732e-07	2406	tags=49%	list=33%	signal=35%	5880/3579/5743/3958/3479/7018/4323/5788/4318/51176/7941/4313/6774/841/9448/54453/3312/10457/6352/6648/1435/6347/3309/719/6354/7448/71/8828/11151/414062/54209/3627/2185/2335/7852/4067/80031/8874/1902/284340/54910/4780/1277/5795/4192/2358/6608/301/6591/2277/5168/2192/4908/8817/4254/3488/10631/223117/1512/6789/5156/57556/10894/6364/650/57007/3553/8840/55612/183/3162/3676/2316/811/961/7422/7474/5962/…
BP	GO:0015908	fatty acid transport	52	0.531306	2.6432	1.40281e-08	1.62946e-06	1.22735e-06	1629	tags=58%	list=22%	signal=45%	5743/2171/6850/2181/225/1381/2168/28965/4067/1374/2182/301/1636/4282/5321/3553/7351/29015/2058/3552/6754/8792/348/7057/28232/22925/151176/255189/116362/5320
CC	GO:0030141	secretory granule	467	0.30027	1.86736	1.59654e-08	1.81882e-06	1.36998e-06	1515	tags=31%	list=21%	signal=26%	3579/3934/3958/3479/2171/7018/6402/718/1116/5788/6590/4318/8993/5284/51316/963/8804/9535/81619/10184/12/3312/135228/1215/7076/2950/26/3326/719/6280/3684/4317/6279/11010/2813/2357/929/10562/338339/56729/57126/79895/2335/1521/4332/5798/5547/5906/523/5270/547/5273/5049/11005/3303/51719/5315/1277/5795/2358/960/1508/116844/2934/23114/5329/5580/1191/2277/10213/966/653509/5787/1509/2717/1893/2495/1512/1…
BP	GO:0031347	regulation of defense response	439	0.303578	1.88587	2.21956e-08	2.48089e-06	1.86867e-06	2217	tags=44%	list=30%	signal=33%	5743/3479/718/5788/4318/8993/6850/7941/6774/8807/10125/841/27250/338382/55646/10621/3312/2099/6352/4321/1215/5603/2950/6280/4317/6279/285852/929/2213/5169/54209/246/92747/3821/10225/4332/185/3148/2778/4067/1374/2534/9470/11005/3303/284340/387837/747/84868/3075/4862/57590/5063/4780/3956/5371/4192/3371/2876/2358/5580/301/7189/5740/7538/1051/7305/975/6772/9572/9261/92610/5599/3553/8840/3055/11221/18…
BP	GO:0042110	T cell activation	308	0.326498	1.99146	2.60896e-08	2.86212e-06	2.15582e-06	1669	tags=37%	list=23%	signal=30%	5880/581/3958/3479/914/5788/51176/6850/6774/10125/841/8832/29851/10457/6352/6441/6347/11006/338339/2213/969/924/11151/54209/6775/3821/100133941/89886/4067/7704/2534/80031/11005/56603/84868/3956/4192/960/2934/301/1386/7189/3936/4254/1051/7305/5588/975/8654/1604/1947/3553/11221/1803/940/6556/140885/9580/3329/4627/7356/861/2207/961/6659/6605/7412/55824/677/6932/3552/8808/3485/2625/3707/80762/3142/54…
BP	GO:0002685	regulation of leukocyte migration	141	0.393803	2.26835	3.06764e-08	3.30413e-06	2.48875e-06	1653	tags=43%	list=22%	signal=34%	5880/3579/3958/4323/7941/6352/1435/6347/719/6354/9518/969/11151/54209/3627/2185/10164/9353/4067/27202/284340/5795/4192/2358/301/2277/100532736/4254/1893/4282/9435/975/10894/6364/26585/1803/3162/3676/811/961/23236/7422/7474/3554/3552/11117/134/8995/7057/57142/653/3929/6403/100/6401/3071/22914/6693/26228/5054
CC	GO:0070820	tertiary granule	102	0.4412	2.42463	3.51182e-08	3.64983e-06	2.74914e-06	2283	tags=61%	list=31%	signal=43%	3958/4318/8993/963/81619/3684/4317/2357/10562/338339/57126/79895/5547/5273/2358/116844/23114/966/5787/1509/2495/1512/1476/1604/8773/6616/8655/6556/140885/4069/1729/226/2207/961/3240/6709/3608/5269/2040/5768/3043/1535/127829/8514/3071/5004/567/5328/23191/5337/51646/1536/101/820/634/1520/3689/5724/5777/6813/1832/23250
BP	GO:0051249	regulation of lymphocyte activation	278	0.332547	2.01705	3.46972e-08	3.64983e-06	2.74914e-06	1686	tags=38%	list=23%	signal=30%	5880/3958/3479/914/4323/5788/51176/8993/6850/55024/10125/29851/10457/6352/6441/6347/1026/11006/2213/969/51237/11151/3821/4332/6664/100133941/4067/7704/2534/11005/56603/84868/3956/4192/301/7189/4254/1051/4282/7305/5588/975/8654/1604/1947/10461/3553/11221/1803/940/140885/9580/3329/7356/861/961/6659/6605/7412/55824/677/4208/558/6932/3398/3552/3635/8808/3485/2625/3707/80762/3142/8995/8440/6385/64581/…
BP	GO:1903039	positive regulation of leukocyte cell-cell adhesion	159	0.387107	2.26176	3.68578e-08	3.76458e-06	2.83558e-06	2216	tags=54%	list=30%	signal=39%	3479/5788/51176/6850/10125/8631/29851/6352/6347/11006/11151/10164/100133941/4067/7704/2534/84868/3956/4192/960/301/7189/4254/5588/9435/975/1604/1947/3553/11221/1803/940/140885/9580/3329/861/3676/961/6659/6605/7412/3552/8808/3485/2625/3707/3142/8440/5896/6403/6666/100/6401/916/3071/22914/6693/920/3932/10148/60/939/567/3593/942/912/51571/50943/23149/84861/199/101/729230/1445/3037/3119/3600/3606/356…
BP	GO:0060326	cell chemotaxis	181	0.370282	2.18575	4.57454e-08	4.59315e-06	3.45967e-06	2487	tags=56%	list=34%	signal=38%	5880/3579/3958/1441/51176/6850/7941/4313/9023/6352/6441/1435/6347/719/6280/6279/6354/11151/414062/151647/3627/2185/9353/643/185/7852/3148/4067/27202/1902/4015/284340/5795/4192/2358/5580/301/2277/8817/100532736/2022/4282/5156/5588/6364/57007/26585/3553/1803/9547/2207/811/1800/7422/7474/6558/7412/8792/8995/57580/7057/1901/3929/6367/3071/22914/10663/26228/3815/5054/6372/6288/9037/2549/79890/199/1910…
BP	GO:0045785	positive regulation of cell adhesion	290	0.329914	2.00626	4.9828e-08	4.91969e-06	3.70563e-06	2216	tags=47%	list=30%	signal=34%	3479/5788/51176/6850/10125/9448/8631/54453/29851/6352/6281/1435/6347/11006/7448/10562/11151/246/2185/10164/2335/100133941/4067/7704/2534/8874/1295/84868/25975/3956/5795/4192/960/30008/5329/301/2192/7189/151887/4254/6789/5588/9435/975/133584/84466/1604/1947/3553/7052/55612/11221/1803/940/140885/9580/3329/10109/7168/861/3676/2316/811/961/3611/7422/9265/7474/6659/51144/6605/7412/3552/6251/11117/8728…
BP	GO:0050729	positive regulation of inflammatory response	90	0.44944	2.44709	6.34744e-08	6.1643e-06	4.64311e-06	2560	tags=70%	list=35%	signal=46%	5743/718/7941/27250/5603/6280/4317/6279/54209/185/3956/4192/1051/975/3553/8840/183/940/1660/961/7474/26471/1050/4792/241/8792/8995/283131/3929/4818/26228/2209/5320/5054/3593/4258/8737/10318/51114/9180/101/834/729230/2896/3600/3606/90865/5008/5138/5294/7097/7098/7124/7132/6376/4023/6348/2113/837/51284/4363/64332/6223
BP	GO:0070661	leukocyte proliferation	182	0.365851	2.16047	6.98766e-08	6.6766e-06	5.02898e-06	2195	tags=50%	list=30%	signal=36%	5880/581/3958/3479/5788/51176/6850/931/10125/10457/6352/6441/2950/1435/1026/11006/2213/51237/11151/5169/54209/4332/6664/100133941/4067/2534/84868/5580/301/1191/7189/4254/1636/1051/4282/7305/5588/975/8654/1604/26585/1947/3553/940/6556/3329/7356/7412/4208/3552/3251/3635/3485/80762/8995/8440/598/4883/6385/596/100/916/3071/6693/22806/10148/5320/3815/3593/942/930/912/57162/50943/23228/7001/5813/199/38…
BP	GO:0045597	positive regulation of cell differentiation	473	0.294518	1.83365	8.02236e-08	7.54357e-06	5.682e-06	2220	tags=43%	list=30%	signal=32%	83643/5743/1490/3479/4323/5788/51176/6850/4897/6774/10125/841/338382/54453/6648/1435/3326/11006/8519/54209/2335/9353/53335/6664/185/100133941/7852/3148/28984/5906/3202/1385/5270/4067/4036/7704/5048/2690/8648/283149/3303/56603/55553/1002/694/1277/4192/116844/6608/7472/30008/301/6591/4017/6091/8817/7189/627/30812/23499/100532736/4254/64321/1636/2022/7538/1051/6789/7305/9472/4137/8654/6772/2817/1052…
BP	GO:0002250	adaptive immune response	260	0.335068	2.02321	1.03294e-07	9.27143e-06	6.98348e-06	2216	tags=48%	list=30%	signal=35%	718/5788/51176/6850/6774/8807/8832/8631/60468/720/713/5579/712/2015/11006/338339/2213/729/9214/969/924/54209/246/6775/2185/3821/4067/2534/84868/3956/5580/301/1191/7189/1512/5588/975/5321/1604/3553/2208/11221/940/6556/3329/6494/81622/219972/2207/730/55824/3554/4208/113/3251/3635/64170/2625/80762/3142/8792/8995/919/8809/64581/5896/2212/10865/51744/9156/733/100/10462/916/5551/3071/22914/6693/920/925…
BP	GO:0042060	wound healing	252	0.334402	2.01889	1.01197e-07	9.27143e-06	6.98348e-06	2279	tags=49%	list=31%	signal=35%	3479/5341/6850/23452/135228/5638/4321/6281/7076/1281/1026/7448/71/1606/246/2335/80274/7852/5547/2778/5270/4067/7035/10218/51330/8837/4780/5795/2876/960/116844/5329/5580/301/2192/966/23499/2717/2022/5156/5588/5321/100506658/10461/8840/55612/79056/6556/3162/4627/7168/79026/2316/2207/60681/3611/7422/3694/7056/7474/6558/2004/2624/558/3552/11117/4638/11093/10565/4921/7391/3170/3043/348/8525/7057/12886…
MF	GO:0004888	transmembrane signaling receptor activity	359	0.309824	1.90926	1.03294e-07	9.27143e-06	6.98348e-06	2475	tags=50%	list=34%	signal=35%	3579/7850/5157/3248/1441/187/5788/5284/84824/8807/10149/387509/147/11122/2099/11318/53637/719/2015/11006/2357/929/8828/2213/9214/969/924/54209/221395/8477/3821/643/185/7852/55504/1131/27202/2690/1902/9934/2831/1241/2358/960/6608/6091/5745/5787/2202/2022/1512/9244/5156/6332/8685/57211/10894/57007/3482/10461/2208/4360/10203/2207/4544/10266/2675/7056/5789/148/3459/3554/166647/558/5362/84168/8808/134…
BP	GO:0000165	MAPK cascade	395	0.30369	1.88107	1.16978e-07	1.0343e-05	7.7906e-06	2444	tags=49%	list=33%	signal=34%	50507/1490/3479/5052/7018/1116/5788/6850/55024/10125/27250/9448/142679/147/10457/5603/2950/9518/11006/2213/54209/246/2185/2335/100133941/55504/5906/4067/5048/2122/1000/2690/1902/6764/3301/284340/84868/54910/8837/5063/5795/2358/960/1410/5580/7498/6091/2192/4908/8817/1386/56981/7189/3489/57144/112464/5778/7538/1512/6789/4282/5156/57556/975/8685/9261/650/5599/57007/5997/3553/11221/5314/183/140885/93…
BP	GO:0045444	fat cell differentiation	126	0.402451	2.29015	1.2168e-07	1.06005e-05	7.98455e-06	1031	tags=36%	list=14%	signal=31%	83643/5743/11007/51316/57761/6648/56729/79689/221395/595/1385/7704/114882/2876/116844/6591/23414/1386/30812/7538/1051/6789/5156/9572/5167/1052/650/4929/5997/8840/11221/26580/9580/22809/3914/2308/23236/7422/7474/862/2624/677/25999/3398/1050
BP	GO:1901342	regulation of vasculature development	209	0.349564	2.08016	1.29624e-07	1.09699e-05	8.26283e-06	2421	tags=54%	list=33%	signal=37%	3579/718/187/1116/10365/6774/23213/90139/55810/10457/1215/6271/5230/5579/719/3627/2185/7852/28984/3202/2534/11005/10218/5315/4780/694/5371/4192/116844/1634/8817/1284/1386/5740/2022/1893/1512/57556/6772/6672/79805/55109/2296/26585/3553/140862/7052/3162/861/10266/7422/7474/6558/2624/9510/3552/10769/11117/2752/7057/641700/947/90993/56005/57142/221074/5054/7010/4086/10298/9037/2549/22905/7058/1536/16…
MF	GO:0030545	signaling receptor regulator activity	252	0.332421	2.00694	1.29624e-07	1.09699e-05	8.26283e-06	2422	tags=52%	list=33%	signal=36%	3958/3479/718/8993/9535/123920/130576/3312/10457/6352/7076/1435/6347/6354/9518/11006/56729/414062/151647/3627/2185/2335/3148/80031/3303/387837/10435/54910/7481/3956/4192/7472/1191/2277/4908/8817/627/2202/100532736/4254/3488/2022/223117/9244/4282/57556/3557/650/55258/26585/3553/1803/183/7873/9547/3911/7422/56300/7474/3490/27122/649/7043/3552/2201/3485/8995/348/64388/653/1114/151176/441549/2691/540…
BP	GO:0036230	granulocyte activation	35	0.577995	2.65153	1.31864e-07	1.10023e-05	8.2872e-06	2357	tags=83%	list=32%	signal=57%	3579/6850/8807/6352/3684/2213/57126/5169/5580/301/7305/2207/57580/6688/5320/6372/6338/820/729230/2896/3600/3606/3689/5724/5777/6813/7124/306/6348
BP	GO:0033993	response to lipid	486	0.287552	1.79089	1.4227e-07	1.17057e-05	8.81703e-06	1687	tags=33%	list=23%	signal=28%	5743/3248/477/5788/6590/4318/6850/4313/6774/841/27250/57048/3312/27063/2099/7431/6648/5563/2950/2706/6347/1026/5579/3684/4317/6279/929/54209/3627/2185/9353/10225/3148/3158/2778/1385/4067/1374/3032/7035/249/2690/1902/8648/4015/2354/3303/3301/56603/84868/55593/8837/7481/3667/1277/3371/2876/2326/6608/7472/1410/5580/301/8463/6591/340485/7189/1636/10631/7538/1051/1512/4282/10417/9572/6672/9261/2288/16…
BP	GO:0002181	cytoplasmic translation	116	0.416021	2.33294	1.4964e-07	1.2137e-05	9.14188e-06	2919	tags=78%	list=40%	signal=48%	6138/7311/5315/6164/23057/6217/3921/7458/6134/1981/1660/6171/6160/10480/22916/6201/7812/4736/4690/6122/6152/10642/6159/6210/200916/6173/6146/9349/6223/6135/6132/6137/27335/55364/8667/9045/6155/6193/6154/11224/6205/6141/8663/6158/6128/6133/4904/6231/6161/6175/6144/6129/6202/6139/25873/6187/6130/6188/6224/6181/26986/6229/6143/6165/6203/8665/6167/6142/6156/6168/8894/6169/6124/3646/6228/6227/2197/623…
BP	GO:0006959	humoral immune response	127	0.40245	2.28624	1.5161e-07	1.2137e-05	9.14188e-06	1750	tags=46%	list=24%	signal=35%	3958/2597/7018/718/5788/6590/8993/931/720/6352/713/6347/6280/712/6354/2213/729/9214/414062/54209/3627/2920/28984/11005/3075/1191/966/10417/975/6364/1604/3553/2208/940/6556/9547/4069/730/4208/2625/51297/140686/596/9156/733/6361/6367/5657/716/3512/4068/10148/567/57817/5450/29760/6372/130120
BP	GO:0045765	regulation of angiogenesis	207	0.349478	2.07793	1.6124e-07	1.27358e-05	9.5929e-06	2421	tags=54%	list=33%	signal=37%	3579/718/187/1116/10365/6774/23213/90139/55810/10457/1215/6271/5230/5579/719/3627/2185/7852/28984/3202/2534/11005/5315/4780/694/5371/4192/116844/1634/8817/1284/1386/5740/2022/1893/1512/57556/6772/6672/79805/55109/2296/26585/3553/140862/7052/3162/861/10266/7422/7474/6558/2624/9510/3552/10769/11117/2752/7057/641700/947/90993/56005/57142/221074/5054/7010/4086/10298/9037/2549/22905/7058/1536/168667/7…
BP	GO:0061061	muscle structure development	383	0.297983	1.84227	1.92855e-07	1.50325e-05	1.13229e-05	1488	tags=31%	list=20%	signal=26%	50507/3479/1674/10409/187/4323/51176/963/27250/2273/1063/9759/11096/27063/6648/9456/1281/9518/71/70/3627/4756/10791/6445/8470/221476/6664/1385/4036/1000/4209/283149/4015/56603/55553/9215/54910/8837/694/3956/2034/2876/6608/7472/30008/1410/2274/23414/129446/51177/2006/627/30812/8516/3488/2022/5156/2115/975/9472/27295/2817/84466/650/2296/5997/26585/23363/467/445/4627/3486/7168/6909/57493/1827/3911/8…
BP	GO:0097529	myeloid leukocyte migration	146	0.384906	2.22474	2.01891e-07	1.55325e-05	1.16994e-05	1653	tags=41%	list=22%	signal=33%	5880/3579/3958/1441/4323/6850/7941/4313/6352/6441/1435/6347/719/6280/6279/6354/2813/57126/151647/54209/3627/2185/9353/4067/5048/27202/284340/5795/4192/2358/301/2277/100532736/4254/4282/975/26585/3553/1803/140885/2207/1800/961/23236/7422/3554/3552/11117/8792/8995/57580/7057/57142/3929/6367/3071/5657/26228/3815/5054
BP	GO:0002521	leukocyte differentiation	348	0.306366	1.88463	2.30876e-07	1.75347e-05	1.32076e-05	1689	tags=35%	list=23%	signal=29%	581/914/28959/7018/4323/5788/4318/51176/8993/6850/6774/931/10125/841/29851/9759/135228/1435/11006/338339/2213/969/54209/6775/2185/3821/55509/1385/4067/7704/5048/11005/56603/9215/8581/8837/2719/3956/5795/4192/301/1386/7189/9452/4254/1051/7305/975/9644/650/10461/3553/8840/4783/11221/940/9580/7351/4627/861/3676/2207/7422/3694/2353/6659/6605/2624/7412/10234/677/558/6932/3398/3552/1050/9678/3635/8808/…
BP	GO:0045766	positive regulation of angiogenesis	110	0.407376	2.26877	2.37245e-07	1.77904e-05	1.34002e-05	2336	tags=59%	list=32%	signal=41%	3579/718/187/1116/6774/1215/6271/5579/719/2185/7852/5315/4780/694/4192/116844/8817/5740/2022/1893/1512/79805/55109/26585/3553/7052/3162/861/10266/7422/7474/2624/3552/11117/7057/947/56005/57142/221074/5054/7010/4086/10298/9037/2549/1536/168667/728/820/147372/23576/51752/2896/3689/3690/146850/64094/7098/7291/6376/306/358/1003/8742/1139
BP	GO:0022409	positive regulation of cell-cell adhesion	187	0.358692	2.12497	2.47821e-07	1.79035e-05	1.34854e-05	2240	tags=51%	list=30%	signal=37%	3479/5788/51176/6850/10125/8631/29851/6352/6347/11006/11151/10164/100133941/4067/7704/2534/84868/3956/4192/960/5329/301/7189/4254/5588/9435/975/84466/1604/1947/3553/11221/1803/940/140885/9580/3329/861/3676/961/7474/6659/6605/7412/3552/11117/8728/8808/3485/2625/3707/3142/3170/8440/5896/6403/22920/6666/100/6401/916/3071/22914/6693/920/3932/10148/60/939/567/3593/942/912/51571/50943/23149/84861/33887…
BP	GO:0043408	regulation of MAPK cascade	340	0.311679	1.91394	2.47821e-07	1.79035e-05	1.34854e-05	2424	tags=49%	list=33%	signal=35%	50507/1490/3479/5052/1116/5788/6850/55024/10125/27250/9448/142679/147/10457/2950/9518/11006/2213/54209/246/2185/2335/100133941/55504/5906/4067/5048/2122/1000/2690/1902/6764/3301/284340/84868/54910/8837/5063/5795/2358/960/5580/7498/6091/2192/4908/8817/56981/7189/3489/57144/112464/6789/4282/5156/57556/975/8685/650/57007/5997/3553/11221/5314/183/140885/9344/467/3486/2308/9611/23236/7422/7474/85407/3…
BP	GO:0032103	positive regulation of response to external stimulus	354	0.30742	1.89378	2.47821e-07	1.79035e-05	1.34854e-05	2217	tags=45%	list=30%	signal=33%	5880/3579/5743/718/6850/7941/8807/10125/27250/338382/10621/3312/2099/6352/4321/5603/1435/719/6280/4317/6279/6354/285852/7448/929/54209/92747/3627/2185/9353/3821/4332/185/7852/3148/4067/1374/2534/1902/3303/284340/84868/57590/5063/3956/5795/4192/2358/2277/4908/8817/7189/1051/4282/7305/5156/975/9572/9261/92610/5599/3553/8840/3055/183/940/3320/3329/6421/9865/81622/2316/811/1660/961/839/7422/7056/7474…
BP	GO:0002697	regulation of immune effector process	212	0.346994	2.06865	2.52309e-07	1.80082e-05	1.35642e-05	2220	tags=50%	list=30%	signal=36%	5880/3958/718/5788/8993/6850/8807/10125/8832/6280/3684/11006/2213/969/51237/924/57126/5169/54209/3821/10225/4067/11005/387837/84868/3075/3956/301/7189/966/4282/7305/10417/975/9261/1604/3553/2208/11221/940/3329/9865/7474/7043/2624/3554/558/3635/64170/2625/80762/3142/8995/8809/64581/57142/3929/6688/10865/51744/3071/22914/6693/7454/116449/3824/30009/3823/26228/4068/2209/567/3815/3593/942/135250/912/…
BP	GO:0007517	muscle organ development	188	0.359887	2.13322	2.64765e-07	1.86723e-05	1.40644e-05	1488	tags=37%	list=20%	signal=30%	3479/1674/10409/51176/2273/1063/27063/9456/1281/70/3627/10791/6445/6664/1385/4036/4209/283149/4015/56603/55553/9215/8837/2876/6608/7472/30008/1410/23414/129446/2006/30812/2022/2115/2817/84466/650/2296/467/445/7168/57493/1827/3911/10362/2353/6943/4000/26471/6525/4208/7490/78994/4638/7139/3142/7273/4607/10290/6876/6939/1958/5079/1901/10869/6498/92737/596/7832/93185
CC	GO:0005925	focal adhesion	279	0.32138	1.9498	2.77474e-07	1.93383e-05	1.45661e-05	3998	tags=81%	list=54%	signal=38%	5880/50507/4323/5788/9448/2273/309/3312/7431/3309/71/70/2185/8496/8470/1000/8874/3303/3371/960/2934/23114/5329/301/2274/129446/966/3936/8516/2022/157285/51466/975/8773/3482/3055/7052/55612/1803/6217/4627/9019/10109/79026/3676/847/2316/811/3611/3694/5962/1266/1466/22800/6251/7145/7408/54518/4921/129804/6385/6160/22919/90102/26258/2191/10787/22888/60/567/7171/7010/1464/5328/6201/10298/23191/214/505…
MF	GO:0140375	immune receptor activity	82	0.447089	2.39454	2.80812e-07	1.93434e-05	1.45699e-05	2164	tags=60%	list=29%	signal=43%	3579/7850/1441/5284/8807/719/11006/2357/2213/9214/3821/643/7852/27202/2690/2358/960/1512/9244/57007/2208/2207/2675/3459/3554/8808/8809/2859/2212/22914/3595/920/10663/3824/10148/2209/2057/3454/3556/3977/9180/728/729230/1234/1439/8322/3119/3566/3570
MF	GO:0005198	structural molecule activity	393	0.300947	1.86304	2.85946e-07	1.94706e-05	1.46658e-05	4031	tags=78%	list=55%	signal=38%	1674/1116/8483/7431/9456/1281/1404/7448/10562/71/4237/2335/6138/8470/7311/10204/636/1295/4359/51065/3996/1297/4133/1286/1277/1278/3371/10516/30008/1410/1634/2192/1284/1282/2006/23499/2202/8406/10631/5118/1893/6164/83872/4053/120/3162/3914/6217/3921/9019/6134/10109/4239/7168/79026/85301/633/3911/7045/6709/3490/1466/4000/10216/94239/1805/285855/6525/10383/55506/4001/2201/11117/7280/3918/2331/7277/7…
BP	GO:0002263	cell activation involved in immune response	162	0.372545	2.17978	3.03497e-07	2.04309e-05	1.5389e-05	2301	tags=54%	list=31%	signal=38%	5880/3958/5788/51176/8993/6850/6774/10125/8832/29851/3684/338339/2213/969/57126/11151/5169/54209/6775/2185/4067/80031/84868/3956/4192/301/9452/3936/7305/975/8773/940/6556/3329/56892/2207/2624/9678/2625/80762/3142/54518/8995/8809/3929/6688/51744/9156/100/4818/3071/6693/116449/30009/3815/3593/942/3394/5450/930/54537/5873/50943/23228/6338/729230/634/2242/2268/2896/3606/90865/3566/3570/3689/4853/5361…
BP	GO:0031589	cell-substrate adhesion	201	0.346566	2.05664	3.24396e-07	2.15924e-05	1.62639e-05	1393	tags=35%	list=19%	signal=29%	5880/1490/4323/9448/8631/54453/4321/6281/1435/1281/3684/7448/482/10562/71/11151/246/2185/2335/10225/158326/1009/8874/1295/25975/1277/5795/4192/10516/960/30008/2192/340485/23499/151887/8516/10631/6789/133584/10894/26585/10461/55612/5314/9344/10109/3676/2316/3911/811/3611/7422/3694/51144/7412/558/6251/84168/11117/11093/10018/26515/57580/7057/6385/1305/947/5770/25992/90102
BP	GO:0050727	regulation of inflammatory response	223	0.341456	2.0451	3.62559e-07	2.38645e-05	1.79753e-05	2501	tags=53%	list=34%	signal=36%	5743/3479/718/5788/4318/8993/6850/7941/6774/27250/2099/6352/1215/5603/2950/6280/4317/6279/2213/5169/54209/246/185/2778/4067/2534/284340/747/3956/4192/3371/2876/2358/5580/301/5740/7538/1051/975/9572/3553/8840/3055/11221/183/940/140885/7356/1660/961/7474/55737/26471/3554/1050/10769/8808/134/2625/80762/4792/241/8792/10062/8995/348/283131/3929/100/6401/4314/4818/6693/26228/2209/5320/57817/5054/3593/4…
BP	GO:0000902	cell morphogenesis	499	0.283025	1.76237	3.74906e-07	2.44059e-05	1.83832e-05	2463	tags=47%	list=33%	signal=33%	5880/50507/51176/10365/121512/4897/9448/84189/65059/29842/57689/6347/6354/56990/71/8828/11151/55843/4237/2185/2335/9353/4756/26999/53335/7852/1385/547/4067/4036/5048/1009/1000/120114/2245/2534/80031/8874/1902/283149/473/1272/3996/10435/1002/10678/54910/8609/4133/221061/5063/5795/4192/960/6608/23114/301/1191/4628/5168/6091/4908/51177/627/23499/100532736/64321/2717/10631/157285/223117/6789/51466/55…
BP	GO:0007159	leukocyte cell-cell adhesion	246	0.330799	1.99578	3.87614e-07	2.4959e-05	1.87997e-05	2216	tags=47%	list=30%	signal=34%	5880/3958/3479/6402/5788/51176/6850/10125/8631/29851/10457/6352/6441/6347/6280/6279/11006/969/57126/11151/10164/100133941/4067/7704/2534/84868/3956/4192/960/116844/301/7189/4254/1051/5588/9435/975/50512/8654/1604/1947/3553/11221/1803/940/140885/9580/3329/445/7356/861/3676/961/6659/6605/7412/55824/3552/8808/3485/2625/3707/80762/3142/8995/8440/6385/5896/387597/6403/441478/51148/6666/100/6401/916/30…
MF	GO:0003730	mRNA 3'-UTR binding	90	-0.252774	-3.13103	3.98649e-07	2.51233e-05	1.89235e-05	100	tags=31%	list=1%	signal=31%	22849/574411/100126333/406952/406933/407035/406919/406938/574450/407018/442900/406892/406936/619556/406990/406959/406996/574501/406987/406895/442901/442893/406932/406954/406931/406914/407015/407042
BP	GO:0002366	leukocyte activation involved in immune response	160	0.372664	2.18029	3.96879e-07	2.51233e-05	1.89235e-05	2301	tags=54%	list=31%	signal=38%	5880/3958/5788/51176/8993/6850/6774/10125/8832/29851/3684/338339/2213/969/57126/11151/5169/54209/6775/2185/4067/80031/84868/3956/4192/301/9452/3936/7305/975/8773/940/6556/3329/2207/2624/9678/2625/80762/3142/54518/8995/8809/3929/6688/51744/9156/100/4818/3071/6693/116449/30009/3815/3593/942/3394/5450/930/54537/5873/50943/23228/6338/729230/634/2242/2268/2896/3606/90865/3566/3570/3689/4853/5361/5294/…
BP	GO:0140053	mitochondrial gene expression	67	-0.30521	-3.1239	4.30224e-07	2.65596e-05	2.00054e-05	3962	tags=88%	list=54%	signal=41%	116541/51263/64951/51264/63931/64968/10128/55052/3028/54998/80222/26589/87178/29074/28977/64975/84545/64928/116540/51258/64981/64960/219927/28958/63875/25885/708/118487/2617/80324/9238/29088/55683/64965/22868/9692/65080/130916/55157/64216/55699/90806/51116/26995/79675/79828/64969/84172/64949/60493/51654/54516/64978/57505/5188/5442/56652/11222/219402
CC	GO:0034774	secretory granule lumen	194	0.34198	2.02814	4.30406e-07	2.65596e-05	2.00054e-05	1119	tags=30%	list=15%	signal=26%	3934/3479/2171/7018/718/1116/6590/8993/51316/8804/9535/12/3312/7076/2950/26/3326/6280/4317/6279/10562/56729/2335/1521/4332/5049/51719/5315/116844/2934/5580/1191/2277/10213/1509/2717/1893/1512/1476/4282/353/3671/3320/10916/4069/847/226/7078/3240/7422/6709/3608/7043/10383/5223/29789/2992/5768/7520
CC	GO:0030055	cell-substrate junction	286	0.319535	1.94165	4.47004e-07	2.72995e-05	2.05627e-05	3998	tags=80%	list=54%	signal=38%	5880/50507/4323/5788/9448/2273/309/3312/7431/3309/71/70/2185/8496/8470/1000/8874/3303/3371/960/2934/23114/5329/301/2274/129446/966/3936/8516/2022/157285/51466/83872/975/8773/3482/3055/7052/55612/1803/6217/4627/9019/10109/79026/3676/847/2316/811/3611/3694/5962/1266/1466/22800/6251/7145/7408/54518/4921/129804/6385/6160/22919/90102/26258/2191/10787/22888/60/567/7171/7010/1464/5328/6201/23676/10298/2…
BP	GO:0050870	positive regulation of T cell activation	142	0.376429	2.16855	4.66362e-07	2.81911e-05	2.12342e-05	2213	tags=53%	list=30%	signal=38%	3479/5788/51176/6850/10125/29851/6352/6347/11006/11151/100133941/4067/7704/2534/84868/3956/4192/301/7189/4254/5588/975/1604/1947/3553/11221/1803/940/140885/9580/3329/861/961/6659/6605/7412/3552/8808/3485/2625/3707/3142/8440/5896/6666/100/916/3071/22914/6693/920/3932/10148/60/939/567/3593/942/912/51571/50943/23149/84861/199/101/729230/1445/3119/3600/3606/3566/4690/146850/5777/7070
BP	GO:0042119	neutrophil activation	32	0.581654	2.59804	5.40767e-07	3.23586e-05	2.43733e-05	2264	tags=81%	list=31%	signal=57%	3579/6850/8807/6352/3684/2213/57126/5580/301/7305/2207/57580/6688/5320/6372/6338/820/2896/3600/3606/3689/5724/5777/6813/7124/306
BP	GO:0051050	positive regulation of transport	429	0.291057	1.8066	5.8323e-07	3.45506e-05	2.60244e-05	1714	tags=34%	list=23%	signal=28%	581/5743/3958/3479/7018/7447/718/187/5788/6850/931/2273/84236/2181/55646/27063/720/7222/6352/6281/481/6441/9456/6347/5579/3684/6279/7448/482/929/2213/56729/57126/54209/3627/6664/93974/81671/1131/28984/1385/490/1000/5108/636/1272/51201/760/2182/114882/4133/3667/2719/4780/5795/2358/6608/89866/5580/301/1191/4628/4908/6000/1051/55800/4282/975/9472/5321/650/100506658/6616/26585/5360/10461/3553/784/655…
BP	GO:0002449	lymphocyte mediated immunity	165	0.363851	2.13031	6.6971e-07	3.88957e-05	2.92972e-05	2216	tags=52%	list=30%	signal=37%	914/5052/718/5788/8807/10125/720/713/712/11006/2213/729/9214/924/11151/54209/3821/10225/387837/84868/5580/1191/7189/1512/975/1604/3553/2208/940/3329/81622/2207/730/3554/10383/3251/3635/64170/2625/80762/8809/2212/10865/9156/733/4818/5551/3071/22914/6693/925/3004/7454/116449/3824/30009/716/3823/4068/2209/939/6957/567/3593/135250/3539/930/10870/912/2885/54537/5873/51571/50943/441168/9390/84861/383/7…
MF	GO:0048018	receptor ligand activity	230	0.332741	1.99859	6.68372e-07	3.88957e-05	2.92972e-05	2422	tags=52%	list=33%	signal=36%	3958/3479/718/8993/9535/123920/3312/10457/6352/7076/1435/6347/6354/9518/56729/414062/151647/3627/2335/3148/80031/3303/10435/54910/7481/3956/4192/7472/1191/2277/4908/8817/627/2202/100532736/4254/3488/223117/9244/4282/57556/3557/650/55258/26585/3553/1803/183/7873/9547/3911/7422/56300/7474/3490/649/7043/3552/2201/8995/348/64388/653/1114/151176/441549/2691/54097/344901/6367/10148/2151/57817/3624/3593…
BP	GO:0051251	positive regulation of lymphocyte activation	177	0.356574	2.10036	6.95304e-07	3.99901e-05	3.01215e-05	2213	tags=50%	list=30%	signal=36%	3479/4323/5788/51176/6850/10125/29851/6352/6347/1026/11006/11151/100133941/4067/7704/2534/84868/3956/4192/301/7189/4254/4282/7305/5588/975/1604/1947/3553/11221/1803/940/140885/9580/3329/861/961/6659/6605/7412/4208/558/3552/3635/8808/3485/2625/3707/3142/8440/64581/5896/6688/596/26258/6666/100/916/3071/22914/6693/920/30009/3932/10148/60/939/567/3593/942/912/57162/54537/51571/50943/23149/84861/199/1…
BP	GO:0035278	miRNA-mediated gene silencing by inhibition of translation	25	-0.509475	-3.31741	7.65624e-07	4.31493e-05	3.25012e-05	59	tags=64%	list=1%	signal=64%	406952/406933/407035/406940/406938/407018/406892/406936/406990/406996/574501/407006/406987/406895/574457/406954
BP	GO:0002460	adaptive immune response based on somatic recombination of immune receptors built from immunoglobulin superfamily domains	178	0.354412	2.08902	7.72085e-07	4.31493e-05	3.25012e-05	2216	tags=51%	list=30%	signal=37%	718/5788/51176/6774/60468/720/713/712/11006/2213/729/9214/969/924/54209/6775/3821/84868/3956/5580/301/1191/7189/1512/5588/975/5321/1604/3553/2208/940/6556/3329/81622/2207/730/3554/4208/3251/3635/64170/2625/80762/3142/8995/8809/64581/2212/10865/9156/733/100/5551/3071/6693/920/925/3004/7454/3824/30009/716/10148/2209/939/6957/567/3593/135250/3539/930/912/54537/5873/51571/50943/9390/84861/383/729230/…
BP	GO:0022407	regulation of cell-cell adhesion	283	0.317284	1.92672	7.62028e-07	4.31493e-05	3.25012e-05	2248	tags=47%	list=30%	signal=34%	3958/3479/5788/51176/6850/10125/8631/29851/10457/6352/6441/6347/11006/969/11151/10164/100133941/28984/5270/4067/7704/2534/51201/84868/3956/4192/960/5329/5580/301/7189/4254/1051/5588/9435/975/8654/84466/1604/3557/650/1947/3553/11221/1803/5314/940/140885/9580/3329/445/7356/861/3676/961/7422/7474/5962/4072/6659/6605/7412/55824/3552/80139/11117/8728/8808/3485/2625/3707/80762/3142/8995/3170/8440/6385/…
BP	GO:0060537	muscle tissue development	237	0.33178	1.99453	7.96085e-07	4.40748e-05	3.31983e-05	1523	tags=35%	list=21%	signal=29%	50507/3479/51176/1063/27063/9456/1281/70/10791/6445/8470/221476/6664/1385/4036/4209/283149/4015/56603/55553/9215/8837/2876/6608/7472/30008/10052/2274/23414/129446/2006/30812/8516/3488/2022/5156/9472/2817/84466/650/2296/5997/26585/23363/467/7168/861/6909/57493/1827/811/10362/7422/2139/2353/6943/1466/4000/148/26011/26471/4208/7490/3398/4638/7139/10611/3142/5999/7273/4607/3776/1958/5079/1901/10869/4…
BP	GO:0060348	bone development	119	0.389855	2.19529	8.28247e-07	4.54309e-05	3.42197e-05	1040	tags=35%	list=14%	signal=31%	3479/4323/5788/23213/1281/158326/55959/2778/7704/5048/4209/249/2690/162466/4015/56603/9215/1277/8817/1386/2022/1893/7305/359845/8642/650/2296/26585/60676/8840/7052/871/85301/633/4054/3694/7043/10234/4208/285590/5358/3214
BP	GO:0009266	response to temperature stimulus	76	0.45174	2.39402	8.45271e-07	4.56692e-05	3.43992e-05	1339	tags=43%	list=18%	signal=36%	5743/3479/63982/51316/51022/3326/1026/3627/7852/3158/11080/4067/3303/3301/1153/1410/2729/4137/9261/3320/3162/3329/7351/56892/56925/2308/7067/2063/3552/134/4792/7057/51278
BP	GO:1904018	positive regulation of vasculature development	111	0.40285	2.24308	8.55719e-07	4.56692e-05	3.43992e-05	2336	tags=59%	list=32%	signal=41%	3579/718/187/1116/6774/1215/6271/5579/719/2185/7852/5315/4780/694/4192/116844/8817/5740/2022/1893/1512/79805/55109/26585/3553/7052/3162/861/10266/7422/7474/2624/3552/11117/7057/947/56005/57142/221074/5054/7010/4086/10298/9037/2549/1536/168667/728/820/147372/23576/51752/2896/3689/3690/146850/64094/7098/7291/6376/306/358/1003/8742/1139
BP	GO:0070372	regulation of ERK1 and ERK2 cascade	155	0.367106	2.13997	8.48866e-07	4.56692e-05	3.43992e-05	2441	tags=56%	list=33%	signal=38%	50507/1490/3479/1116/5788/6850/10125/10457/2950/54209/246/2185/2335/5906/4067/6764/284340/84868/8837/2358/960/2192/8817/112464/4282/5156/57556/8685/650/57007/3553/11221/5314/140885/467/7422/148/3552/84231/11117/64170/6754/3357/25778/4921/8792/348/59/152007/5770/4504/920/5320/3624/3976/7010/10318/4988/1846/284/8074/3491/168667/728/634/1436/1445/2047/3690/4853/5777/10253/81848/7124/6376/7430/1139/1…
BP	GO:1903037	regulation of leukocyte cell-cell adhesion	219	0.334703	2.00101	8.65063e-07	4.57556e-05	3.44643e-05	2216	tags=48%	list=30%	signal=35%	3958/3479/5788/51176/6850/10125/8631/29851/10457/6352/6441/6347/11006/969/11151/10164/100133941/4067/7704/2534/84868/3956/4192/960/301/7189/4254/1051/5588/9435/975/8654/1604/1947/3553/11221/1803/940/140885/9580/3329/445/7356/861/3676/961/6659/6605/7412/55824/3552/8808/3485/2625/3707/80762/3142/8995/8440/6385/5896/387597/6403/441478/6666/100/6401/916/3071/22914/6693/920/30009/3932/10148/5320/60/93…
MF	GO:0005539	glycosaminoglycan binding	147	0.371975	2.15027	9.86943e-07	5.17402e-05	3.8972e-05	2300	tags=53%	list=31%	signal=37%	1490/6402/5788/8993/23213/11096/10457/26/1404/6354/7448/8828/54209/3627/2335/9353/3697/55576/55959/5270/5048/3075/4192/960/30008/1634/151887/2022/10631/5118/26577/4053/133584/50512/10894/8840/343637/56925/633/8839/2675/7422/51144/9510/5802/7756/3918/59352/348/7057/129804/1305/5549/64388/6403/3512/50509/2257/6372/259/1463/130120/6288/9037/176/340419/11095/7058/3491/4745/5764/84870/64094/7097/17068…
BP	GO:0050766	positive regulation of phagocytosis	39	0.541678	2.54111	1.0672e-06	5.50956e-05	4.14994e-05	1820	tags=64%	list=25%	signal=49%	718/5788/55646/720/6441/6347/2213/54209/5795/2358/10461/6556/140885/2207/811/961/2624/1535/64581/2212/3071/26228/2209/197/5873
BP	GO:1903131	mononuclear cell differentiation	296	0.313783	1.91057	1.06955e-06	5.50956e-05	4.14994e-05	2214	tags=45%	list=30%	signal=33%	581/914/28959/4323/5788/4318/51176/8993/6850/6774/931/10125/841/29851/9759/1435/11006/338339/2213/969/54209/6775/2185/3821/55509/4067/7704/11005/56603/9215/8581/8837/3956/5795/4192/301/1386/7189/9452/1051/10461/3553/4783/11221/940/9580/7351/4627/861/3676/2207/7422/3694/2353/6659/6605/2624/7412/677/558/6932/3398/3552/1050/9678/3635/8808/2625/3707/80762/3142/8995/22985/57580/1958/8809/5079/5896/668…
BP	GO:0032943	mononuclear cell proliferation	160	0.365678	2.13942	1.08883e-06	5.56056e-05	4.18836e-05	1716	tags=41%	list=23%	signal=32%	5880/581/3958/3479/5788/51176/6850/931/10125/10457/6352/6441/1435/1026/11006/2213/51237/11151/4332/6664/100133941/4067/2534/84868/5580/301/7189/4254/1636/1051/4282/7305/5588/975/8654/1604/1947/3553/940/6556/3329/7356/7412/4208/3552/3251/3635/3485/80762/8995/8440/598/6385/596/100/916/3071/6693/22806/10148/5320/3593/942/930/912
BP	GO:0002237	response to molecule of bacterial origin	220	0.330385	1.97612	1.122e-06	5.68099e-05	4.27906e-05	2240	tags=48%	list=30%	signal=34%	5743/3248/6590/4318/841/27250/57048/27063/7431/6648/2950/2706/6347/4317/6279/929/2213/54209/3627/2920/10225/100133941/3148/3158/4067/3032/249/84868/55593/2876/2326/7189/1636/7538/1051/4282/10417/9572/9261/1604/5599/3553/3055/4360/11221/6556/140885/445/7356/7056/56300/7474/2353/4016/7412/4208/558/3552/64170/11093/4792/8792/26273/10062/2879/3929/10865/6403/6401/4314/22914/3595/26228/567/5054/3593/9…
BP	GO:0050673	epithelial cell proliferation	247	0.320672	1.93376	1.22356e-06	6.14268e-05	4.62682e-05	1404	tags=33%	list=19%	signal=27%	581/3479/187/4323/6774/23213/135228/2099/6352/4321/6347/1026/8828/6664/93974/185/5798/595/3148/28984/55959/3202/9500/1295/387837/8837/2719/4192/2876/116844/6608/7472/6591/4017/7498/6091/3488/2022/1893/7538/1051/6789/6772/9572/79805/55109/55612/11221/5314/3162/3486/1602/6909/3676/3911/79630/7422/7474/11202/3487/4830/2624/26471/677/4208/3398/80139/2625/3357/3142/3664/348/51162/598/7057/283131/947/1…
MF	GO:0030546	signaling receptor activator activity	234	0.328815	1.9765	1.49736e-06	7.45407e-05	5.61459e-05	2422	tags=52%	list=33%	signal=36%	3958/3479/718/8993/9535/123920/3312/10457/6352/7076/1435/6347/6354/9518/56729/414062/151647/3627/2335/3148/80031/3303/10435/54910/7481/3956/4192/7472/1191/2277/4908/8817/627/2202/100532736/4254/3488/2022/223117/9244/4282/57556/3557/650/55258/26585/3553/1803/183/7873/9547/3911/7422/56300/7474/3490/649/7043/3552/2201/8995/348/64388/653/1114/151176/441549/2691/54097/344901/6367/10148/2151/57817/3624…
BP	GO:0071345	cellular response to cytokine stimulus	485	0.28354	1.76611	1.54869e-06	7.64539e-05	5.7587e-05	2633	tags=49%	list=36%	signal=34%	3579/7850/83643/2597/1441/1116/5788/4046/51176/10365/6850/4313/6774/8807/841/338382/11122/9759/27063/6352/4321/7431/5603/2950/1435/6347/3309/3326/4317/6354/11006/71/8828/11151/414062/8519/54209/246/6775/3627/2185/9353/4332/643/100133941/7852/55504/1385/4067/5048/9470/2690/4015/3303/10435/10678/3667/4780/1277/5795/5371/960/2934/6091/10010/7189/5740/64321/10631/1893/7538/9244/26577/5156/9472/6772/9…
BP	GO:0002703	regulation of leukocyte mediated immunity	136	0.373318	2.13711	1.60806e-06	7.87287e-05	5.93004e-05	2216	tags=54%	list=30%	signal=38%	5880/718/5788/6850/8807/10125/8832/3684/11006/2213/924/57126/54209/3821/10225/4067/387837/84868/7189/7305/975/1604/3553/2208/940/3329/2624/3554/3635/2625/80762/8809/64581/6688/10865/3071/22914/6693/7454/116449/3824/30009/3823/26228/4068/2209/567/3815/3593/135250/912/6372/2885/54537/51571/50943/441168/9390/84861/383/729230/634/2242/2268/3606/3566/3689/146850/5724/5777/6813/7098/7124
BP	GO:0030101	natural killer cell activation	43	0.506439	2.43267	1.83404e-06	8.90561e-05	6.70793e-05	1668	tags=56%	list=23%	signal=43%	914/5052/5788/8993/10125/841/11151/3821/2534/84868/7305/10461/4783/558/8809/26258/51744/4818/22914/116449/3824/3823/4068/3593
BP	GO:0046651	lymphocyte proliferation	155	0.36095	2.10409	1.91272e-06	9.21217e-05	6.93883e-05	2195	tags=49%	list=30%	signal=35%	5880/581/3958/3479/5788/51176/6850/931/10125/10457/6352/6441/1026/11006/2213/51237/11151/4332/6664/100133941/4067/2534/84868/5580/301/7189/4254/1051/4282/7305/5588/975/8654/1604/1947/3553/940/6556/3329/7356/7412/4208/3552/3251/3635/3485/80762/8995/8440/6385/596/100/916/3071/6693/22806/10148/5320/3593/942/930/912/57162/50943/23228/7001/5813/199/383/729230/3600/3606/4690/5585/5294/5777
BP	GO:0071674	mononuclear cell migration	128	0.377763	2.14865	1.98762e-06	9.49567e-05	7.15238e-05	2375	tags=55%	list=32%	signal=38%	3579/3958/4323/7941/4313/9023/6352/6441/1435/6347/719/6354/969/11151/151647/54209/3627/2185/9353/7852/4067/284340/5795/4192/2358/301/100532736/1893/4282/975/6364/26585/140885/3676/811/961/23236/7474/6558/11117/2625/8792/8995/7057/1901/57142/653/22914/6693/30009/26228/5054/6288/199/1910/101/728/729230/1234/1436/3570/3690/83700/5294/7124/6376/3683/1230/6348/58494
BP	GO:0043299	leukocyte degranulation	38	0.536484	2.49986	2.11052e-06	0.000100022	7.53388e-05	2357	tags=76%	list=32%	signal=52%	5880/6850/10125/8832/3684/2213/57126/11151/4067/8773/3055/2624/6688/4818/3071/116449/3815/5873/729230/634/2242/2268/3566/3689/5294/5724/6813/306/6348
BP	GO:0043065	positive regulation of apoptotic process	309	0.301818	1.84005	2.18405e-06	0.000102685	7.73449e-05	1712	tags=35%	list=23%	signal=28%	3579/581/5743/3248/5788/4318/4313/841/27250/27063/6352/6648/6347/6280/6279/23612/9353/3001/4332/28984/3202/4067/7704/9500/8874/1902/8648/3301/51330/8837/7481/23787/694/3956/5371/2934/5580/301/1191/56981/1509/8406/5740/1636/1512/6789/57124/650/5599/3482/7052/183/3162/467/50486/3329/10628/6421/3486/9262/2308/3676/839/25816/7474/9040/55749/6659/5654/7043/665/10276/26471/4208/133746/25999/7490/84231/…
BP	GO:0043068	positive regulation of programmed cell death	317	0.299024	1.82752	2.42481e-06	0.000113107	8.51948e-05	1712	tags=35%	list=23%	signal=28%	3579/581/5743/3248/5788/4318/4313/841/27250/27063/6352/6648/6347/1026/6280/6279/23612/9353/3001/4332/28984/3202/4067/7704/9500/8874/1902/8648/3301/51330/8837/7481/23787/694/3956/5371/2934/5580/301/1191/56981/1509/8406/5740/1636/1512/6789/57124/650/5599/3482/7052/183/3162/467/50486/3329/10628/6421/3486/9262/2308/3676/839/25816/7474/9040/55749/6659/5654/7043/665/10276/26471/4208/133746/25999/7490/8…
BP	GO:0002526	acute inflammatory response	56	0.472534	2.38813	2.77651e-06	0.000127658	9.6155e-05	2216	tags=64%	list=30%	signal=45%	3579/5743/718/12/2950/2213/2335/5547/1051/3557/3553/445/3240/26471/3552/134/2625/241/8792/3929/2212/90/6693/2209/5004/9332/197/130120/6288/9180/1910/101/3570/5008/5294/7124
BP	GO:0006909	phagocytosis	138	0.368785	2.12033	2.77985e-06	0.000127658	9.6155e-05	2284	tags=52%	list=31%	signal=37%	718/5788/6850/338382/51454/55646/720/6441/6347/3684/56990/929/2213/11151/151647/54209/246/4067/2534/84286/5795/2358/2934/5580/301/653509/8406/7305/10417/8685/84466/10461/3055/2208/7052/6556/140885/4627/2207/811/961/2624/558/134/10062/7057/1535/64581/3929/2212/3071/5657/26228/2209/1089/3394/197/311/5873/5058/199/729230/1445/2268/3600/3689/3690/949/7097/26762/306/3683
BP	GO:0001909	leukocyte mediated cytotoxicity	73	0.447881	2.36056	2.8455e-06	0.000127856	9.63043e-05	2212	tags=63%	list=30%	signal=45%	914/5052/5788/8807/10125/3684/2213/11151/3821/387837/84868/1512/7305/10383/3251/3635/6688/2212/4818/5551/3071/22914/3004/3824/3823/26228/4068/2209/6957/567/3593/135250/10870/912/6372/2885/5873/51571/9390/6338/383/634/3606/146850/5777/6813
BP	GO:0030595	leukocyte chemotaxis	139	0.372256	2.14306	2.84892e-06	0.000127856	9.63043e-05	2240	tags=51%	list=30%	signal=36%	5880/3579/3958/1441/6850/7941/4313/9023/6352/6441/1435/6347/719/6280/6279/6354/11151/151647/3627/2185/9353/643/7852/4067/27202/284340/5795/4192/2358/301/2277/100532736/4282/26585/3553/1803/2207/811/1800/7422/7474/6558/8792/8995/57580/7057/1901/3929/6367/3071/22914/26228/3815/5054/6372/6288/79890/199/1910/101/728/729230/1234/1436/3570/3689/83700/5294/5764/6357/6376
CC	GO:0060205	cytoplasmic vesicle lumen	197	0.33749	2.00145	2.80594e-06	0.000127856	9.63043e-05	1653	tags=37%	list=22%	signal=29%	3934/3479/2171/7018/718/1116/6590/8993/51316/8804/9535/12/3312/7076/2950/26/3326/6280/4317/6279/10562/56729/2335/1521/4332/5049/51719/5315/116844/2934/5580/1191/2277/10213/1509/2717/1893/1512/1476/4282/353/3671/3320/10916/4069/847/226/7078/3240/7422/6709/3608/7043/10383/5223/29789/2992/5768/7520/25801/5552/7057/5701/5834/29952/100/5551/5657/2153/5004/567/5054
BP	GO:0050863	regulation of T cell activation	210	0.328867	1.95786	3.25351e-06	0.000144916	0.000109154	1669	tags=37%	list=23%	signal=30%	5880/3958/3479/914/5788/51176/6850/10125/29851/10457/6352/6441/6347/11006/969/11151/100133941/4067/7704/2534/11005/56603/84868/3956/4192/301/7189/4254/1051/5588/975/8654/1604/1947/3553/11221/1803/940/140885/9580/3329/7356/861/961/6659/6605/7412/55824/6932/3552/8808/3485/2625/3707/80762/3142/8995/8440/6385/5896/387597/441478/6666/100/916/3071/22914/6693/920/30009/3932/10148/5320/60/939/567/3593/942
BP	GO:0070371	ERK1 and ERK2 cascade	169	0.350214	2.0525	3.29453e-06	0.000145648	0.000109705	2441	tags=54%	list=33%	signal=37%	50507/1490/3479/7018/1116/5788/6850/10125/10457/2950/54209/246/2185/2335/5906/4067/6764/284340/84868/8837/2358/960/2192/8817/112464/1512/4282/5156/57556/8685/650/57007/3553/11221/5314/140885/467/7422/2887/148/677/3552/84231/11117/64170/6754/3357/25778/4921/8792/348/59/152007/5770/4504/920/5320/3624/3976/7010/10318/4988/1846/284/8074/3491/168667/728/634/1436/1445/2047/3690/4853/5777/10253/81848/71…
BP	GO:0050778	positive regulation of immune response	404	0.284544	1.76387	3.42223e-06	0.000150173	0.000113114	2226	tags=43%	list=30%	signal=32%	581/3958/718/5788/6850/931/55024/8807/10125/338382/123920/8631/10621/3312/2099/720/6352/713/4321/5579/719/6280/3684/712/6279/285852/11006/2357/929/2213/729/9214/924/57126/54209/92747/3821/4332/3148/28984/4067/1374/27202/2534/3303/84868/3075/57590/5063/5795/2358/5580/301/1191/7189/966/7305/5588/975/9572/9261/5321/1604/92610/5599/3553/3055/2208/784/940/6556/3320/3329/6421/9865/81622/2207/730/1660/9…
BP	GO:0031349	positive regulation of defense response	276	0.308438	1.8705	3.62927e-06	0.000158087	0.000119075	2217	tags=45%	list=30%	signal=33%	5743/718/6850/7941/8807/10125/27250/338382/10621/3312/2099/6352/4321/5603/6280/4317/6279/285852/929/54209/92747/3821/4332/185/3148/4067/1374/2534/3303/84868/4862/57590/5063/3956/4192/2358/7189/1051/7305/975/9572/9261/92610/5599/3553/8840/3055/183/940/3320/3329/6421/9865/81622/1660/961/839/7474/81926/26471/4208/5802/1050/11117/7105/9641/64170/7520/10133/4792/241/8792/10062/8995/283131/1535/64581/5…
BP	GO:1903557	positive regulation of tumor necrosis factor superfamily cytokine production	69	0.437644	2.28678	4.08929e-06	0.000176744	0.000133128	2357	tags=62%	list=32%	signal=43%	914/5788/6850/6774/26137/4317/929/2213/84868/5795/1191/4282/7305/10417/9261/1660/7474/3459/3552/64170/10564/7057/1535/64581/3929/2212/10865/6693/2209/5004/3593/942/8737/1536/101/729230/90865/5724/7097/7098/7291/4023/6348
BP	GO:0002768	immune response-regulating cell surface receptor signaling pathway	203	0.330905	1.96372	4.11727e-06	0.000176744	0.000133128	1689	tags=37%	list=23%	signal=30%	581/3958/718/5788/5284/6850/931/55024/338382/123920/8631/5579/719/3684/11006/2357/929/338339/2213/9214/54209/92747/3821/4332/100133941/4067/27202/2534/387837/57590/5063/5795/2358/5580/7189/7305/5588/975/9572/5599/3055/2208/784/940/9865/2207/961/4208/3635/2625/4792/10062/919/8525/1535/64581/3929/2212/596/100/916/3071/22914/925/974/3824/3932/7294/3823/26228/4068/2209/3815/3539/930/29760
BP	GO:1903706	regulation of hemopoiesis	239	0.316754	1.90564	4.25142e-06	0.00018119	0.000136477	1678	tags=36%	list=23%	signal=29%	914/28959/1441/4323/5788/51176/8993/6850/6774/10125/841/338382/1435/11006/2213/969/54209/2185/3148/3202/1385/4067/7704/4015/11005/3303/56603/3956/4192/301/6591/7189/4254/7538/1051/7305/6772/11221/940/9580/56892/861/2353/6659/6605/2624/10234/677/4208/558/6932/3398/1050/3635/8808/2625/3707/80762/4792/3142/8792/4212/8995/22985/51621/130733/5896/6688/151176/441478/6666/9935/100/81501/3071/920/29909/3…
BP	GO:0032496	response to lipopolysaccharide	207	0.327852	1.94935	4.32054e-06	0.000182821	0.000137705	2240	tags=47%	list=30%	signal=34%	5743/3248/6590/4318/841/27250/57048/27063/7431/6648/2950/2706/6347/4317/6279/929/54209/3627/10225/3148/3158/4067/3032/249/84868/55593/2876/2326/7189/1636/7538/1051/4282/10417/9572/9261/1604/5599/3553/3055/4360/11221/6556/140885/445/7356/7056/56300/7474/2353/4016/7412/4208/558/3552/11093/4792/8792/26273/10062/2879/3929/10865/6403/6401/4314/22914/3595/26228/567/5054/3593/942/3394/23097/4258/6372/34…
BP	GO:0050764	regulation of phagocytosis	56	0.466085	2.35554	4.42837e-06	0.000186055	0.000140141	2214	tags=62%	list=30%	signal=44%	718/5788/6850/55646/720/6441/6347/2213/54209/246/5795/2358/10461/3055/7052/6556/140885/2207/811/961/2624/1535/64581/2212/3071/5657/26228/2209/197/5873/1445/2268/3600/949/7097
BP	GO:0040007	growth	463	0.271285	1.68782	4.52792e-06	0.000188897	0.000142282	1583	tags=30%	list=21%	signal=25%	11007/3479/10409/4323/10365/4897/6774/51316/84189/2273/65059/29842/2099/1435/1281/1026/5579/6280/6279/55224/9518/8828/2185/2335/9353/8470/221476/26999/53335/185/7852/2778/3202/1385/5270/5048/80031/2690/10404/3303/9215/2182/1002/8837/4133/7481/2719/694/5795/5371/4192/3371/2876/6608/9462/7472/1410/301/23414/1386/56981/627/23168/23499/57144/64321/3488/10631/1893/6789/5588/975/9472/4137/5167/2296/599…
BP	GO:0002687	positive regulation of leukocyte migration	93	0.405055	2.21544	5.08291e-06	0.000210567	0.000158605	2375	tags=58%	list=32%	signal=40%	5880/3579/3958/4323/7941/6352/1435/719/6354/11151/54209/3627/2185/284340/5795/4192/2358/2277/4254/10894/6364/3676/811/961/7422/7474/3554/3552/8995/7057/57142/3929/6403/6401/3071/6693/5054/199/101/728/729230/1436/3570/3690/83700/5724/5764/7070/7124/6376/83483/1230/6348/58494
BP	GO:0050853	B cell receptor signaling pathway	38	0.524584	2.44441	5.64351e-06	0.000232168	0.000174875	1776	tags=61%	list=24%	signal=46%	581/5788/6850/931/55024/123920/5579/2213/9214/4332/4067/975/4208/4792/596/3071/974/3932/26228/3539/930/29760/2885
BP	GO:0015909	long-chain fatty acid transport	31	0.558445	2.45846	6.08787e-06	0.000248721	0.000187343	1629	tags=61%	list=22%	signal=48%	2171/6850/2181/225/2168/28965/1374/301/1636/4282/5321/7351/2058/6754/348/7057/22925/255189/5320
BP	GO:0010827	regulation of D-glucose transmembrane transport	43	0.490691	2.35702	6.16792e-06	0.000250265	0.000188506	1567	tags=51%	list=21%	signal=41%	3479/2171/718/57761/5579/114882/3667/2719/4780/1636/5167/100506658/3553/2887/25999/55600/6041/8682/6506/23596/151176/344901
MF	GO:0050839	cell adhesion molecule binding	350	0.286365	1.76211	6.60175e-06	0.000266046	0.000200393	3026	tags=57%	list=41%	signal=35%	1490/3479/5052/3939/4323/6850/4897/11122/57689/11096/3312/10457/3309/1281/3326/3684/7448/10562/57126/8496/2335/6138/4756/4067/1656/1009/1000/1272/3303/1002/5315/25975/5795/3371/10516/23114/301/2192/5787/3936/23499/8516/10631/6164/975/6772/8642/3553/8840/2208/55612/7112/140885/28316/3921/4627/7458/51100/79026/3676/226/2316/3911/811/8839/1627/961/3611/7045/3694/6709/5962/5789/1266/4072/7412/26011/8…
BP	GO:0003341	cilium movement	74	-0.256842	-2.9297	7.04526e-06	0.000282001	0.00021241	3001	tags=72%	list=41%	signal=43%	79819/23230/8701/54768/1768/361/146845/152110/55779/25911/55582/126820/161502/80217/80127/92749/8382/84229/64446/63978/114327/56171/151195/79582/27148/255101/164781/200373/493/29922/55811/257177/480/25790/127602/644890/219681/219670/11092/389799/286207/117155/6652/25876/8195/26074/164395/57119/54585/338/8632/55726/27019
BP	GO:0007200	phospholipase C-activating G protein-coupled receptor signaling pathway	63	0.454999	2.35393	7.15467e-06	0.000284458	0.000214261	1342	tags=44%	list=18%	signal=37%	3579/5341/147/2099/9456/5579/719/2357/1606/185/1131/27202/1902/636/1241/2358/5745/7052/183/2782/23236/7422/7474/148/3357/5330/8525/1901
BP	GO:0014706	striated muscle tissue development	226	0.321272	1.92887	7.43332e-06	0.000293567	0.000221122	1523	tags=35%	list=21%	signal=28%	50507/3479/51176/1063/27063/9456/70/10791/6445/8470/221476/6664/1385/4036/4209/283149/4015/56603/55553/9215/8837/2876/6608/7472/10052/2274/23414/129446/2006/30812/2022/5156/9472/2817/84466/650/2296/5997/26585/23363/467/7168/861/6909/57493/1827/811/10362/7422/2139/2353/6943/4000/148/26011/26471/4208/7490/3398/7139/10611/3142/5999/7273/4607/3776/1958/5079/1901/10869/4629/653/6498/92737/596/7832/931…
CC	GO:0031983	vesicle lumen	198	0.335518	1.99117	7.71891e-06	0.000302827	0.000228097	1653	tags=36%	list=22%	signal=29%	3934/3479/2171/7018/718/1116/6590/8993/51316/8804/9535/12/3312/7076/2950/26/3326/6280/4317/6279/10562/56729/2335/1521/4332/5049/51719/5315/116844/2934/5580/1191/2277/10213/1509/2717/1893/1512/1476/4282/353/3671/3320/10916/4069/847/226/7078/3240/7422/6709/3608/7043/10383/5223/29789/2992/5768/7520/25801/5552/7057/5701/5834/29952/100/5551/5657/2153/5004/567/5054
BP	GO:0002705	positive regulation of leukocyte mediated immunity	77	0.423033	2.2464	7.92496e-06	0.000305337	0.000229988	2216	tags=60%	list=30%	signal=42%	718/5788/8807/10125/3684/924/57126/54209/3821/7189/7305/975/1604/3553/2208/940/3329/3554/2625/8809/64581/6688/10865/22914/116449/3824/30009/3823/26228/4068/2209/567/3815/3593/135250/912/54537/51571/50943/9390/84861/383/3606/3689/5724/7124
BP	GO:0072593	reactive oxygen species metabolic process	130	0.362294	2.0651	7.88954e-06	0.000305337	0.000229988	1569	tags=38%	list=21%	signal=30%	5880/50507/1490/5052/6850/225/6441/6648/2950/1026/3684/57126/151647/2185/2176/93974/185/5547/3039/2534/8837/4780/10516/2876/2358/1410/5580/7498/7305/4137/9644/183/140885/7351/2308/847/3240/285590/10811/3043/57580/7057/1535/2878/64581/22925/596/4314/4504
BP	GO:0001501	skeletal system development	285	0.297956	1.80952	7.98907e-06	0.000305337	0.000229988	1527	tags=32%	list=21%	signal=26%	1490/3479/5052/4323/1116/5788/4318/4313/23213/7076/1281/1404/6664/158326/55959/2778/3202/7704/5048/1009/4209/249/2690/162466/4015/56603/55553/9215/7481/1277/1278/4192/960/6591/4017/8817/5745/1386/2202/3215/2022/1893/7305/5156/359845/8642/650/2296/26585/60676/8840/7052/9496/871/85301/633/861/3911/7067/129642/7045/4054/7422/3694/7474/4522/649/4774/7043/10234/4208/285590/5358/2201/3214/2625/5396/492…
BP	GO:0060284	regulation of cell development	444	0.272468	1.69342	7.98907e-06	0.000305337	0.000229988	2240	tags=42%	list=30%	signal=31%	3479/914/28959/1441/4323/5788/51176/8993/6850/6774/8553/10125/841/338382/6281/1435/11006/2213/969/54209/2185/2335/9353/53335/6664/7852/3148/3202/1385/5270/4067/4036/7704/5048/5108/80031/4015/11005/3303/56603/1002/4133/3956/4192/6608/7472/301/6591/6091/7189/627/30812/23499/4254/1636/7538/1051/7305/4137/8654/359845/6772/9572/650/3553/7052/11221/940/9580/23363/56892/861/1627/23236/7422/7474/5789/235…
BP	GO:0070663	regulation of leukocyte proliferation	147	0.352887	2.03993	9.26728e-06	0.000351919	0.000265074	2195	tags=49%	list=30%	signal=35%	5880/3958/3479/5788/6850/10457/6352/6441/2950/1435/1026/11006/2213/51237/11151/5169/4332/6664/100133941/4067/84868/301/7189/4254/1051/4282/7305/5588/975/8654/1604/26585/1947/3553/940/7356/7412/4208/3552/3635/3485/80762/8995/8440/598/6385/596/100/916/3071/6693/22806/10148/5320/3815/3593/942/912/57162/50943/199/383/729230/1437/1436/1439/3600/3606/90865/4690/5585/5777
BP	GO:0032760	positive regulation of tumor necrosis factor production	66	0.439406	2.28419	1.00875e-05	0.000380626	0.000286697	2357	tags=62%	list=32%	signal=43%	914/5788/6850/6774/26137/4317/929/2213/84868/5795/1191/4282/7305/10417/9261/1660/7474/3459/3552/64170/10564/7057/1535/64581/3929/2212/10865/6693/2209/5004/3593/8737/1536/729230/90865/5724/7097/7098/7291/4023/6348
CC	GO:0042581	specific granule	97	0.386243	2.11812	1.03464e-05	0.000387926	0.000292196	2284	tags=55%	list=31%	signal=38%	3934/1116/6590/8993/963/81619/26/719/3684/4317/10562/338339/56729/57126/79895/5906/5795/2358/116844/5329/966/5787/1509/8773/6616/4069/961/3240/6709/3608/2040/5768/1535/8514/5004/932/567/5328/311/5873/23191/5337/1536/101/383/820/634/3689/5777/6813/306/23250/3683
BP	GO:0006897	endocytosis	366	0.281041	1.73265	1.04899e-05	0.000390833	0.000294385	2284	tags=43%	list=31%	signal=31%	3579/3958/7018/718/187/5788/6850/338382/8804/51606/51454/54453/55646/720/6441/6347/3684/11006/7448/56990/929/71/2213/9214/57126/11151/151647/54209/246/55576/4067/4036/2534/84286/2690/1902/636/821/2719/5795/2358/2934/5580/301/1191/4908/10868/653509/8406/7305/10417/975/8685/9261/6457/84466/10894/57007/26585/3482/10461/3055/2208/7052/4360/1803/6556/140885/10203/4627/115677/3676/2207/811/10266/961/74…
BP	GO:0071363	cellular response to growth factor stimulus	414	0.276192	1.71195	1.07678e-05	0.000398678	0.000300295	1422	tags=29%	list=19%	signal=25%	3248/1490/51176/6774/23213/27250/27063/135228/6352/8483/6347/3309/1281/3326/5579/9518/7448/8828/11151/9353/4756/26999/6664/55959/5906/1385/4036/2534/283149/4015/3303/55553/8837/2719/1277/1278/5371/960/116844/7472/301/6591/2277/1634/7498/6091/4908/8817/1284/1386/627/100532736/8516/2022/10631/7538/5156/57556/2729/4053/4137/2817/9261/650/2296/92154/387914/26585/10461/3553/55612/183/9315/6909/847/102…
MF	GO:0003735	structural constituent of ribosome	104	0.388637	2.14485	1.10279e-05	0.000403918	0.000304241	3540	tags=85%	list=48%	signal=45%	6138/7311/51065/6164/6217/3921/6134/285855/6171/6160/51021/6201/4736/6122/6152/6159/6210/200916/6173/6146/9349/6223/6135/28973/6132/6137/6166/9045/6155/6193/6154/11224/6205/6141/6158/6128/6133/6231/6161/6175/6144/6129/6202/6139/25873/6187/6130/6188/6224/6181/6229/6143/6165/6203/6192/6167/6142/6156/6168/6169/6124/6228/6227/2197/6232/6235/6157/6206/6170/6125/6208/23521/6136/6218/6176/122704/64979/9…
BP	GO:0007186	G protein-coupled receptor signaling pathway	359	0.283391	1.74637	1.10457e-05	0.000403918	0.000304241	2389	tags=45%	list=32%	signal=32%	5880/3579/5157/3248/718/187/5341/10149/387509/147/2099/6352/11318/9456/6347/53637/5579/719/6354/2015/2357/1606/414062/54209/64407/3627/2185/221395/9353/8477/643/185/7852/1131/2778/4067/27202/55970/2534/1902/636/9934/760/2831/1241/2358/6608/301/6091/6000/5745/10868/1636/8685/9472/57211/2296/57007/5997/3482/7052/183/10203/85397/2782/3925/2316/4544/5660/776/10266/23236/7422/7474/55737/6004/148/16664…
CC	GO:0101002	ficolin-1-rich granule	119	0.369697	2.08178	1.11347e-05	0.000404674	0.000304811	1042	tags=34%	list=14%	signal=29%	3958/4318/9535/3312/2950/3326/2357/338339/4332/5547/5273/5049/3303/51719/5315/2358/1508/116844/2934/23114/10213/1509/2495/1512/1476/4282/1604/23412/8655/6556/3320/140885/1729/847/226/2207/3608/5269/5223/2992
BP	GO:0022604	regulation of cell morphogenesis	125	0.363633	2.06745	1.1927e-05	0.000430826	0.000324509	907	tags=32%	list=12%	signal=29%	5880/121512/6347/6354/56990/11151/55843/2185/2335/53335/7852/5048/2245/2534/8874/1902/283149/10435/221061/960/301/4628/5168/51177/23499/157285/116985/3055/9344/23363/4627/7168/1729/226/1627/25805/7422/7474/5962/5789
BP	GO:0070374	positive regulation of ERK1 and ERK2 cascade	106	0.37819	2.09795	1.20113e-05	0.000431243	0.000324823	2441	tags=58%	list=33%	signal=39%	50507/1490/3479/1116/5788/10457/54209/246/2185/5906/6764/284340/84868/8837/2358/960/8817/112464/4282/5156/8685/650/57007/7422/148/3552/64170/6754/3357/25778/4921/8792/348/59/152007/4504/920/5320/3624/7010/4988/284/8074/168667/728/1436/3690/4853/10253/7124/6376/1139/1230/6348/255743/408/5159/56034/3084/9378/3383
BP	GO:0061448	connective tissue development	166	0.343719	2.01352	1.23208e-05	0.000439688	0.000331184	1500	tags=36%	list=20%	signal=29%	1490/1116/23213/7076/1435/1281/1396/55959/3158/3202/7704/4209/2690/8648/4015/55553/9215/8837/8609/7481/1277/4192/960/9462/6591/4017/8817/5745/1386/30812/2202/1893/359845/650/26585/8840/871/85301/633/861/7067/129642/7045/4054/7474/649/4774/4208/285590/7490/2625/5396/59/1958/947/653/6688/10865/2487/6615
MF	GO:0005201	extracellular matrix structural constituent	112	0.377344	2.10268	1.26881e-05	0.000450085	0.000339015	1436	tags=39%	list=19%	signal=32%	1116/8483/1281/1404/7448/4237/2335/1295/1297/1286/1277/1278/3371/10516/30008/1634/2192/1284/1282/2006/2202/8406/10631/5118/1893/83872/4053/3914/4239/85301/633/3911/7045/3490/10216/1805/2201/11117/3918/2331/7057/1305/5549/157869
MF	GO:0017171	serine hydrolase activity	73	0.430904	2.27108	1.32081e-05	0.000462375	0.000348273	2353	tags=62%	list=32%	signal=42%	4323/4318/4313/84236/5638/4321/1215/4317/7113/3001/360226/5547/1636/1512/1803/79056/1515/3240/11202/5654/649/23478/5327/196294/29952/2191/4314/3003/3004/5657/716/4319/5328/13/7177/6768/629/101/1520/4322/8492/5125/2159/57552/64499
BP	GO:0034762	regulation of transmembrane transport	236	0.311669	1.87421	1.31298e-05	0.000462375	0.000348273	2240	tags=45%	list=30%	signal=32%	581/3479/477/2171/718/187/4318/931/2273/57761/7222/3762/481/9456/6347/5579/482/11151/54209/3627/2185/81671/1131/4067/3790/2534/760/114882/3667/51719/2719/4780/5371/6000/91404/1636/9472/5167/5664/100506658/5997/3553/784/183/7351/79026/1729/2316/4947/776/783/2887/23704/1080/25999/7779/2040/55600/6041/5999/51297/8682/6506/7057/1535/4735/7871/2859/23596/151176/8864/596/8514/8501/53827/344901/1193/60/…
BP	GO:0010720	positive regulation of cell development	229	0.309643	1.85963	1.32687e-05	0.000462375	0.000348273	2263	tags=46%	list=31%	signal=33%	4323/5788/51176/6850/10125/841/1435/11006/54209/2335/9353/53335/6664/7852/1385/5270/4067/4036/7704/5048/1002/4192/6608/7472/301/6091/7189/627/30812/23499/4254/1636/7305/4137/8654/650/3553/7052/11221/9580/23363/861/1627/7422/5789/2353/6659/6605/26011/51199/677/558/3398/7779/3635/8808/2625/7520/3707/6692/3142/8792/22985/64581/6498/5896/6688/27067/596/6666/100/81501/3071/920/60/939/3815/3593/942/397…
BP	GO:0032944	regulation of mononuclear cell proliferation	131	0.365991	2.08928	1.37542e-05	0.000473721	0.000356818	1669	tags=40%	list=23%	signal=32%	5880/3958/3479/5788/6850/10457/6352/6441/1435/1026/11006/2213/51237/11151/4332/6664/100133941/4067/84868/301/7189/4254/1051/4282/7305/5588/975/8654/1604/1947/3553/940/7356/7412/4208/3552/3635/3485/80762/8995/8440/598/6385/596/100/916/3071/6693/22806/10148/5320/3593/942
BP	GO:0070848	response to growth factor	426	0.274518	1.70341	1.36855e-05	0.000473721	0.000356818	1422	tags=29%	list=19%	signal=25%	3248/1490/51176/6774/23213/27250/27063/135228/6352/8483/6347/3309/1281/3326/5579/9518/7448/8828/11151/9353/4756/26999/6664/55959/5906/1385/4036/2534/283149/4015/3303/55553/8837/2719/1277/1278/5371/3371/960/116844/7472/301/6591/2277/1634/7498/6091/4908/8817/1284/1386/627/100532736/8516/2022/10631/7538/5156/57556/2729/4053/4137/2817/9261/650/2296/92154/387914/26585/10461/3553/55612/183/9315/7356/69…
MF	GO:0008236	serine-type peptidase activity	71	0.425569	2.23277	1.42223e-05	0.00048701	0.000366828	2353	tags=61%	list=32%	signal=42%	4323/4318/4313/84236/5638/4321/1215/4317/7113/3001/360226/5547/1636/1512/1803/79056/1515/3240/11202/5654/649/23478/5327/196294/29952/2191/4314/3003/3004/5657/716/4319/5328/7177/6768/629/101/1520/4322/8492/5125/2159/64499
CC	GO:0035097	histone methyltransferase complex	34	-0.390852	-2.96621	1.43938e-05	0.000487252	0.000367011	3348	tags=85%	list=45%	signal=47%	259282/6880/8607/84661/3720/91272/8085/4221/125476/8726/5929/6045/11091/26147/23135/23269/23054/51230/63925/6874/26168/23067/6879/4297/7403/9739/79447/27043/5928
BP	GO:0070665	positive regulation of leukocyte proliferation	87	0.397577	2.15327	1.43898e-05	0.000487252	0.000367011	2176	tags=54%	list=30%	signal=39%	5880/3479/5788/6850/6352/1435/1026/11151/100133941/4067/84868/301/7189/4254/4282/5588/975/1604/1947/3553/940/7412/4208/3552/3485/8440/598/596/100/916/3071/6693/10148/3815/3593/942/912/57162/50943/199/729230/1437/1436/1439/3600/3606/4690
CC	GO:0072562	blood microparticle	66	0.435069	2.26164	1.45231e-05	0.000487669	0.000367325	1738	tags=50%	list=24%	signal=39%	72/7018/718/12/3312/720/713/7448/71/70/2335/3697/5858/3039/3303/3075/2934/1191/2022/183/3240/2040/3043/348/733/716/3512/5004/60/3539/259/197/213
BP	GO:0001659	temperature homeostasis	97	0.382986	2.10027	1.45708e-05	0.000487669	0.000367325	1538	tags=39%	list=21%	signal=31%	5743/3934/2171/6850/6774/51316/11096/4237/7852/2778/249/2034/2876/2104/1051/9572/3553/26580/50486/7351/2308/7067/7422/2887/216/3552/134/8792/10062/33/7090/2271/4883/1958/8809/79813/8864/2628
BP	GO:0050670	regulation of lymphocyte proliferation	128	0.359603	2.04536	1.47344e-05	0.000490375	0.000369362	1669	tags=40%	list=23%	signal=31%	5880/3958/3479/5788/6850/10457/6352/6441/1026/11006/2213/51237/11151/4332/6664/100133941/4067/84868/301/7189/4254/1051/4282/7305/5588/975/8654/1604/1947/3553/940/7356/7412/4208/3552/3635/3485/80762/8995/8440/6385/596/100/916/3071/6693/22806/10148/5320/3593/942
BP	GO:0030100	regulation of endocytosis	150	0.344074	1.99611	1.497e-05	0.000492678	0.000371098	1737	tags=40%	list=24%	signal=31%	3958/7018/718/187/5788/6850/55646/720/6441/6347/7448/929/71/2213/57126/54209/246/1902/636/2719/5795/2358/1191/4908/6457/26585/10461/3055/7052/6556/140885/2207/811/961/7422/7474/2624/558/25999/4638/10062/20/348/1535/64581/5770/2212/6401/347730/3071/5657/26228/2209/60/567/57817/5054/4193/8862/197
BP	GO:0019221	cytokine-mediated signaling pathway	286	0.297061	1.80509	1.49401e-05	0.000492678	0.000371098	2389	tags=47%	list=32%	signal=33%	3579/7850/83643/1441/5788/6850/6774/8807/841/9759/6352/4321/2950/1435/6347/4317/6354/11006/414062/8519/54209/6775/3627/2185/9353/643/100133941/7852/55504/4067/5048/9470/2690/3303/3667/5795/960/6091/10010/7189/1893/9244/5156/6772/6672/9261/3557/92610/2296/57007/10461/3553/3055/2207/3611/23236/56300/7474/3459/3554/558/3552/1050/10581/9641/8808/4792/7188/4921/8792/10062/8995/25939/1958/8809/5770/643…
BP	GO:0042742	defense response to bacterium	138	0.352961	2.02935	1.52804e-05	0.000500115	0.0003767	2301	tags=53%	list=31%	signal=37%	3934/7018/6590/8993/6850/51316/11096/6441/6280/6279/338339/54209/55576/3148/11005/84868/2358/5580/1051/10417/6364/3553/6556/4069/219972/2207/3240/11117/7779/64170/10133/51297/140686/1535/3929/6403/23005/22914/6693/920/3512/2209/5320/567/57817/5054/3593/3394/6372/130120/26057/284297/79812/338879/6338/57674/728/820/834/2268/2896/3606/90865/3570/4853/7097/7098/7124/7132/8517/306/358/26253
MF	GO:0004252	serine-type endopeptidase activity	62	0.444404	2.29019	1.54494e-05	0.000502869	0.000378773	2353	tags=63%	list=32%	signal=43%	4323/4318/4313/84236/5638/4321/1215/4317/7113/3001/360226/1512/1803/79056/1515/3240/11202/5654/649/23478/5327/196294/2191/4314/3003/3004/5657/716/4319/5328/7177/6768/629/101/1520/4322/5125/2159/64499
BP	GO:0031341	regulation of cell killing	50	0.478814	2.36619	1.56761e-05	0.00050746	0.000382232	2187	tags=66%	list=30%	signal=47%	5788/8807/10125/3684/2213/3821/387837/84868/3075/966/7305/1604/5599/3635/6688/5551/3071/22914/3824/3823/26228/4068/567/3593/135250/912/6372/2885/51571/9390/383/634/146850
BP	GO:0002573	myeloid leukocyte differentiation	134	0.3543	2.02617	1.61377e-05	0.000519562	0.000391347	2459	tags=55%	list=33%	signal=37%	7018/4318/51176/841/135228/1435/11006/54209/55509/1385/4067/5048/9215/8837/2719/7189/4254/1051/7305/975/9644/650/8840/7351/4627/861/7422/3694/2353/2624/10234/677/3398/1050/3635/2625/80762/8792/22985/3930/130733/6688/151176/9935/81501/920/5657/3815/3624/3593/3976/8737/8544/2194/634/1437/1436/2242/3428/3600/90865/4693/4853/5138/7097/7098/7124/1230/1969/6348/29887/863/814/5457
BP	GO:0008360	regulation of cell shape	84	0.393687	2.11574	1.67719e-05	0.000537064	0.00040453	897	tags=33%	list=12%	signal=30%	5880/121512/6347/6354/56990/11151/55843/2185/2335/2245/2534/1902/10435/221061/301/4628/51177/157285/116985/3055/9344/4627/7168/1729/226/25805/7422/5962
BP	GO:0060485	mesenchyme development	212	0.316728	1.88821	1.69117e-05	0.000538628	0.000405708	2256	tags=46%	list=31%	signal=33%	4139/3479/72/10409/187/51176/27250/11096/8828/70/2335/2295/28984/3202/1000/80031/283149/55593/54910/7481/1277/4192/116844/6608/7472/8463/6591/4017/6091/23414/30812/4254/2022/223117/57556/359845/6772/8642/650/2296/26585/1947/3553/183/6909/2316/3911/25805/7422/7474/6943/6659/7043/677/4208/7490/80139/2625/3357/3170/6939/59/152007/90102/57142/653/596/2487/6615/90/58495/10500/4193/6201/8092/6663/657/9…
BP	GO:0000302	response to reactive oxygen species	107	0.376669	2.08901	1.70825e-05	0.000541159	0.000407615	1274	tags=36%	list=17%	signal=31%	5052/10365/4313/8807/51022/6648/5603/2950/2185/2176/2168/5798/3039/2534/4780/1277/10516/2876/1410/5580/5156/4137/6772/5599/140885/3162/7351/10628/7168/7356/847/3240/2353/10276/558/3552/4921/3043/348
BP	GO:0030099	myeloid cell differentiation	244	0.31133	1.87551	1.74533e-05	0.000549964	0.000414247	1678	tags=36%	list=23%	signal=28%	5880/7018/1441/4318/51176/10365/6774/841/338382/55646/135228/1435/11006/54209/4237/2185/221395/93974/55509/3148/3202/1385/4067/7704/5048/4015/3303/9215/8837/2719/5795/5371/2034/7189/4254/7538/1051/7305/975/6772/9644/650/8840/7351/4627/861/2316/7067/7422/3694/2353/2624/10234/677/4208/3398/1050/3635/10006/2625/3707/80762/4792/8792/4212/22985/3930/51621/2313/130733/1028/6688/151176/9935/81501/3071/9…
BP	GO:0050911	detection of chemical stimulus involved in sensory perception of smell	10	-0.699396	-2.72615	1.84426e-05	0.000578063	0.000435412	1389	tags=90%	list=19%	signal=73%	219482/390162/26338/390144/81318/79346/81399/119749/1258
BP	GO:0048246	macrophage chemotaxis	29	0.541245	2.32302	1.95919e-05	0.000610855	0.000460111	2357	tags=76%	list=32%	signal=52%	3958/4313/6352/6441/1435/6347/719/151647/2185/284340/5795/4192/4282/8995/7057/26228/6288/1910/728/1436/6376/6348
BP	GO:0071675	regulation of mononuclear cell migration	91	0.390706	2.12997	1.97634e-05	0.000612975	0.000461709	1653	tags=43%	list=22%	signal=34%	3958/4323/7941/6352/1435/6347/719/6354/969/11151/54209/3627/2185/9353/4067/284340/5795/4192/2358/100532736/1893/4282/975/6364/26585/3676/811/961/23236/7474/11117/8995/7057/57142/653/22914/6693/26228/5054
BP	GO:0042554	superoxide anion generation	31	0.54315	2.39113	2.00102e-05	0.000617174	0.000464871	1359	tags=55%	list=18%	signal=45%	50507/6850/6648/2950/3684/57126/151647/2358/5580/7305/4137/9644/183/285590/10811/1535/64581
BP	GO:0045637	regulation of myeloid cell differentiation	120	0.361555	2.0409	2.01071e-05	0.000617174	0.000464871	1678	tags=41%	list=23%	signal=32%	1441/51176/6774/841/338382/1435/11006/54209/2185/3148/3202/1385/4067/7704/4015/3303/7189/4254/7538/1051/7305/6772/861/2353/2624/10234/677/4208/3398/3635/3707/80762/4792/8792/4212/22985/51621/130733/6688/151176/9935/81501/3071/920/29909/567/3624/3593/3976
BP	GO:0007565	female pregnancy	90	0.39094	2.12857	2.05955e-05	0.000628906	0.000473708	1088	tags=36%	list=15%	signal=31%	5743/3248/4318/4313/2099/7076/2706/81671/5858/2778/2354/2182/84868/1508/2192/3488/1636/2288/5997/3553/10916/7356/811/56977/7422/7056/3490/2353/7043/2201/113/3485
BP	GO:0009612	response to mechanical stimulus	124	0.358298	2.03376	2.09087e-05	0.000635195	0.000478445	1298	tags=34%	list=18%	signal=28%	5743/477/4323/1116/63982/4313/841/84189/27063/3684/56729/3627/2185/7852/5270/1000/2534/2354/9215/7481/1277/4192/3371/2934/2022/10631/2115/2729/6772/5599/3553/10628/2353/3485/4792/4921/8792/7273/4212/25963/3776/7057
MF	GO:0019865	immunoglobulin binding	15	0.658924	2.27735	2.17261e-05	0.000656661	0.000494614	1732	tags=80%	list=23%	signal=61%	3958/5284/931/2213/9214/2208/2207/2217/2212/3512/2209/259
BP	GO:0015718	monocarboxylic acid transport	77	0.412448	2.19019	2.19549e-05	0.000660208	0.000497285	1629	tags=44%	list=22%	signal=35%	5743/2171/6850/2181/225/1381/9194/2168/28965/345274/4067/1374/2182/301/1636/4282/5321/3553/7351/29015/2058/3552/51660/6754/8792/159963/348/7057/28232/22925/151176/255189/116362/5320
BP	GO:0044093	positive regulation of molecular function	438	0.266231	1.65342	2.30382e-05	0.000689285	0.000519187	1418	tags=28%	list=19%	signal=24%	50507/3479/1116/5788/4318/5341/6774/8807/10125/338382/9448/142679/57761/9759/2099/6352/6281/6271/481/6347/1026/6280/3684/6279/7448/482/54209/2185/8477/10297/185/100133941/595/81671/28984/2778/5906/4067/8874/2690/3303/8837/64320/51719/7472/5329/5580/1191/6091/4908/9712/8817/6000/10010/1386/7189/627/1512/5588/9472/6672/650/116985/2296/92154/5599/26585/3553/2208/7052/784/183/9344/85397/56892/7168/39…
BP	GO:0045598	regulation of fat cell differentiation	74	0.407326	2.14699	2.45378e-05	0.000730463	0.000550203	1031	tags=35%	list=14%	signal=31%	83643/5743/11007/57761/6648/1385/7704/6591/23414/7538/1051/6789/9572/5167/650/8840/11221/9580/2308/7422/7474/862/2624/677/3398/1050
BP	GO:0002444	myeloid leukocyte mediated immunity	53	0.458969	2.29145	2.46816e-05	0.00073107	0.00055066	2357	tags=66%	list=32%	signal=45%	5880/718/6850/10125/8832/3684/2213/57126/4067/1636/7305/10417/8773/2624/64170/6688/2212/116449/26228/2209/3815/6372/6338/383/729230/2242/2268/3566/3570/3689/5294/5724/6813/306/6348
BP	GO:0043407	negative regulation of MAP kinase activity	21	0.601023	2.32874	2.51353e-05	0.000740805	0.000557993	1362	tags=62%	list=18%	signal=51%	27250/142679/2950/4067/3301/5795/5997/3553/11221/183/64853/348/5770
BP	GO:0002683	negative regulation of immune system process	323	0.279452	1.70854	2.63892e-05	0.000773909	0.000582928	1669	tags=33%	list=23%	signal=26%	3958/28959/5788/8993/6850/55024/338382/8832/55646/3312/10457/4321/6441/6347/1281/9518/11006/2213/969/5169/54209/246/92747/221395/2335/9353/3821/10225/4332/6664/2778/4067/27202/2534/9470/11005/387837/84868/3956/5795/4192/2876/301/6591/966/100532736/4254/1051/4282/7305/8654/9572/1604/26585/10461/3055/11221/1803/3162/7356/861/23236/7043/2624/81926/55824/10234/558/5802/3398/1050/10769/11117/7105/3635…
BP	GO:0043410	positive regulation of MAPK cascade	249	0.304814	1.83751	2.75062e-05	0.000802693	0.000604608	2441	tags=49%	list=33%	signal=34%	50507/1490/3479/1116/5788/6850/55024/10125/142679/147/10457/9518/2213/54209/246/2185/100133941/55504/5906/4067/1000/2690/1902/6764/284340/84868/54910/8837/5795/2358/960/7498/6091/4908/8817/7189/3489/112464/4282/5156/975/8685/650/57007/3553/9344/3486/23236/7422/7474/85407/3487/7043/148/4208/3552/84231/64170/134/6754/3357/25778/4921/8792/348/7057/59/152007/5770/56005/6688/23005/4504/920/5320/939/60…
BP	GO:0002275	myeloid cell activation involved in immune response	49	0.466312	2.2946	2.94473e-05	0.000855127	0.000644103	2357	tags=67%	list=32%	signal=46%	5880/6850/10125/8832/3684/57126/5169/54209/4067/84868/7305/8773/2207/2624/3929/6688/116449/3815/6338/729230/2242/2268/2896/90865/3566/3689/5294/5724/5777/6813/7124/306/6348
BP	GO:1902107	positive regulation of leukocyte differentiation	106	0.36909	2.04747	2.97938e-05	0.00085679	0.000645355	1678	tags=42%	list=23%	signal=33%	4323/5788/51176/6850/10125/841/1435/11006/54209/1385/7704/4192/301/7189/4254/7305/11221/9580/861/2353/6659/6605/677/558/3398/3635/8808/2625/3707/3142/8792/22985/5896/6688/6666/100/81501/3071/920/60/939/3593/942/3976
BP	GO:1903708	positive regulation of hemopoiesis	106	0.36909	2.04747	2.97938e-05	0.00085679	0.000645355	1678	tags=42%	list=23%	signal=33%	4323/5788/51176/6850/10125/841/1435/11006/54209/1385/7704/4192/301/7189/4254/7305/11221/9580/861/2353/6659/6605/677/558/3398/3635/8808/2625/3707/3142/8792/22985/5896/6688/6666/100/81501/3071/920/60/939/3593/942/3976
BP	GO:0045471	response to ethanol	66	0.4268	2.21866	3.03456e-05	0.00086844	0.000654131	1177	tags=39%	list=16%	signal=33%	3248/841/6648/5579/6279/6354/929/2185/6138/3158/1374/2534/2354/3371/6000/10213/5997/847/1981/2353/7412/1036/113/2625/8792/5999
BP	GO:0002699	positive regulation of immune effector process	131	0.356292	2.03392	3.4691e-05	0.000988025	0.000744205	2216	tags=52%	list=30%	signal=37%	718/5788/6850/8807/10125/3684/51237/924/57126/5169/54209/3821/301/7189/4282/7305/10417/975/9261/1604/3553/2208/940/3329/7474/2624/3554/64170/2625/3142/8809/64581/57142/3929/6688/10865/51744/22914/116449/3824/30009/3823/26228/4068/2209/567/3815/3593/942/135250/912/54537/51571/50943/26057/9390/84861/383/729230/2268/3606/90865/3566/3689/5724/5777/7098/7124
BP	GO:0040008	regulation of growth	289	0.286535	1.74258	3.73239e-05	0.00105289	0.000793063	1583	tags=31%	list=21%	signal=26%	11007/3479/10409/4323/4897/6774/51316/2273/29842/1435/1026/5579/6280/6279/9518/2185/2335/9353/221476/53335/185/7852/2778/1385/5270/5048/80031/2690/3303/2182/1002/4133/2719/694/5795/5371/3371/6608/7472/1410/23414/56981/627/23499/57144/64321/3488/6789/5588/9472/4137/5167/2296/5997/26585/60676/11221/183/9344/3486/6494/861/6909/1981/23236/7422/7474/3490/3487/79960/10276/4208/5802/7490/85004/3300/3142…
BP	GO:0097190	apoptotic signaling pathway	336	0.28172	1.72908	3.73239e-05	0.00105289	0.000793063	1712	tags=33%	list=23%	signal=27%	581/5743/3958/3479/5788/4318/6850/4313/841/57048/309/57761/6648/2950/1026/6280/6279/2213/54209/23612/1396/10595/93974/100133941/3148/9500/2534/51065/3303/3301/51330/8837/4780/5371/2876/960/5329/5580/1191/6591/1386/627/8406/57144/5740/4254/1051/1512/6789/4282/2729/6672/4929/57007/3553/183/940/3162/467/50486/6421/7178/839/7474/2139/4000/54205/665/26471/133746/3552/3090/84231/9641/64170/134/90427/10…
BP	GO:0010811	positive regulation of cell-substrate adhesion	79	0.400776	2.13662	3.77818e-05	0.00106075	0.000798987	1065	tags=37%	list=14%	signal=32%	9448/8631/54453/6281/1435/7448/10562/246/2185/2335/8874/1295/25975/5795/4192/30008/2192/151887/6789/133584/55612/10109/2316/811/3611/7422/51144/6251/11117
MF	GO:1901681	sulfur compound binding	153	0.340702	1.98557	3.85234e-05	0.00107142	0.000807021	2300	tags=50%	list=31%	signal=35%	1490/6402/5788/11096/10457/2950/26/6354/7448/8828/3627/2335/9353/5091/5270/5048/3075/4192/30008/151887/10631/5118/26577/4053/5167/8840/343637/56925/11332/8839/2675/7422/51144/9510/5802/7756/3918/59352/10314/6646/91452/33/2937/348/7057/129804/1305/947/5549/1622/64388/6403/79723/50509/2257/4258/6372/259/6288/63935/9037/222537/79646/27232/29063/340419/11095/7058/3491/4745/5764/84870/64094/170689/284…
BP	GO:0030098	lymphocyte differentiation	241	0.300237	1.80735	3.84464e-05	0.00107142	0.000807021	1689	tags=35%	list=23%	signal=28%	581/914/4323/5788/51176/8993/6850/6774/931/10125/29851/9759/11006/338339/2213/969/6775/2185/3821/7704/11005/56603/8581/3956/5795/4192/301/1386/9452/10461/3553/4783/11221/940/9580/861/3676/2207/6659/6605/7412/677/558/6932/3398/3552/9678/3635/8808/2625/3707/80762/3142/8995/57580/1958/8809/5079/5896/6688/596/441478/6666/9935/100/916/3071/6693/920/925/974/30009/3932/22806/60/939/567/3815/3624/3593/94…
BP	GO:0010810	regulation of cell-substrate adhesion	125	0.352329	2.00318	3.91642e-05	0.00108415	0.000816611	1393	tags=35%	list=19%	signal=29%	5880/4323/9448/8631/54453/4321/6281/1435/7448/10562/71/246/2185/2335/8874/1295/25975/1277/5795/4192/30008/2192/340485/23499/151887/10631/6789/133584/26585/55612/5314/10109/2316/811/3611/7422/51144/6251/11117/57580/7057/6385/5770/90102
BP	GO:0042102	positive regulation of T cell proliferation	55	0.445716	2.24725	3.94211e-05	0.00108619	0.000818144	2176	tags=60%	list=30%	signal=43%	3479/5788/6850/6352/11151/100133941/84868/301/7189/4254/5588/975/1604/1947/3553/940/7412/3552/3485/8440/916/3071/6693/10148/3593/942/912/50943/199/729230/3600/3606/4690
BP	GO:0150076	neuroinflammatory response	51	0.457253	2.26656	3.97934e-05	0.00109137	0.000822047	2240	tags=63%	list=30%	signal=44%	5743/3479/5788/4318/3684/712/4317/54209/4067/9215/747/6608/1191/7305/4137/9572/3553/26471/3459/4314/26228/114/199/728/2896/3606/90865/3689/7097/7098/7124/6376
BP	GO:0060541	respiratory system development	141	0.339216	1.95393	4.03316e-05	0.00110104	0.000829327	1151	tags=31%	list=16%	signal=27%	1490/10409/4323/1116/51176/10365/4321/6441/1281/6664/3158/3202/1385/4015/7481/2719/3371/2034/7472/8817/23414/3488/1636/1512/5156/650/9496/445/6909/57493/1981/3911/7067/4054/7422/3694/7474/6943/7043/7490/1050/9678/9719/9963
BP	GO:0007599	hemostasis	141	0.339039	1.95291	4.08957e-05	0.00111131	0.000837069	2195	tags=48%	list=30%	signal=35%	5341/6850/23452/90139/5638/1281/7448/71/1606/80274/2778/5270/4067/7035/10218/4780/5795/5329/5580/2192/966/2717/5156/5588/5321/10461/79056/4627/2316/2207/3611/7056/558/11117/11093/7391/3170/3043/348/8525/7057/2313/10398/65991/5327/26258/6403/2191/7454/2153/3932/2151/60/5054/5328/23657/6288/5873/7001/284/239/634/8529/83706/3570/3690/5294/5777
BP	GO:0010332	response to gamma radiation	31	0.529089	2.32923	4.2674e-05	0.00115434	0.000869479	1478	tags=55%	list=20%	signal=44%	581/5788/6648/1026/6354/3627/339/5371/2876/1410/3552/2625/7520/55766/598/1958/596
BP	GO:0071695	anatomical structure maturation	114	0.363808	2.03487	4.39366e-05	0.00118309	0.000891136	1478	tags=36%	list=20%	signal=29%	5880/3479/718/10365/4897/4313/29842/26468/1026/712/2185/53335/5798/3202/7704/473/162466/11005/23787/2034/5745/30812/359845/8642/650/4929/26585/55612/7422/7474/2624/558/1080/1050/2625/3745/1901/64581/1028/631/596
MF	GO:0030246	carbohydrate binding	134	0.343728	1.96571	4.54083e-05	0.00121719	0.000916817	1750	tags=41%	list=24%	signal=32%	3958/6402/1116/57452/6441/7448/338339/969/3821/3697/158326/821/1272/63917/387837/1297/3956/4017/5168/653509/2022/57124/5167/3482/2208/4360/226/811/283208/10216/10536/5066/2591/5264/55600/23266/947/64581/22925/6403/11227/6401/54097/10462/22914/3824/10219/3823/5033/50489/29121/140578/259/1463/130120
MF	GO:0019955	cytokine binding	85	0.390478	2.10785	4.84922e-05	0.0012882	0.000970303	2217	tags=55%	list=30%	signal=39%	3579/7850/1441/4317/8828/643/7852/2690/116844/100532736/2022/7538/9244/3557/57007/26585/633/3676/4054/7043/3459/3554/8792/7057/8809/64388/90/3595/920/10663/3815/3593/3454/657/25987/3977/9180/834/729230/1234/1436/8322/10068/3570/3690/9241/7132
BP	GO:0002262	myeloid cell homeostasis	110	0.359442	2.00182	4.84231e-05	0.0012882	0.000970303	1663	tags=39%	list=23%	signal=31%	5880/3579/581/5052/10365/6774/55646/1435/221395/2176/93974/3148/3202/4067/3303/2034/301/4254/7538/6772/10461/3162/7067/7422/4522/2624/677/558/3398/3635/2625/3707/10018/22985/51621/6688/9935/3071/6005/567/3815/57817/3624
BP	GO:0033598	mammary gland epithelial cell proliferation	19	0.601582	2.25085	4.90944e-05	0.0012947	0.0009752	1398	tags=63%	list=19%	signal=51%	581/2099/595/3202/2876/6091/1051/7474/3398/80139/2625/57142
MF	GO:0004896	cytokine receptor activity	52	0.438428	2.18114	4.91741e-05	0.0012947	0.0009752	2164	tags=60%	list=29%	signal=42%	3579/7850/1441/8807/643/7852/2690/960/9244/57007/2675/3459/3554/8808/8809/2859/3595/920/10663/10148/2057/3454/3556/3977/9180/729230/1234/1439/8322/3566/3570
BP	GO:0007160	cell-matrix adhesion	136	0.340302	1.94811	4.99208e-05	0.00130854	0.000985629	1711	tags=39%	list=23%	signal=30%	1490/4323/9448/8631/54453/4321/6281/1435/1281/3684/7448/71/2185/2335/10225/158326/1009/8874/5795/10516/960/30008/340485/23499/8516/10631/10894/26585/55612/5314/9344/3676/3611/7422/3694/7412/11117/11093/10018/26515/7057/6385/1305/947/25992/90102/596/916/5054/50509/3682/7010/5328
BP	GO:1905517	macrophage migration	42	0.482396	2.30062	5.03435e-05	0.00131381	0.000989594	1398	tags=48%	list=19%	signal=39%	3958/4323/4313/6352/6441/1435/6347/719/151647/54209/2185/284340/5795/4192/4282/975/11117/8995/7057/57142
BP	GO:0002429	immune response-activating cell surface receptor signaling pathway	185	0.318594	1.88467	5.5284e-05	0.00143642	0.00108194	1689	tags=36%	list=23%	signal=29%	581/3958/718/5788/6850/931/55024/338382/123920/8631/5579/719/3684/11006/2357/929/2213/9214/54209/92747/3821/4332/4067/27202/2534/57590/5063/5795/2358/5580/7189/7305/975/9572/3055/2208/784/940/9865/2207/961/4208/3635/2625/4792/10062/919/8525/1535/64581/3929/596/100/916/3071/22914/925/974/3824/3932/7294/3823/26228/4068/3539/930/29760
BP	GO:0048771	tissue remodeling	110	0.357784	1.99258	5.74846e-05	0.00148707	0.0011201	2243	tags=51%	list=30%	signal=36%	5880/581/50507/7018/4323/6850/4313/10457/7076/2185/54849/5371/4192/2034/5745/7189/3488/1636/2296/26585/183/861/2316/4054/4208/558/3552/3635/4921/8792/1999/4883/1901/81501/57817/3593/3976/1464/4193/9842/51384/101/823/729230/634/55636/1436/1445/3600/3606/3690/4693/4853/5764/84870/10512
BP	GO:0046629	gamma-delta T cell activation	14	0.640579	2.18448	6.46675e-05	0.00166344	0.00125295	1593	tags=71%	list=22%	signal=56%	5788/51176/6850/3821/9580/6659/6932/919/916/3071
BP	GO:0009725	response to hormone	489	0.255195	1.58957	6.48641e-05	0.00166344	0.00125295	1307	tags=26%	list=18%	signal=23%	5743/477/4323/5788/10365/4313/6774/27250/57761/3312/2099/7076/5563/2706/1281/1026/5579/9518/56729/51237/6775/2185/9353/185/100133941/595/3148/5547/3158/2778/1385/4067/490/4036/7035/249/2690/8648/4015/2354/3303/3301/56603/760/114882/8837/3667/51719/5315/4780/1277/5795/5371/3371/2876/1508/5580/301/6591/2104/2274/1509/10568/3488/1636/7538/1512/5156/5588/2729/6772/9572/6672/5167/2288/3557/4929/10461/…
BP	GO:0031175	neuron projection development	484	0.255663	1.59255	6.71202e-05	0.00171388	0.00129094	2274	tags=41%	list=31%	signal=30%	4139/4897/4313/9448/84189/65059/11122/57689/8507/7431/6280/482/71/8828/2185/2335/9353/4756/26999/53335/7852/5906/1385/547/4067/4036/5048/1009/120114/2534/80031/1902/473/1272/3996/1002/10678/54910/8837/8609/4133/5063/4780/5795/4192/3371/6608/23114/6091/4908/627/23499/100532736/2717/10631/440730/157285/223117/51466/5588/57556/2115/4137/2288/79805/201191/4929/6616/5997/1947/7873/9344/6383/23057/9315…
BP	GO:0032640	tumor necrosis factor production	107	0.359371	1.99307	6.90065e-05	0.00173933	0.0013101	2357	tags=52%	list=32%	signal=36%	3479/914/5788/6850/6774/26137/10457/2950/4317/11006/929/2213/54209/27202/84868/5795/1191/7538/4282/7305/10417/9261/140885/1660/961/7474/3459/558/3552/64170/10564/7057/1535/64581/3929/2212/10865/6693/2209/5004/3593/8737/50943/284/1536/729230/90865/5724/5777/7097/7098/7291/6376/4023/1139/6348
BP	GO:0032680	regulation of tumor necrosis factor production	107	0.359371	1.99307	6.90065e-05	0.00173933	0.0013101	2357	tags=52%	list=32%	signal=36%	3479/914/5788/6850/6774/26137/10457/2950/4317/11006/929/2213/54209/27202/84868/5795/1191/7538/4282/7305/10417/9261/140885/1660/961/7474/3459/558/3552/64170/10564/7057/1535/64581/3929/2212/10865/6693/2209/5004/3593/8737/50943/284/1536/729230/90865/5724/5777/7097/7098/7291/6376/4023/1139/6348
BP	GO:0043491	phosphatidylinositol 3-kinase/protein kinase B signal transduction	169	0.321571	1.88463	6.95848e-05	0.00173933	0.0013101	2424	tags=51%	list=33%	signal=35%	50507/3479/1116/6774/55024/10125/6352/9518/54209/2185/23612/2335/5270/4036/25862/4015/114882/3667/5795/2876/1634/7498/112464/3488/2022/5156/8395/5288/10461/5314/183/940/847/79630/3611/7422/677/80243/558/23239/2625/4921/5287/7057/5770/56005/219699/55704/57142/151176/6403/4314/3815/930/10870/7010/1649/4915/25948/9037/51384/284/101/634/1436/2268/3606/4693/5008/5294/5777/9723/10507/10253/7124/7291/72…
BP	GO:0001558	regulation of cell growth	194	0.304853	1.80796	6.94456e-05	0.00173933	0.0013101	1023	tags=28%	list=14%	signal=25%	11007/3479/4323/4897/2273/1026/6280/6279/2185/2335/9353/221476/53335/185/7852/5270/5048/80031/3303/2182/1002/4133/694/5795/5371/3371/1410/56981/627/23499/57144/64321/3488/5588/9472/4137/5167/5997/26585/60676/183/9344/3486/6494/1981/7422/7474/3490/3487/79960/10276/5802/7490/85004
MF	GO:0042803	protein homodimerization activity	360	0.273573	1.6862	6.93763e-05	0.00173933	0.0013101	2248	tags=42%	list=30%	signal=31%	581/5743/5341/6774/8553/1063/11122/225/6352/6281/6271/1435/26/3326/9518/79953/11151/9353/3001/53335/7704/2122/4209/2690/79717/10404/5049/51201/55553/1297/5315/5371/10516/30008/1410/7498/5745/1386/2717/2022/1051/6789/7305/5156/6772/6672/5167/387758/26585/1803/316/6556/3320/3162/467/27101/2958/7351/6421/4627/140576/7168/51100/861/847/2316/2207/11332/5660/29841/7422/57026/2058/665/26011/1050/2992/20…
BP	GO:0032543	mitochondrial translation	51	-0.288585	-2.61234	6.99113e-05	0.00173952	0.00131025	4428	tags=94%	list=60%	signal=38%	122704/64979/9553/84300/116541/51263/64951/51264/63931/64968/10128/55052/54998/80222/26589/29074/28977/64975/84545/64928/116540/51258/64981/64960/219927/28958/63875/708/118487/2617/29088/64965/22868/65080/55157/55699/51116/26995/79828/64969/64949/51654/54516/64978/57505/5188/11222/219402
BP	GO:1904035	regulation of epithelial cell apoptotic process	26	0.547136	2.27995	7.01799e-05	0.00173952	0.00131025	1478	tags=58%	list=20%	signal=46%	581/2099/5563/8837/7481/4192/2934/7538/6789/5314/3162/26471/677/22925/596
BP	GO:0000959	mitochondrial RNA metabolic process	25	-0.423235	-2.75587	7.08157e-05	0.00174797	0.00131661	3951	tags=96%	list=54%	signal=45%	81892/10128/3028/80222/87178/25885/201626/708/2617/80324/9238/55683/9692/130916/55157/64216/90806/79675/79828/84172/51654/57505/5442/56652
BP	GO:0051897	positive regulation of phosphatidylinositol 3-kinase/protein kinase B signal transduction	105	0.362307	2.00673	7.1144e-05	0.00174878	0.00131723	2424	tags=57%	list=33%	signal=39%	50507/3479/1116/6352/9518/54209/2185/2335/114882/3667/5795/2876/1634/3488/2022/5156/10461/183/940/847/7422/558/2625/4921/7057/56005/219699/55704/57142/151176/6403/3815/930/10870/7010/4915/9037/51384/284/101/1436/2268/3606/4693/5008/5294/5777/9723/10507/10253/7124/7295/6376/55273/83667/6348/4916/5159/56034/9378
BP	GO:0071677	positive regulation of mononuclear cell migration	60	0.427528	2.19034	7.2039e-05	0.00176347	0.00132829	2375	tags=62%	list=32%	signal=42%	3958/4323/7941/6352/1435/719/6354/11151/54209/3627/2185/284340/5795/4192/2358/6364/3676/811/961/7474/8995/7057/57142/6693/5054/199/101/728/729230/1436/3690/83700/7124/6376/1230/6348/58494
BP	GO:0032946	positive regulation of mononuclear cell proliferation	75	0.403353	2.12955	7.37695e-05	0.0017984	0.0013546	2176	tags=55%	list=30%	signal=39%	3479/5788/6850/6352/1435/1026/11151/100133941/84868/301/7189/4254/4282/5588/975/1604/1947/3553/940/7412/4208/3552/3485/8440/598/596/100/916/3071/6693/10148/3593/942/912/57162/50943/199/729230/3600/3606/4690
BP	GO:0097435	supramolecular fiber organization	459	0.258989	1.61038	7.61445e-05	0.00184869	0.00139248	1659	tags=31%	list=23%	signal=25%	5880/581/1490/1674/7018/10409/5341/9535/3312/27063/6281/7431/1281/3326/71/70/11151/54209/246/2185/8496/9353/8477/10297/26999/28984/5048/5108/8874/1902/84952/4015/3303/81553/10435/8837/4133/221061/5063/1277/1278/10516/2876/2934/30008/1410/5580/1191/4017/129446/2006/146057/3936/51466/5156/4053/4137/359845/56776/120/2288/201191/100506658/116985/2296/65108/26585/3055/871/23363/10109/4239/7168/3925/17…
BP	GO:0002822	regulation of adaptive immune response based on somatic recombination of immune receptors built from immunoglobulin superfamily domains	110	0.353003	1.96596	7.68354e-05	0.00185785	0.00139938	2216	tags=52%	list=30%	signal=37%	718/5788/11006/2213/969/924/54209/3821/84868/3956/301/7189/5588/975/5321/1604/3553/2208/940/6556/3329/3554/4208/64170/2625/80762/3142/8995/8809/64581/10865/100/3071/6693/920/7454/3824/30009/2209/567/3593/135250/912/54537/51571/50943/9390/84861/383/729230/634/3606/90865/3566/5585/5777/7124
BP	GO:0070482	response to oxygen levels	188	0.317383	1.88129	7.84006e-05	0.00188035	0.00141632	1711	tags=37%	list=23%	signal=29%	5743/4323/4313/2982/6648/5230/1026/54209/2185/2168/100133941/7852/28984/523/1374/1902/8837/4780/1277/5371/2034/1410/2277/4017/1386/5740/6547/1636/2022/10631/56776/5664/650/4929/1803/7351/2308/847/7422/5789/2353/6659/4000/7043/7412/665/677/3552/134/4921/7391/3776/7057/1958/10869/5770/57142/5327/596/79723/6326/100/221074/4504/3777/3624/3976/7010/4193/5328
BP	GO:0072001	renal system development	204	0.310805	1.84677	7.84006e-05	0.00188035	0.00141632	1486	tags=32%	list=20%	signal=27%	3579/581/3248/10409/4318/23213/1063/9353/6664/185/100133941/55959/3158/4036/7704/9500/56603/8837/7481/1286/2719/6608/2028/1282/30812/8516/64321/1636/1512/9244/5156/6772/8642/650/2296/26585/5314/183/445/847/3911/79630/3611/7422/7474/6943/4072/6659/4774/9510/4208/7490/2625/11064/10018/4038/26146/59/1958/6385/947/1028/11174/8452/596/26258
BP	GO:0002285	lymphocyte activation involved in immune response	115	0.353488	1.97919	7.91119e-05	0.00188975	0.00142341	2301	tags=51%	list=31%	signal=36%	3958/5788/51176/8993/6774/29851/338339/2213/969/11151/54209/6775/2185/80031/84868/3956/4192/301/9452/3936/7305/975/940/6556/3329/2207/9678/2625/80762/3142/54518/8995/8809/51744/9156/100/4818/3071/6693/30009/3593/942/3394/5450/930/54537/5873/50943/23228/634/3606/3566/3570/4853/5361/64218/3683/8741/26253
BP	GO:0030879	mammary gland development	75	0.401926	2.12202	7.9578e-05	0.00189325	0.00142605	1243	tags=39%	list=17%	signal=32%	581/51176/2099/1435/595/3202/1385/8648/5371/2876/6608/7472/7498/6091/3488/1051/6909/7422/7474/4830/7043/1036/3398/80139/2625/8792/10018/1999/3664
BP	GO:0002062	chondrocyte differentiation	73	0.404819	2.1336	8.05739e-05	0.00190928	0.00143812	1003	tags=36%	list=14%	signal=31%	1490/23213/1281/55959/7704/4209/55553/4192/6591/4017/8817/5745/1386/2202/1893/359845/650/26585/8840/871/85301/861/129642/7045/4054/4208
BP	GO:0051896	regulation of phosphatidylinositol 3-kinase/protein kinase B signal transduction	146	0.333602	1.92821	8.08992e-05	0.00190935	0.00143817	2424	tags=53%	list=33%	signal=36%	50507/3479/1116/55024/10125/6352/9518/54209/2185/23612/2335/5270/25862/4015/114882/3667/5795/2876/1634/7498/112464/3488/2022/5156/8395/10461/5314/183/940/847/7422/558/23239/2625/4921/7057/5770/56005/219699/55704/57142/151176/6403/4314/3815/930/10870/7010/1649/4915/9037/51384/284/101/634/1436/2268/3606/4693/5008/5294/5777/9723/10507/10253/7124/7291/7295/6376/55273/83667/6348/4916/1263/5159/56034/9…
BP	GO:1901136	carbohydrate derivative catabolic process	110	0.351933	1.96	8.25268e-05	0.00194003	0.00146128	1081	tags=30%	list=15%	signal=26%	3479/2597/3939/1116/27159/8993/6774/26137/9759/4321/5230/5563/55576/6996/957/3425/5315/960/5580/7498/2717/8654/2817/10894/7351/226/9611/26471/216/5223/3251/8671/4245
BP	GO:0032633	interleukin-4 production	21	0.575785	2.23095	8.73089e-05	0.00201544	0.00151808	1872	tags=71%	list=25%	signal=53%	51176/6850/84868/1051/5588/940/7356/2207/2625/80762/916/942/1649/3556/50943
BP	GO:0032673	regulation of interleukin-4 production	21	0.575785	2.23095	8.73089e-05	0.00201544	0.00151808	1872	tags=71%	list=25%	signal=53%	51176/6850/84868/1051/5588/940/7356/2207/2625/80762/916/942/1649/3556/50943
BP	GO:0070555	response to interleukin-1	65	0.414797	2.15262	8.76198e-05	0.00201544	0.00151808	1307	tags=38%	list=18%	signal=32%	7850/1116/10365/4313/9759/27063/6352/5603/6347/2690/10010/7189/5740/2729/9572/3557/3553/140885/961/23236/3554/8808/4792/8792/1958
BP	GO:2000377	regulation of reactive oxygen species metabolic process	79	0.389888	2.07858	8.63705e-05	0.00201544	0.00151808	1820	tags=46%	list=25%	signal=35%	5880/6850/225/6648/2950/1026/3684/57126/2185/185/5547/2534/8837/4780/10516/2358/1410/5580/7498/7305/4137/183/140885/2308/3240/10811/7057/1535/64581/596/4314/4504/2885/1994/8737/5873
MF	GO:0008201	heparin binding	108	0.362269	2.01519	8.71678e-05	0.00201544	0.00151808	2624	tags=58%	list=36%	signal=38%	1490/6402/5788/11096/10457/26/6354/7448/8828/3627/2335/9353/5270/5048/3075/4192/30008/151887/10631/5118/26577/4053/8840/343637/56925/8839/7422/51144/9510/5802/7756/3918/59352/348/7057/129804/1305/5549/64388/6403/50509/2257/6372/6288/340419/11095/7058/3491/4745/5764/84870/64094/170689/284654/4023/9388/200879/1842/6159/6146/11167/9289/2264
BP	GO:0042113	B cell activation	144	0.333104	1.92229	8.77758e-05	0.00201544	0.00151808	1689	tags=38%	list=23%	signal=29%	581/718/4323/5788/51176/6850/931/55024/10125/841/9759/1026/5579/2213/51237/2185/4332/643/4067/3956/5795/5580/9452/4282/7305/975/940/3329/3676/7412/677/4208/3398/9678/3635/80762/5079/5896/6688/596/9156/100/3071/974/30009/22806/939/3815/3624/942/3394/5450/930/29760
BP	GO:0008015	blood circulation	292	0.280004	1.70373	8.85531e-05	0.00202544	0.00152561	2411	tags=46%	list=33%	signal=32%	3579/5743/477/1674/10365/4313/2982/147/3762/1215/6271/481/6648/719/482/70/3627/9353/6445/185/7852/5547/490/1278/5795/2034/2876/2934/2028/10052/2006/6547/1636/2022/10631/55800/6332/2729/8654/6772/120/100506658/2296/5997/183/7873/3320/5742/7168/6909/3676/2316/4544/776/10266/7067/7422/783/10539/148/23704/143872/3398/11117/7139/134/3357/5999/7273/4607/3043/348/27131/4883/59/57644/6328/2313/5770/1573/…
BP	GO:0071706	tumor necrosis factor superfamily cytokine production	111	0.35559	1.97993	8.94466e-05	0.0020302	0.0015292	2357	tags=52%	list=32%	signal=36%	3479/914/5788/6850/6774/26137/10457/2950/4317/11006/929/2213/54209/27202/84868/5795/1191/7538/4282/7305/10417/9261/140885/1660/961/7474/3459/558/3552/64170/10564/7057/1535/64581/3929/2212/10865/6693/2209/5004/3593/942/8737/50943/284/1536/101/729230/90865/5724/5777/7097/7098/7291/6376/4023/1139/6348
BP	GO:1903555	regulation of tumor necrosis factor superfamily cytokine production	111	0.35559	1.97993	8.94466e-05	0.0020302	0.0015292	2357	tags=52%	list=32%	signal=36%	3479/914/5788/6850/6774/26137/10457/2950/4317/11006/929/2213/54209/27202/84868/5795/1191/7538/4282/7305/10417/9261/140885/1660/961/7474/3459/558/3552/64170/10564/7057/1535/64581/3929/2212/10865/6693/2209/5004/3593/942/8737/50943/284/1536/101/729230/90865/5724/5777/7097/7098/7291/6376/4023/1139/6348
CC	GO:0030667	secretory granule membrane	164	0.313713	1.83594	8.98606e-05	0.00203181	0.00153041	860	tags=26%	list=12%	signal=23%	3579/3958/2171/6402/5788/5284/963/81619/10184/135228/719/3684/11010/2813/2357/929/338339/57126/79895/5547/5906/547/5273/5795/2358/960/23114/5329/966/5787/7305/1604/8773/6616/3482/8655/6556/140885/1729/2207/5660/961
BP	GO:1904019	epithelial cell apoptotic process	41	0.474108	2.25294	9.36025e-05	0.00210837	0.00158808	1478	tags=49%	list=20%	signal=39%	581/51176/2099/5563/8837/7481/4192/2934/1386/7538/6789/5314/3162/839/26471/677/598/746/22925/596
BP	GO:0043085	positive regulation of catalytic activity	272	0.285174	1.72941	9.41933e-05	0.00211364	0.00159205	1394	tags=29%	list=19%	signal=24%	50507/3479/1116/5788/5341/6774/10125/9448/142679/57761/2099/6352/6281/6271/1026/3684/54209/2185/8477/10297/185/100133941/595/28984/2778/5906/4067/8874/2690/3303/51719/5580/6091/4908/9712/8817/6000/10010/7189/1512/650/116985/92154/5599/3553/2208/7052/183/9344/85397/56892/5660/776/1660/7474/23531/894/5899/6004/10276/4208/143872/6251/10006/7520/25778/4921/8792/57148/10062/348/57186/4883/7057/8543/57…
BP	GO:0043567	regulation of insulin-like growth factor receptor signaling pathway	13	0.668693	2.21357	9.59676e-05	0.00214533	0.00161591	1559	tags=77%	list=21%	signal=61%	3479/8483/3489/3488/650/3486/3487/3485/653/2691
BP	GO:0045123	cellular extravasation	48	0.447233	2.19024	9.65678e-05	0.00215063	0.00161991	2479	tags=69%	list=34%	signal=46%	6402/6347/57126/10164/4192/9435/50512/10894/140885/3676/961/23236/7412/3554/6403/6401/6693/5657/101/729230/3689/83700/5294/5724/7070/7124/6376/3683/83483/58494/683/3383/2650
BP	GO:0002819	regulation of adaptive immune response	121	0.345332	1.95256	9.69336e-05	0.00215069	0.00161995	2216	tags=50%	list=30%	signal=36%	718/5788/8631/11006/2213/969/924/54209/246/3821/84868/3956/301/7189/5588/975/5321/1604/3553/2208/11221/940/6556/3329/3554/4208/113/64170/2625/80762/3142/8995/8809/64581/10865/100/3071/6693/920/7454/3824/30009/2209/567/3593/135250/912/54537/51571/50943/9390/84861/383/729230/634/3606/90865/3566/5585/5777/7124
BP	GO:0006399	tRNA metabolic process	71	-0.231554	-2.47463	9.9131e-05	0.00219124	0.0016505	2209	tags=59%	list=30%	signal=42%	79074/64172/9330/92935/129450/9692/10056/1615/81627/116461/55157/55699/10557/1787/221078/9328/9329/26995/81605/23404/79828/26610/283742/9836/56986/51605/92675/51654/27304/144233/90353/27037/84520/25917/57505/134637/5188/8518/10775/83707/55039/7407
BP	GO:0002253	activation of immune response	316	0.274514	1.67729	9.98336e-05	0.00219857	0.00165601	2226	tags=41%	list=30%	signal=30%	581/3958/718/5788/6850/931/55024/338382/123920/8631/3312/2099/720/713/5579/719/6280/3684/712/6279/285852/11006/2357/929/2213/729/9214/54209/92747/3821/4332/28984/4067/27202/2534/3303/84868/3075/57590/5063/5795/2358/5580/1191/7189/966/7305/975/9572/9261/1604/92610/5599/3553/3055/2208/784/940/3320/3329/6421/9865/81622/2207/730/961/839/81926/4208/5802/7105/3635/9641/2625/7520/4792/10062/919/8525/153…
BP	GO:0045639	positive regulation of myeloid cell differentiation	60	0.41984	2.15095	0.000103665	0.00227449	0.00171321	1678	tags=47%	list=23%	signal=36%	51176/6774/841/338382/1435/54209/3148/3202/1385/3303/7189/4254/7305/6772/861/2353/2624/677/3398/3635/8792/22985/81501/3071/920/3624/3593/3976
MF	GO:0001216	DNA-binding transcription activator activity	202	0.308143	1.82915	0.00010445	0.00227486	0.00171348	1815	tags=38%	list=25%	signal=30%	51176/6774/26298/29842/55810/11317/2099/6664/2295/3202/1385/7704/2122/4209/2354/79800/8609/4780/2034/4807/2104/1386/3215/64321/171017/1051/2115/9970/1052/2296/4929/4603/22809/467/861/2308/29841/1628/2353/6943/6659/2004/4774/2624/4208/7490/1050/2625/5396/10062/4212/1999/7391/3664/6939/51621/1958/2313/5079/90993/6688/3234/6666/58495/5326/9935/30009/22806/3131/1649/7728/343472/4760/63974/4086/8092/6…
BP	GO:0048871	multicellular organismal-level homeostasis	447	0.257053	1.59661	0.000104346	0.00227486	0.00171348	1663	tags=30%	list=23%	signal=25%	5880/3579/581/5743/50507/3934/1490/2171/5052/7018/10365/6850/6774/51316/2327/55646/12/11096/6441/6648/5563/1435/1281/9518/482/71/11151/4237/2185/221395/4756/2176/93974/7852/3148/5547/2778/3202/4067/1000/54849/249/3303/2034/2876/2326/6608/9462/301/2104/5745/7189/4254/7538/1051/1512/4282/6772/9572/100506658/2296/22884/5599/9476/10461/3553/26580/6556/3162/50486/7351/2308/1981/7067/4054/7422/3694/655…
MF	GO:0004930	G protein-coupled receptor activity	150	0.32599	1.8912	0.000105685	0.00229333	0.00172739	2200	tags=46%	list=30%	signal=33%	3579/5157/3248/187/10149/387509/147/2099/11318/53637/719/2015/2357/221395/8477/643/185/7852/1131/27202/1902/9934/2831/1241/2358/6608/5745/57211/57007/10203/4544/10266/148/166647/134/6754/3357/10314/2863/128674/4883/11245/23266/1901/2859/23596/23432/50834/10663/29909/2151/84109/27199/143503/115330/83941/680/4988/26996/2740/6865/1910/5737/728/729230/1234/8322/5724/8698
BP	GO:0002886	regulation of myeloid leukocyte mediated immunity	32	0.506389	2.26186	0.000107163	0.00230012	0.00173251	2212	tags=69%	list=30%	signal=48%	5880/718/6850/8832/3684/2213/57126/4067/7305/2624/6688/26228/2209/6372/383/729230/2242/2268/3566/3689/5724/6813
BP	GO:0009743	response to carbohydrate	108	0.360106	2.00315	0.000106538	0.00230012	0.00173251	1437	tags=36%	list=19%	signal=30%	5743/50507/7447/26137/1215/6648/5563/5603/5579/54209/2185/5798/3158/4067/8609/1277/2876/9462/1636/2729/9572/3553/10203/7351/10628/847/23236/6659/677/1080/3552/7391/2752/3170/3745/7057/1958/64581/387597
BP	GO:0050817	coagulation	139	0.334529	1.92587	0.00010703	0.00230012	0.00173251	2195	tags=48%	list=30%	signal=35%	5341/6850/23452/5638/1281/7448/71/1606/80274/2778/5270/4067/7035/10218/4780/5795/5329/5580/2192/966/2717/5156/5588/5321/10461/79056/4627/2316/2207/3611/7056/558/11117/11093/7391/3170/3043/348/8525/7057/10398/65991/5327/26258/6403/2191/7454/2153/3932/2151/60/5054/5328/23657/6288/5873/222537/7001/284/239/634/8529/83706/3570/3690/5294/5777
BP	GO:0002455	humoral immune response mediated by circulating immunoglobulin	32	0.505781	2.25914	0.000110837	0.00237039	0.00178544	836	tags=44%	list=11%	signal=39%	718/5788/720/713/712/2213/729/9214/54209/1191/975/1604/2208/730
MF	GO:0005178	integrin binding	108	0.359387	1.99916	0.000113375	0.00241594	0.00181975	1093	tags=32%	list=15%	signal=28%	1490/3479/4323/6850/11096/10457/1281/3684/7448/57126/2335/4067/25975/3371/10516/2192/3936/8516/975/3553/8840/2208/55612/4627/3676/3911/811/8839/3611/7045/3694/7412/8745/11117/11093
BP	GO:0001822	kidney development	195	0.310712	1.84413	0.000114498	0.00243114	0.00183119	1486	tags=32%	list=20%	signal=26%	3579/581/3248/10409/4318/23213/1063/9353/6664/185/100133941/55959/3158/4036/7704/9500/56603/8837/7481/1286/2719/6608/2028/30812/8516/64321/1636/1512/9244/5156/6772/8642/650/2296/26585/5314/183/445/847/3911/3611/7422/7474/6943/4072/6659/9510/4208/7490/2625/11064/10018/4038/26146/59/1958/6385/947/1028/11174/8452/596/26258
BP	GO:0007596	blood coagulation	138	0.332329	1.91073	0.000114958	0.00243217	0.00183197	2195	tags=48%	list=30%	signal=34%	5341/6850/23452/5638/1281/7448/71/1606/80274/2778/5270/4067/7035/10218/4780/5795/5329/5580/2192/966/2717/5156/5588/5321/10461/79056/4627/2316/2207/3611/7056/558/11117/11093/7391/3170/3043/348/8525/7057/10398/65991/5327/26258/6403/2191/7454/2153/3932/2151/60/5054/5328/23657/6288/5873/7001/284/239/634/8529/83706/3570/3690/5294/5777
BP	GO:0097530	granulocyte migration	94	0.368368	2.01657	0.00011624	0.00245056	0.00184582	1613	tags=38%	list=22%	signal=30%	5880/3579/3958/1441/6850/6352/1435/6347/719/6280/6279/6354/2813/57126/3627/9353/27202/284340/5795/4192/301/3553/1803/2207/1800/7422/3554/3552/8995/57580/7057/57142/3929/6367/3071/5657
BP	GO:0046942	carboxylic acid transport	148	0.330025	1.91211	0.000116999	0.00245781	0.00185129	1735	tags=39%	list=24%	signal=30%	5743/477/2171/6850/2181/225/1381/9194/2168/10560/28965/345274/4067/1374/4036/2182/115019/301/1636/4282/80727/92745/5321/5997/3553/6556/7351/29015/5660/6558/2058/3552/51660/134/6754/9963/8792/5999/159963/3776/6506/348/7057/4735/28232/22925/151176/8864/8501/255189/116362/2350/5320/56301/23657/4915/1109
BP	GO:0044703	multi-organism reproductive process	101	0.360199	1.98154	0.000117825	0.00246641	0.00185776	1088	tags=33%	list=15%	signal=28%	5743/3248/4318/4313/2099/7076/2706/81671/5858/2778/5270/2354/2182/84868/1508/2192/3488/1636/2288/5997/3553/10916/7356/811/56977/7422/7056/3490/2353/7043/2201/113/3485
MF	GO:0001228	DNA-binding transcription activator activity RNA polymerase II-specific	198	0.310802	1.84449	0.000119152	0.0024854	0.00187207	1815	tags=38%	list=25%	signal=30%	51176/6774/26298/29842/55810/11317/2099/6664/2295/3202/1385/7704/2122/4209/2354/79800/8609/4780/2034/4807/2104/1386/3215/64321/171017/1051/2115/9970/1052/2296/4929/4603/22809/467/861/2308/29841/1628/2353/6943/6659/2004/4774/2624/4208/7490/1050/2625/5396/10062/4212/1999/7391/3664/6939/51621/1958/2313/5079/90993/3234/6666/58495/5326/9935/30009/22806/3131/1649/7728/343472/4760/63974/4086/8092/6663
BP	GO:1902105	regulation of leukocyte differentiation	187	0.312161	1.84931	0.0001213	0.00251503	0.00189439	1678	tags=36%	list=23%	signal=28%	914/28959/4323/5788/51176/8993/6850/10125/841/1435/11006/2213/969/54209/1385/4067/7704/11005/56603/3956/4192/301/7189/4254/1051/7305/11221/940/9580/861/2353/6659/6605/2624/10234/677/558/6932/3398/3635/8808/2625/3707/80762/3142/8792/8995/22985/130733/5896/6688/151176/441478/6666/9935/100/81501/3071/920/30009/22806/60/939/3624/3593/942/3976
BP	GO:0048732	gland development	222	0.295608	1.76966	0.000121421	0.00251503	0.00189439	1559	tags=32%	list=21%	signal=26%	581/51176/4313/23213/29842/2099/6648/1435/7448/1396/595/55959/3158/3202/1385/5270/1374/8648/8837/7481/5371/4192/3371/2876/6608/7472/6591/7498/6091/1386/3488/1051/5156/2288/650/2296/3482/7052/7351/445/6909/5660/3911/7067/7422/7474/27122/6943/4830/7043/2624/1036/7490/3398/1050/80139/2625/3142/8792/10018/1999/3664/8543/1028/57142/5896/8452/596/2487/9935/100/2691
BP	GO:0070098	chemokine-mediated signaling pathway	39	0.471933	2.21392	0.000122058	0.00251942	0.00189769	701	tags=38%	list=10%	signal=35%	3579/6352/6347/6354/414062/54209/3627/2185/9353/643/7852/4067/6091/2296/57007
BP	GO:0042542	response to hydrogen peroxide	59	0.42027	2.14155	0.00012373	0.00253798	0.00191167	1013	tags=37%	list=14%	signal=32%	10365/4313/8807/6648/5603/2185/2168/3039/2534/4780/1277/2876/1410/5580/6772/140885/3162/10628/847/3240/10276/558
BP	GO:0051336	regulation of hydrolase activity	179	0.311117	1.83548	0.000123814	0.00253798	0.00191167	1207	tags=30%	list=16%	signal=25%	2597/5341/121512/6774/10125/9448/6352/6281/7076/7448/8477/3001/10297/93974/185/5906/5270/4067/5273/2245/8874/3303/5580/4908/9712/6000/10010/1893/1512/1476/23637/650/116985/92154/5997/7052/871/85397/3925/5684/5660/7078/5962/6004/10276/5269/4208/143872/6251/10565/57148/10062/26086
BP	GO:0006801	superoxide metabolic process	51	0.437547	2.16888	0.000127409	0.00260267	0.00196039	1359	tags=43%	list=18%	signal=35%	50507/5052/6850/6648/2950/3684/57126/151647/2176/4780/10516/2358/5580/7305/4137/9644/183/285590/10811/57580/1535/64581
BP	GO:0006953	acute-phase response	26	0.535274	2.23051	0.000128346	0.00261278	0.00196801	2360	tags=77%	list=32%	signal=52%	5743/12/2335/1051/3557/3553/445/3240/3552/8792/3929/5004/9332/197/130120/6288/1910/3570/7124/2
BP	GO:0006026	aminoglycan catabolic process	14	0.625683	2.13368	0.000131349	0.00266477	0.00200717	664	tags=50%	list=9%	signal=46%	1116/27159/8993/55576/3425/960/10894
BP	GO:0051216	cartilage development	122	0.35002	1.98397	0.00013558	0.00274122	0.00206476	1128	tags=33%	list=15%	signal=28%	1490/1116/23213/7076/1281/55959/3202/7704/4209/2690/55553/7481/1277/4192/960/6591/4017/8817/5745/1386/2202/1893/359845/650/26585/8840/871/85301/633/861/7067/129642/7045/4054/7474/649/4774/4208/2625/5396
BP	GO:0090322	regulation of superoxide metabolic process	22	0.567455	2.25338	0.00013751	0.00274279	0.00206594	734	tags=50%	list=10%	signal=45%	6850/2950/3684/57126/4780/10516/2358/5580/7305/4137/183
BP	GO:0032309	icosanoid secretion	22	0.567073	2.25186	0.00013751	0.00274279	0.00206594	1629	tags=64%	list=22%	signal=50%	5743/6850/2182/301/1636/4282/5321/3553/3552/6754/8792/22925/255189/5320
BP	GO:0099175	regulation of postsynapse organization	77	0.39214	2.08235	0.000136313	0.00274279	0.00206594	1562	tags=42%	list=21%	signal=33%	4139/4897/9456/79953/8828/2213/2185/26999/547/5048/1000/51104/2534/54910/5063/1627/7474/9040/5789/55737/81926/5802/23613/7779/10611/4038/26052/348/5770/57142/27067/347730
BP	GO:0015849	organic acid transport	149	0.327321	1.89789	0.000137445	0.00274279	0.00206594	1735	tags=38%	list=24%	signal=30%	5743/477/2171/6850/2181/225/1381/9194/2168/10560/28965/345274/4067/1374/4036/2182/115019/301/1636/4282/80727/92745/5321/5997/3553/6556/7351/29015/5660/6558/2058/3552/51660/134/6754/9963/8792/5999/159963/3776/6506/348/7057/4735/28232/22925/151176/8864/8501/255189/116362/2350/5320/56301/23657/4915/1109
BP	GO:0030324	lung development	126	0.340062	1.93512	0.000142273	0.00281882	0.00212321	1151	tags=32%	list=16%	signal=27%	1490/4323/1116/10365/4321/6441/1281/6664/3158/3202/1385/4015/7481/2719/3371/2034/7472/8817/23414/3488/1636/1512/5156/650/9496/6909/57493/1981/3911/7067/4054/7422/3694/7474/6943/7043/1050/9678/9719/9963
BP	GO:0001666	response to hypoxia	166	0.322038	1.88652	0.000141989	0.00281882	0.00212321	1711	tags=38%	list=23%	signal=30%	5743/4323/4313/6648/5230/54209/2185/2168/100133941/7852/28984/1374/8837/4780/5371/2034/1410/2277/4017/1386/5740/6547/1636/2022/10631/56776/5664/650/4929/1803/7351/847/7422/5789/2353/6659/4000/7043/7412/665/677/3552/134/4921/7391/3776/7057/1958/10869/5770/57142/5327/596/79723/6326/100/4504/3777/3624/3976/7010/4193/5328
BP	GO:0048144	fibroblast proliferation	65	0.407338	2.11392	0.00014345	0.00283267	0.00213363	1421	tags=40%	list=19%	signal=33%	581/3479/5052/2099/6648/2950/1281/1026/2335/5371/2876/7472/2277/2192/2495/4282/5156/57124/183/1602/1660/7474/26471/4921/10728/1163
BP	GO:0043129	surfactant homeostasis	11	0.681973	2.13739	0.000147022	0.00289354	0.00217949	1214	tags=73%	list=16%	signal=61%	6441/221395/2034/1512/9476/7422/3694/51297
BP	GO:0036293	response to decreased oxygen levels	174	0.309381	1.82121	0.000148953	0.00292185	0.00220081	1711	tags=37%	list=23%	signal=29%	5743/4323/4313/6648/5230/54209/2185/2168/100133941/7852/28984/1374/8837/4780/5371/2034/1410/2277/4017/1386/5740/6547/1636/2022/10631/56776/5664/650/4929/1803/7351/847/7422/5789/2353/6659/4000/7043/7412/665/677/3552/134/4921/7391/3776/7057/1958/10869/5770/57142/5327/596/79723/6326/100/221074/4504/3777/3624/3976/7010/4193/5328
BP	GO:0042129	regulation of T cell proliferation	99	0.351817	1.93053	0.000150461	0.00294168	0.00221575	2195	tags=48%	list=30%	signal=35%	5880/3958/3479/5788/6850/10457/6352/6441/11006/11151/100133941/84868/301/7189/4254/1051/5588/975/8654/1604/1947/3553/940/7356/7412/3552/3485/80762/8995/8440/6385/916/3071/6693/10148/5320/3593/942/912/57162/50943/199/383/729230/3600/3606/4690/5777
BP	GO:0071498	cellular response to fluid shear stress	11	0.67937	2.12924	0.000155586	0.00302259	0.00227669	1003	tags=64%	list=14%	signal=55%	5743/10365/4313/2185/4780/445/4208
MF	GO:0004175	endopeptidase activity	161	0.320883	1.87756	0.000155619	0.00302259	0.00227669	2478	tags=51%	list=34%	signal=35%	4323/4318/4313/841/84236/11096/5638/4321/1215/4317/7113/1521/3001/360226/25862/8837/1508/10868/1509/1636/1512/57211/5664/9476/60676/1803/79056/81794/388630/170691/9528/839/80332/1515/3240/11202/5654/649/9510/8745/8728/11093/23203/23478/5327/196294/11174/10026/2191/100137047/4314/9635/3003/3004/5657/716/9629/4319/5328/9986/9099/92291/7177/6768/11095/629/101/823/834/1520/51752/4322/170689/5125/2159…
BP	GO:0002548	monocyte chemotaxis	32	0.498925	2.22852	0.000156308	0.00302604	0.00227929	1205	tags=47%	list=16%	signal=39%	3958/7941/6352/6347/6354/3627/9353/4067/284340/2358/301/100532736/26585/8792/8995
BP	GO:0071396	cellular response to lipid	328	0.27059	1.65485	0.00016211	0.00312814	0.0023562	2287	tags=43%	list=31%	signal=31%	5743/477/4318/6850/4313/27250/57048/3312/27063/2099/7431/5563/2950/2706/6347/4317/929/54209/3627/2185/3148/3158/2778/1385/4067/1374/3032/7035/1902/8648/3303/3301/56603/84868/8837/7481/3667/1277/3371/6608/7472/5580/301/8463/6591/7189/1636/7538/4282/10417/9572/2288/1604/5599/3553/3055/4360/140885/445/2782/6909/9611/811/23236/56300/7474/2353/6943/677/4208/558/1080/3552/80139/11093/6754/7520/4792/625…
BP	GO:0030323	respiratory tube development	128	0.33443	1.90217	0.000162924	0.00313364	0.00236034	1151	tags=31%	list=16%	signal=27%	1490/4323/1116/10365/4321/6441/1281/6664/3158/3202/1385/4015/7481/2719/3371/2034/7472/8817/23414/3488/1636/1512/5156/650/9496/6909/57493/1981/3911/7067/4054/7422/3694/7474/6943/7043/1050/9678/9719/9963
BP	GO:0044706	multi-multicellular organism process	102	0.356898	1.96135	0.000164077	0.00314561	0.00236935	1088	tags=32%	list=15%	signal=28%	5743/3248/4318/4313/2099/7076/2706/81671/5858/2778/5270/2354/2182/84868/1508/2192/3488/1636/2288/5997/3553/10916/7356/811/56977/7422/7056/3490/2353/7043/2201/113/3485
BP	GO:0006911	phagocytosis engulfment	25	0.538419	2.2329	0.000166467	0.0031794	0.00239481	2363	tags=76%	list=32%	signal=52%	718/51454/3684/2213/54209/246/2934/8685/84466/4627/2624/7057/3071/26228/2209/199/3689/26762/4481
BP	GO:0001910	regulation of leukocyte mediated cytotoxicity	44	0.453899	2.18716	0.000166913	0.0031794	0.00239481	2187	tags=64%	list=30%	signal=45%	5788/8807/10125/3684/2213/3821/387837/84868/7305/3635/6688/3071/22914/3824/3823/26228/4068/567/3593/135250/912/6372/2885/51571/9390/383/634/146850
BP	GO:0002824	positive regulation of adaptive immune response based on somatic recombination of immune receptors built from immunoglobulin superfamily domains	61	0.418245	2.14936	0.000167984	0.00318953	0.00240244	2294	tags=61%	list=31%	signal=42%	718/5788/924/54209/7189/5588/975/5321/1604/3553/2208/940/6556/3329/3554/64170/2625/8809/64581/10865/100/920/30009/2209/567/3593/135250/912/54537/51571/50943/9390/84861/729230/3606/7124/8741
BP	GO:0032102	negative regulation of response to external stimulus	228	0.289359	1.73763	0.000168912	0.00319691	0.00240799	2240	tags=43%	list=30%	signal=31%	3479/5788/8993/6850/6774/55646/135228/4321/2950/6347/7448/2213/5169/54209/9353/4756/3821/10225/2778/5270/4067/27202/2534/7035/9470/11005/284340/387837/84868/4192/2876/2358/5329/5580/6091/100532736/5740/7538/4282/5156/9572/26585/3055/11221/1803/140885/7056/7474/6558/55737/5802/10769/3635/134/2625/80762/10062/7391/26146/348/25939/7057/90102/5327/26058/23005/2191/100/22914/6693/3824/26228/57817/5054…
MF	GO:0004222	metalloendopeptidase activity	48	0.438772	2.1488	0.000170275	0.00320867	0.00241685	1766	tags=50%	list=24%	signal=38%	4323/4318/4313/11096/4321/4317/1636/60676/81794/388630/170691/80332/649/9510/8745/8728/11093/23203/11174/4314/9635/9629/4319/9986
MF	GO:0061134	peptidase regulator activity	111	0.349817	1.94779	0.000170616	0.00320867	0.00241685	1332	tags=34%	list=18%	signal=28%	2597/718/6590/12/135228/720/7076/2335/221476/3697/5858/5270/5273/7035/51065/11005/2719/51377/2192/10010/10213/5118/1512/1476/26577/183/871/3329/56925/7078/5269/6692/9491/20/80760/7057/140686/51079
BP	GO:0032928	regulation of superoxide anion generation	16	0.613844	2.18438	0.000173634	0.00323461	0.00243639	734	tags=56%	list=10%	signal=51%	6850/2950/3684/57126/2358/5580/7305/4137/183
BP	GO:0032930	positive regulation of superoxide anion generation	16	0.613844	2.18438	0.000173634	0.00323461	0.00243639	734	tags=56%	list=10%	signal=51%	6850/2950/3684/57126/2358/5580/7305/4137/183
BP	GO:0050671	positive regulation of lymphocyte proliferation	73	0.391045	2.06101	0.000173594	0.00323461	0.00243639	2176	tags=53%	list=30%	signal=38%	3479/5788/6850/6352/1026/11151/100133941/84868/301/7189/4254/4282/5588/975/1604/1947/3553/940/7412/4208/3552/3485/8440/596/100/916/3071/6693/10148/3593/942/912/57162/50943/199/729230/3600/3606/4690
BP	GO:0030318	melanocyte differentiation	14	0.618031	2.10759	0.000175537	0.00325615	0.00245261	2108	tags=86%	list=29%	signal=61%	4254/5167/4208/55686/596/26258/3815/83938/6663/5873/4435/1910
BP	GO:0050678	regulation of epithelial cell proliferation	202	0.302813	1.79752	0.000175889	0.00325615	0.00245261	1404	tags=31%	list=19%	signal=26%	581/3479/187/6774/23213/135228/6352/4321/6347/8828/6664/93974/185/5798/595/3148/28984/55959/3202/9500/8837/2719/4192/2876/116844/6608/7472/6591/7498/6091/2022/1893/7538/6789/6772/9572/79805/55109/11221/5314/3162/3676/3911/7422/7474/4830/2624/26471/677/4208/80139/2625/3357/3142/3664/348/51162/7057/283131/1028/56005/57142/653
BP	GO:0050866	negative regulation of cell activation	140	0.329439	1.89372	0.000176773	0.00326232	0.00245726	1669	tags=37%	list=23%	signal=29%	3958/5788/8993/55024/8832/10457/6441/11006/2213/969/5169/54209/221395/2335/4332/6664/5270/4067/84868/3956/4192/5580/301/1051/7305/5156/2729/8654/9572/10461/7356/861/7056/55824/558/3398/11117/3635/80762/3142/10062/8995/348/6385/387597/441478/6693/116449/30009/5320/3624/942
BP	GO:0120035	regulation of plasma membrane bounded cell projection organization	309	0.270318	1.64801	0.000180248	0.00330585	0.00249005	2447	tags=45%	list=33%	signal=32%	5880/4139/4897/57689/8507/7431/9456/6280/482/2213/54209/2185/2335/9353/4756/53335/5906/547/4067/5048/51104/120114/54849/2534/80031/8874/1902/1272/10435/1002/8837/4133/5063/4780/4192/960/5580/5168/6091/627/23499/2717/440730/157285/51466/4137/2288/100506658/116985/6616/5997/3320/6383/23363/10109/2316/1627/7422/7474/5962/5789/55737/7043/51199/5802/10801/23613/7779/2625/10611/5396/4921/4038/26012/846…
BP	GO:0030855	epithelial cell differentiation	342	0.26589	1.63318	0.000180248	0.00330585	0.00249005	2309	tags=42%	list=31%	signal=31%	3958/10409/4318/51176/10365/84189/26298/29842/55810/135228/2099/7431/5230/1026/80274/6664/100133941/7852/595/5906/3202/1385/1374/5048/1000/11005/56603/8609/7481/694/2034/2876/1508/6608/301/7498/1282/30812/3215/64321/7538/1051/6789/6772/650/2296/26585/3553/5314/10628/2316/57493/5660/7067/29841/839/23236/7422/7474/5962/1266/51742/6943/6659/2624/55506/677/4208/4646/5802/7490/3398/3552/1050/80139/262…
BP	GO:0001764	neuron migration	90	0.368133	2.0044	0.000181056	0.00331041	0.00249348	2725	tags=61%	list=37%	signal=39%	581/4139/4897/6774/26468/1281/8828/4756/7852/5048/5108/120114/2534/1641/9215/4192/57556/4929/3320/2316/7422/2624/4208/558/7280/10006/2625/26012/84628/8633/92737/460/4915/343472/389549/79932/23768/5361/9723/7291/6376/4692/2823/23245/26153/1600/9423/5457/10752/9620/816/9289/9201/7531/7846
BP	GO:0010575	positive regulation of vascular endothelial growth factor production	17	0.60373	2.19042	0.000186226	0.00339446	0.0025568	1030	tags=53%	list=14%	signal=46%	5743/718/6774/23213/719/55959/284340/3553/3552
BP	GO:0098657	import into cell	473	0.255481	1.59061	0.00018705	0.00339902	0.00256023	1653	tags=30%	list=22%	signal=25%	3579/3958/477/7018/718/187/5788/6850/931/338382/8804/51606/51454/2181/54453/55646/720/3762/481/6441/6347/3684/11006/7448/482/56990/929/71/2213/9214/57126/11151/151647/54209/246/55576/28965/4067/4036/2534/84286/2690/1902/636/821/2719/5795/2358/2934/5580/301/1191/4908/10868/653509/8406/6557/6547/7305/10417/975/8685/92745/9261/6457/84466/10894/6616/57007/5997/26585/3482/10461/3055/2208/7052/4360/180…
BP	GO:0035987	endodermal cell differentiation	33	0.485282	2.19138	0.000188308	0.00340102	0.00256173	967	tags=42%	list=13%	signal=37%	4323/4318/4313/4317/7448/2335/1295/1284/23168/64321/3914/4627/3676/8019
BP	GO:0002821	positive regulation of adaptive immune response	65	0.403885	2.096	0.000187767	0.00340102	0.00256173	2294	tags=58%	list=31%	signal=41%	718/5788/8631/924/54209/7189/5588/975/5321/1604/3553/2208/940/6556/3329/3554/64170/2625/8809/64581/10865/100/920/30009/2209/567/3593/135250/912/54537/51571/50943/9390/84861/729230/3606/7124/8741
BP	GO:0031343	positive regulation of cell killing	31	0.501099	2.206	0.000189748	0.00341662	0.00257349	2119	tags=68%	list=29%	signal=48%	5788/8807/10125/3684/3821/7305/5599/6688/5551/22914/3824/3823/26228/4068/567/3593/135250/912/51571/9390/383
CC	GO:0070821	tertiary granule membrane	45	0.448033	2.16816	0.000195526	0.00350998	0.00264381	2283	tags=62%	list=31%	signal=43%	963/81619/3684/338339/57126/79895/2358/966/5787/8773/6616/8655/6556/140885/2207/961/5269/2040/1535/8514/5328/5337/1536/101/634/3689/5724/23250
MF	GO:0005520	insulin-like growth factor binding	15	0.616689	2.13138	0.000201397	0.00360447	0.00271497	1088	tags=60%	list=15%	signal=51%	1490/4036/3489/3488/3482/3486/3490/3487/3485
BP	GO:0061014	positive regulation of mRNA catabolic process	67	-0.218312	-2.23449	0.000204013	0.00364028	0.00274195	387	tags=31%	list=5%	signal=30%	8570/10247/57690/4849/22849/100126333/406919/406938/407018/442900/406892/442909/406996/494335/406987/406966/664613/574457/442893/406932/406954
BP	GO:0002708	positive regulation of lymphocyte mediated immunity	64	0.403666	2.09289	0.000210876	0.00375143	0.00282567	1988	tags=53%	list=27%	signal=39%	718/5788/8807/10125/924/54209/3821/7189/975/1604/3553/2208/940/3329/3554/2625/8809/10865/22914/116449/3824/30009/3823/4068/2209/567/3593/135250/912/54537/51571/50943/9390/84861
BP	GO:0042098	T cell proliferation	113	0.348665	1.94842	0.000213913	0.00378882	0.00285384	2195	tags=48%	list=30%	signal=34%	5880/581/3958/3479/5788/6850/10125/10457/6352/6441/11006/11151/100133941/2534/84868/301/7189/4254/1051/5588/975/8654/1604/1947/3553/940/6556/7356/7412/3552/3485/80762/8995/8440/6385/916/3071/6693/10148/5320/3593/942/912/57162/50943/7001/199/383/729230/3600/3606/4690/5294/5777
BP	GO:0007507	heart development	353	0.264394	1.62802	0.000214257	0.00378882	0.00285384	1192	tags=26%	list=16%	signal=23%	50507/3479/10409/187/4313/841/27250/11096/27063/6648/1281/1026/8828/70/1396/2335/9353/6445/80274/8470/221476/6664/1385/4036/1009/4209/4015/63917/55553/9215/7481/2719/5795/6608/7472/8463/6591/6091/10052/2274/23414/129446/1386/2006/64321/1636/2022/6789/5156/9472/27295/57211/8642/650/2296/5997/26585/10203/23363/27101/7168/861/6909/2316/57493/811/10266/3611/7422/7474/6659/4000/4522/148/7412/26011/951…
BP	GO:0003013	circulatory system process	344	0.261346	1.60569	0.000216524	0.00381752	0.00287545	1714	tags=31%	list=23%	signal=25%	3579/5743/50507/477/2171/1674/10365/4313/2982/147/3762/1215/6271/481/6648/719/482/70/3627/9194/9353/6445/185/7852/5547/490/4036/2534/79717/1278/5795/2034/2876/2934/2028/10052/2006/6547/1636/2022/10631/55800/6332/2729/92745/8654/6772/120/100506658/2296/5997/183/7873/3320/5742/7168/6909/3676/2316/57493/4544/776/10266/7067/7422/6558/783/10539/148/23704/143872/3398/11117/8671/7139/134/3357/5999/7273/…
BP	GO:0060294	cilium movement involved in cell motility	60	-0.23615	-2.35211	0.000217769	0.00382808	0.0028834	2858	tags=68%	list=39%	signal=42%	8701/1768/146845/55779/25911/126820/161502/80217/80127/92749/84229/63978/114327/56171/151195/79582/255101/200373/493/29922/257177/480/25790/127602/644890/219681/219670/11092/389799/286207/117155/6652/8195/26074/164395/57119/54585/338/8632/55726/27019
BP	GO:0000122	negative regulation of transcription by RNA polymerase II	445	0.250746	1.55794	0.000218791	0.00383467	0.00288837	1554	tags=29%	list=21%	signal=24%	5788/51176/10365/6774/8553/26137/29842/57761/60468/55646/9759/2099/4321/6304/53335/6664/55509/595/3148/22913/11080/7704/9500/64324/6996/6310/10363/2354/3303/4784/54039/8609/6608/6591/4017/2274/23414/1386/7189/23168/30812/2022/7538/1051/6772/9572/9970/6672/650/55689/2296/4929/4783/9580/467/10916/10628/6421/6134/7356/57649/861/1602/6909/2308/9611/811/7067/2186/7422/51742/6943/6659/93166/2004/10608/…
BP	GO:0043300	regulation of leukocyte degranulation	25	0.531513	2.20426	0.000230003	0.00401929	0.00302743	2212	tags=72%	list=30%	signal=51%	5880/6850/8832/3684/2213/57126/4067/2624/6688/3071/729230/634/2242/2268/3566/3689/5724/6813
BP	GO:0002763	positive regulation of myeloid leukocyte differentiation	34	0.483251	2.20036	0.000233054	0.00404872	0.0030496	2459	tags=71%	list=33%	signal=47%	51176/841/1435/54209/1385/7189/4254/7305/861/2353/677/3398/8792/22985/81501/920/3593/3976/8737/2242/4853/7124/1230/5457
BP	GO:0051098	regulation of binding	104	0.351333	1.93897	0.000232684	0.00404872	0.0030496	1580	tags=37%	list=21%	signal=29%	581/3479/6590/4318/51176/57761/9759/1026/7448/3001/6664/64324/4133/6608/5329/7189/627/146057/6672/2296/5599/3925/3676/1981/25805/5899/4830/1454/3300/2625/55355/26086/10763/64388/285381/8864/2801/1193
CC	GO:0022627	cytosolic small ribosomal subunit	27	0.514135	2.17093	0.000246139	0.00426354	0.0032114	3354	tags=96%	list=45%	signal=53%	51065/6217/3921/6201/6210/6223/6193/6205/6231/6202/6187/6188/6224/6229/6203/6192/6228/6227/2197/6232/6235/6206/6208/6218/6230/6194
CC	GO:0043235	receptor complex	205	0.295836	1.75762	0.000248355	0.00428937	0.00323086	2446	tags=50%	list=33%	signal=34%	7018/1441/5284/6850/8807/8631/3326/3684/929/8828/54209/2185/3821/4067/4036/2690/3667/960/5745/7189/5787/8516/2022/9244/5156/650/10461/9344/10203/3329/9865/3676/2316/10266/2675/3694/558/5362/11117/115207/3357/55600/54518/7188/4921/10062/919/8809/22925/90/916/3595/920/925/974/3824/3823/6957/567/3815/3682/7010/84171/57125/4915/57406/8737/7187/214/657/5024/57491/26996/3977/9180/634/1437/1436/1439/356…
MF	GO:0005125	cytokine activity	102	0.350586	1.92665	0.000251368	0.00432879	0.00326055	2493	tags=57%	list=34%	signal=38%	123920/6352/7076/1435/6347/6354/9518/414062/3627/7481/7472/4254/9244/4282/3557/650/55258/26585/3553/9547/7422/56300/7474/649/7043/3552/8995/64388/653/54097/6367/10148/3624/3593/3976/6372/131177/51384/8743/92304/1437/2896/3600/3606/90865/4693/5008/7124/6357/6376/2921/8742/8741/392255/6348/3084/654/2661
BP	GO:0022617	extracellular matrix disassembly	32	0.490182	2.18947	0.00025974	0.00443837	0.00334309	2251	tags=66%	list=31%	signal=46%	4323/4318/4313/11096/4321/1215/4317/3936/2022/1803/1515/285590/4921/2191/4314/4319/7177/101/1520/4322/170689
BP	GO:0000768	syncytium formation by plasma membrane fusion	35	0.473383	2.17163	0.000260728	0.00443837	0.00334309	787	tags=40%	list=11%	signal=36%	963/11096/135228/9518/54209/3627/4756/8837/51177/7305/975/9644/79805/4627
BP	GO:0140253	cell-cell fusion	35	0.473383	2.17163	0.000260728	0.00443837	0.00334309	787	tags=40%	list=11%	signal=36%	963/11096/135228/9518/54209/3627/4756/8837/51177/7305/975/9644/79805/4627
BP	GO:0071347	cellular response to interleukin-1	52	0.416972	2.0744	0.00026059	0.00443837	0.00334309	1307	tags=38%	list=18%	signal=32%	7850/10365/4313/27063/6352/5603/6347/10010/7189/5740/9572/3557/3553/140885/961/23236/3554/8808/4792/1958
MF	GO:0050840	extracellular matrix binding	51	0.423705	2.10026	0.00026565	0.0045092	0.00339644	2985	tags=75%	list=40%	signal=45%	3958/11096/7448/9353/8404/3956/1634/2006/4053/57124/57211/2817/3921/633/7045/7422/9719/7057/25903/259/284297/3491/1520/2199/3690/64094/170689/131578/64129/55901/6678/161198/9806/9289/3688/4811/7148/1605
BP	GO:0006979	response to oxidative stress	215	0.289331	1.72793	0.000266849	0.0045166	0.00340202	1569	tags=32%	list=21%	signal=26%	5743/5052/4323/10365/4313/8807/51022/6648/5563/5603/2950/2706/2185/2176/2168/5798/3039/2534/2936/3303/10218/140809/4780/1277/5371/2034/10516/2876/1410/5580/1386/5156/2729/4137/6772/4929/5599/140885/3162/7351/10628/5742/7168/7356/2308/847/1827/3240/2353/10276/558/3552/4921/83959/2937/3043/348/9555/2879/2878/22925/22921/27067/8452/596/8575/4314/4504
BP	GO:0002688	regulation of leukocyte chemotaxis	80	0.372687	1.99178	0.000269565	0.00454959	0.00342686	895	tags=31%	list=12%	signal=28%	5880/3579/7941/6352/1435/6347/719/6354/3627/2185/9353/4067/27202/284340/5795/4192/2358/2277/100532736/4282/26585/1803/811/7422/7474
BP	GO:0007169	cell surface receptor protein tyrosine kinase signaling pathway	363	0.263783	1.62497	0.000271139	0.00456314	0.00343707	1737	tags=32%	list=24%	signal=26%	5157/1490/3479/4323/4318/5284/6850/4313/6774/23213/11122/399694/8483/1435/5579/9518/7448/8828/51237/924/2185/26999/200958/55959/4067/2534/8874/2690/222584/4015/114882/3667/5063/1277/5795/5329/5580/2277/1634/7498/6091/4908/8817/1284/1282/627/1509/3489/2202/3488/5156/5588/57556/5167/2817/9261/650/2296/387914/3482/1947/10461/3553/3055/183/10628/3486/9019/3925/6909/2308/2675/23236/7422/7474/3487/5899…
BP	GO:0006956	complement activation	31	0.490246	2.15822	0.000276682	0.00461709	0.00347771	836	tags=42%	list=11%	signal=37%	718/720/713/712/729/54209/28984/3075/1191/966/1604/3553/730
BP	GO:0046660	female sex differentiation	62	0.40671	2.09594	0.00027567	0.00461709	0.00347771	1022	tags=35%	list=14%	signal=31%	581/4323/4313/10184/2099/56729/9353/5798/4036/23414/4254/1051/5156/2296/10461/1602/7422/7474/26471/9510/558/7490
BP	GO:0042475	odontogenesis of dentin-containing tooth	43	0.43409	2.08514	0.000276674	0.00461709	0.00347771	1210	tags=40%	list=16%	signal=33%	581/1441/51176/1435/5579/3371/6608/7189/5156/650/2296/3911/3694/1080/26504/10018/4038
BP	GO:0014812	muscle cell migration	68	0.382618	1.99849	0.000278369	0.00463219	0.00348908	2181	tags=53%	list=30%	signal=38%	3479/6352/7448/9353/80031/1902/4780/4192/6608/301/51177/3488/1636/10631/84466/8840/3486/7168/2887/10276/9510/4208/4921/5770/5327/596/5054/1649/4193/5328/657/255394/199/3037/3690/5361
BP	GO:0001774	microglial cell activation	28	0.512844	2.19084	0.000280049	0.00463411	0.00349053	2357	tags=75%	list=32%	signal=51%	5788/3684/712/4317/54209/1191/7305/4137/9572/3459/26228/199/728/2896/90865/3689/7097/7098/7124/6376/6348
BP	GO:0042100	B cell proliferation	48	0.428422	2.09812	0.000280009	0.00463411	0.00349053	1783	tags=48%	list=24%	signal=37%	581/5788/51176/931/10125/1026/2213/51237/4332/4067/5580/4282/7305/975/3329/4208/3635/596/100/3071/22806/930/57162
BP	GO:0031344	regulation of cell projection organization	314	0.26814	1.63729	0.000284809	0.00469975	0.00353997	2447	tags=45%	list=33%	signal=32%	5880/4139/4897/57689/8507/7431/9456/6280/482/2213/54209/2185/2335/9353/4756/53335/5906/547/4067/5048/51104/120114/54849/2534/80031/8874/1902/1272/10435/1002/8837/4133/5063/4780/4192/960/5580/5168/6091/627/23499/2717/440730/157285/51466/4137/2288/100506658/116985/6616/5997/3320/6383/23363/10109/2316/1627/7422/7474/5962/5789/55737/7043/51199/5802/10801/23613/7779/2625/10611/5396/4921/4038/26012/846…
CC	GO:0005788	endoplasmic reticulum lumen	197	0.298889	1.77253	0.000289656	0.00476644	0.0035902	1738	tags=36%	list=24%	signal=28%	5743/7018/718/81619/11096/720/7076/1435/3309/1281/7448/51237/2335/1000/5954/821/1295/1297/1286/8404/2719/3956/1277/1278/3371/2326/5329/1191/1284/1282/627/3488/54587/7873/6383/871/3486/85301/811/60681/283208/7474/2098/9601/3490/27248/3487/51661/79709/56886/11093/5768/64222/348/7057/1305/1622/56005/54972/1114/51148/920/2153/10148/567/5033/50509/3593/174/197/213
BP	GO:0002223	stimulatory C-type lectin receptor signaling pathway	16	0.601623	2.14089	0.000299522	0.00488806	0.00368181	1879	tags=75%	list=25%	signal=56%	6850/3821/4067/2534/5063/7189/7305/64581/22914/3824/3823/5058
BP	GO:1990840	response to lectin	16	0.601623	2.14089	0.000299522	0.00488806	0.00368181	1879	tags=75%	list=25%	signal=56%	6850/3821/4067/2534/5063/7189/7305/64581/22914/3824/3823/5058
BP	GO:1990858	cellular response to lectin	16	0.601623	2.14089	0.000299522	0.00488806	0.00368181	1879	tags=75%	list=25%	signal=56%	6850/3821/4067/2534/5063/7189/7305/64581/22914/3824/3823/5058
CC	GO:0044391	ribosomal subunit	112	0.340826	1.8992	0.000301188	0.00490175	0.00369212	4322	tags=91%	list=59%	signal=38%	6138/7311/51065/6164/5935/6217/3921/6134/285855/6171/6160/51021/6201/4736/6122/6152/6159/6210/6173/6146/9349/6223/6135/28973/6132/6137/6166/9045/6155/6193/6154/11224/6205/6141/6158/6128/6133/6231/6161/6175/6144/6129/6202/6139/25873/6187/6130/6188/6224/6181/6229/6143/6165/6203/6192/6167/6142/6156/6168/6169/6124/6228/6227/2197/6232/6235/6157/6206/6170/6125/6208/23521/6136/6218/6176/122704/64979/955…
BP	GO:0071621	granulocyte chemotaxis	79	0.37416	1.99473	0.000302071	0.00490265	0.0036928	1593	tags=38%	list=22%	signal=30%	5880/3579/3958/1441/6850/6352/1435/6347/719/6280/6279/6354/3627/9353/27202/284340/5795/4192/301/3553/1803/2207/1800/7422/8995/57580/7057/3929/6367/3071
CC	GO:0098797	plasma membrane protein complex	283	0.271509	1.64875	0.000303037	0.00490489	0.00369449	2446	tags=46%	list=33%	signal=32%	5880/50507/3479/477/7018/6850/8807/841/8631/3762/6281/481/2706/3684/7448/482/729/2185/4756/6445/10297/2778/4067/1009/3790/1000/55970/1002/8837/3667/10052/56479/7189/8516/55800/6332/8642/5664/650/6616/784/28316/10203/2782/79026/3676/2316/2207/730/776/10266/3694/783/7412/23704/2791/11117/54518/7188/3756/10811/919/3776/20/3745/64405/6328/8809/1305/2790/1535/59345/8514/733/6326/90/6323/916/920/925/97…
BP	GO:0034284	response to monosaccharide	93	0.358837	1.96265	0.000311957	0.00503551	0.00379287	1307	tags=34%	list=18%	signal=29%	5743/50507/7447/26137/1215/6648/5563/5579/54209/2185/5798/3158/8609/1277/2876/9462/1636/2729/9572/7351/10628/847/23236/6659/1080/3552/7391/2752/3170/3745/7057/1958
BP	GO:0120162	positive regulation of cold-induced thermogenesis	51	0.422023	2.09192	0.000313514	0.00504689	0.00380144	1538	tags=43%	list=21%	signal=34%	3934/2171/6850/51316/4237/7852/2778/249/2034/2104/1051/26580/50486/7351/7067/7422/2887/33/2271/79813/8864/2628
BP	GO:1905523	positive regulation of macrophage migration	19	0.560483	2.09708	0.000319411	0.00512789	0.00386246	2357	tags=79%	list=32%	signal=54%	4323/6352/1435/719/54209/284340/5795/4192/8995/7057/57142/728/1436/6376/6348
BP	GO:0090287	regulation of cellular response to growth factor stimulus	194	0.293992	1.74355	0.000321585	0.00514884	0.00387824	1569	tags=33%	list=21%	signal=27%	23213/135228/8483/3309/3326/5579/9518/7448/9353/4756/26999/6664/55959/4036/283149/4015/3303/8837/2719/116844/1634/7498/6091/8817/100532736/8516/2022/57556/2817/650/387914/26585/3553/55612/183/9315/25805/3611/7422/7474/27122/51742/5654/23625/2887/7043/80139/2201/11117/26036/2625/9719/25778/56937/7057/1028/5770/90993/64388/58533/6498/151556/58495/4504
BP	GO:0097305	response to alcohol	139	0.322364	1.85583	0.000322553	0.00515042	0.00387942	2496	tags=52%	list=34%	signal=35%	3248/5788/10365/841/6648/5563/1026/5579/6279/6354/929/2185/9353/6138/3158/2778/1385/1374/2534/2690/2354/3371/6608/6000/10213/1636/5997/2782/847/1981/3490/10654/2353/7412/1036/1080/113/64170/2625/8792/5999/20/598/7832/151556/939/3624/114/4193/6446/50943/4040/4988/4736/4087/6338/1536/5737/1234/2539/7124/131/1933/6531/6348/2/196/6916/2890/6559/8061/54331
MF	GO:0043274	phospholipase binding	13	0.644104	2.13217	0.000325418	0.0051822	0.00390336	1689	tags=77%	list=23%	signal=59%	6850/55024/5048/2534/4001/22925/6401/7454/3932/29760
BP	GO:0043254	regulation of protein-containing complex assembly	240	0.276483	1.66386	0.000330378	0.00523305	0.00394166	1593	tags=31%	list=22%	signal=25%	581/3958/5341/6850/8631/3312/3309/11151/54209/246/2185/9353/26999/53335/8874/3303/81553/10435/9885/4133/5063/2934/1410/5580/1191/2006/3936/51466/4137/120/2288/100506658/5599/3055/55612/3320/388630/10109/51100/3925/1981/7067/7422/6709/5962/8775/55737/5899/81926/25999/9641/7408/90427/10565/64853/55355/10018/23339/8995/8440/26146/348/57580/7429/8543/64581/22919/157922/6403/57617/10787/55142/221074/4…
BP	GO:0048858	cell projection morphogenesis	344	0.258497	1.58819	0.000330378	0.00523305	0.00394166	2459	tags=45%	list=33%	signal=32%	4897/9448/84189/65059/57689/71/8828/2335/9353/4756/26999/53335/7852/1385/547/4036/5048/1009/2534/80031/8874/473/1272/3996/1002/10678/54910/8609/4133/5063/5795/4192/960/6608/23114/5168/6091/4908/51177/627/23499/100532736/2717/10631/223117/51466/5588/57556/2115/4137/4929/6616/1947/9344/6383/23363/3925/3676/1627/7422/7474/5789/11202/51199/80243/5802/3251/7779/10006/2625/7408/59352/10611/4038/26012/8…
CC	GO:0034708	methyltransferase complex	47	-0.266182	-2.33694	0.000335976	0.00530752	0.00399776	4911	tags=94%	list=67%	signal=31%	6635/2079/9757/6636/6637/6632/6628/5931/3028/3276/6634/83640/259282/9589/6880/8607/84661/23091/3720/91272/8085/4221/125476/8726/5929/6045/11091/26147/23135/23269/51605/23054/51230/63925/6874/26168/23067/6879/4297/7403/9739/79447/27043/5928
BP	GO:0042692	muscle cell differentiation	226	0.292722	1.75746	0.000339492	0.0053488	0.00402885	1194	tags=28%	list=16%	signal=24%	50507/3479/187/4323/963/27250/9759/11096/27063/6648/9456/9518/71/70/3627/4756/8470/221476/1000/4015/56603/55553/9215/54910/8837/2876/6608/30008/2274/51177/627/8516/3488/2022/5156/975/9472/84466/650/5997/26585/23363/4627/7168/6909/1827/811/10266/7422/1466/4000/93166/148/4208/7490/3398/7139/10611/3756/5999/7273/4607/10290
BP	GO:0001539	cilium or flagellum-dependent cell motility	61	-0.225859	-2.23678	0.000349627	0.00547934	0.00412718	2858	tags=67%	list=39%	signal=42%	8701/1768/146845/55779/25911/126820/161502/80217/80127/92749/84229/63978/114327/56171/151195/79582/255101/200373/493/29922/257177/480/25790/127602/644890/219681/219670/11092/389799/286207/117155/6652/8195/26074/164395/57119/54585/338/8632/55726/27019
BP	GO:0060285	cilium-dependent cell motility	61	-0.225859	-2.23678	0.000349627	0.00547934	0.00412718	2858	tags=67%	list=39%	signal=42%	8701/1768/146845/55779/25911/126820/161502/80217/80127/92749/84229/63978/114327/56171/151195/79582/255101/200373/493/29922/257177/480/25790/127602/644890/219681/219670/11092/389799/286207/117155/6652/8195/26074/164395/57119/54585/338/8632/55726/27019
BP	GO:0010563	negative regulation of phosphorus metabolic process	149	0.316246	1.83368	0.000353869	0.00551664	0.00415527	1416	tags=32%	list=19%	signal=26%	5788/5341/6774/27250/142679/57761/11122/9759/5230/2950/1026/11006/9353/93974/4067/3301/5795/6608/5580/7498/2192/4908/6547/116496/5167/100506658/5997/3553/8655/64943/11221/183/3486/57493/9611/1981/26471/80243/64853/20/26146/348/57580/9555/1028/5770/58533
BP	GO:0045936	negative regulation of phosphate metabolic process	149	0.316246	1.83368	0.000353869	0.00551664	0.00415527	1416	tags=32%	list=19%	signal=26%	5788/5341/6774/27250/142679/57761/11122/9759/5230/2950/1026/11006/9353/93974/4067/3301/5795/6608/5580/7498/2192/4908/6547/116496/5167/100506658/5997/3553/8655/64943/11221/183/3486/57493/9611/1981/26471/80243/64853/20/26146/348/57580/9555/1028/5770/58533
BP	GO:0060627	regulation of vesicle-mediated transport	256	0.281256	1.69814	0.000357719	0.00554746	0.00417848	2214	tags=42%	list=30%	signal=30%	5880/3958/7018/7447/718/187/5788/6850/8832/2181/55646/720/6281/6441/6347/5579/3684/7448/929/71/2213/1731/57126/11151/54209/246/5906/4067/1902/636/51201/2719/5795/2358/301/1191/4908/6457/115827/26585/10461/3055/7052/6556/140885/2207/811/961/7422/7474/5962/2624/558/1080/25999/2619/4638/10062/20/3745/348/6385/1535/64581/5770/6688/2212/9525/57617/6401/347730/5865/3071/5657/26228/2209/60/567/57817/505…
BP	GO:0002764	immune response-regulating signaling pathway	302	0.263836	1.6084	0.000357719	0.00554746	0.00417848	2226	tags=41%	list=30%	signal=30%	581/3958/718/5788/5284/6850/931/55024/338382/123920/8631/3312/2099/5579/719/6280/3684/6279/285852/11006/2357/929/338339/2213/9214/54209/92747/3821/4332/100133941/4067/27202/2534/3303/387837/84868/57590/5063/5795/2358/5580/7189/1512/7305/5588/975/9572/9261/92610/5599/3055/2208/784/940/3329/9865/81622/2207/961/81926/4208/5802/7105/3635/2625/4792/10062/919/8525/1535/64581/57142/3929/2212/596/100/916…
BP	GO:0042088	T-helper 1 type immune response	33	0.47641	2.15132	0.000358686	0.00554792	0.00417884	2205	tags=67%	list=30%	signal=47%	51176/6775/84868/301/7189/5321/3553/6556/3554/3142/8809/10865/6693/30009/10148/3593/729230/3606/90865/10068/3566/64218
BP	GO:0043405	regulation of MAP kinase activity	62	0.401153	2.0673	0.00036049	0.0055613	0.00418891	1362	tags=39%	list=18%	signal=32%	10125/27250/142679/57761/2950/100133941/4067/2690/3301/5795/6091/4908/8817/7189/5997/3553/11221/183/7474/64853/8792/348/7057/5770
BP	GO:0010543	regulation of platelet activation	32	0.482456	2.15496	0.000363633	0.00559523	0.00421447	1489	tags=50%	list=20%	signal=40%	5341/6850/5270/4067/5795/5580/5156/5588/5321/2316/2207/7056/11117/348/65991/6403
BP	GO:0001935	endothelial cell proliferation	95	0.350015	1.91319	0.00036891	0.00566171	0.00426454	2348	tags=52%	list=32%	signal=36%	187/4323/6774/23213/6347/8828/93974/185/3148/28984/1295/4192/116844/7472/4017/7498/2022/1893/6772/79805/55109/3162/3676/7422/7474/2624/4208/3357/348/51162/7057/947/56005/441478/3593/7010/8862/9037/79812/168667/3690/60675/5629/949/7124/22846/8854/8742/1969
BP	GO:0017015	regulation of transforming growth factor beta receptor signaling pathway	84	0.352092	1.8922	0.000376615	0.00576503	0.00434237	1422	tags=37%	list=19%	signal=30%	135228/8483/3309/3326/9518/6664/283149/4015/3303/116844/8516/2022/650/55612/9315/25805/27122/51742/5654/23625/7043/80139/2201/11117/26036/9719/56937/7057/1028/58533/6498
BP	GO:0061900	glial cell activation	33	0.475507	2.14724	0.000378475	0.00577857	0.00435257	2357	tags=70%	list=32%	signal=48%	5788/3684/712/4317/54209/6608/1191/7305/4137/9572/3553/3459/26228/199/728/2896/90865/3689/7097/7098/7124/6376/6348
BP	GO:0050779	RNA destabilization	65	-0.225804	-2.27156	0.000381267	0.00579135	0.00436219	387	tags=32%	list=5%	signal=31%	8570/10247/57690/4849/22849/100126333/406919/406938/407018/442900/406892/442909/406996/494335/406987/406966/664613/574457/442893/406932/406954
MF	GO:0020037	heme binding	51	0.419597	2.0799	0.000380523	0.00579135	0.00436219	1732	tags=47%	list=23%	signal=36%	5743/1571/50507/2982/79689/3039/56603/5740/9572/3162/5742/847/1580/1528/54205/1537/1593/3043/1535/1573/55240/1548/1576/259
BP	GO:0090183	regulation of kidney development	19	0.557404	2.08556	0.000388044	0.00587921	0.00442837	1109	tags=53%	list=15%	signal=45%	10409/9500/6608/30812/6772/26585/183/7422/7490/2625
BP	GO:0071560	cellular response to transforming growth factor beta stimulus	169	0.305149	1.78839	0.000395359	0.00597476	0.00450034	1583	tags=34%	list=21%	signal=27%	3248/6774/27063/135228/8483/3309/1281/3326/9518/6664/2534/283149/4015/3303/55553/8837/1277/1278/5371/116844/7472/1284/8516/2022/10631/4053/650/55612/9315/25805/4054/3694/7474/27122/51742/2353/5654/23625/7043/677/4208/80139/2201/11117/26036/2331/9719/4921/56937/7057/59/1028/58533/6498/90/58495/81501
BP	GO:0051917	regulation of fibrinolysis	11	0.659649	2.06743	0.000398772	0.00601101	0.00452765	1711	tags=82%	list=23%	signal=63%	7448/5329/7056/7391/7057/5327/2191/5054/5328
BP	GO:0010828	positive regulation of D-glucose transmembrane transport	23	0.544565	2.19778	0.000405636	0.00609895	0.00459388	1472	tags=57%	list=20%	signal=45%	3479/718/114882/3667/2719/4780/100506658/25999/55600/6041/6506/23596/151176
BP	GO:0010975	regulation of neuron projection development	212	0.289129	1.72368	0.000408253	0.00612276	0.00461181	1729	tags=35%	list=23%	signal=28%	4139/4897/57689/8507/7431/6280/482/2185/2335/9353/4756/53335/5906/547/4067/5048/120114/2534/80031/1902/1272/1002/8837/4133/5063/4780/4192/6091/627/23499/2717/440730/157285/4137/2288/6616/5997/6383/23363/2316/1627/7422/7474/5789/51199/5802/7779/2625/10611/5396/4921/4038/26012/84628/26052/348/23413/57580/5770/55704/57142/653/6498/27067/349667/57520/221074/4504/567/10500/140578/4193/7025/4915
BP	GO:0060538	skeletal muscle organ development	96	0.347135	1.89948	0.000409423	0.0061248	0.00461336	1488	tags=36%	list=20%	signal=29%	1674/10409/27063/9456/10791/6664/4209/283149/56603/9215/8837/2876/6608/2006/30812/2817/84466/467/445/1827/10362/2353/6943/26471/4208/7490/3142/1958/5079/10869/6498/92737/596/7832/93185
CC	GO:1904724	tertiary granule lumen	37	0.459836	2.12386	0.000411801	0.00614485	0.00462846	2195	tags=62%	list=30%	signal=44%	4318/8993/4317/10562/116844/1509/2495/1512/1476/4069/226/3240/6709/3608/5768/3043/5004/567/23191/51646/820/1520/5777
BP	GO:0061157	mRNA destabilization	64	-0.229701	-2.24788	0.000414752	0.00617334	0.00464991	387	tags=33%	list=5%	signal=31%	8570/10247/57690/4849/22849/100126333/406919/406938/407018/442900/406892/442909/406996/494335/406987/406966/664613/574457/442893/406932/406954
BP	GO:0071216	cellular response to biotic stimulus	154	0.310632	1.81076	0.000422359	0.00625514	0.00471153	2240	tags=46%	list=30%	signal=33%	5743/4318/6850/27250/57048/27063/7431/2950/6347/3309/4317/929/2213/54209/3627/3148/3158/4067/3032/84868/7189/7538/4282/10417/9572/1604/5599/3553/3055/4360/140885/10628/445/56300/7474/4208/558/3552/11093/4792/10062/64581/3929/10865/4314/22914/26228/567/5054/3593/942/3394/23097/1649/6372/10318/51571/7001/1910/820/834/1234/1437/3606/4853/5724/5777/949/7097/7124/6376
BP	GO:0002831	regulation of response to biotic stimulus	296	0.270322	1.64594	0.000421515	0.00625514	0.00471153	2216	tags=42%	list=30%	signal=31%	6850/8807/10125/841/338382/55646/10621/3312/2099/6352/4321/6280/6279/285852/929/2213/54209/92747/3821/10225/4332/3148/4067/1374/2534/9470/11005/3303/387837/84868/3075/57590/5063/4780/5371/2358/7189/4282/7305/6772/9572/9261/1604/92610/5599/3553/3055/11221/3320/140885/3329/6421/9865/81622/1660/839/7474/81926/5802/11117/7105/3635/9641/64170/7520/10133/4792/10062/26146/348/25939/1535/64581/5770/57142…
BP	GO:0032303	regulation of icosanoid secretion	14	0.601712	2.05194	0.000425035	0.00627908	0.00472956	1420	tags=64%	list=19%	signal=52%	6850/2182/4282/5321/3553/3552/6754/8792/22925
CC	GO:0035580	specific granule lumen	38	0.456725	2.12821	0.000430374	0.00633014	0.00476802	1098	tags=39%	list=15%	signal=34%	3934/1116/6590/8993/26/4317/10562/56729/116844/1509/4069/3240/6709/3608/5768
BP	GO:0050878	regulation of body fluid levels	209	0.293261	1.74511	0.000430629	0.00633014	0.00476802	1723	tags=35%	list=23%	signal=28%	187/5341/6850/23452/90139/5638/1281/7448/71/1606/80274/595/1131/2778/1385/5270/4067/7035/8648/10218/4780/5795/5329/5580/7498/2192/966/2717/5156/5588/5321/10461/79056/4627/2316/57493/2207/3611/7422/7056/4830/1036/558/1080/11117/11093/134/10062/7391/51297/3170/3043/348/8525/4883/7057/2313/1535/10398/65991/5327/26258/6403/2191/100/7454/2153/3932/2151/60/5054/5328/8862/23657
BP	GO:0014897	striated muscle hypertrophy	49	0.422298	2.07802	0.000432719	0.00634512	0.0047793	1182	tags=39%	list=16%	signal=33%	3479/9759/7222/8470/221476/3488/9472/8654/5997/183/2308/4000/10539/148/29995/10611/3357/5999/7273
BP	GO:0071715	icosanoid transport	27	0.5052	2.13321	0.000433823	0.0063456	0.00477966	1629	tags=56%	list=22%	signal=43%	5743/6850/2182/301/1636/4282/5321/3553/3552/6754/8792/28232/22925/255189/5320
MF	GO:0000978	RNA polymerase II cis-regulatory region sequence-specific DNA binding	390	0.255467	1.58064	0.000435186	0.00634986	0.00478287	1574	tags=29%	list=21%	signal=24%	51176/10365/6774/8553/26137/26298/29842/60468/55810/9759/11317/2099/6671/6775/6304/53335/6664/55509/2295/3202/1385/7704/64324/2122/4209/2354/4784/55553/4862/79800/8609/4780/2034/8463/6591/4807/2104/1386/56981/30812/3215/64321/171017/1051/2115/6772/9572/9970/55311/1052/2296/4929/4783/4603/9496/9580/467/861/1602/6909/2308/1660/7067/29841/2186/84146/83439/1628/26959/2353/6943/55749/6659/2004/10608/4…
BP	GO:0032481	positive regulation of type I interferon production	40	0.441401	2.07914	0.000439164	0.00637649	0.00480293	1076	tags=38%	list=15%	signal=32%	2597/6850/26137/10621/4321/929/3148/6675/10010/7189/6772/3320/3329/1660/9641
CC	GO:0098803	respiratory chain complex	71	0.381362	2.00083	0.000438333	0.00637649	0.00480293	3317	tags=79%	list=45%	signal=44%	84419/1337/4710/1340/440567/84701/1349/506/1537/4705/51079/4713/514/125965/27089/56901/4696/10632/9551/4698/4702/1329/509/4700/1350/4714/516/4697/522/1347/1327/1345/1351/539/54539/10975/9377/513/10476/4695/4694/4718/4715/4711/515/1339/4716/126328/4708/4717/4712/4726/4706/55967/4709/4731
BP	GO:0032784	regulation of DNA-templated transcription elongation	31	-0.344009	-2.57885	0.000442355	0.00640712	0.004826	1992	tags=68%	list=27%	signal=50%	905/79577/3192/142/25896/25920/6837/9442/1025/643376/10614/55090/80237/9441/55837/57117/8312/51497/57805/9862/55726
BP	GO:0001912	positive regulation of leukocyte mediated cytotoxicity	29	0.481092	2.06485	0.000445575	0.00643802	0.00484928	2119	tags=66%	list=29%	signal=47%	5788/8807/10125/3684/3821/7305/6688/22914/3824/3823/26228/4068/567/3593/135250/912/51571/9390/383
BP	GO:0048589	developmental growth	342	0.258602	1.58841	0.000453414	0.00653533	0.00492258	1569	tags=29%	list=21%	signal=24%	3479/10409/10365/4897/6774/51316/84189/65059/2099/1435/1281/1026/55224/9518/8828/2335/9353/8470/221476/26999/53335/7852/2778/3202/1385/5048/80031/2690/10404/9215/1002/8837/4133/7481/4192/3371/2876/6608/9462/7472/301/23414/1386/627/23168/23499/10631/1893/6789/975/9472/4137/2296/5997/11221/22809/7458/85301/861/6909/3676/57493/5660/23236/7422/7474/85407/148/26011/51199/677/4208/5802/7490/2619/2625/5…
BP	GO:0002269	leukocyte activation involved in inflammatory response	31	0.480773	2.11652	0.000456148	0.00655879	0.00494024	2357	tags=71%	list=32%	signal=48%	5788/3684/712/4317/54209/1191/7305/4137/9572/3459/26228/6338/199/728/2896/90865/3689/7097/7098/7124/6376/6348
BP	GO:0051146	striated muscle cell differentiation	166	0.309343	1.81215	0.00047263	0.00676973	0.00509913	1192	tags=30%	list=16%	signal=25%	50507/3479/4323/963/9759/11096/27063/9456/9518/71/70/3627/4756/8470/221476/1000/56603/55553/9215/8837/2876/6608/2274/51177/627/3488/5156/975/9472/650/5997/26585/23363/4627/7168/1827/811/7422/1466/4000/148/4208/7490/7139/10611/3756/5999/7273/4607
BP	GO:0001667	ameboidal-type cell migration	146	0.311694	1.80158	0.000473104	0.00676973	0.00509913	2277	tags=47%	list=31%	signal=33%	4318/9448/7076/8828/11151/2335/5048/1000/80031/8874/54910/2719/5371/116844/6608/6591/5168/30812/23499/4254/64321/223117/1512/51466/57556/57124/1947/55612/11221/3676/3911/811/3611/7422/7474/2201/7145/3357/4921/29941/7057/59/152007/7429/6385/57142/6615/90/58495/3815/10500/6663/9037/117584/1910/3037/3690/5585/5629/7869/9723/6405/64218/10507/10501/7291/5216/10512/358
MF	GO:0046906	tetrapyrrole binding	53	0.420316	2.09848	0.00047426	0.00676992	0.00509927	1732	tags=47%	list=23%	signal=36%	5743/1571/50507/2982/79689/3039/56603/5740/9572/3162/5742/847/1580/1528/54205/1537/55788/1593/3043/1535/1573/55240/1548/1576/259
BP	GO:0150146	cell junction disassembly	19	0.552565	2.06745	0.000477794	0.00678765	0.00511263	959	tags=47%	list=13%	signal=41%	718/9448/713/3684/712/54209/6591/3553/7043
BP	GO:0002706	regulation of lymphocyte mediated immunity	103	0.348049	1.91581	0.000476927	0.00678765	0.00511263	2216	tags=51%	list=30%	signal=37%	718/5788/8807/10125/11006/2213/924/54209/3821/10225/387837/84868/7189/975/1604/3553/2208/940/3329/3554/3635/2625/80762/8809/10865/3071/22914/6693/7454/116449/3824/30009/3823/4068/2209/567/3593/135250/912/2885/54537/51571/50943/441168/9390/84861/383/729230/634/3606/146850/5777/7124
BP	GO:1903313	positive regulation of mRNA metabolic process	80	-0.181117	-2.14099	0.000481978	0.0068207	0.00513752	387	tags=28%	list=5%	signal=26%	8570/10247/65109/57690/4849/22849/100126333/406919/406938/407018/442900/406892/442909/406996/494335/406987/406966/664613/574457/442893/406932/406954
BP	GO:1990868	response to chemokine	46	0.42951	2.08873	0.000483574	0.0068207	0.00513752	902	tags=37%	list=12%	signal=33%	3579/6352/6347/6354/414062/54209/3627/2185/9353/643/7852/4067/4015/6091/2296/57007/6558
BP	GO:1990869	cellular response to chemokine	46	0.42951	2.08873	0.000483574	0.0068207	0.00513752	902	tags=37%	list=12%	signal=33%	3579/6352/6347/6354/414062/54209/3627/2185/9353/643/7852/4067/4015/6091/2296/57007/6558
BP	GO:0048260	positive regulation of receptor-mediated endocytosis	27	0.501351	2.11695	0.000499784	0.00698283	0.00525964	1827	tags=59%	list=25%	signal=45%	7018/718/187/6850/7448/636/1191/4908/26585/7422/6401/567/57817/5054/8862/9779
BP	GO:0002228	natural killer cell mediated immunity	45	0.431478	2.08805	0.00049911	0.00698283	0.00525964	2195	tags=60%	list=30%	signal=42%	914/5052/8807/10125/11151/3821/10225/387837/84868/10383/3635/4818/22914/116449/3824/3823/4068/3593/135250/10870/2885/5873/441168/634/3606/146850/5777
BP	GO:0003300	cardiac muscle hypertrophy	47	0.41787	2.04324	0.000497008	0.00698283	0.00525964	1182	tags=38%	list=16%	signal=32%	3479/9759/7222/8470/221476/9472/8654/5997/183/2308/4000/10539/148/29995/10611/3357/5999/7273
BP	GO:0009410	response to xenobiotic stimulus	215	0.283874	1.69534	0.000499661	0.00698283	0.00525964	2502	tags=47%	list=34%	signal=32%	5743/1571/4313/2327/1063/27063/6648/5563/2950/1026/5579/969/2185/7852/2052/595/3158/1385/4067/1374/4015/2354/56603/4862/4780/1277/2876/2326/340485/1636/2022/2729/6772/120/9/3553/54498/316/3320/122622/10628/445/7356/847/811/1800/2353/148/79762/4208/4646/2940/3485/64170/2625/7520/3357/284996/20/6506/7057/1573/596/26258/100/2939/3071/3932/1548/3777/4193/1576/13/119391/6663/11044/134147/57491/314/633…
BP	GO:0009636	response to toxic substance	136	0.315321	1.8051	0.000501668	0.00699266	0.00526705	1768	tags=38%	list=24%	signal=30%	581/5743/5052/6352/6648/2950/1026/6280/2176/2168/2052/4067/3039/2936/140809/4780/10516/2876/11185/6556/445/5742/847/3240/2098/2353/26471/216/7779/11093/9963/241/10314/4259/3043/348/25841/2879/2878/8683/79813/596/4502/4504/1193/57016/4258/4193/23657/259/213/119391
BP	GO:0072526	pyridine-containing compound catabolic process	46	0.427395	2.07844	0.000517398	0.00719499	0.00541945	1069	tags=35%	list=14%	signal=30%	3479/2597/3939/6774/26137/9759/5230/5563/5315/7351/226/9611/57026/26471/5223/8671
BP	GO:0006949	syncytium formation	36	0.461164	2.1216	0.000525716	0.00729354	0.00549368	787	tags=39%	list=11%	signal=35%	963/11096/135228/9518/54209/3627/4756/8837/51177/7305/975/9644/79805/4627
BP	GO:0048145	regulation of fibroblast proliferation	55	0.40499	2.04192	0.000528928	0.00732096	0.00551433	1156	tags=36%	list=16%	signal=31%	581/3479/2099/6648/2950/1026/2335/5371/7472/2192/2495/4282/5156/57124/183/1602/1660/7474/26471/4921
BP	GO:0002922	positive regulation of humoral immune response	11	0.650126	2.03758	0.000536476	0.00739089	0.005567	720	tags=55%	list=10%	signal=49%	718/5788/2213/54209/3553/2208
BP	GO:0042325	regulation of phosphorylation	361	0.256571	1.58121	0.000535797	0.00739089	0.005567	2405	tags=43%	list=33%	signal=30%	50507/3479/7018/718/1116/5788/4318/6850/55024/10125/27250/142679/57761/11122/10457/6352/2950/1026/11006/7448/54209/2185/2335/9353/100133941/595/28984/5906/4067/64324/2534/2690/3301/51719/5795/6608/5329/5580/5168/7498/6091/2192/4908/8817/7189/4254/6547/2022/6789/4282/116496/5167/650/100506658/5997/26585/3553/8655/64943/11221/183/9344/56892/3486/57493/1981/7422/7474/23531/894/5899/2887/80243/25999/…
BP	GO:0006119	oxidative phosphorylation	85	0.360247	1.94466	0.000538473	0.00740119	0.00557476	3317	tags=76%	list=45%	signal=43%	1337/4710/93974/1340/440567/84701/1349/54205/26471/506/1537/4705/9555/51079/4713/514/7124/400916/125965/27089/4696/10632/9551/4698/4702/1329/509/11315/4700/1350/4714/4697/522/1347/1327/1345/1351/51142/539/54539/10975/9377/513/10476/4695/4694/4718/4715/4711/515/1339/29103/4716/126328/387/4708/4717/4712/84300/4726/7415/4706/55967/4709/4731
CC	GO:0001772	immunological synapse	31	0.47819	2.10515	0.000546078	0.00743595	0.00560095	1616	tags=52%	list=22%	signal=40%	3958/963/8631/11151/3001/490/84868/5795/5588/975/940/4627/916/5551/951/3932
BP	GO:0098883	synapse pruning	10	0.676511	2.06677	0.000544435	0.00743595	0.00560095	235	tags=50%	list=3%	signal=48%	718/713/3684/712/54209
BP	GO:1903844	regulation of cellular response to transforming growth factor beta stimulus	86	0.355643	1.92123	0.000547278	0.00743595	0.00560095	1422	tags=37%	list=19%	signal=30%	135228/8483/3309/3326/9518/6664/283149/4015/3303/8837/116844/8516/2022/650/55612/9315/25805/27122/51742/5654/23625/7043/80139/2201/11117/26036/9719/56937/7057/1028/58533/6498
BP	GO:0021700	developmental maturation	154	0.307623	1.79322	0.000546046	0.00743595	0.00560095	1486	tags=31%	list=20%	signal=25%	5880/3479/718/10365/4897/4313/51606/29842/26468/1026/712/2185/53335/5798/523/3202/7704/473/162466/11005/51201/23787/2034/5745/30812/359845/8642/650/4929/26585/55612/7422/7474/55737/4774/2624/558/1080/1050/2625/3745/1901/9296/64581/1028/631/596/26258
BP	GO:0008285	negative regulation of cell population proliferation	397	0.253213	1.56902	0.000544955	0.00743595	0.00560095	2256	tags=40%	list=31%	signal=30%	581/5743/50507/6774/23213/27250/5784/10457/135228/6441/6648/2950/6347/1026/11006/2213/414062/8519/5169/54209/2185/4332/6664/93974/28984/5270/4067/7704/9500/3303/84868/7481/2719/694/5795/5371/30008/6591/7498/6091/2192/5745/3489/8406/3488/2022/1051/2495/6789/7305/8654/6772/650/57007/26585/3553/55612/11221/3162/22809/9537/3486/7168/7356/1602/3611/7474/3490/6659/4000/4830/7043/2624/148/1805/26471/105…
BP	GO:0021535	cell migration in hindbrain	11	0.647332	2.02883	0.000559427	0.00758362	0.00571217	1059	tags=64%	list=14%	signal=55%	51176/482/473/54910/146057/2316/5362
BP	GO:0032890	regulation of organic acid transport	45	0.427083	2.06678	0.000566948	0.00766803	0.00577575	1495	tags=44%	list=20%	signal=36%	477/6850/2182/4282/5321/5997/3553/6558/2058/3552/134/6754/8792/5999/7057/4735/22925/151176/8864/8501
BP	GO:0034243	regulation of transcription elongation by RNA polymerase II	29	-0.351794	-2.51346	0.000570599	0.00769984	0.00579971	1992	tags=69%	list=27%	signal=51%	905/79577/3192/142/25896/25920/6837/9442/1025/643376/10614/55090/80237/9441/55837/57117/8312/51497/9862/55726
BP	GO:0031638	zymogen activation	21	0.53617	2.07746	0.00057235	0.00770591	0.00580428	1711	tags=62%	list=23%	signal=48%	4323/6281/5230/5270/5329/1512/861/3240/7056/7057/5327/5054/5328
BP	GO:0150077	regulation of neuroinflammatory response	26	0.497799	2.07436	0.00059033	0.00792997	0.00597305	2357	tags=69%	list=32%	signal=47%	5743/3479/5788/4318/4317/54209/747/9572/3553/26471/4314/26228/2896/3606/90865/7124/6376/6348
BP	GO:0006898	receptor-mediated endocytosis	142	0.310123	1.78657	0.000593715	0.00795739	0.0059937	3003	tags=60%	list=41%	signal=36%	3579/7018/718/187/6850/6441/3684/11006/7448/929/2213/9214/55576/4036/2690/1902/636/821/1191/4908/975/8685/6457/10894/57007/26585/3482/2208/4360/1803/10203/3676/2207/10266/7422/5899/55788/20/26052/348/22925/6401/347730/2209/567/57817/5054/4193/8862/2885/9779/9873/4983/54413/23149/2966/6453/79890/4599/284/634/3689/3690/284654/7430/4481/408/4600/3084/2890/1948/85439/1211/3688/4734/302/10188/8898/375…
MF	GO:0042056	chemoattractant activity	22	0.532169	2.11326	0.000597016	0.00796559	0.00599988	895	tags=45%	list=12%	signal=40%	3958/10457/6352/3627/3148/2277/4908/4282/7422/7474
BP	GO:0099024	plasma membrane invagination	31	0.474587	2.08929	0.000596175	0.00796559	0.00599988	2363	tags=68%	list=32%	signal=46%	718/51454/3684/2213/54209/246/2934/8685/84466/4627/2624/7057/3071/26228/2209/56907/112574/199/3689/26762/4481
BP	GO:0042267	natural killer cell mediated cytotoxicity	40	0.43497	2.04885	0.000599826	0.00796828	0.00600191	2195	tags=60%	list=30%	signal=42%	914/5052/8807/10125/11151/3821/387837/84868/10383/3635/4818/22914/3824/3823/4068/3593/135250/10870/2885/5873/634/3606/146850/5777
BP	GO:0043069	negative regulation of programmed cell death	483	0.243594	1.51736	0.000599908	0.00796828	0.00600191	1500	tags=27%	list=20%	signal=23%	3579/581/5743/3958/3479/4318/51176/51316/841/27250/9448/84236/2099/6352/7076/6648/5563/2950/6347/3309/3326/1026/70/9214/11151/54209/2185/2168/595/3148/1385/4036/2122/2534/3303/3301/8837/4780/4192/2876/960/6608/1410/5329/5580/301/1191/6591/4908/2274/627/30812/57144/4254/1051/2495/1512/9244/4282/5588/2729/56776/2296/4929/5599/57007/26585/10461/3553/3055/5314/940/3162/22809/3329/7351/56892/4255/6134…
BP	GO:0042116	macrophage activation	66	0.38465	1.99955	0.000617806	0.00818766	0.00616715	2240	tags=55%	list=30%	signal=38%	5788/6850/3684/712/4317/2213/54209/221395/84868/1191/4282/7305/4137/9572/5321/2208/6556/3329/7474/3459/1050/10062/7057/3929/26228/57817/199/728/2896/90865/3566/3689/7097/7098/7124/6376
BP	GO:0043277	apoptotic cell clearance	30	0.480487	2.08364	0.000633154	0.00837233	0.00630625	1298	tags=47%	list=18%	signal=39%	718/720/6347/54209/246/301/7305/8685/84466/10461/7052/558/10062/7057
BP	GO:0050482	arachidonate secretion	12	0.636203	2.04651	0.00064188	0.00843125	0.00635063	1629	tags=75%	list=22%	signal=59%	6850/301/1636/4282/5321/6754/22925/255189/5320
BP	GO:1903963	arachidonate transport	12	0.636203	2.04651	0.00064188	0.00843125	0.00635063	1629	tags=75%	list=22%	signal=59%	6850/301/1636/4282/5321/6754/22925/255189/5320
BP	GO:0033002	muscle cell proliferation	133	0.311062	1.7775	0.000639738	0.00843125	0.00635063	1342	tags=30%	list=18%	signal=25%	5743/3248/3479/4318/4313/27250/55810/6352/6648/1026/4209/8837/7472/30008/23414/2006/3488/6772/84466/650/2296/8840/3162/10203/3486/7168/861/6909/2353/7043/26011/9510/4208/3398/7520/4921/3776/348/7057/1901
MF	GO:0008134	transcription factor binding	284	0.26422	1.60442	0.000645701	0.00846269	0.00637431	1478	tags=29%	list=20%	signal=24%	51176/6774/8553/1063/11122/10783/84181/55646/9759/27063/2099/5579/53335/5798/2295/3148/1385/7704/64324/4209/6996/8648/3301/64320/9320/4780/2034/8463/2274/23414/1386/30812/64321/6789/6772/9572/6672/2288/55689/2296/4929/2958/51602/57649/861/6909/2316/9611/811/1660/7067/29841/84146/2353/6943/23625/862/6605/4774/2624/4208/85004/3398/1050/80139/23613/2625/5396/4792/4212/7391/4005/6939/10589/8543/947/6…
BP	GO:0050790	regulation of catalytic activity	463	0.244344	1.5202	0.000664019	0.00868355	0.00654067	1420	tags=26%	list=19%	signal=23%	50507/3479/2597/1116/5788/5341/121512/6774/10125/27250/9448/142679/57761/11122/2099/6352/6281/6271/7076/2950/1026/3684/11006/7448/54209/2185/8477/3001/10297/93974/185/100133941/595/28984/2778/5906/5270/4067/5273/2245/8874/2690/3303/3301/51719/5795/5580/6091/4908/9712/8817/6000/10010/7189/2717/6547/1893/7538/1512/1476/23637/650/116985/92154/5599/5997/3553/2208/7052/64943/11221/183/9344/871/85397/5…
BP	GO:0045730	respiratory burst	27	0.493922	2.08559	0.000667973	0.00869686	0.00655069	2186	tags=67%	list=30%	signal=47%	5880/6280/54209/100133941/1604/3055/11221/6556/10811/1535/64581/3929/3512/7001/1536/2896/653361/5294
CC	GO:0098644	complex of collagen trimers	15	0.588536	2.03408	0.000667687	0.00869686	0.00655069	816	tags=53%	list=11%	signal=48%	1281/1295/1286/1277/1278/1284/1282/85301
BP	GO:0051384	response to glucocorticoid	68	0.370976	1.93769	0.000672323	0.0087343	0.0065789	1186	tags=35%	list=16%	signal=30%	5743/2706/1026/9353/3158/249/2690/2354/8837/301/1636/7538/3557/7351/445/7356/6909/3490/2353/1036/677/3485/6754/10018
BP	GO:0030178	negative regulation of Wnt signaling pathway	86	0.352481	1.90415	0.000678248	0.00879199	0.00662235	1307	tags=36%	list=18%	signal=30%	10297/1000/55593/7481/2719/4192/6591/3489/64321/6789/650/387914/26585/55612/9580/388630/2308/7474/85407/27122/3487/79960/2887/27303/1454/3090/3485/4038/7090/348/1958
BP	GO:0070670	response to interleukin-4	26	0.493098	2.05476	0.000682727	0.00879234	0.00662261	2718	tags=77%	list=37%	signal=49%	5788/51176/3309/3326/11151/5371/4360/4783/6932/11093/2625/285180/81501/4435/2194/3566/6122/146722/1019/6175
BP	GO:0010562	positive regulation of phosphorus metabolic process	262	0.273843	1.65697	0.000682336	0.00879234	0.00662261	1696	tags=32%	list=23%	signal=25%	50507/3479/7018/718/1116/5788/4318/5341/6850/55024/10125/26137/142679/2181/10457/6352/5563/1026/7448/54209/2185/221395/100133941/595/28984/5906/4067/2690/51719/5795/5329/5580/5168/6091/4908/8817/5745/7189/4254/6789/4282/116496/650/26585/3553/9344/56892/1981/7422/7474/23531/894/5899/2887/4208/25999/8671/10006/7520/3357/55600/25778/4921/8792/8995/4038/7057/8543/5770/56005/55704/28232/51744/90/4504/…
BP	GO:0045937	positive regulation of phosphate metabolic process	262	0.273843	1.65697	0.000682336	0.00879234	0.00662261	1696	tags=32%	list=23%	signal=25%	50507/3479/7018/718/1116/5788/4318/5341/6850/55024/10125/26137/142679/2181/10457/6352/5563/1026/7448/54209/2185/221395/100133941/595/28984/5906/4067/2690/51719/5795/5329/5580/5168/6091/4908/8817/5745/7189/4254/6789/4282/116496/650/26585/3553/9344/56892/1981/7422/7474/23531/894/5899/2887/4208/25999/8671/10006/7520/3357/55600/25778/4921/8792/8995/4038/7057/8543/5770/56005/55704/28232/51744/90/4504/…
BP	GO:0002825	regulation of T-helper 1 type immune response	20	0.543277	2.06174	0.000693427	0.00887227	0.00668282	2405	tags=80%	list=33%	signal=54%	84868/301/5321/3553/6556/3554/3142/8809/10865/30009/3593/729230/3606/90865/3566/941
BP	GO:0002286	T cell activation involved in immune response	75	0.369813	1.95247	0.000693262	0.00887227	0.00668282	2583	tags=59%	list=35%	signal=39%	3958/51176/6774/29851/338339/2213/969/54209/6775/80031/84868/3956/4192/301/3936/7305/975/6556/2207/2625/3142/54518/8995/8809/3071/6693/30009/3593/942/5873/50943/634/3606/3566/3570/5361/64218/3683/26253/941/3383/9021/64332/3726
BP	GO:0001890	placenta development	81	0.362679	1.93846	0.000693262	0.00887227	0.00668282	2278	tags=53%	list=31%	signal=37%	5743/51176/841/2706/3326/55224/8648/2034/1508/7472/1051/6789/79805/56977/2186/5654/2624/677/1050/2201/8728/6692/9191/1028/653/6615/58495/100/3976/2057/2885/4435/29072/6768/3491/1437/4693/4853/5764/84870/22846/150921/3880
BP	GO:0043931	ossification involved in bone maturation	13	0.623289	2.06327	0.000699549	0.00890702	0.00670899	705	tags=54%	list=10%	signal=49%	3479/7704/162466/359845/8642/650/26585
BP	GO:0070977	bone maturation	14	0.591701	2.0178	0.000697934	0.00890702	0.00670899	705	tags=50%	list=10%	signal=45%	3479/7704/162466/359845/8642/650/26585
BP	GO:0055082	intracellular chemical homeostasis	342	0.255441	1.569	0.000700654	0.00890702	0.00670899	1723	tags=31%	list=23%	signal=25%	581/50507/477/7018/7447/187/5788/26137/8804/309/51606/7222/6352/1215/481/6648/5563/2950/5579/6354/482/11151/54209/3627/2185/79689/4756/5798/523/4067/490/84286/760/9885/8609/1277/5371/2876/5745/10568/6547/1636/2495/2729/9472/9572/5167/7052/5314/6556/3162/7351/7178/1729/2308/2316/811/23236/7474/6558/6659/783/10539/506/1080/3552/7779/8671/134/26504/252839/3357/80762/7391/83959/3170/94101/20/3745/533…
BP	GO:0071559	response to transforming growth factor beta	172	0.298407	1.75312	0.00070276	0.00891467	0.00671475	1583	tags=33%	list=21%	signal=27%	3248/6774/27063/135228/8483/3309/1281/3326/9518/6664/2534/283149/4015/3303/55553/8837/1277/1278/5371/116844/7472/1284/8516/2022/10631/4053/650/55612/9315/25805/4054/3694/7474/27122/51742/2353/5654/23625/7043/677/4208/80139/2201/11117/26036/2331/9719/4921/56937/7057/59/1028/58533/6498/90/58495/81501
BP	GO:0007179	transforming growth factor beta receptor signaling pathway	123	0.323418	1.8331	0.000704879	0.00892244	0.00672061	1551	tags=35%	list=21%	signal=28%	3248/6774/135228/8483/3309/1281/3326/9518/6664/283149/4015/3303/1278/5371/116844/8516/2022/4053/650/55612/9315/25805/4054/3694/27122/51742/2353/5654/23625/7043/80139/2201/11117/26036/2331/9719/56937/7057/1028/58533/6498/90/58495
BP	GO:0032310	prostaglandin secretion	11	0.640522	2.00748	0.000709228	0.0089482	0.00674001	1164	tags=64%	list=16%	signal=54%	5743/2182/4282/5321/3553/3552/8792
BP	GO:0002698	negative regulation of immune effector process	84	0.341865	1.83724	0.000709935	0.0089482	0.00674001	2405	tags=52%	list=33%	signal=36%	3958/5788/8993/8832/11006/2213/969/5169/3821/10225/11005/387837/84868/3956/301/966/1604/11221/7043/558/3635/80762/3142/8995/6688/3071/6693/3824/30009/2885/50943/284/383/729230/634/2896/90865/3566/5777/7124/7291/2/196/941
CC	GO:0000313	organellar ribosome	35	-0.318025	-2.47568	0.000727814	0.00913468	0.00688047	4428	tags=94%	list=60%	signal=38%	122704/64979/9553/116541/51263/64951/51264/63931/64968/55052/54998/26589/29074/28977/64975/84545/64928/116540/51258/64981/64960/219927/63875/118487/29088/64965/65080/130916/51116/64969/64949/64978/11222
CC	GO:0005761	mitochondrial ribosome	35	-0.318025	-2.47568	0.000727814	0.00913468	0.00688047	4428	tags=94%	list=60%	signal=38%	122704/64979/9553/116541/51263/64951/51264/63931/64968/55052/54998/26589/29074/28977/64975/84545/64928/116540/51258/64981/64960/219927/63875/118487/29088/64965/65080/130916/51116/64969/64949/64978/11222
BP	GO:0048469	cell maturation	75	0.368912	1.94772	0.00073099	0.00915515	0.00689589	1478	tags=36%	list=20%	signal=29%	5880/718/10365/4897/29842/26468/1026/712/2185/53335/3202/23787/2034/5745/30812/4929/7422/2624/558/1080/1050/2625/3745/64581/1028/631/596
BP	GO:0050920	regulation of chemotaxis	116	0.327847	1.83848	0.000733258	0.00916417	0.00690269	895	tags=28%	list=12%	signal=25%	5880/3579/7941/6352/1435/6347/719/6354/54209/3627/2185/9353/7852/4067/27202/1902/284340/5795/4192/2358/2277/6091/4908/8817/100532736/4282/5156/26585/1803/811/7422/7474
BP	GO:1902903	regulation of supramolecular fiber organization	222	0.278827	1.6692	0.000738026	0.00920435	0.00693295	2242	tags=43%	list=30%	signal=31%	1490/5341/9535/3312/6281/71/11151/54209/246/2185/9353/8477/10297/26999/28984/8874/1902/84952/3303/81553/10435/4133/5063/2876/2934/30008/1410/5580/1191/129446/2006/146057/51466/4137/120/2288/100506658/116985/3055/10109/7168/3925/2316/961/6709/5962/57026/7043/25999/79709/11117/7408/10565/5999/8440/348/57580/5202/7429/11034/6385/1901/22919/90102/55704/157922/10787/55142/221074/3071/7454/84722/89927/…
BP	GO:0045926	negative regulation of growth	119	0.326527	1.83869	0.000743229	0.00924976	0.00696715	1699	tags=38%	list=23%	signal=30%	11007/51316/2273/1026/9518/9353/221476/53335/2778/5270/80031/3303/4133/2719/694/5795/5371/1410/56981/64321/3488/6789/5167/5997/26585/11221/6494/7474/79960/5802/7490/85004/3300/5999/3776/57142/596/2487/344901/4502/4504/81501/84722/3624/10500
BP	GO:0061035	regulation of cartilage development	47	0.411982	2.01444	0.000747918	0.00928861	0.00699642	945	tags=36%	list=13%	signal=32%	1490/7704/55553/7481/4192/6591/4017/8817/2202/359845/650/26585/8840/129642/4054/7474/649
BP	GO:0071219	cellular response to molecule of bacterial origin	141	0.30895	1.77959	0.000750195	0.00929739	0.00700303	2240	tags=46%	list=30%	signal=33%	5743/4318/27250/57048/27063/7431/2950/6347/4317/929/2213/54209/3627/3148/3158/4067/3032/84868/7189/7538/4282/10417/9572/1604/5599/3553/3055/4360/140885/445/56300/7474/4208/558/3552/11093/4792/10062/3929/10865/4314/22914/26228/567/5054/3593/942/3394/23097/6372/10318/51571/7001/1910/820/834/1234/1437/3606/5724/5777/949/7097/7124/6376
BP	GO:1902532	negative regulation of intracellular signal transduction	365	0.255775	1.57674	0.000755606	0.00934491	0.00703882	1561	tags=28%	list=21%	signal=24%	5743/187/5788/4318/5341/55024/841/27250/338382/220441/142679/3312/2099/8483/6648/5563/2950/3309/9518/11006/54209/23612/9353/5270/4067/5048/2122/25862/2534/1902/84952/4015/3303/3301/56603/4780/5795/2876/960/5329/5580/1191/6591/7498/2192/2274/10868/10010/112464/2022/440730/4282/57556/6772/9572/57007/5997/26585/3553/11221/5314/183/140885/467/7178/3925/2308/57493/9611/4544/1827/811/6943/23625/81926/9…
BP	GO:0030308	negative regulation of cell growth	89	0.351613	1.91056	0.000761666	0.00939931	0.0070798	2493	tags=55%	list=34%	signal=37%	11007/2273/1026/9353/221476/53335/5270/80031/3303/4133/694/5795/5371/1410/56981/64321/5167/5997/26585/6494/7474/79960/5802/7490/85004/3300/5999/57142/596/2487/344901/4504/81501/84722/3624/10500/9037/29948/3304/92304/2539/55384/6405/1031/83667/56920/6595/9423/2661
BP	GO:0019220	regulation of phosphate metabolic process	428	0.249862	1.55112	0.000764765	0.00939931	0.0070798	1418	tags=26%	list=19%	signal=22%	50507/3479/7018/718/1116/5788/4318/5341/6850/6774/55024/10125/27250/26137/142679/2181/57761/11122/9759/10457/6352/5230/5563/2950/1026/11006/7448/54209/2185/221395/2335/9353/93974/100133941/595/28984/5906/4067/64324/2534/2690/3301/51719/5795/130013/6608/5329/5580/5168/7498/6091/2192/4908/8817/5745/7189/4254/6547/2022/6789/4282/116496/5167/650/100506658/5997/26585/3553/8655/64943/11221/183/9344/568…
BP	GO:0051174	regulation of phosphorus metabolic process	428	0.249862	1.55112	0.000764765	0.00939931	0.0070798	1418	tags=26%	list=19%	signal=22%	50507/3479/7018/718/1116/5788/4318/5341/6850/6774/55024/10125/27250/26137/142679/2181/57761/11122/9759/10457/6352/5230/5563/2950/1026/11006/7448/54209/2185/221395/2335/9353/93974/100133941/595/28984/5906/4067/64324/2534/2690/3301/51719/5795/130013/6608/5329/5580/5168/7498/6091/2192/4908/8817/5745/7189/4254/6547/2022/6789/4282/116496/5167/650/100506658/5997/26585/3553/8655/64943/11221/183/9344/568…
BP	GO:0033599	regulation of mammary gland epithelial cell proliferation	12	0.629866	2.02612	0.000766844	0.00940535	0.00708435	1398	tags=67%	list=19%	signal=54%	581/595/3202/2876/6091/80139/2625/57142
BP	GO:0032814	regulation of natural killer cell activation	19	0.542922	2.03137	0.000769309	0.00941609	0.00709243	2160	tags=74%	list=29%	signal=52%	8993/10125/3821/84868/7305/558/26258/116449/3824/3823/3593/2268/3600/3606
MF	GO:0005509	calcium ion binding	336	0.257485	1.58033	0.000783083	0.00956491	0.00720453	1313	tags=27%	list=18%	signal=23%	7447/6402/10125/23213/57048/309/57758/5638/4321/6281/6271/2706/3309/26/6280/6279/2015/1606/5169/9353/80274/3697/55576/55959/4036/1009/1000/120114/5954/249/821/1002/8404/25975/10516/2934/30008/301/4017/5168/2192/3936/23499/2202/83872/80727/4053/133584/57124/8642/5167/5321/7052/79056/84812/84206/28316/140576/7178/861/57493/811/60681/23236/4054/6709/7056/85407/649/51199/5358/2201/51661/5066/11093/25…
BP	GO:0085029	extracellular matrix assembly	34	0.456597	2.079	0.000793576	0.00966601	0.00728068	1393	tags=47%	list=19%	signal=38%	1281/28984/4015/1278/10516/30008/2006/183/4239/10266/60681/84168/11117/5768/4629/90102
BP	GO:0010038	response to metal ion	170	0.300052	1.75904	0.000794623	0.00966601	0.00728068	1721	tags=36%	list=23%	signal=28%	5743/477/7018/841/7222/6648/5563/9456/6279/929/246/2185/1396/3158/1385/2354/79800/4780/4017/2729/4137/6556/3162/7351/10628/445/140576/847/811/1800/7474/6558/2353/7412/4208/3552/1050/5066/113/7779/7139/11093/3707/3756/241/7273/3745/2937/6263/7057/596/955/4502/4504/567/3815/3777/57817/114/4193/4884
BP	GO:0001933	negative regulation of protein phosphorylation	117	0.322278	1.81047	0.000798624	0.00969477	0.00730234	1416	tags=32%	list=19%	signal=27%	5788/27250/142679/57761/11122/2950/1026/11006/9353/4067/3301/5795/6608/5580/7498/2192/4908/6547/116496/5167/100506658/5997/3553/64943/11221/183/3486/57493/1981/80243/64853/26146/348/57580/9555/1028/5770/58533
BP	GO:0034109	homotypic cell-cell adhesion	59	0.38679	1.97095	0.000804463	0.00973975	0.00733622	2276	tags=56%	list=31%	signal=39%	5341/6850/6352/71/2778/5270/4067/5329/5580/2717/5156/5588/84466/4627/2316/3611/5962/80139/11117/3043/10398/60/23657/239/634/83706/3570/3690/5294/5777/6532/1829/1832
BP	GO:0032355	response to estradiol	67	0.368669	1.92239	0.000805617	0.00973975	0.00733622	1349	tags=34%	list=18%	signal=28%	5743/3248/4313/6774/841/2099/2706/3684/2690/8648/8837/1277/2876/1410/10631/10628/445/847/811/80139/3485/3015/2879
BP	GO:1905521	regulation of macrophage migration	32	0.463943	2.07227	0.000810406	0.00977768	0.0073648	2357	tags=66%	list=32%	signal=45%	4323/6352/1435/719/54209/2185/284340/5795/4192/4282/975/11117/8995/7057/57142/26228/728/729230/1436/6376/6348
BP	GO:0046031	ADP metabolic process	48	0.411984	2.01761	0.000812904	0.0097879	0.00737249	1069	tags=33%	list=14%	signal=29%	3479/2597/3939/6774/26137/9759/5230/5563/203/5315/7351/226/9611/26471/5223/8671
MF	GO:0005126	cytokine receptor binding	132	0.319598	1.82462	0.000814628	0.00978875	0.00737313	2294	tags=50%	list=31%	signal=35%	6850/841/6352/1435/6347/6354/414062/3627/8837/116844/2277/4908/7189/627/4254/2022/1893/9244/4282/6772/6364/3557/26585/3553/9547/25805/7422/56300/7043/3552/2625/7188/8995/10763/55704/58533/6367/26228/10148/3593/3976/6372/2885/8737/7187/4087/3977/9180/8743/101/729230/1437/51752/3600/3606/90865/3570/3690/5008/7124/6357/6376/2921/1003/8742/8741
BP	GO:0016049	cell growth	242	0.27675	1.66627	0.000828876	0.0099398	0.00748691	2292	tags=43%	list=31%	signal=31%	11007/3479/4323/4897/2273/65059/1026/6280/6279/8828/2185/2335/9353/8470/221476/26999/53335/185/7852/5270/5048/80031/3303/2182/1002/4133/694/5795/5371/3371/1410/56981/627/23499/57144/64321/3488/10631/5588/9472/4137/5167/5997/26585/60676/183/9344/3486/6494/3676/1981/7422/7474/3490/3487/79960/148/10276/51199/5802/7490/85004/3300/10611/5999/9576/348/8128/57142/596/2487/221074/344901/4504/81501/84722/…
BP	GO:1904407	positive regulation of nitric oxide metabolic process	29	0.468013	2.00871	0.000834837	0.00999105	0.00752551	2216	tags=62%	list=30%	signal=44%	5743/10365/2099/6648/3326/2185/1191/3553/3320/445/3043/348/64581/22914/4988/23576/3689/7124
MF	GO:0000987	cis-regulatory region sequence-specific DNA binding	400	0.249508	1.54618	0.000838035	0.0100091	0.00753911	1574	tags=28%	list=21%	signal=24%	51176/10365/6774/8553/26137/26298/29842/60468/55810/9759/11317/2099/6671/6775/6304/53335/6664/55509/2295/3148/3202/1385/7704/64324/2122/4209/2354/4784/55553/4862/79800/8609/4780/2034/8463/6591/4807/2104/1386/56981/30812/3215/64321/171017/1051/2115/6772/9572/9970/55311/1052/2296/4929/4783/4603/9496/9580/467/861/1602/6909/2308/1660/7067/29841/2186/84146/83439/1628/26959/2353/6943/55749/6659/2004/10…
BP	GO:0032609	type II interferon production	68	0.367314	1.91856	0.000841577	0.010011	0.00754057	2216	tags=53%	list=30%	signal=37%	914/8993/11006/929/10225/84868/3553/6556/140885/3329/7356/961/7474/3554/558/2625/8809/64581/10865/51744/916/22914/3595/7294/10148/3624/3593/3394/1649/51571/50943/729230/3606/90865/7098/7124
BP	GO:0032649	regulation of type II interferon production	68	0.367314	1.91856	0.000841577	0.010011	0.00754057	2216	tags=53%	list=30%	signal=37%	914/8993/11006/929/10225/84868/3553/6556/140885/3329/7356/961/7474/3554/558/2625/8809/64581/10865/51744/916/22914/3595/7294/10148/3624/3593/3394/1649/51571/50943/729230/3606/90865/7098/7124
BP	GO:0071353	cellular response to interleukin-4	24	0.510699	2.09975	0.000848703	0.0100756	0.00758918	2718	tags=79%	list=37%	signal=50%	5788/51176/3309/3326/11151/5371/4360/4783/6932/11093/2625/285180/81501/2194/3566/6122/146722/1019/6175
BP	GO:0048660	regulation of smooth muscle cell proliferation	94	0.341804	1.87115	0.000850784	0.0100801	0.00759258	1342	tags=32%	list=18%	signal=26%	5743/3248/3479/4318/4313/27250/55810/6352/6648/1026/4209/30008/2006/3488/6772/650/8840/3162/10203/3486/7168/7043/9510/4208/3398/7520/4921/348/7057/1901
MF	GO:0061135	endopeptidase regulator activity	88	0.338818	1.83518	0.000856867	0.0101319	0.0076316	1332	tags=33%	list=18%	signal=27%	2597/718/6590/12/135228/720/7076/3697/5858/5270/5273/7035/11005/51377/10213/1476/183/871/3329/56925/7078/5269/6692/9491/20/80760/7057/140686/51079
BP	GO:0006749	glutathione metabolic process	29	0.466564	2.00249	0.000865194	0.0101897	0.00767512	1768	tags=55%	list=24%	signal=42%	51022/6648/2950/2936/4780/2876/2729/2949/1800/2940/2937/6506/2939/4258/23657/119391
BP	GO:0002861	regulation of inflammatory response to antigenic stimulus	29	0.46639	2.00175	0.000865194	0.0101897	0.00767512	1668	tags=52%	list=23%	signal=40%	718/6850/2213/54209/2778/4067/2534/2876/975/3055/940/10769/6693/2209/3593
BP	GO:0033032	regulation of myeloid cell apoptotic process	18	0.540512	1.99559	0.000869842	0.0102241	0.00770104	1723	tags=61%	list=23%	signal=47%	3579/6352/301/6591/4254/4282/7067/4208/3707/596/23657
BP	GO:2000379	positive regulation of reactive oxygen species metabolic process	46	0.417488	2.03026	0.000884887	0.0103803	0.00781873	1820	tags=50%	list=25%	signal=38%	6850/6648/2950/1026/3684/57126/2185/185/4780/2358/5580/7498/7305/4137/183/140885/7057/1535/64581/2885/1994/8737/5873
BP	GO:0061572	actin filament bundle organization	94	0.340796	1.86564	0.000887976	0.010396	0.00783052	1486	tags=36%	list=20%	signal=29%	1490/5341/6281/71/2185/8477/28984/1902/84952/221061/2006/3936/51466/359845/56776/116985/7168/3925/2316/961/5962/57026/7043/5358/7429/6385/1901/80774/800/10398/90102/55704/8452/26258
BP	GO:0090303	positive regulation of wound healing	39	0.431357	2.02357	0.000893369	0.0104179	0.00784706	1750	tags=51%	list=24%	signal=39%	7448/71/7852/4780/301/100506658/8840/55612/7056/11117/4638/10565/4921/7391/7057/64581/5327/5054/5328/130120
BP	GO:0043066	negative regulation of apoptotic process	466	0.244588	1.52141	0.000892988	0.0104179	0.00784706	1500	tags=27%	list=20%	signal=23%	3579/581/5743/3958/3479/4318/51176/51316/27250/9448/84236/2099/6352/7076/6648/5563/2950/6347/3309/3326/1026/70/9214/11151/54209/2185/2168/595/3148/1385/4036/2534/3303/3301/8837/4780/4192/2876/960/6608/1410/5329/5580/301/1191/6591/4908/2274/627/30812/57144/4254/1051/1512/9244/4282/5588/2729/56776/2296/4929/5599/57007/26585/10461/3553/3055/5314/940/3162/22809/3329/7351/56892/4255/6134/5763/7178/230…
BP	GO:0043409	negative regulation of MAPK cascade	79	0.360105	1.9198	0.000898917	0.010462	0.00788028	2270	tags=52%	list=31%	signal=36%	5788/27250/142679/2950/11006/54209/4067/5048/2122/3301/5795/5580/2192/57556/5997/3553/11221/183/140885/467/2308/9611/11117/64853/284996/348/5770/1844/3976/259/55872/10318/151649/401265/153769/1846/1445/5777/10253/81848/7430
BP	GO:0001706	endoderm formation	40	0.427784	2.015	0.000911924	0.0105731	0.0079639	2179	tags=57%	list=30%	signal=41%	4323/4318/4313/4317/7448/2335/1295/1284/23168/64321/3914/4627/3676/8019/9555/1844/3624/2885/29072/4087/1846/3689/9241
BP	GO:0032526	response to retinoic acid	57	0.386631	1.95595	0.000912026	0.0105731	0.0079639	1366	tags=39%	list=19%	signal=32%	4313/2706/2185/1385/4067/8648/56603/7481/1277/3371/7472/8463/340485/1512/6672/3482/6909/7474/3490/3485/51079/9227
BP	GO:0016073	snRNA metabolic process	13	-0.526802	-2.35631	0.000920552	0.0106511	0.00802266	1744	tags=77%	list=24%	signal=59%	25896/6621/23404/80237/84524/54862/57117/56257/55726/79650
BP	GO:0045088	regulation of innate immune response	249	0.275756	1.66234	0.000929623	0.0107142	0.00807018	2216	tags=42%	list=30%	signal=31%	6850/8807/10125/841/338382/55646/10621/3312/2099/6352/4321/6280/6279/285852/929/2213/54209/92747/3821/10225/4332/3148/4067/1374/2534/9470/3303/387837/84868/3075/57590/5063/4780/2358/7189/7305/9572/9261/92610/5599/3055/11221/3320/3329/6421/9865/81622/1660/839/7474/81926/5802/7105/3635/9641/64170/7520/4792/10062/348/25939/1535/64581/5770/57142/3929/6688/26058/22914/116449/3824/7294/3823/4068/3593/1…
MF	GO:0000981	DNA-binding transcription factor activity RNA polymerase II-specific	436	0.244273	1.51711	0.000929623	0.0107142	0.00807018	2094	tags=37%	list=28%	signal=28%	51176/10365/6774/8553/26137/26298/29842/60468/55810/11317/26468/2099/6671/440077/6775/6304/53335/6664/55509/2295/3202/1385/7704/2122/4209/2354/4784/55553/4862/79800/8609/4780/2034/8463/6591/4807/2104/1386/30812/3215/64321/171017/1051/2115/6772/9572/9970/6672/55311/1052/2296/4929/197320/4783/4603/9496/9580/22809/467/861/1602/6909/2308/7067/29841/84146/83439/1628/26959/2353/6943/6659/2004/10608/477…
BP	GO:0141060	disruption of anatomical structure in another organism	43	0.412996	1.98382	0.000933241	0.0107262	0.00807926	2286	tags=58%	list=31%	signal=40%	3958/2597/8993/729/3627/2920/3001/6364/9547/4069/730/733/6361/6367/4818/5551/3004/5320/57817/6372/6338/383/820/6357/2921
BP	GO:0071222	cellular response to lipopolysaccharide	134	0.310322	1.77467	0.00093429	0.0107262	0.00807926	2240	tags=46%	list=30%	signal=33%	5743/4318/27250/57048/27063/7431/2950/6347/4317/929/3627/3148/3158/4067/3032/84868/7189/7538/4282/10417/9572/1604/5599/3553/3055/4360/140885/445/56300/7474/4208/558/3552/11093/4792/10062/3929/10865/4314/22914/26228/567/5054/3593/942/3394/23097/6372/10318/7001/1910/820/834/1234/1437/3606/5724/5777/949/7097/7124/6376
BP	GO:0045429	positive regulation of nitric oxide biosynthetic process	28	0.484764	2.07088	0.000938098	0.0107491	0.00809651	2216	tags=64%	list=30%	signal=45%	5743/10365/2099/6648/3326/2185/1191/3553/3320/445/3043/348/64581/22914/4988/23576/3689/7124
BP	GO:0019730	antimicrobial humoral response	65	0.37919	1.96784	0.000946952	0.0108296	0.00815714	1750	tags=43%	list=24%	signal=33%	3958/2597/7018/6590/8993/6352/6347/6280/6354/414062/3627/2920/11005/10417/6364/6556/9547/4069/51297/140686/6361/6367/5657/3512/567/57817/6372/130120
BP	GO:1902950	regulation of dendritic spine maintenance	10	0.658547	2.01189	0.000952292	0.0108697	0.00818733	1274	tags=70%	list=17%	signal=58%	9456/2213/51104/2534/55737/23613/348
BP	GO:0014743	regulation of muscle hypertrophy	33	0.458717	2.07143	0.000959558	0.0109214	0.00822624	1177	tags=42%	list=16%	signal=36%	3479/7222/221476/3488/9472/8654/5997/183/2308/4000/10539/148/29995/5999
BP	GO:1903034	regulation of response to wounding	98	0.330967	1.81576	0.000960505	0.0109214	0.00822624	1400	tags=35%	list=19%	signal=28%	6774/135228/7448/71/4756/7852/5270/7035/51330/4780/4192/5329/5580/301/5156/100506658/8840/55612/2316/7056/6558/5802/11117/4638/10565/4921/7391/3170/348/7057/7429/64581/90102/5327
BP	GO:1990874	vascular associated smooth muscle cell proliferation	51	0.399563	1.98059	0.000966825	0.0109368	0.0082379	1156	tags=33%	list=16%	signal=28%	3248/3479/4318/4313/27250/55810/6648/1026/4209/30008/3488/10203/7168/7043/9510/4208/4921
BP	GO:0141091	transforming growth factor beta receptor superfamily signaling pathway	193	0.283085	1.6793	0.000967405	0.0109368	0.0082379	1551	tags=31%	list=21%	signal=25%	3248/51176/6774/23213/27250/135228/8483/3309/1281/3326/9518/4756/6664/4036/283149/4015/3303/2719/1278/5371/116844/1386/100532736/8516/2022/4053/650/26585/55612/9315/25805/3611/4054/3694/7474/27122/51742/2353/5654/23625/4774/7043/60436/80139/2201/11117/26036/2331/9719/56937/7057/1958/1028/64388/653/58533/6498/90/151556/58495
MF	GO:0003700	DNA-binding transcription factor activity	455	0.241219	1.50003	0.000966438	0.0109368	0.0082379	2094	tags=36%	list=28%	signal=28%	51176/10365/6774/8553/26137/26298/29842/60468/55810/11317/26468/2099/6671/440077/6775/6304/53335/6664/55509/2295/3202/1385/7704/2122/4209/2354/4784/55553/4862/79800/8609/4780/2034/8463/6591/4807/2104/1386/56981/30812/3215/64321/171017/1051/2115/6772/9572/9970/6672/55311/1052/2296/4929/197320/4783/4603/9496/9580/22809/467/861/1602/6909/2308/7067/56977/29841/84146/83439/1628/26959/2353/6943/6659/20…
MF	GO:0001968	fibronectin binding	27	0.485361	2.04944	0.000984108	0.0111045	0.00836417	1317	tags=48%	list=18%	signal=40%	4313/11006/4237/2192/151887/3489/3488/3486/3676/7422/51144/7057/6385
BP	GO:0035150	regulation of tube size	81	0.359064	1.91914	0.000995272	0.0111667	0.008411	1486	tags=36%	list=20%	signal=29%	5743/477/10365/4313/2982/147/6648/185/490/2876/1636/2729/120/2296/5997/183/7873/3676/4544/7422/148/143872/134/3357/3043/348/59/8864/26258
BP	GO:0035296	regulation of tube diameter	81	0.359064	1.91914	0.000995272	0.0111667	0.008411	1486	tags=36%	list=20%	signal=29%	5743/477/10365/4313/2982/147/6648/185/490/2876/1636/2729/120/2296/5997/183/7873/3676/4544/7422/148/143872/134/3357/3043/348/59/8864/26258
BP	GO:0097746	blood vessel diameter maintenance	81	0.359064	1.91914	0.000995272	0.0111667	0.008411	1486	tags=36%	list=20%	signal=29%	5743/477/10365/4313/2982/147/6648/185/490/2876/1636/2729/120/2296/5997/183/7873/3676/4544/7422/148/143872/134/3357/3043/348/59/8864/26258
BP	GO:0120039	plasma membrane bounded cell projection morphogenesis	341	0.25352	1.55718	0.00100325	0.0112349	0.00846243	2459	tags=45%	list=33%	signal=31%	4897/9448/84189/65059/57689/71/8828/2335/9353/4756/26999/53335/7852/1385/547/4036/5048/1009/2534/80031/8874/473/1272/3996/1002/10678/54910/8609/4133/5063/5795/960/6608/23114/5168/6091/4908/51177/627/23499/100532736/2717/10631/223117/51466/5588/57556/2115/4137/4929/6616/1947/9344/6383/23363/3925/3676/1627/7422/7474/5789/11202/51199/80243/5802/3251/7779/10006/2625/7408/59352/10611/4038/26012/84628/…
CC	GO:0000315	organellar large ribosomal subunit	23	-0.400816	-2.40068	0.00100895	0.011235	0.0084625	4428	tags=100%	list=60%	signal=40%	64979/9553/116541/51263/51264/55052/26589/29074/28977/64975/84545/64928/116540/51258/64981/219927/63875/29088/65080/130916/64978/11222
CC	GO:0005762	mitochondrial large ribosomal subunit	23	-0.400816	-2.40068	0.00100895	0.011235	0.0084625	4428	tags=100%	list=60%	signal=40%	64979/9553/116541/51263/51264/55052/26589/29074/28977/64975/84545/64928/116540/51258/64981/219927/63875/29088/65080/130916/64978/11222
BP	GO:0035051	cardiocyte differentiation	88	0.336486	1.82255	0.00100698	0.011235	0.0084625	1182	tags=32%	list=16%	signal=27%	50507/3479/27250/70/8470/221476/55553/9215/2274/64321/5156/9472/650/5997/26585/23363/6909/811/7422/4000/148/7412/26011/4208/7490/10611/5999/7273
BP	GO:0032330	regulation of chondrocyte differentiation	35	0.442849	2.03155	0.00101387	0.0112686	0.00848776	880	tags=37%	list=12%	signal=33%	1490/7704/55553/4192/6591/4017/8817/2202/359845/26585/8840/129642/4054
BP	GO:0016264	gap junction assembly	11	0.630845	1.97715	0.00102059	0.0113009	0.00851212	734	tags=55%	list=10%	signal=49%	187/2706/10052/1636/3553/183
BP	GO:0072132	mesenchyme morphogenesis	43	0.411516	1.9767	0.00102047	0.0113009	0.00851212	1523	tags=42%	list=21%	signal=33%	72/187/51176/11096/70/7481/6591/6091/2022/8642/650/2296/6909/7474/59/653/6615/90
BP	GO:0006968	cellular defense response	30	0.468012	2.02954	0.00102823	0.0113431	0.00854393	2467	tags=70%	list=33%	signal=47%	3579/4046/9214/2185/4332/7305/8808/3929/5551/6693/10219/3823/4068/7707/728/729230/1234/90865/653361/3959/8061
BP	GO:0048705	skeletal system morphogenesis	124	0.314276	1.78388	0.00102679	0.0113431	0.00854393	1527	tags=34%	list=21%	signal=27%	1490/4323/4313/1281/6664/158326/3202/4209/249/2690/162466/56603/55553/1277/8817/1386/3215/5156/359845/2296/26585/60676/9496/871/85301/3911/7067/4054/7422/4522/649/7043/4208/2201/3214/5396/6939/1305/5079/79065/3234/8575
BP	GO:2000191	regulation of fatty acid transport	22	0.517027	2.05313	0.00104347	0.0114844	0.00865037	1472	tags=55%	list=20%	signal=44%	6850/2182/4282/5321/3553/2058/3552/6754/8792/7057/22925/151176
BP	GO:0034110	regulation of homotypic cell-cell adhesion	21	0.519141	2.01148	0.00104492	0.0114844	0.00865037	1065	tags=48%	list=14%	signal=41%	6850/6352/5270/4067/5329/5580/5588/5962/80139/11117
BP	GO:0048002	antigen processing and presentation of peptide antigen	33	0.456288	2.06046	0.00104925	0.0114845	0.00865041	875	tags=39%	list=12%	signal=35%	54842/2213/54209/7189/1509/1636/55016/6556/81622/219972/2207/811/1515
BP	GO:0036296	response to increased oxygen levels	13	0.613707	2.03155	0.00105216	0.0114845	0.00865041	829	tags=54%	list=11%	signal=48%	4313/6648/1026/523/1277/2308/847
BP	GO:0014896	muscle hypertrophy	50	0.411012	2.03113	0.00105268	0.0114845	0.00865041	1348	tags=40%	list=18%	signal=33%	3479/9759/7222/8470/221476/3488/9472/8654/5997/183/2308/4000/10539/148/29995/10611/3357/5999/7273/1535
BP	GO:0030282	bone mineralization	77	0.36467	1.93648	0.00104998	0.0114845	0.00865041	2588	tags=60%	list=35%	signal=39%	5743/3479/246/2185/490/249/162466/4015/7481/2719/1278/5745/1893/359845/5167/650/26585/4054/4208/2201/4921/5552/1901/90/57419/197/54880/657/9923/6575/340419/8074/3491/2268/4322/4745/144165/5764/7291/1230/6348/29887/54829/654/2355/3381
BP	GO:0006096	glycolytic process	44	0.422702	2.03684	0.00106271	0.0115513	0.00870075	1069	tags=34%	list=14%	signal=29%	3479/2597/3939/6774/26137/9759/5230/5563/5315/7351/226/9611/26471/5223/8671
BP	GO:0019364	pyridine nucleotide catabolic process	44	0.422702	2.03684	0.00106271	0.0115513	0.00870075	1069	tags=34%	list=14%	signal=29%	3479/2597/3939/6774/26137/9759/5230/5563/5315/7351/226/9611/26471/5223/8671
BP	GO:0040037	negative regulation of fibroblast growth factor receptor signaling pathway	13	0.612342	2.02703	0.00107491	0.0116412	0.00876848	2211	tags=85%	list=30%	signal=59%	23213/55959/2817/387914/7474/2625/7057/90993/8862/10253/81848
BP	GO:0048659	smooth muscle cell proliferation	96	0.33352	1.82498	0.00107458	0.0116412	0.00876848	1342	tags=31%	list=18%	signal=26%	5743/3248/3479/4318/4313/27250/55810/6352/6648/1026/4209/30008/2006/3488/6772/650/8840/3162/10203/3486/7168/7043/9510/4208/3398/7520/4921/348/7057/1901
BP	GO:0048762	mesenchymal cell differentiation	180	0.288919	1.7064	0.00107796	0.011653	0.00877734	2256	tags=44%	list=31%	signal=32%	4139/3479/51176/27250/8828/2335/2295/28984/1000/80031/283149/55593/54910/7481/1277/4192/116844/6608/7472/6591/4017/30812/4254/2022/223117/57556/359845/6772/650/2296/26585/1947/3553/183/2316/3911/25805/7422/7474/6943/7043/4208/80139/2625/3357/3170/152007/90102/57142/653/596/2487/6615/90/58495/10500/6201/8092/6663/657/9037/90864/4040/51384/4087/6910/1910/101/3037/9241/7869/9723/6405/64218/10507/105…
BP	GO:0048738	cardiac muscle tissue development	141	0.304455	1.7537	0.00108229	0.0116785	0.00879653	1404	tags=32%	list=19%	signal=26%	50507/3479/27063/70/6445/8470/221476/1385/4036/55553/9215/7472/10052/2274/23414/129446/2022/5156/9472/650/2296/5997/26585/23363/7168/861/6909/57493/811/7422/4000/148/26011/4208/7490/3398/7139/10611/5999/7273/4607/3776/1901/4629/653
MF	GO:0031406	carboxylic acid binding	79	0.356488	1.90052	0.00108782	0.0116955	0.00880937	1738	tags=42%	list=24%	signal=32%	2171/6402/2950/6280/6279/1381/2168/5091/84286/56603/4192/55289/7903/2729/55258/3482/5660/2675/283208/10536/5066/5264/241/9227/8128/6403/6401/116362/2350/5033/259/1109/213
MF	GO:0043177	organic acid binding	79	0.356488	1.90052	0.00108782	0.0116955	0.00880937	1738	tags=42%	list=24%	signal=32%	2171/6402/2950/6280/6279/1381/2168/5091/84286/56603/4192/55289/7903/2729/55258/3482/5660/2675/283208/10536/5066/5264/241/9227/8128/6403/6401/116362/2350/5033/259/1109/213
MF	GO:0000977	RNA polymerase II transcription regulatory region sequence-specific DNA binding	450	0.24104	1.49723	0.0011137	0.0119521	0.00900263	2094	tags=36%	list=28%	signal=28%	51176/10365/6774/8553/26137/26298/29842/60468/55810/9759/11317/26468/2099/6671/440077/6775/6304/53335/6664/55509/2295/3202/1385/7704/64324/2122/4209/8648/2354/4784/55553/4862/79800/8609/4780/2034/8463/6591/4807/2104/1386/56981/30812/3215/64321/171017/1051/2115/6772/9572/9970/55311/1052/2296/4929/197320/4783/4603/9496/9580/22809/467/861/1602/6909/2308/1660/7067/56977/29841/2186/84146/83439/1628/26…
CC	GO:0015934	large ribosomal subunit	73	0.357822	1.88591	0.00112566	0.0120586	0.00908281	4322	tags=93%	list=59%	signal=39%	6138/7311/6164/5935/6134/285855/6171/6160/4736/6122/6152/6159/6173/6146/9349/6135/6132/6137/6166/9045/6155/6154/11224/6141/6158/6128/6133/6161/6175/6144/6129/6139/25873/6130/6181/6143/6165/6167/6142/6156/6168/6169/6124/6157/6170/6125/23521/6136/6176/122704/64979/9553/6147/116541/51263/51264/55052/26589/29074/28977/64975/84545/64928/116540/51258/64981/219927/63875
BP	GO:0090199	regulation of release of cytochrome c from mitochondria	24	0.50274	2.06703	0.0011338	0.0121238	0.00913198	1286	tags=46%	list=17%	signal=38%	581/3479/4318/57048/2876/5329/1191/4000/90427/10018/598
BP	GO:0048667	cell morphogenesis involved in neuron differentiation	292	0.258374	1.57212	0.00116892	0.012477	0.00939795	2459	tags=46%	list=33%	signal=32%	4897/84189/65059/57689/71/8828/2335/9353/4756/26999/53335/1385/547/5048/1009/120114/2534/80031/473/1272/3996/1002/10678/54910/8609/4133/5063/5795/6608/23114/6091/627/23499/2717/223117/51466/5588/57556/2115/4137/4929/6616/1947/9344/6383/23363/3925/3676/1627/7422/7474/5789/51199/4208/80243/5802/3251/7779/10006/2625/7408/59352/10611/4038/26012/84628/26052/348/8543/84612/8633/219699/57142/6498/27067/…
BP	GO:0002448	mast cell mediated immunity	22	0.513512	2.03917	0.00117906	0.0125625	0.00946239	2212	tags=68%	list=30%	signal=48%	5880/6850/10125/8832/4067/10417/8773/2624/116449/3815/2242/2268/3566/5294/6813
BP	GO:1904705	regulation of vascular associated smooth muscle cell proliferation	50	0.408102	2.01675	0.00118788	0.0126338	0.00951609	1156	tags=34%	list=16%	signal=29%	3248/3479/4318/4313/27250/55810/6648/1026/4209/30008/3488/10203/7168/7043/9510/4208/4921
MF	GO:0023023	MHC protein complex binding	22	0.51307	2.03742	0.00119993	0.012718	0.00957952	1869	tags=64%	list=25%	signal=48%	931/3312/481/3326/3821/5315/975/3320/920/925/3824/567/311/51571
CC	GO:1904813	ficolin-1-rich granule lumen	83	0.348172	1.87038	0.0012001	0.012718	0.00957952	1385	tags=35%	list=19%	signal=29%	4318/9535/3312/2950/3326/4332/5049/3303/51719/5315/1508/116844/2934/10213/1509/2495/1512/1476/4282/23412/3320/847/226/3608/5223/2992/3043/11333/5701
BP	GO:0002691	regulation of cellular extravasation	26	0.477255	1.98875	0.00120712	0.0127697	0.00961842	2479	tags=73%	list=34%	signal=49%	10164/4192/9435/10894/3676/961/23236/3554/6403/6401/101/729230/83700/5724/7070/83483/683/3383/2650
BP	GO:0048864	stem cell development	60	0.383596	1.96527	0.00121379	0.0128173	0.00965429	2422	tags=60%	list=33%	signal=41%	5788/8828/2335/1000/80031/54910/6608/6591/30812/4254/223117/57556/2296/1947/3911/3357/596/90/58495/10500/6663/657/9037/29072/1910/7869/9723/6405/64218/10507/10501/7291/10512/8854/56920/3084
BP	GO:0002070	epithelial cell maturation	12	0.615921	1.98126	0.0012216	0.0128768	0.00969912	1031	tags=58%	list=14%	signal=50%	29842/1026/3202/2034/7422/2624/1050
BP	GO:0001932	regulation of protein phosphorylation	336	0.254018	1.55906	0.00122415	0.0128807	0.00970209	2422	tags=43%	list=33%	signal=30%	50507/3479/718/1116/5788/4318/6850/55024/10125/27250/142679/57761/11122/10457/2950/1026/11006/7448/54209/2185/2335/9353/100133941/595/28984/5906/4067/64324/2534/2690/3301/51719/5795/6608/5329/5580/5168/7498/6091/2192/4908/8817/7189/4254/6547/6789/116496/5167/650/100506658/5997/26585/3553/64943/11221/183/9344/56892/3486/57493/1981/7422/7474/23531/894/5899/80243/25999/10006/7520/64853/55600/4921/87…
BP	GO:0048384	retinoic acid receptor signaling pathway	18	0.531185	1.96116	0.00123345	0.0129556	0.0097585	1139	tags=50%	list=15%	signal=42%	10365/56603/5371/2104/6672/811/7067/9745/6258
BP	GO:0046324	regulation of D-glucose import	33	0.452651	2.04404	0.0012491	0.0130967	0.00986478	1567	tags=48%	list=21%	signal=38%	3479/114882/3667/2719/4780/1636/5167/100506658/2887/55600/6041/8682/6506/23596/151176/344901
BP	GO:0002709	regulation of T cell mediated immunity	56	0.381615	1.92864	0.00125593	0.0131451	0.0099012	2160	tags=55%	list=29%	signal=39%	5788/11006/2213/924/3821/7189/975/1604/3553/3329/3554/2625/8809/10865/3071/6693/7454/3824/30009/567/3593/135250/912/51571/50943/9390/84861/383/729230/634/3606
BP	GO:0098869	cellular oxidant detoxification	63	0.377173	1.9513	0.00126067	0.0131645	0.00991581	1768	tags=44%	list=24%	signal=34%	5743/5052/6648/2950/6280/2176/2168/3039/2936/140809/4780/10516/2876/5742/847/3240/241/4259/3043/348/2879/2878/4504/1193/4258/259/213/119391
BP	GO:0006869	lipid transport	193	0.279908	1.66045	0.00126222	0.0131645	0.00991581	1582	tags=31%	list=21%	signal=25%	5743/2171/63982/6850/57048/51454/2181/114880/225/1381/56729/54209/79895/2168/185/28965/345274/81671/4067/1374/2182/9885/114882/5580/301/1191/653509/1636/4282/5321/153768/5360/3553/183/7351/29015/5660/2058/1080/3552/6754/4792/8792/10062/6646/20/348/7057/9227/1622/28232/22925/3929/79065/9525/151176/255189/116362/81537
BP	GO:0002279	mast cell activation involved in immune response	23	0.519532	2.09675	0.00126761	0.0131665	0.00991735	2212	tags=70%	list=30%	signal=49%	5880/6850/10125/8832/5169/4067/8773/2624/116449/3815/2242/2268/3566/5294/5777/6813
BP	GO:0050918	positive chemotaxis	34	0.445294	2.02754	0.00127798	0.0131665	0.00991735	895	tags=38%	list=12%	signal=34%	3958/10457/6352/11151/3627/3148/5795/2358/2277/4908/4282/7422/7474
BP	GO:0090497	mesenchymal cell migration	44	0.418008	2.01422	0.00127719	0.0131665	0.00991735	2243	tags=61%	list=30%	signal=43%	8828/2335/1000/80031/54910/6608/30812/4254/223117/57556/1947/3911/3357/90/58495/10500/6663/9037/1910/7869/9723/6405/64218/10507/10501/7291/10512
BP	GO:0046032	ADP catabolic process	45	0.41429	2.00487	0.00127584	0.0131665	0.00991735	1069	tags=33%	list=14%	signal=29%	3479/2597/3939/6774/26137/9759/5230/5563/5315/7351/226/9611/26471/5223/8671
BP	GO:0038095	Fc-epsilon receptor signaling pathway	14	0.577628	1.96981	0.0012681	0.0131665	0.00991735	834	tags=50%	list=11%	signal=44%	6850/4067/7189/5588/5599/2208/2207
BP	GO:0002437	inflammatory response to antigenic stimulus	47	0.399286	1.95236	0.00127047	0.0131665	0.00991735	1668	tags=43%	list=23%	signal=33%	3579/718/6850/10125/2213/54209/3148/2778/4067/2534/2876/975/3055/940/10769/2625/2212/6693/2209/3593
BP	GO:0051345	positive regulation of hydrolase activity	103	0.334366	1.84049	0.00127497	0.0131665	0.00991735	1284	tags=32%	list=17%	signal=27%	5341/6774/10125/9448/6352/6281/8477/10297/185/5906/4067/8874/3303/5580/4908/9712/6000/10010/1512/650/116985/92154/7052/85397/5660/6004/10276/4208/143872/6251/57148/10062/57186
BP	GO:0002920	regulation of humoral immune response	27	0.479917	2.02645	0.00128105	0.0131753	0.00992395	720	tags=37%	list=10%	signal=34%	718/5788/2213/54209/11005/3075/966/1604/3553/2208
BP	GO:0042327	positive regulation of phosphorylation	230	0.273232	1.64116	0.00129778	0.0133242	0.0100361	2234	tags=41%	list=30%	signal=30%	50507/3479/7018/718/1116/5788/4318/6850/55024/10125/142679/10457/6352/1026/7448/54209/2185/100133941/595/28984/5906/4067/2690/51719/5795/5329/5580/5168/6091/4908/8817/7189/4254/6789/4282/116496/650/26585/3553/9344/56892/1981/7422/7474/23531/894/5899/2887/25999/10006/7520/55600/25778/4921/8792/8995/4038/7057/8543/5770/56005/55704/28232/90/4504/916/920/84722/3815/114/3976/7010/1464/4915/8737/5058/5…
BP	GO:0031099	regeneration	100	0.329635	1.81271	0.00131088	0.0134353	0.0101198	1148	tags=31%	list=16%	signal=27%	3479/4313/1026/7448/4756/595/55959/1374/10404/9215/8837/4192/3371/2876/301/3936/1636/10631/1051/975/3482/11221/9315/7351/861/2316/558/5802/59352/5396/471
BP	GO:0019724	B cell mediated immunity	73	0.354629	1.86908	0.00131484	0.0134527	0.0101329	1686	tags=41%	list=23%	signal=32%	718/5788/720/713/712/2213/729/9214/54209/5580/1191/975/1604/2208/940/3329/2207/730/3635/64170/80762/2212/9156/733/30009/716/2209/939/3539/930
CC	GO:0005840	ribosome	137	0.307349	1.76199	0.0013228	0.0135108	0.0101766	4360	tags=88%	list=59%	signal=36%	6138/7311/51065/64320/6164/5935/6217/3921/6134/2935/1981/811/285855/6171/6160/51021/4504/6201/4736/4690/6122/6152/6159/6210/200916/6173/6146/9349/6223/6135/28973/6132/6137/6166/9045/6155/6193/6154/11224/6205/6141/6158/6128/6133/6231/6161/6175/6144/6129/6202/6139/25873/6187/6238/6130/6188/1915/6224/6181/6229/6143/6165/6203/1938/6192/6167/6142/6156/6168/6169/6124/6228/6227/2197/6232/6235/6157/6206/…
BP	GO:0007566	embryo implantation	34	0.444393	2.02344	0.00133742	0.0135202	0.0101838	1262	tags=41%	list=17%	signal=34%	5743/4318/4313/7076/81671/2192/2288/3553/7356/811/7422/3490/2201/7216
BP	GO:1903036	positive regulation of response to wounding	45	0.413916	2.00306	0.00133428	0.0135202	0.0101838	2209	tags=58%	list=30%	signal=41%	7448/71/7852/4780/4192/301/100506658/8840/55612/2316/7056/11117/4638/10565/4921/7391/7057/64581/5327/5054/5328/130120/7001/2896/5764/64094
MF	GO:0005044	scavenger receptor activity	19	0.530145	1.98356	0.00133295	0.0135202	0.0101838	2475	tags=79%	list=34%	signal=53%	93556/7448/55576/5168/5167/84466/57007/10216/9332/284297/949/51435/3959/4481/51554
BP	GO:0001755	neural crest cell migration	43	0.407911	1.95939	0.00133146	0.0135202	0.0101838	2243	tags=60%	list=30%	signal=42%	8828/2335/80031/54910/6608/30812/4254/223117/57556/1947/3911/3357/90/58495/10500/6663/9037/1910/7869/9723/6405/64218/10507/10501/7291/10512
BP	GO:0050921	positive regulation of chemotaxis	81	0.355253	1.89877	0.0013365	0.0135202	0.0101838	895	tags=30%	list=12%	signal=26%	5880/3579/7941/6352/1435/719/6354/54209/3627/2185/9353/7852/1902/284340/5795/4192/2358/2277/4908/8817/5156/811/7422/7474
BP	GO:0001936	regulation of endothelial cell proliferation	83	0.346838	1.86322	0.00133239	0.0135202	0.0101838	1714	tags=40%	list=23%	signal=31%	187/6774/23213/6347/8828/93974/185/3148/28984/4192/116844/7472/7498/2022/1893/6772/79805/55109/3162/3676/7422/7474/2624/4208/3357/348/51162/7057/56005/441478/3593/7010/8862
BP	GO:0031640	killing of cells of another organism	42	0.424529	2.02464	0.00135806	0.0136765	0.0103014	2286	tags=60%	list=31%	signal=41%	3958/2597/8993/729/3627/2920/3001/6364/9547/4069/730/733/6361/6367/4818/5551/3004/5320/57817/6372/6338/383/820/6357/2921
BP	GO:0141061	disruption of cell in another organism	42	0.424529	2.02464	0.00135806	0.0136765	0.0103014	2286	tags=60%	list=31%	signal=41%	3958/2597/8993/729/3627/2920/3001/6364/9547/4069/730/733/6361/6367/4818/5551/3004/5320/57817/6372/6338/383/820/6357/2921
BP	GO:0034612	response to tumor necrosis factor	124	0.309842	1.75871	0.0013598	0.0136765	0.0103014	1205	tags=29%	list=16%	signal=25%	83643/5743/1116/10365/6850/841/27063/6352/2950/6347/4317/929/2185/55504/3303/4780/1277/10010/10631/7538/6772/9572/9261/92610/445/1660/3611/2353/7412/677/1050/11093/2625/4792/8792/8995
BP	GO:0071622	regulation of granulocyte chemotaxis	33	0.450061	2.03234	0.00136901	0.0137458	0.0103537	1593	tags=45%	list=22%	signal=36%	5880/3579/6352/1435/719/9353/27202/284340/5795/4192/1803/8995/7057/3929/3071
BP	GO:0019725	cellular homeostasis	399	0.244494	1.51545	0.00137141	0.0137466	0.0103543	1723	tags=30%	list=23%	signal=24%	581/50507/477/5052/7018/7447/187/5788/26137/8804/309/51606/51022/84181/7222/6352/1215/481/6648/5563/2950/6347/5579/6354/482/11151/54209/3627/2185/79689/4756/5798/523/4067/490/249/84286/4015/2936/760/9215/9885/8609/4780/1277/5371/2876/5745/10568/6557/6547/1636/2495/6332/2729/9472/9572/5167/7052/5314/6556/3162/7351/7178/1729/2308/226/2316/811/23236/7474/6558/6659/783/10539/506/1080/3552/7779/8671/3…
BP	GO:0071356	cellular response to tumor necrosis factor	114	0.320453	1.79237	0.00138525	0.0138619	0.0104411	1205	tags=30%	list=16%	signal=25%	83643/1116/10365/6850/841/27063/6352/2950/6347/4317/2185/55504/3303/4780/1277/10010/10631/7538/6772/9572/9261/92610/445/1660/3611/2353/7412/677/1050/11093/2625/4792/8792/8995
MF	GO:0046982	protein heterodimerization activity	149	0.301867	1.75031	0.0013926	0.0139119	0.0104788	1771	tags=38%	list=24%	signal=29%	581/477/8553/147/225/481/482/53335/185/5048/4209/5049/5371/2034/1191/1386/4929/467/2958/7168/861/148/94239/26011/55506/4208/134/57148/7391/919/3776/9491/23051/3745/25801/55766/25841/57186/10589/9555/3015/1535/596/8639/22806/3777/58528/7171/3593/114/1649/3013/8335/653604/4760/57451
BP	GO:0045619	regulation of lymphocyte differentiation	126	0.310842	1.76885	0.00141388	0.0141007	0.010621	1669	tags=36%	list=23%	signal=28%	914/4323/5788/51176/8993/6850/10125/11006/969/7704/11005/56603/3956/4192/301/11221/940/9580/861/6659/6605/677/558/6932/3398/3635/8808/2625/3707/80762/3142/8995/5896/6688/441478/6666/100/3071/30009/22806/60/939/3624/3593/942
BP	GO:0009191	ribonucleoside diphosphate catabolic process	51	0.390634	1.93633	0.00142115	0.0141494	0.0106577	1069	tags=31%	list=14%	signal=27%	3479/2597/3939/6774/26137/9759/5230/5563/957/5315/7351/226/9611/26471/5223/8671
BP	GO:0060231	mesenchymal to epithelial transition	14	0.571915	1.95033	0.00142521	0.014166	0.0106702	1874	tags=71%	list=25%	signal=53%	10409/6608/6772/26585/7490/2625/6939/3976/6299/4435
BP	GO:0050777	negative regulation of immune response	126	0.310568	1.76729	0.00143236	0.0142132	0.0107058	2195	tags=44%	list=30%	signal=32%	3958/5788/8993/6850/55646/4321/1281/11006/2213/969/5169/54209/246/3821/10225/2778/4067/2534/9470/11005/387837/84868/3956/2876/301/966/1604/3055/11221/10769/3635/80762/3142/10062/8995/25939/6688/26058/3071/6693/3824/30009/3593/259/2885/50943/383/729230/634/2268/2896/3428/90865/3566/5292/5777
BP	GO:0019882	antigen processing and presentation	52	0.385731	1.91898	0.00143898	0.014255	0.0107372	1820	tags=48%	list=25%	signal=36%	54842/2213/54209/7189/1509/1636/1512/55016/115827/2208/6556/81622/219972/2207/811/1515/7057/5865/925/7454/2209/567/135250/912/5873
BP	GO:0034405	response to fluid shear stress	21	0.510556	1.97822	0.00144585	0.0142992	0.0107705	1003	tags=43%	list=14%	signal=37%	5743/10365/4313/2185/4780/1636/445/7043/4208
BP	GO:0002675	positive regulation of acute inflammatory response	13	0.60543	2.00415	0.00145173	0.0143334	0.0107963	2216	tags=85%	list=30%	signal=59%	5743/718/3553/241/8792/2209/9180/101/5008/5294/7124
BP	GO:1990748	cellular detoxification	78	0.354439	1.88754	0.00146468	0.0144132	0.0108564	1768	tags=42%	list=24%	signal=33%	5743/5052/6648/2950/6280/2176/2168/3039/2936/140809/4780/10516/2876/6556/5742/847/3240/2098/216/241/10314/4259/3043/348/2879/2878/4504/1193/57016/4258/259/213/119391
BP	GO:0003012	muscle system process	242	0.271699	1.63586	0.00146345	0.0144132	0.0108564	1587	tags=30%	list=22%	signal=24%	5743/3479/477/1674/2982/23213/309/147/9759/7222/3762/481/9456/8470/221476/7852/1131/55959/490/9215/8837/1241/2934/1410/10052/3488/6547/55800/6332/9472/8654/5997/3553/183/3320/3162/7168/6909/2308/226/2316/776/4000/783/10539/148/23704/6525/143872/29995/4638/7139/134/10611/3357/5999/7273/4607/6263/59/57644/6328/1535/800/4629/10398/7871/6326/2628/100/6323/1193/4635
BP	GO:0002693	positive regulation of cellular extravasation	12	0.60915	1.95948	0.00147276	0.0144687	0.0108982	2441	tags=92%	list=33%	signal=61%	4192/10894/961/3554/101/729230/83700/5724/7070/83483/3383
BP	GO:0001836	release of cytochrome c from mitochondria	28	0.477239	2.03874	0.0014778	0.0144942	0.0109174	1478	tags=46%	list=20%	signal=37%	581/3479/4318/57048/6648/2876/5329/1191/4000/90427/10018/598/596
BP	GO:0046545	development of primary female sexual characteristics	54	0.387495	1.94483	0.00148912	0.0145254	0.0109409	1022	tags=33%	list=14%	signal=29%	581/4323/4313/10184/2099/56729/9353/5798/23414/4254/1051/5156/2296/1602/7422/26471/9510/7490
BP	GO:0014033	neural crest cell differentiation	64	0.373953	1.93884	0.0014851	0.0145254	0.0109409	2422	tags=59%	list=33%	signal=40%	8828/2335/1000/80031/55593/54910/6608/6591/30812/4254/223117/57556/2296/1947/3911/4208/3357/2487/90/58495/10500/6201/6663/657/9037/4040/1910/7869/9723/6405/64218/10507/10501/7291/10512/8854/56920/3084
BP	GO:0055007	cardiac muscle cell differentiation	67	0.361002	1.88241	0.00148663	0.0145254	0.0109409	1182	tags=34%	list=16%	signal=29%	50507/3479/70/8470/221476/55553/9215/2274/5156/9472/650/5997/26585/23363/811/7422/4000/148/4208/7490/10611/5999/7273
BP	GO:0002695	negative regulation of leukocyte activation	123	0.315504	1.78825	0.0014908	0.0145254	0.0109409	1669	tags=36%	list=23%	signal=28%	3958/5788/8993/55024/8832/10457/6441/11006/2213/969/5169/221395/2335/4332/6664/4067/84868/3956/4192/301/1051/7305/8654/9572/10461/7356/861/55824/558/3398/3635/80762/3142/10062/8995/6385/387597/441478/6693/116449/30009/5320/3624/942
BP	GO:1905330	regulation of morphogenesis of an epithelium	39	0.421461	1.97715	0.00150121	0.014579	0.0109812	1109	tags=38%	list=15%	signal=33%	23213/2099/3627/9500/4192/6608/7472/6591/30812/26585/183/6909/7422/7474/2625
BP	GO:0048878	chemical homeostasis	488	0.235787	1.46854	0.00150027	0.014579	0.0109812	1723	tags=29%	list=23%	signal=24%	581/50507/477/2171/7018/7447/187/5788/6774/26137/8804/57048/309/51606/7222/6352/1215/481/6441/6648/5563/2950/5579/6354/482/11151/5169/54209/3627/2185/79689/221395/4756/185/100133941/5798/5547/22913/2778/523/4067/490/249/84286/760/9885/8609/3667/1277/5795/5371/2034/2876/5745/10568/6557/3488/6547/1636/2495/1512/6332/2729/9472/9572/5167/5664/9476/8840/7052/5314/183/6556/3162/7351/7178/1729/2308/2316…
BP	GO:0030199	collagen fibril organization	46	0.408019	1.98422	0.00150639	0.0146054	0.0110011	1156	tags=39%	list=16%	signal=33%	1281/4015/1277/1278/30008/4017/2296/26585/871/60681/283208/4016/649/1805/79709/11117/2331/4921
BP	GO:0030317	flagellated sperm motility	52	-0.228257	-2.11334	0.00151736	0.014616	0.0110091	2532	tags=63%	list=34%	signal=42%	55779/25911/161502/80217/80127/92749/84229/63978/114327/151195/79582/255101/200373/493/29922/257177/480/25790/644890/219681/219670/11092/389799/286207/117155/6652/26074/164395/57119/54585/338/55726/27019
BP	GO:0097722	sperm motility	52	-0.228257	-2.11334	0.00151736	0.014616	0.0110091	2532	tags=63%	list=34%	signal=42%	55779/25911/161502/80217/80127/92749/84229/63978/114327/151195/79582/255101/200373/493/29922/257177/480/25790/644890/219681/219670/11092/389799/286207/117155/6652/26074/164395/57119/54585/338/55726/27019
BP	GO:1903055	positive regulation of extracellular matrix organization	17	0.555589	2.01576	0.00151199	0.014616	0.0110091	1393	tags=59%	list=19%	signal=48%	28984/8837/30008/650/183/861/79709/11117/4921/90102
BP	GO:0060688	regulation of morphogenesis of a branching structure	34	0.442133	2.01314	0.00151574	0.014616	0.0110091	895	tags=38%	list=12%	signal=34%	23213/2099/53335/9500/4192/6608/7472/6591/30812/26585/183/7422/7474
BP	GO:0055093	response to hyperoxia	11	0.62178	1.94874	0.00154135	0.014819	0.0111621	829	tags=55%	list=11%	signal=48%	4313/6648/1026/1277/2308/847
CC	GO:0005604	basement membrane	71	0.360606	1.89194	0.00154344	0.014819	0.0111621	2552	tags=58%	list=35%	signal=38%	7076/7448/2335/158326/1295/1286/25975/3371/30008/4017/2192/1284/1282/151887/83872/133584/3914/3911/7078/7045/4016/9510/3918/3898/59/1305/10319/6693/79812/255631/7058/80781/284217/64094/341640/27283/255743/9423/1306/1288/6678
BP	GO:0050931	pigment cell differentiation	18	0.524821	1.93766	0.00157667	0.0150928	0.0113683	2108	tags=72%	list=29%	signal=52%	6648/4254/5167/4208/55686/596/26258/3815/83938/6663/5873/4435/1910
BP	GO:0003015	heart process	148	0.299916	1.73767	0.00157705	0.0150928	0.0113683	1587	tags=33%	list=22%	signal=27%	50507/477/1674/147/3762/6271/481/482/70/6445/7852/490/2534/79717/2034/2876/2934/10052/6547/1636/55800/6332/8654/5997/183/3320/7168/6909/2316/776/7067/783/10539/148/23704/7139/134/5999/7273/4607/57644/6328/5770/1573/6326/100/6323/1193/4635
BP	GO:0009060	aerobic respiration	108	0.325643	1.81145	0.00158978	0.0151901	0.0114416	3321	tags=72%	list=45%	signal=40%	1337/4710/93974/1340/440567/84701/1349/847/54205/26471/4191/506/1537/4705/2271/9555/51079/4713/135154/80025/514/4693/7124/400916/125965/863/27089/4696/10632/9551/4698/4702/1329/509/11315/4700/1350/4714/4697/522/1347/1327/1345/1351/51142/539/54539/10975/9377/513/10476/4695/4694/4718/4715/4711/515/1291/1339/29103/3418/2647/4716/126328/387/4708/55753/4717/4712/84300/4726/7415/4706/4190/55967/4709/47…
BP	GO:0010611	regulation of cardiac muscle hypertrophy	31	0.454583	2.00122	0.001601	0.0152481	0.0114853	1177	tags=42%	list=16%	signal=35%	3479/7222/221476/9472/8654/5997/183/2308/4000/10539/148/29995/5999
BP	GO:0002431	Fc receptor mediated stimulatory signaling pathway	26	0.47097	1.96256	0.00159917	0.0152481	0.0114853	860	tags=38%	list=12%	signal=34%	5788/6850/4067/2534/5795/5580/3055/2208/2207/961
MF	GO:0004497	monooxygenase activity	34	0.439929	2.00311	0.0016148	0.0153467	0.0115595	1735	tags=50%	list=24%	signal=38%	2328/1571/2327/9023/56603/2326/5740/3162/1580/5066/1593/1573/100137047/8418/1548/1576/1109
CC	GO:0005775	vacuolar lumen	96	0.325914	1.78336	0.00161653	0.0153467	0.0115595	1613	tags=35%	list=22%	signal=28%	2171/718/51316/8804/12/3312/56729/4332/2239/3425/2719/1508/5580/1634/1509/2717/2817/3320/6383/4069/633/5660/1515/10383/2992/2331/53/25801/6385/5549/5834/29952/5551/5657
BP	GO:0008033	tRNA processing	49	-0.239892	-2.10934	0.00163498	0.0154722	0.0116541	2209	tags=59%	list=30%	signal=42%	79074/64172/129450/9692/81627/116461/10557/1787/221078/26995/81605/79828/26610/283742/9836/56986/51605/51654/27304/144233/90353/27037/84520/25917/134637/8518/10775/83707/55039
BP	GO:0019216	regulation of lipid metabolic process	162	0.291518	1.70569	0.00163238	0.0154722	0.0116541	1546	tags=30%	list=21%	signal=24%	83643/5743/3248/2171/718/2327/26137/2181/57761/225/12/9023/5230/9518/54209/221395/339/2168/1385/1374/3667/2326/5580/6591/9572/650/3553/26580/114898/9611/5660/7067/3490/27122/3398/3552/134/3357/10062/33/94101/20/348/1958/9555/653/151176/6615/80025
BP	GO:0038093	Fc receptor signaling pathway	41	0.416721	1.98024	0.00166365	0.01569	0.0118181	1647	tags=46%	list=22%	signal=36%	5284/6850/338339/2213/9214/4067/2534/5580/7189/5588/5599/3055/2208/2207/919/2212/3932/2209/3815
BP	GO:0001503	ossification	260	0.261602	1.57961	0.00166594	0.01569	0.0118181	1567	tags=30%	list=21%	signal=24%	5743/1490/3479/4323/51176/4313/1435/8519/246/2185/6664/490/7704/1009/4209/249/162466/4015/7481/2719/1277/1278/4192/3371/6608/6591/8817/2274/5745/7189/5787/30812/3488/1893/1051/359845/9970/8642/5167/1052/650/2296/26585/8840/3486/861/847/1660/7067/25805/3611/4054/7422/7474/649/4208/506/22800/1050/2201/3485/4921/8792/4038/23051/5552/1305/1901/90993/5701/653/151176/596/6615/90/57419/344901
BP	GO:0044092	negative regulation of molecular function	294	0.258504	1.5732	0.00166594	0.01569	0.0118181	1594	tags=29%	list=22%	signal=24%	581/2597/5788/6590/4318/51176/8553/27250/142679/57761/11122/9759/2099/7076/2950/1026/11006/7448/3001/6664/93974/5270/4067/5273/3301/387837/84868/4133/51719/5795/6608/146057/5740/2717/6547/1893/7538/1476/6672/5599/5997/3553/64943/11221/5314/183/871/3925/3676/2316/57493/7078/3240/5962/5899/5269/26471/1454/23704/80243/3398/7139/3300/80762/10565/4792/64853/26086/3170/348/57580/9555/10763/1028/5770/58…
BP	GO:0097237	cellular response to toxic substance	81	0.350851	1.87524	0.00167773	0.015776	0.0118829	1768	tags=42%	list=24%	signal=32%	5743/5052/6648/2950/6280/2176/2168/3039/2936/140809/4780/10516/2876/6556/5742/847/3240/2098/216/241/10314/4259/3043/348/25841/2879/2878/4504/1193/57016/4258/259/213/119391
BP	GO:0031214	biomineral tissue development	99	0.321588	1.76466	0.00168786	0.0158461	0.0119357	2588	tags=55%	list=35%	signal=36%	5743/3479/246/2185/490/249/162466/4015/7481/2719/1277/1278/5745/1893/1051/359845/5167/650/26585/4054/3694/4208/1080/2201/26504/4921/6574/5552/1901/90/57419/197/54880/657/258/9923/6575/340419/8074/3491/2268/4322/4745/144165/5764/7291/1230/6348/29887/54829/654/23462/2355/3381
BP	GO:0014902	myotube differentiation	63	0.371074	1.91975	0.00169669	0.0159037	0.0119791	1157	tags=33%	list=16%	signal=28%	3479/4323/963/9759/11096/9456/9518/3627/4756/56603/9215/8837/2876/6608/51177/627/975/4627/1827/4208/3756
BP	GO:0002283	neutrophil activation involved in immune response	13	0.601029	1.98958	0.0017032	0.0159396	0.0120061	2264	tags=85%	list=31%	signal=59%	6850/3684/57126/7305/2207/6688/6338/3689/5724/6813/306
BP	GO:0098754	detoxification	86	0.338776	1.83011	0.00172044	0.0160755	0.0121085	1768	tags=41%	list=24%	signal=31%	5743/5052/6648/2950/6280/2176/2168/3039/2936/140809/4780/10516/2876/6556/5742/847/3240/2098/216/7779/241/10314/4259/3043/348/2879/2878/4502/4504/1193/57016/4258/259/213/119391
BP	GO:0006261	DNA-templated DNA replication	57	-0.214202	-2.08933	0.00173412	0.0161779	0.0121856	2274	tags=58%	list=31%	signal=40%	7013/4172/5558/4999/580/50485/84083/4175/142/55388/84893/2021/1025/5000/5888/54617/5111/84515/92667/9837/51507/604/5425/1017/5965/64785/5442/56652/253714/11169/23595/7083/5428
BP	GO:0048545	response to steroid hormone	167	0.289427	1.69641	0.0017615	0.0164074	0.0123585	1356	tags=30%	list=18%	signal=25%	5743/477/5788/3312/2099/2706/1026/9353/3148/3158/7035/249/2690/8648/4015/2354/3303/3301/8837/1277/301/1636/7538/9572/2288/3557/7351/10628/445/7356/6909/9611/811/3490/2353/6943/7043/1036/677/3485/64170/6754/6258/10062/10018/20/10728/56937/7057/51569
BP	GO:0034605	cellular response to heat	32	0.444266	1.98438	0.00176871	0.0164487	0.0123896	1339	tags=44%	list=18%	signal=36%	5743/3326/1026/3627/4067/3303/4137/9261/3320/3162/56892/3552/7057/51278
BP	GO:0016064	immunoglobulin mediated immune response	72	0.360224	1.89281	0.00179332	0.0165994	0.0125031	1686	tags=42%	list=23%	signal=32%	718/5788/720/713/712/2213/729/9214/54209/5580/1191/975/1604/2208/940/3329/2207/730/3635/64170/80762/2212/9156/733/30009/716/2209/939/3539/930
BP	GO:0045834	positive regulation of lipid metabolic process	56	0.374302	1.89168	0.0017928	0.0165994	0.0125031	1274	tags=34%	list=17%	signal=28%	83643/5743/26137/2181/225/9518/221395/2168/1385/1374/3667/5580/9572/3553/3552/134/3357/10062/348
CC	GO:0034399	nuclear periphery	79	0.347036	1.85013	0.00178779	0.0165994	0.0125031	1252	tags=33%	list=17%	signal=28%	10409/1063/8507/6281/7431/6304/53335/6310/5371/5580/25909/1051/4137/6672/6421/2353/4000/862/6605/4001/78994/80139/10565/6041/26012/3930
BP	GO:0097193	intrinsic apoptotic signaling pathway	173	0.286456	1.68563	0.00181865	0.0168076	0.0126599	1712	tags=34%	list=23%	signal=27%	581/5743/4318/4313/57761/6648/1026/6280/6279/2213/54209/23612/1396/10595/100133941/2534/51065/3303/3301/4780/5371/2876/960/5329/5580/1191/6591/1386/1051/4282/57007/6421/7178/839/54205/26471/133746/3090/9641/10018/8440/23368/598/5770/90993/6498/8452/596/6615/6326/8575/5326/81537/3932/64782/60401/1649/4193/6201
BP	GO:0002673	regulation of acute inflammatory response	23	0.504129	2.03459	0.00182411	0.0168318	0.0126781	2216	tags=70%	list=30%	signal=49%	5743/718/2950/2213/3553/134/241/8792/6693/2209/9180/1910/101/5008/5294/7124
BP	GO:0061041	regulation of wound healing	80	0.343139	1.83387	0.00182751	0.0168369	0.012682	1750	tags=41%	list=24%	signal=32%	135228/7448/71/7852/5270/7035/51330/4780/5329/5580/301/5156/100506658/8840/55612/7056/6558/11117/4638/10565/4921/7391/3170/348/7057/7429/64581/90102/5327/2191/5054/5328/130120
BP	GO:0001913	T cell mediated cytotoxicity	27	0.47231	1.99433	0.00183446	0.0168747	0.0127105	2130	tags=67%	list=29%	signal=48%	5788/2213/3821/1512/3251/5551/3071/3004/3824/6957/567/3593/135250/912/5873/51571/9390/634
MF	GO:0016209	antioxidant activity	55	0.385427	1.94328	0.0018484	0.0169652	0.0127786	1768	tags=45%	list=24%	signal=35%	5743/5052/6648/2950/6280/2168/3039/2936/140809/2876/5742/847/3240/241/4259/3043/348/2879/2878/4504/1193/4258/259/213/119391
BP	GO:0046903	secretion	459	0.237316	1.47562	0.00185002	0.0169652	0.0127786	2277	tags=39%	list=31%	signal=29%	5880/5743/3479/7447/5341/6850/10125/8832/90139/84236/2181/27063/6352/6281/5579/3684/6279/2213/56729/1731/57126/11151/54209/4756/6664/185/5798/595/1131/28984/2778/5906/1385/5270/4067/1374/5048/821/8648/3996/760/2182/9885/8609/3667/10516/301/4628/7498/1636/2022/4282/7127/4053/9572/5321/3557/650/8773/115827/6616/10461/3553/3055/7052/183/7351/4627/2308/4544/23236/7422/6558/9601/8775/55737/6659/5899/4…
BP	GO:0007178	cell surface receptor protein serine/threonine kinase signaling pathway	201	0.2686	1.59396	0.0018703	0.0171246	0.0128987	1551	tags=30%	list=21%	signal=24%	3248/51176/6774/23213/27250/135228/8483/3309/1281/3326/9518/4756/6664/4036/283149/4015/3303/2719/1278/5371/116844/1386/100532736/8516/2022/4053/650/26585/55612/9315/25805/3611/4054/3694/7474/27122/51742/2353/5654/23625/4774/7043/60436/80139/2201/11117/26036/2331/9719/56937/7057/1958/1028/64388/653/58533/6498/90/151556/58495
BP	GO:0003298	physiological muscle hypertrophy	15	0.557271	1.92602	0.00188326	0.0171637	0.0129281	1177	tags=53%	list=16%	signal=45%	3479/8470/221476/9472/5997/148/10611/5999
BP	GO:0003301	physiological cardiac muscle hypertrophy	15	0.557271	1.92602	0.00188326	0.0171637	0.0129281	1177	tags=53%	list=16%	signal=45%	3479/8470/221476/9472/5997/148/10611/5999
BP	GO:0061049	cell growth involved in cardiac muscle cell development	15	0.557271	1.92602	0.00188326	0.0171637	0.0129281	1177	tags=53%	list=16%	signal=45%	3479/8470/221476/9472/5997/148/10611/5999
BP	GO:0030540	female genitalia development	10	0.641323	1.95927	0.00189021	0.0172006	0.012956	1013	tags=60%	list=14%	signal=52%	581/2099/4036/10461/7474/558
BP	GO:0070498	interleukin-1-mediated signaling pathway	18	0.521095	1.9239	0.00189843	0.0172489	0.0129923	1307	tags=50%	list=18%	signal=41%	7850/7189/3557/3553/23236/3554/8808/4792/1958
BP	GO:0010758	regulation of macrophage chemotaxis	19	0.521201	1.9501	0.00190877	0.0173114	0.0130394	1298	tags=53%	list=18%	signal=43%	6352/1435/719/2185/284340/5795/4192/4282/8995/7057
BP	GO:0030217	T cell differentiation	173	0.285602	1.6806	0.00191115	0.0173114	0.0130394	1669	tags=34%	list=23%	signal=27%	914/5788/51176/6850/6774/10125/29851/11006/338339/969/6775/3821/7704/11005/56603/3956/4192/301/1386/3553/11221/940/9580/861/2207/6659/6605/677/6932/3552/8808/2625/3707/3142/8995/57580/1958/8809/5896/6688/596/441478/6666/9935/100/916/3071/6693/920/925/30009/3932/22806/60/939/567/3815/3593/942
BP	GO:0050864	regulation of B cell activation	69	0.349774	1.82764	0.00192219	0.0173849	0.0130947	1789	tags=42%	list=24%	signal=32%	4323/5788/6850/55024/1026/2213/51237/4332/4067/4282/7305/975/940/677/4208/3398/3635/80762/6688/596/100/3071/30009/22806/939/3624/930/57162/54537
BP	GO:0002446	neutrophil mediated immunity	19	0.52109	1.94969	0.0019301	0.0174068	0.0131112	2474	tags=79%	list=34%	signal=53%	6850/3684/57126/1636/64170/6688/6372/6338/383/3570/3689/5724/6813/306/54210
BP	GO:0035265	organ growth	97	0.325548	1.78528	0.0019305	0.0174068	0.0131112	2250	tags=48%	list=31%	signal=34%	3479/10409/2099/8470/221476/6608/7472/23414/1386/1893/6789/9472/2296/5997/85301/861/6909/57493/5660/148/26011/4208/7490/10611/3142/4921/5999/10018/3776/1901/596/344901/4086/657/25987/4087/340419/6910/2242/2539/4322/9241/5292/5629/10253/7373/6532
BP	GO:0003007	heart morphogenesis	151	0.292503	1.69964	0.00194631	0.0175227	0.0131985	2309	tags=46%	list=31%	signal=32%	187/27250/11096/27063/8828/70/9353/6664/4036/7481/6608/7472/8463/6591/6091/2274/23414/129446/1386/2006/64321/2022/57211/8642/650/2296/7168/6909/2316/57493/3611/7422/7474/6659/9510/4208/7139/2625/3357/7273/4607/1901/57142/653/140706/6615/90/58495/7010/4193/657/23768/51384/4087/6910/3491/55636/3037/9241/4853/5292/144165/5629/7291/10512/8854/1832/7134/55273
BP	GO:0001662	behavioral fear response	21	0.504552	1.95495	0.00195241	0.0175244	0.0131998	1478	tags=52%	list=20%	signal=42%	477/9215/4862/4192/1803/1981/4208/348/7419/5896/596
BP	GO:0002209	behavioral defense response	21	0.504552	1.95495	0.00195241	0.0175244	0.0131998	1478	tags=52%	list=20%	signal=42%	477/9215/4862/4192/1803/1981/4208/348/7419/5896/596
BP	GO:0048812	neuron projection morphogenesis	333	0.247263	1.5155	0.00197942	0.0177399	0.0133621	2459	tags=44%	list=33%	signal=31%	4897/9448/84189/65059/57689/71/8828/2335/9353/4756/26999/53335/7852/1385/547/4036/5048/1009/2534/80031/473/1272/3996/1002/10678/54910/8609/4133/5063/5795/6608/23114/6091/4908/627/23499/100532736/2717/10631/223117/51466/5588/57556/2115/4137/4929/6616/1947/9344/6383/23363/3925/3676/1627/7422/7474/5789/11202/51199/80243/5802/3251/7779/10006/2625/7408/59352/10611/4038/26012/84628/26052/9576/348/8543/…
MF	GO:0005506	iron ion binding	55	0.384333	1.93777	0.00198267	0.0177422	0.0133639	1730	tags=44%	list=23%	signal=34%	1571/3934/7018/9023/246/3039/56603/7498/5740/2495/316/1580/811/283208/1036/10536/80853/5264/1593/285381/1573/1548/5033/1576
BP	GO:1901654	response to ketone	110	0.304987	1.69854	0.00199738	0.0178469	0.0134427	2693	tags=55%	list=37%	signal=35%	5788/10365/5563/2706/1026/3684/9353/3158/2778/1385/2690/8648/2354/8837/3371/1636/10631/7351/10628/445/2782/6909/811/3490/2353/7043/1080/64170/10062/598/7057/441376/7832/2153/3624/114/6446/8031/6663/50943/6338/1536/5737/653361/5724/7097/1829/358/2/196/6559/6898/8061/54331/6155/114907/11335/1019/109/2235
BP	GO:0007187	G protein-coupled receptor signaling pathway coupled to cyclic nucleotide second messenger	18	0.520372	1.92124	0.00200569	0.0178941	0.0134783	1126	tags=50%	list=15%	signal=42%	6347/1131/301/5745/183/10203/4544/6754/3357
BP	GO:0002827	positive regulation of T-helper 1 type immune response	12	0.602219	1.93719	0.00202076	0.0180015	0.0135592	2160	tags=83%	list=29%	signal=59%	5321/3553/6556/3554/8809/10865/30009/3593/729230/3606
BP	GO:2000353	positive regulation of endothelial cell apoptotic process	13	0.59569	1.97191	0.00204613	0.0182001	0.0137088	1362	tags=62%	list=18%	signal=50%	27250/6347/28984/57124/3676/7057/641700/5770
BP	GO:0046326	positive regulation of D-glucose import	21	0.504088	1.95316	0.00205795	0.0182504	0.0137467	1472	tags=52%	list=20%	signal=42%	3479/114882/3667/2719/4780/100506658/55600/6041/6506/23596/151176
BP	GO:0048638	regulation of developmental growth	156	0.286306	1.67052	0.00205752	0.0182504	0.0137467	1569	tags=31%	list=21%	signal=25%	3479/10409/4897/6774/51316/1435/1026/9518/2335/221476/53335/7852/2778/1385/5048/80031/2690/1002/4133/6608/7472/23414/627/23499/6789/9472/4137/2296/5997/11221/861/6909/23236/7422/7474/4208/5802/7490/3142/5999/10018/3776/348/7429/57142/596/2691/344901/4504
MF	GO:0030414	peptidase inhibitor activity	82	0.344359	1.84433	0.00207231	0.0183503	0.0138219	1304	tags=33%	list=18%	signal=27%	2597/718/6590/12/135228/720/7076/221476/3697/5858/5270/5273/7035/11005/2719/51377/1476/183/871/56925/7078/5269/6692/9491/80760/7057/140686
BP	GO:0051017	actin filament bundle assembly	93	0.333483	1.82398	0.00208254	0.0184134	0.0138694	1486	tags=35%	list=20%	signal=29%	1490/5341/6281/71/2185/8477/28984/1902/84952/221061/2006/3936/51466/56776/116985/7168/3925/2316/961/5962/57026/7043/5358/7429/6385/1901/80774/800/10398/90102/55704/8452/26258
BP	GO:0010759	positive regulation of macrophage chemotaxis	13	0.595318	1.97068	0.00211471	0.0185869	0.0140001	1298	tags=62%	list=18%	signal=51%	6352/1435/719/284340/5795/4192/8995/7057
BP	GO:0002291	T cell activation via T cell receptor contact with antigen bound to MHC molecule on antigen presenting cell	12	0.600145	1.93052	0.00211209	0.0185869	0.0140001	1150	tags=58%	list=16%	signal=49%	3958/54209/80031/84868/7305/975/54518
BP	GO:0046320	regulation of fatty acid oxidation	18	0.518894	1.91578	0.00211294	0.0185869	0.0140001	490	tags=39%	list=7%	signal=36%	2327/225/9518/2168/1374/3667/2326
BP	GO:1902905	positive regulation of supramolecular fiber organization	103	0.328947	1.81066	0.00211364	0.0185869	0.0140001	2242	tags=49%	list=30%	signal=34%	1490/5341/6281/246/2185/8477/28984/1902/3303/10435/2876/2934/30008/1191/51466/4137/100506658/3055/10109/7168/2316/961/57026/7043/79709/7408/8440/348/7429/11034/6385/22919/55704/10787/3071/84722/2885/23191/9873/9037/5058/3304/2242/4690/5629/5829/5216/9788/6376/22899
MF	GO:0030215	semaphorin receptor binding	19	0.517856	1.93758	0.00212204	0.0185882	0.0140011	2401	tags=79%	list=33%	signal=53%	54209/80031/54910/223117/57556/10500/9037/7869/9723/6405/64218/10507/10501/10512/56920
BP	GO:0031401	positive regulation of protein modification process	287	0.256429	1.55898	0.00212741	0.0185882	0.0140011	2269	tags=40%	list=31%	signal=29%	50507/3479/718/1116/5788/4318/6850/55024/10125/142679/57761/9759/10457/5563/3309/1026/7448/54209/2185/100133941/595/28984/5906/4067/2690/51719/5795/5371/5329/5580/5168/6091/4908/8817/10010/7189/4254/1636/6789/116496/285671/650/26585/3553/9344/388630/56892/1981/7422/7474/54165/23531/6659/894/5899/26471/25999/3300/10006/7520/80762/55600/4921/8792/8995/4038/7057/1958/5770/6500/56005/55704/28232/1086…
BP	GO:0048729	tissue morphogenesis	370	0.246703	1.52233	0.00212741	0.0185882	0.0140011	2367	tags=42%	list=32%	signal=30%	3579/72/187/4323/51176/4313/23213/11096/27063/2099/4321/1435/1281/71/8828/70/3627/9353/6664/7852/2295/3202/4036/9500/5048/760/54910/7481/2719/5371/4192/3371/960/116844/6608/7472/30008/8463/6591/6091/23414/129446/1282/7189/30812/8516/64321/3488/2022/1512/6789/6772/8642/650/2296/26585/7052/55612/5314/183/9496/7168/6909/2316/57493/3911/79630/3611/7422/7474/85407/2139/6943/4522/4208/7490/3214/4638/71…
BP	GO:0048598	embryonic morphogenesis	320	0.248377	1.51786	0.00212741	0.0185882	0.0140011	1556	tags=28%	list=21%	signal=23%	581/187/4323/4318/51176/4313/23213/84189/4317/7448/4237/2335/6664/2295/3202/4036/7704/8648/1295/56603/54910/7481/2719/6608/7472/8463/1284/7189/23168/30812/2202/3215/8516/64321/2022/6789/5156/3557/2296/26585/9496/3914/4627/6909/3676/3911/7474/2139/6943/4522/7043/2624/8019/26011/10194/677/4208/60436/4646/3398/2201/3214/55788/2625/7408/3357/5396/6692/3142/10018/4038/3170/6385/9555/8543/5079/1028/901…
BP	GO:0030168	platelet activation	85	0.337661	1.82274	0.00213739	0.0186478	0.014046	2250	tags=49%	list=31%	signal=35%	5341/6850/1281/71/1606/2778/5270/4067/5795/5580/2717/5156/5588/5321/10461/4627/2316/2207/3611/7056/558/11117/11093/3043/348/8525/10398/65991/6403/3932/2151/60/23657/6288/239/634/83706/3570/3690/5294/5777/6532
BP	GO:0071322	cellular response to carbohydrate stimulus	72	0.357588	1.87896	0.002155	0.0187738	0.0141409	1359	tags=35%	list=18%	signal=29%	50507/7447/26137/1215/5563/5603/5579/54209/5798/8609/1277/2876/1636/2729/9572/10203/7351/23236/6659/677/1080/7391/3170/3745/64581
BP	GO:0061564	axon development	256	0.264785	1.5987	0.00216441	0.0188281	0.0141818	2459	tags=46%	list=33%	signal=32%	4897/4313/84189/65059/57689/71/8828/2335/9353/4756/26999/53335/1385/5048/1009/2534/80031/1272/3996/1002/10678/54910/8609/4133/5063/5795/3371/6608/23114/6091/627/23499/2717/223117/51466/5588/57556/2115/4137/79805/4929/6616/1947/9344/23057/9315/3925/3676/2316/7422/7474/51199/5802/2625/7408/59352/4038/84628/348/8543/84612/8633/219699/57142/6498/3800/349667/596/84665/4504/60/56978/10500/140578/4884/4…
BP	GO:0045646	regulation of erythrocyte differentiation	32	0.439663	1.96382	0.00218919	0.0190026	0.0143132	1663	tags=50%	list=23%	signal=39%	6774/3148/3202/4067/3303/7538/6772/2624/677/3635/51621/6688/9935/3071/567/3624
BP	GO:0002456	T cell mediated immunity	75	0.350365	1.84979	0.00219088	0.0190026	0.0143132	2160	tags=52%	list=29%	signal=37%	5788/11006/2213/924/3821/7189/1512/975/1604/3553/3329/81622/3554/3251/2625/8809/10865/5551/3071/6693/925/3004/7454/3824/30009/6957/567/3593/135250/912/5873/51571/50943/9390/84861/383/729230/634/3606
BP	GO:0061180	mammary gland epithelium development	43	0.397371	1.90876	0.00220728	0.0191169	0.0143993	1398	tags=40%	list=19%	signal=32%	581/2099/1435/595/3202/5371/2876/6608/7472/6091/1051/7474/3398/80139/2625/3664/57142
BP	GO:0072089	stem cell proliferation	65	0.365433	1.89645	0.00222669	0.0192568	0.0145047	1343	tags=37%	list=18%	signal=30%	5788/135228/6664/3148/2122/7481/6591/2192/4254/64321/1636/55612/861/4054/7474/4072/677/1050/3214/7520/5396/3664/10763/947
MF	GO:0045499	chemorepellent activity	22	0.498318	1.97884	0.00224394	0.0193495	0.0145745	2422	tags=77%	list=33%	signal=52%	80031/54910/223117/57556/1803/10500/9037/23768/7869/9723/6405/64218/10507/10501/10512/56920/3084
BP	GO:2000027	regulation of animal organ morphogenesis	47	0.389911	1.90653	0.00224162	0.0193495	0.0145745	1109	tags=36%	list=15%	signal=31%	23213/1435/5579/9500/6608/7472/6591/6091/30812/650/26585/5314/183/7422/7474/7490/2625
BP	GO:0043303	mast cell degranulation	21	0.502265	1.94609	0.00226964	0.0195143	0.0146987	2212	tags=67%	list=30%	signal=47%	5880/6850/10125/8832/4067/8773/2624/116449/3815/2242/2268/3566/5294/6813
BP	GO:0002063	chondrocyte development	15	0.550295	1.90191	0.00226667	0.0195143	0.0146987	816	tags=47%	list=11%	signal=42%	23213/55959/8817/1893/359845/871/85301
MF	GO:0033293	monocarboxylic acid binding	35	0.428008	1.96347	0.00227515	0.0195333	0.014713	1738	tags=49%	list=24%	signal=37%	2171/2950/6280/6279/1381/2168/5091/84286/56603/55289/3482/5660/241/9227/116362/1109/213
BP	GO:0033028	myeloid cell apoptotic process	19	0.517051	1.93457	0.00229329	0.0196605	0.0148088	1723	tags=58%	list=23%	signal=44%	3579/6352/301/6591/4254/4282/7067/4208/3707/596/23657
CC	GO:0101003	ficolin-1-rich granule membrane	36	0.428341	1.9706	0.00232215	0.0198506	0.0149519	979	tags=39%	list=13%	signal=34%	3958/2357/338339/5547/5273/2358/23114/1604/8655/6556/140885/1729/2207/5269
BP	GO:0042326	negative regulation of phosphorylation	126	0.302998	1.72421	0.00232167	0.0198506	0.0149519	1416	tags=31%	list=19%	signal=25%	5788/27250/142679/57761/11122/2950/1026/11006/9353/4067/3301/5795/6608/5580/7498/2192/4908/6547/116496/5167/100506658/5997/3553/8655/64943/11221/183/3486/57493/1981/80243/64853/26146/348/57580/9555/1028/5770/58533
BP	GO:0009408	response to heat	50	0.392993	1.94208	0.00234868	0.0200456	0.0150989	1339	tags=38%	list=18%	signal=31%	5743/3479/3326/1026/3627/11080/4067/3303/3301/1410/2729/4137/9261/3320/3162/56892/3552/7057/51278
BP	GO:0048872	homeostasis of number of cells	194	0.27167	1.61117	0.00235174	0.0200456	0.0150989	1733	tags=33%	list=24%	signal=26%	5880/3579/581/5052/10365/6774/55646/1435/11151/221395/2176/93974/3148/3202/4067/1000/3303/2034/6608/301/4254/7538/4282/6772/22884/10461/3162/7067/7422/6659/4522/2624/677/4208/558/3398/3635/64170/2625/3707/10018/22985/2271/51621/6498/5896/387597/6688/26058/596/26258/9935/100/100127206/3071/5320/6005/567/3815/57817/3624/23657/6372/174
BP	GO:0010324	membrane invagination	34	0.427323	1.94571	0.00236947	0.0201677	0.0151908	2363	tags=62%	list=32%	signal=42%	718/51454/3684/2213/54209/246/2934/8685/84466/4627/2624/7057/3071/26228/2209/56907/112574/199/3689/26762/4481
BP	GO:0009137	purine nucleoside diphosphate catabolic process	48	0.3914	1.91681	0.00242887	0.0205551	0.0154826	1069	tags=31%	list=14%	signal=27%	3479/2597/3939/6774/26137/9759/5230/5563/5315/7351/226/9611/26471/5223/8671
BP	GO:0009181	purine ribonucleoside diphosphate catabolic process	48	0.3914	1.91681	0.00242887	0.0205551	0.0154826	1069	tags=31%	list=14%	signal=27%	3479/2597/3939/6774/26137/9759/5230/5563/5315/7351/226/9611/26471/5223/8671
BP	GO:0014910	regulation of smooth muscle cell migration	52	0.37423	1.86176	0.00242632	0.0205551	0.0154826	2181	tags=52%	list=30%	signal=37%	3479/6352/7448/9353/80031/1902/4780/4192/3488/1636/10631/8840/3486/7168/9510/4208/4921/5770/596/5054/4193/5328/657/199/3037/3690/5361
BP	GO:0010876	lipid localization	205	0.271927	1.61558	0.00242339	0.0205551	0.0154826	1582	tags=30%	list=21%	signal=24%	5743/2171/718/63982/6850/57048/51454/2181/114880/225/1381/56729/54209/79895/2168/185/28965/345274/81671/4067/1374/2182/9885/114882/5580/301/1191/653509/1636/4282/5321/153768/5360/3553/183/7351/29015/5660/2058/1080/3552/9641/6754/4792/8792/10062/6646/20/348/7057/9227/1622/28232/22925/3929/79065/9525/151176/255189/116362/81537
CC	GO:0016363	nuclear matrix	68	0.34722	1.81361	0.00245003	0.0207047	0.0155953	1224	tags=32%	list=17%	signal=27%	10409/1063/8507/6281/7431/6304/53335/6310/5371/5580/25909/1051/6421/2353/4000/862/6605/4001/80139/10565/6041/26012
BP	GO:0015986	proton motive force-driven ATP synthesis	50	0.390355	1.92905	0.00246514	0.0208027	0.0156691	3502	tags=84%	list=47%	signal=44%	4710/93974/523/506/4705/51079/4713/514/4696/517/10632/9551/4698/4702/509/4700/4714/516/522/539/54539/513/10476/4695/4694/4718/4715/518/4711/515/4716/126328/4708/4717/4712/4726/4706/55967/4709/4731/4729/4728
BP	GO:0014032	neural crest cell development	56	0.36859	1.86281	0.00248572	0.0209465	0.0157775	2422	tags=59%	list=33%	signal=40%	8828/2335/1000/80031/54910/6608/6591/30812/4254/223117/57556/2296/1947/3911/3357/90/58495/10500/6663/657/9037/1910/7869/9723/6405/64218/10507/10501/7291/10512/8854/56920/3084
BP	GO:0006690	icosanoid metabolic process	65	0.363062	1.88414	0.00249313	0.0209791	0.015802	1784	tags=42%	list=24%	signal=32%	5743/3248/1571/2171/6850/2950/246/2052/747/2876/5740/4282/9261/5321/3553/5742/1800/241/4259/10728/2879/1573/255189/1548/4258/1109/57406
BP	GO:0001701	in utero embryonic development	196	0.279911	1.66039	0.00249988	0.0210061	0.0158223	2309	tags=44%	list=31%	signal=31%	3479/51176/10365/841/123920/343263/1281/1026/55224/729/5954/8648/2034/6608/7472/5745/23414/1386/7189/23168/30812/10568/64321/1051/6789/5156/9644/79805/650/2296/4627/57493/1627/60681/2186/7422/7043/2624/285855/677/1050/7779/4245/2625/6692/10018/1999/338596/598/1028/57142/653/6498/9654/8452/6615/90/58495/100/3976/2885/4848/6663/54880/57680/657/79718/4435/29072/56853/320/4087/6768/284/3491/55636/143…
MF	GO:0019838	growth factor binding	85	0.333642	1.80104	0.00251568	0.0211089	0.0158997	1088	tags=31%	list=15%	signal=26%	7850/1490/1281/8828/4036/2690/1277/1278/116844/1282/3489/3488/2022/5156/4053/2817/3557/3482/3486/4054/3490/3487/5654/7043/3554/3485
BP	GO:0002761	regulation of myeloid leukocyte differentiation	73	0.34279	1.80668	0.00252859	0.0211872	0.0159587	1678	tags=40%	list=23%	signal=31%	51176/841/1435/11006/54209/1385/4067/7189/4254/1051/7305/861/2353/2624/10234/677/3398/3635/80762/8792/22985/130733/151176/9935/81501/920/3624/3593/3976
BP	GO:0010463	mesenchymal cell proliferation	29	0.437449	1.87753	0.00255487	0.0213772	0.0161018	1128	tags=41%	list=15%	signal=35%	7481/2719/6608/7472/6772/8642/650/6909/7474/4000/9678/5396
BP	GO:0045428	regulation of nitric oxide biosynthetic process	42	0.411041	1.96031	0.00257244	0.0214334	0.0161442	1359	tags=40%	list=18%	signal=33%	5743/10365/2099/6648/3326/2185/1191/5740/2717/3553/3320/140885/445/961/3043/348/64581
BP	GO:1904645	response to amyloid-beta	34	0.424562	1.93314	0.00256858	0.0214334	0.0161442	966	tags=35%	list=13%	signal=31%	3479/4318/6850/4313/4321/2213/54209/2534/2358/7305/3676/7412
BP	GO:0030001	metal ion transport	422	0.231064	1.43348	0.00257138	0.0214334	0.0161442	2357	tags=40%	list=32%	signal=29%	581/5743/3934/3958/477/7018/187/5788/140738/931/8832/2273/309/7222/3762/6352/481/9456/6347/5579/482/11151/54209/3627/2185/79689/7852/345274/81671/5270/4067/490/4036/3790/2534/84286/1272/9215/51719/5371/6000/56479/91404/10568/128414/6557/6547/1636/2495/55800/6332/9472/92745/2288/5664/23412/6616/784/183/6556/10203/10916/7351/7178/79026/1729/2316/776/10266/23236/6558/7991/783/23704/7779/8671/4638/13…
BP	GO:0009595	detection of biotic stimulus	24	0.481165	1.97832	0.00260725	0.0216929	0.0163397	2214	tags=67%	list=30%	signal=47%	8993/54209/5795/6608/1386/8406/1602/64581/3929/2191/6957/912/5058/284297/949/7097
BP	GO:0051101	regulation of DNA binding	36	0.42557	1.95785	0.00263971	0.0219014	0.0164967	1171	tags=39%	list=16%	signal=33%	3479/4318/51176/3001/6664/64324/6608/5329/7189/6672/2296/4830/2625/55355
BP	GO:0015732	prostaglandin transport	14	0.556534	1.89788	0.00263894	0.0219014	0.0164967	1418	tags=57%	list=19%	signal=46%	5743/2182/4282/5321/3553/3552/8792/28232
BP	GO:0007162	negative regulation of cell adhesion	168	0.28271	1.65711	0.00265333	0.0219836	0.0165586	2240	tags=43%	list=30%	signal=31%	3958/4323/5788/4313/9448/10457/4321/6441/11006/969/28984/5270/84868/3956/1277/4192/3371/5580/301/6591/2192/340485/10631/1051/57556/8654/3557/650/445/6494/7356/861/7045/7422/5962/4072/55824/506/80139/80762/3142/8995/7057/6385/5770/90102/387597/6688/441478/53827/6693/30009/5320/5054/942/57162/9037/50943/7001/284/27289/239/383/634/8322/3566/83700/5777/9723/10507/81848/6376
BP	GO:0009746	response to hexose	88	0.318781	1.72666	0.00266699	0.022066	0.0166207	1307	tags=31%	list=18%	signal=26%	5743/50507/7447/26137/1215/5563/5579/54209/2185/5798/8609/1277/2876/9462/1636/2729/9572/7351/10628/6659/1080/7391/2752/3170/3745/7057/1958
BP	GO:0031623	receptor internalization	72	0.353508	1.85752	0.00268897	0.0222168	0.0167342	2990	tags=67%	list=41%	signal=40%	3579/187/6850/11006/2690/1902/4908/975/57007/26585/10203/2207/10266/7422/5899/55788/26052/6401/347730/57817/4193/8862/2885/9779/4983/2966/79890/4599/284/634/3689/3690/284654/7430/408/4600/3084/2890/1948/3688/4734/302/8898/375/351/967/10267/928
BP	GO:0030162	regulation of proteolysis	223	0.264788	1.58591	0.00275912	0.0227647	0.0171469	1400	tags=27%	list=19%	signal=23%	7850/2597/7018/4323/6774/841/84236/57761/6281/7076/3326/7448/54209/2185/26999/93974/2295/5270/4067/5273/11005/3303/4780/5371/2876/51377/2934/5329/1191/10010/10213/440730/1893/1512/1476/2729/285671/3553/871/4627/22836/861/5684/7078/5269/26471/1454/1050/2619/84231/3300/10062/9491/10444/348/7057/641700/10869/5770/5701/5327
BP	GO:0090090	negative regulation of canonical Wnt signaling pathway	72	0.35269	1.85322	0.00276525	0.0227835	0.0171611	1307	tags=36%	list=18%	signal=30%	10297/1000/55593/7481/2719/4192/6591/3489/64321/6789/650/26585/55612/9580/2308/7474/85407/27122/3487/79960/27303/3485/4038/7090/348/1958
BP	GO:0071901	negative regulation of protein serine/threonine kinase activity	40	0.40787	1.9212	0.00277764	0.0228538	0.0172141	1362	tags=40%	list=18%	signal=33%	27250/142679/2950/4067/3301/5795/6547/5997/3553/11221/183/57493/64853/348/9555/5770
BP	GO:0002220	innate immune response activating cell surface receptor signaling pathway	56	0.364343	1.84135	0.00279402	0.0229567	0.0172916	1879	tags=45%	list=25%	signal=34%	6850/338382/929/54209/92747/3821/4067/2534/57590/5063/7189/7305/9572/9865/4792/10062/1535/64581/3929/22914/3824/3823/57162/7187/5058
BP	GO:0033762	response to glucagon	12	0.591223	1.90182	0.0028224	0.0230863	0.0173892	1074	tags=58%	list=15%	signal=50%	2706/3158/2778/1385/445/1036/1537
BP	GO:0072576	liver morphogenesis	14	0.55397	1.88913	0.00281938	0.0230863	0.0173892	2216	tags=79%	list=30%	signal=55%	55959/8837/4192/1051/57142/8452/634/4853/5629/5764/7124
BP	GO:0031639	plasminogen activation	15	0.546298	1.8881	0.00283318	0.0230863	0.0173892	3041	tags=93%	list=41%	signal=55%	6281/5230/5270/5329/861/7057/5327/5054/5328/3818/302/7123/1522/55848
BP	GO:0060415	muscle tissue morphogenesis	47	0.385743	1.88614	0.00282637	0.0230863	0.0173892	2459	tags=60%	list=33%	signal=40%	27063/1281/70/4036/7472/30008/23414/129446/2022/650/2296/7168/57493/4638/7139/7273/4607/1901/657/104/4618/55636/9241/5629/1832/7134/3084/5457
MF	GO:0140678	molecular function inhibitor activity	278	0.25251	1.53159	0.00283036	0.0230863	0.0173892	1361	tags=26%	list=18%	signal=22%	3958/2597/718/5788/6590/51176/9535/142679/57761/55646/12/135228/720/6352/56271/7076/3309/3326/1026/11006/9353/221476/3697/93974/5858/5270/490/5273/7035/11005/3303/387837/8577/2719/51377/6608/301/10010/1476/55800/3557/5997/8655/183/140885/871/10628/56925/7356/4947/7078/27122/81706/81611/5269/23704/1080/3398/7779/2040/26036/3485/4792/6692/3776/9491/80760/7057/140686/9555/283131/1028
BP	GO:0032940	secretion by cell	394	0.235008	1.45483	0.00283036	0.0230863	0.0173892	2277	tags=39%	list=31%	signal=29%	5880/5743/3479/7447/5341/6850/10125/8832/90139/27063/6352/6281/5579/3684/2213/56729/1731/57126/11151/54209/4756/6664/185/5798/1131/28984/2778/5906/1385/5270/4067/1374/5048/821/3996/2182/9885/8609/3667/301/4628/2022/4282/7127/4053/9572/5321/3557/650/8773/115827/6616/10461/3553/3055/7052/183/7351/4627/2308/4544/23236/6558/9601/8775/55737/6659/5899/7043/2624/4208/558/1080/3552/7779/134/2625/10565/87…
MF	GO:0008175	tRNA methyltransferase activity	12	-0.479551	-2.00459	0.00284445	0.0231463	0.0174344	1916	tags=75%	list=26%	signal=56%	81627/1787/221078/79828/9836/144233/27037/25917/55039
BP	GO:0002757	immune response-activating signaling pathway	281	0.25404	1.54136	0.00286736	0.0233007	0.0175507	2226	tags=40%	list=30%	signal=29%	581/3958/718/5788/6850/931/55024/338382/123920/8631/3312/2099/5579/719/6280/3684/6279/285852/11006/2357/929/2213/9214/54209/92747/3821/4332/4067/27202/2534/3303/84868/57590/5063/5795/2358/5580/7189/7305/975/9572/9261/92610/5599/3055/2208/784/940/3329/9865/81622/2207/961/81926/4208/5802/7105/3635/2625/4792/10062/919/8525/1535/64581/57142/3929/596/100/916/3071/22914/925/974/3824/3932/7294/3823/2622…
BP	GO:0110053	regulation of actin filament organization	150	0.288334	1.67274	0.0028731	0.0233154	0.0175618	2242	tags=44%	list=30%	signal=31%	1490/5341/9535/6281/71/11151/246/2185/9353/8477/26999/28984/1902/84952/81553/10435/5063/2934/5580/129446/2006/51466/120/116985/3055/10109/7168/3925/2316/961/6709/5962/57026/7043/7408/10565/5999/8440/57580/7429/11034/6385/1901/90102/55704/10787/3071/7454/2885/23191/9873/9037/163782/51571/5058/256949/11078/50853/4690/23647/5829/6050/5216/9788/6376/22899
BP	GO:0106106	cold-induced thermogenesis	83	0.33599	1.80494	0.00290584	0.0234846	0.0176892	1538	tags=35%	list=21%	signal=28%	3934/2171/6850/51316/11096/4237/7852/2778/249/2034/2104/1051/9572/26580/50486/7351/7067/7422/2887/216/10062/33/7090/2271/4883/8809/79813/8864/2628
BP	GO:0120161	regulation of cold-induced thermogenesis	83	0.33599	1.80494	0.00290584	0.0234846	0.0176892	1538	tags=35%	list=21%	signal=28%	3934/2171/6850/51316/11096/4237/7852/2778/249/2034/2104/1051/9572/26580/50486/7351/7067/7422/2887/216/10062/33/7090/2271/4883/8809/79813/8864/2628
BP	GO:0044089	positive regulation of cellular component biogenesis	261	0.258264	1.56116	0.00290436	0.0234846	0.0176892	2348	tags=43%	list=32%	signal=31%	5880/581/3958/1490/5341/6850/9448/84189/8631/6281/79953/246/2185/8477/28984/54849/1902/3303/10435/5795/1191/627/3936/51466/4137/100506658/116985/5599/3055/55612/183/3320/388630/10109/7168/51100/2316/1981/961/7422/5789/5899/7043/10801/23613/11117/7408/90427/10018/4867/8440/26052/348/7429/6385/64581/8128/22919/90102/55704/27067/9525/140469/10787/4314/347730/3071/84722/3815/7010/4915/147381/57451/28…
BP	GO:0045621	positive regulation of lymphocyte differentiation	75	0.343364	1.81283	0.00302911	0.0244475	0.0184145	1669	tags=39%	list=23%	signal=30%	4323/5788/51176/6850/10125/11006/7704/4192/301/11221/9580/861/6659/6605/558/3635/8808/2625/3707/3142/5896/6688/6666/100/3071/60/939/3593/942
BP	GO:0043030	regulation of macrophage activation	36	0.423192	1.94691	0.00303665	0.024475	0.0184352	2357	tags=61%	list=32%	signal=42%	5788/4317/2213/54209/221395/84868/4282/9572/5321/3329/7474/1050/10062/7057/3929/26228/57817/2896/90865/3566/6376/6348
BP	GO:0010623	programmed cell death involved in cell development	12	0.584327	1.87963	0.00305185	0.0245308	0.0184772	1647	tags=67%	list=22%	signal=52%	581/4254/3553/3552/598/8633/596/3815
BP	GO:0055001	muscle cell development	107	0.312921	1.73546	0.00304886	0.0245308	0.0184772	1563	tags=35%	list=21%	signal=28%	3479/27063/9456/71/70/8470/221476/4015/9215/8837/2876/6608/30008/2274/2022/5156/9472/84466/5997/23363/7168/1827/10266/7422/1466/4000/148/7139/10611/5999/7273/4607/4629/10398/92737/596/84665
CC	GO:0031091	platelet alpha granule	58	0.368598	1.86807	0.00307017	0.0246446	0.0185629	1738	tags=43%	list=24%	signal=33%	3479/10184/12/135228/7076/2335/5270/1191/2277/3671/10916/226/7422/7043/29789/5768/51706/5552/7057/6403/2153/5004/5054/197/213
BP	GO:0048146	positive regulation of fibroblast proliferation	36	0.421674	1.93993	0.00307634	0.0246607	0.0185751	1156	tags=39%	list=16%	signal=33%	3479/2099/1026/2335/5371/7472/2192/4282/5156/57124/183/1660/7474/4921
MF	GO:0001848	complement binding	11	0.60089	1.88327	0.00309792	0.0247723	0.0186591	849	tags=55%	list=12%	signal=48%	720/3684/3075/966/84466/811
CC	GO:0098857	membrane microdomain	173	0.2772	1.63116	0.00309863	0.0247723	0.0186591	1695	tags=33%	list=23%	signal=26%	5743/477/5788/931/23213/8631/147/6281/5230/3684/2813/929/57126/54209/100133941/4067/1000/2534/7035/3667/6608/1509/5740/112464/9472/4137/2817/1604/1947/3055/1803/871/79026/148/55824/25999/2040/3635/55600/8792/4038/7851/6506/79180/1901/219699/349667/51744/6401/920/925/5657/3932/4118/114/930/7010
MF	GO:0016705	oxidoreductase activity acting on paired donors with incorporation or reduction of molecular oxygen	63	0.359074	1.85767	0.00310532	0.0247923	0.0186742	1735	tags=41%	list=24%	signal=32%	2328/5743/1571/2327/9023/56603/2326/5740/3162/5742/1580/283208/10536/200424/5066/80853/5264/1593/1573/254295/100137047/8418/1548/5033/1576/1109
BP	GO:0050728	negative regulation of inflammatory response	101	0.311869	1.71566	0.00311738	0.0248551	0.0187215	1754	tags=37%	list=24%	signal=28%	3479/5788/8993/6850/6774/2950/2213/5169/54209/2778/4067/2534/284340/4192/2876/2358/5580/5740/7538/9572/3055/11221/140885/55737/10769/134/2625/80762/10062/348/100/6693/57817/3593/7010/55872/6288
BP	GO:1903317	regulation of protein maturation	37	0.415882	1.92084	0.00314562	0.0250466	0.0188657	1711	tags=46%	list=23%	signal=35%	7850/4323/84236/6281/5270/2934/9462/5329/4627/861/6659/2619/7057/5327/5054/4193/5328
BP	GO:0046620	regulation of organ growth	52	0.369034	1.83591	0.00316391	0.0251246	0.0189245	1225	tags=35%	list=17%	signal=29%	3479/10409/221476/6608/7472/23414/6789/9472/2296/5997/861/6909/4208/7490/3142/5999/10018/3776
BP	GO:0048644	muscle organ morphogenesis	52	0.368809	1.83479	0.00316391	0.0251246	0.0189245	2459	tags=58%	list=33%	signal=39%	27063/1281/70/4036/7472/30008/23414/129446/2022/650/2296/7168/57493/4638/7139/7273/4607/6939/1901/3976/657/104/4618/55636/9241/5629/1832/7134/3084/5457
CC	GO:0045121	membrane raft	172	0.279369	1.64127	0.00317285	0.0251619	0.0189526	1695	tags=33%	list=23%	signal=26%	5743/477/5788/931/23213/8631/147/6281/5230/3684/2813/929/57126/54209/100133941/4067/1000/2534/7035/3667/6608/1509/5740/112464/9472/4137/2817/1604/1947/3055/1803/871/79026/148/55824/25999/2040/3635/55600/8792/4038/7851/6506/79180/1901/219699/349667/51744/6401/920/925/5657/3932/4118/114/930/7010
BP	GO:0048009	insulin-like growth factor receptor signaling pathway	56	0.362094	1.82998	0.0031794	0.0251802	0.0189663	2389	tags=55%	list=32%	signal=38%	3479/8483/2690/3667/3489/3488/5156/650/3482/10461/3486/23236/3487/2887/558/3485/4921/653/26058/2691/3815/7010/4915/2885/1436/2047/1969/4916/1001/2050/5159
BP	GO:2001233	regulation of apoptotic signaling pathway	229	0.263096	1.58008	0.00320034	0.0253122	0.0190658	1712	tags=32%	list=23%	signal=25%	581/5743/3958/3479/5788/4318/4313/6648/2950/6280/6279/2213/54209/3148/9500/2534/3303/3301/51330/8837/4780/5371/2876/960/5329/5580/1191/6591/627/8406/57144/1512/6789/4282/2729/6672/4929/57007/3553/183/3162/467/50486/6421/7178/7474/2139/4000/26471/3552/84231/10018/8440/8682/598/7057/5770/90993/219699/653/6498/596/6615/90/8575/5326/3932/5054/4118/3624/1649/4193/6201
BP	GO:0007492	endoderm development	51	0.370096	1.83453	0.00324495	0.0255966	0.01928	2179	tags=51%	list=30%	signal=36%	4323/4318/4313/4317/7448/2335/1295/1284/23168/64321/3914/4627/3676/2186/8019/677/9555/1844/3624/2885/657/29072/4087/1846/3689/9241
BP	GO:0061333	renal tubule morphogenesis	51	0.369608	1.83211	0.00324495	0.0255966	0.01928	1109	tags=35%	list=15%	signal=30%	9500/7481/2719/6608/1282/30812/8642/650/26585/183/3911/79630/3611/7422/6943/4208/7490/2625
CC	GO:0045277	respiratory chain complex IV	17	0.538744	1.95464	0.00325753	0.0256336	0.0193079	3122	tags=94%	list=42%	signal=54%	84419/1337/1340/84701/1349/125965/56901/1329/1350/4697/1347/1327/1345/1351/9377/1339
BP	GO:0051403	stress-activated MAPK cascade	31	0.433412	1.90802	0.00325829	0.0256336	0.0193079	1092	tags=39%	list=15%	signal=33%	5052/5603/2950/54910/1410/3489/5599/11221/9344/2308/3552/64170
BP	GO:0048754	branching morphogenesis of an epithelial tube	103	0.321038	1.76712	0.00327331	0.0257176	0.0193711	1022	tags=29%	list=14%	signal=25%	4323/51176/2099/1435/9353/3202/9500/2719/5371/4192/3371/6608/7472/1282/30812/2022/1512/6789/8642/650/26585/5314/183/6909/3911/3611/7422/7474/6943/7490
BP	GO:0002686	negative regulation of leukocyte migration	37	0.412341	1.90449	0.00330388	0.0259235	0.0195262	1620	tags=46%	list=22%	signal=36%	6347/9518/969/9353/27202/100532736/4282/26585/1803/3162/23236/11117/134/653/100/22914/26228
BP	GO:0048863	stem cell differentiation	145	0.290662	1.67982	0.00332129	0.0260255	0.0196031	2274	tags=46%	list=31%	signal=33%	5788/6774/399694/2099/8828/2335/1000/80031/55553/55593/54910/4780/6608/8463/6591/30812/4254/64321/1636/223117/7538/5156/57556/2296/26585/1947/6909/3911/4054/4072/4208/3214/7520/3357/83959/6939/596/2487/90/58495/3815/3976/10500/6201/4086/6663/657/9037/29072/4040/6910/1910/9241/5008/144165/5764/7869/9723/6405/64218/10507/10501/7291/3313/10512/8854/2823
BP	GO:0007409	axonogenesis	233	0.261303	1.56937	0.00334833	0.0262028	0.0197366	2459	tags=46%	list=33%	signal=32%	4897/84189/65059/57689/71/8828/2335/9353/4756/26999/53335/1385/5048/1009/2534/80031/1272/3996/1002/10678/54910/8609/4133/5063/5795/6608/23114/6091/627/23499/2717/223117/51466/5588/57556/2115/4137/4929/6616/1947/9344/3925/3676/7422/7474/51199/5802/2625/7408/59352/4038/84628/348/8543/84612/8633/219699/57142/6498/3800/596/84665/4504/60/56978/10500/140578/4884/4915/343472/389549/23191/214/9037/5058/4…
BP	GO:0071425	hematopoietic stem cell proliferation	20	0.491901	1.86677	0.00335712	0.0262369	0.0197623	1343	tags=50%	list=18%	signal=41%	2122/6591/4254/1636/861/7474/1050/3214/7520/947
BP	GO:0045599	negative regulation of fat cell differentiation	33	0.431312	1.94768	0.00339422	0.0264919	0.0199544	963	tags=36%	list=13%	signal=32%	11007/57761/6648/23414/5167/650/8840/2308/7422/7474/862/2624
BP	GO:0001823	mesonephros development	66	0.35146	1.82702	0.00341013	0.02655	0.0199981	1109	tags=33%	list=15%	signal=29%	10409/9353/7704/9500/7481/2719/6608/30812/9244/8642/650/2296/26585/183/847/3911/3611/7422/6943/4072/7490/2625
MF	GO:0042826	histone deacetylase binding	56	0.360227	1.82054	0.00341062	0.02655	0.0199981	1201	tags=34%	list=16%	signal=29%	51176/9759/27063/56271/3326/595/4209/3303/7189/1051/5599/3320/6421/6909/9611/6943/4208/3090/7391
BP	GO:0062009	secondary palate development	13	0.581702	1.9256	0.00342323	0.0265843	0.020024	995	tags=54%	list=13%	signal=47%	51176/6664/7481/3694/7474/7043/10194
CC	GO:0045259	proton-transporting ATP synthase complex	11	0.597664	1.87316	0.00342401	0.0265843	0.020024	2973	tags=100%	list=40%	signal=60%	506/514/10632/9551/509/516/522/539/513/10476/515
BP	GO:1901888	regulation of cell junction assembly	143	0.294649	1.69838	0.0034732	0.026931	0.0202851	2242	tags=45%	list=30%	signal=32%	4139/187/4323/9448/84189/6281/79953/71/2185/26999/5906/2239/54910/5795/6591/627/23499/1636/6616/26585/3553/183/1981/7422/7474/9040/5789/55737/4208/5802/10611/4867/4038/84628/7057/6385/5770/8128/90102/57142/27067/6615/347730/7010/4915/147381/3556/441381/54674/54413/339398/23768/6910/7058/2047/144165/391/64218/10507/7070/7097/7124/57633/22899
BP	GO:0014909	smooth muscle cell migration	59	0.362436	1.84685	0.00348046	0.0269519	0.0203009	2181	tags=51%	list=30%	signal=36%	3479/6352/7448/9353/80031/1902/4780/4192/3488/1636/10631/8840/3486/7168/2887/9510/4208/4921/5770/5327/596/5054/1649/4193/5328/657/199/3037/3690/5361
BP	GO:0001934	positive regulation of protein phosphorylation	220	0.260857	1.56025	0.00349982	0.0270312	0.0203606	2234	tags=40%	list=30%	signal=29%	50507/3479/718/1116/5788/4318/6850/55024/10125/142679/10457/1026/7448/54209/2185/100133941/595/28984/5906/4067/2690/51719/5795/5329/5580/5168/6091/4908/8817/7189/4254/6789/116496/650/26585/3553/9344/56892/1981/7422/7474/23531/894/5899/25999/10006/7520/55600/4921/8792/8995/4038/7057/5770/56005/55704/28232/90/4504/916/920/84722/3815/114/3976/7010/1464/4915/8737/5058/5871/284/3491/1436/1894/3600/360…
BP	GO:0007420	brain development	364	0.236857	1.45939	0.00349632	0.0270312	0.0203606	2277	tags=39%	list=31%	signal=28%	3579/581/477/3939/10409/51176/4897/1063/26468/1215/6271/3309/1281/3684/482/8828/2213/9353/2176/6664/7852/1340/1385/5270/4036/5048/1000/5108/6310/2534/80031/1902/8648/473/1272/55553/9215/54910/4192/51377/6608/23114/7472/6091/1386/1282/146057/7305/650/2296/4929/22884/8655/22809/2316/2186/23236/7474/285025/8775/2353/6659/2624/25777/51199/55506/558/5802/3398/3251/80853/5362/7280/6754/471/9963/4212/51…
CC	GO:0071339	MLL1 complex	17	-0.428066	-2.17244	0.00351936	0.0271362	0.0204396	3277	tags=88%	list=44%	signal=49%	6880/8607/84661/4221/125476/5929/6045/11091/23269/51230/6874/26168/6879/4297/27043
BP	GO:0060419	heart growth	55	0.369675	1.86386	0.00352257	0.0271362	0.0204396	2247	tags=53%	list=30%	signal=37%	3479/10409/8470/221476/7472/23414/9472/2296/5997/861/6909/57493/148/26011/4208/7490/10611/5999/3776/1901/4086/657/6910/2242/2539/9241/5292/5629/7373
BP	GO:0051495	positive regulation of cytoskeleton organization	103	0.318894	1.75533	0.00353517	0.0271979	0.0204861	2242	tags=48%	list=30%	signal=34%	1490/5341/6281/246/2185/8477/28984/1902/3303/10435/2934/51466/4137/120/100506658/3055/10109/7168/2316/961/57026/7043/7408/8440/5202/7429/11034/6385/10763/22919/55704/9525/10787/3071/84722/2885/23191/9873/9037/5058/3304/2242/4690/5629/5829/5216/9788/6376/22899
BP	GO:0001780	neutrophil homeostasis	14	0.546889	1.86498	0.00354112	0.0272083	0.020494	1129	tags=50%	list=15%	signal=42%	3579/1435/301/10461/4522/558/3707
BP	GO:0010001	glial cell differentiation	144	0.287217	1.65748	0.0035475	0.027222	0.0205043	1026	tags=26%	list=14%	signal=23%	51176/6774/7431/6280/712/6279/7448/54209/6664/7852/5270/4067/1000/1902/1272/55553/9215/5795/4192/6608/1191/30812/6547/4137/57211/9572/2817/54587/650/3553/11221/9580/3611/6659/4774/26011/3459/3398
BP	GO:0033559	unsaturated fatty acid metabolic process	57	0.358737	1.81484	0.00356849	0.027291	0.0205563	1784	tags=40%	list=24%	signal=31%	5743/3248/1571/2171/225/2950/246/2052/747/2876/5740/4282/5321/3553/5742/4259/10728/2879/1573/255189/1548/1109/57406
BP	GO:0006469	negative regulation of protein kinase activity	75	0.339728	1.79363	0.00356253	0.027291	0.0205563	1416	tags=33%	list=19%	signal=27%	5788/27250/142679/57761/11122/2950/1026/11006/4067/3301/5795/6547/5997/3553/11221/183/57493/80243/64853/348/57580/9555/1028/5770/58533
BP	GO:0032870	cellular response to hormone stimulus	347	0.242499	1.49171	0.00357032	0.027291	0.0205563	1817	tags=33%	list=25%	signal=26%	477/10365/6774/57761/3312/2099/5563/2706/5579/9518/51237/9353/185/5547/3158/2778/4067/490/7035/2690/8648/2354/3303/3301/56603/760/114882/8837/3667/5315/4780/5795/5371/3371/1508/5580/301/6591/2104/1509/1636/7538/1512/5156/5588/2729/6772/9572/6672/5167/2288/4929/10461/3553/183/7351/445/2782/6909/2308/9611/811/10266/7067/23236/5962/3490/2353/6943/2887/2058/9745/677/4208/558/7490/3485/6754/6258/4921/…
BP	GO:0001676	long-chain fatty acid metabolic process	53	0.378483	1.88962	0.00357967	0.0273273	0.0205836	1452	tags=38%	list=20%	signal=31%	5743/1571/2181/2950/246/28965/2052/1374/2182/747/2876/5740/5321/5742/11332/4259/33/10728/2879/1573
BP	GO:0015711	organic anion transport	196	0.274178	1.62639	0.00361092	0.0274597	0.0206833	1735	tags=34%	list=24%	signal=26%	5743/477/2171/6850/2181/225/1381/9194/2168/10560/28965/345274/4067/1374/4036/2182/115019/301/1636/4282/80727/92745/5321/5997/3553/6556/7351/29015/5660/961/6558/2058/1080/3552/51660/8671/134/6754/51706/9963/8792/5999/81796/159963/83959/3776/6506/348/7057/4735/28232/22925/151176/8864/8501/255189/221074/116362/2350/5320/6005/56301/23657/4915/283238/1109
BP	GO:0045089	positive regulation of innate immune response	201	0.26006	1.54328	0.00361092	0.0274597	0.0206833	1911	tags=35%	list=26%	signal=27%	6850/8807/10125/338382/10621/3312/2099/6352/4321/6280/6279/285852/929/54209/92747/3821/4332/3148/4067/1374/2534/3303/84868/57590/5063/2358/7189/7305/9572/9261/92610/5599/3055/3320/3329/6421/9865/81622/1660/839/7474/81926/5802/7105/9641/64170/7520/4792/10062/1535/64581/57142/3929/6688/22914/116449/3824/7294/3823/4068/3593/135250/912/130120/57162/7187/10318/51114/5058/26057/90864
BP	GO:0055080	monoatomic cation homeostasis	285	0.246568	1.49743	0.00360732	0.0274597	0.0206833	1697	tags=30%	list=23%	signal=24%	581/477/7018/187/5788/8804/309/51606/7222/6352/481/6648/5579/6354/482/11151/3627/2185/79689/4756/185/523/4067/490/249/84286/760/9885/5371/2034/5745/6557/6547/2495/6332/9472/5664/7052/5314/183/6556/3162/7178/1729/2316/811/23236/7474/6558/783/10539/506/1080/3552/7779/8671/134/26504/252839/3357/80762/83959/285175/5330/348/6263/57644/130733/1535/9296/26505/6549/151176/596/57419/221074/4502/4504/1193/…
BP	GO:0055013	cardiac muscle cell development	42	0.405255	1.93272	0.00367209	0.0278891	0.0210068	1360	tags=40%	list=18%	signal=33%	3479/70/8470/221476/9215/2274/5156/9472/5997/23363/7422/4000/148/10611/5999/7273/4629
BP	GO:0042063	gliogenesis	198	0.269839	1.60139	0.00368499	0.0279512	0.0210536	1027	tags=25%	list=14%	signal=22%	4323/51176/6774/7431/1435/6347/1281/6280/712/6279/7448/482/54209/2185/6664/7852/5270/4067/4036/5048/1000/1902/1272/55553/9215/5795/4192/6608/1191/5787/30812/6547/4137/57211/9572/2817/54587/650/3553/11221/9580/3611/6659/4774/25777/26011/3459/3398/22800
BP	GO:0030183	B cell differentiation	83	0.33168	1.78179	0.00370351	0.0280557	0.0211323	1689	tags=39%	list=23%	signal=30%	581/4323/5788/6850/931/9759/2213/2185/3956/5795/9452/3676/7412/677/3398/9678/3635/5079/5896/6688/596/100/3071/974/22806/939/3815/3624/3394/5450/930/29760
BP	GO:0006958	complement activation classical pathway	22	0.483947	1.92177	0.00375384	0.0281848	0.0212295	836	tags=41%	list=11%	signal=36%	718/720/713/712/729/54209/1191/1604/730
BP	GO:0080164	regulation of nitric oxide metabolic process	44	0.392911	1.89329	0.0037427	0.0281848	0.0212295	1359	tags=39%	list=18%	signal=32%	5743/10365/2099/6648/3326/2185/1191/5740/2717/3553/3320/140885/445/961/3043/348/64581
BP	GO:0009134	nucleoside diphosphate catabolic process	53	0.377175	1.88309	0.00373447	0.0281848	0.0212295	1069	tags=30%	list=14%	signal=26%	3479/2597/3939/6774/26137/9759/5230/5563/957/5315/7351/226/9611/26471/5223/8671
BP	GO:0001960	negative regulation of cytokine-mediated signaling pathway	46	0.387147	1.88272	0.00373086	0.0281848	0.0212295	671	tags=28%	list=9%	signal=26%	7850/83643/5788/6352/4321/2950/54209/9353/9470/6091/10010/1893/3557
MF	GO:0005518	collagen binding	52	0.364118	1.81146	0.00374621	0.0281848	0.0212295	2978	tags=67%	list=40%	signal=40%	4318/4321/7448/2335/4015/8404/960/1508/5118/26577/57211/871/7045/51144/84168/4921/7057/50509/5058/147372/1520/4322/7373/131578/1842/7450/6678/9806/9289/114897/5479/3688/4811/7148/1291
BP	GO:0031960	response to corticosteroid	82	0.334399	1.79099	0.00374534	0.0281848	0.0212295	1186	tags=32%	list=16%	signal=27%	5743/5788/2706/1026/9353/3158/249/2690/2354/8837/301/1636/7538/3557/7351/445/7356/6909/3490/2353/1036/677/3485/64170/6754/10018
BP	GO:0034614	cellular response to reactive oxygen species	76	0.336046	1.7809	0.00374919	0.0281848	0.0212295	1013	tags=29%	list=14%	signal=25%	5052/10365/4313/8807/51022/6648/5603/2176/2168/2534/4780/10516/5580/5156/4137/5599/140885/7168/847/2353/10276/558
MF	GO:0008173	RNA methyltransferase activity	22	-0.362511	-2.11244	0.00377568	0.0283128	0.0213259	1916	tags=64%	list=26%	signal=47%	81627/64216/1787/221078/29081/79828/196074/9836/144233/27037/25917/55695/56257/55039
CC	GO:0097545	axonemal doublet microtubule	10	-0.533822	-2.08077	0.00381664	0.0284758	0.0214487	2692	tags=90%	list=37%	signal=57%	146845/161502/114327/29922/257177/25790/219670/11092/389799
CC	GO:0160110	axonemal microtubule doublet inner sheath	10	-0.533822	-2.08077	0.00381664	0.0284758	0.0214487	2692	tags=90%	list=37%	signal=57%	146845/161502/114327/29922/257177/25790/219670/11092/389799
BP	GO:0030316	osteoclast differentiation	62	0.359655	1.85345	0.00380681	0.0284758	0.0214487	2583	tags=58%	list=35%	signal=38%	7018/135228/1435/11006/54209/1385/5048/2719/7189/1051/7305/975/9644/650/8840/2353/10234/3635/8792/130733/151176/9935/81501/3593/1436/4853/7098/7124/1230/1969/6348/29887/814/5457/2355/3726
BP	GO:0044342	type B pancreatic cell proliferation	14	0.54088	1.84449	0.00381178	0.0284758	0.0214487	980	tags=50%	list=13%	signal=43%	5798/3488/9572/3486/1602/3487/26471
BP	GO:0010043	response to zinc ion	20	0.485908	1.84403	0.00382753	0.0284878	0.0214577	1648	tags=55%	list=22%	signal=43%	6648/6279/1396/1385/445/7412/5066/7779/4502/4504/3777
BP	GO:0008585	female gonad development	51	0.364253	1.80556	0.00382787	0.0284878	0.0214577	1733	tags=41%	list=24%	signal=32%	581/4323/4313/2099/56729/9353/5798/23414/4254/1051/5156/2296/7422/26471/9510/7490/598/596/3815/3624/174
BP	GO:0048066	developmental pigmentation	23	0.487058	1.96569	0.00387336	0.0287159	0.0216295	1874	tags=61%	list=25%	signal=46%	581/6648/4254/5167/4208/55686/10018/596/26258/3815/83938/6663/5873/4435
BP	GO:0007263	nitric oxide mediated signal transduction	12	0.576026	1.85293	0.00387791	0.0287159	0.0216295	1298	tags=58%	list=18%	signal=48%	2982/2357/8654/183/7422/348/7057
BP	GO:0071604	transforming growth factor beta production	26	0.44417	1.85088	0.0038777	0.0287159	0.0216295	884	tags=38%	list=12%	signal=34%	5743/1281/2335/100133941/7481/2192/1386/7305/55612/3694
BP	GO:0050851	antigen receptor-mediated signaling pathway	112	0.305943	1.70482	0.00386441	0.0287159	0.0216295	2270	tags=46%	list=31%	signal=32%	581/3958/5788/6850/931/55024/123920/8631/5579/11006/2213/9214/4332/4067/2534/5795/7189/975/784/940/4208/3635/2625/4792/919/8525/596/100/916/3071/925/974/3932/7294/26228/4068/3539/930/29760/2885/50943/23149/23228/634/1445/3119/4690/5777/7070/8517/7430
BP	GO:1902742	apoptotic process involved in development	21	0.484494	1.87723	0.00392411	0.0290061	0.0218482	685	tags=38%	list=9%	signal=35%	581/51176/9353/5371/1410/1386/84466/2296
BP	GO:0015749	monosaccharide transmembrane transport	68	0.337996	1.76542	0.00393179	0.0290061	0.0218482	1567	tags=35%	list=21%	signal=28%	3479/2171/718/57761/5579/114882/3667/2719/4780/1636/5167/100506658/3553/2887/25999/55600/9963/6041/8682/6506/23596/151176/148808/344901
CC	GO:0030027	lamellipodium	127	0.29556	1.67902	0.00392757	0.0290061	0.0218482	1530	tags=31%	list=21%	signal=25%	5880/72/121512/841/65059/70/57126/11151/2185/8470/10297/1000/2245/8874/960/2934/4628/4254/51466/6616/92154/1803/10109/3611/5962/23625/57026/84168/4638/10006/7408/57147/54518/8525/59/7429/8633/55704/2191/10787
BP	GO:0150078	positive regulation of neuroinflammatory response	10	0.613585	1.87453	0.00394245	0.0290125	0.021853	2357	tags=90%	list=32%	signal=61%	4317/54209/3553/26471/26228/3606/90865/7124/6348
BP	GO:0120254	olefinic compound metabolic process	71	0.342994	1.79953	0.00393987	0.0290125	0.021853	2397	tags=54%	list=33%	signal=36%	5743/1571/2950/246/2052/1385/747/2876/5740/5321/650/5742/27122/216/4259/10728/1958/2879/9227/653/1573/10170/1548/57016/3624/1576/174/1109/57406/6338/1910/239/8529/2053/8854/131/3291/6916
BP	GO:0016339	calcium-dependent cell-cell adhesion via plasma membrane cell adhesion molecules	20	0.484049	1.83697	0.00395583	0.0290749	0.0218999	2424	tags=70%	list=33%	signal=47%	6402/1009/1000/1002/8642/28316/64405/6403/22920/53827/1004/1003/1001/9378
BP	GO:0043032	positive regulation of macrophage activation	20	0.483553	1.83509	0.0039986	0.0293528	0.0221092	2357	tags=70%	list=32%	signal=48%	4317/54209/84868/5321/3329/7474/1050/7057/3929/26228/57817/90865/3566/6348
BP	GO:0055006	cardiac cell development	48	0.380567	1.86376	0.00402256	0.0294557	0.0221867	1360	tags=38%	list=18%	signal=31%	3479/27250/70/8470/221476/9215/2274/5156/9472/5997/23363/7422/4000/148/10611/5999/7273/4629
BP	GO:0070527	platelet aggregation	48	0.380517	1.86351	0.00402256	0.0294557	0.0221867	3086	tags=71%	list=42%	signal=41%	5341/6850/71/2778/5270/4067/5580/2717/5156/5588/4627/2316/3611/11117/3043/10398/60/23657/239/634/83706/3570/3690/5294/5777/6532/114897/5478/10627/84034/1465/928/2923/7094
BP	GO:0010574	regulation of vascular endothelial growth factor production	23	0.486231	1.96235	0.00403906	0.02954	0.0222503	1030	tags=39%	list=14%	signal=34%	5743/718/6774/23213/719/55959/284340/3553/3552
BP	GO:0001570	vasculogenesis	61	0.359657	1.84827	0.00404548	0.0295504	0.0222581	2596	tags=59%	list=35%	signal=39%	187/54453/5906/5795/6608/8463/7498/10052/23414/64321/2022/55109/57007/57493/10266/7422/677/7490/51162/947/57142/4915/4435/29072/6910/634/8322/3037/55273/1969/5159/154796/23462/54922/3726/7075
MF	GO:0008233	peptidase activity	239	0.255023	1.53426	0.00405275	0.0295671	0.0222707	1711	tags=31%	list=23%	signal=25%	4323/4318/4313/1368/841/84236/11096/5638/4321/1215/4317/7113/1521/3001/360226/5547/25862/10404/55593/8837/51377/1508/2028/10868/10010/10213/1509/1636/1512/57211/5664/79805/9476/60676/7052/1803/79056/81794/388630/170691/9528/1800/839/80332/1515/3240/11202/5654/649/9510/8745/8728/11093/79634/23203/10869/23478/5327/196294/11174/10026/29952/2191/100137047/4314/9635/3003/3004/5657/716/9629/4319/9805/1…
BP	GO:0045058	T cell selection	33	0.427609	1.93095	0.00407707	0.029708	0.0223768	2164	tags=58%	list=29%	signal=41%	5788/6850/6774/969/3956/940/2625/3707/8995/596/916/6693/920/30009/3593/912/50943/3600/3570
BP	GO:1902041	regulation of extrinsic apoptotic signaling pathway via death domain receptors	31	0.428599	1.88684	0.00410826	0.0298985	0.0225203	1656	tags=48%	list=22%	signal=38%	3958/3148/8837/2876/6789/6672/3162/467/8682/598/7057/653/6498/5054/4118
MF	GO:0015245	fatty acid transmembrane transporter activity	10	0.611109	1.86697	0.0041336	0.0300459	0.0226314	803	tags=50%	list=11%	signal=45%	2171/225/2168/28965/29015
BP	GO:0001818	negative regulation of cytokine production	170	0.279839	1.64055	0.00413951	0.0300521	0.022636	1697	tags=32%	list=23%	signal=25%	7850/3479/5788/51176/8993/10365/55024/27250/8832/225/10457/6441/2950/11006/2213/54209/2335/10225/100133941/28984/490/27202/84868/55593/7481/5371/301/2192/7538/7305/10461/6556/140885/7356/7043/558/5802/113/3635/2625/80762/26146/5552/7057/947/3929/8452/23005/3071/30009/5004/3624/3593/1649
BP	GO:0051100	negative regulation of binding	45	0.394473	1.90897	0.00420969	0.0305241	0.0229915	1643	tags=42%	list=22%	signal=33%	581/6590/51176/1026/3001/6664/4133/6608/146057/6672/5599/3676/5899/1454/3300/10763/8864/2801/567
CC	GO:0043596	nuclear replication fork	13	-0.475552	-2.12708	0.00423319	0.030657	0.0230916	2262	tags=85%	list=31%	signal=59%	4172/5558/2073/50485/84083/142/55388/5111/5425/253714/11169
BP	GO:0042776	proton motive force-driven mitochondrial ATP synthesis	45	0.393167	1.90265	0.00428837	0.0308794	0.0232591	3502	tags=84%	list=47%	signal=45%	4710/93974/506/4705/51079/4713/514/4696/10632/9551/4698/4702/509/4700/4714/522/539/54539/513/10476/4695/4694/4718/4715/4711/515/4716/126328/4708/4717/4712/4726/4706/55967/4709/4731/4729/4728
BP	GO:0043124	negative regulation of canonical NF-kappaB signal transduction	34	0.410704	1.87004	0.00428211	0.0308794	0.0232591	1136	tags=38%	list=15%	signal=32%	841/2099/2950/11006/54209/10868/10010/6772/9572/140885/7105/10133/4792
BP	GO:0035357	peroxisome proliferator activated receptor signaling pathway	10	0.60934	1.86156	0.00427696	0.0308794	0.0232591	677	tags=50%	list=9%	signal=45%	2171/246/8648/5740/650
BP	GO:0030593	neutrophil chemotaxis	59	0.359255	1.83064	0.00428996	0.0308794	0.0232591	856	tags=27%	list=12%	signal=24%	5880/3579/3958/1441/6850/719/6280/6279/3627/9353/27202/4192/3553/1803/2207/1800
BP	GO:0031346	positive regulation of cell projection organization	171	0.27528	1.61615	0.00428868	0.0308794	0.0232591	2274	tags=43%	list=31%	signal=31%	5880/8507/6280/482/2185/2335/9353/53335/5906/4067/5048/54849/2534/8874/1272/10435/1002/8837/4780/4192/5168/6091/627/23499/440730/4137/100506658/116985/5997/3320/23363/10109/2316/1627/7422/7474/5789/7043/51199/10801/23613/7779/4921/26052/348/7429/55704/653/6498/27067/140469/10787/3815/140578/4915/57451/4086/23191/657/9037/51196/9842/9638/2242/8322/2896/4690/5764/10507/5216/6376/55714/23242/2823
BP	GO:0051924	regulation of calcium ion transport	130	0.290131	1.65376	0.00429729	0.0308946	0.0232706	1072	tags=25%	list=15%	signal=22%	581/5743/3958/477/187/931/8832/7222/6352/481/9456/6347/11151/3627/2185/7852/81671/4067/490/2534/5371/91404/1636/9472/5664/784/7351/79026/1729/776/783/7779/4638
BP	GO:0031098	stress-activated protein kinase signaling cascade	32	0.420727	1.87924	0.00431927	0.0309774	0.023333	1092	tags=38%	list=15%	signal=32%	5052/5603/2950/54910/1410/3489/5599/11221/9344/2308/3552/64170
BP	GO:0045137	development of primary sexual characteristics	114	0.301526	1.68651	0.00431897	0.0309774	0.023333	1186	tags=28%	list=16%	signal=24%	581/10409/4323/4313/10184/2099/56729/9353/5798/3148/4036/8648/23414/30812/4254/1636/1051/5156/2296/22836/1602/2316/7422/7474/51742/6943/26471/9510/7490/3552/2625/10018
BP	GO:0001657	ureteric bud development	62	0.356556	1.83748	0.0043447	0.0311221	0.023442	1109	tags=34%	list=15%	signal=29%	10409/9353/9500/7481/2719/6608/30812/9244/8642/650/2296/26585/183/847/3911/3611/7422/6943/4072/7490/2625
BP	GO:0006873	intracellular monoatomic ion homeostasis	248	0.252294	1.52078	0.00435019	0.0311238	0.0234432	1697	tags=31%	list=23%	signal=24%	581/477/7018/187/5788/8804/309/51606/7222/6352/481/5579/6354/482/11151/3627/2185/79689/4756/523/4067/490/84286/760/9885/5371/5745/6547/2495/9472/7052/5314/6556/3162/7178/1729/2316/811/23236/7474/6558/783/10539/506/1080/3552/7779/8671/134/26504/252839/3357/80762/83959/5330/348/6263/57644/130733/1535/9296/6549/151176/596/57419/221074/4502/4504/1193/3932/6005/567/57817/114/930/1649
BP	GO:0061138	morphogenesis of a branching epithelium	124	0.292756	1.66173	0.00437203	0.0312423	0.0235325	924	tags=26%	list=13%	signal=23%	4323/51176/23213/2099/1435/9353/3202/9500/2719/5371/4192/3371/6608/7472/6591/1282/30812/2022/1512/6789/8642/650/26585/7052/5314/183/6909/3911/3611/7422/7474/6943
BP	GO:0050996	positive regulation of lipid catabolic process	13	0.568879	1.88316	0.00438816	0.0312566	0.0235432	1102	tags=54%	list=15%	signal=46%	225/2168/1374/3667/5580/3553/134
BP	GO:0062014	negative regulation of small molecule metabolic process	57	0.355448	1.7982	0.00438091	0.0312566	0.0235432	1500	tags=35%	list=20%	signal=28%	5341/6774/2327/57761/9759/9023/5230/93974/130013/2326/6591/650/9611/27122/26471/33/348/653/151176/6615
BP	GO:0009261	ribonucleotide catabolic process	68	0.336933	1.75987	0.00438985	0.0312566	0.0235432	1069	tags=28%	list=14%	signal=24%	3479/2597/3939/6774/26137/9759/5230/5563/957/5315/7498/8654/7351/226/9611/26471/5223/3251/8671
BP	GO:0019233	sensory perception of pain	32	0.419968	1.87585	0.0044	0.0312912	0.0235693	2452	tags=66%	list=33%	signal=44%	2171/6347/151647/7852/2534/56925/2063/134/6323/29909/4988/729230/2047/60675/7124/4692/358/55273/6348/55107/644139
BP	GO:0035234	ectopic germ cell programmed cell death	10	0.607614	1.85629	0.00442032	0.0313981	0.0236498	1647	tags=70%	list=22%	signal=54%	581/4254/3553/3552/598/8633/3815
BP	GO:0019369	arachidonate metabolic process	30	0.436701	1.89376	0.00448265	0.0318027	0.0239546	1784	tags=50%	list=24%	signal=38%	5743/1571/246/2052/747/2876/5740/5321/5742/4259/10728/2879/1573/1548/57406
BP	GO:0008625	extrinsic apoptotic signaling pathway via death domain receptors	48	0.37847	1.85349	0.00449119	0.0318251	0.0239715	1656	tags=42%	list=22%	signal=33%	581/3958/841/3148/8837/2876/6789/6672/3162/467/8682/598/7057/9191/653/6498/6688/596/5054/4118
BP	GO:0090066	regulation of anatomical structure size	267	0.249375	1.50954	0.00449891	0.0318417	0.023984	1604	tags=29%	list=22%	signal=23%	5743/477/5341/10365/4897/4313/2982/147/6648/11151/246/2185/2335/9353/26999/53335/185/1385/490/5048/80031/81553/10435/1002/4133/5063/2876/2934/5580/2006/627/23499/6557/2717/1636/51466/2729/4137/120/2296/5997/3055/183/7873/3320/10109/3676/4544/7422/6709/7474/5962/6558/57026/148/143872/5802/134/7408/3357/10565/8440/3043/348/57580/59/7429/11034/57142/8864/26258/140469/10787/4504/5865/3071/7454
BP	GO:0050807	regulation of synapse organization	165	0.279312	1.63535	0.00450792	0.0318674	0.0240033	2993	tags=57%	list=41%	signal=35%	4139/4897/84189/11122/9456/79953/8828/2213/54209/2185/26999/547/5048/1000/51104/2239/2534/54910/8404/5063/627/6616/1981/1627/7474/9040/5789/11202/55737/57026/81926/4208/5802/55752/23613/7779/116987/10611/4038/84628/26052/348/5770/8128/57142/27067/347730/23657/4915/147381/3556/441381/23191/54674/54413/339398/23768/7058/2047/144165/391/6405/64218/10507/7097/7124/57633/22899/2823/64084/85358/154796/…
BP	GO:0072163	mesonephric epithelium development	63	0.350772	1.81471	0.00455656	0.0320913	0.0241719	1109	tags=33%	list=15%	signal=29%	10409/9353/9500/7481/2719/6608/30812/9244/8642/650/2296/26585/183/847/3911/3611/7422/6943/4072/7490/2625
BP	GO:0072164	mesonephric tubule development	63	0.350772	1.81471	0.00455656	0.0320913	0.0241719	1109	tags=33%	list=15%	signal=29%	10409/9353/9500/7481/2719/6608/30812/9244/8642/650/2296/26585/183/847/3911/3611/7422/6943/4072/7490/2625
BP	GO:1990266	neutrophil migration	72	0.341538	1.79462	0.00456125	0.0320913	0.0241719	2474	tags=51%	list=34%	signal=34%	5880/3579/3958/1441/6850/719/6280/6279/2813/57126/3627/9353/27202/4192/3553/1803/2207/1800/3554/3552/57580/57142/3929/3071/5657/6372/6288/101/728/3689/83700/5294/6376/2921/6348/683/54210
MF	GO:0008237	metallopeptidase activity	82	0.329921	1.76701	0.0045472	0.0320913	0.0241719	2251	tags=48%	list=31%	signal=33%	4323/4318/4313/1368/11096/4321/4317/10404/2028/10213/1636/79805/60676/81794/388630/170691/1800/80332/649/9510/8745/8728/11093/23203/11174/4314/9635/9629/4319/1359/9986/63929/11095/290/101/51752/4322/22846/170689
BP	GO:0035082	axoneme assembly	27	-0.311054	-2.12614	0.00458406	0.0321992	0.0242533	3001	tags=78%	list=41%	signal=46%	79819/54768/55779/126820/80217/80127/92749/84229/64446/6101/56171/79582/27148/255101/164781/644890/11092/286207/25876/8632/27019
BP	GO:0045600	positive regulation of fat cell differentiation	36	0.413699	1.90324	0.00458746	0.0321992	0.0242533	1031	tags=36%	list=14%	signal=31%	83643/5743/1385/7704/6591/7538/1051/6789/650/9580/677/3398/1050
BP	GO:0006123	mitochondrial electron transport cytochrome c to oxygen	15	0.532766	1.84133	0.00460105	0.0322564	0.0242963	3122	tags=93%	list=42%	signal=54%	1337/1340/84701/1349/54205/1329/1350/4697/1347/1327/1345/1351/9377/1339
MF	GO:0043394	proteoglycan binding	23	0.484033	1.95348	0.00462107	0.0323381	0.0243578	1309	tags=48%	list=18%	signal=39%	5788/10457/2335/9353/3075/3371/1508/5802/348/7057/129804
MF	GO:0004866	endopeptidase inhibitor activity	77	0.339974	1.80534	0.00462362	0.0323381	0.0243578	1304	tags=32%	list=18%	signal=27%	2597/718/6590/12/135228/720/7076/3697/5858/5270/5273/7035/11005/51377/1476/183/871/56925/7078/5269/6692/9491/80760/7057/140686
MF	GO:0046914	transition metal ion binding	432	0.230713	1.43203	0.00464763	0.0324676	0.0244554	1738	tags=29%	list=24%	signal=24%	1571/3934/7018/4323/4318/8993/4313/1368/10125/57048/9759/11096/9023/2099/4321/7076/6648/26/5579/6280/4317/6279/79698/5169/246/1396/339/166336/3039/64324/25862/4015/56603/760/9215/51110/8609/57590/5371/130013/2028/2104/4017/5168/7498/10868/23414/7189/5740/1636/440730/2495/9572/9970/55016/5167/2817/4929/60676/316/1580/811/1800/7067/80332/283208/4016/649/2058/2624/1036/2063/10536/9510/200424/7490/35…
BP	GO:0099560	synaptic membrane adhesion	14	0.534468	1.82263	0.0046693	0.0325806	0.0245405	1795	tags=64%	list=24%	signal=49%	57689/2239/8404/5789/26011/5802/84628/3556/1004
BP	GO:0030003	intracellular monoatomic cation homeostasis	242	0.257754	1.5519	0.00472199	0.0328708	0.0247591	1697	tags=31%	list=23%	signal=25%	581/477/7018/187/5788/8804/309/51606/7222/6352/481/5579/6354/482/11151/3627/2185/79689/4756/523/4067/490/84286/760/9885/5371/5745/6547/2495/9472/7052/5314/6556/3162/7178/1729/2316/811/23236/7474/6558/783/10539/506/1080/3552/7779/8671/134/26504/252839/3357/80762/83959/5330/348/6263/57644/130733/1535/9296/6549/151176/596/57419/221074/4502/4504/1193/3932/567/57817/114/930/1649
BP	GO:0031399	regulation of protein modification process	474	0.228562	1.42328	0.00472199	0.0328708	0.0247591	2234	tags=37%	list=30%	signal=28%	50507/3479/718/1116/5788/4318/6850/55024/10125/27250/142679/57761/11122/9759/10457/56271/5563/2950/3309/3326/1026/11006/7448/54209/2185/2335/9353/100133941/2295/595/28984/5906/4067/64324/2534/2690/10363/3303/3301/51719/5795/5371/2034/6608/5329/5580/5168/7498/6091/2192/4908/8817/340485/10010/7189/4254/6547/1636/6789/2729/4137/116496/285671/5167/650/55689/100506658/5997/26585/3553/64943/11221/183/3…
BP	GO:0010829	negative regulation of D-glucose transmembrane transport	14	0.533552	1.8195	0.00475996	0.0330963	0.0249289	2216	tags=71%	list=30%	signal=50%	2171/5579/1636/5167/3553/2887/8682/344901/6248/7124
BP	GO:0003206	cardiac chamber morphogenesis	79	0.330429	1.76159	0.00477647	0.0331721	0.024986	2535	tags=54%	list=34%	signal=36%	187/8828/9353/6664/4036/7481/6608/7472/6091/2274/23414/2022/57211/650/2296/7168/6909/57493/6659/9510/4208/7139/2625/4607/653/90/58495/7010/4193/657/6910/3491/55636/9241/4853/5629/10512/1832/7134/3084/5457/26508/23462
BP	GO:0001959	regulation of cytokine-mediated signaling pathway	97	0.311982	1.71088	0.00478412	0.0331863	0.0249968	1464	tags=31%	list=20%	signal=25%	7850/83643/5788/6850/841/6352/4321/2950/1435/4317/54209/9353/100133941/7852/5048/9470/3303/6091/10010/1893/9261/3557/7474/3554/558/9641/10062/25939/5770/26058
CC	GO:0097546	ciliary base	18	-0.379481	-1.93638	0.00484047	0.0334062	0.0251624	3808	tags=94%	list=52%	signal=46%	90410/5573/5577/137392/1183/112942/22858/51684/57562/3754/2736/3766/11092/5567/51098/8100/3784
BP	GO:0002711	positive regulation of T cell mediated immunity	36	0.412265	1.89664	0.0048268	0.0334062	0.0251624	1988	tags=56%	list=27%	signal=41%	5788/924/7189/975/1604/3553/3329/3554/2625/8809/10865/30009/567/3593/135250/912/51571/50943/9390/84861
BP	GO:0031294	lymphocyte costimulation	31	0.424599	1.86923	0.00484041	0.0334062	0.0251624	1669	tags=48%	list=23%	signal=38%	29851/11006/100133941/4067/2534/3956/975/1947/1803/940/916/22914/6693/3932/942
BP	GO:0031295	T cell costimulation	31	0.424599	1.86923	0.00484041	0.0334062	0.0251624	1669	tags=48%	list=23%	signal=38%	29851/11006/100133941/4067/2534/3956/975/1947/1803/940/916/22914/6693/3932/942
BP	GO:0032635	interleukin-6 production	104	0.309231	1.70661	0.00484964	0.0334062	0.0251624	2287	tags=46%	list=31%	signal=32%	10365/6850/6774/55024/338382/26137/5603/11006/54209/27202/84868/7189/1051/7305/10417/9261/3553/140885/3329/81622/1660/961/7474/3552/3635/8808/64170/1535/64581/3929/10865/3071/5004/5450/3556/50943/199/1445/90865/3570/5724/5777/7097/7098/7124/7291/6376/4023
BP	GO:0032675	regulation of interleukin-6 production	104	0.309231	1.70661	0.00484964	0.0334062	0.0251624	2287	tags=46%	list=31%	signal=32%	10365/6850/6774/55024/338382/26137/5603/11006/54209/27202/84868/7189/1051/7305/10417/9261/3553/140885/3329/81622/1660/961/7474/3552/3635/8808/64170/1535/64581/3929/10865/3071/5004/5450/3556/50943/199/1445/90865/3570/5724/5777/7097/7098/7124/7291/6376/4023
BP	GO:0034763	negative regulation of transmembrane transport	67	0.337578	1.76026	0.00485788	0.033424	0.0251758	1652	tags=37%	list=22%	signal=29%	477/2171/4318/5579/51719/91404/1636/5167/5997/3553/183/7351/4947/2887/23704/7779/5999/8682/7057/2859/596/8501/344901/1193/57817
BP	GO:0048678	response to axon injury	40	0.396864	1.86935	0.00487005	0.0334628	0.025205	1478	tags=40%	list=20%	signal=32%	581/4313/6648/54209/4756/4067/3371/7305/9315/2316/558/5802/3776/3745/349667/596
BP	GO:0048608	reproductive structure development	151	0.28119	1.6339	0.00488046	0.0334628	0.025205	1030	tags=25%	list=14%	signal=22%	581/10409/718/4323/4313/23213/2099/56729/1396/9353/5798/2295/3148/5270/4036/8648/3371/23414/30812/4254/1636/1051/5156/2288/2296/10461/22836/2316/5660/7422/7474/51742/6943/26471/9510/558/7490/3552
CC	GO:1902495	transmembrane transporter complex	213	0.260124	1.55184	0.00487558	0.0334628	0.025205	3317	tags=62%	list=45%	signal=35%	477/140738/84419/51606/1337/7222/3762/481/6280/482/4710/2185/1340/440567/523/3790/84701/56479/91404/55800/6332/80727/9472/6616/784/1349/776/783/23704/506/1080/1537/55248/3756/4705/3776/285175/20/3745/6263/6328/51079/9296/4713/8514/6326/6323/1193/9629/57406/79714/3744/3763/80333/5350/6330/440699/514/3742/6338/1536/3759/3778/7225/126129/1139/125965/55107/6324/9132/2890/2892/8913/2900/27089/488/3748…
CC	GO:0005581	collagen trimer	54	0.366436	1.83914	0.00492879	0.0337181	0.0253973	816	tags=31%	list=11%	signal=28%	713/6441/1281/712/114905/1295/4015/1297/1286/1277/1278/1284/1282/653509/8685/114898/85301
BP	GO:0033033	negative regulation of myeloid cell apoptotic process	12	0.567305	1.82488	0.00493478	0.0337181	0.0253973	1478	tags=58%	list=20%	signal=47%	3579/6352/6591/4254/4282/3707/596
BP	GO:0010955	negative regulation of protein processing	12	0.567228	1.82463	0.00493478	0.0337181	0.0253973	1711	tags=67%	list=23%	signal=51%	7850/5270/2619/7057/5327/5054/4193/5328
BP	GO:0032623	interleukin-2 production	45	0.389083	1.88289	0.00499653	0.0338409	0.0254898	1669	tags=44%	list=23%	signal=35%	5788/6441/11006/84868/301/7189/7538/5588/3553/940/861/3552/64170/2625/947/64581/916/920/30009/942
BP	GO:0032663	regulation of interleukin-2 production	45	0.389083	1.88289	0.00499653	0.0338409	0.0254898	1669	tags=44%	list=23%	signal=35%	5788/6441/11006/84868/301/7189/7538/5588/3553/940/861/3552/64170/2625/947/64581/916/920/30009/942
BP	GO:0009135	purine nucleoside diphosphate metabolic process	55	0.36316	1.83101	0.0049908	0.0338409	0.0254898	1069	tags=29%	list=14%	signal=25%	3479/2597/3939/6774/26137/9759/5230/5563/203/5315/7351/226/9611/26471/5223/8671
BP	GO:0009179	purine ribonucleoside diphosphate metabolic process	55	0.36316	1.83101	0.0049908	0.0338409	0.0254898	1069	tags=29%	list=14%	signal=25%	3479/2597/3939/6774/26137/9759/5230/5563/203/5315/7351/226/9611/26471/5223/8671
BP	GO:0097284	hepatocyte apoptotic process	12	0.56546	1.81894	0.00502701	0.0338409	0.0254898	1286	tags=58%	list=17%	signal=48%	5563/8837/2934/1386/6789/839/598
BP	GO:0032479	regulation of type I interferon production	65	0.348946	1.81089	0.00501088	0.0338409	0.0254898	1076	tags=31%	list=15%	signal=27%	2597/6850/26137/10621/4321/929/3148/84868/55593/6675/10010/7189/7305/6772/3320/140885/3329/1660/5802/9641
BP	GO:0032606	type I interferon production	65	0.348946	1.81089	0.00501088	0.0338409	0.0254898	1076	tags=31%	list=15%	signal=27%	2597/6850/26137/10621/4321/929/3148/84868/55593/6675/10010/7189/7305/6772/3320/140885/3329/1660/5802/9641
BP	GO:0009185	ribonucleoside diphosphate metabolic process	60	0.351795	1.80234	0.00498044	0.0338409	0.0254898	1069	tags=28%	list=14%	signal=24%	3479/2597/3939/6774/26137/9759/5230/5563/957/203/5315/7351/226/9611/26471/5223/8671
BP	GO:0060349	bone morphogenesis	56	0.353594	1.78702	0.00499599	0.0338409	0.0254898	1003	tags=32%	list=14%	signal=28%	4323/1281/158326/4209/249/2690/162466/56603/1277/8817/1386/2296/60676/871/85301/4054/7043/4208
MF	GO:0002020	protease binding	72	0.336882	1.77016	0.0050212	0.0338409	0.0254898	3531	tags=74%	list=48%	signal=39%	6402/55024/7076/1281/57126/2335/5858/8837/1277/1278/1893/1476/4282/9644/2208/1803/5660/5269/3554/7273/7057/596/2191/3815/5054/4915/117584/147372/3690/7124/1475/6531/2/7450/10752/8996/624/3688/8797/11315/302/2152/29108/5265/3949/1471/7415/7341/8780/6717/7077/55829/7917
BP	GO:0042476	odontogenesis	67	0.337503	1.75988	0.00501088	0.0338409	0.0254898	1343	tags=33%	list=18%	signal=27%	581/1441/51176/1435/5579/249/1277/1278/3371/6608/7189/5156/650/2296/3911/3694/7043/1080/26504/10018/4038/947
BP	GO:0051250	negative regulation of lymphocyte activation	103	0.309898	1.70581	0.00500002	0.0338409	0.0254898	1669	tags=36%	list=23%	signal=28%	3958/8993/55024/10457/6441/11006/2213/969/4332/6664/4067/84868/3956/4192/301/1051/7305/8654/10461/7356/861/55824/558/3398/3635/80762/3142/8995/6385/387597/441478/6693/116449/30009/5320/3624/942
BP	GO:0048568	embryonic organ development	222	0.256022	1.53268	0.00502445	0.0338409	0.0254898	2583	tags=47%	list=35%	signal=32%	187/4323/51176/841/84189/4237/6664/2295/3202/8648/7481/2034/6608/7472/8463/23414/2202/3215/8516/4254/64321/2022/1051/6789/5156/79805/2296/9496/6134/6909/2186/7422/7474/6943/4522/7043/2624/10194/677/4208/4646/3398/1050/2201/3214/2625/5396/6692/3142/10763/5079/1028/653/2487/6615/140469/90/8575/58495/9935/100/3815/3976/6299/4760/2885/51362/8092/657/4435/29072/7003/643226/51384/4087/6768/11078/3491/5…
CC	GO:0044665	MLL1/2 complex	18	-0.378197	-1.92983	0.0050328	0.0338414	0.0254902	3277	tags=83%	list=44%	signal=46%	6880/8607/84661/4221/125476/5929/6045/11091/23269/51230/6874/26168/6879/4297/27043
BP	GO:2000106	regulation of leukocyte apoptotic process	56	0.353473	1.78641	0.00507345	0.0340761	0.025667	1723	tags=39%	list=23%	signal=30%	3579/581/3958/6352/4067/301/4254/4282/5588/10461/7474/4208/558/3707/10018/598/5896/596/22920/100/939/23657
BP	GO:0033260	nuclear DNA replication	13	-0.47237	-2.11284	0.00512376	0.0342374	0.0257885	2274	tags=85%	list=31%	signal=59%	7013/4172/4175/5888/54617/5111/9837/51507/604/64785/7083
BP	GO:0044786	cell cycle DNA replication	13	-0.47237	-2.11284	0.00512376	0.0342374	0.0257885	2274	tags=85%	list=31%	signal=59%	7013/4172/4175/5888/54617/5111/9837/51507/604/64785/7083
BP	GO:0060998	regulation of dendritic spine development	25	0.454703	1.88572	0.00512636	0.0342374	0.0257885	1454	tags=48%	list=20%	signal=39%	547/5048/1902/1627/5789/4208/5802/23613/7779/26052/348/27067
BP	GO:0046889	positive regulation of lipid biosynthetic process	40	0.395483	1.86285	0.0051076	0.0342374	0.0257885	1274	tags=35%	list=17%	signal=29%	83643/5743/26137/2181/225/221395/1385/5580/9572/3553/3552/3357/10062/348
CC	GO:0043202	lysosomal lumen	52	0.355625	1.7692	0.00511067	0.0342374	0.0257885	1354	tags=37%	list=18%	signal=30%	3312/2239/3425/2719/1508/1634/1509/2717/2817/3320/6383/633/5660/1515/2992/2331/53/6385/5549
CC	GO:0005657	replication fork	19	-0.383001	-2.08187	0.00514871	0.0342473	0.0257959	2262	tags=74%	list=31%	signal=51%	4172/5558/2073/50485/84083/142/55388/7158/5111/51507/604/5425/253714/11169
BP	GO:0048799	animal organ maturation	16	0.532924	1.89643	0.00515675	0.0342473	0.0257959	1109	tags=50%	list=15%	signal=43%	3479/7704/162466/359845/8642/650/26585/2625
BP	GO:0006809	nitric oxide biosynthetic process	46	0.376085	1.82892	0.00514302	0.0342473	0.0257959	1359	tags=37%	list=18%	signal=30%	5743/10365/2099/6648/3326/2185/1191/5740/2717/3553/3320/140885/445/961/3043/348/64581
BP	GO:0006090	pyruvate metabolic process	55	0.362657	1.82848	0.00514555	0.0342473	0.0257959	1069	tags=29%	list=14%	signal=25%	3479/2597/3939/6774/26137/9759/5230/5563/5091/5315/7351/226/9611/26471/5223/8671
MF	GO:0070888	E-box binding	18	0.489403	1.8069	0.00515596	0.0342473	0.0257959	2390	tags=72%	list=32%	signal=49%	8553/6591/9572/6943/2625/6939/6615/4760/63974/4618/6938/7291/196
BP	GO:0019229	regulation of vasoconstriction	40	0.394631	1.85883	0.00518679	0.0344082	0.0259171	1008	tags=32%	list=14%	signal=28%	5743/477/4313/147/185/490/1636/120/183/3676/4544/148/143872
BP	GO:0001763	morphogenesis of a branching structure	131	0.29068	1.65937	0.0051941	0.0344182	0.0259246	2243	tags=44%	list=30%	signal=31%	4323/51176/23213/2099/1435/9353/53335/3202/9500/473/2719/5371/4192/3371/6608/7472/6591/1282/30812/2022/1512/6789/8642/650/26585/7052/5314/183/6909/3911/3611/7422/7474/6943/7490/6692/1305/57142/596/441478/90/6299/2885/6663/4435/5058/29072/340419/6768/284217/9241/5361/5629/84870/9723/10253/7124/10512
BP	GO:0046434	organophosphate catabolic process	117	0.293668	1.64974	0.00520979	0.0344836	0.0259739	1081	tags=26%	list=15%	signal=22%	3479/2597/3939/7941/6774/26137/9759/5230/5563/5169/6996/957/5315/5580/5168/7498/8654/5167/5321/7351/226/9611/11332/23236/57026/26471/5223/3251/8671/4245
BP	GO:0051092	positive regulation of NF-kappaB transcription factor activity	58	0.356074	1.80459	0.00523926	0.0346399	0.0260917	1418	tags=36%	list=19%	signal=29%	8807/338382/6280/6279/3303/8837/64320/1191/7189/5588/3553/183/1660/7474/64170/7188/8792/8995/8809/64581/28232
BP	GO:0007519	skeletal muscle tissue development	89	0.321037	1.74441	0.00527352	0.0348276	0.026233	1488	tags=35%	list=20%	signal=28%	27063/9456/10791/6664/4209/283149/56603/9215/8837/2876/6608/2006/30812/2817/84466/467/1827/10362/2353/6943/26471/4208/3142/1958/5079/10869/6498/92737/596/7832/93185
BP	GO:0046631	alpha-beta T cell activation	103	0.308498	1.6981	0.00530077	0.0349685	0.0263392	1669	tags=35%	list=23%	signal=27%	3958/5788/51176/6850/6774/29851/11006/969/6775/7704/3956/301/1386/1051/5588/975/1604/940/861/2625/3707/80762/3142/8995/919/8809/596/100/916/4818/3071/6693/30009/10148/3593/942
BP	GO:0032729	positive regulation of type II interferon production	42	0.397668	1.89654	0.00532816	0.0351101	0.0264458	2216	tags=57%	list=30%	signal=40%	914/929/84868/3553/6556/3329/7474/3554/8809/64581/10865/51744/916/22914/3595/7294/10148/3593/3394/51571/729230/3606/7098/7124
BP	GO:0051606	detection of stimulus	95	0.305924	1.67219	0.00533851	0.0351393	0.0264678	1742	tags=37%	list=24%	signal=29%	63982/8993/5284/7222/6648/54209/7852/5270/1000/2534/5795/6608/1386/8406/2022/56925/1602/7043/2063/134/7273/25963/3776/5330/64581/3929/23596/2191/6323/50834/6957/3815/3777/912/143503
BP	GO:0046329	negative regulation of JNK cascade	23	0.480143	1.93779	0.00537041	0.03531	0.0265964	1142	tags=43%	list=15%	signal=37%	27250/142679/2950/5048/2122/3301/11221/140885/9611/64853
BP	GO:0070486	leukocyte aggregation	11	0.580611	1.81971	0.00538378	0.0353587	0.026633	713	tags=45%	list=10%	signal=41%	5880/6280/6279/960/3553
BP	GO:0060142	regulation of syncytium formation by plasma membrane fusion	16	0.531544	1.89151	0.00542579	0.0355558	0.0267815	612	tags=44%	list=8%	signal=40%	963/9518/54209/3627/8837/51177/7305
BP	GO:0034101	erythrocyte homeostasis	89	0.320504	1.74152	0.00542527	0.0355558	0.0267815	1663	tags=36%	list=23%	signal=28%	5880/5052/10365/6774/55646/221395/93974/3148/3202/4067/3303/2034/7538/6772/3162/7067/7422/2624/677/558/3398/3635/2625/22985/51621/6688/9935/3071/6005/567/3815/3624
BP	GO:0006518	peptide metabolic process	33	0.419325	1.89354	0.00544951	0.0356717	0.0268688	1723	tags=48%	list=23%	signal=37%	1368/1215/10404/4780/2028/1636/1512/2729/5066/11093/10314/2937/6506/26258/4258/23657
BP	GO:0043269	regulation of monoatomic ion transport	231	0.252263	1.51546	0.0054656	0.0357375	0.0269184	2250	tags=39%	list=31%	signal=28%	581/5743/3958/477/7018/187/4318/931/8832/2273/7222/3762/6352/481/9456/6347/482/11151/54209/3627/2185/7852/81671/5270/4067/490/3790/2534/1272/760/51719/5371/6000/91404/128414/1636/55800/9472/5664/784/183/7351/79026/1729/2316/776/783/23704/1080/7779/2040/4638/134/5999/51297/1535/7871/2859/596/8514/53827/1193/920/567/57817/2257/930/8737/3763/80333/57120/5350/5024/6330/440699/9465/6865/729230/55636/1…
BP	GO:0060840	artery development	66	0.343897	1.7877	0.00547551	0.0357628	0.0269375	1411	tags=35%	list=19%	signal=28%	3248/187/1281/221395/4036/4015/7481/4192/30008/6091/2022/2296/6909/60681/7422/4016/6659/4638/5396/11064/348/57142/11174
MF	GO:0001653	peptide receptor activity	38	0.403965	1.88236	0.00551527	0.0359829	0.0271032	2238	tags=58%	list=30%	signal=41%	187/2357/185/2831/1241/2358/5745/10203/10266/6754/79627/128674/4883/29909/2151/84109/680/4988/2740/6865/1910/3973
BP	GO:0045576	mast cell activation	28	0.443507	1.89463	0.00555802	0.0362219	0.0272833	2236	tags=61%	list=30%	signal=42%	5880/6850/10125/8832/5169/4067/8773/2624/116449/3815/2242/2268/3566/5294/5777/6813/26762
BP	GO:0060761	negative regulation of response to cytokine stimulus	48	0.37348	1.82905	0.00558467	0.0363556	0.027384	671	tags=27%	list=9%	signal=25%	7850/83643/5788/6352/4321/2950/54209/9353/9470/6091/10010/1893/3557
BP	GO:0006858	extracellular transport	20	-0.364731	-2.07632	0.0056289	0.0365493	0.0275299	2858	tags=80%	list=39%	signal=49%	8701/361/152110/25911/55582/80217/8382/79582/27148/164781/200373/29922/55811/25790/92714/27019
BP	GO:0010573	vascular endothelial growth factor production	25	0.452669	1.87729	0.00562649	0.0365493	0.0275299	1030	tags=36%	list=14%	signal=31%	5743/718/6774/23213/719/55959/284340/3553/3552
BP	GO:0002532	production of molecular mediator involved in inflammatory response	53	0.369488	1.84471	0.00563911	0.0365493	0.0275299	2216	tags=49%	list=30%	signal=35%	7850/27159/6850/6774/27250/225/6280/11006/54209/4067/8773/11221/140885/113/64170/241/64581/3929/5054/5601/7001/2896/3566/653361/7098/7124
BP	GO:0051962	positive regulation of nervous system development	144	0.281751	1.62594	0.00563684	0.0365493	0.0275299	2263	tags=46%	list=31%	signal=32%	84189/79953/2335/9353/53335/6664/7852/5270/4067/4036/5048/1002/4192/6608/7472/6091/627/30812/23499/1636/4137/650/3553/7052/23363/1627/7422/5789/26011/51199/3398/7779/7520/6692/8128/6498/27067/347730/3815/3976/140578/4915/147381/3556/441381/6663/23191/9037/54674/54413/339398/23768/4988/22891/7058/2047/8322/90865/5764/64218/10507/7097/7124/57633/6376/50937
BP	GO:0002862	negative regulation of inflammatory response to antigenic stimulus	21	0.471332	1.82624	0.00567012	0.0366866	0.0276332	1668	tags=52%	list=23%	signal=41%	6850/2213/54209/2778/4067/2534/2876/3055/10769/6693/3593
BP	GO:0060263	regulation of respiratory burst	12	0.562114	1.80818	0.00567267	0.0366866	0.0276332	2175	tags=75%	list=29%	signal=53%	5880/6280/11221/10811/64581/3929/3512/2896/653361
BP	GO:0002700	regulation of production of molecular mediator of immune response	102	0.301297	1.65579	0.00568244	0.0367097	0.0276506	2220	tags=46%	list=30%	signal=33%	5788/6850/11006/2213/51237/924/10225/11005/7189/4282/10417/975/9261/1604/3553/940/9865/7474/7043/3554/558/64170/2625/80762/8809/64581/57142/10865/51744/116449/30009/567/3815/942/54537/50943/441168/284/383/729230/3606/90865/3566/5585/7098/7124/7291
BP	GO:0051965	positive regulation of synapse assembly	34	0.404503	1.84181	0.00572279	0.0369301	0.0278166	2726	tags=71%	list=37%	signal=45%	84189/79953/627/5789/8128/27067/347730/4915/147381/3556/441381/54674/54413/339398/23768/7058/2047/64218/10507/57633/64084/9378/347731/40
BP	GO:0002690	positive regulation of leukocyte chemotaxis	60	0.349015	1.7881	0.00582981	0.0375797	0.028306	895	tags=28%	list=12%	signal=25%	5880/3579/7941/6352/1435/719/6354/3627/2185/284340/5795/4192/2358/2277/811/7422/7474
BP	GO:0019748	secondary metabolic process	23	0.477109	1.92554	0.00586997	0.0377314	0.0284203	1874	tags=61%	list=25%	signal=46%	2327/1374/4780/130013/2326/7474/23596/596/1548/57016/23657/1576/1109/4435
BP	GO:0030512	negative regulation of transforming growth factor beta receptor signaling pathway	53	0.367333	1.83395	0.00587245	0.0377314	0.0284203	1551	tags=40%	list=21%	signal=32%	135228/8483/3309/9518/283149/3303/2022/650/25805/51742/5654/23625/7043/2201/11117/26036/9719/56937/58533/6498/58495
BP	GO:0060047	heart contraction	143	0.286552	1.6517	0.00586082	0.0377314	0.0284203	1714	tags=34%	list=23%	signal=27%	477/1674/147/3762/6271/481/482/70/6445/7852/490/2034/2876/2934/10052/6547/1636/55800/6332/8654/5997/183/3320/7168/6909/2316/776/7067/783/10539/148/23704/7139/134/5999/7273/4607/57644/6328/5770/1573/6326/100/6323/1193/4635/2257/4193/8862
BP	GO:0003205	cardiac chamber development	100	0.304057	1.67205	0.0058963	0.0378437	0.0285048	2566	tags=52%	list=35%	signal=34%	187/8828/9353/6664/4036/7481/6608/7472/6091/2274/23414/129446/2022/57211/650/2296/7168/6909/57493/7474/6659/9510/4208/7139/2625/11064/4607/3776/8543/653/11174/90/58495/7010/4193/6299/657/6910/3491/55636/9241/4853/5138/5629/10512/1832/7134/3084/5457/26508/23462/4666
BP	GO:0006468	protein phosphorylation	473	0.228672	1.4237	0.00591176	0.0379018	0.0285486	2429	tags=41%	list=33%	signal=29%	4139/50507/3479/718/1116/5788/4318/6850/55024/10125/27250/9448/9535/142679/57761/11122/10783/10457/5563/5603/2950/6347/1026/5579/11006/7448/54209/2185/2335/9353/10595/100133941/595/28984/5906/1385/4067/64324/2534/2690/3301/51719/5795/6608/5329/5580/5168/7498/6091/2192/4908/8817/1386/7189/146057/2202/4254/6547/6789/5156/5588/116496/5167/9261/650/100506658/5599/5997/26585/10461/3553/3055/64943/1122…
BP	GO:0032753	positive regulation of interleukin-4 production	17	0.52244	1.89549	0.00593206	0.0379908	0.0286156	2161	tags=71%	list=29%	signal=50%	6850/84868/1051/5588/940/2207/2625/916/942/3556/50943/90865
BP	GO:0003128	heart field specification	11	0.57661	1.80717	0.00594555	0.0380361	0.0286498	1003	tags=55%	list=14%	signal=47%	4036/7481/6091/650/7474/4208
BP	GO:0032091	negative regulation of protein binding	27	0.446961	1.88729	0.00600292	0.0383204	0.0288639	1643	tags=48%	list=22%	signal=38%	581/6590/1026/4133/146057/5599/3676/5899/1454/3300/10763/2801/567
MF	GO:0001221	transcription coregulator binding	56	0.350467	1.77122	0.00600292	0.0383204	0.0288639	1476	tags=36%	list=20%	signal=29%	51176/10783/84181/2099/7704/4780/2034/8463/6772/9572/57649/861/84146/2353/23625/2624/2625/4005/79813/8864
BP	GO:0046034	ATP metabolic process	126	0.288004	1.63889	0.00601014	0.0383251	0.0288675	3341	tags=64%	list=45%	signal=36%	3479/477/2597/3939/6774/26137/9759/3312/481/5230/5563/4710/5169/54209/93974/523/3303/203/5315/5167/7351/226/9611/26471/5223/29789/506/8671/4705/51079/4713/26258/2027/63979/514/3304/863/80201/7114/4696/517/10632/9551/4698/4702/509/4700/4714/516/522/3099/539/54539/4624/513/10476/4695/4694/4718/4715/518/351/4711/515/1291/706/4716/126328/4708/55753/4717/4712/4726/7415/51024/4706/55967/4709/4731/3091/…
BP	GO:0008406	gonad development	110	0.288998	1.6095	0.00604043	0.0384769	0.0289818	1186	tags=27%	list=16%	signal=23%	581/10409/4323/4313/2099/56729/9353/5798/3148/4036/8648/23414/30812/4254/1636/1051/5156/2296/22836/2316/7422/7474/51742/6943/26471/9510/7490/3552/2625/10018
BP	GO:0032306	regulation of prostaglandin secretion	10	0.597628	1.82578	0.00609898	0.0388081	0.0292313	1164	tags=60%	list=16%	signal=51%	2182/4282/5321/3553/3552/8792
BP	GO:0008637	apoptotic mitochondrial changes	61	0.349969	1.79849	0.00612596	0.0389379	0.029329	1286	tags=33%	list=17%	signal=27%	581/3479/4318/57048/6648/93974/3303/2876/5329/1191/1386/2729/3329/55737/2139/4000/665/90427/10018/598
MF	GO:0023026	MHC class II protein complex binding	16	0.527343	1.87657	0.00614324	0.0389642	0.0293488	748	tags=44%	list=10%	signal=39%	931/3312/481/3326/5315/975/3320
BP	GO:0002888	positive regulation of myeloid leukocyte mediated immunity	13	0.556484	1.84213	0.00614146	0.0389642	0.0293488	2193	tags=77%	list=30%	signal=54%	718/3684/57126/7305/6688/26228/2209/383/3689/5724
BP	GO:0001779	natural killer cell differentiation	13	0.55435	1.83506	0.00623381	0.039461	0.029723	1013	tags=46%	list=14%	signal=40%	5788/8993/10125/10461/4783/558
BP	GO:0010565	regulation of ketone metabolic process	69	0.327143	1.70939	0.00623489	0.039461	0.029723	1546	tags=33%	list=21%	signal=27%	5743/2171/2327/57761/225/5230/9518/2168/1385/1374/3667/2326/9572/650/3553/9611/27122/10062/33/1958/653/151176/80025
MF	GO:0038191	neuropilin binding	15	0.521939	1.80391	0.0063321	0.0400334	0.0301542	2401	tags=80%	list=33%	signal=54%	54910/223117/9344/7422/5829/7869/9723/6405/64218/10507/10512/56920
BP	GO:0050871	positive regulation of B cell activation	36	0.404821	1.8624	0.00634263	0.0400573	0.0301722	1789	tags=47%	list=24%	signal=36%	4323/5788/6850/1026/4282/975/940/4208/3635/6688/596/100/3071/30009/939/57162/54537
BP	GO:0050850	positive regulation of calcium-mediated signaling	30	0.427038	1.85185	0.00637437	0.0401294	0.0302265	2477	tags=63%	list=34%	signal=42%	3479/5788/6850/54209/5795/5156/9472/29995/64581/100/916/920/5024/10523/7124/3973/6348/5159/3094
BP	GO:0050803	regulation of synapse structure or activity	167	0.273165	1.60109	0.00637066	0.0401294	0.0302265	2993	tags=56%	list=41%	signal=34%	4139/4897/84189/11122/9456/79953/8828/2213/54209/2185/26999/547/5048/1000/51104/2239/2534/54910/8404/5063/627/6616/1981/1627/7474/9040/5789/11202/55737/57026/81926/4208/5802/55752/23613/7779/116987/10611/4038/84628/26052/348/5770/8128/57142/27067/347730/23657/4915/147381/3556/441381/23191/54674/54413/339398/23768/7058/2047/144165/391/6405/64218/10507/7097/7124/57633/22899/2823/64084/85358/154796/…
BP	GO:0045859	regulation of protein kinase activity	201	0.255335	1.51524	0.00636428	0.0401294	0.0302265	2222	tags=40%	list=30%	signal=29%	50507/3479/1116/5788/10125/27250/142679/57761/11122/2950/1026/11006/2185/100133941/595/28984/5906/4067/2690/3301/51719/5795/5580/6091/4908/8817/7189/6547/5997/3553/11221/183/9344/56892/57493/7474/23531/894/5899/80243/10006/7520/64853/4921/8792/348/57580/7057/9555/1028/5770/55704/58533/4504/920/60/84722/900/114/9134/5058/104/4040/5871/284/3491/634/1436/1894/2268/1647/3690/5294/146850/5292/5629/707…
BP	GO:0032963	collagen metabolic process	65	0.342371	1.77676	0.00638789	0.0401718	0.0302584	1663	tags=38%	list=23%	signal=30%	4323/4318/4313/4321/7431/4317/28984/1277/1278/1508/2022/5118/871/4239/861/7043/10536/11117/4921/90993/2191/4314/5657/4319/3624
BP	GO:0090025	regulation of monocyte chemotaxis	23	0.473935	1.91273	0.0064528	0.0404844	0.0304939	705	tags=39%	list=10%	signal=35%	7941/6352/3627/9353/4067/284340/2358/100532736/26585
BP	GO:0055002	striated muscle cell development	93	0.311245	1.70235	0.00644811	0.0404844	0.0304939	1563	tags=34%	list=21%	signal=27%	3479/27063/9456/71/70/8470/221476/9215/8837/2876/6608/2274/5156/9472/5997/23363/7168/1827/7422/1466/4000/148/7139/10611/5999/7273/4607/4629/10398/92737/596/84665
BP	GO:0006874	intracellular calcium ion homeostasis	143	0.285006	1.6428	0.00645809	0.0404844	0.0304939	2357	tags=45%	list=32%	signal=32%	581/477/187/5788/309/7222/6352/481/5579/6354/11151/3627/2185/4067/490/9885/5371/5745/6547/9472/7052/5314/7178/1729/2316/811/23236/7474/783/7779/134/3357/5330/348/6263/57644/130733/1535/596/57419/1193/3932/114/930/1649/79054/51196/5350/23228/10523/729230/1234/55636/3690/5777/7070/7225/6357/3973/6376/1003/79572/1139/1230/6348
BP	GO:0097696	cell surface receptor signaling pathway via STAT	63	0.341218	1.76529	0.00647104	0.0405227	0.0305227	2217	tags=51%	list=30%	signal=36%	3479/5788/6774/11122/6352/6347/6775/2185/2690/387837/9244/6772/5789/8995/4249/3815/57817/3593/3976/4760/3454/729230/1437/1436/1439/1647/3600/3606/3570/5008/7124/7132
BP	GO:0045453	bone resorption	36	0.404062	1.8589	0.00650219	0.0406318	0.0306049	2167	tags=53%	list=29%	signal=37%	5880/50507/7018/6850/2185/54849/5745/7189/4054/3635/8792/1901/81501/57817/9842/101/1436/1445/3690
BP	GO:0051963	regulation of synapse assembly	85	0.317867	1.71588	0.0065008	0.0406318	0.0306049	2726	tags=58%	list=37%	signal=37%	4139/84189/79953/2185/26999/2239/54910/627/6616/1981/7474/9040/5789/55737/4208/5802/10611/4038/84628/5770/8128/57142/27067/347730/4915/147381/3556/441381/54674/54413/339398/23768/7058/2047/144165/391/64218/10507/7097/57633/22899/64084/9378/9423/347731/9201/4738/5818/40
BP	GO:0030888	regulation of B cell proliferation	34	0.401492	1.8281	0.00652317	0.0407199	0.0306713	1621	tags=44%	list=22%	signal=35%	5788/1026/2213/51237/4332/4067/4282/7305/975/4208/3635/596/100/3071/22806
MF	GO:0015932	nucleobase-containing compound transmembrane transporter activity	19	-0.37553	-2.04126	0.00654383	0.0408059	0.0307361	1588	tags=63%	list=22%	signal=50%	56262/114789/9153/8034/29957/3177/10057/63910/24145/56172/51092/6582
BP	GO:2001235	positive regulation of apoptotic signaling pathway	88	0.303715	1.64505	0.00657683	0.0409086	0.0308134	1712	tags=36%	list=23%	signal=28%	581/5788/4313/6280/6279/9500/51330/5371/5580/1191/8406/1512/6789/183/467/50486/6421/7474/26471/84231/10018/8440/8682/7057/6498/8575/5326/3932/4118/3624/1649/6201
MF	GO:0140297	DNA-binding transcription factor binding	231	0.249986	1.50178	0.00658101	0.0409086	0.0308134	1478	tags=27%	list=20%	signal=23%	51176/6774/8553/1063/11122/10783/55646/9759/27063/2099/5579/53335/3148/1385/64324/4209/6996/8648/3301/64320/9320/4780/2034/2274/23414/1386/30812/64321/6789/6672/2288/2296/4929/861/6909/2316/9611/811/1660/29841/2353/6943/862/6605/4774/2624/4208/85004/3398/1050/80139/23613/2625/5396/4792/7391/4005/6939/8543/947/6688/10865/596
BP	GO:1901699	cellular response to nitrogen compound	346	0.23335	1.4351	0.00658101	0.0409086	0.0308134	2513	tags=44%	list=34%	signal=30%	5743/3479/10365/6850/6774/57761/7431/2706/5579/9518/2213/51237/54209/9353/53335/185/1131/3158/2778/5906/4067/490/2534/2690/8648/760/9215/114882/8837/3667/5315/4780/5795/2358/5580/1509/3488/1636/7305/5156/5588/2729/9472/6772/5167/4929/10461/3553/7052/183/85397/7351/445/2782/1729/2308/3676/2316/1800/1660/839/23236/55737/2353/5899/57026/2887/2058/7412/677/4208/558/1080/7490/3357/4921/5999/7391/6506/…
BP	GO:0002523	leukocyte migration involved in inflammatory response	16	0.52517	1.86883	0.00659164	0.0409215	0.0308231	2240	tags=75%	list=30%	signal=52%	6280/6279/4192/57142/3929/6401/101/3689/83700/5764/7124/6376
BP	GO:0006687	glycosphingolipid metabolic process	34	0.40083	1.82508	0.0066032	0.0409215	0.0308231	1647	tags=44%	list=22%	signal=34%	581/256435/9215/5580/2717/7903/8702/8869/64781/20/338596/8128/8703/127550/3815
BP	GO:0033673	negative regulation of kinase activity	78	0.325367	1.73272	0.00660382	0.0409215	0.0308231	1416	tags=32%	list=19%	signal=26%	5788/27250/142679/57761/11122/2950/1026/11006/4067/3301/5795/6547/5997/3553/11221/183/57493/80243/64853/348/57580/9555/1028/5770/58533
BP	GO:0070613	regulation of protein processing	34	0.400381	1.82304	0.00668324	0.0413704	0.0311613	1711	tags=44%	list=23%	signal=34%	7850/4323/84236/6281/5270/2934/5329/4627/861/2619/7057/5327/5054/4193/5328
CC	GO:0045177	apical part of cell	236	0.253793	1.52617	0.00672973	0.0416147	0.0313453	2502	tags=46%	list=34%	signal=32%	7018/10149/481/9456/2813/482/71/5169/221395/2335/8470/2168/200958/2778/523/4036/1000/5108/27202/760/115019/960/1508/2028/301/5745/10568/8516/6557/8642/100506658/60676/1803/5314/3320/1800/5962/6558/4072/7412/23704/51199/4646/1080/3485/9963/25778/4921/55686/159963/83959/3776/3745/84612/947/5327/28232/22931/6549/8501/90/2191/2151/4118/114/7010/1464/338328/23657/115584/8170/5873/79629/9390/5337/6575/…
MF	GO:0005161	platelet-derived growth factor receptor binding	11	0.572001	1.79273	0.00678821	0.0418996	0.0315598	985	tags=55%	list=13%	signal=47%	4067/5795/2277/5156/7422/3554
BP	GO:0045454	cell redox homeostasis	26	0.428434	1.78531	0.00679344	0.0418996	0.0315598	948	tags=35%	list=13%	signal=30%	5052/51022/84181/2936/4780/2876/2729/6556/10539
MF	GO:0051861	glycolipid binding	18	0.481353	1.77718	0.00680237	0.0418996	0.0315598	2301	tags=67%	list=31%	signal=46%	6402/54209/4067/7873/5660/1800/25999/10026/6403/284217/7070/26253
BP	GO:0002009	morphogenesis of an epithelium	295	0.241036	1.46743	0.00680409	0.0418996	0.0315598	2258	tags=40%	list=31%	signal=29%	3579/187/4323/51176/4313/23213/2099/4321/1435/71/3627/9353/6664/7852/2295/3202/4036/9500/5048/760/54910/7481/2719/5371/4192/3371/960/116844/6608/7472/8463/6591/1282/7189/30812/64321/3488/2022/1512/6789/6772/8642/650/26585/7052/55612/5314/183/9496/6909/2316/3911/79630/3611/7422/7474/85407/6943/4522/4208/7490/3214/2625/7408/6692/4867/26146/6939/6385/8543/90102/653/596/2487/6615/441478/90/58495/2210…
BP	GO:0032231	regulation of actin filament bundle assembly	59	0.352901	1.79826	0.0068407	0.0420813	0.0316967	1394	tags=36%	list=19%	signal=29%	1490/5341/6281/71/8477/28984/1902/84952/51466/116985/7168/3925/2316/961/5962/7043/7429/6385/1901/90102/55704
MF	GO:0008528	G protein-coupled peptide receptor activity	37	0.392604	1.81333	0.00687897	0.042247	0.0318215	2238	tags=57%	list=30%	signal=40%	187/2357/185/2831/1241/2358/5745/10203/10266/6754/128674/4883/29909/2151/84109/680/4988/2740/6865/1910/3973
BP	GO:0000303	response to superoxide	18	0.480883	1.77544	0.00688903	0.042247	0.0318215	779	tags=39%	list=11%	signal=35%	5052/51022/6648/2176/4780/10516/7351
BP	GO:0000305	response to oxygen radical	18	0.480883	1.77544	0.00688903	0.042247	0.0318215	779	tags=39%	list=11%	signal=35%	5052/51022/6648/2176/4780/10516/7351
BP	GO:0008645	hexose transmembrane transport	67	0.328482	1.71283	0.00692339	0.0424138	0.0319472	1567	tags=34%	list=21%	signal=27%	3479/2171/718/57761/5579/114882/3667/2719/4780/1636/5167/100506658/3553/2887/25999/55600/6041/8682/6506/23596/151176/148808/344901
MF	GO:0061891	calcium ion sensor activity	10	-0.506117	-1.97278	0.00694041	0.0424742	0.0319926	2069	tags=80%	list=28%	signal=58%	80303/127833/57586/83849/143425/9066/148281/341359
BP	GO:0035966	response to topologically incorrect protein	84	0.306989	1.64981	0.00698553	0.0427062	0.0321674	1475	tags=32%	list=20%	signal=26%	581/84236/3312/3309/3326/10595/595/11080/3303/3301/4780/1191/7873/3320/871/467/3329/27248/3300/10133/10018/8440/7057/5770/90993/51528/8452
CC	GO:0098802	plasma membrane signaling receptor complex	95	0.300814	1.64425	0.00700441	0.0427774	0.032221	2446	tags=51%	list=33%	signal=34%	7018/6850/8807/8631/3684/2185/4067/3667/7189/8516/650/10203/3676/2316/10266/3694/11117/54518/7188/919/8809/90/916/920/925/974/6957/567/3682/57406/7187/214/657/9180/634/1437/1439/3570/3689/3690/5777/7097/9358/3683/126129/1139/2890/2892
BP	GO:0042743	hydrogen peroxide metabolic process	30	0.424596	1.84127	0.00703236	0.0428502	0.0322759	1569	tags=43%	list=21%	signal=34%	5880/5052/6648/3039/2534/2876/847/3240/10811/3043/1535/2878/4504
BP	GO:0042246	tissue regeneration	37	0.390749	1.80476	0.00703802	0.0428502	0.0322759	818	tags=32%	list=11%	signal=29%	3479/1026/10404/9215/8837/4192/2876/301/10631/975/11221/861
BP	GO:0043009	chordate embryonic development	320	0.235958	1.44197	0.00702717	0.0428502	0.0322759	1556	tags=28%	list=21%	signal=23%	3479/4323/51176/10365/841/23213/123920/343263/1281/1026/55224/729/221395/6664/55959/3202/4036/5954/8648/54910/7481/1277/2034/6608/7472/8463/5745/23414/1386/7189/23168/30812/10568/3215/64321/1051/6789/5156/9644/8642/79805/650/2296/4627/6909/57493/1627/60681/2186/7422/7474/85407/4522/7043/2624/285855/677/1050/3214/5362/7779/4245/10006/2625/7408/5396/6692/10018/1999/338596/6939/598/6385/8543/5079/10…
MF	GO:0048407	platelet-derived growth factor binding	10	0.592268	1.80941	0.00725153	0.0441048	0.0332208	617	tags=50%	list=8%	signal=46%	1281/1277/1278/1282/5156
BP	GO:0006040	amino sugar metabolic process	26	0.425767	1.77419	0.00737692	0.0447666	0.0337194	1439	tags=42%	list=20%	signal=34%	1116/27159/10164/9215/6675/91373/9435/216/4245/8534/80896
MF	GO:0051082	unfolded protein binding	70	0.327255	1.71546	0.0073824	0.0447666	0.0337194	1310	tags=33%	list=18%	signal=27%	3312/3309/3326/10595/11080/821/3303/3301/1410/1191/81572/3320/871/3329/811/27248/10383/10574/56886/3300/26515/10728/5202
BP	GO:1902904	negative regulation of supramolecular fiber organization	91	0.304939	1.66241	0.00738302	0.0447666	0.0337194	1393	tags=32%	list=19%	signal=26%	9535/3312/11151/54209/9353/10297/8874/84952/4133/2934/1410/5580/1191/146057/120/2288/116985/3925/6709/5962/25999/11117/10565/348/5202/7429/1901/22919/90102
BP	GO:0009749	response to glucose	86	0.308538	1.66676	0.00740562	0.0448578	0.033788	1307	tags=30%	list=18%	signal=25%	50507/7447/26137/1215/5563/5579/54209/2185/5798/8609/1277/2876/9462/1636/2729/9572/7351/10628/6659/1080/7391/2752/3170/3745/7057/1958
BP	GO:0003018	vascular process in circulatory system	158	0.265445	1.54976	0.00741379	0.0448614	0.0337907	1548	tags=28%	list=21%	signal=23%	3579/5743/477/2171/10365/4313/2982/147/6648/482/9194/9353/185/490/4036/5795/2876/1636/2729/92745/120/100506658/2296/5997/183/7873/3676/4544/10266/7422/6558/148/143872/8671/134/3357/20/3043/6506/348/59/28232/8864/26258/57419
BP	GO:0033628	regulation of cell adhesion mediated by integrin	33	0.410136	1.85205	0.00746782	0.0450872	0.0339608	2348	tags=61%	list=32%	signal=41%	6850/8631/6352/4067/6591/340485/55612/1803/100/916/3071/5054/3976/5328/83706/3690/83700/5294/5777/1969
BP	GO:1901292	nucleoside phosphate catabolic process	89	0.314181	1.70716	0.00747395	0.0450872	0.0339608	1081	tags=27%	list=15%	signal=23%	3479/2597/3939/6774/26137/9759/5230/5563/5169/6996/957/5315/7498/8654/5167/7351/226/9611/11332/26471/5223/3251/8671/4245
BP	GO:0050801	monoatomic ion homeostasis	287	0.243991	1.48336	0.00747334	0.0450872	0.0339608	1697	tags=30%	list=23%	signal=24%	581/477/7018/187/5788/8804/309/51606/7222/6352/481/6648/5579/6354/482/11151/3627/2185/79689/4756/185/523/4067/490/249/84286/760/9885/5371/2034/5745/6557/6547/2495/6332/9472/5664/7052/5314/183/6556/3162/7178/1729/2316/811/23236/7474/6558/783/10539/506/1080/3552/7779/8671/134/26504/252839/3357/80762/83959/285175/5330/348/6263/57644/130733/1535/9296/26505/6549/151176/596/57419/221074/4502/4504/1193/…
BP	GO:0043393	regulation of protein binding	54	0.355239	1.78294	0.00749017	0.0451391	0.0339999	1518	tags=35%	list=21%	signal=28%	581/6590/4318/57761/9759/1026/7448/4133/627/146057/5599/3676/25805/5899/1454/3300/10763/64388/2801
CC	GO:0070069	cytochrome complex	25	0.444751	1.84445	0.00754363	0.0454151	0.0342078	2850	tags=76%	list=39%	signal=47%	84419/1337/1340/440567/84701/1349/1537/125965/27089/56901/1329/1350/4697/1347/1327/1345/1351/10975/9377
BP	GO:0034113	heterotypic cell-cell adhesion	40	0.383898	1.80828	0.00756238	0.0454818	0.034258	2276	tags=55%	list=31%	signal=38%	914/5788/4897/8631/3684/960/3557/3553/140885/3676/961/7412/3932/912/338879/3689/3690/83700/7070/7124/1829/1832
BP	GO:0048339	paraxial mesoderm development	11	0.564659	1.76972	0.00763087	0.0458471	0.0345332	2029	tags=73%	list=28%	signal=53%	51176/7481/8463/2296/7474/6939/657/4087
MF	GO:0001222	transcription corepressor binding	27	0.440356	1.8594	0.00765888	0.0459688	0.0346248	1476	tags=44%	list=20%	signal=36%	51176/10783/2099/7704/6772/9572/57649/861/84146/23625/79813/8864
BP	GO:0045927	positive regulation of growth	108	0.302796	1.68436	0.00777483	0.0466175	0.0351135	1022	tags=27%	list=14%	signal=23%	3479/10409/4323/29842/1435/6280/6279/2185/2335/53335/7852/1385/5048/2690/2182/1002/6608/7472/23414/627/23499/9472/4137/6909/1981/23236/7422/4208/7490
BP	GO:0045124	regulation of bone resorption	22	0.46548	1.84843	0.00779766	0.0467071	0.035181	2167	tags=64%	list=29%	signal=45%	7018/6850/54849/4054/3635/8792/1901/81501/57817/9842/101/1436/1445/3690
BP	GO:0007623	circadian rhythm	91	0.303671	1.65549	0.0078381	0.0469019	0.0353277	1559	tags=34%	list=21%	signal=27%	8553/5563/9456/1385/9500/4862/5371/112464/9572/5599/4783/22809/6421/445/9611/4544/1454/2063/3398/134/23239/8792/10062/128674/11245/1958/23596/8864/26258/79723/2691
MF	GO:0005504	fatty acid binding	22	0.464829	1.84585	0.00788196	0.0470693	0.0354537	536	tags=36%	list=7%	signal=34%	2171/2950/6280/6279/1381/2168/84286/55289
BP	GO:0033674	positive regulation of kinase activity	126	0.282007	1.60476	0.00787809	0.0470693	0.0354537	2216	tags=42%	list=30%	signal=30%	50507/3479/1116/5788/10125/142679/1026/54209/2185/100133941/595/28984/5906/2690/51719/5580/6091/4908/8817/7189/3553/9344/56892/7474/23531/894/5899/10006/7520/25778/4921/8792/7057/8543/5770/55704/4504/920/84722/114/5058/5871/284/3491/1436/1894/3690/5294/146850/5292/5629/7098/7124
BP	GO:0001892	embryonic placenta development	52	0.348086	1.7317	0.00791955	0.0471986	0.0355512	2583	tags=58%	list=35%	signal=38%	51176/841/8648/2034/7472/1051/6789/79805/2186/2624/677/1050/6692/1028/653/6615/58495/3976/2885/4435/29072/6768/3491/1437/84870/22846/3880/9021/23462/3726
BP	GO:0071900	regulation of protein serine/threonine kinase activity	115	0.291659	1.63301	0.0079178	0.0471986	0.0355512	1362	tags=30%	list=18%	signal=24%	10125/27250/142679/57761/2950/1026/100133941/595/28984/4067/2690/3301/51719/5795/6091/4908/8817/7189/6547/5997/3553/11221/183/56892/57493/7474/894/5899/64853/8792/348/7057/9555/5770
BP	GO:0060675	ureteric bud morphogenesis	41	0.381563	1.81317	0.00797809	0.0474044	0.0357062	1109	tags=37%	list=15%	signal=31%	9500/7481/2719/6608/30812/8642/650/26585/183/3911/3611/7422/6943/7490/2625
BP	GO:0072171	mesonephric tubule morphogenesis	41	0.381563	1.81317	0.00797809	0.0474044	0.0357062	1109	tags=37%	list=15%	signal=31%	9500/7481/2719/6608/30812/8642/650/26585/183/3911/3611/7422/6943/7490/2625
BP	GO:0140962	multicellular organismal-level chemical homeostasis	43	0.366525	1.76059	0.00796967	0.0474044	0.0357062	1214	tags=35%	list=16%	signal=29%	7018/6441/6648/221395/4756/2778/2034/1512/9476/6556/3162/7422/3694/1080/51297
BP	GO:0055119	relaxation of cardiac muscle	11	0.562177	1.76194	0.00800539	0.0474239	0.0357209	703	tags=45%	list=10%	signal=41%	477/481/2934/8654/5997
BP	GO:0006027	glycosaminoglycan catabolic process	11	0.561854	1.76093	0.00800539	0.0474239	0.0357209	664	tags=45%	list=9%	signal=41%	8993/55576/3425/960/10894
MF	GO:0031994	insulin-like growth factor I binding	11	0.560984	1.7582	0.00800539	0.0474239	0.0357209	1088	tags=55%	list=15%	signal=47%	4036/3489/3488/3486/3487/3485
BP	GO:0001658	branching involved in ureteric bud morphogenesis	35	0.396672	1.81972	0.00807185	0.0477222	0.0359455	1022	tags=37%	list=14%	signal=32%	9500/2719/6608/30812/8642/650/26585/183/3911/3611/7422/6943/7490
BP	GO:1905874	regulation of postsynaptic density organization	12	0.551882	1.77527	0.00807082	0.0477222	0.0359455	1778	tags=67%	list=24%	signal=51%	2185/1000/5789/5802/23613/7779/347730/3556
BP	GO:0010743	regulation of macrophage derived foam cell differentiation	18	0.47501	1.75375	0.00810217	0.0478537	0.0360446	2363	tags=72%	list=32%	signal=49%	1435/185/183/4792/10062/5320/23461/5601/1437/3606/3690/4023/4481
BP	GO:1904659	D-glucose transmembrane transport	62	0.343035	1.7678	0.00811411	0.0478765	0.0360618	1567	tags=35%	list=21%	signal=28%	3479/2171/718/57761/5579/114882/3667/2719/4780/1636/5167/100506658/3553/2887/25999/55600/6041/8682/6506/23596/151176/344901
BP	GO:0002092	positive regulation of receptor internalization	15	0.515658	1.7822	0.00815425	0.0479224	0.0360964	2968	tags=87%	list=40%	signal=52%	187/6850/4908/26585/7422/6401/57817/8862/9779/284/408/351/967
BP	GO:0008217	regulation of blood pressure	95	0.298624	1.63228	0.00814248	0.0479224	0.0360964	2411	tags=48%	list=33%	signal=33%	5743/477/2982/1215/6648/185/5547/490/1278/2028/1636/2022/10631/183/7873/5742/7168/10266/148/143872/3398/11117/134/3043/27131/4883/59/5770/3777/1359/8862/6446/6866/680/2740/6338/1910/8529/23576/51752/5724/7124/5125/3291/5973/83988
BP	GO:0010959	regulation of metal ion transport	202	0.265122	1.57378	0.00815367	0.0479224	0.0360964	1686	tags=31%	list=23%	signal=24%	581/5743/3958/477/7018/187/931/8832/2273/7222/6352/481/9456/6347/482/11151/54209/3627/2185/7852/81671/5270/4067/490/3790/2534/1272/51719/5371/6000/91404/128414/1636/55800/9472/5664/784/183/7351/79026/1729/2316/776/783/23704/7779/4638/134/5999/51297/1535/7871/2859/596/8514/53827/1193/920/567/57817/2257/930
BP	GO:0140352	export from cell	432	0.226044	1.40305	0.00814552	0.0479224	0.0360964	2217	tags=37%	list=30%	signal=28%	5880/5743/3479/477/7447/5341/6850/10125/8832/90139/27063/6352/6281/481/5579/3684/482/2213/56729/1731/57126/11151/54209/4756/6664/185/5798/1131/28984/2778/5906/1385/5270/4067/490/1374/5048/821/3996/2182/9885/8609/3667/301/4628/2022/4282/7127/4053/92745/9572/5321/3557/650/8773/115827/6616/10461/3553/3055/7052/183/7351/4627/2308/4544/23236/6558/9601/8775/55737/6659/5899/7043/2624/23704/4208/558/1080…
BP	GO:0014002	astrocyte development	25	0.439546	1.82286	0.00821046	0.048154	0.0362708	982	tags=40%	list=13%	signal=35%	7431/6280/712/6279/54209/6608/4137/9572/3553/3459
BP	GO:0030902	hindbrain development	79	0.319814	1.705	0.00821772	0.048154	0.0362708	2743	tags=57%	list=37%	signal=36%	51176/3309/482/2213/5270/1902/8648/473/1272/54910/4192/6608/1386/146057/2296/22809/2316/2624/5802/5362/471/2879/653/596/9935/916/4760/4086/4983/22891/2047/8322/9241/5629/6532/8854/9378/1600/3211/5457/27089/3199/25861/7846/3688
BP	GO:0034341	response to type II interferon	76	0.321293	1.70271	0.00822617	0.048154	0.0362708	1184	tags=30%	list=16%	signal=26%	2597/338382/6352/7431/6347/71/8519/10435/2934/6772/6672/3055/4360/6556/140885/445/961/7474/2058/3459/10581/11093/10062
CC	GO:0044853	plasma membrane raft	69	0.322409	1.68465	0.00822617	0.048154	0.0362708	2350	tags=49%	list=32%	signal=34%	5743/477/931/8631/147/3684/57126/54209/1000/7035/3667/6608/5740/112464/9472/3055/148/4038/6401/925/5657/4118/114/79054/657/4040/3037/3689/3778/949/7430/83483/1139/6531
BP	GO:0045582	positive regulation of T cell differentiation	66	0.331041	1.72087	0.00823463	0.0481559	0.0362723	1669	tags=38%	list=23%	signal=30%	5788/51176/6850/10125/11006/7704/4192/301/11221/9580/861/6659/6605/8808/2625/3707/3142/5896/6666/100/3071/60/939/3593/942
BP	GO:0010755	regulation of plasminogen activation	13	0.538999	1.78425	0.00826554	0.048289	0.0363725	3041	tags=92%	list=41%	signal=54%	6281/5270/5329/861/7057/5327/5054/5328/302/7123/1522/55848
BP	GO:0045616	regulation of keratinocyte differentiation	18	0.472926	1.74606	0.00827548	0.0482995	0.0363804	1750	tags=56%	list=24%	signal=42%	135228/7538/2296/29841/55506/677/9555/58495/81537/130120
BP	GO:0072574	hepatocyte proliferation	13	0.538584	1.78287	0.00835789	0.0486845	0.0366704	2216	tags=77%	list=30%	signal=54%	55959/8837/4192/1051/57142/634/4853/5629/5764/7124
BP	GO:0072575	epithelial cell proliferation involved in liver morphogenesis	13	0.538584	1.78287	0.00835789	0.0486845	0.0366704	2216	tags=77%	list=30%	signal=54%	55959/8837/4192/1051/57142/634/4853/5629/5764/7124
BP	GO:0034103	regulation of tissue remodeling	42	0.387776	1.84936	0.00848787	0.0493931	0.0372041	2167	tags=55%	list=29%	signal=39%	7018/6850/10457/54849/4192/26585/861/4054/3635/4921/8792/1901/81501/57817/3593/9842/101/634/1436/1445/3600/3606/3690
BP	GO:0019722	calcium-mediated signaling	115	0.29043	1.62613	0.00852104	0.0495374	0.0373128	2477	tags=48%	list=34%	signal=32%	3579/3479/477/5788/5341/6850/481/719/54209/643/185/7852/1131/5795/2358/2274/5156/9472/4137/6364/201191/57007/1827/29995/3357/6263/57644/64581/100/6401/1193/916/920/10663/10231/79054/51196/5350/5024/10523/1910/729230/1234/7124/3973/55273/1230/6348/5159/683/83988/2890/2892/51554/3094
BP	GO:0045063	T-helper 1 cell differentiation	14	0.518439	1.76796	0.00856785	0.0497607	0.037481	2556	tags=79%	list=35%	signal=51%	51176/6775/301/3142/8809/6693/30009/3566/64218/941/64332
BP	GO:0022411	cellular component disassembly	209	0.257827	1.53425	0.00859389	0.0498631	0.0375581	1561	tags=28%	list=21%	signal=23%	5880/581/718/4323/4318/5341/4313/9448/10783/11096/3312/713/4321/1215/5563/5579/3684/712/4317/54209/10297/10595/81671/5048/9470/64320/2934/6591/146057/3936/2022/6457/120/3553/1803/2935/3925/1515/6709/5962/8775/57026/6605/7043/285590/4921/22985/138428/128866/7429/11034/10763/4134/26058/9525/2801/2191/4314
BP	GO:0031400	negative regulation of protein modification process	177	0.260682	1.53552	0.00861109	0.049914	0.0375965	1476	tags=28%	list=20%	signal=23%	5788/27250/142679/57761/11122/56271/5563/2950/1026/11006/9353/4067/2534/10363/3303/3301/5795/6608/5580/7498/2192/4908/6547/2729/4137/116496/5167/100506658/5997/3553/64943/11221/183/3486/57493/1981/10362/6659/80243/3300/64853/26146/348/57580/9555/1028/5770/1622/58533/8864
BP	GO:0050855	regulation of B cell receptor signaling pathway	12	0.548654	1.76488	0.00862425	0.0499414	0.0376171	2195	tags=75%	list=30%	signal=53%	123920/2213/9214/4067/975/26228/930/23228/5777
BP	GO:2000279	negative regulation of DNA biosynthetic process	13	0.536617	1.77636	0.00863495	0.0499545	0.037627	1302	tags=54%	list=18%	signal=44%	27063/1026/5371/1602/3178/3776/55226
BP	GO:0009154	purine ribonucleotide catabolic process	65	0.335122	1.73915	0.00868744	0.0502091	0.0378188	1069	tags=28%	list=14%	signal=24%	3479/2597/3939/6774/26137/9759/5230/5563/5315/7498/8654/7351/226/9611/26471/5223/3251/8671
MF	GO:0016709	oxidoreductase activity acting on paired donors with incorporation or reduction of molecular oxygen NAD(P)H as one donor and incorporation of one atom of oxygen	15	0.513898	1.77612	0.0087009	0.050238	0.0378405	490	tags=33%	list=7%	signal=31%	2328/1571/2327/56603/2326
BP	GO:0032233	positive regulation of actin filament bundle assembly	36	0.398582	1.83369	0.00873919	0.0504099	0.03797	2242	tags=56%	list=30%	signal=39%	1490/5341/6281/8477/28984/1902/51466/7168/2316/961/7043/7429/6385/55704/5058/5829/5216/9788/6376/22899
BP	GO:0043086	negative regulation of catalytic activity	162	0.270572	1.58313	0.00876084	0.0504856	0.0380271	1594	tags=30%	list=22%	signal=24%	2597/5788/27250/142679/57761/11122/7076/2950/1026/11006/7448/3001/93974/5270/4067/5273/3301/5795/2717/6547/1893/7538/1476/5997/3553/64943/11221/183/871/57493/7078/3240/5962/5269/80243/10565/64853/26086/348/57580/9555/10763/1028/5770/58533/22925/4504/26998/22914
BP	GO:0010718	positive regulation of epithelial to mesenchymal transition	45	0.376388	1.82145	0.00877724	0.050531	0.0380612	1523	tags=40%	list=21%	signal=32%	51176/28984/283149/1277/4192/116844/4017/2022/650/2296/3553/183/25805/7043/80139/152007/6615/90
BP	GO:0051928	positive regulation of calcium ion transport	57	0.341837	1.72934	0.00880508	0.050642	0.0381448	1072	tags=28%	list=15%	signal=24%	581/3958/187/931/7222/6352/9456/6347/3627/81671/490/9472/784/776/783/4638
BP	GO:1990776	response to angiotensin	22	0.460747	1.82964	0.0088952	0.0506616	0.0381596	1362	tags=45%	list=18%	signal=37%	5743/1281/185/760/4780/5580/1636/183/4921/5770
MF	GO:0097493	structural molecule activity conferring elasticity	10	0.588108	1.7967	0.0088843	0.0506616	0.0381596	1182	tags=60%	list=16%	signal=50%	10516/2006/79026/2201/11117/7273
BP	GO:0070542	response to fatty acid	31	0.406866	1.79116	0.00891111	0.0506616	0.0381596	1225	tags=39%	list=17%	signal=32%	5743/3158/1374/3667/5580/7351/445/2308/847/23236/7520/3776
BP	GO:0002715	regulation of natural killer cell mediated immunity	31	0.406758	1.79068	0.00891111	0.0506616	0.0381596	2187	tags=58%	list=30%	signal=41%	8807/10125/3821/10225/387837/84868/3635/22914/116449/3824/3823/4068/3593/135250/2885/441168/634/146850
BP	GO:1901739	regulation of myoblast fusion	12	0.548143	1.76324	0.00890096	0.0506616	0.0381596	542	tags=42%	list=7%	signal=39%	963/9518/3627/8837/51177
BP	GO:0030038	contractile actin filament bundle assembly	61	0.340961	1.7522	0.00890526	0.0506616	0.0381596	1475	tags=36%	list=20%	signal=29%	1490/6281/71/2185/8477/28984/1902/84952/221061/2006/51466/116985/7168/3925/961/7043/6385/1901/10398/90102/55704/8452
BP	GO:0043149	stress fiber assembly	61	0.340961	1.7522	0.00890526	0.0506616	0.0381596	1475	tags=36%	list=20%	signal=29%	1490/6281/71/2185/8477/28984/1902/84952/221061/2006/51466/116985/7168/3925/961/7043/6385/1901/10398/90102/55704/8452
BP	GO:0002720	positive regulation of cytokine production involved in immune response	52	0.346569	1.72415	0.00886046	0.0506616	0.0381596	1647	tags=40%	list=22%	signal=32%	6850/924/7189/4282/10417/975/9261/1604/3553/7474/3554/64170/2625/8809/64581/57142/10865/116449/30009/567/3815
BP	GO:0060759	regulation of response to cytokine stimulus	104	0.297993	1.64459	0.00884049	0.0506616	0.0381596	1362	tags=29%	list=18%	signal=24%	7850/83643/5788/6850/841/6352/4321/2950/1435/4317/54209/9353/100133941/7852/5048/9470/3303/6091/10010/1893/9261/3557/1660/7474/3554/558/9641/10062/25939/5770
BP	GO:0031348	negative regulation of defense response	152	0.280407	1.63083	0.0089106	0.0506616	0.0381596	1776	tags=34%	list=24%	signal=27%	3479/5788/8993/6850/6774/55646/4321/2950/2213/5169/54209/3821/10225/2778/4067/2534/9470/11005/284340/387837/84868/4192/2876/2358/5580/5740/7538/9572/3055/11221/140885/55737/10769/3635/134/2625/80762/10062/26146/348/25939/26058/23005/100/6693/3824/57817/3593/7010/55872/6288/2885
BP	GO:0061458	reproductive system development	152	0.279129	1.6234	0.0089106	0.0506616	0.0381596	1030	tags=25%	list=14%	signal=22%	581/10409/718/4323/4313/23213/2099/56729/1396/9353/5798/2295/3148/5270/4036/8648/3371/23414/30812/4254/1636/1051/5156/2288/2296/10461/22836/2316/5660/7422/7474/51742/6943/26471/9510/558/7490/3552
BP	GO:0043270	positive regulation of monoatomic ion transport	102	0.291849	1.60386	0.00884943	0.0506616	0.0381596	1102	tags=25%	list=15%	signal=22%	581/3958/187/931/2273/7222/6352/481/9456/6347/482/54209/3627/81671/490/1272/6000/55800/9472/784/2316/776/783/1080/4638/134
BP	GO:0030502	negative regulation of bone mineralization	16	0.513827	1.82847	0.00892335	0.0506826	0.0381754	2357	tags=75%	list=32%	signal=51%	2185/1893/359845/5167/26585/4054/5552/197/54880/8074/1230/6348
BP	GO:0007204	positive regulation of cytosolic calcium ion concentration	85	0.307828	1.6617	0.00893982	0.0507275	0.0382092	2678	tags=54%	list=36%	signal=35%	3579/581/147/2099/7222/719/2357/2185/643/185/100133941/7852/27202/1902/5371/2358/1604/57007/784/2624/148/2859/596/10663/114/6288/5024/4040/4988/2740/1910/5737/728/729230/1234/5294/60675/7225/3973/1230/9170/51554/624/9034/114897/79608
BP	GO:1904996	positive regulation of leukocyte adhesion to vascular endothelial cell	18	0.47116	1.73954	0.00896956	0.0507897	0.038256	2479	tags=72%	list=34%	signal=48%	10164/4192/7189/9435/3676/6403/6401/729230/3689/5724/7124/2113/2650
BP	GO:0035710	CD4-positive alpha-beta T cell activation	68	0.319127	1.66687	0.0089765	0.0507897	0.038256	1669	tags=37%	list=23%	signal=29%	51176/6774/29851/969/6775/3956/301/1051/5588/975/1604/940/861/2625/80762/3142/8995/8809/916/4818/3071/6693/30009/3593/942
BP	GO:0046634	regulation of alpha-beta T cell activation	68	0.318394	1.66304	0.0089765	0.0507897	0.038256	1669	tags=37%	list=23%	signal=29%	3958/5788/6850/11006/969/7704/3956/301/5588/975/1604/940/861/2625/3707/80762/3142/8995/100/916/3071/30009/10148/3593/942
BP	GO:0000963	mitochondrial RNA processing	11	-0.494268	-2.03251	0.00903524	0.0510642	0.0384628	2369	tags=82%	list=32%	signal=56%	80324/9238/22868/9692/90806/79675/79828/60493/51654
CC	GO:0005635	nuclear envelope	227	0.247762	1.48693	0.00904225	0.0510642	0.0384628	1883	tags=33%	list=26%	signal=25%	5880/581/5743/28959/2597/1674/123920/1063/147/114880/51131/166336/595/5048/5108/10204/821/114882/5371/25909/6000/57144/9472/285671/5321/5664/3482/54498/7112/7356/811/23236/55749/4000/894/148/25777/665/4001/4646/7779/3300/64222/3756/241/127845/26012/4259/3930/2733/598/128866/23588/2879/57142/100131211/27067/9525/596/1844/9635/64782/9805/4258/23225/259/23291/311/4086/56894/5905/11044/11269/5058/260…
BP	GO:0030856	regulation of epithelial cell differentiation	86	0.301162	1.62691	0.00908336	0.0512474	0.0386008	1678	tags=35%	list=23%	signal=27%	4318/51176/55810/135228/100133941/595/8609/694/6608/7498/7538/1051/6772/650/2296/3553/29841/23236/7422/55506/677/3552/2625/9555/1028/2487/58495/81537/5054/3976
BP	GO:0050679	positive regulation of epithelial cell proliferation	113	0.295154	1.64939	0.00912429	0.0514294	0.0387379	2220	tags=44%	list=30%	signal=31%	3479/187/6774/6352/4321/8828/6664/185/5798/595/3148/8837/4192/116844/6608/7472/1893/79805/55109/5314/3162/3676/7422/7474/4830/2624/80139/3357/3142/51162/283131/56005/57142/653/441478/7010/8862/130120/657/9037/728/2896/3037/3690/9241/4853/5629/5764/7124/7291
BP	GO:2001242	regulation of intrinsic apoptotic signaling pathway	107	0.295148	1.63689	0.00914272	0.0514843	0.0387793	1767	tags=36%	list=24%	signal=27%	581/5743/4318/4313/6648/6280/6279/2213/54209/2534/3303/3301/4780/2876/960/5329/1191/6591/4282/57007/6421/7178/26471/10018/8440/598/5770/90993/6498/596/6615/8575/5326/3932/1649/4193/6201/259230
BP	GO:0098771	inorganic ion homeostasis	254	0.245974	1.48433	0.00919171	0.051711	0.03895	2757	tags=48%	list=37%	signal=31%	581/477/7018/187/5788/309/7222/6352/481/6648/5579/6354/482/11151/5169/3627/2185/79689/4756/185/523/4067/490/249/9885/5371/2034/5745/10568/6557/6547/2495/6332/9472/5167/5664/7052/5314/183/6556/3162/7178/1729/2316/811/23236/7474/6558/783/10539/3552/7779/134/26504/3357/80762/5330/348/6263/57644/130733/1535/26505/151176/596/57419/4502/4504/1193/3932/6005/567/57817/114/930/1649/8031/79054/28952/51196/…
BP	GO:0019646	aerobic electron transport chain	55	0.350445	1.7669	0.00925331	0.0520082	0.0391739	3502	tags=78%	list=47%	signal=41%	1337/4710/1340/440567/84701/1349/54205/1537/4705/4713/27089/4696/4698/4702/1329/11315/4700/1350/4714/4697/1347/1327/1345/1351/10975/9377/4695/4694/4718/4715/4711/1339/29103/4716/4708/4717/4712/4726/4706/4709/4731/4729/4728
BP	GO:0071346	cellular response to type II interferon	64	0.339556	1.7605	0.00929291	0.0521812	0.0393042	2254	tags=50%	list=31%	signal=35%	2597/338382/6352/7431/6347/71/10435/2934/6772/6672/3055/4360/140885/445/961/7474/2058/3459/11093/10062/7454/7294/3593/3394/199/383/834/5292/7097/7098/7124/2317
BP	GO:0010212	response to ionizing radiation	72	0.327513	1.72093	0.00932162	0.0522929	0.0393883	2216	tags=47%	list=30%	signal=33%	581/5788/6648/1026/6354/3627/339/5371/2876/1410/6591/10010/3694/7056/894/7412/10276/3552/2625/7520/55766/598/1958/596/64782/4193/2885/2140/63979/1894/1647/3014/3428/7124
BP	GO:0002833	positive regulation of response to biotic stimulus	218	0.250582	1.49725	0.0093505	0.0524053	0.039473	2216	tags=40%	list=30%	signal=29%	6850/8807/10125/338382/10621/3312/2099/6352/4321/6280/6279/285852/929/54209/92747/3821/4332/3148/4067/1374/2534/3303/84868/57590/5063/2358/7189/4282/7305/9572/9261/92610/5599/3055/3320/3329/6421/9865/81622/1660/839/7474/81926/5802/11117/7105/9641/64170/7520/4792/10062/1535/64581/57142/3929/6688/22914/116449/3824/7294/3823/4068/3593/135250/912/130120/57162/7187/10318/51114/5058/26057/90864/9390/84…
BP	GO:0032305	positive regulation of icosanoid secretion	12	0.54478	1.75242	0.00936214	0.0524209	0.0394848	1420	tags=58%	list=19%	signal=47%	4282/5321/3553/3552/6754/8792/22925
BP	GO:0048844	artery morphogenesis	45	0.374358	1.81163	0.00940982	0.0526381	0.0396483	1398	tags=38%	list=19%	signal=31%	3248/1281/221395/4036/7481/4192/30008/2022/2296/6909/60681/7422/6659/4638/5396/348/57142
BP	GO:0032271	regulation of protein polymerization	115	0.289374	1.62021	0.00942591	0.0526784	0.0396787	2310	tags=46%	list=31%	signal=32%	11151/246/2185/9353/26999/8874/3303/81553/10435/4133/5063/2934/5580/2006/51466/4137/120/2288/100506658/3055/3320/10109/3925/6709/5962/25999/7408/10565/8440/57580/7429/22919/157922/10787/55142/221074/3071/84722/2885/23191/9873/163782/51571/5058/256949/11078/3304/50853/2242/4690/5216/1003/29766
BP	GO:0021675	nerve development	51	0.344141	1.70587	0.00949768	0.0529796	0.0399055	2459	tags=55%	list=33%	signal=37%	23213/84189/8828/55959/5270/1902/9215/4908/627/57007/3676/3611/7412/6326/9935/6323/4884/6299/104/55636/2047/4693/5361/6405/6152/3200/3211/5457
CC	GO:1990351	transporter complex	226	0.252632	1.51677	0.00949062	0.0529796	0.0399055	3317	tags=61%	list=45%	signal=35%	477/140738/84419/51606/1337/7222/3762/481/6280/482/4710/79895/2185/1340/440567/523/3790/1678/84701/56479/91404/55800/6332/80727/9472/6616/784/1349/776/783/23704/506/1080/1537/55248/3756/4705/3776/285175/20/3745/26515/6263/6328/51079/9296/4713/8514/6326/6323/1193/9629/57406/79714/3744/3763/80333/5350/6330/440699/514/3742/6338/1536/3759/3778/7225/23250/126129/1139/125965/55107/6324/9132/2890/2892/8…
BP	GO:1990845	adaptive thermogenesis	91	0.301508	1.6437	0.00951221	0.0530107	0.039929	1538	tags=32%	list=21%	signal=26%	3934/2171/6850/51316/11096/4237/7852/2778/249/2034/2104/1051/9572/26580/50486/7351/7067/7422/2887/216/10062/33/7090/2271/4883/8809/79813/8864/2628
MF	GO:0005158	insulin receptor binding	13	0.530853	1.75728	0.00955937	0.0532234	0.0400892	1394	tags=54%	list=19%	signal=44%	3479/3667/5167/2887/55788/5770/55704
BP	GO:0097242	amyloid-beta clearance	27	0.43409	1.83295	0.00956894	0.0532267	0.0400917	1274	tags=41%	list=17%	signal=34%	718/6850/3684/54209/4036/1191/7305/8685/3459/4038/348
BP	GO:0032835	glomerulus development	49	0.361648	1.77957	0.00964455	0.0535969	0.0403705	2587	tags=59%	list=35%	signal=39%	10409/23213/100133941/55959/8837/1286/2028/5156/2296/6943/4208/7490/59/1958/947/596/7010/51196/284/1910/3570/3690/9241/4853/9788/358/5159/26508/8710
BP	GO:0061844	antimicrobial humoral immune response mediated by antimicrobial peptide	48	0.362298	1.77428	0.00965467	0.0536029	0.040375	1750	tags=42%	list=24%	signal=32%	3958/2597/8993/6352/6347/6280/6354/414062/3627/2920/11005/6364/9547/51297/6361/6367/567/57817/6372/130120
BP	GO:0010977	negative regulation of neuron projection development	61	0.33879	1.74104	0.00967961	0.053691	0.0404414	2447	tags=54%	list=33%	signal=36%	7431/9353/4756/53335/5048/120114/80031/1902/4133/157285/2288/2316/7474/5802/4038/26052/348/5770/57142/349667/4504/567/10500/4193/7025/9037/25987/22891/6405/7070/56920/1600/9423
BP	GO:0042596	fear response	24	0.447469	1.83978	0.00970298	0.0537703	0.0405011	1478	tags=46%	list=20%	signal=37%	477/9215/4862/4192/1803/1981/4208/348/7419/5896/596
CC	GO:0035579	specific granule membrane	56	0.340899	1.72286	0.00972997	0.0538192	0.040538	2284	tags=50%	list=31%	signal=35%	963/81619/719/3684/338339/57126/79895/5906/5795/2358/5329/966/5787/8773/6616/961/2040/1535/8514/932/5328/5337/1536/101/634/3689/23250/3683
BP	GO:0030216	keratinocyte differentiation	56	0.340808	1.7224	0.00972997	0.0538192	0.040538	2576	tags=57%	list=35%	signal=37%	135228/1026/56603/301/7538/6789/2296/10628/29841/7474/55506/677/3552/3664/9555/23596/58495/9935/81537/130120/204219/51384/6768/29986/2317/1832/1475/1969/1001/4831/64332/2355
BP	GO:1903318	negative regulation of protein maturation	13	0.528307	1.74885	0.00974498	0.0538519	0.0405626	1711	tags=62%	list=23%	signal=47%	7850/5270/2619/7057/5327/5054/4193/5328
BP	GO:0034329	cell junction assembly	259	0.245434	1.48173	0.00978953	0.0539974	0.0406722	2459	tags=44%	list=33%	signal=30%	4139/187/4323/4897/9448/84189/6281/2706/79953/71/2185/2335/26999/81671/5906/1009/1000/2239/8874/51201/9215/1002/54910/7481/5795/6591/10052/627/23499/1636/4137/100506658/6616/26585/3553/183/28316/9344/1981/10266/7422/7474/9040/5789/55737/4208/5802/80139/5362/7145/10611/4867/4038/84628/26052/7057/64405/6385/84612/5770/8128/90102/57142/27067/92737/596/6615/347730/60/7010/4884/4915/147381/3556/1004/4…
BP	GO:0051129	negative regulation of cellular component organization	352	0.228641	1.40691	0.00978953	0.0539974	0.0406722	1710	tags=29%	list=23%	signal=24%	3958/3479/4323/9535/1063/57405/3312/9023/7431/3309/2213/11151/54209/3627/9353/4756/10297/53335/5048/120114/2534/80031/8874/1902/84952/3303/146691/8837/4133/5371/2876/2934/1410/5580/1191/146057/699/1636/157285/51466/2729/4137/6457/120/2288/116985/3553/1803/140885/3925/2316/7067/961/7422/6709/7474/5962/55737/4000/81926/26471/8467/5802/25999/84168/11117/3178/3300/7756/7520/10565/64853/10062/4038/20/…
BP	GO:0051347	positive regulation of transferase activity	148	0.277667	1.60876	0.00980913	0.0540551	0.0407157	1394	tags=28%	list=19%	signal=23%	50507/3479/1116/5788/10125/142679/57761/1026/54209/2185/185/100133941/595/28984/5906/2690/51719/5580/6091/4908/8817/7189/3553/183/9344/56892/7474/23531/894/5899/10006/7520/25778/4921/8792/348/7057/8543/5770/6500/1622/55704
BP	GO:0033500	carbohydrate homeostasis	119	0.289565	1.63055	0.0098684	0.0542808	0.0408856	1240	tags=27%	list=17%	signal=23%	50507/2171/7447/6774/26137/57048/1215/5563/54209/221395/5798/5547/8609/3667/1277/5795/2876/3488/1636/2729/9572/8840/7351/2308/4544/6659/1080/1050/2201/7391/3170/3745
BP	GO:0042593	glucose homeostasis	119	0.289565	1.63055	0.0098684	0.0542808	0.0408856	1240	tags=27%	list=17%	signal=23%	50507/2171/7447/6774/26137/57048/1215/5563/54209/221395/5798/5547/8609/3667/1277/5795/2876/3488/1636/2729/9572/8840/7351/2308/4544/6659/1080/1050/2201/7391/3170/3745
BP	GO:0046683	response to organophosphorus	73	0.318393	1.67809	0.0099073	0.0544442	0.0410087	1022	tags=29%	list=14%	signal=25%	5743/7222/2185/3158/5906/1902/2354/1277/3488/9472/6772/5167/3553/445/7056/2353/57026/1036/677/1080/7490
BP	GO:0034144	negative regulation of toll-like receptor 4 signaling pathway	12	0.542961	1.74657	0.00991829	0.0544541	0.0410162	644	tags=42%	list=9%	signal=38%	338382/54209/92747/4067/9572
BP	GO:0060322	head development	391	0.228221	1.41282	0.00993898	0.0545172	0.0410637	1770	tags=30%	list=24%	signal=24%	3579/581/477/3939/10409/4323/51176/4897/4313/1063/26468/1215/6271/3309/1281/3684/482/8828/2213/9353/2176/6664/7852/1340/1385/5270/4036/5048/1000/5108/6310/2534/80031/1902/8648/473/1272/55553/9215/54910/1277/4192/51377/6608/23114/7472/6091/1386/1282/146057/7305/5156/650/2296/4929/22884/8655/22809/2316/2186/23236/7474/285025/8775/2353/6659/7043/2624/25777/51199/55506/558/5802/3398/3251/80853/5362/7…
BP	GO:0034765	regulation of monoatomic ion transmembrane transport	172	0.265817	1.56165	0.00996886	0.0546305	0.041149	2240	tags=41%	list=30%	signal=29%	581/477/187/4318/931/2273/7222/3762/481/9456/6347/482/11151/54209/3627/2185/81671/4067/3790/2534/51719/5371/6000/91404/9472/5664/784/183/7351/79026/1729/2316/776/783/23704/1080/7779/2040/5999/51297/1535/7871/2859/596/8514/53827/1193/57817/2257/930/8737/3763/80333/57120/5350/5024/6330/440699/9465/729230/55636/1520/2539/3690/3759/5294/5777/7070/7225/3973/6376
BP	GO:0001938	positive regulation of endothelial cell proliferation	55	0.347633	1.75273	0.0100309	0.0549196	0.0413668	1714	tags=40%	list=23%	signal=31%	187/6774/8828/185/3148/4192/116844/7472/1893/79805/55109/3162/3676/7422/7474/2624/3357/51162/56005/441478/7010/8862
BP	GO:1904707	positive regulation of vascular associated smooth muscle cell proliferation	31	0.404514	1.7808	0.0100556	0.0550042	0.0414305	1156	tags=32%	list=16%	signal=27%	3248/3479/4318/4313/55810/4209/3488/10203/9510/4921
BP	GO:0009792	embryo development ending in birth or egg hatching	331	0.235881	1.44511	0.0100884	0.0551328	0.0415274	1556	tags=27%	list=21%	signal=23%	3479/4323/51176/10365/841/23213/123920/343263/1281/1026/55224/729/221395/6664/55959/3202/4036/5954/8648/2182/54910/7481/1277/2034/6608/7472/8463/5745/23414/1386/7189/23168/30812/10568/3215/64321/1636/1051/6789/5156/9644/8642/79805/650/2296/4627/6909/57493/1627/60681/56977/2186/7422/7474/85407/4522/7043/2624/285855/677/1050/3214/5362/7779/4245/10006/2625/7408/5396/6692/10018/1999/338596/6939/598/6…
BP	GO:0097191	extrinsic apoptotic signaling pathway	138	0.275348	1.58312	0.0101289	0.0553029	0.0416556	2293	tags=43%	list=31%	signal=31%	581/3958/3479/5788/841/2950/3148/3303/51330/8837/5371/2876/6591/8406/57144/4254/6789/2729/6672/3553/183/3162/467/50486/2139/4000/3552/10018/8682/598/7057/9191/51079/219699/653/6498/6688/596/90/81537/939/5054/4118/3624/8737/2140/79370/117584/7001/3304/8743/1437/90865/3570/7098/7124/7132/6376/3875/8742
CC	GO:0071682	endocytic vesicle lumen	15	0.507766	1.75492	0.0101631	0.0553367	0.041681	3032	tags=87%	list=41%	signal=51%	8993/3039/3320/811/3240/3043/348/6288/6678/10525/10808/7184/3263
BP	GO:0048143	astrocyte activation	15	0.507613	1.7544	0.0101631	0.0553367	0.041681	982	tags=47%	list=13%	signal=41%	712/54209/6608/4137/9572/3553/3459
BP	GO:0030449	regulation of complement activation	15	0.507398	1.75365	0.0101631	0.0553367	0.041681	713	tags=40%	list=10%	signal=36%	718/54209/3075/966/1604/3553
BP	GO:0043502	regulation of muscle adaptation	46	0.36037	1.75249	0.010179	0.0553724	0.0417079	1177	tags=33%	list=16%	signal=28%	3479/9759/7222/221476/3488/9472/8654/5997/183/2308/4000/10539/148/29995/5999
BP	GO:0032872	regulation of stress-activated MAPK cascade	22	0.455126	1.80732	0.0102506	0.0557107	0.0419627	1092	tags=41%	list=15%	signal=35%	5052/2950/54910/3489/11221/9344/2308/3552/64170
BP	GO:0045055	regulated exocytosis	95	0.294599	1.61028	0.0102732	0.0557821	0.0420165	2264	tags=44%	list=31%	signal=31%	5880/5341/6850/10125/8832/90139/5579/3684/2213/57126/11151/5906/4067/9885/8773/6616/3055/4627/8775/2624/3745/6688/26258/57617/4818/3071/116449/3815/22895/6857/5873/9501/729230/634/2242/2268/3566/3689/5294/5724/6813/306
BP	GO:0010613	positive regulation of cardiac muscle hypertrophy	14	0.511349	1.74378	0.0102958	0.0558353	0.0420566	965	tags=43%	list=13%	signal=37%	3479/7222/9472/8654/183/148
BP	GO:0045780	positive regulation of bone resorption	13	0.525041	1.73804	0.0103018	0.0558353	0.0420566	2167	tags=69%	list=29%	signal=49%	7018/6850/54849/4054/8792/81501/9842/101/3690
BP	GO:0045954	positive regulation of natural killer cell mediated cytotoxicity	15	0.50667	1.75114	0.0103462	0.0560248	0.0421993	1671	tags=60%	list=23%	signal=46%	8807/10125/3821/22914/3824/3823/4068/3593/135250
BP	GO:0055074	calcium ion homeostasis	157	0.265691	1.55046	0.0104081	0.0563085	0.042413	2379	tags=44%	list=32%	signal=30%	581/477/187/5788/309/7222/6352/481/5579/6354/11151/3627/2185/4067/490/249/9885/5371/5745/6547/9472/5664/7052/5314/7178/1729/2316/811/23236/7474/783/7779/134/3357/5330/348/6263/57644/130733/1535/596/57419/1193/3932/114/930/1649/79054/51196/5350/23228/10523/8074/729230/1234/55636/3690/5777/7070/7225/6357/3973/6376/1003/79572/1139/1230/6348/29887
BP	GO:0006986	response to unfolded protein	78	0.31402	1.67228	0.0105109	0.0567971	0.042781	1425	tags=32%	list=19%	signal=26%	581/84236/3312/3309/3326/10595/595/11080/3303/3301/4780/7873/3320/871/467/3329/27248/3300/10133/10018/8440/7057/5770/90993/51528
BP	GO:0090288	negative regulation of cellular response to growth factor stimulus	69	0.317936	1.66128	0.0105325	0.0567971	0.042781	1526	tags=35%	list=21%	signal=28%	23213/9353/55959/4036/8837/1634/7498/100532736/57556/2817/387914/26585/183/25805/7474/5654/11117/2625/7057/5770/90993/64388/6498/151556
MF	GO:0045296	cadherin binding	208	0.256575	1.52623	0.0105368	0.0567971	0.042781	3155	tags=57%	list=43%	signal=34%	5052/3939/11122/3312/3309/3326/10562/8496/6138/4756/1656/1009/1000/3303/1002/5315/5795/301/5787/23499/6164/6772/8642/7112/28316/4627/7458/51100/79026/226/2316/1627/6709/5962/1266/4072/29789/10801/10006/9208/7408/10611/471/3898/27131/79180/10528/128866/64405/800/5770/22919/90102/57142/4735/10190/114793/26058/2801/90/53827/1004/5905/10298/421/22905/2194/4690/23647/5216/2317/3875/7430/1003/29766/615…
MF	GO:0019904	protein domain specific binding	333	0.230044	1.40996	0.0105368	0.0567971	0.042781	3321	tags=57%	list=45%	signal=33%	581/2597/10409/51176/6850/8553/841/57048/8631/2181/399694/3312/7431/3309/3326/3148/4067/1656/4036/7704/6996/55970/2534/2690/1902/9209/3303/3301/3667/5063/4780/2876/5329/8463/2104/6091/1386/51466/4137/6672/100506658/6616/3553/79056/3320/140885/6383/4627/7067/7474/85407/2624/55824/1080/285590/7490/23613/8728/3178/3635/64170/10006/2625/7408/5396/80762/64853/10811/10314/3170/3930/598/56937/1535/8683/…
BP	GO:0071326	cellular response to monosaccharide stimulus	65	0.331743	1.72161	0.0106863	0.0575504	0.0433484	1240	tags=31%	list=17%	signal=26%	50507/7447/26137/1215/5563/54209/5798/8609/1277/2876/1636/2729/9572/7351/23236/6659/1080/7391/3170/3745
BP	GO:0097028	dendritic cell differentiation	24	0.443498	1.82346	0.0106981	0.057562	0.0433571	1673	tags=50%	list=23%	signal=39%	28959/2213/54209/55509/4067/7189/1051/3694/558/81501/5657/3394
BP	GO:0048661	positive regulation of smooth muscle cell proliferation	58	0.343506	1.7409	0.0108423	0.0582846	0.0439014	1342	tags=31%	list=18%	signal=26%	5743/3248/3479/4318/4313/55810/6352/4209/3488/6772/8840/3162/10203/9510/3398/4921/7057/1901
BP	GO:0052547	regulation of peptidase activity	49	0.357301	1.75819	0.0108991	0.0585369	0.0440915	979	tags=31%	list=13%	signal=27%	2597/6774/7076/7448/5270/4067/5273/10010/1893/1512/1476/871/5684/7078/5269
BP	GO:2000351	regulation of endothelial cell apoptotic process	35	0.388626	1.78281	0.0109489	0.0587509	0.0442527	2441	tags=60%	list=33%	signal=40%	27250/6347/28984/4780/57124/3676/10266/2624/2625/7057/641700/5770/5054/7010/10298/9037/284/3690/7124/1003/3383
BP	GO:0030218	erythrocyte differentiation	82	0.310621	1.66364	0.0109825	0.0588781	0.0443485	1663	tags=35%	list=23%	signal=28%	5880/10365/6774/55646/221395/93974/3148/3202/4067/3303/2034/7538/6772/7067/7422/2624/677/3398/3635/2625/22985/51621/6688/9935/3071/6005/567/3815/3624
BP	GO:0006195	purine nucleotide catabolic process	67	0.32025	1.66991	0.0109938	0.0588853	0.0443539	1069	tags=27%	list=14%	signal=23%	3479/2597/3939/6774/26137/9759/5230/5563/5315/7498/8654/7351/226/9611/26471/5223/3251/8671
BP	GO:0010742	macrophage derived foam cell differentiation	22	0.450103	1.78737	0.0110978	0.0593885	0.0447329	2363	tags=68%	list=32%	signal=46%	1435/185/183/7474/4792/10062/6646/5320/23461/5601/1437/3606/3690/4023/4481
BP	GO:0030224	monocyte differentiation	23	0.449336	1.81345	0.0111285	0.0594996	0.0448166	2185	tags=65%	list=30%	signal=46%	1435/4627/7422/677/3635/22985/81501/920/8544/2194/1437/1436/2242/3428/5138
BP	GO:0002495	antigen processing and presentation of peptide antigen via MHC class II	19	0.47908	1.7925	0.0113418	0.0605851	0.0456342	875	tags=42%	list=12%	signal=37%	2213/54209/7189/1509/55016/81622/2207/1515
BP	GO:0051493	regulation of cytoskeleton organization	275	0.240998	1.46191	0.0114335	0.0609103	0.0458792	2242	tags=39%	list=30%	signal=28%	5880/1490/5341/9535/6281/5563/6280/6279/71/11151/246/2185/9353/8477/10297/26999/28984/5048/8874/1902/636/84952/3303/81553/10435/4133/5063/2934/5580/129446/2006/146057/51466/5156/4137/120/2288/100506658/116985/3055/9344/10109/7168/3925/1729/2316/961/6709/5962/57026/7043/25999/3552/7408/10565/5999/8440/26146/57580/128866/5202/7429/11034/6385/10763/1901/22919/90102/55704/27067/157922/9525/140469/107…
BP	GO:0007610	behavior	306	0.233547	1.42525	0.0114335	0.0609103	0.0458792	1729	tags=30%	list=23%	signal=24%	5743/477/6774/84189/6648/9456/9518/482/56729/54209/1385/5270/1374/5048/5108/6310/2534/8648/1272/2354/9215/4862/4192/57144/8516/2717/6547/1636/1476/353/2115/4137/9572/285671/4929/6616/1803/164312/1602/9611/4544/1981/1827/7067/23236/11202/55737/2353/894/1454/4208/80243/3398/10769/3251/134/3357/4212/4867/3170/3776/94101/20/6506/348/11245/7057/1958/6328/5079/7419/5896/26058/460/596/7832/26258/6326/26…
BP	GO:0045596	negative regulation of cell differentiation	380	0.227156	1.40382	0.0114335	0.0609103	0.0458792	2275	tags=38%	list=31%	signal=28%	4139/11007/3479/28959/4318/8993/6774/27250/57761/55810/9759/6648/11006/2213/969/54209/3627/2185/221476/53335/6664/595/3202/4067/1656/7704/5108/80031/10363/55553/4133/4780/3956/4192/6608/301/6591/7498/23414/627/30812/2202/3488/7538/359845/6772/9572/5167/650/5997/26585/3553/8840/11221/861/2308/811/25805/4054/7422/7474/6659/93166/862/2624/9745/10234/677/5802/3398/3552/1050/3635/2625/3707/4792/3142/5…
BP	GO:0046890	regulation of lipid biosynthetic process	91	0.296865	1.61839	0.0114907	0.0611599	0.0460672	1500	tags=30%	list=20%	signal=24%	83643/5743/2171/718/26137/2181/57761/225/221395/1385/5580/6591/9572/650/3553/3490/27122/3552/3357/10062/33/94101/20/348/1958/653/6615
BP	GO:0009409	response to cold	17	0.503362	1.82627	0.0115694	0.0615237	0.0463412	1136	tags=47%	list=15%	signal=40%	51316/1153/3320/3329/7351/2308/7067/4792
BP	GO:0001510	RNA methylation	29	-0.270969	-1.93599	0.0116127	0.0616827	0.0464609	5384	tags=100%	list=73%	signal=27%	152992/6635/6636/6637/6632/6628/131965/10436/207/3028/117246/54888/6634/83640/81627/64216/1787/221078/29081/79828/196074/9836/51605/144233/25917/55695/56257/55039
CC	GO:0097386	glial cell projection	23	0.448415	1.80973	0.0116306	0.0616827	0.0464609	1723	tags=52%	list=23%	signal=40%	2706/482/2534/3936/6332/4137/2752/3776/6506/23432/4504/23657
BP	GO:0045672	positive regulation of osteoclast differentiation	16	0.504019	1.79357	0.0116262	0.0616827	0.0464609	2459	tags=75%	list=33%	signal=50%	1435/54209/1385/7189/7305/2353/8792/3593/4853/7124/1230/5457
BP	GO:0055017	cardiac muscle tissue growth	50	0.359079	1.77449	0.0116832	0.0619063	0.0466294	1342	tags=36%	list=18%	signal=30%	3479/8470/221476/7472/23414/9472/2296/5997/861/6909/57493/148/26011/4208/10611/5999/3776/1901
CC	GO:0031093	platelet alpha granule lumen	47	0.354724	1.73447	0.0117324	0.0621114	0.0467839	1738	tags=43%	list=24%	signal=33%	3479/12/7076/2335/1191/2277/3671/10916/226/7422/7043/29789/5768/5552/7057/2153/5004/5054/197/213
MF	GO:0038024	cargo receptor activity	41	0.368675	1.75193	0.0117696	0.062197	0.0468483	960	tags=32%	list=13%	signal=28%	93556/3684/7448/55576/4036/5168/8685/5167/84466/10894/57007/4360/10216
BP	GO:0043122	regulation of canonical NF-kappaB signal transduction	146	0.272271	1.57372	0.0117677	0.062197	0.0468483	1221	tags=27%	list=17%	signal=23%	2597/6774/841/10783/2099/2950/5579/11006/338339/54209/55504/1902/8837/3956/10868/10010/7189/1893/6772/9572/92610/3553/140885/3162/2316/3611/7422/7474/3552/10769/7105/9641/64170/3357/10133/80762/4792/7188/6574
BP	GO:0009314	response to radiation	199	0.250656	1.4886	0.0118938	0.0627975	0.0473007	1741	tags=31%	list=24%	signal=24%	581/477/5788/4318/4313/8553/84236/7222/7076/6648/5603/1281/1026/6354/3627/1396/339/595/9215/1153/5371/2876/1410/5580/6591/10010/5599/164312/4239/847/3694/7056/2353/894/7412/10276/2063/3398/3552/2625/7520/90427/4212/7391/4867/55766/6506/598/1958/5896/23596/8864/596/4314/64782/3815/51426/3593/4193/23657/9768/55872
BP	GO:0062012	regulation of small molecule metabolic process	164	0.257421	1.5065	0.0119057	0.0628044	0.0473059	1546	tags=27%	list=21%	signal=22%	5743/3479/2171/5341/6774/2327/26137/57761/225/9759/9023/5230/5563/9518/54209/2168/93974/1385/1374/3667/130013/2326/6591/5745/9572/650/3553/3486/2308/9611/27122/3487/26471/8671/10062/33/2271/348/1958/9555/653/151176/51744/6615/80025
BP	GO:0055078	sodium ion homeostasis	23	0.446173	1.80069	0.0119653	0.0630625	0.0475002	1030	tags=39%	list=14%	signal=34%	477/481/482/185/6557/6332/183/6558/3552
MF	GO:0005501	retinoid binding	15	0.50094	1.73133	0.0119943	0.0631031	0.0475308	1579	tags=53%	list=21%	signal=42%	2171/1381/56603/3482/9227/23596/733/116362
MF	GO:0019840	isoprenoid binding	15	0.50094	1.73133	0.0119943	0.0631031	0.0475308	1579	tags=53%	list=21%	signal=42%	2171/1381/56603/3482/9227/23596/733/116362
BP	GO:1900016	negative regulation of cytokine production involved in inflammatory response	19	0.476892	1.78432	0.0120344	0.0632581	0.0476476	1050	tags=37%	list=14%	signal=32%	7850/27250/225/11006/54209/140885/113
BP	GO:0071248	cellular response to metal ion	83	0.299413	1.60845	0.0120453	0.0632593	0.0476485	1721	tags=36%	list=23%	signal=28%	5743/7018/5563/246/1385/2354/79800/4780/6556/3162/7351/811/1800/7474/6558/2353/4208/1050/113/3707/3756/241/3745/6263/4502/4504/567/3777/114/4884
BP	GO:0050854	regulation of antigen receptor-mediated signaling pathway	41	0.367553	1.7466	0.0120855	0.0634141	0.0477651	2270	tags=54%	list=31%	signal=37%	3958/5788/123920/11006/2213/9214/4067/5795/975/8525/100/3932/26228/4068/930/23228/634/4690/5777/7070/8517/7430
BP	GO:0002717	positive regulation of natural killer cell mediated immunity	18	0.463329	1.71063	0.0121045	0.0634574	0.0477977	1671	tags=56%	list=23%	signal=43%	8807/10125/3821/22914/116449/3824/3823/4068/3593/135250
BP	GO:0045862	positive regulation of proteolysis	112	0.285998	1.59368	0.0121405	0.0635901	0.0478977	1385	tags=29%	list=19%	signal=24%	7018/4323/6774/841/84236/57761/6281/54209/2185/26999/93974/4067/3303/4780/2934/1191/10010/440730/1512/2729/285671/3553/4627/26471/1454/1050/84231/3300/10444/348/641700/5701
BP	GO:0042730	fibrinolysis	15	0.500697	1.73049	0.0121774	0.0637269	0.0480007	1711	tags=60%	list=23%	signal=46%	7448/5329/7056/7391/7057/5327/2191/5054/5328
BP	GO:0034143	regulation of toll-like receptor 4 signaling pathway	19	0.475864	1.78047	0.0122076	0.0637916	0.0480494	1429	tags=47%	list=19%	signal=38%	338382/929/54209/92747/4067/57590/9572/10062/3929
BP	GO:0048639	positive regulation of developmental growth	77	0.321277	1.70605	0.0122113	0.0637916	0.0480494	2447	tags=51%	list=33%	signal=34%	3479/10409/1435/2335/53335/7852/1385/5048/2690/1002/6608/7472/23414/627/23499/9472/4137/6909/23236/7422/4208/7490/3142/7429/596/2691/6857/23191/657/9037/6910/55636/5292/5629/10507/7430/6531/3084/9423
BP	GO:0007548	sex differentiation	139	0.270837	1.5592	0.0122297	0.0638314	0.0480794	1186	tags=26%	list=16%	signal=22%	581/10409/4323/4313/10184/2099/56729/9353/5798/2295/3148/4036/8648/23414/30812/4254/1636/1051/5156/2288/2296/10461/22836/1602/2316/7422/7474/51742/6943/26471/9510/558/7490/3552/2625/10018
BP	GO:0072091	regulation of stem cell proliferation	53	0.348181	1.73833	0.0122719	0.0639952	0.0482028	1243	tags=34%	list=17%	signal=28%	5788/135228/6664/3148/7481/6591/2192/4254/64321/1636/55612/4054/7474/4072/677/1050/5396/3664
BP	GO:0033627	cell adhesion mediated by integrin	62	0.328524	1.69302	0.012287	0.0640176	0.0482197	2441	tags=53%	list=33%	signal=36%	6850/8631/6352/3684/7448/4067/6591/340485/8516/55612/1803/3676/3694/7412/11117/100/916/3071/5054/3682/3976/5328/83706/3689/3690/83700/5294/5777/9358/3683/1969/255743/3383
BP	GO:0021884	forebrain neuron development	14	0.50434	1.71989	0.0123003	0.0640306	0.0482295	895	tags=43%	list=12%	signal=38%	26468/8828/9353/6091/22809/7474
MF	GO:0031420	alkali metal ion binding	12	0.533526	1.71622	0.0123283	0.0640638	0.0482545	564	tags=42%	list=8%	signal=39%	477/9759/6996/5315/10568
BP	GO:1904037	positive regulation of epithelial cell apoptotic process	11	0.542067	1.69891	0.0123262	0.0640638	0.0482545	1420	tags=55%	list=19%	signal=44%	581/7481/2934/6789/3162/22925
BP	GO:0042744	hydrogen peroxide catabolic process	15	0.499487	1.72631	0.0123605	0.0641187	0.0482958	1569	tags=53%	list=21%	signal=42%	5052/3039/2876/847/3240/3043/2878/4504
BP	GO:1901343	negative regulation of vasculature development	83	0.298406	1.60304	0.0123522	0.0641187	0.0482958	2221	tags=45%	list=30%	signal=32%	10365/23213/55810/5230/3627/28984/3202/2534/11005/10218/5371/1634/1284/1386/57556/6772/2296/140862/6558/9510/10769/11117/7057/641700/90993/5054/7010/22905/7058/729230/1647/5777/9723/64218/10253/7124/22846
BP	GO:0006790	sulfur compound metabolic process	138	0.269441	1.54915	0.0123797	0.0641624	0.0483287	1782	tags=33%	list=24%	signal=26%	2328/50507/23213/51022/2181/6648/5230/2950/10164/10560/55959/3158/3425/2690/79717/2936/2182/4780/2876/2326/58472/9435/2729/5167/2817/11332/2949/1800/10654/51144/4522/1036/2940/10380/2937/6506/8534/80704/9317/80025/2939/4258/23657/4143/119391/8459
CC	GO:0030964	NADH dehydrogenase complex	32	0.390778	1.74547	0.0124132	0.0642234	0.0483747	3502	tags=84%	list=47%	signal=44%	4710/4705/51079/4713/4696/4698/4702/4700/4714/54539/4695/4694/4718/4715/4711/4716/126328/4708/4717/4712/4726/4706/55967/4709/4731/4729/4728
CC	GO:0045271	respiratory chain complex I	32	0.390778	1.74547	0.0124132	0.0642234	0.0483747	3502	tags=84%	list=47%	signal=44%	4710/4705/51079/4713/4696/4698/4702/4700/4714/54539/4695/4694/4718/4715/4711/4716/126328/4708/4717/4712/4726/4706/55967/4709/4731/4729/4728
BP	GO:0051046	regulation of secretion	291	0.232476	1.41421	0.0124797	0.0645113	0.0485915	2217	tags=38%	list=30%	signal=28%	5880/3479/7447/6850/8832/84236/2181/27063/6352/6281/5579/3684/6279/2213/56729/1731/57126/54209/4756/6664/185/5798/1131/28984/2778/5906/1385/4067/1374/2182/8609/3667/301/4628/4282/9572/5321/650/115827/6616/3553/183/7351/2308/4544/23236/6558/55737/6659/7043/2624/4208/4646/1080/3552/7779/134/6754/8792/7273/10062/3170/3745/348/6385/1535/54972/285381/22925/6688/9525/8864/57617/100/2691/3071/2151/3624/…
MF	GO:0015026	coreceptor activity	38	0.384624	1.79224	0.0125205	0.0645528	0.0486228	2421	tags=61%	list=33%	signal=41%	8807/7852/2239/2022/57007/940/3676/10266/4038/3929/3595/920/10663/925/942/1464/3556/4040/1234/1439/3690/941/8434
BP	GO:0051131	chaperone-mediated protein complex assembly	11	0.541142	1.69601	0.0125144	0.0645528	0.0486228	1291	tags=55%	list=18%	signal=45%	3326/3303/1191/3320/3329/10728
BP	GO:0071774	response to fibroblast growth factor	94	0.296929	1.62549	0.0125179	0.0645528	0.0486228	2424	tags=49%	list=33%	signal=33%	1490/23213/6352/6347/55959/1277/3371/960/8817/10631/7538/5156/2729/2817/387914/10461/7356/6909/7474/677/558/2591/2625/25778/4921/7057/5770/90993/3815/7010/8862/4915/2885/23768/8074/1436/2047/9241/64094/10253/81848/1969/4916/2050/5159/9378
BP	GO:0045923	positive regulation of fatty acid metabolic process	19	0.474732	1.77623	0.0125539	0.0646689	0.0487102	1184	tags=42%	list=16%	signal=35%	5743/225/9518/2168/1374/3667/3553/10062
BP	GO:0140896	cGAS/STING signaling pathway	16	-0.36798	-1.82238	0.0125963	0.0648312	0.0488325	1781	tags=62%	list=24%	signal=48%	142/127018/5537/51428/84243/57505/29110/340061/6885/9212
BP	GO:0003351	epithelial cilium movement involved in extracellular fluid movement	19	-0.352478	-1.91596	0.0126182	0.0648873	0.0488747	2858	tags=79%	list=39%	signal=48%	8701/361/152110/25911/55582/80217/8382/79582/27148/164781/200373/29922/55811/25790/27019
BP	GO:0050873	brown fat cell differentiation	28	0.419291	1.79119	0.0126604	0.0649914	0.0489531	1031	tags=36%	list=14%	signal=31%	5743/51316/116844/1051/5997/11221/9580/3914/2624/1050
BP	GO:0051258	protein polymerization	149	0.271889	1.57648	0.0126545	0.0649914	0.0489531	2310	tags=44%	list=31%	signal=31%	7448/11151/246/2185/9353/26999/8874/3303/81553/10435/4133/5063/2934/5580/2006/51466/4137/120/2288/100506658/3055/3320/10109/3925/1729/6709/5962/51199/25999/7408/7756/10565/8440/57580/128866/7429/2879/22919/4134/22921/157922/2801/10787/55142/221074/3071/7454/84722/2885/23191/9873/163782/51571/5058/56907/256949/11078/3304/50853/199/2242/4690/5216/23242/1003/29766
BP	GO:0060350	endochondral bone morphogenesis	38	0.383337	1.78624	0.0126799	0.0650355	0.0489864	1003	tags=34%	list=14%	signal=30%	4323/1281/4209/249/2690/162466/1277/8817/1386/2296/871/85301/4208
MF	GO:0097718	disordered domain specific binding	15	0.49844	1.72269	0.0127267	0.065219	0.0491246	748	tags=40%	list=10%	signal=36%	2597/3326/2534/3303/8463/3320
BP	GO:0046635	positive regulation of alpha-beta T cell activation	42	0.378506	1.80515	0.0127714	0.0653912	0.0492543	2163	tags=52%	list=29%	signal=37%	5788/6850/11006/7704/301/5588/975/1604/940/861/3707/3142/100/916/3071/10148/3593/942/50943/729230/3606/3566
BP	GO:0071229	cellular response to acid chemical	59	0.341164	1.73845	0.0128168	0.0655673	0.0493869	1729	tags=39%	list=23%	signal=30%	5743/10365/4313/1281/53335/3158/2534/4780/1277/1278/1282/1051/5156/2729/445/6494/7422/26012/598/8452/4314/58528/4915
BP	GO:0006636	unsaturated fatty acid biosynthetic process	27	0.421462	1.77962	0.0128972	0.0659215	0.0496537	793	tags=33%	list=11%	signal=30%	5743/2171/225/246/5740/4282/5321/3553/5742
BP	GO:0003279	cardiac septum development	66	0.320191	1.66447	0.013006	0.0664202	0.0500294	2243	tags=48%	list=30%	signal=34%	187/8828/9353/6664/4036/7481/6608/6091/23414/129446/2022/6909/57493/7474/6659/2625/11064/8543/653/11174/90/4193/6299/657/6910/3491/55636/9241/4853/5138/5629/10512
BP	GO:0045056	transcytosis	14	0.502152	1.71242	0.0130292	0.0664813	0.0500754	917	tags=43%	list=12%	signal=38%	5284/2813/9214/4036/2217/55737
BP	GO:0090130	tissue migration	62	0.326802	1.68414	0.0130597	0.0665799	0.0501496	1500	tags=34%	list=20%	signal=27%	72/4318/9448/70/11151/116844/6591/5168/23499/4254/1512/51466/55612/11221/7474/29941/59/152007/7429/57142/6615
CC	GO:0031252	cell leading edge	258	0.242074	1.46148	0.0130776	0.0666135	0.0501749	1535	tags=28%	list=21%	signal=23%	5880/72/5341/121512/841/65059/7431/70/57126/11151/2185/8470/10297/7852/2778/5048/1000/2245/8874/747/5795/960/2934/4628/51177/3936/23499/8516/4254/51466/4137/100506658/6616/92154/55612/1803/4627/10109/7168/1729/3611/9265/5962/23625/57026/4830/4646/133746/84168/4638/10006/134/7408/57147/54518/10044/25963/3745/6506/8525/27131/59/7429/8543/8633/90102/55704/26258/2191/10787/255189
BP	GO:0043549	regulation of kinase activity	215	0.245877	1.46842	0.0130906	0.0666228	0.050182	1416	tags=26%	list=19%	signal=22%	50507/3479/1116/5788/10125/27250/142679/57761/11122/2950/1026/11006/54209/2185/100133941/595/28984/5906/4067/2690/3301/51719/5795/5580/6091/4908/8817/7189/6547/5997/3553/11221/183/9344/56892/57493/7474/23531/894/5899/80243/10006/7520/64853/25778/4921/8792/348/57580/7057/9555/8543/1028/5770/55704/58533
BP	GO:0030865	cortical cytoskeleton organization	33	0.395113	1.78421	0.0132245	0.0671887	0.0506082	2270	tags=55%	list=31%	signal=38%	5880/5341/2185/8496/5048/3996/3936/112464/811/7429/114793/10787/3071/3993/23136/1894/391/7430
BP	GO:0002504	antigen processing and presentation of peptide or polysaccharide antigen via MHC class II	20	0.448326	1.7014	0.0132159	0.0671887	0.0506082	1298	tags=45%	list=18%	signal=37%	2213/54209/7189/1509/55016/81622/2207/1515/7057
BP	GO:0045833	negative regulation of lipid metabolic process	55	0.338179	1.70506	0.0132967	0.0674976	0.0508408	1500	tags=35%	list=20%	signal=28%	83643/2327/57761/9023/339/2326/6591/650/3553/26580/9611/27122/134/33/94101/20/348/653/6615
BP	GO:0050919	negative chemotaxis	33	0.394393	1.78096	0.0133868	0.0678966	0.0511414	2447	tags=64%	list=33%	signal=43%	8828/9353/54910/6091/223117/1803/7474/59352/8633/9037/23768/3690/7869/9723/6405/64218/10507/10512/56920/3084/9423
BP	GO:0046209	nitric oxide metabolic process	51	0.337011	1.67053	0.0134223	0.0680184	0.0512332	1359	tags=33%	list=18%	signal=27%	5743/10365/2099/6648/3326/2185/1191/5740/2717/3553/3320/140885/445/961/3043/348/64581
BP	GO:0009166	nucleotide catabolic process	76	0.31155	1.65107	0.0134539	0.0681204	0.05131	1069	tags=26%	list=14%	signal=23%	3479/2597/3939/6774/26137/9759/5230/5563/6996/957/5315/7498/8654/7351/226/9611/26471/5223/3251/8671
BP	GO:0046850	regulation of bone remodeling	28	0.41681	1.78059	0.0134878	0.0682339	0.0513955	2167	tags=57%	list=29%	signal=41%	7018/6850/54849/4192/26585/4054/3635/8792/1901/81501/57817/9842/101/1436/1445/3690
BP	GO:0035914	skeletal muscle cell differentiation	44	0.362811	1.74824	0.0135359	0.0683603	0.0514907	1481	tags=39%	list=20%	signal=31%	27063/6664/4209/283149/56603/9215/30812/2817/84466/467/10362/2353/26471/4208/1958/5079/7832
BP	GO:0051248	negative regulation of protein metabolic process	393	0.227911	1.41091	0.0135259	0.0683603	0.0514907	1481	tags=25%	list=20%	signal=21%	7850/3479/2597/5788/55024/27250/8832/142679/57761/11122/8507/56271/7076/5563/2950/3326/1026/11006/7448/54209/9353/5270/4067/1656/5273/2534/9470/11005/10363/3303/3301/23112/1153/5795/5371/51377/6608/1410/5580/1191/7498/2192/4908/9452/3488/6547/1893/7538/1476/4282/2729/4137/116496/56776/5167/100506658/5997/3553/64943/11221/183/23057/871/3486/2316/57493/1981/811/7078/3609/10362/55737/6659/2058/5269/…
BP	GO:0008630	intrinsic apoptotic signaling pathway in response to DNA damage	60	0.329646	1.68887	0.0135795	0.0684638	0.0515686	1500	tags=35%	list=20%	signal=28%	581/6648/1026/23612/1396/51065/5371/960/1191/6591/4282/57007/7178/26471/3090/9641/10018/598/6498/596/6615
BP	GO:0006754	ATP biosynthetic process	60	0.329568	1.68847	0.0135795	0.0684638	0.0515686	3502	tags=77%	list=47%	signal=41%	4710/54209/93974/523/226/506/4705/51079/4713/514/7114/4696/517/10632/9551/4698/4702/509/4700/4714/516/522/539/54539/513/10476/4695/4694/4718/4715/518/4711/515/4716/126328/4708/4717/4712/4726/7415/4706/55967/4709/4731/4729/4728
BP	GO:0032956	regulation of actin cytoskeleton organization	195	0.254364	1.50969	0.0136754	0.0688886	0.0518886	2242	tags=41%	list=30%	signal=29%	5880/1490/5341/9535/6281/71/11151/246/2185/9353/8477/26999/28984/1902/84952/81553/10435/5063/2934/5580/129446/2006/51466/5156/120/116985/3055/9344/10109/7168/3925/2316/961/6709/5962/57026/7043/3552/7408/10565/5999/8440/57580/7429/11034/6385/1901/90102/55704/27067/140469/10787/3071/7454/2885/23191/9873/9037/163782/51571/5058/11214/256949/11078/50853/27289/1436/1894/3690/83700/4690/23647/5629/5829/…
CC	GO:0042101	T cell receptor complex	16	0.498469	1.77381	0.0137891	0.0691938	0.0521185	2195	tags=69%	list=30%	signal=48%	6850/8631/54518/919/916/920/925/6957/214/634/5777
BP	GO:0006110	regulation of glycolytic process	23	0.439428	1.77347	0.013806	0.0691938	0.0521185	1069	tags=35%	list=14%	signal=30%	3479/6774/26137/9759/5563/9611/26471/8671
BP	GO:0030811	regulation of nucleotide catabolic process	23	0.439428	1.77347	0.013806	0.0691938	0.0521185	1069	tags=35%	list=14%	signal=30%	3479/6774/26137/9759/5563/9611/26471/8671
BP	GO:0033121	regulation of purine nucleotide catabolic process	23	0.439428	1.77347	0.013806	0.0691938	0.0521185	1069	tags=35%	list=14%	signal=30%	3479/6774/26137/9759/5563/9611/26471/8671
BP	GO:0002478	antigen processing and presentation of exogenous peptide antigen	21	0.447948	1.73563	0.0137954	0.0691938	0.0521185	875	tags=38%	list=12%	signal=34%	54842/2213/7189/1509/81622/219972/2207/1515
BP	GO:0021782	glial cell development	72	0.319573	1.67921	0.0137897	0.0691938	0.0521185	982	tags=29%	list=13%	signal=26%	7431/6280/712/6279/54209/6664/4067/1902/1272/4192/6608/1191/4137/57211/9572/54587/3553/3611/6659/26011/3459
BP	GO:0009132	nucleoside diphosphate metabolic process	64	0.33014	1.71168	0.0139009	0.069588	0.0524154	1069	tags=27%	list=14%	signal=23%	3479/2597/3939/6774/26137/9759/5230/5563/957/203/5315/7351/226/9611/26471/5223/8671
CC	GO:0090575	RNA polymerase II transcription regulator complex	123	0.274151	1.55386	0.0139082	0.069588	0.0524154	2029	tags=39%	list=28%	signal=29%	51176/6774/60468/6281/6775/55509/1385/8648/283149/4862/4780/8463/1386/1051/6772/1052/4783/22809/467/2958/6421/861/7067/83439/1628/2353/6932/1050/6258/10062/7090/6939/10589/8543/219541/9935/3131/5450/1649/4760/4086/9519/7003/7068/2966/1876/4618/4087
BP	GO:0021954	central nervous system neuron development	44	0.36162	1.74251	0.0140108	0.0699295	0.0526727	2203	tags=52%	list=30%	signal=37%	26468/8828/9353/5048/1009/4133/6091/4137/4929/22809/7474/2624/51199/3251/7832/56978/4915/104/25987/64283/2047/5361/9723
BP	GO:0042310	vasoconstriction	49	0.351839	1.73131	0.0140355	0.0699295	0.0526727	1476	tags=35%	list=20%	signal=28%	5743/477/4313/147/185/490/1636/120/183/7873/3676/4544/148/143872/3357/59/8864
BP	GO:0097066	response to thyroid hormone	13	0.515092	1.7051	0.0140141	0.0699295	0.0526727	897	tags=46%	list=12%	signal=41%	51719/1508/1636/1512/2729/5962
BP	GO:0046849	bone remodeling	52	0.331855	1.65095	0.0140355	0.0699295	0.0526727	2379	tags=50%	list=32%	signal=34%	5880/50507/7018/6850/2185/54849/4192/5745/7189/26585/4054/3635/8792/1901/81501/57817/9842/51384/101/1436/1445/3690/4853/5764/1969/29887
BP	GO:0019217	regulation of fatty acid metabolic process	52	0.330705	1.64523	0.0140355	0.0699295	0.0526727	1546	tags=33%	list=21%	signal=26%	5743/2171/2327/57761/225/5230/9518/2168/1374/3667/2326/3553/9611/10062/33/151176/80025
BP	GO:0001516	prostaglandin biosynthetic process	19	0.471112	1.76269	0.0141123	0.070194	0.0528719	1535	tags=47%	list=21%	signal=38%	5743/2171/5740/4282/5321/3553/5742/10728/255189
BP	GO:0046457	prostanoid biosynthetic process	19	0.471112	1.76269	0.0141123	0.070194	0.0528719	1535	tags=47%	list=21%	signal=38%	5743/2171/5740/4282/5321/3553/5742/10728/255189
BP	GO:0002689	negative regulation of leukocyte chemotaxis	16	0.49761	1.77076	0.0141496	0.0703208	0.0529674	1620	tags=56%	list=22%	signal=44%	6347/9353/27202/100532736/4282/26585/1803/22914/26228
[truncated: 91 more rows]

## Sheet: rodent_gsea_reactome
ID	Description	setSize	enrichmentScore	NES	pvalue	p.adjust	qvalue	rank	leading_edge	core_enrichment
[truncated: 113 more rows]

[truncated: 4 more sheets: rodent_gsea_kegg, rodent_ora_go, rodent_ora_reactome, rodent_ora_kegg]
