# Supplementary material for: Systems-Level Insights into Bronchopulmonary Dysplasia from Meta-Analysis of Genome- Scale Studies
Source: Research Square preprint supplement (doi:10.21203/rs.3.rs-8552464/v1), 2026-01-21
Supplement: Supplementary file 5 [file f51487e8408e227b630e76ae.xlsx]

## Sheet: ards_bpd_ora_go
ONTOLOGY	ID	Description	GeneRatio	BgRatio	RichFactor	FoldEnrichment	zScore	pvalue	p.adjust	qvalue	geneID	Count
BP	GO:0002696	positive regulation of leukocyte activation	14/111	372/18805	0.0376344086021505	6.37581129516613	8.0696177914388	4.0790352999476e-08	3.69554180714537e-05	3.1106180679452e-05	HLA-DQB1/IL1RL1/CR1/HLA-DPB1/CD55/CD40/CD83/HLA-DRA/HLA-DQA1/CD2/CD3E/CD4/IGFBP2/MMP8	14
BP	GO:0032609	type II interferon production	9/111	124/18805	0.0725806451612903	12.2962074978204	9.72476096348943	5.04855438134614e-08	3.69554180714537e-05	3.1106180679452e-05	IL1R1/IL18R1/ISG15/IL1RL1/CR1/HLA-DPB1/CRTAM/CD2/CD3E	9
BP	GO:0032649	regulation of type II interferon production	9/111	124/18805	0.0725806451612903	12.2962074978204	9.72476096348943	5.04855438134614e-08	3.69554180714537e-05	3.1106180679452e-05	IL1R1/IL18R1/ISG15/IL1RL1/CR1/HLA-DPB1/CRTAM/CD2/CD3E	9
BP	GO:0050867	positive regulation of cell activation	14/111	392/18805	0.0357142857142857	6.0505148005148	7.78667227551593	7.80132357449447e-08	3.7637034312984e-05	3.1679911922922e-05	HLA-DQB1/IL1RL1/CR1/HLA-DPB1/CD55/CD40/CD83/HLA-DRA/HLA-DQA1/CD2/CD3E/CD4/IGFBP2/MMP8	14
BP	GO:0050863	regulation of T cell activation	14/111	395/18805	0.0354430379746835	6.00456152354887	7.7459230388236	8.56945225705465e-08	3.7637034312984e-05	3.1679911922922e-05	HLA-DQB1/CR1/HLA-DPB1/TNFRSF9/CD55/CD83/HLA-DRA/HLA-DQA1/CRTAM/CD2/CD3E/CD4/IGFBP2/PRDM1	14
BP	GO:0002443	leukocyte mediated immunity	15/111	483/18805	0.031055900621118	5.26131721783896	7.31082658248187	1.59567423282118e-07	5.8401676921255e-05	4.91579640848067e-05	IL1R1/IL18R1/CR1/CLU/CD55/CD177/IGHG1/ANXA3/BTN3A3/CD40/HLA-DRA/CRTAM/FCMR/CD2/C1QA	15
BP	GO:0007159	leukocyte cell-cell adhesion	14/111	433/18805	0.0323325635103926	5.47760231363003	7.26351335839851	2.6295992054057e-07	8.24942836438704e-05	6.94372361607882e-05	HLA-DQB1/LRG1/CR1/HLA-DPB1/CD55/CD177/APOA4/CD83/HLA-DRA/HLA-DQA1/CRTAM/CD3E/CD4/IGFBP2	14
BP	GO:0032729	positive regulation of type II interferon production	7/111	78/18805	0.0897435897435897	15.2038577038577	9.68623497879776	3.85893892774816e-07	0.000105426943387309	8.87401555882054e-05	IL1R1/IL18R1/ISG15/HLA-DPB1/CRTAM/CD2/CD3E	7
BP	GO:0002449	lymphocyte mediated immunity	13/111	384/18805	0.0338541666666667	5.73538382132132	7.22436514112049	4.32077636833232e-07	0.000105426943387309	8.87401555882054e-05	IL1R1/IL18R1/CR1/CLU/CD55/IGHG1/BTN3A3/CD40/HLA-DRA/CRTAM/FCMR/CD2/C1QA	13
BP	GO:0002460	adaptive immune response based on somatic recombination of immune receptors built from immunoglobulin superfamily domains	13/111	396/18805	0.0328282828282828	5.56158431158431	7.06941849723776	6.11680354758286e-07	0.00013432500590492	0.000113064284521637	IL1R1/IL18R1/IL1RL1/CR1/CLU/CD55/IGHG1/BTN3A3/CD40/HLA-DRA/FCMR/CD4/C1QA	13
BP	GO:0002455	humoral immune response mediated by circulating immunoglobulin	6/111	54/18805	0.111111111111111	18.8238238238238	10.1069713656637	7.57057751778066e-07	0.000151136256627694	0.000127214680585864	CR1/CLU/CD55/IGHG1/FCMR/C1QA	6
BP	GO:0030098	lymphocyte differentiation	13/111	432/18805	0.0300925925925926	5.09811895228562	6.64005822301726	1.61628989635211e-06	0.000295781051032437	0.000248965355964413	IL18R1/CR1/ITM2A/TNFRSF9/CD83/HLA-DRA/CRTAM/HDAC9/CD2/CD3E/CD4/PIK3R3/PRDM1	13
BP	GO:0002399	MHC class II protein complex assembly	4/111	16/18805	0.25	42.3536036036036	12.751374769748	1.98116104410423e-06	0.000310759260918063	0.000261572841612558	HLA-DQB1/HLA-DPB1/HLA-DRA/HLA-DQA1	4
BP	GO:0002503	peptide antigen assembly with MHC class II protein complex	4/111	16/18805	0.25	42.3536036036036	12.751374769748	1.98116104410423e-06	0.000310759260918063	0.000261572841612558	HLA-DQB1/HLA-DPB1/HLA-DRA/HLA-DQA1	4
BP	GO:0006959	humoral immune response	11/111	309/18805	0.0355987055016181	6.03093384646783	6.87107089370854	2.17162522047637e-06	0.00031792593227774	0.000267605185063614	CXCL8/HLA-DQB1/CR1/CLU/CD55/IGHG1/CD83/FCMR/TF/C1QA/DEFA4	11
BP	GO:0050870	positive regulation of T cell activation	10/111	261/18805	0.0383141762452107	6.49097373235304	6.88340625238741	3.36436839578481e-06	0.000442719111574963	0.000372646323423274	HLA-DQB1/CR1/HLA-DPB1/CD55/CD83/HLA-DRA/HLA-DQA1/CD3E/CD4/IGFBP2	10
BP	GO:0030217	T cell differentiation	11/111	324/18805	0.0339506172839506	5.75172394616839	6.64808349470884	3.42724266701929e-06	0.000442719111574963	0.000372646323423274	IL18R1/CR1/TNFRSF9/CD83/HLA-DRA/CRTAM/CD2/CD3E/CD4/PIK3R3/PRDM1	11
BP	GO:0006958	complement activation classical pathway	5/111	40/18805	0.125	21.1768018018018	9.84336366905029	3.6523132407056e-06	0.000445582215366083	0.000375056260273627	CR1/CLU/CD55/IGHG1/C1QA	5
BP	GO:0022409	positive regulation of cell-cell adhesion	11/111	337/18805	0.0326409495548961	5.52984735477317	6.46582694193095	4.98988744042095e-06	0.000541556429942528	0.000455839848039057	HLA-DQB1/CEACAM6/CR1/HLA-DPB1/CD55/CD83/HLA-DRA/HLA-DQA1/CD3E/CD4/IGFBP2	11
BP	GO:0051251	positive regulation of lymphocyte activation	11/111	337/18805	0.0326409495548961	5.52984735477317	6.46582694193095	4.98988744042095e-06	0.000541556429942528	0.000455839848039057	HLA-DQB1/CR1/HLA-DPB1/CD55/CD40/CD83/HLA-DRA/HLA-DQA1/CD3E/CD4/IGFBP2	11
BP	GO:0043691	reverse cholesterol transport	4/111	20/18805	0.2	33.8828828828829	11.3374340891005	5.17881831912254e-06	0.000541556429942528	0.000455839848039057	CLU/APOA1/APOA4/APOC2	4
BP	GO:0002396	MHC protein complex assembly	4/111	21/18805	0.19047619047619	32.2694122694123	11.0476731634657	6.36830590522118e-06	0.000608034772515901	0.000511796117600384	HLA-DQB1/HLA-DPB1/HLA-DRA/HLA-DQA1	4
BP	GO:0002501	peptide antigen assembly with MHC protein complex	4/111	21/18805	0.19047619047619	32.2694122694123	11.0476731634657	6.36830590522118e-06	0.000608034772515901	0.000511796117600384	HLA-DQB1/HLA-DPB1/HLA-DRA/HLA-DQA1	4
BP	GO:1903039	positive regulation of leukocyte cell-cell adhesion	10/111	285/18805	0.0350877192982456	5.94436541804963	6.48108907733915	7.31678140237354e-06	0.000669485498317179	0.000563520532568769	HLA-DQB1/CR1/HLA-DPB1/CD55/CD83/HLA-DRA/HLA-DQA1/CD3E/CD4/IGFBP2	10
BP	GO:0045785	positive regulation of cell adhesion	13/111	499/18805	0.0260521042084168	4.41360197873224	5.95527631546837	7.77515682327105e-06	0.000682969775356129	0.000574870542385851	HLA-DQB1/CEACAM6/CR1/HLA-DPB1/CD55/APOA1/OLFM4/CD83/HLA-DRA/HLA-DQA1/CD3E/CD4/IGFBP2	13
BP	GO:1903037	regulation of leukocyte cell-cell adhesion	11/111	395/18805	0.0278481012658228	4.71786976850268	5.75441683745533	2.20683226232971e-05	0.00186392448002925	0.0015689058512757	HLA-DQB1/CR1/HLA-DPB1/CD55/CD83/HLA-DRA/HLA-DQA1/CRTAM/CD3E/CD4/IGFBP2	11
BP	GO:0002822	regulation of adaptive immune response based on somatic recombination of immune receptors built from immunoglobulin superfamily domains	8/111	204/18805	0.0392156862745098	6.64370252605547	6.24520276425091	2.83916929341028e-05	0.00230919102530703	0.00194369640515729	IL1R1/IL18R1/IL1RL1/CR1/CD55/CD40/HLA-DRA/CD4	8
BP	GO:0097278	complement-dependent cytotoxicity	3/111	11/18805	0.272727272727273	46.2039312039312	11.5557577284008	3.19071721152384e-05	0.00242251776500629	0.00203908599144428	CR1/CD55/IGHG1	3
BP	GO:0019886	antigen processing and presentation of exogenous peptide antigen via MHC class II	4/111	31/18805	0.129032258064516	21.8599244405696	8.95675433532139	3.19913548202106e-05	0.00242251776500629	0.00203908599144428	HLA-DQB1/HLA-DPB1/HLA-DRA/HLA-DQA1	4
BP	GO:0002705	positive regulation of leukocyte mediated immunity	7/111	155/18805	0.0451612903225806	7.65097355419936	6.40688816809708	3.7419615346039e-05	0.00273911584333006	0.00230557349289981	IL1R1/IL18R1/CD55/CD177/CD40/HLA-DRA/CRTAM	7
BP	GO:0006956	complement activation	5/111	65/18805	0.0769230769230769	13.031878031878	7.4875683061148	4.0775633726671e-05	0.00281886422167403	0.00237269944073415	CR1/CLU/CD55/IGHG1/C1QA	5
BP	GO:0034370	triglyceride-rich lipoprotein particle remodeling	3/111	12/18805	0.25	42.3536036036036	11.0418391948766	4.23599814732436e-05	0.00281886422167403	0.00237269944073415	APOA1/APOA4/APOC2	3
BP	GO:0034372	very-low-density lipoprotein particle remodeling	3/111	12/18805	0.25	42.3536036036036	11.0418391948766	4.23599814732436e-05	0.00281886422167403	0.00237269944073415	APOA1/APOA4/APOC2	3
BP	GO:0002819	regulation of adaptive immune response	8/111	219/18805	0.0365296803652968	6.18865440783249	5.95140256480129	4.70116295679516e-05	0.00303639819209476	0.00255580252387997	IL1R1/IL18R1/IL1RL1/CR1/CD55/CD40/HLA-DRA/CD4	8
BP	GO:0002495	antigen processing and presentation of peptide antigen via MHC class II	4/111	35/18805	0.114285714285714	19.3616473616474	8.37816713467114	5.2277044858805e-05	0.00328001115742674	0.00276085686532516	HLA-DQB1/HLA-DPB1/HLA-DRA/HLA-DQA1	4
BP	GO:0043542	endothelial cell migration	9/111	293/18805	0.0307167235494881	5.20385573286597	5.58843796573626	6.03218312633612e-05	0.00367963170706503	0.00309722619001351	APOA1/ANXA3/CD40/CYP1B1/HDAC9/TGFBR3/PIK3R3/LGALS8/GADD45A	9
BP	GO:0019058	viral life cycle	9/111	295/18805	0.0305084745762712	5.16857535501603	5.5607189652425	6.35609552813341e-05	0.00377242858912999	0.00317533534776736	CXCL8/ISG15/CR1/CD55/IFIT1/LAMTOR5/RAB1A/CD4/TOP2A	9
BP	GO:0002504	antigen processing and presentation of peptide or polysaccharide antigen via MHC class II	4/111	37/18805	0.108108108108108	18.3150718285853	8.12365841089142	6.53441040081643e-05	0.00377620137899812	0.00317851098721154	HLA-DQB1/HLA-DPB1/HLA-DRA/HLA-DQA1	4
BP	GO:0033700	phospholipid efflux	3/111	14/18805	0.214285714285714	36.3030888030888	10.182097894342	6.94853558915705e-05	0.00391256003943305	0.00329328704306607	APOA1/APOA4/APOC2	3
BP	GO:0046634	regulation of alpha-beta T cell activation	6/111	123/18805	0.0487804878048781	8.2641177763129	6.22815253319839	8.95910833784827e-05	0.0049185504774787	0.00414005111612146	CD55/CD83/HLA-DRA/CRTAM/CD3E/PRDM1	6
BP	GO:0046470	phosphatidylcholine metabolic process	5/111	77/18805	0.0649350649350649	11.000936000936	6.77603751580771	9.22089698756897e-05	0.00493880238651255	0.00415709758926087	APOA1/APOA4/CAPN2/PLAAT4/MBOAT2	5
BP	GO:0050670	regulation of lymphocyte proliferation	8/111	243/18805	0.0329218106995885	5.57742928113298	5.53411127767471	9.73752521304459e-05	0.00502487150636331	0.0042295438429556	CR1/HLA-DPB1/TNFRSF9/CD55/CD40/CRTAM/CD3E/IGFBP2	8
BP	GO:0002478	antigen processing and presentation of exogenous peptide antigen	4/111	41/18805	0.0975609756097561	16.5282355526258	7.66984907427713	9.83922927020138e-05	0.00502487150636331	0.0042295438429556	HLA-DQB1/HLA-DPB1/HLA-DRA/HLA-DQA1	4
BP	GO:0043534	blood vessel endothelial cell migration	7/111	183/18805	0.0382513661202186	6.4803327918082	5.74056722193468	0.000106787033616906	0.00532964376869829	0.00448607729739919	APOA1/CD40/CYP1B1/HDAC9/TGFBR3/PIK3R3/GADD45A	7
BP	GO:0042129	regulation of T cell proliferation	7/111	184/18805	0.0380434782608696	6.44511359185272	5.71939178227963	0.000110476393098011	0.005352621573454	0.00450541821636719	CR1/HLA-DPB1/TNFRSF9/CD55/CRTAM/CD3E/IGFBP2	7
BP	GO:0032944	regulation of mononuclear cell proliferation	8/111	248/18805	0.032258064516129	5.4649811101424	5.45414995167662	0.00011212230982645	0.005352621573454	0.00450541821636719	CR1/HLA-DPB1/TNFRSF9/CD55/CD40/CRTAM/CD3E/IGFBP2	8
BP	GO:0002824	positive regulation of adaptive immune response based on somatic recombination of immune receptors built from immunoglobulin superfamily domains	6/111	130/18805	0.0461538461538462	7.81912681912682	6.01181530497404	0.000121604204255085	0.00557350536724585	0.00469134091883986	IL1R1/IL18R1/CD55/CD40/HLA-DRA/CD4	6
BP	GO:0002274	myeloid leukocyte activation	8/111	251/18805	0.0318725099601594	5.39966261081799	5.40720642990457	0.000121825253928871	0.00557350536724585	0.00469134091883986	CXCL8/IL1RL1/CLU/CD177/ANXA3/CD2/C1QA/MMP8	8
BP	GO:0002708	positive regulation of lymphocyte mediated immunity	6/111	133/18805	0.0451127819548872	7.64275553749238	5.92398789899142	0.000137833986391754	0.00617721294114882	0.00519949473907455	IL1R1/IL18R1/CD55/CD40/HLA-DRA/CRTAM	6
BP	GO:0002703	regulation of leukocyte mediated immunity	8/111	260/18805	0.0307692307692308	5.21275121275121	5.27077598992001	0.000155189036055225	0.00659185223207435	0.005548505665575	IL1R1/IL18R1/CR1/CD55/CD177/CD40/HLA-DRA/CRTAM	8
BP	GO:0002821	positive regulation of adaptive immune response	6/111	136/18805	0.0441176470588235	7.4741653418124	5.83886191128069	0.000155735343891945	0.00659185223207435	0.005548505665575	IL1R1/IL18R1/CD55/CD40/HLA-DRA/CD4	6
BP	GO:0010562	positive regulation of phosphorus metabolic process	11/111	493/18805	0.0223123732251521	3.78003764413501	4.81994117546991	0.000160661346550404	0.00659185223207435	0.005548505665575	CHI3L1/MMP9/APOC2/NIBAN1/CAPN2/GRB10/CD3E/TF/CD4/PIK3R3/TGFA	11
BP	GO:0045937	positive regulation of phosphate metabolic process	11/111	493/18805	0.0223123732251521	3.78003764413501	4.81994117546991	0.000160661346550404	0.00659185223207435	0.005548505665575	CHI3L1/MMP9/APOC2/NIBAN1/CAPN2/GRB10/CD3E/TF/CD4/PIK3R3/TGFA	11
BP	GO:0002456	T cell mediated immunity	6/111	137/18805	0.0437956204379562	7.41960939041231	5.81106164561812	0.000162094727018222	0.00659185223207435	0.005548505665575	IL1R1/IL18R1/CR1/CD55/BTN3A3/HLA-DRA	6
BP	GO:0001906	cell killing	8/111	263/18805	0.0304182509505703	5.15329017230158	5.22669733340624	0.000167856190109712	0.00670203988147141	0.00564125301115128	CXCL8/CR1/CD55/IGHG1/HLA-DRA/CRTAM/CD2/DEFA4	8
BP	GO:2000516	positive regulation of CD4-positive alpha-beta T cell activation	4/111	48/18805	0.0833333333333333	14.1178678678679	7.01193163305564	0.000183142639899375	0.00712992836652349	0.00600141607305879	CD55/CD83/HLA-DRA/CD3E	4
BP	GO:0002706	regulation of lymphocyte mediated immunity	7/111	200/18805	0.035	5.92950450450451	5.40056154813183	0.000185066446672058	0.00712992836652349	0.00600141607305879	IL1R1/IL18R1/CR1/CD55/CD40/HLA-DRA/CRTAM	7
BP	GO:0046631	alpha-beta T cell activation	7/111	201/18805	0.0348258706467662	5.90000448209403	5.38179104919242	0.000190822719613962	0.00722494297021139	0.00608139193542863	IL18R1/CD55/CD83/HLA-DRA/CRTAM/CD3E/PRDM1	7
BP	GO:0016032	viral process	10/111	421/18805	0.0237529691211401	4.02409535426163	4.83561832513187	0.000195843520168402	0.00728936220830188	0.00613561501187715	CXCL8/ISG15/CR1/CD55/IFIT1/JUN/LAMTOR5/RAB1A/CD4/TOP2A	10
BP	GO:0002699	positive regulation of immune effector process	8/111	270/18805	0.0296296296296296	5.01968635301969	5.12640892026173	0.000200753415754263	0.00730988562224452	0.0061528900166146	IL1R1/IL18R1/CR1/CD55/CD177/CD40/HLA-DRA/CRTAM	8
BP	GO:0070661	leukocyte proliferation	9/111	344/18805	0.0261627906976744	4.4323538654934	4.95084303722576	0.000203052378395681	0.00730988562224452	0.0061528900166146	CR1/HLA-DPB1/CLU/TNFRSF9/CD55/CD40/CRTAM/CD3E/IGFBP2	9
BP	GO:0019884	antigen processing and presentation of exogenous antigen	4/111	50/18805	0.08	13.5531531531532	6.84880477464627	0.000214806925883067	0.00731058929643773	0.00615348231451666	HLA-DQB1/HLA-DPB1/HLA-DRA/HLA-DQA1	4
BP	GO:0016064	immunoglobulin mediated immune response	7/111	205/18805	0.0341463414634146	5.78488244341903	5.30795487677825	0.000215314205487237	0.00731058929643773	0.00615348231451666	CR1/CLU/CD55/IGHG1/CD40/FCMR/C1QA	7
BP	GO:0070663	regulation of leukocyte proliferation	8/111	273/18805	0.0293040293040293	4.96452496452496	5.08448331096879	0.000216388116697838	0.00731058929643773	0.00615348231451666	CR1/HLA-DPB1/TNFRSF9/CD55/CD40/CRTAM/CD3E/IGFBP2	8
BP	GO:0071216	cellular response to biotic stimulus	8/111	273/18805	0.0293040293040293	4.96452496452496	5.08448331096879	0.000216388116697838	0.00731058929643773	0.00615348231451666	CXCL8/MMP9/CD55/CD40/TXNIP/CAPN2/MMP8/DEFA4	8
BP	GO:0019724	B cell mediated immunity	7/111	208/18805	0.0336538461538462	5.70144663894664	5.25384462121855	0.000235299203447302	0.00782904622379205	0.00658987880787021	CR1/CLU/CD55/IGHG1/CD40/FCMR/C1QA	7
BP	GO:0042098	T cell proliferation	7/111	217/18805	0.032258064516129	5.4649811101424	5.09763401874031	0.000304393405087722	0.00997683459063639	0.00839771907830385	CR1/HLA-DPB1/TNFRSF9/CD55/CRTAM/CD3E/IGFBP2	7
CC	GO:0042581	specific granule	12/112	160/19880	0.075	13.3125	11.7700332990862	1.07568203745804e-10	1.39193493744275e-08	9.74278930711418e-09	CHI3L1/HP/LRG1/TCN1/CD177/OLFM4/ANXA3/CEACAM8/CRISP3/HVCN1/MMP8/DEFA4	12
CC	GO:0070820	tertiary granule	12/112	164/19880	0.0731707317073171	12.9878048780488	11.6031817960395	1.43498447159046e-10	1.39193493744275e-08	9.74278930711418e-09	MMP9/HP/LRG1/CR1/TCN1/CD55/CD177/OLFM4/CEACAM8/CRISP3/MMP8/MGAM	12
CC	GO:0035580	specific granule lumen	8/112	62/19880	0.129032258064516	22.9032258064516	13.0016636021104	2.06866279820927e-09	1.33773527617533e-07	9.36342108663145e-08	CHI3L1/HP/LRG1/TCN1/OLFM4/CRISP3/MMP8/DEFA4	8
CC	GO:0034774	secretory granule lumen	14/112	324/19880	0.0432098765432099	7.66975308641975	9.11102334615031	4.02750577103159e-09	1.6459436916246e-07	1.15207127628634e-07	CHI3L1/HP/LRG1/TCN1/CLU/S100A11/APOA1/OLFM4/TTR/CRISP3/LGALS3BP/TF/MMP8/DEFA4	14
CC	GO:0060205	cytoplasmic vesicle lumen	14/112	329/19880	0.0425531914893617	7.5531914893617	9.02175921090821	4.89730696415941e-09	1.6459436916246e-07	1.15207127628634e-07	CHI3L1/HP/LRG1/TCN1/CLU/S100A11/APOA1/OLFM4/TTR/CRISP3/LGALS3BP/TF/MMP8/DEFA4	14
CC	GO:0031983	vesicle lumen	14/112	330/19880	0.0424242424242424	7.53030303030303	9.00413163887438	5.09054749986988e-09	1.6459436916246e-07	1.15207127628634e-07	CHI3L1/HP/LRG1/TCN1/CLU/S100A11/APOA1/OLFM4/TTR/CRISP3/LGALS3BP/TF/MMP8/DEFA4	14
CC	GO:1904724	tertiary granule lumen	7/112	55/19880	0.127272727272727	22.5909090909091	12.0689805542722	2.4200834682846e-08	6.7070884692459e-07	4.69459800614607e-07	MMP9/HP/LRG1/TCN1/OLFM4/CRISP3/MMP8	7
CC	GO:0030139	endocytic vesicle	13/112	358/19880	0.0363128491620112	6.44553072625698	7.82608362084361	1.15011901147213e-07	2.78903860281991e-06	1.95217569052506e-06	HLA-DQB1/HP/HLA-DPB1/APOA1/ANXA3/NCF2/HLA-DRA/HLA-DQA1/TF/CD4/HVCN1/TGFA/WLS	13
CC	GO:0030669	clathrin-coated endocytic vesicle membrane	7/112	75/19880	0.0933333333333333	16.5666666666667	10.1663193099533	2.15792107501547e-07	4.65151876170002e-06	3.25581074476019e-06	HLA-DQB1/HLA-DPB1/HLA-DRA/HLA-DQA1/TF/CD4/TGFA	7
CC	GO:0030666	endocytic vesicle membrane	10/112	207/19880	0.0483091787439614	8.57487922705314	8.24613616101737	2.7102636883041e-07	5.25791155530996e-06	3.68025279780241e-06	HLA-DQB1/HLA-DPB1/ANXA3/HLA-DRA/HLA-DQA1/TF/CD4/HVCN1/TGFA/WLS	10
CC	GO:0045334	clathrin-coated endocytic vesicle	7/112	93/19880	0.0752688172043011	13.3602150537634	8.99295533528462	9.47747808961015e-07	1.67148249944034e-05	1.169947056038e-05	HLA-DQB1/HLA-DPB1/HLA-DRA/HLA-DQA1/TF/CD4/TGFA	7
CC	GO:0042613	MHC class II protein complex	4/112	17/19880	0.235294117647059	41.7647058823529	12.6564312570114	2.1469794584937e-06	3.47095012456482e-05	2.42947675566393e-05	HLA-DQB1/HLA-DPB1/HLA-DRA/HLA-DQA1	4
CC	GO:0042611	MHC protein complex	4/112	25/19880	0.16	28.4	10.3183566127882	1.10215109825496e-05	0.000164474856201124	0.000115123475040396	HLA-DQB1/HLA-DPB1/HLA-DRA/HLA-DQA1	4
CC	GO:0030665	clathrin-coated vesicle membrane	7/112	138/19880	0.0507246376811594	9.0036231884058	7.10158869000983	1.31678077717739e-05	0.000182468193408866	0.000127717834778859	HLA-DQB1/HLA-DPB1/HLA-DRA/HLA-DQA1/TF/CD4/TGFA	7
CC	GO:0034364	high-density lipoprotein particle	4/112	27/19880	0.148148148148148	26.2962962962963	9.9003526018093	1.51584703568642e-05	0.000196049549948776	0.000137224047441086	CLU/APOA1/APOA4/APOC2	4
CC	GO:0009897	external side of plasma membrane	11/112	401/19880	0.027431421446384	4.86907730673317	5.89143617098744	1.66125681685945e-05	0.000201427389044208	0.000140988243009782	IL1R1/IL1RL1/TNFRSF9/BTN3A3/CD40/CD83/TGFBR3/CAPN2/CD2/CD3E/CD4	11
CC	GO:0072562	blood microparticle	7/112	145/19880	0.0482758620689655	8.56896551724138	6.88536352307286	1.81637269789636e-05	0.00020728017846582	0.000145084878036304	HP/CLU/APOA1/IGHG1/APOA4/LGALS3BP/TF	7
CC	GO:0012507	ER to Golgi transport vesicle membrane	5/112	64/19880	0.078125	13.8671875	7.76051480413595	3.03538586975413e-05	0.000327147143740167	0.000228985249823557	HLA-DQB1/HLA-DPB1/HLA-DRA/HLA-DQA1/TGFA	5
CC	GO:0030136	clathrin-coated vesicle	8/112	222/19880	0.036036036036036	6.3963963963964	6.0860508614122	3.74349947047889e-05	0.000377226756196064	0.000264038261254977	HLA-DQB1/HLA-DPB1/HLA-DRA/HLA-DQA1/TF/CD4/GGA2/TGFA	8
CC	GO:0005769	early endosome	11/112	440/19880	0.025	4.4375	5.4884008987658	3.88893563088726e-05	0.000377226756196064	0.000264038261254977	APOA1/APOA4/APOC2/HLA-DRA/RAB1A/FCMR/TF/CLCN4/CD4/GGA2/WLS	11
CC	GO:0098553	lumenal side of endoplasmic reticulum membrane	4/112	35/19880	0.114285714285714	20.2857142857143	8.59545975080949	4.36816944858573e-05	0.000403535653821729	0.000282453062089002	HLA-DQB1/HLA-DPB1/HLA-DRA/HLA-DQA1	4
CC	GO:0042627	chylomicron	3/112	13/19880	0.230769230769231	40.9615384615385	10.8485736531442	4.77789602172257e-05	0.000421323558279172	0.000294903630048905	APOA1/APOA4/APOC2	3
CC	GO:0034358	plasma lipoprotein particle	4/112	37/19880	0.108108108108108	19.1891891891892	8.33557278385845	5.46226724411689e-05	0.000441533268899448	0.00030904933091714	CLU/APOA1/APOA4/APOC2	4
CC	GO:1990777	lipoprotein particle	4/112	37/19880	0.108108108108108	19.1891891891892	8.33557278385845	5.46226724411689e-05	0.000441533268899448	0.00030904933091714	CLU/APOA1/APOA4/APOC2	4
CC	GO:0032994	protein-lipid complex	4/112	40/19880	0.1	17.75	7.9817640448929	7.46076748390681e-05	0.000562522187023958	0.000393735008823063	CLU/APOA1/APOA4/APOC2	4
CC	GO:0034362	low-density lipoprotein particle	3/112	15/19880	0.2	35.5	10.0610973661482	7.53895714568191e-05	0.000562522187023958	0.000393735008823063	APOA1/APOA4/APOC2	3
CC	GO:0098576	lumenal side of membrane	4/112	46/19880	0.0869565217391304	15.4347826086957	7.37749495308702	0.00012980047240528	0.000932640431356459	0.000652797697476849	HLA-DQB1/HLA-DPB1/HLA-DRA/HLA-DQA1	4
CC	GO:0030662	coated vesicle membrane	7/112	205/19880	0.0341463414634146	6.0609756097561	5.48250095923761	0.000162469479088105	0.00112568139082473	0.000787915894825771	HLA-DQB1/HLA-DPB1/HLA-DRA/HLA-DQA1/TF/CD4/TGFA	7
CC	GO:0030134	COPII-coated ER to Golgi transport vesicle	5/112	95/19880	0.0526315789473684	9.34210526315789	6.13471445466003	0.000200842878708242	0.00134356960239307	0.000940425820448755	HLA-DQB1/HLA-DPB1/HLA-DRA/HLA-DQA1/TGFA	5
CC	GO:0034361	very-low-density lipoprotein particle	3/112	21/19880	0.142857142857143	25.3571428571429	8.40586120459884	0.000215005441822042	0.00134551792624116	0.000941789541427619	APOA1/APOA4/APOC2	3
CC	GO:0034385	triglyceride-rich plasma lipoprotein particle	3/112	21/19880	0.142857142857143	25.3571428571429	8.40586120459884	0.000215005441822042	0.00134551792624116	0.000941789541427619	APOA1/APOA4/APOC2	3
CC	GO:0032588	trans-Golgi network membrane	5/112	112/19880	0.0446428571428571	7.92410714285714	5.53116146609015	0.000431103717278064	0.00261356628599827	0.00182935458976547	HLA-DQB1/HLA-DPB1/HLA-DRA/HLA-DQA1/FCMR	5
CC	GO:0030135	coated vesicle	8/112	322/19880	0.0248447204968944	4.40993788819876	4.643410673886	0.000480024116485928	0.00278243694906961	0.00194755489110135	HLA-DQB1/HLA-DPB1/HLA-DRA/HLA-DQA1/TF/CD4/GGA2/TGFA	8
CC	GO:0005774	vacuolar membrane	10/112	495/19880	0.0202020202020202	3.58585858585859	4.38530071226984	0.000490152018598354	0.00278243694906961	0.00194755489110135	HLA-DQB1/CEACAM6/SH3GLB1/HLA-DPB1/CEACAM8/HLA-DRA/HLA-DQA1/LAMTOR5/FCMR/CLCN4	10
CC	GO:0031902	late endosome membrane	6/112	177/19880	0.0338983050847458	6.01694915254237	5.0464394408044	0.000501986047512558	0.00278243694906961	0.00194755489110135	HLA-DQB1/HLA-DPB1/HLA-DRA/HLA-DQA1/LAMTOR5/CLCN4	6
CC	GO:0005802	trans-Golgi network	7/112	265/19880	0.0264150943396226	4.68867924528302	4.55013817177642	0.000761694845949793	0.00410468889206278	0.00287305950665273	HLA-DQB1/HLA-DPB1/HLA-DRA/HLA-DQA1/FCMR/GGA2/WLS	7
CC	GO:0030133	transport vesicle	9/112	444/19880	0.0202702702702703	3.59797297297297	4.16723105228378	0.000920825421316432	0.00482811166852399	0.00337941619771891	HLA-DQB1/HLA-DPB1/CD55/HLA-DRA/HLA-DQA1/RAB1A/CLCN4/DEFA4/TGFA	9
CC	GO:0005765	lysosomal membrane	9/112	451/19880	0.0199556541019956	3.54212860310421	4.1104131468566	0.00102738413793717	0.00511057750666183	0.00357712695799987	HLA-DQB1/CEACAM6/HLA-DPB1/CEACAM8/HLA-DRA/HLA-DQA1/LAMTOR5/FCMR/CLCN4	9
CC	GO:0098852	lytic vacuole membrane	9/112	451/19880	0.0199556541019956	3.54212860310421	4.1104131468566	0.00102738413793717	0.00511057750666183	0.00357712695799987	HLA-DQB1/CEACAM6/HLA-DPB1/CEACAM8/HLA-DRA/HLA-DQA1/LAMTOR5/FCMR/CLCN4	9
CC	GO:0005788	endoplasmic reticulum lumen	7/112	315/19880	0.0222222222222222	3.94444444444444	3.96500397705675	0.00205734794963769	0.0099781375557428	0.0069841548816648	PDIA6/CLU/APOA1/SPP1/APOA4/TF/CD4	7
MF	GO:0023026	MHC class II protein complex binding	6/110	27/18639	0.222222222222222	37.6545454545455	14.6853128857011	9.85210114283002e-09	3.55660851256164e-06	3.24600806074294e-06	HLA-DQB1/HLA-DPB1/HLA-DRA/HLA-DQA1/YWHAE/CD4	6
MF	GO:0140375	immune receptor activity	10/110	156/18639	0.0641025641025641	10.8618881118881	9.53029061134839	2.89059894654777e-08	5.21753109851873e-06	4.76188142247081e-06	IL1R1/IL1R2/IL18R1/HLA-DQB1/IL1RL1/CR1/HLA-DRA/HLA-DQA1/FCMR/CD4	10
MF	GO:0023023	MHC protein complex binding	6/110	37/18639	0.162162162162162	27.4776412776413	12.4213941155178	7.37576451896482e-08	8.87550330448767e-06	8.10040103310873e-06	HLA-DQB1/HLA-DPB1/HLA-DRA/HLA-DQA1/YWHAE/CD4	6
MF	GO:0019955	cytokine binding	8/110	144/18639	0.0555555555555556	9.41363636363636	7.80922294718948	2.2022291553811e-06	0.000198751181273144	0.000181394138324812	IL1R1/IL1R2/IL18R1/IL1RL1/LRG1/TGFBR3/CD4/MMP8	8
MF	GO:0042277	peptide binding	9/110	249/18639	0.036144578313253	6.12453450164293	6.27239263173943	1.68503855192037e-05	0.0012165978344865	0.00111035171947595	HLA-DQB1/HSPG2/HLA-DPB1/ITM2A/CLU/APOA1/HLA-DRA/HLA-DQA1/C1QA	9
MF	GO:0032395	MHC class II receptor activity	3/110	10/18639	0.3	50.8336363636364	12.1450082202929	2.32871662320681e-05	0.0014011111682961	0.00127875140888374	HLA-DQB1/HLA-DRA/HLA-DQA1	3
MF	GO:0003953	NAD+ nucleosidase activity	3/110	11/18639	0.272727272727273	46.2123966942149	11.5568842360041	3.18822081411046e-05	0.0016442110198484	0.00150062122528808	IL1R1/IL18R1/IL1RL1	3
MF	GO:0016799	hydrolase activity hydrolyzing N-glycosyl compounds	4/110	39/18639	0.102564102564103	17.379020979021	7.88921471686583	8.05497958986815e-05	0.003634809539928	0.00331737975214307	IL1R1/IL18R1/IL1RL1/ADPRS	4
MF	GO:0061809	NAD+ nucleosidase activity cyclic ADP-ribose generating	3/110	16/18639	0.1875	31.7710227272727	9.48739770582549	0.000105902137400509	0.00424785240017599	0.00387688526390169	IL1R1/IL18R1/IL1RL1	3
MF	GO:0001540	amyloid-beta binding	5/110	83/18639	0.0602409638554217	10.2075575027382	6.47755798982032	0.000131551175928244	0.00466006162144848	0.00425309604173604	HSPG2/ITM2A/CLU/APOA1/C1QA	5
MF	GO:0042605	peptide antigen binding	4/110	45/18639	0.0888888888888889	15.0618181818182	7.27664733878903	0.00014199633749566	0.00466006162144848	0.00425309604173604	HLA-DQB1/HLA-DPB1/HLA-DRA/HLA-DQA1	4
MF	GO:0004896	cytokine receptor activity	5/110	96/18639	0.0520833333333333	8.82528409090909	5.92264546586	0.000260635844326906	0.0078407949835011	0.00715605432230892	IL1R1/IL1R2/IL18R1/IL1RL1/CD4	5

## Sheet: ards_bpd_ora_kegg
ID	Description	GeneRatio	BgRatio	RichFactor	FoldEnrichment	zScore	pvalue	p.adjust	qvalue	geneID	Count
M00089	Triacylglycerol biosynthesis	2/5	24/833	0.0833333333333333	13.8833333333333	4.97383186703735	0.0075509570957882	0.0226528712873646	0.0158967517806067	23175/129642	2
M00104	Bile acid biosynthesis, cholesterol => cholate/chenodeoxycholate	1/5	13/833	0.0769230769230769	12.8153846153846	3.33460279821228	0.075809928336372	0.113714892504558	0.0797999245646021	1593	1
M00056	O-glycan biosynthesis, mucin type core	1/5	28/833	0.0357142857142857	5.95	2.06927290591846	0.157495199029266	0.157495199029266	0.110522946687204	79623	1

## Sheet: ards_bpd_ora_reactome
ID	Description	GeneRatio	BgRatio	RichFactor	FoldEnrichment	zScore	pvalue	p.adjust	qvalue	geneID	Count
R-HSA-202430	Translocation of ZAP-70 to Immunological synapse	6/95	19/11214	0.315789473684211	37.2764542936288	14.6278140898553	7.82279508266424e-09	3.82534679542281e-06	3.53260956890838e-06	HLA-DQB1/HLA-DPB1/HLA-DRA/HLA-DQA1/CD3E/CD4	6
R-HSA-202427	Phosphorylation of CD3 and TCR zeta chains	6/95	22/11214	0.272727272727273	32.1933014354067	13.5365714614181	2.10768021724988e-08	4.61645210352133e-06	4.26317501326155e-06	HLA-DQB1/HLA-DPB1/HLA-DRA/HLA-DQA1/CD3E/CD4	6
R-HSA-389948	Co-inhibition by PD-1	6/95	23/11214	0.260869565217391	30.7935926773455	13.220326919796	2.83217920461431e-08	4.61645210352133e-06	4.26317501326155e-06	HLA-DQB1/HLA-DPB1/HLA-DRA/HLA-DQA1/CD3E/CD4	6
R-HSA-6798695	Neutrophil degranulation	18/95	479/11214	0.0375782881002088	4.43582023953412	7.10373929515048	8.57405262366341e-08	1.04817793324285e-05	9.67965414618843e-06	CHI3L1/MMP9/CEACAM6/HP/LRG1/CR1/TCN1/CD55/S100A11/CD177/OLFM4/CEACAM8/TTR/CRISP3/HVCN1/MMP8/MGAM/DEFA4	18
R-HSA-202433	Generation of second messenger molecules	6/95	34/11214	0.176470588235294	20.830959752322	10.7041488199767	3.50058201487372e-07	3.4235692105465e-05	3.161578282907e-05	HLA-DQB1/HLA-DPB1/HLA-DRA/HLA-DQA1/CD3E/CD4	6
R-HSA-388841	Regulation of T cell activation by CD28 family	7/95	74/11214	0.0945945945945946	11.1661450924609	8.10997315725467	2.83839065629469e-06	0.000231328838488017	0.000213626244131653	HLA-DQB1/HLA-DPB1/HLA-DRA/HLA-DQA1/CD3E/CD4/PIK3R3	7
R-HSA-975634	Retinoid metabolism and transport	5/95	44/11214	0.113636363636364	13.4138755980861	7.62600330598004	3.28194450009408e-05	0.00229267265792286	0.00211722434667723	HSPG2/APOA1/APOA4/APOC2/TTR	5
R-HSA-6806667	Metabolism of fat-soluble vitamins	5/95	48/11214	0.104166666666667	12.2960526315789	7.24917130626261	5.03819052279164e-05	0.00300965931032457	0.00277934311512053	HSPG2/APOA1/APOA4/APOC2/TTR	5
R-HSA-202424	Downstream TCR signaling	6/95	81/11214	0.0740740740740741	8.74385964912281	6.46522623638775	6.13506711523252e-05	0.00300965931032457	0.00277934311512053	HLA-DQB1/HLA-DPB1/HLA-DRA/HLA-DQA1/CD3E/CD4	6
R-HSA-8963888	Chylomicron assembly	3/95	10/11214	0.3	35.4126315789474	10.0628542744889	6.77019476760129e-05	0.00300965931032457	0.00277934311512053	APOA1/APOA4/APOC2	3
R-HSA-8963901	Chylomicron remodeling	3/95	10/11214	0.3	35.4126315789474	10.0628542744889	6.77019476760129e-05	0.00300965931032457	0.00277934311512053	APOA1/APOA4/APOC2	3
R-HSA-202403	TCR signaling	6/95	103/11214	0.058252427184466	6.87623914154318	5.53772453705516	0.000232811444732091	0.0094870663728327	0.00876106226228658	HLA-DQB1/HLA-DPB1/HLA-DRA/HLA-DQA1/CD3E/CD4	6
R-HSA-8963898	Plasma lipoprotein assembly	3/95	19/11214	0.157894736842105	18.6382271468144	7.11229122586973	0.000517255199952569	0.0194567532905235	0.0179678122088787	APOA1/APOA4/APOC2	3
R-HSA-977606	Regulation of Complement cascade	4/95	47/11214	0.0851063829787234	10.0461366181411	5.744254350579	0.000652340340005781	0.0227853161616305	0.0210416545761263	CR1/CLU/CD55/C1QA	4
R-HSA-8862803	Deregulated CDK5 triggers multiple neurodegenerative pathways in Alzheimer's disease models	3/95	22/11214	0.136363636363636	16.0966507177033	6.55130691092222	0.000807060047957986	0.024665772715716	0.0227782079324984	JUN/YWHAE/CAPN2	3
R-HSA-8863678	Neurodegenerative Diseases	3/95	22/11214	0.136363636363636	16.0966507177033	6.55130691092222	0.000807060047957986	0.024665772715716	0.0227782079324984	JUN/YWHAE/CAPN2	3
R-HSA-9734009	Defective Intrinsic Pathway for Apoptosis	3/95	25/11214	0.12	14.1650526315789	6.09097498209985	0.00118338369435749	0.0340396839141653	0.0314347742959357	JUN/YWHAE/CAPN2	3
R-HSA-196854	Metabolism of vitamins and cofactors	7/95	198/11214	0.0353535353535354	4.17320574162679	4.16398073498901	0.00143325484577012	0.0372006658926727	0.0343538600106697	HSPG2/TCN1/APOA1/APOA4/APOC2/TTR/TPK1	7
R-HSA-166658	Complement cascade	4/95	58/11214	0.0689655172413793	8.14083484573503	5.03962917389301	0.00144542464613657	0.0372006658926727	0.0343538600106697	CR1/CLU/CD55/C1QA	4
R-HSA-2187338	Visual phototransduction	5/95	102/11214	0.0490196078431373	5.78637770897833	4.4884954096773	0.00171103055992511	0.0418346971901689	0.038633268958309	HSPG2/APOA1/APOA4/APOC2/TTR	5

## Sheet: hum_rod_ora_go
ONTOLOGY	ID	Description	GeneRatio	BgRatio	RichFactor	FoldEnrichment	zScore	pvalue	p.adjust	qvalue	geneID	Count
BP	GO:0030098	lymphocyte differentiation	24/156	432/18805	0.0555555555555556	6.69693732193732	10.9560226947016	1.64276798269969e-13	2.43627449364804e-10	1.97269189769072e-10	CD2/LEF1/STAT3/MS4A1/RASGRP1/ICOS/FCGR2B/ITM2A/CD28/TCF7/IL1A/IL1RL2/GATA3/HLX/IL18R1/CD3E/CD4/CD8A/CD79B/LCK/CD27/POU2AF1/CD19/BLNK	24
BP	GO:0007159	leukocyte cell-cell adhesion	24/156	433/18805	0.0554272517321016	6.68147095398828	10.9392152121777	1.72724175373842e-13	2.43627449364804e-10	1.97269189769072e-10	LEF1/RASGRP1/SKAP1/ICOS/CD177/CD24/CD44/LRG1/PDE5A/CD55/DPP4/CD28/IL1A/IL1RL2/IGFBP2/GATA3/HLX/SELP/SELE/CD3E/CD4/LCK/PLA2G2A/CD27	24
BP	GO:1903039	positive regulation of leukocyte cell-cell adhesion	20/156	285/18805	0.0701754385964912	8.45928924876293	11.6053711170166	2.77617481914745e-13	2.61052972160499e-10	2.11378924826315e-10	LEF1/RASGRP1/SKAP1/ICOS/CD24/CD44/CD55/DPP4/CD28/IL1A/IL1RL2/IGFBP2/GATA3/HLX/SELP/SELE/CD3E/CD4/LCK/CD27	20
BP	GO:0022409	positive regulation of cell-cell adhesion	21/156	337/18805	0.0623145400593472	7.51169824241041	11.0321188079233	6.82630354982015e-13	4.81425057851066e-10	3.89817860608151e-10	LEF1/RASGRP1/SKAP1/ICOS/CD24/CD44/CD55/DPP4/CD28/IL1A/IL1RL2/IGFBP2/GATA3/HLX/SELP/KIFAP3/SELE/CD3E/CD4/LCK/CD27	21
BP	GO:1903037	regulation of leukocyte cell-cell adhesion	22/156	395/18805	0.0556962025316456	6.71389159363843	10.4969540482353	1.75367884320487e-12	9.89425603336189e-10	8.01154334685173e-10	LEF1/RASGRP1/SKAP1/ICOS/CD24/CD44/PDE5A/CD55/DPP4/CD28/IL1A/IL1RL2/IGFBP2/GATA3/HLX/SELP/SELE/CD3E/CD4/LCK/PLA2G2A/CD27	22
BP	GO:0045785	positive regulation of cell adhesion	24/156	499/18805	0.0480961923847695	5.79774934484353	9.93460820999183	3.60180706332711e-12	1.69344962094096e-09	1.37121426796839e-09	LEF1/RASGRP1/SKAP1/ICOS/VTN/OLFM4/CD24/CD44/FBLN1/CD55/DPP4/CD28/IL1A/IL1RL2/IGFBP2/GATA3/HLX/SELP/KIFAP3/SELE/CD3E/CD4/LCK/CD27	24
BP	GO:0050867	positive regulation of cell activation	21/156	392/18805	0.0535714285714286	6.45776098901099	9.98745684191376	1.21901342584012e-11	4.9126241061357e-09	3.97783328432041e-09	CD2/LEF1/RASGRP1/ICOS/MMP8/CD24/CD55/DPP4/CD28/IL1A/IL1RL2/IGFBP2/GATA3/HLX/DDR2/SELP/CD3E/CD4/LCK/STAP1/CD27	21
BP	GO:0050851	antigen receptor-mediated signaling pathway	16/156	213/18805	0.0751173708920188	9.05501384374624	10.813161351455	2.7399365553235e-11	9.66170127820948e-09	7.82323990138419e-09	MS4A1/BANK1/SKAP1/FCGR2B/FCMR/CD28/GATA3/CD247/CD3E/CD8A/CD79B/LCK/STAP1/SH2D1A/CD19/BLNK	16
BP	GO:0050863	regulation of T cell activation	20/156	395/18805	0.0506329113924051	6.10353781239857	9.37567698341056	1.06747704927513e-10	3.34594750667239e-08	2.70926923617198e-08	CD2/LEF1/RASGRP1/ICOS/CD24/PDE5A/CD55/DPP4/CD28/TCF7/IL1A/IL1RL2/IGFBP2/GATA3/HLX/CD3E/CD4/LCK/PLA2G2A/CD27	20
BP	GO:0002696	positive regulation of leukocyte activation	19/156	372/18805	0.0510752688172043	6.15686173145851	9.18794932818036	2.79544898645841e-10	7.16905599163562e-08	5.80490363695192e-08	CD2/LEF1/RASGRP1/ICOS/MMP8/CD24/CD55/DPP4/CD28/IL1A/IL1RL2/IGFBP2/GATA3/HLX/CD3E/CD4/LCK/STAP1/CD27	19
BP	GO:0002768	immune response-regulating cell surface receptor signaling pathway	19/156	372/18805	0.0510752688172043	6.15686173145851	9.18794932818036	2.79544898645841e-10	7.16905599163562e-08	5.80490363695192e-08	PIGR/MS4A1/BANK1/SKAP1/FCGR2B/FCMR/BPIFB1/CD24/CD28/GATA3/CD247/CD3E/CD8A/CD79B/LCK/STAP1/SH2D1A/CD19/BLNK	19
BP	GO:0002449	lymphocyte mediated immunity	19/156	384/18805	0.0494791666666667	5.96445980235043	8.98960595181151	4.76698704537404e-10	1.12063920458335e-07	9.07400165654533e-08	CD2/IL18RAP/RASGRP1/C1QA/FCGR2B/FCMR/CD96/CLU/CD55/CD28/IL1R1/GATA3/IL18R1/PRF1/CD8A/C1S/SH2D1A/CD27/CD19	19
BP	GO:0050870	positive regulation of T cell activation	16/156	261/18805	0.0613026819923372	7.38972394144808	9.50736759365142	5.6173682957589e-10	1.15723615384758e-07	9.37033322953509e-08	LEF1/RASGRP1/ICOS/CD24/CD55/DPP4/CD28/IL1A/IL1RL2/IGFBP2/GATA3/HLX/CD3E/CD4/LCK/CD27	16
BP	GO:0002443	leukocyte mediated immunity	21/156	483/18805	0.0434782608695652	5.24108138238573	8.63621365865291	5.74310746326344e-10	1.15723615384758e-07	9.37033322953509e-08	CD2/IL18RAP/RASGRP1/C1QA/FCGR2B/FCMR/CD177/CD96/CLU/CD55/CD28/IL1R1/GATA3/IL18R1/PRF1/CD8A/C1S/STAP1/SH2D1A/CD27/CD19	21
BP	GO:0030217	T cell differentiation	17/156	324/18805	0.0524691358024691	6.32488524849636	8.8425937042213	1.71746243588728e-09	3.22997435442535e-07	2.61536384973712e-07	CD2/LEF1/STAT3/RASGRP1/ICOS/CD28/TCF7/IL1A/IL1RL2/GATA3/HLX/IL18R1/CD3E/CD4/CD8A/LCK/CD27	17
BP	GO:0002429	immune response-activating cell surface receptor signaling pathway	17/156	340/18805	0.05	6.02724358974359	8.55567694260992	3.55236849458292e-09	6.26326970201152e-07	5.07147344292431e-07	MS4A1/BANK1/SKAP1/FCGR2B/FCMR/BPIFB1/CD28/GATA3/CD247/CD3E/CD8A/CD79B/LCK/STAP1/SH2D1A/CD19/BLNK	17
BP	GO:0002460	adaptive immune response based on somatic recombination of immune receptors built from immunoglobulin superfamily domains	18/156	396/18805	0.0454545454545455	5.47931235431235	8.23954989667717	5.35977645998101e-09	8.89407611388614e-07	7.20168106387542e-07	LEF1/STAT3/C1QA/FCGR2B/FCMR/CLU/CD55/CD28/IL1R1/GATA3/HLX/IL18R1/PRF1/CD4/CD8A/C1S/CD27/CD19	18
BP	GO:0050853	B cell receptor signaling pathway	9/156	78/18805	0.115384615384615	13.9090236686391	10.4487957341357	1.65140086990886e-08	2.58811214111827e-06	2.09563736122937e-06	MS4A1/BANK1/FCGR2B/FCMR/CD79B/LCK/STAP1/CD19/BLNK	9
BP	GO:0051251	positive regulation of lymphocyte activation	16/156	337/18805	0.0474777448071217	5.72319866088412	8.00204291423212	2.17904263205157e-08	3.23530487632499e-06	2.61968006180161e-06	LEF1/RASGRP1/ICOS/CD24/CD55/DPP4/CD28/IL1A/IL1RL2/IGFBP2/GATA3/HLX/CD3E/CD4/LCK/CD27	16
BP	GO:0070661	leukocyte proliferation	16/156	344/18805	0.0465116279069767	5.60673822301729	7.88687196098808	2.90281576151149e-08	4.09442163161195e-06	3.31532115919996e-06	LEF1/MS4A1/RASGRP1/FCGR2B/MZB1/CD24/CLU/PDE5A/CD55/GREM1/CD28/IL1A/IGFBP2/CD3E/PLA2G2A/CD19	16
BP	GO:0006959	humoral immune response	15/156	309/18805	0.0485436893203883	5.8516928055763	7.86490121514357	4.59489838870079e-08	6.17248016882139e-06	4.99795965086753e-06	TF/MS4A1/C1QA/FCGR2B/FCMR/CFH/CLU/CD55/CD28/GATA3/CCL17/C1S/SH2D1A/POU2AF1/BLNK	15
BP	GO:0042113	B cell activation	14/156	287/18805	0.0487804878048781	5.88023764853033	7.61981672106429	1.24200618910108e-07	1.59259066338825e-05	1.28954709586093e-05	LEF1/MS4A1/BANK1/RASGRP1/FCGR2B/MZB1/CXCR5/ITM2A/CD28/CD79B/CD27/POU2AF1/CD19/BLNK	14
BP	GO:0046651	lymphocyte proliferation	14/156	300/18805	0.0466666666666667	5.62542735042735	7.38631105174076	2.13558973991722e-07	2.61934724187239e-05	2.12092894078736e-05	LEF1/MS4A1/RASGRP1/FCGR2B/MZB1/CD24/PDE5A/CD55/CD28/IL1A/IGFBP2/CD3E/PLA2G2A/CD19	14
BP	GO:0032943	mononuclear cell proliferation	14/156	308/18805	0.0454545454545455	5.47931235431235	7.24929384508802	2.94014888280899e-07	3.45589999933506e-05	2.79829959460329e-05	LEF1/MS4A1/RASGRP1/FCGR2B/MZB1/CD24/PDE5A/CD55/CD28/IL1A/IGFBP2/CD3E/PLA2G2A/CD19	14
BP	GO:0002697	regulation of immune effector process	16/156	414/18805	0.0386473429951691	4.65873900656509	6.88475634303321	3.63582895774051e-07	4.1026693959144e-05	3.32199951086186e-05	IL18RAP/RASGRP1/FCGR2B/MZB1/CD177/CD96/CFH/CD55/CD28/IL1R1/GATA3/HLX/IL18R1/RTN4/STAP1/SH2D1A	16
BP	GO:0002699	positive regulation of immune effector process	13/156	270/18805	0.0481481481481481	5.80401234567901	7.27192427307311	4.14197313860807e-07	4.49404085538976e-05	3.63889947804839e-05	IL18RAP/RASGRP1/MZB1/CD177/CD55/CD28/IL1R1/GATA3/HLX/IL18R1/RTN4/STAP1/SH2D1A	13
BP	GO:0002705	positive regulation of leukocyte mediated immunity	10/156	155/18805	0.0645161290322581	7.77708850289496	7.74870690771082	6.77070544839014e-07	7.0741333592254e-05	5.72804320585053e-05	IL18RAP/RASGRP1/CD177/CD55/CD28/IL1R1/GATA3/IL18R1/STAP1/SH2D1A	10
BP	GO:0042327	positive regulation of phosphorylation	16/156	437/18805	0.0366132723112128	4.41354221674588	6.6035079862816	7.45056629063908e-07	7.50644553781888e-05	6.07809355288978e-05	TF/CHI3L1/MMP9/BANK1/RASGRP1/VTN/CD24/CCND1/NIBAN1/GREM1/GRB10/ITLN1/DDR2/CD3E/CD4/PSRC1	16
BP	GO:0035710	CD4-positive alpha-beta T cell activation	9/156	134/18805	0.0671641791044776	8.09629735935706	7.53980408575955	1.78049666521646e-06	0.000171883511245897	0.000139176932182913	LEF1/STAT3/ICOS/CD55/CD28/GATA3/HLX/IL18R1/CD3E	9
BP	GO:0002703	regulation of leukocyte mediated immunity	12/156	260/18805	0.0461538461538462	5.56360946745562	6.77706066946327	1.82789980055899e-06	0.000171883511245897	0.000139176932182913	IL18RAP/RASGRP1/FCGR2B/CD177/CD96/CD55/CD28/IL1R1/GATA3/IL18R1/STAP1/SH2D1A	12
BP	GO:0002366	leukocyte activation involved in immune response	13/156	319/18805	0.0407523510971787	4.91248693834901	6.44594230235344	2.67531375269262e-06	0.000240117823152697	0.000194427387168176	LEF1/STAT3/RASGRP1/ICOS/FCGR2B/CD177/ITM2A/CD28/GATA3/HLX/IL18R1/POU2AF1/CD19	13
BP	GO:0031295	T cell costimulation	6/156	48/18805	0.125	15.068108974359	8.92553586084951	2.72377537783988e-06	0.000240117823152697	0.000194427387168176	ICOS/CD24/DPP4/CD28/CD3E/LCK	6
BP	GO:0002263	cell activation involved in immune response	13/156	323/18805	0.0402476780185759	4.85165118679051	6.38606557605523	3.06714324298099e-06	0.000255773393168181	0.000207103962079499	LEF1/STAT3/RASGRP1/ICOS/FCGR2B/CD177/ITM2A/CD28/GATA3/HLX/IL18R1/POU2AF1/CD19	13
BP	GO:0031294	lymphocyte costimulation	6/156	49/18805	0.122448979591837	14.7605965463108	8.82114245524379	3.0826995277271e-06	0.000255773393168181	0.000207103962079499	ICOS/CD24/DPP4/CD28/CD3E/LCK	6
BP	GO:0010562	positive regulation of phosphorus metabolic process	16/156	493/18805	0.0324543610547667	3.91220679253134	5.99290545512953	3.55764141261896e-06	0.000278545184140468	0.000225542659223051	TF/CHI3L1/MMP9/BANK1/RASGRP1/VTN/CD24/CCND1/NIBAN1/GREM1/GRB10/ITLN1/DDR2/CD3E/CD4/PSRC1	16
BP	GO:0045937	positive regulation of phosphate metabolic process	16/156	493/18805	0.0324543610547667	3.91220679253134	5.99290545512953	3.55764141261896e-06	0.000278545184140468	0.000225542659223051	TF/CHI3L1/MMP9/BANK1/RASGRP1/VTN/CD24/CCND1/NIBAN1/GREM1/GRB10/ITLN1/DDR2/CD3E/CD4/PSRC1	16
BP	GO:0002285	lymphocyte activation involved in immune response	11/156	231/18805	0.0476190476190476	5.74023199023199	6.62998448596689	3.69645805780882e-06	0.000278545184140468	0.000225542659223051	LEF1/STAT3/ICOS/FCGR2B/ITM2A/CD28/GATA3/HLX/IL18R1/POU2AF1/CD19	11
BP	GO:0031341	regulation of cell killing	8/156	110/18805	0.0727272727272727	8.76689976689977	7.47207038772096	3.75211520642956e-06	0.000278545184140468	0.000225542659223051	IL18RAP/RASGRP1/FCGR2B/CFH/CD55/PRF1/STAP1/SH2D1A	8
BP	GO:0002455	humoral immune response mediated by circulating immunoglobulin	6/156	54/18805	0.111111111111111	13.3938746438746	8.3416393298601	5.50235263906407e-06	0.000388882810734301	0.000314884866991337	C1QA/FCGR2B/FCMR/CLU/CD55/C1S	6
BP	GO:0050900	leukocyte migration	14/156	395/18805	0.0354430379746835	4.272476468679	6.01184578893646	5.51411287818931e-06	0.000388882810734301	0.000314884866991337	CD177/CXCR5/GREM1/DPP4/HMOX1/IL1R1/IL1A/GATA3/S1PR1/RTN4/SELP/SELE/LCK/STAP1	14
BP	GO:0002706	regulation of lymphocyte mediated immunity	10/156	200/18805	0.05	6.02724358974359	6.53716934713582	6.74448734166297e-06	0.000464053629044664	0.000375751926351955	IL18RAP/RASGRP1/FCGR2B/CD96/CD55/CD28/IL1R1/GATA3/IL18R1/SH2D1A	10
BP	GO:0046631	alpha-beta T cell activation	10/156	201/18805	0.0497512437810945	5.99725730322745	6.51457698428562	7.04764878031752e-06	0.000473367076411327	0.000383293179280427	LEF1/STAT3/ICOS/CD55/CD28/GATA3/HLX/CD247/IL18R1/CD3E	10
BP	GO:0001934	positive regulation of protein phosphorylation	14/156	414/18805	0.0338164251207729	4.07639663074446	5.78894563924864	9.40049908490047e-06	0.000616716463221028	0.00049936555726399	CHI3L1/MMP9/BANK1/RASGRP1/VTN/CD24/CCND1/NIBAN1/GREM1/ITLN1/DDR2/CD3E/CD4/PSRC1	14
BP	GO:0001906	cell killing	11/156	263/18805	0.0418250950570342	5.04180072145852	6.03718005937049	1.26493484335498e-05	0.000810995725705548	0.000656676700976152	CD2/IL18RAP/RASGRP1/FCGR2B/CFH/CD55/CCL17/PRF1/STAP1/SH2D1A/PLA2G2A	11
BP	GO:0043491	phosphatidylinositol 3-kinase/protein kinase B signal transduction	12/156	316/18805	0.0379746835443038	4.57765335929893	5.86603615351483	1.33647557779429e-05	0.000837821689990595	0.000678398129547041	CHI3L1/STAT3/BANK1/RASGRP1/PHLDA3/AGT/CD28/GATA3/DDR2/RTN4/SELP/CD19	12
BP	GO:0070371	ERK1 and ERK2 cascade	12/156	319/18805	0.0376175548589342	4.53460332770678	5.82336745684286	1.46835974459306e-05	0.000900487573803698	0.000729139735873439	TF/CHI3L1/RASGRP1/CD44/FBLN1/MARCO/ACKR3/GRB10/IL1A/DDR2/CD4/PLA2G2A	12
BP	GO:0002708	positive regulation of lymphocyte mediated immunity	8/156	133/18805	0.0601503759398496	7.25081935608251	6.61647986785292	1.52798417548649e-05	0.000917115608307955	0.000742603731423445	IL18RAP/RASGRP1/CD55/CD28/IL1R1/GATA3/IL18R1/SH2D1A	8
BP	GO:1903706	regulation of hemopoiesis	14/156	436/18805	0.0321100917431193	3.87070689249588	5.5468827460278	1.67858881734235e-05	0.000983274536935152	0.000796173714117532	CD2/LEF1/STAT3/RASGRP1/FCGR2B/CREB1/ZFP36/CD28/TCF7/IL1RL2/GATA3/HLX/CD4/CD27	14
BP	GO:0002237	response to molecule of bacterial origin	13/156	379/18805	0.0343007915567282	4.13478452066843	5.63860161137205	1.70792103189729e-05	0.000983274536935152	0.000796173714117532	MMP9/MMP8/FCGR2B/CD96/CD24/ALPL/ZFP36/CD55/IL1A/SELP/SELE/IL12RB2/STAP1	13
BP	GO:0070663	regulation of leukocyte proliferation	11/156	273/18805	0.0402930402930403	4.85711937635015	5.87141670367437	1.79062860891489e-05	0.00101027266114978	0.000818034543441117	FCGR2B/MZB1/CD24/PDE5A/CD55/GREM1/CD28/IL1A/IGFBP2/CD3E/PLA2G2A	11
BP	GO:0030879	mammary gland development	8/156	137/18805	0.0583941605839416	7.0391166011604	6.48850208202409	1.8954686834879e-05	0.00103557268608757	0.000838520393593172	LEF1/CCND1/CREB1/NCOA1/CDO1/GATA3/IRF6/RTN4	8
BP	GO:0032623	interleukin-2 production	6/156	67/18805	0.0895522388059701	10.7950631458094	7.34586038830704	1.94559916209291e-05	0.00103557268608757	0.000838520393593172	ZFP36/CD28/IL1A/GATA3/CD3E/CD4	6
BP	GO:0032663	regulation of interleukin-2 production	6/156	67/18805	0.0895522388059701	10.7950631458094	7.34586038830704	1.94559916209291e-05	0.00103557268608757	0.000838520393593172	ZFP36/CD28/IL1A/GATA3/CD3E/CD4	6
BP	GO:0051896	regulation of phosphatidylinositol 3-kinase/protein kinase B signal transduction	11/156	278/18805	0.039568345323741	4.76976111418557	5.79153017510172	2.11811048992078e-05	0.00110651660964195	0.000895964866106841	CHI3L1/BANK1/RASGRP1/PHLDA3/AGT/CD28/GATA3/DDR2/RTN4/SELP/CD19	11
BP	GO:0006898	receptor-mediated endocytosis	11/156	280/18805	0.0392857142857143	4.73569139194139	5.76010692047607	2.26294513327638e-05	0.00116068513108594	0.000939826017073636	TF/VTN/FCGR2B/FCMR/CLU/MARCO/ACKR3/GREM1/DPP4/DNM3/SELE	11
BP	GO:0030183	B cell differentiation	8/156	141/18805	0.0567375886524823	6.83942535006365	6.36556489906602	2.33449995149778e-05	0.001176004350567	0.000952230243374093	MS4A1/FCGR2B/ITM2A/CD79B/CD27/POU2AF1/CD19/BLNK	8
BP	GO:1902105	regulation of leukocyte differentiation	12/156	340/18805	0.0352941176470588	4.25452488687783	5.53875360060502	2.75460848230791e-05	0.00136328956641941	0.00110387819143272	CD2/LEF1/RASGRP1/FCGR2B/CREB1/CD28/TCF7/IL1RL2/GATA3/HLX/CD4/CD27	12
BP	GO:0050854	regulation of antigen receptor-mediated signaling pathway	6/156	73/18805	0.0821917808219178	9.90779768177028	6.97427946680098	3.18576987551974e-05	0.00154949255497262	0.00125464984208309	FCGR2B/FCMR/LCK/STAP1/SH2D1A/CD19	6
BP	GO:0045580	regulation of T cell differentiation	9/156	192/18805	0.046875	5.65054086538461	5.92387023597547	3.27937160270863e-05	0.00156798428665102	0.00126962290417087	CD2/LEF1/RASGRP1/CD28/TCF7/IL1RL2/GATA3/HLX/CD27	9
BP	GO:0050670	regulation of lymphocyte proliferation	10/156	243/18805	0.0411522633744856	4.96069431254617	5.6835766756365	3.63661199983542e-05	0.00170981374192262	0.0013844645683584	FCGR2B/MZB1/CD24/PDE5A/CD55/CD28/IL1A/IGFBP2/CD3E/PLA2G2A	10
BP	GO:0050852	T cell receptor signaling pathway	8/156	151/18805	0.0529801324503311	6.38648327390049	6.07809451338561	3.81834455830356e-05	0.00176582786868432	0.00142982013658649	SKAP1/CD28/GATA3/CD247/CD3E/CD8A/LCK/SH2D1A	8
BP	GO:0002700	regulation of production of molecular mediator of immune response	9/156	197/18805	0.0456852791878173	5.50712612260836	5.81624405217293	4.01012736978791e-05	0.0018246079532535	0.00147741534676397	FCGR2B/MZB1/CD96/CD55/CD28/IL1R1/GATA3/IL18R1/RTN4	9
BP	GO:0032944	regulation of mononuclear cell proliferation	10/156	248/18805	0.0403225806451613	4.86068031430935	5.59751728862208	4.32014194866213e-05	0.00193446356145649	0.00156636725624007	FCGR2B/MZB1/CD24/PDE5A/CD55/CD28/IL1A/IGFBP2/CD3E/PLA2G2A	10
BP	GO:0002274	myeloid leukocyte activation	10/156	251/18805	0.0398406374501992	4.80258453366023	5.54698010236869	4.78074390424701e-05	0.00210726227404388	0.00170628524214079	CD2/IL18RAP/RASGRP1/C1QA/MMP8/FCGR2B/CD177/CLU/STAP1/PLA2G2A	10
BP	GO:0050855	regulation of B cell receptor signaling pathway	4/156	25/18805	0.16	19.2871794871795	8.36813318715877	5.03224800873553e-05	0.00218399563579122	0.00176841751885929	FCGR2B/FCMR/STAP1/CD19	4
BP	GO:0016064	immunoglobulin mediated immune response	9/156	205/18805	0.0439024390243902	5.2922138836773	5.65147042708116	5.46445293892236e-05	0.00233563965768181	0.00189120620055208	C1QA/FCGR2B/FCMR/CLU/CD55/CD28/C1S/CD27/CD19	9
BP	GO:0046629	gamma-delta T cell activation	4/156	26/18805	0.153846153846154	18.5453648915187	8.18789931624081	5.90892412405968e-05	0.00248792163492125	0.00201451144528036	LEF1/TCF7/CD247/CD3E	4
BP	GO:0019724	B cell mediated immunity	9/156	208/18805	0.0432692307692308	5.21588387573965	5.5918885604905	6.11392322090091e-05	0.00253637903031786	0.00205374820268653	C1QA/FCGR2B/FCMR/CLU/CD55/CD28/C1S/CD27/CD19	9
BP	GO:2000563	positive regulation of CD4-positive alpha-beta T cell proliferation	3/156	10/18805	0.3	36.1634615384615	10.1725562962279	6.4389874089293e-05	0.00263251934501298	0.00213159461134654	CD55/CD28/CD3E	3
BP	GO:0032609	type II interferon production	7/156	124/18805	0.0564516129032258	6.80495244003308	5.93156227294564	7.89951307117421e-05	0.00311207776792793	0.00251990102666229	CD2/CD96/IL1R1/GATA3/IL18R1/CD3E/IL12RB2	7
BP	GO:0032649	regulation of type II interferon production	7/156	124/18805	0.0564516129032258	6.80495244003308	5.93156227294564	7.89951307117421e-05	0.00311207776792793	0.00251990102666229	CD2/CD96/IL1R1/GATA3/IL18R1/CD3E/IL12RB2	7
BP	GO:0002726	positive regulation of T cell cytokine production	4/156	28/18805	0.142857142857143	17.220695970696	7.85588365128489	7.9888552964553e-05	0.00311207776792793	0.00251990102666229	CD55/IL1R1/GATA3/IL18R1	4
BP	GO:0042093	T-helper cell differentiation	6/156	86/18805	0.0697674418604651	8.41010733452594	6.29929646570549	8.05323208290459e-05	0.00311207776792793	0.00251990102666229	LEF1/STAT3/ICOS/GATA3/HLX/IL18R1	6
BP	GO:0050727	regulation of inflammatory response	13/156	442/18805	0.0294117647058824	3.54543740573152	4.95292082244918	8.30375785327968e-05	0.00316552714920297	0.00256317987789714	MMP9/STAT3/MMP8/FCGR2B/ZFP36/AGT/CD28/IL1R1/IL1RL2/GATA3/SELE/STAP1/PLA2G2A	13
BP	GO:0042098	T cell proliferation	9/156	217/18805	0.0414746543778802	4.99955689471818	5.41982245677332	8.46581521481519e-05	0.00318427529613249	0.00257836056367003	RASGRP1/CD24/PDE5A/CD55/CD28/IL1A/IGFBP2/CD3E/PLA2G2A	9
BP	GO:0033632	regulation of cell-cell adhesion mediated by integrin	3/156	11/18805	0.272727272727273	32.8758741258741	9.67182612613914	8.79971296851035e-05	0.0032663145110747	0.00264478907779328	SKAP1/DPP4/CD3E	3
BP	GO:0002819	regulation of adaptive immune response	9/156	219/18805	0.0410958904109589	4.95389884088514	5.38287495020866	9.08053717665979e-05	0.00331185854474993	0.00268166683785419	SKAP1/FCGR2B/CD55/CD28/IL1R1/GATA3/HLX/IL18R1/CD4	9
BP	GO:0002294	CD4-positive alpha-beta T cell differentiation involved in immune response	6/156	88/18805	0.0681818181818182	8.21896853146853	6.20809008817724	9.15721256612883e-05	0.00331185854474993	0.00268166683785419	LEF1/STAT3/ICOS/GATA3/HLX/IL18R1	6
BP	GO:0002287	alpha-beta T cell activation involved in immune response	6/156	89/18805	0.0674157303370786	8.12662057044079	6.16356198767767	9.75260737298987e-05	0.00343901317490055	0.00278462605255106	LEF1/STAT3/ICOS/GATA3/HLX/IL18R1	6
BP	GO:0002293	alpha-beta T cell differentiation involved in immune response	6/156	89/18805	0.0674157303370786	8.12662057044079	6.16356198767767	9.75260737298987e-05	0.00343901317490055	0.00278462605255106	LEF1/STAT3/ICOS/GATA3/HLX/IL18R1	6
BP	GO:0048260	positive regulation of receptor-mediated endocytosis	5/156	56/18805	0.0892857142857143	10.762934981685	6.69183157791938	0.000100054883649592	0.00348462749105553	0.00282156072150246	TF/VTN/CLU/GREM1/SELE	5
BP	GO:0045619	regulation of lymphocyte differentiation	9/156	225/18805	0.04	4.82179487179487	5.27467157333024	0.00011154176165872	0.00383730865413719	0.00310713251347141	CD2/LEF1/RASGRP1/CD28/TCF7/IL1RL2/GATA3/HLX/CD27	9
BP	GO:0048755	branching morphogenesis of a nerve	3/156	12/18805	0.25	30.1362179487179	9.23390472557361	0.000116615550263636	0.00396352370233395	0.00320933093306392	BCL11A/RERE/RTN4	3
BP	GO:0042100	B cell proliferation	6/156	93/18805	0.0645161290322581	7.77708850289496	5.99217064939037	0.000124493044835793	0.00418089142240205	0.00338533718413121	LEF1/MS4A1/RASGRP1/FCGR2B/MZB1/CD19	6
BP	GO:0043410	positive regulation of MAPK cascade	13/156	464/18805	0.0280172413793103	3.37733477011494	4.74239225893277	0.000134698195080064	0.00446467576894249	0.00361512208011538	CHI3L1/BANK1/RASGRP1/FCGR2B/CD24/CD44/MARCO/ACKR3/IL1A/DDR2/CD4/PLA2G2A/CD27	13
BP	GO:0002440	production of molecular mediator of immune response	9/156	231/18805	0.038961038961039	4.69655344655345	5.17023049772662	0.000136108513338906	0.00446467576894249	0.00361512208011538	FCGR2B/MZB1/CD96/CD55/CD28/IL1R1/GATA3/IL18R1/RTN4	9
BP	GO:0002821	positive regulation of adaptive immune response	7/156	136/18805	0.0514705882352941	6.20451546003017	5.57120161380833	0.00014099171281089	0.00457169680275311	0.00370177878765434	SKAP1/CD55/CD28/IL1R1/GATA3/IL18R1/CD4	7
BP	GO:0002456	T cell mediated immunity	7/156	137/18805	0.0510948905109489	6.15922702601535	5.54313776513328	0.000147562937286521	0.00473039825096905	0.00383028198459032	FCGR2B/CD55/IL1R1/GATA3/IL18R1/PRF1/CD8A	7
BP	GO:0038093	Fc receptor signaling pathway	5/156	61/18805	0.0819672131147541	9.88072719630097	6.35392310945988	0.000150725821265407	0.00477750046954733	0.00386842143283185	PIGR/FCGR2B/FCMR/CD247/LCK	5
BP	GO:0042129	regulation of T cell proliferation	8/156	184/18805	0.0434782608695652	5.24108138238573	5.28741822502292	0.000152632623593857	0.00478418479064747	0.00387383383858094	CD24/PDE5A/CD55/CD28/IL1A/IGFBP2/CD3E/PLA2G2A	8
BP	GO:0002292	T cell differentiation involved in immune response	6/156	97/18805	0.0618556701030928	7.4563838223632	5.83070639531256	0.000157063075886853	0.00486895535249245	0.00394247396962952	LEF1/STAT3/ICOS/GATA3/HLX/IL18R1	6
BP	GO:0002685	regulation of leukocyte migration	9/156	236/18805	0.038135593220339	4.59705019556715	5.08590083007964	0.000159895233749337	0.00490287450442261	0.00396993886997783	GREM1/DPP4/HMOX1/IL1R1/IL1A/RTN4/SELP/SELE/STAP1	9
BP	GO:0002286	T cell activation involved in immune response	7/156	140/18805	0.05	6.02724358974359	5.46059033012356	0.000168780931878195	0.00511968826697191	0.00414549657244689	LEF1/STAT3/ICOS/FCGR2B/GATA3/HLX/IL18R1	7
BP	GO:0002702	positive regulation of production of molecular mediator of immune response	7/156	141/18805	0.049645390070922	5.98449718130569	5.43360662988306	0.000176378331330005	0.00529322630512706	0.00428601320253203	MZB1/CD55/CD28/IL1R1/GATA3/IL18R1/RTN4	7
BP	GO:0070372	regulation of ERK1 and ERK2 cascade	10/156	296/18805	0.0337837837837838	4.07246188496188	4.87304618828947	0.000186234799434293	0.00548673017308467	0.00444269649642484	CHI3L1/RASGRP1/CD44/FBLN1/MARCO/ACKR3/IL1A/DDR2/CD4/PLA2G2A	10
BP	GO:0045058	T cell selection	5/156	64/18805	0.078125	9.41756810897436	6.16935685166657	0.000189353368082098	0.00548673017308467	0.00444269649642484	STAT3/CD28/GATA3/CD3E/CD4	5
BP	GO:0051897	positive regulation of phosphatidylinositol 3-kinase/protein kinase B signal transduction	8/156	190/18805	0.0421052631578947	5.07557354925776	5.16408831830444	0.00019017182119682	0.00548673017308467	0.00444269649642484	CHI3L1/AGT/CD28/GATA3/DDR2/RTN4/SELP/CD19	8
BP	GO:0034116	positive regulation of heterotypic cell-cell adhesion	3/156	14/18805	0.214285714285714	25.831043956044	8.50048482174713	0.000190606010975646	0.00548673017308467	0.00444269649642484	SKAP1/CD44/LCK	3
BP	GO:0032633	interleukin-4 production	4/156	35/18805	0.114285714285714	13.7765567765568	6.91951031452956	0.000195280306629125	0.00550885745000761	0.00446061331984422	LEF1/CD28/GATA3/CD3E	4
BP	GO:0032673	regulation of interleukin-4 production	4/156	35/18805	0.114285714285714	13.7765567765568	6.91951031452956	0.000195280306629125	0.00550885745000761	0.00446061331984422	LEF1/CD28/GATA3/CD3E	4
BP	GO:0032496	response to lipopolysaccharide	11/156	357/18805	0.030812324929972	3.71426775838541	4.7355649442288	0.000198397544984836	0.00554138093467547	0.0044869481252433	MMP9/MMP8/CD96/ALPL/ZFP36/CD55/IL1A/SELP/SELE/IL12RB2/STAP1	11
BP	GO:0006956	complement activation	5/156	65/18805	0.0769230769230769	9.27268244575937	6.11051598964782	0.000203772440585586	0.00563570642050921	0.00456332503684956	C1QA/CFH/CLU/CD55/C1S	5
BP	GO:0032743	positive regulation of interleukin-2 production	4/156	36/18805	0.111111111111111	13.3938746438746	6.80765327663872	0.00021827973385081	0.00597832164265179	0.00484074626935368	CD28/IL1A/CD3E/CD4	4
BP	GO:1902107	positive regulation of leukocyte differentiation	8/156	195/18805	0.041025641025641	4.94543063773833	5.06521842282785	0.000226973249481982	0.00609801463608258	0.00493766367294136	LEF1/RASGRP1/CREB1/IL1RL2/GATA3/HLX/CD4/CD27	8
BP	GO:1903708	positive regulation of hemopoiesis	8/156	195/18805	0.041025641025641	4.94543063773833	5.06521842282785	0.000226973249481982	0.00609801463608258	0.00493766367294136	LEF1/RASGRP1/CREB1/IL1RL2/GATA3/HLX/CD4/CD27	8
BP	GO:0033599	regulation of mammary gland epithelial cell proliferation	3/156	15/18805	0.2	24.1089743589744	8.18884321539715	0.000236809330426264	0.00630225585974047	0.00510304118197609	CCND1/GATA3/RTN4	3
BP	GO:0042102	positive regulation of T cell proliferation	6/156	105/18805	0.0571428571428571	6.88827838827839	5.53377920195846	0.000242264371542631	0.0063871756273062	0.00517180212737344	CD24/CD55/CD28/IL1A/IGFBP2/CD3E	6
BP	GO:0070374	positive regulation of ERK1 and ERK2 cascade	8/156	198/18805	0.0404040404040404	4.87049987049987	5.00750186294585	0.000251726291482888	0.00657518396549284	0.00532403559958935	CHI3L1/CD44/MARCO/ACKR3/IL1A/DDR2/CD4/PLA2G2A	8
BP	GO:0043367	CD4-positive alpha-beta T cell differentiation	6/156	107/18805	0.0560747663551402	6.75952552120776	5.4643771185815	0.000268386822402819	0.00692505477166072	0.00560733179891557	LEF1/STAT3/ICOS/GATA3/HLX/IL18R1	6
BP	GO:0002335	mature B cell differentiation	4/156	38/18805	0.105263157894737	12.6889338731444	6.59673318927403	0.000270030494463906	0.00692505477166072	0.00560733179891557	FCGR2B/ITM2A/POU2AF1/CD19	4
BP	GO:2000696	regulation of epithelial cell differentiation involved in kidney development	3/156	16/18805	0.1875	22.6021634615385	7.90615004236551	0.000289686756917512	0.00733289771308078	0.00593756899844597	MMP9/CD24/GATA3	3
BP	GO:0001909	leukocyte mediated cytotoxicity	7/156	153/18805	0.0457516339869281	5.51512485336015	5.12876053441177	0.000291132415407673	0.00733289771308078	0.00593756899844597	CD2/IL18RAP/RASGRP1/FCGR2B/PRF1/STAP1/SH2D1A	7
BP	GO:0002822	regulation of adaptive immune response based on somatic recombination of immune receptors built from immunoglobulin superfamily domains	8/156	204/18805	0.0392156862745098	4.7272498743087	4.89547787433257	0.000307883030151337	0.00763746988831166	0.00618418614438191	FCGR2B/CD55/CD28/IL1R1/GATA3/HLX/IL18R1/CD4	8
BP	GO:0031343	positive regulation of cell killing	5/156	71/18805	0.0704225352112676	8.4890754785121	5.78231530899572	0.000308639336145881	0.00763746988831166	0.00618418614438191	IL18RAP/RASGRP1/PRF1/STAP1/SH2D1A	5
BP	GO:0032760	positive regulation of tumor necrosis factor production	6/156	110/18805	0.0545454545454545	6.57517482517482	5.3635427220383	0.00031166722822483	0.00764533261584562	0.00619055272538107	CD2/STAT3/MMP8/FCGR2B/CLU/IL1A	6
BP	GO:0002369	T cell cytokine production	4/156	40/18805	0.1	12.0544871794872	6.40109035568761	0.000330047562276513	0.00789037434900036	0.00638896708421082	CD55/IL1R1/GATA3/IL18R1	4
BP	GO:0002724	regulation of T cell cytokine production	4/156	40/18805	0.1	12.0544871794872	6.40109035568761	0.000330047562276513	0.00789037434900036	0.00638896708421082	CD55/IL1R1/GATA3/IL18R1	4
BP	GO:0006958	complement activation classical pathway	4/156	40/18805	0.1	12.0544871794872	6.40109035568761	0.000330047562276513	0.00789037434900036	0.00638896708421082	C1QA/CLU/CD55/C1S	4
BP	GO:0045807	positive regulation of endocytosis	7/156	159/18805	0.0440251572327044	5.30700693436542	4.98816647472361	0.000367632893415456	0.00871506212037815	0.00705673046184466	TF/VTN/FCGR2B/CLU/GREM1/SELE/STAP1	7
BP	GO:1903557	positive regulation of tumor necrosis factor superfamily cytokine production	6/156	114/18805	0.0526315789473684	6.3444669365722	5.23480125121628	0.000377683598046187	0.00887871191740244	0.00718924041894935	CD2/STAT3/MMP8/FCGR2B/CLU/IL1A	6
BP	GO:0042060	wound healing	12/156	450/18805	0.0266666666666667	3.21452991452991	4.3488082572631	0.000383007509797086	0.0089294560755172	0.0072303288060868	VTN/TNFRSF12A/CD44/LRG1/FBLN1/MACF1/HMOX1/IL1A/DDR2/HBB/SELP/LCK	12
BP	GO:0033631	cell-cell adhesion mediated by integrin	3/156	18/18805	0.166666666666667	20.090811965812	7.4112520062784	0.000417003956374581	0.00964236197485814	0.00780758054644384	SKAP1/DPP4/CD3E	3
CC	GO:0009897	external side of plasma membrane	19/159	401/19880	0.0473815461346633	5.92418325256042	8.94446618910431	5.49010814382222e-10	1.35056660338027e-07	1.19626566923284e-07	CD2/MS4A1/FCRLA/FCGR2B/CXCR5/CD24/ACKR3/CD28/IL1R1/S1PR1/SELP/SELE/CD3E/IL12RB2/CD4/CD8A/CD79B/CD27/CD19	19
CC	GO:0070820	tertiary granule	12/159	164/19880	0.0731707317073171	9.14864242982052	9.40868963605277	8.29253507597052e-09	1.01998181434437e-06	9.03449874066262e-07	MMP9/CD53/MMP8/OLFM4/CD177/ATP8B4/LRG1/NFASC/CD55/HP/HBB/KCNAB2	12
CC	GO:0045121	membrane raft	13/159	291/19880	0.0446735395189003	5.5855972681493	7.07567104352117	6.48837589302088e-07	3.44850559775723e-05	3.05451715334081e-05	MS4A1/SKAP1/CD177/CD24/CD55/DPP4/ITLN1/S1PR1/SELE/CD4/CD8A/LCK/CD19	13
CC	GO:0042581	specific granule	10/159	160/19880	0.0625	7.81446540880503	7.7708708263829	6.56181629356172e-07	3.44850559775723e-05	3.05451715334081e-05	CHI3L1/CD53/MMP8/OLFM4/CD177/ATP8B4/LRG1/HP/KCNAB2/MS4A3	10
CC	GO:0098857	membrane microdomain	13/159	293/19880	0.0443686006825939	5.54747032433941	7.04127140759282	7.00915771901877e-07	3.44850559775723e-05	3.05451715334081e-05	MS4A1/SKAP1/CD177/CD24/CD55/DPP4/ITLN1/S1PR1/SELE/CD4/CD8A/LCK/CD19	13
CC	GO:0001772	immunological synapse	6/159	48/19880	0.125	15.6289308176101	9.11132022079158	2.21379645438335e-06	8.99448958260492e-05	7.9668778074421e-05	CD53/SKAP1/CD28/CD3E/PRF1/LCK	6
CC	GO:0072562	blood microparticle	9/159	145/19880	0.0620689655172414	7.76057254391672	7.33635393968308	2.55940760480628e-06	8.99448958260492e-05	7.9668778074421e-05	TF/VTN/CFH/GSN/CLU/AGT/HP/HBB/C1S	9
CC	GO:1904724	tertiary granule lumen	6/159	55/19880	0.109090909090909	13.6397941680961	8.42841887452147	4.99396885046706e-06	0.000153564542151862	0.000136019941058774	MMP9/MMP8/OLFM4/LRG1/HP/HBB	6
CC	GO:0035580	specific granule lumen	5/159	62/19880	0.0806451612903226	10.0831811726517	6.43184058662401	0.000137665035967015	0.00376284431643174	0.00333294297604352	CHI3L1/MMP8/OLFM4/LRG1/HP	5
CC	GO:0030667	secretory granule membrane	10/159	322/19880	0.031055900621118	3.88296417828821	4.68313118594187	0.000274577656199253	0.00675461034250163	0.00598290261402583	PIGR/CD53/CD177/ATP8B4/CD44/NFASC/CD55/SELP/KCNAB2/MS4A3	10
CC	GO:0098802	plasma membrane signaling receptor complex	10/159	326/19880	0.0306748466257669	3.83532044603928	4.63473072271056	0.00030286180456767	0.00677309126578606	0.00599927210961795	TF/IL18RAP/SKAP1/TRAF5/CD247/IL18R1/CD3E/CD4/CD8A/CD79B	10
MF	GO:0140375	immune receptor activity	13/156	156/18639	0.0833333333333333	9.95673076923077	10.3205135523503	6.64061858316182e-10	3.11445011550289e-07	2.84498080352301e-07	IL1R2/PIGR/IL18RAP/FCGR2B/FCMR/CXCR5/CD44/ACKR3/IL1R1/IL1RL2/IL18R1/IL12RB2/CD4	13
MF	GO:0004896	cytokine receptor activity	10/156	96/18639	0.104166666666667	12.4459134615385	10.3293215351523	7.68353484503998e-09	1.80178892116188e-06	1.64589404312172e-06	IL1R2/IL18RAP/CXCR5/CD44/ACKR3/IL1R1/IL1RL2/IL18R1/IL12RB2/CD4	10
MF	GO:0019955	cytokine binding	11/156	144/18639	0.0763888888888889	9.12700320512821	8.99415215650555	3.56098632855353e-08	5.56700862697202e-06	5.08533837095188e-06	IL1R2/MMP8/CXCR5/LRG1/ZFP36/ACKR3/GREM1/IL1R1/IL18R1/IL12RB2/CD4	11
MF	GO:0003953	NAD+ nucleosidase activity	4/156	11/18639	0.363636363636364	43.4475524475524	12.9372390412552	1.48848013032103e-06	0.00017452429528014	0.000159424056063331	IL18RAP/IL1R1/IL1RL2/IL18R1	4
MF	GO:0061809	NAD+ nucleosidase activity cyclic ADP-ribose generating	4/156	16/18639	0.25	29.8701923076923	10.6135474925552	7.94536879952782e-06	0.000745275593395709	0.000680792652927962	IL18RAP/IL1R1/IL1RL2/IL18R1	4
MF	GO:0015026	coreceptor activity	6/156	61/18639	0.0983606557377049	11.7522068095839	7.72749563522438	1.18538539053138e-05	0.000926576246932027	0.000846406761309247	IL18RAP/ACKR3/CD28/IL12RB2/CD4/CD8A	6
MF	GO:0043274	phospholipase binding	4/156	23/18639	0.173913043478261	20.7792642140468	8.71980124321191	3.69316149876345e-05	0.00247441820417151	0.00226032590976951	BANK1/SELE/LCK/BLNK	4
MF	GO:1990782	protein tyrosine kinase binding	7/156	117/18639	0.0598290598290598	7.14842209072978	6.12898257081536	5.77268547208287e-05	0.00318633583020314	0.00291064680258709	CD2/BANK1/PTPN14/CD247/CD4/STAP1/BLNK	7
MF	GO:0019865	immunoglobulin binding	4/156	26/18639	0.153846153846154	18.3816568047337	8.14789412543397	6.11450372533651e-05	0.00318633583020314	0.00291064680258709	PIGR/MS4A1/FCGR2B/FCMR	4
MF	GO:0035591	signaling adaptor activity	7/156	129/18639	0.0542635658914729	6.48345259391771	5.74144832143078	0.000107014031758344	0.00501895808946635	0.00458470641322591	STAT3/BANK1/GRB10/TRAF5/CD3E/STAP1/BLNK	7
MF	GO:0019763	immunoglobulin receptor activity	3/156	14/18639	0.214285714285714	25.603021978022	8.46018875782227	0.000195627122832431	0.00834082914621912	0.00761916162610522	PIGR/FCGR2B/FCMR	3

## Sheet: human_rodent_ora_reactome
ID	Description	GeneRatio	BgRatio	RichFactor	FoldEnrichment	zScore	pvalue	p.adjust	qvalue	geneID	Count
R-HSA-449147	Signaling by Interleukins	19/119	460/11214	0.041304347826087	3.8923273657289	6.56012454996906	3.36316401194034e-07	0.000146024024871427	0.000130653074884961	IL1R2/MMP9/STAT3/IL18RAP/PTPN14/CCND1/CREB1/PTPN7/HMOX1/IL1R1/IL1A/IL1RL2/GATA3/IL18R1/S1PR1/IL12RB2/CD4/LCK/BLNK	19
R-HSA-977606	Regulation of Complement cascade	7/119	47/11214	0.148936170212766	14.0350438047559	9.27393194016772	5.61630864890103e-07	0.000146024024871427	0.000130653074884961	C1QA/VTN/CFH/CLU/CD55/C1S/CD19	7
R-HSA-166658	Complement cascade	7/119	58/11214	0.120689655172414	11.3732251521298	8.2024631294984	2.43850169433459e-06	0.000422673627017995	0.000378181666279259	C1QA/VTN/CFH/CLU/CD55/C1S/CD19	7
R-HSA-6798695	Neutrophil degranulation	17/119	479/11214	0.0354906054279749	3.34446764091858	5.43102389605445	1.14104893582878e-05	0.00148336361657742	0.00132722007799032	CHI3L1/MMP9/PIGR/CD53/MMP8/OLFM4/CD177/ATP8B4/CD44/LRG1/GSN/NFASC/CD55/HP/HBB/KCNAB2/MS4A3	17
R-HSA-446652	Interleukin-1 family signaling	9/119	140/11214	0.0642857142857143	6.05798319327731	6.23677215790888	1.72125381116661e-05	0.00179010396361328	0.00160167196744346	IL1R2/STAT3/IL18RAP/PTPN14/PTPN7/IL1R1/IL1A/IL1RL2/IL18R1	9
R-HSA-202430	Translocation of ZAP-70 to Immunological synapse	4/119	19/11214	0.210526315789474	19.8390092879257	8.51125397946636	4.13110215642088e-05	0.00358028853556476	0.00320341605813689	CD247/CD3E/CD4/LCK	4
R-HSA-9008059	Interleukin-37 signaling	4/119	21/11214	0.19047619047619	17.9495798319328	8.05130114157082	6.27507867351801e-05	0.00466148701461338	0.00417080417096986	STAT3/PTPN14/PTPN7/IL18R1	4
R-HSA-202427	Phosphorylation of CD3 and TCR zeta chains	4/119	22/11214	0.181818181818182	17.1336898395722	7.84443975151367	7.60689285092109e-05	0.00494448035309871	0.00442400873698305	CD247/CD3E/CD4/LCK	4
R-HSA-389948	Co-inhibition by PD-1	4/119	23/11214	0.173913043478261	16.3887468030691	7.65074034204208	9.13314809032173e-05	0.00527693000774144	0.00472146369113708	CD247/CD3E/CD4/LCK	4
R-HSA-388841	Regulation of T cell activation by CD28 family	6/119	74/11214	0.0810810810810811	7.64069952305247	5.93550715376324	0.000129448881563232	0.00673134184128805	0.00602277954220509	ICOS/CD28/CD247/CD3E/CD4/LCK	6
R-HSA-6785807	Interleukin-4 and Interleukin-13 signaling	7/119	108/11214	0.0648148148148148	6.1078431372549	5.52384308575149	0.000146110602016116	0.00690704664076182	0.006179989099629	MMP9/STAT3/CCND1/HMOX1/IL1A/GATA3/S1PR1	7
R-HSA-164952	The role of Nef in HIV-1 replication and disease pathogenesis	4/119	28/11214	0.142857142857143	13.4621848739496	6.83764479775272	0.000202705732395352	0.00878391507046525	0.00785929243146891	CD28/CD247/CD4/LCK	4
R-HSA-9707564	Cytoprotection by HMOX1	5/119	60/11214	0.0833333333333333	7.85294117647059	5.51198526080681	0.00042397232759675	0.0162366744341186	0.0145275508094746	STAT3/NCOA1/HMOX1/TXNIP/HBB	5
R-HSA-202433	Generation of second messenger molecules	4/119	34/11214	0.117647058823529	11.0865051903114	6.10000247995116	0.000437141234764732	0.0162366744341186	0.0145275508094746	CD247/CD3E/CD4/LCK	4
R-HSA-198933	Immunoregulatory interactions between a Lymphoid and a non-Lymphoid cell	7/119	133/11214	0.0526315789473684	4.95975232198142	4.75745954198094	0.000524348359823408	0.0181774098072115	0.0162639982485576	FCGR2B/CD96/CD247/CD3E/CD8A/SH2D1A/CD19	7
R-HSA-202733	Cell surface interactions at the vascular wall	7/119	137/11214	0.0510948905109489	4.81494203520824	4.65273039484601	0.000626133929924662	0.0203493527225515	0.0182073155938619	CD2/CD177/VPREB3/CD44/SELP/SELE/LCK	7
R-HSA-9825892	Regulation of MITF-M-dependent genes involved in cell cycle and proliferation	3/119	18/11214	0.166666666666667	15.7058823529412	6.46646056524432	0.000846352288861382	0.025888422953407	0.0231633258004168	LEF1/CCND1/TCF7	3
R-HSA-1433557	Signaling by SCF-KIT	4/119	42/11214	0.0952380952380952	8.97478991596639	5.36227609325266	0.000988361276654564	0.0285526591033541	0.0255471160398431	MMP9/STAT3/GRB10/LCK	4
R-HSA-164938	Nef-mediates down modulation of cell surface receptors by recruiting them to clathrin adapters	3/119	21/11214	0.142857142857143	13.4621848739496	5.91972215813066	0.00134783665636214	0.0368881611214902	0.0330051967929122	CD28/CD4/LCK	3
R-HSA-6783783	Interleukin-10 signaling	4/119	47/11214	0.0851063829787234	8.02002503128911	4.99447760464721	0.00151212977592648	0.0393153741740886	0.0351769137347108	IL1R2/STAT3/IL1R1/IL1A	4
R-HSA-9707616	Heme signaling	4/119	48/11214	0.0833333333333333	7.85294117647059	4.92741963079702	0.0016362245882309	0.0405160374228604	0.0362511913783488	CREB1/NCOA1/HMOX1/HBB	4

## Sheet: hum_rod_ora_kegg
ID	Description	GeneRatio	BgRatio	RichFactor	FoldEnrichment	zScore	pvalue	p.adjust	qvalue	geneID	Count
M00104	Bile acid biosynthesis, cholesterol => cholate/chenodeoxycholate	1/3	13/833	0.0769230769230769	21.3589743589744	4.44532880482151	0.0461464369141158	0.0840662424369916	0.0442453907563113	1593	1
M00089	Triacylglycerol biosynthesis	1/3	24/833	0.0416666666666667	11.5694444444444	3.15694317534436	0.0840662424369916	0.0840662424369916	0.0442453907563113	129642	1
